# Supplementary material for: Comprehensive Proteomic Characterization of the Pectoralis Major at Three Chronological Ages in Beijing-You Chicken
Source: Front Physiol. 2021 Mar 18;12:658711. doi: 10.3389/fphys.2021.658711 (PMC8012914; doi:10.3389/fphys.2021.658711)
Supplement: Supplementary Table 1 — The identified 10,661 peptides and 1,413 proteins list in chicken breast muscle by TMT. [file Table_1.xlsx]

## Sheet: peptides
Sequence	Length	Missed cleavages	Mass	Proteins	Leading razor protein	Start position	End position	Unique (Groups)	Charges	PEP	Score	Intensity	Reporter intensity P90.1	Reporter intensity P120.1	Reporter intensity P150.1	Reporter intensity P90.2	Reporter intensity P120.2	Reporter intensity P150.2	Reporter intensity P90.3	Reporter intensity P120.3	Reporter intensity P150.3
VENTVGEATSSSLLTVQER	19	0	2019.01	A6BM71;Q98918;Q08476	A6BM71	4006	4024	yes	2;3	0	474.91	54612000000	218770	323890	316580	252190	518060	448430	230760	196550	213950
ETADTDTAEQVIASFR	16	0	1752.82	R9PXQ0;P20111;A0A1L1S0L2;A0A1D5PNV5	R9PXQ0	824	839	yes	2;3	0	473.55	321960000000	1110800	1523800	1660800	1002200	1836500	1626800	2310800	1704800	1900000
NLQQEIADLTEQIAEGGK	18	0	1955.98	A0A1D5NYC2;P13538	P13538	1507	1524	no	2;3;4	0	460.79	407560000000	1031700	3708700	3659000	1007000	2628500	2976900	2198900	3541700	3082600
LETDIVQIQSEMEDTIQEAR	20	0	2347.12	A0A1D5NYC2;P13538	P13538	1733	1752	no	2;3	0	456.64	238460000000	452350	542240	613060	490900	658680	740650	414920	511070	510490
NLQQEISDLTEQIAEGGK	18	0	1971.97	A0A1D5P525;Q9DGM4;A0A1D5P603;A0A1D5PUR6;A0A1D5NVW6;F1P3X1;P02565;Q9DGM5;R4GIG1	A0A1D5PUR6	1508	1525	no	2;3;4	6.07e-265	435.94	182310000000	164530	1650500	676680	224830	831570	2462700	3006800	897660	568120
DLADELTLVDVVEDK	15	0	1672.84	P00340;E1BTT8	P00340	43	57	yes	2;3;4	5.54e-216	429.43	744810000000	1566800	4553200	4560000	2235700	5758200	8065700	1796100	2951400	2810500
AIAVLTSGGDAQGMNAAVR	19	0	1800.92	Q90YA3	Q90YA3	6	24	yes	2;3	0	426.33	29381000000	665830	1157600	1175700	367830	763560	768050	1373000	1159400	1172200
NDLQLQVQAEADSLADAEER	20	0	2214.04	A0A1D5P525;Q9DGM4;A0A1D5PUR6;A0A1D5NYC2;P13538	P13538	888	907	no	2;3;4	0	417.43	519330000000	890030	1731000	1691300	974620	1909100	1650300	1426300	1276800	1293400
GTGGVDTAAVGAVFDISNADR	21	0	1991.95	P00565	P00565	321	341	yes	2;3	0	408.89	449120000000	2579800	4285700	4568500	1311900	2152700	2297000	2889200	2756700	2770000
NLTEEMAALDENIAK	15	0	1660.8	A0A1D5P603;A0A1D5PUR6	A0A1D5PUR6	981	995	no	2;3;4	0	408.05	389960000000	425170	2505500	1205400	581580	2040800	2630300	4084400	1139200	930040
NLTEEMAVLDETIAK	15	0	1675.83	A0A1D5NYC2;P13538	P13538	980	994	no	2;3;4	1.69e-215	406.94	1396700000000	2259200	6838300	6851200	1223200	3873900	3268400	6480100	7156500	6923500
LQNEVEDLMVDVER	14	0	1687.81	A0A1D5NYC2;P13538	P13538	1424	1437	no	2;3	3.33e-234	406.55	1339100000000	3147600	3677200	4042200	1868600	2320200	2281600	1517000	1749600	1806900
LVSIGAEEIVDGNVK	15	0	1541.83	P05094;A0A1D5PF13;A0A1D5P9P3;A0A1D5P522;Q5ZIW4;A0A1D5PBQ2;Q5ZJN7;R9PXQ0;P20111;A0A1L1S0L2;A0A1D5PNV5	R9PXQ0	117	131	no	2;3	0	404.81	51169000000	1573800	2994100	3054100	1011400	2163900	2079200	2708300	2548000	2588700
SSIEMTGPLEDQMNQLK	17	0	1919.9	R9PXQ0;P20111;A0A1L1S0L2;A0A1D5PNV5	R9PXQ0	666	682	yes	2;3;4	1.73e-252	404.77	86881000000	758560	1594600	1577400	510940	1248300	1031700	1771200	1495600	1481100
LEQQVDDLEGSLEQEK	16	0	1858.88	A0A1D5P525;Q9DGM4;A0A1D5P603;A0A1D5PUR6;A0A1D5NVW6;A0A1D5NYC2;F1P3X1;P02565;P13538;Q9DGM5;R4GIG1;F1NM49;Q9IBD4;P29616;Q7LZL0	P13538	1030	1045	no	2;3;4	2.23e-226	404.24	711100000000	3745800	9837200	11208000	1107600	2543200	2503100	2760400	2111300	2381700
TASEMVLADDNFSTIVAAVEEGR	23	0	2424.15	P13585;Q03669;A0A1L1RKB7	P13585	729	751	no	2;3;4	1.95e-242	401.79	150200000000	351130	447810	427490	445360	554770	733230	481700	854790	822440
LQNEVEDLMIDVER	14	0	1701.82	A0A1D5P525;Q9DGM4;A0A1D5P603;A0A1D5PUR6;A0A1D5NVW6;F1P3X1;P02565;Q9DGM5;R4GIG1	A0A1D5PUR6	1425	1438	no	2;3	0	396.55	186930000000	457430	1662800	725830	592900	664800	1852000	783980	515590	457400
SYELPDGQVITIGNER	16	0	1789.88	P08023;F1P476;P63270;A0A3Q3AWV3;A0A1D5NV17;P60706;P53478;A0A1L1RPY3;P68034;A0A1L1RU07;P68139;A0A1L1RPH2;A0A1D5PK53;Q5ZMQ2;A0A1D5P5D1	P68139	241	256	no	2;3	0	393.37	1468100000000	4351600	7226600	7432000	4142800	6995300	7387200	8322900	7699900	7647800
AISASGTSDPATLEQPVLIR	20	0	2025.07	Q05623;E1C597	Q05623	211	230	yes	2;3;4	2.37e-203	386.99	60330000000	393360	429750	434700	271070	427880	343720	567220	407110	411580
QIQANDSALEDVNLNNIK	18	0	1998	Q9DEA4;H9KZU7;Q9PUQ7;A0A3Q2UAU4	Q9DEA4	183	200	yes	2;3;4	0	386.06	9855800000	271670	455900	413580	164920	445210	343240	445440	371170	352140
LSADTEVVCGAPSIYLDFAR	20	0	2183.06	P00940	P00940	33	52	yes	2;3	0	385.68	56183000000	549460	824100	813120	404590	572830	680500	1353600	1509700	1499200
HADSTAELGEQIDNLQR	17	0	1895.9	A0A1D5P525;Q9DGM4;A0A1D5NWE9;A0A1D5P603;A0A1D5PUR6;A0A1D5NVW6;A0A1D5NYC2;F1P3X1;P13538;Q9DGM5;R4GIG1	P13538	1199	1215	no	2;3;4	1.97e-226	385.31	1053200000000	2357200	3034100	3402000	2010800	3220500	3067300	2548700	1989500	2277800
AEDEEEINAELTAK	14	0	1560.72	A0A1D5P525;Q9DGM4;A0A1D5P603;A0A1D5PUR6;A0A1D5NVW6;A0A1D5NYC2;F1P3X1;P13538;Q9DGM5;Q7LZL0	P13538	929	942	no	2;3;4	0	383.63	1123400000000	2688800	6101800	6224200	3551100	10159000	7256600	9822600	6990000	7654900
TLDLSGQAFDDALTEFQR	18	0	2025.96	F1NNW0;Q02173;A0A1D5PKV3	F1NNW0	1303	1320	yes	2;3	2.96e-190	383.49	35208000000	299860	534490	511430	107680	149380	213120	189520	290250	266100
SIDDLEDELYAQK	13	0	1537.71	A0A1D5NT47;F1NK75;P04268;F1NM23;A0A1D5P342;Q8AWI4	P04268	252	264	no	2;3;4	0	382.72	958370000000	5466500	10506000	11612000	3749900	10071000	7679100	8321700	6490400	6955100
AVGIVVATGVNTEIGK	16	0	1526.87	P13585	P13585	219	234	yes	2;3	0	381.8	14276000000	600290	1311400	1126500	214790	360820	401550	902600	954970	895120
VLNNMQIGNSLFDEEGSK	18	0	1993.94	F1NU17;P51903	F1NU17	247	264	yes	2;3;4	0	380.78	100020000000	804330	1711400	1798900	360220	912820	808000	1639100	1465500	1461100
AVNDVGSDSCIGSVTLR	17	0	1748.84	A6BM71;Q98918;A0A3Q2U434	A6BM71	3444	3460	no	2;3	2e-201	373.64	42786000000	389380	515020	556390	171910	329750	278420	503760	369050	410760
LESDISQIQSEMEDTIQEAR	20	0	2321.07	A0A1D5P603;P02565;R4GIG1	A0A1D5P603	1734	1753	no	2;3	2.96e-163	371.8	30826000000	39763	55777	53771	94390	83177	78583	519560	139140	121240
MQGTLEDQIISANPLLEAFGNAK	23	0	2459.24	A0A1D5P525;A0A1D5P603;A0A1D5PUR6;A0A1D5NVW6;A0A1D5NYC2;F1P3X1;P02565;P13538;Q9DGM5;R4GIG1	P13538	215	237	no	2;3;4;5	8.86e-179	371.39	135750000000	531280	1296900	1218600	408360	657440	928870	601020	743590	652810
QLEVLQDMADLTVK	14	0	1601.83	P16419	P16419	430	443	yes	2;3	1.41e-139	369.06	49299000000	410560	879990	834430	319590	629430	763750	711120	976860	891060
SFLEELLTTQCDR	13	0	1610.76	P02609	P02609	117	129	yes	2;3	9.14e-290	368.12	180090000000	1070200	2154100	1956800	230460	257790	390510	421760	798170	700100
ATSYIMPSDAVSLAR	15	0	1580.79	A0A3Q3A4C6;A0A1D5NY50;Q9DEG5;Q9DEH4	A0A3Q3A4C6	1066	1080	no	2;3	7.56e-147	367.11	7482800000	129140	262240	267190	101450	182700	160110	239180	174870	175990
ESDTFDDSDLFDGDLPR	17	0	1942.81	A0A3Q3A7M3;E1BRC1	A0A3Q3A7M3	72	88	no	2;3	2.49e-158	366.46	3719500000	41424	57589	69044	50769	82371	73529	73481	45365	42684
YADLTEDQLPTCESLK	16	0	1881.87	Q5ZLN1;F1NHM9	Q5ZLN1	142	157	yes	2;3;4	6.99e-157	366.19	374200000000	2130600	3479100	3988500	1324400	2950600	2541800	3387400	2696100	2812200
NAYEESLDNLETLK	14	0	1637.78	A0A1D5NZY9;Q8UWA0;P79793	A0A1D5NZY9	1494	1507	no	2;3	3.66e-160	365.16	4805200000	0	0	0	84472	680770	229070	309730	290400	280010
MEIDDLASNMESVSK	15	0	1667.74	A0A1D5P525;Q9DGM4;A0A1D5NWE9;A0A1D5P603;A0A1D5PUR6;A0A1D5NVW6;A0A1D5NYC2;F1P3X1;P02565;P13538;Q9DGM5;R4GIG1	P13538	1229	1243	no	2;3;4	4.54e-168	364.53	748240000000	5815000	11349000	11609000	4001100	9990700	8116800	11171000	8361100	8688700
IVESMQSTLDAEVR	14	0	1576.78	A0A1D5P603	A0A1D5P603	1597	1610	yes	2;3	1.14e-261	362.35	52657000000	296000	427450	430990	554260	1063900	458990	1589500	642820	574060
ISASNPYSTVTVEEIR	16	0	1764.89	R9PXQ0;P20111;A0A1L1S0L2;A0A1D5PNV5	R9PXQ0	596	611	yes	2;3	2.16e-157	362.15	103860000000	310260	446190	481630	213600	401190	411370	1182900	811960	963650
EAAIIDTTSSFTSLVLDSVNR	21	0	2238.14	A0A3Q2TS15	A0A3Q2TS15	2421	2441	no	2;3	3.92e-130	357.92	1995400000	63300	105720	88873	17020	16769	39497	16254	42278	36670
DLEEATLQHEATAAALR	17	0	1837.92	A0A1D5P525;Q9DGM4;A0A1D5NWE9;A0A1D5P603;A0A1D5PUR6;A0A1D5NVW6;A0A1D5NYC2;A0A1D5PFB7;A0A1D5NXZ4;F1P3X1;P02565;P13538;Q9DGM5;R4GIG1	P13538	1180	1196	no	2;3;4	2.35e-252	355.89	1748400000000	2515200	3255500	3526000	2092800	2986500	3240600	2984300	2854900	3026800
VVIGMDVAASEFCR	14	0	1552.74	P07322	P07322	240	253	yes	2;3	0	355.02	77258000000	1407400	2062400	2118100	1070700	1303300	1689600	2004300	2844900	2718400
EDSGTYEITVANVVGQK	17	0	1808.88	A0A3Q2TS15	A0A3Q2TS15	2731	2747	yes	2;3	1.58e-157	354.38	13927000000	219520	417090	441930	305400	396720	442800	568460	526400	570130
LELQAFDQIDDEIK	14	0	1675.83	A0A140F3I0;A0A140F3H9;A0A140F3H8;A0A140F3H6;A0A3Q2TXF6;P19204;F1NQT9	A0A140F3I0	121	134	yes	2;3;4	1.54e-119	354.02	351120000000	543500	1773200	1735400	521040	1488600	1707800	911060	827620	788610
CSITTTETSAILEIPNSK	18	0	1963.98	A6BM71;Q98918;Q08476	A6BM71	3885	3902	yes	2;3	8.23e-132	352.49	5805000000	70447	148630	149570	59727	225480	246770	232980	212520	200870
DQEGQDVLLFIDNIFR	16	0	1920.96	Q5ZLC5;A0A1L1RY04	Q5ZLC5	300	315	yes	2;3	3.06e-252	352.27	2612100000	31587	57476	42270	27652	28262	29937	202930	249260	243160
MEGDLNEMEIQLSHANR	17	0	1985.89	A0A1D5P525;Q9DGM4;A0A1D5PUR6;A0A1D5NYC2;A0A1D5P600;Q90WH5;A0A1D5PFB7;A0A1D5NXZ4;F1P3X1;P13538;Q910C5;A0A1D5NZY9;F1NM49;Q9IBD4;P29616;Q8UWA0;P79793;Q91411	P13538	1621	1637	no	2;3	8.88e-253	352.27	964690000000	2261900	2841500	3194800	1773400	2362600	2695200	2456400	2744500	2806500
IVESLQSSLDAEIR	14	0	1558.82	A0A1D5P525;Q9DGM4;F1P3X1	A0A1D5P525	1598	1611	no	2;3	6.67e-140	352.15	40597000000	320950	823090	508880	145350	275870	423700	459000	414460	419580
CQLEINFNTLQTK	13	0	1607.8	Q90734;A0A1D5NXS9;A0A1D5PIX0;P05094;A0A1D5PF13;A0A1D5P9P3;A0A1D5P522;R9PXQ0;P20111;A0A1L1S0L2;A0A1D5PNV5	R9PXQ0	342	354	no	2;3	1.34e-232	351.81	19972000000	64360	183400	163560	125570	323600	406110	191400	200860	167190
IFANTADSACLLGMR	15	0	1638.79	A0A1D5PUQ7;Q90YA3	Q90YA3	688	702	no	2;3	8.4e-242	350.4	10051000000	158730	274020	277100	87916	126360	188400	140710	201070	170810
GTGGVDTAAVADVYDISNLDR	21	0	2108	P11009;F1NAD3	P11009	355	375	yes	2;3	2.52e-163	349.47	31328000000	193360	195800	212890	179550	292990	282630	338750	251340	310000
ACLISMGYDLGEAEFAR	17	0	1901.87	R9PXQ0;P20111;A0A1L1S0L2	R9PXQ0	783	799	yes	2;3	2.08e-252	347.29	22938000000	414330	645270	605300	361770	450880	569770	570240	866160	777870
QAEEAEELSNVNLSK	15	0	1659.8	A0A1D5P525;Q9DGM4;A0A1D5P603;A0A1D5PUR6;A0A1D5NYC2;P02565;P13538;R4GIG1	P13538	1884	1898	no	2;3;4	1.41e-241	346.63	1463500000000	4113400	9156900	9875800	3336000	9044800	7106300	9285100	6872000	7262800
DVLICPDASLEDAR	14	0	1572.75	D5M8S2;Q8UW59	D5M8S2	49	62	yes	2;3	2.11e-233	346.55	46208000000	402970	458860	581900	228660	407420	354550	382360	269400	338620
TIDDLEDEVYAQK	13	0	1537.71	P19352	P19352	252	264	no	2;3	3.21e-232	345.97	250460000000	230740	1167100	686000	265880	740010	1255000	2127700	538050	577980
VTAGDSCTLECTVDGTPELTAR	22	0	2352.06	A6BM71;Q98918	A6BM71	3568	3589	yes	2;3;4	2.68e-130	345.69	42801000000	200340	255080	273190	158340	277550	253670	204660	134410	153480
VDQSILTGESVSVIK	15	0	1573.86	P13585;Q03669;A0A1L1RKB7	P13585	175	189	no	2;3;4	3.05e-217	344.47	108740000000	1624700	2974500	2981600	658700	1555800	1351000	2114200	1937600	2027300
GFNQVYVDQVDEDIVAVTR	19	0	2166.06	F1NX83;A0A1D5PF87	F1NX83	714	732	yes	2;3	1.22e-239	344.38	17476000000	389830	397090	317180	256740	223680	264740	105720	207960	184940
NQENISSVLYSDSFR	15	0	1757.82	Q9DEH4	Q9DEH4	2124	2138	yes	2;3	5.41e-216	342.43	6483100000	124100	277510	270020	113680	250930	294110	377540	341330	333520
NAAGCLSEPSESTGPITAR	19	0	1916.89	A0A3Q2TS15	A0A3Q2TS15	4117	4135	yes	2;3;4	1.91e-238	341.27	68678000000	184240	289440	294700	125680	351120	263560	383090	283410	327150
RFDEIMEASDGIMVAR	16	1	1838.87	A0A1D5P9V0;P00548;F1NW43	A0A1D5P9V0	298	313	no	2;3	4.82e-226	341.27	34358000000	408630	780100	688060	520530	737010	847880	569880	806640	759280
DLYANNVMSGGTTMYPGIADR	21	0	2245.01	P68139;A0A1D5PK53	P68139	294	314	yes	2;3;4	4.38e-130	340.9	400650000000	2359600	4233900	4092800	1428500	2771800	2807600	4167500	4013600	3935900
TTNLEEGIEYEFR	13	0	1599.74	A0A3Q2TS15	A0A3Q2TS15	2920	2932	yes	2;3	1.46e-206	340.14	63839000000	314510	540230	512080	243630	464630	452470	565840	521540	525130
GITNLCVIGGDGSLTGADTFR	21	0	2123.03	Q90YA3	Q90YA3	98	118	yes	2;3	1.71e-116	339.81	37385000000	121240	165630	167920	51293	85165	116360	227560	283690	265760
SLPSVETLGCTSVICSDK	18	0	1951.92	P13585;Q03669;A0A1L1RKB7;A0A3Q2UHS6;Q9YGL9;F1NNV0	P13585	335	352	no	2;3;4	9.03e-116	339.61	146380000000	597330	1064400	1136200	374140	957780	818670	1328200	1123300	1151200
IVESMQSTLDAEIR	14	0	1590.79	A0A1D5PUR6;A0A1D5NVW6;A0A1D5NYC2;P13538;Q9DGM5	P13538	1596	1609	no	2;3	6.33e-210	337.99	808930000000	3698000	4893600	5251400	2955300	4865000	4416300	4666900	4347700	4594900
FAIQDISVEETSAK	14	0	1536.77	Q90734;A0A1D5NXS9;A0A1D5PIX0;P05094;A0A1D5PF13;A0A1D5P9P3;A0A1D5P522;Q5ZIW4;A0A1D5PBQ2;Q5ZJN7;R9PXQ0;P20111;A0A1L1S0L2;A0A1D5PNV5	R9PXQ0	144	157	no	2;3	1.62e-207	337.49	90807000000	906860	1746900	1786000	762630	1687900	1800500	1788700	1610500	1620400
FSAEEEFPDLSK	12	0	1397.64	P00565	P00565	14	25	yes	2;3;4	1.71e-111	336.96	628900000000	2643500	6741400	7178000	2216900	5791900	4973300	8223900	6156000	6506300
GAEEMETVIPTDVMR	15	0	1676.78	D5M8S2;Q8UW59	D5M8S2	13	27	yes	2;3	2.11e-215	336.17	70410000000	546360	479000	545790	504360	664760	563040	642010	427820	510330
VLAENEFGIGEPAETAEPVR	20	0	2127.05	A0A3Q2TS15	A0A3Q2TS15	377	396	yes	2;3	2.65e-129	335.91	92915000000	297700	397510	434660	336200	632960	489480	464070	338690	381180
ACANPANGSVILLENLR	17	0	1810.94	F1NU17;P51903	F1NU17	107	123	yes	2;3	4.23e-226	335.9	8477500000	199920	128580	147370	30892	60812	75215	36646	51296	57424
VNAESSENNTVLTIK	15	0	1617.82	A0A3Q2TS15	A0A3Q2TS15	1630	1644	yes	2;3	2.38e-215	335.1	5602300000	205140	488300	383090	95988	320660	327780	247270	225030	233290
SELQAALEEAEASLEHEEGK	20	0	2169.01	R4GIG1	R4GIG1	1543	1562	yes	2;3;4	1.3e-251	333.75	167160000000	159340	1149400	446200	235040	332190	4614300	237270	178670	215550
VNVSDLTDLTVLNIK	15	0	1642.91	A0A3Q2TS15	A0A3Q2TS15	2712	2726	yes	2;3	2.79e-215	333.44	9286800000	115010	265470	222870	54625	85792	124740	170020	316530	277530
VNQIGSVTESLQACK	15	0	1632.81	A0A1D5PSH6;A0A1L1RQQ0;A0A1L1RKH8;A0A1L1RNS0;P51913;F1NZ78	A0A1L1RQQ0	344	358	no	2;3;4	5.15e-171	333.32	325980000000	1969400	3593700	4102500	1822900	4815000	3827400	6694800	5465400	5847800
FDEIMEASDGIMVAR	15	0	1682.76	A0A1D5P9V0;P00548;F1NW43	A0A1D5P9V0	299	313	no	2;3	2.07e-94	331.48	46300000000	739930	1259000	1111700	467160	696870	1079400	892740	1163900	1130900
LEEAGGATAAQLEMNK	16	0	1631.78	F1NM49;Q9IBD4	F1NM49	1151	1166	yes	2;3;4	2.33e-160	331.44	745130000000	5546700	7574400	9271600	3530300	7649200	5375200	7818200	7031400	7674600
WADAGAEYVVESTGVFTTMEK	21	0	2290.05	P00356;F1NH87;H9NDQ3	P00356	85	105	yes	2;3;4	1.69e-115	331.42	217920000000	1487700	2565400	2130100	1252900	1594000	2097400	1822100	4448700	4125300
YEETQTELEASQK	13	0	1554.7	A0A1D5PUR6;A0A1D5NYC2;P13538	P13538	1463	1475	no	2;3;4	2.46e-182	331.25	530520000000	1033200	2254900	2686500	941640	2480800	2168400	1643800	1437800	1727100
AEGSDVANAVLDGADCIMLSGETAK	25	0	2493.14	A0A1D5P9V0;P00548;F1NW43	A0A1D5P9V0	362	386	no	2;3;4;5	5.73e-147	331.19	461650000000	1452900	2443800	2545200	999580	2461900	2123800	3832400	2809100	2984500
EGSNEWVAANTELVER	16	0	1802.84	P16419;A0A3Q2TY75	P16419	770	785	yes	2;3	1.62e-201	330.68	117110000000	383210	578530	606640	317530	598960	547150	648580	521050	576910
LVSWYDNEFGYSNR	14	0	1748.78	P00356;F1NH87	P00356	308	321	yes	2;3	3.07e-183	329.73	25348000000	318140	532030	413700	90554	69097	107160	216470	389760	336120
YQATLTDNTCSLK	13	0	1513.71	A6BM71;Q98918	A6BM71	3699	3711	yes	2;3	4.43e-85	329.7	15852000000	146990	300820	291370	161570	373770	320470	539780	449140	448640
VSDNLETAVNLAWTAGSNSTR	21	0	2205.07	F6T197;Q9I9D1	Q9I9D1	198	218	no	2;3	1.28e-145	328.73	5378200000	62869	101400	92893	27628	55210	61521	123080	113450	100980
TFTTQETITNAVTAK	15	0	1624.83	F1NIJ6;Q5ZMU3;A0A1L1RQ91;A0A1L1RPE8;A0A1D5PRS4	F1NIJ6	183	197	yes	2;3	1.02e-109	328.29	49246000000	647960	1445500	1510800	600990	1712100	1483100	2340200	1958700	2004000
GYDVIAQAQSGTGK	14	0	1393.68	A0A1L1RUX2;A0A1D5PVM5;Q8JFP1	A0A1L1RUX2	33	46	yes	2;3	2.03e-86	328.26	6783900000	133240	214460	232720	77636	172050	123920	349760	235410	228240
LCYVALDFENEMATAASSSSLEK	23	0	2535.15	P08023;F1P476;P63270;A0A3Q3AWV3;A0A1D5NV17;P68034;A0A1L1RU07;P68139;A0A1L1RPH2;A0A1D5PK53	P68139	218	240	no	2;3;4;5	5.14e-132	327.83	447610000000	2113400	4016300	3880300	1364800	2035600	2636000	3203400	4818000	4319500
NVTELNEPLSNEER	14	0	1642.78	Q5F3W6;F1NMY1;A0A3Q2U4C6	Q5F3W6	29	42	yes	2;3	4.12e-141	327.62	32616000000	104050	237860	246050	65168	184390	149710	230130	168580	184410
DATNVGDEGGFAPNILENK	19	0	1959.92	A0A1D5PSH6;A0A1L1RQQ0;A0A1L1RKH8;A0A1L1RNS0;P51913;F1NZ78;Q5ZIQ4	A0A1L1RQQ0	203	221	no	2;3;4	3.24e-102	327.1	19776000000	185550	213910	195050	249440	585460	369400	729340	500280	424990
AAFDMFDADGGGDISTK	17	0	1716.73	P02588	P02588	25	41	yes	2;3	1.19e-201	326.81	219240000000	2498000	4708000	4983900	1626800	3657600	3171500	4902700	4359500	4554000
AYLESDVAVSEELIQK	16	0	1792.91	A0A3Q2U086;Q4FZ83;A0A1D5PD62;Q4FZ82;A0A1D5P5K2;A0A1D5NVV2;Q6RSS8;Q5MAJ0;A0A1D5PPG9	A0A3Q2U086	82	97	yes	2;3	1.37e-104	326.01	21331000000	434210	702870	732290	365890	526960	584230	631830	695730	714020
GINYTQLSIDNCDR	14	0	1667.76	A0A3Q2TS15	A0A3Q2TS15	3510	3523	yes	2;3	6.35e-183	326.01	23071000000	256510	334890	403080	171770	242360	279600	276180	257290	269320
FGVTFATEGETLTLK	15	0	1612.83	F1NNW0;Q02173;A0A1D5PKV3	F1NNW0	272	286	yes	2	6.92e-191	325.93	719280000	46809	138230	110250	17282	29316	43200	33846	79118	66598
TVDLSGQAFDEAFAEFQR	18	0	2029.94	F1N9Z6;A0A1D5PSF9;Q90724	F1N9Z6	1449	1466	yes	2;3	5.68e-213	325.79	2810500000	10055	17187	17612	76554	90603	117910	90933	156600	150500
SELQASLEEAEASLEHEEGK	20	0	2185	A0A1D5P603;A0A1D5NYC2;P13538	P13538	1541	1560	no	2;3;4	3.93e-227	325.35	1591600000000	2997000	3877700	5152400	1861000	2669000	2914900	4203900	3461400	4467800
TLALLFATYGGEAEGGGGK	19	0	1810.91	A0A1D5NYC2;P13538	P13538	619	637	no	2;3;4	1.4e-102	324.81	4799800000	117800	515330	299590	96116	120060	161520	145400	443240	320870
SGETEDTFIADLVVGLCTGQIK	22	0	2352.15	A0A1D5PSH6;A0A1L1RQQ0;A0A1L1RKH8;A0A1L1RNS0;P51913;P07322	A0A1L1RQQ0	373	394	no	2;3;4	1.04e-241	323.59	41465000000	556470	1490700	1066500	377530	599740	822670	416850	1300600	1162900
CTVSELVMGNEYR	13	0	1556.7	P16419	P16419	982	994	yes	2;3	2.1e-85	322.99	32422000000	417090	633650	586310	241410	514240	499660	437940	392050	391640
VAEQELLDATER	12	0	1372.68	A0A1D5NYC2;P13538	P13538	1704	1715	no	2;3	2.86e-174	322.99	926910000000	2622600	3300400	3385400	2010600	3961200	2676900	2984000	2548000	2939100
VAPEEHPTLLTEAPLNPK	18	0	1955.04	P08023;F1P476;P63270;A0A3Q3AWV3;P68034;A0A1L1RU07;P68139;A0A1L1RPH2;A0A1D5PK53	P68139	98	115	no	2;3;4;5	3.18e-116	322.92	921740000000	5713200	5291600	6986300	3798900	4278700	4703900	6375000	4964700	6381400
DSMATFECETSEPFIK	16	0	1890.8	A6BM71;Q98918;Q9YH41;Q9IAR9	A6BM71	1916	1931	no	2;3	6.98e-201	322.31	19881000000	198740	489000	483690	261530	658730	568730	646980	524450	522560
ALQEAHQQTLDDLQAEEDKVNTLTK	25	1	2837.4	A0A1D5P525;Q9DGM4;A0A1D5P603;A0A1D5PUR6;A0A1D5NVW6;F1P3X1;P02565;Q9DGM5;R4GIG1	A0A1D5PUR6	1002	1026	no	2;3;4;5;6	1.19e-236	321.25	138890000000	227230	1570400	806940	297160	726040	1825900	1050600	429070	342060
NAGPADIGEYSVEVEGR	17	0	1761.82	A6BM71;A6BLM5;A6BM73;A6BLM8	A6BM71	5605	5621	no	2;3	1.79e-179	320.35	30791000000	120260	312780	302400	81562	241110	193700	413500	293810	330860
SPWETEQVDETYVK	14	0	1709.78	A6BM71;Q98918;Q9IAR9;O42096	A6BM71	471	484	no	2;3	3.57e-86	319.7	33973000000	496550	811670	777770	278690	539020	536180	461760	344870	379580
AAEGSSNVFSMFDQTQIQEFK	21	0	2363.07	P02609	P02609	10	30	yes	2;3;4	1.83e-116	319.28	110120000000	877140	1827200	1870300	1082200	1671800	1769600	1616300	2003600	1757100
GIGCYAWDTPDFALAEK	17	0	1912.87	A0A3Q3A4C6;A0A1D5NY50;Q9DEH4	A0A3Q3A4C6	1699	1715	no	2;3	1.02e-90	317.84	4018300000	213580	393720	353060	95097	163960	211400	279480	509660	440620
TLGSSATDGEITSK	14	0	1365.66	A0A1D5PLW0	A0A1D5PLW0	397	410	yes	2;3	2.4e-160	317.44	7723500000	66816	131320	218610	64723	160790	215990	229500	328920	294400
ILGADTSAELEETGR	15	0	1560.76	A0A1L1RY35;A0A1D5PN54;A0A175KE65;Q8UVX3;A0A1D5PJG9;A0A1L1RZJ6;A0A182C637;A0A1D5P3S4	A0A1L1RY35	59	73	no	2;3	8.98e-80	317.31	26304000000	413160	458820	526300	323440	590510	510880	445050	293110	325030
SEEELANCFR	10	0	1253.53	P02588	P02588	95	104	yes	2;3	2.55e-142	317.1	225530000000	1047200	1396000	1713700	1258900	2087400	2203300	1412300	1308600	1305700
TKLEQQVDDLEGSLEQEK	18	1	2088.02	A0A1D5P525;Q9DGM4;A0A1D5P603;A0A1D5PUR6;A0A1D5NVW6;A0A1D5NYC2;F1P3X1;P02565;P13538;Q9DGM5;R4GIG1	P13538	1028	1045	no	2;3;4;5	3.4e-169	316.8	558520000000	2447100	7344800	7631800	1335400	3819900	3627200	6277600	5187100	5070700
AETYSDSSCLVIDTAER	17	0	1915.85	A0A1D5PCL3;A0A3Q3AWG5;A0A3Q3A8C1;A0A1D5PBR5;E1C5Z5;A0A3Q2UBY4;A0A1D5PE78;A0A1D5PHW7	A0A3Q2UBY4	571	587	no	2;3	3.36e-91	316.42	8274800000	70774	178370	112310	36926	80563	184630	166510	131900	142140
DTTTTVWETVSATVAR	16	0	1736.86	A0A3Q2TS15	A0A3Q2TS15	2800	2815	yes	2;3	7.71e-90	316.12	8349700000	229660	321290	309350	89157	135300	157620	345590	446200	412460
ITLSQVGDIVR	11	0	1199.69	P02604;P02605;F1NZG0	P02604	68	78	no	1;2;3	7.2e-73	315.8	287800000000	1094100	1913600	2235700	382990	639970	727560	1769900	1878400	1841700
GGPVEGLDFSEYQPELFER	19	0	2168.01	A0A3Q2UD12;P15989;F1P2F0;A0A1D5PGD5;A0A3Q3AR07;A0A3Q2UMJ2;A0A3Q2U4U7	A0A3Q2UD12	1694	1712	yes	2;3	8.79e-103	315.73	5414700000	205630	181980	203940	164840	203240	232300	214770	225810	193250
IEELEEELEAER	12	0	1487.7	A0A1D5P600;Q90WH5;A0A1D5PFB7;A0A1D5NXZ4;Q910C5;Q90767;A0A1D5NZY9;F1NM49;Q9IBD4;P29616;Q8UWA0	A0A1D5NZY9	1123	1134	no	1;2;3	3.93e-154	315.5	1311700000000	766910	1374900	1371900	1240800	2882400	2561600	1765700	1600100	1696400
EPEDDGGSVITNYVVER	17	0	1877.86	Q07784	Q07784	677	693	yes	2;3	1.93e-104	315.21	31569000000	111690	114900	114910	279790	197490	191630	248180	186790	260580
GVVDSEDLPLNISR	14	0	1512.78	A0A1D5PHC5;F1NC33;Q04619;P11501;A0A1D5PUL6;A0A1D5P5R0;A0A1L1RND0	P11501	383	396	no	2;3	3.67e-160	315.11	48956000000	343760	378460	381230	347230	521400	417550	501950	386260	365880
TITLEVEPSDTIENVK	16	0	1786.92	P79781;Q91021;A0A1D5P546;P0CG62;Q9PST8	P79781	12	27	yes	2;3;4	7.97e-78	314.35	37412000000	469530	836050	891050	319480	677000	616950	1127000	854930	880400
TEELEEEIEAER	12	0	1475.66	A0A1D5P603	A0A1D5P603	1119	1130	no	2;3	1.13e-151	314.35	120350000000	165170	493950	438930	173340	691900	182890	1517200	269150	179680
ITVTEAEDAFINK	13	0	1449.74	A0A3Q3A7W0	A0A3Q3A7W0	95	107	yes	2;3	6.17e-159	313.96	13915000000	408980	762670	793420	139070	304700	262590	596090	574120	578580
LGFSEVEQVQMVVDGVK	17	0	1862.94	P00565	P00565	342	358	yes	2;3;4	9.71e-179	313.9	184630000000	1298000	2979100	2943800	1079400	1725300	2442200	2091700	3767900	3400700
IQSQTVAQGTDAHFR	15	0	1657.82	A6BM71;Q98918;Q9YH41;Q9IAR9	A6BM71	1811	1825	no	2;3	7.47e-94	313.32	20138000000	66489	91373	97404	102090	201710	166370	137310	107580	114910
TIGGGDDSFNTFFSETGAGK	20	0	2006.89	A0A1D5NW27;A0A1D5P198;A0A1D5NXV1;A0A1D5PA34;A0A1D5PAR5;F1NWX0	A0A1D5NW27	41	60	no	2;3	6.47e-115	313.31	3078100000	111020	214600	223320	46867	93031	112930	297870	247640	222670
AAFQQYEESSYR	12	0	1477.65	R4GMB6;P08836	R4GMB6	313	324	yes	2;3	1.29e-151	313.3	2054300000	79019	60537	70816	115760	168390	155340	116740	77190	90738
LAHDSIMDLENDKQQLDEK	19	1	2241.06	A0A1D5P525;Q9DGM4;A0A1D5P603;A0A1D5PUR6;A0A1D5NYC2;F1P3X1;P13538	P13538	1064	1082	no	2;3;4;5	7.96e-191	312.47	309500000000	2574200	3192100	3778600	1262600	1445900	2072300	1982400	3521100	3229800
EETITYDEWNR	11	0	1454.63	F1NX83;A0A1D5PF87	F1NX83	1317	1327	yes	2;3	4.14e-146	312.24	28003000000	274260	309570	301430	219950	267190	289490	248050	235600	240630
DLTIDDTSQIR	11	0	1275.63	A6BM71;A6BLM5	A6BM71	6226	6236	yes	2;3	4.16e-146	312.19	39584000000	274820	381810	428280	240080	477890	389580	374390	255710	294500
LSLCGEESFGTGSDHIR	17	0	1863.84	F1NN63;Q2UZR2	F1NN63	371	387	yes	2;3	1.2e-178	312.05	47453000000	829480	1542300	976970	431210	725630	809450	897440	509490	575340
DGQVLSAATLPGVQISFSDGR	21	0	2117.08	A6BM71;Q98918;A0A3Q2UG28;Q9IAR9	A6BM71	42	62	no	2;3	8.07e-204	311.43	2544800000	37158	65723	72308	33781	63421	71584	120540	157650	141520
SHVSDAVAQSTR	12	0	1256.61	P00940	P00940	194	205	yes	2;3;4	9.61e-79	310.53	350990000000	733150	536410	539550	698020	803700	716140	751960	560800	623610
DAGYEFDICFTSVQK	15	0	1778.78	Q5ZLN1;F1NHM9	Q5ZLN1	47	61	yes	2;3;4	6.87e-94	310.51	10564000000	501380	953360	812690	446090	657400	839340	602650	1516300	1241600
SSEISEPVFVEASPGTK	17	0	1762.86	F1NNW0;Q02173;A0A1D5PKV3	F1NNW0	886	902	yes	2;3;4	2.3e-90	310.29	97212000000	379620	857440	908980	271120	799540	660790	646200	530770	553020
EEISLLEDLNQVIENR	16	0	1912.97	A0A1D5PLW0;A0A1D5P984;Q90577	A0A1D5PLW0	627	642	no	2;3	3.28e-120	310.29	3266800000	31245	62485	62260	37531	43467	44954	163550	203720	198030
VLAENEYGIGLPVETSESVK	20	0	2133.08	A0A3Q2TS15	A0A3Q2TS15	1461	1480	yes	2;3;4	2.94e-183	309.29	43598000000	384120	720880	713970	312840	785200	641240	1118100	797800	811560
IGIFTEDEEVSGR	13	0	1450.69	P13585	P13585	639	651	yes	2;3	3.67e-101	309.21	330940000000	2361800	3013700	3120500	1432900	1959900	2227800	2113300	2043500	2214000
ADNFEYNDPVDGSVSR	16	0	1783.76	F1NN63;Q2UZR2	F1NN63	471	486	yes	2;3	8.38e-104	308.68	173620000000	752030	1145300	1393700	693180	1626300	1275000	1326200	1093000	1258100
AITDAAMMAEELK	13	0	1392.66	A0A1D5P525;Q9DGM4;A0A3Q2UHY4;A0A1D5P603;A0A1D5PUR6;A0A1D5NVW6;A0A1D5NYC2;A0A1D5P600;Q90WH5;F1P3X1;P02565;P13538;Q910C5;Q9DGM5;R4GIG1;A0A1D5NZY9;F1NM49;Q9IBD4;P29616;P79792;Q8UWA0;P79793;Q91411	P13538	1761	1773	no	2;3	1.54e-138	308.6	244770000000	2416500	5993800	6741700	1038300	2229000	2381700	2096700	1895700	2150100
AAYLMGLNSAELLK	14	0	1492.8	A0A1D5NYC2;P13538	P13538	387	400	no	2;3	1.11e-139	308.55	72554000000	590460	1245900	1318400	329540	488260	455540	729420	892450	837320
SNDPVATAVAEMLAENK	17	0	1758.85	Q9DEA4;H9KZU7;Q9PUQ7;A0A3Q2UAU4	Q9DEA4	230	246	yes	2;3	4.73e-158	308	8265000000	101330	282040	278630	33949	80656	96756	265510	286630	268270
ESAVLSWDVPDNDGGAPVK	19	0	1954.93	A0A3Q2TS15	A0A3Q2TS15	5728	5746	yes	2;3;4	7.57e-170	307.33	23485000000	370420	630650	597070	215050	481340	386160	638860	480410	519370
TGEYDFGAAFDGDGDR	16	0	1691.67	F1NN63;Q2UZR2	F1NN63	278	293	yes	2;3	4.11e-228	306.44	185070000000	1031800	1640100	1975800	665790	1366600	1328600	1194800	1042000	1138200
IVSNASCTTNCLAPLAK	17	0	1818.9	P00356;F1NH87	P00356	144	160	yes	2;3;4	2.34e-90	306	151260000000	845760	1313500	1251200	503030	1322200	792400	1642600	1321200	1205000
NLTEEMAALDETIVK	15	0	1675.83	A0A1D5P525;Q9DGM4;F1P3X1	A0A1D5P525	982	996	no	2;3	3.03e-67	305.95	87980000000	83297	301880	186460	192770	530690	988510	267570	263580	257780
ILAQMTGTEFMQDPDEEALR	20	0	2294.06	A0A1D5P909	A0A1D5P909	230	249	yes	2;3	1.49e-102	305.23	19537000000	355070	263510	276570	278190	136710	223520	287020	320980	356130
LSVEALNSLEGEFK	14	0	1534.79	P00565;A0A3Q2U6M6	P00565	157	170	yes	2;3;4	2.27e-72	305.11	288460000000	1554900	3677200	3951200	1265600	2697300	3018900	2928100	2715100	2785600
VNYENTATATILTINECTR	19	0	2183.05	A0A3Q2TS15	A0A3Q2TS15	548	566	yes	2;3	6.57e-90	305.1	3105300000	69234	56323	75680	128030	123870	150780	112680	138250	142680
TIYTVEDLTEDAFYEFK	17	0	2082.97	F1NNW0;Q02173;A0A1D5PKV3	F1NNW0	756	772	yes	2;3	2.57e-90	304.7	4573400000	106240	382230	158070	266620	388180	509540	97021	487780	403350
IVEPLEDIETMEK	13	0	1544.76	A6BM71;A6BLM5	A6BM71	6973	6985	yes	2;3	4.84e-138	304.69	99320000000	578360	1231900	1209600	507380	1358200	1019900	1724500	1265300	1304200
ATSSSSSSSTSLVR	14	0	1355.65	A0A3Q2U596;P14732	A0A3Q2U596	454	467	yes	2	4.74e-61	304.57	684270000	22879	18074	17111	13188	15941	16017	41784	22488	21621
AVNEMGEATTECR	13	0	1466.61	P16419	P16419	1113	1125	yes	2;3	5.67e-138	303.71	115120000000	579410	633910	671260	499830	907680	623210	1216000	883680	1010900
NVQAEEMVEFSSGLK	15	0	1666.79	A0A1L1RY35;A0A1D5PN54;A0A175KE65;A0A1D5PJG9;A0A1L1RZJ6;A0A182C637;A0A1D5P3S4	A0A1L1RY35	89	103	no	2;3	5.18e-147	303.04	7247800000	81938	176220	190260	219540	338180	362900	530580	471500	482950
VSHVSTGGGASLELLEGK	18	0	1739.91	F1NU17;P51903	F1NU17	389	406	yes	2;3;4	2.02e-101	302.73	37733000000	996890	1346600	1502200	857030	1165300	1277000	1406300	1551700	1483800
ICDQWDSLGTLTQK	14	0	1663.79	R9PXQ0;P20111;A0A1L1S0L2;A0A1D5PNV5	R9PXQ0	489	502	yes	2;3	4.62e-139	302.58	76672000000	362480	667660	671060	101610	172670	186930	723140	726470	650810
YGTGPAITSESVVANYPFK	19	0	1999.99	A0A3Q2TS15	A0A3Q2TS15	675	693	yes	2;3;4	5.71e-79	302.28	13453000000	189110	424790	441230	109080	247930	226570	315620	258000	248660
GCITIIGGGDTATCCAK	17	0	1753.78	F1NU17;P51903	F1NU17	366	382	yes	2;3;4	2.66e-78	301.93	81582000000	1388100	2275500	2334300	1030400	2130100	1943700	3054200	2691400	2703200
SDSGTYIIEAVNSSGR	16	0	1654.78	A6BM71;A6BLM5	A6BM71	7993	8008	yes	2;3	3.45e-77	301.74	26787000000	221640	380380	380650	153920	339750	304130	353900	301440	303600
LQDAEEHVEAVNAK	14	0	1551.75	A0A1D5P525;Q9DGM4;A0A1D5PUR6;A0A1D5NVW6;A0A1D5NYC2;F1P3X1;P13538;Q9DGM5	P13538	1400	1413	no	2;3;4	6.78e-122	301.35	1239500000000	5823900	9714800	10108000	5886100	13034000	11208000	10992000	8963600	9748900
IGGGEDVAWLQITEPTEK	18	0	1941.97	F1NNW0;Q02173;A0A1D5PKV3	F1NNW0	1267	1284	yes	2;3;4	2.12e-101	301.07	14503000000	167980	331660	320050	329080	538960	690120	264060	292920	288270
SDQLTDSSEITLMPSDIER	19	0	2135.99	F1NCA2	F1NCA2	609	627	yes	2;3	2.42e-169	300.51	5426700000	116900	161050	162980	117740	306790	232720	188440	141820	145200
YVTVQGISGTGSLR	14	0	1436.76	F1P180;A0A1L1RPR4;P00508	F1P180	119	132	yes	2;3	6.32e-139	299.69	2503700000	45912	77348	86344	6171	12471	11875	179620	156700	156480
DSITLQWDMPLIDGGSR	17	0	1902.91	A0A3Q2TS15	A0A3Q2TS15	318	334	yes	2;3	1.48e-255	299.64	761170000	158740	458140	419670	0	0	0	81402	115870	106540
VITNTTSNTDFTER	14	0	1597.76	A0A1D5P909	A0A1D5P909	108	121	yes	2;3	6.61e-139	299.2	81629000000	369590	540970	666880	315230	662890	507690	731490	495070	545470
DSNLMIEDQSYK	12	0	1441.64	F1N9Z6;A0A1D5PSF9;Q90724	F1N9Z6	146	157	yes	2;3	6.41e-64	298.84	28245000000	289480	671620	746670	173390	598530	427420	777940	580110	656610
FAGEAGGYQDTIAR	14	0	1454.68	E1BZ05;P02542;O73665	E1BZ05	348	361	yes	2;3	1.9e-73	298.84	15843000000	246490	342960	364740	236680	441170	447230	494630	382950	345510
DFVMTEVENGGMLGSK	16	0	1712.78	A0A1D5P9V0;P00548;F1NW43	A0A1D5P9V0	210	225	no	2;3;4	5.07e-139	298.78	59504000000	566650	766330	610480	394700	737180	945240	844580	1011600	1005300
TSIAIDTIINQK	12	0	1315.73	A0A1L1RY35;A0A1D5PN54;A0A175KE65;Q8UVX3;Q9DDH7;A0A1D5PJG9;A0A1L1RZJ6;A0A182C637;A0A1D5P3S4	A0A1L1RY35	219	230	no	2;3	4.94e-64	298.77	6980800000	121140	279460	313920	41489	111110	100590	128400	102540	99541
DGLPAGAGVGGAGLAGAGAVGSPYGK	26	0	2126.08	A0A1D5PUM7;E1C7I7	A0A1D5PUM7	812	837	no	2;3;4	9.21e-124	298.13	26220000000	364430	734500	795130	108290	281690	239490	774100	809800	668920
LASADIETYLLEK	13	0	1464.77	A0A1D5P525;Q9DGM4;A0A1D5P603;A0A1D5PUR6;A0A1D5NVW6;A0A1D5NYC2;A0A1D5P600;A0A1D5PFB7;A0A1D5NXZ4;F1P3X1;P02565;P13538;Q910C5;Q9DGM5;R4GIG1	P13538	261	273	no	2;3	3.85e-119	297.52	402450000000	1959800	3996200	3886500	1138800	2056600	2298200	3513300	3791200	3682400
VSNEAGSVLCTSSVVIR	17	0	1776.9	A6BM71;Q08476	A6BM71	4295	4311	yes	2;3	9.16e-139	297.45	10077000000	107190	171530	169980	54037	109400	101190	286330	223760	228690
LLDEEETTDNELR	13	0	1575.73	Q5ZJ70;A0A1D5PLK6	Q5ZJ70	461	473	yes	2;3	4.66e-119	297.2	1549300000	25890	29665	33348	33962	60078	47673	56572	42231	44398
YTSVVDSPDILLAK	14	0	1519.81	A0A3Q3A4C6;A0A1D5NY50	A0A3Q3A4C6	267	280	yes	2;3	6.17e-60	297.2	15516000000	284570	577370	492880	355810	653920	640290	485220	449480	453660
NAYEESLDHLETLK	14	0	1660.79	A0A1D5P525;A0A1D5P603;A0A1D5PUR6;A0A1D5NVW6;A0A1D5NYC2;F1P3X1;P02565;P13538;Q9DGM5;R4GIG1	P13538	1489	1502	no	2;3;4	3.53e-120	297.05	926860000000	1560500	4100700	4742400	1622400	3987000	5063100	4992500	4037500	4970600
ENQSILITGESGAGK	15	0	1502.76	A0A1D5P525;Q9DGM4;A0A1D5P603;A0A1D5PUR6;A0A1D5NVW6;A0A1D5NYC2;A0A1D5P600;A0A1D5PFB7;A0A1D5NXZ4;F1P3X1;P02565;P13538;Q910C5;Q9DGM5;R4GIG1	P13538	172	186	no	2;3;4	2.71e-129	296.97	698460000000	3218800	5815900	6046500	1949100	4529300	3604100	5631000	4452700	4632300
MEAPDLDLDMELR	13	0	1546.7	A0A3Q2TS15	A0A3Q2TS15	2373	2385	yes	2;3	6.07e-119	296.65	9570800000	350290	551150	555500	222190	350320	352260	552460	465560	506140
VENLTEGAIYYFR	13	0	1573.78	A0A3Q2TS15	A0A3Q2TS15	3612	3624	yes	2;3	6.41e-119	296.52	3368700000	312970	440450	398030	204210	188610	277420	174030	348080	291540
VLASGPGLSPSGVPASLPVEFAIDAR	26	0	2506.34	Q90WF0	Q90WF0	1529	1554	yes	2;3	8.39e-115	296.47	1558700000	15474	22824	23633	5672.5	7239.7	10741	47455	48701	42043
LADVASNDSSDSLETR	16	0	1678.76	Q6B344;A0A1D5PY67;E1BWX1	Q6B344	530	545	yes	2;3	5.61e-138	296.22	14133000000	161250	117330	127850	107790	135240	106570	204170	124420	147610
VLNASAIPEGQFIDSK	16	0	1687.88	A0A1D5P525;Q9DGM4;A0A1D5P603;A0A1D5PUR6;A0A1D5NVW6;F1P3X1;P02565;Q9DGM5;R4GIG1	A0A1D5PUR6	728	743	no	2;3;4	2.72e-77	296.22	105290000000	341700	1172100	773670	316330	941280	1432600	1897700	885060	765970
LNFEVFPDTTYESTK	15	0	1789.84	P16419	P16419	680	694	yes	2;3;4	1.6e-67	295.86	44348000000	297150	634680	623330	217450	486060	490580	336570	330420	340360
VQNAVITVPAYFNDSQR	17	0	1920.97	Q7SX63;B3VHV2;B6EAX2;D6PVB7	Q7SX63	140	156	yes	2;3	1.86e-138	295.83	3156000000	7418.7	17058	16548	27423	56059	63185	33489	29016	29476
FCGWYDADLSPAGQQEAR	18	0	2069.89	Q5ZLN1;F1NHM9	Q5ZLN1	22	39	yes	2;3	9.01e-150	295.78	125870000000	647420	1252900	1383200	423820	759290	934570	1276800	1464900	1392900
NCQLEDQGNYR	11	0	1395.58	A6BM71;Q08476;A6BLM8	A6BM71	4687	4697	no	2;3	2.49e-106	295.34	30681000000	149700	322150	312310	120910	324180	249560	282650	209060	225850
DGGAYTLTATNPGGFAK	17	0	1639.78	A0A3Q2TS15	A0A3Q2TS15	964	980	yes	2;3	2.45e-138	294.81	13337000000	268300	491040	520520	157930	375040	309290	474140	372270	369600
ADEDEWSLVTPQTGIR	16	0	1815.86	A0A3Q2TS15	A0A3Q2TS15	3397	3412	yes	2;3	3.78e-77	294.69	44615000000	298640	478860	476110	196480	345620	323510	348300	299650	308900
AVEGAGTDESTLIEIMATR	19	0	1962.96	Q6B344;A0A1D5PY67;E1BWX1	Q6B344	445	463	yes	2;3	3.79e-150	294	6516300000	229610	290580	299320	223840	292130	356120	236180	240620	238390
QKYEETQTELEASQK	15	1	1810.86	A0A1D5PUR6;A0A1D5NYC2;P13538	P13538	1461	1475	no	2;3;4	4.03e-148	293.96	519290000000	3577600	8659200	8840400	2684700	8918500	6584800	8263700	7003500	6914200
ATDCEGEDVVYLLR	14	0	1638.76	F1NZJ2;Q5F3F7;Q8AYP8	Q8AYP8	625	638	no	2;3	1.32e-59	293.8	3205500000	127770	165580	142690	168530	191250	210660	110440	107820	112050
ECQTLVSDVDYR	12	0	1483.66	A0A3Q3A4C6;A0A1D5NY50;Q9DEG5;Q9DEG4	A0A3Q3A4C6	182	193	no	2;3	1.09e-111	293.71	58804000000	411220	540640	571050	406730	771610	629380	654500	485890	539760
FAAYFQQGDMESNGK	15	0	1691.72	F1NIJ6;Q5ZMU3;A0A1L1RQ91;A0A1L1RPE8;A0A1D5PRS4	F1NIJ6	319	333	yes	2;3	1.64e-127	292.35	6813400000	146550	327420	163140	187820	430120	526810	463350	554620	489070
VGEATETALTCLVEK	15	0	1619.81	P13585;Q03669;A0A1L1RKB7;A0A3Q2UHS6;Q9YGL9;F1NNV0	P13585	437	451	no	2;3;4	1.7e-127	292.08	236040000000	1019000	2536400	2594600	814880	1919800	1821500	3327500	2857100	2978400
TDETDWTTAIQNLR	14	0	1662.78	A0A3Q2TS15	A0A3Q2TS15	5561	5574	yes	2;3	1.24e-119	292.06	5845800000	127740	290570	290710	123030	236200	310610	377850	408590	405380
NADGFIDIEELGEILR	16	0	1802.9	P02588	P02588	109	124	yes	2;3	9.27e-78	291.75	25988000000	89614	318680	237480	795990	1147000	1856300	170760	873640	633270
VIGSGCNLDSAR	12	0	1247.59	P00340;E1BTT8;A0A1D5NZ01	P00340	158	169	yes	1;2;3	1.59e-111	291.24	383650000000	1105100	1788100	1963200	729270	1718200	1286100	1851500	1284500	1426200
ANLLQAETEELR	12	0	1385.72	A0A1D5P603	A0A1D5P603	1682	1693	no	2;3	7.8e-52	291.24	231410000000	468120	749780	719240	487520	880780	463630	2321000	772780	689260
ATGEHVTEEDIEDLMK	16	0	1815.82	P02588	P02588	125	140	yes	2;3;4	4.55e-138	291.13	419320000000	1453600	2009200	3090600	1477200	1690000	2594500	1984600	1929400	2107000
GNDVGSGTVLSDYVGSGPPK	20	0	1904.91	A0A1L1S091	A0A1L1S091	92	111	yes	2;3;4	1.03e-102	291	11864000000	208990	308270	350220	135860	292950	297780	661010	504800	567340
VTVVQEADTVEICGALK	17	0	1830.94	A0A3Q8WI14	A0A3Q8WI14	188	204	yes	2;3	4.85e-138	290.65	8018700000	893090	1376900	1224600	430930	719220	791140	1384300	1613000	1582900
ELTYQSEEDRK	11	1	1396.65	A0A1D5P525;A0A1D5P603;A0A1D5PUR6;A0A1D5NVW6;F1P3X1;P02565;Q9DGM5;R4GIG1	A0A1D5PUR6	1853	1863	no	2;3;4	1.08e-89	290.48	287330000000	493930	2098300	1250100	676760	1994800	2909900	2483200	942690	876350
AVNAVGFSENSQESEAIK	18	0	1878.9	F1NNW0;Q02173;A0A1D5PKV3	F1NNW0	674	691	yes	2;3;4	1.38e-89	290.32	32373000000	496030	768740	801770	515400	1056700	874370	1420900	1222800	1234900
QASFTNFDPTGLLPPCR	17	0	1919.92	P07630	P07630	172	188	yes	2;3	3.79e-67	289.72	1880100000	94350	158060	149660	83991	137370	179930	81937	63137	65854
GTEDELDKYSESLKDAQEK	19	2	2184.01	P04268;F1NM23;A0A1D5P342;A0A1D5NVL7;Q91968;A0A1D5PSX3;A0A1L1RVF2;Q90740	P04268	52	70	no	3;4;5	1.88e-150	289.61	265850000000	959240	2598800	2514600	570150	2167700	1519100	2837800	2829600	2320900
VAEQELLDASER	12	0	1358.67	A0A1D5P603;P02565;R4GIG1	A0A1D5P603	1705	1716	no	2;3	1.93e-111	289.59	138380000000	126610	196880	164020	131670	356530	57379	891200	164040	123340
VMIEMDGTENK	11	0	1265.56	P07322	P07322	93	103	yes	2;3	6.45e-106	289.46	706580000000	7136500	12721000	14027000	4999400	12508000	10081000	12304000	9695200	10600000
GQTVSQVHNSVGALAK	16	0	1594.84	A0A1D5NYC2;P13538	P13538	417	432	no	2;3;4	1.09e-89	288.77	175840000000	1694500	1711900	1920900	1078000	1105400	908310	1132600	960300	1069200
VLNASAIPEGQFMDSK	16	0	1705.83	A0A1D5NYC2;P13538	P13538	727	742	no	2;3;4	3.76e-77	288.77	504480000000	2280000	4174600	4588800	1873900	4258100	3406800	5781200	5481500	5484500
SINPDEAVAYGAAVQAAILSGDK	23	0	2259.14	A0A1D5PYK0;A0A1D5PFJ6;F1NWP3;A0A1L1RPG0;O73885	A0A1D5PYK0	362	384	no	2;3;4	2.94e-178	288.55	16653000000	183930	390290	372920	89495	172390	193750	258430	270220	232850
TTGLEEGLEYEFR	13	0	1542.72	A0A3Q2TS15	A0A3Q2TS15	1838	1850	yes	2;3	2.68e-118	288.49	65855000000	224230	395930	384550	211820	355870	405050	339450	347370	347570
GLSELALETPDFVR	14	0	1545.8	A0A3Q3A4C6;A0A1D5NY50;Q9DEH4	A0A3Q3A4C6	2377	2390	no	2;3	8.55e-50	288.11	18737000000	120400	157770	163070	218390	248690	300760	394680	517060	478510
RGTGGVDTAAVGAVFDISNADR	22	1	2148.06	P00565	P00565	320	341	yes	2;3	5.22e-130	288	28425000000	104200	159940	188340	46210	107490	107010	164930	180200	163020
VQLLHTQNTSLINTK	15	0	1708.95	A0A1D5P525;Q9DGM4;A0A1D5P603;A0A1D5PUR6;A0A1D5NVW6;A0A1D5NYC2;F1P3X1;P02565;P13538;Q9DGM5;R4GIG1	P13538	1716	1730	no	2;3;4	2.71e-127	287.96	137880000000	967900	1926300	2442600	403490	619660	777810	1041500	1175400	1106700
TNPGSVFDYDPAEDNIQSR	19	0	2123.94	Q9DEH4;A0A3Q2U8G4	Q9DEH4	2234	2252	yes	2;3	9.39e-71	287.88	41237000000	230400	376710	397460	193150	356620	284120	256440	210190	215070
ALQEAHQQTLDDLQVEEDKVNTLTK	25	1	2865.44	A0A1D5NYC2;P13538	P13538	1001	1025	no	3;4;5	1.53e-178	287.14	31117000000	84204	184510	255640	92466	201390	241340	203260	296360	299610
TGTLTTNQMSVCK	13	0	1439.67	P13585	P13585	353	365	yes	2;3	1.41e-58	286.73	52408000000	357360	894310	891900	183830	720950	459040	797330	551120	553290
AIFVDLEPTVIDEVR	15	0	1714.91	A0A1D5NXV1;A0A1L1RJP8;P09644	A0A1D5NXV1	65	79	no	2;3	6.67e-57	286.73	1999300000	70158	107560	83190	119480	127130	154460	143650	204200	181610
TSGLLTVIEEEAVFTK	16	0	1735.92	A6BM71;A6BLM5	A6BM71	6689	6704	yes	2;3	3.98e-77	286.65	2040800000	26750	100650	57795	136190	233030	351850	45400	126360	102820
FPDAETASAIAELGCK	16	0	1678.79	A0A1D5P5M6;E1BQD1	A0A1D5P5M6	185	200	yes	2;3	3.62e-67	286.61	3901700000	161360	270820	298880	217100	228270	240780	415380	330450	326770
DIDDLELTLAK	11	0	1244.65	A0A1D5P525;A0A1D5P603;A0A1D5PUR6;A0A1D5NVW6;A0A1D5NYC2;F1P3X1;P02565;P13538;Q9DGM5;R4GIG1	P13538	956	966	no	1;2;3	2.69e-89	286.53	1009400000000	5165800	11639000	11434000	3349300	8737300	7620900	8304900	7048900	7158200
TLTIVDTGIGMTK	13	0	1348.73	P11501;A0A1D5PUL6;A0A1D5P5R0;A0A1L1RND0;Q5ZIC0;Q2XQE5;Q5ZKZ3;Q5ZMA5	P11501	87	99	yes	2;3	1.89e-58	286.45	3123700000	130350	297080	248670	82046	171560	168340	59604	60597	51158
AGTQIENIEEDFR	13	0	1520.71	P05094;A0A1D5PF13;A0A1D5P9P3;A0A1D5P522;Q5ZIW4;A0A1D5PBQ2;Q5ZJN7;R9PXQ0;P20111;A0A1L1S0L2;A0A1D5PNV5	R9PXQ0	58	70	no	2;3	1.89e-101	285.83	242280000000	611520	657000	644700	645020	932340	945600	796730	672260	749620
DTGTYEDFVEGLR	13	0	1500.67	F1P5V6;P02606	F1P5V6	125	137	yes	2;3	1.89e-101	285.83	15974000000	38036	66918	37823	76742	573160	91856	100360	93378	97506
SITVSEGETAR	11	0	1148.57	P79757	P79757	336	346	yes	2	4.6e-89	285.74	32950000000	447160	558170	578860	316340	715450	502100	822830	533820	611800
LEQQVDDLEGSLEQEKK	17	1	1986.97	A0A1D5P525;Q9DGM4;A0A1D5P603;A0A1D5PUR6;A0A1D5NVW6;A0A1D5NYC2;F1P3X1;P02565;P13538;Q9DGM5;R4GIG1;F1NM49;Q9IBD4;P29616	P13538	1030	1046	no	2;3;4;5	9.55e-105	285.58	666830000000	1584200	4526700	4407600	1201900	4511900	4012300	3362700	2799800	2715700
LGDVYVNDAFGTAHR	15	0	1633.78	F1NU17;P51903	F1NU17	157	171	yes	2;3	2.61e-110	284.92	88153000000	329460	480300	547960	195400	339730	368130	621320	700900	682520
YTSVVDTPDIVLAK	14	0	1519.81	A0A3Q3A4C6;A0A1D5NY50;Q9DEG5;Q9DEH4;Q9DEG4	A0A3Q3A4C6	753	766	no	2;3	6.11e-49	284.73	14509000000	270280	580780	568680	221310	566070	474400	546540	463760	473430
VSAENAAGLGEPSQVSPYFK	20	0	2050	A0A3Q2TS15	A0A3Q2TS15	3329	3348	yes	2;3;4	6.44e-83	284.53	24885000000	118910	212170	206500	125070	233630	211550	496880	403070	394870
LEEAGGATAAQIDMNK	16	0	1617.77	A0A1D5P525;Q9DGM4;A0A1D5P603;A0A1D5PUR6;A0A1D5NVW6;P02565;R4GIG1	A0A1D5PUR6	1154	1169	no	2;3;4	1.18e-91	284.24	290630000000	1330600	2992300	1686100	1418600	3291700	4435000	4867300	1991700	1944500
LDMTGEVSFQAANAK	15	0	1580.75	A6BM71;A6BLM5	A6BM71	6051	6065	yes	2;3	3.38e-110	284.12	6036500000	264080	434740	433630	159860	341650	319270	412910	329560	334090
NDLQLQVQAEADALADAEER	20	0	2198.05	A0A1D5P603;A0A1D5NVW6;F1P3X1;Q9DGM5	A0A1D5P603	889	908	no	2;3	1.62e-145	283.83	28659000000	119130	180740	201650	99854	197180	159140	668590	256710	252260
EEFLDGDSWTQR	12	0	1481.64	Q6EE32;A0A1D5P0U5	Q6EE32	27	38	yes	2;3	1.13e-51	283.58	3275500000	175550	252690	296670	76248	122710	138640	126640	125690	116270
DSMVVQWNEPVNDGGSK	17	0	1860.83	A0A3Q2TS15	A0A3Q2TS15	1791	1807	yes	2;3;4	2.2e-58	282.91	22019000000	208030	330410	321840	279060	425590	356730	382190	307890	313180
ESIFCIQYNVR	11	0	1427.69	A0A1D5P525;Q9DGM4;A0A1D5PUR6;A0A1D5NVW6;A0A1D5NYC2;P02565;P13538;R4GIG1	P13538	812	822	no	2;3	1.44e-46	282.72	7994400000	91631	178210	109620	168580	172140	221950	66325	187080	144530
LAHDSIMDLENDK	13	0	1499.69	A0A1D5P525;Q9DGM4;A0A1D5P603;A0A1D5PUR6;A0A1D5NYC2;F1P3X1;P13538	P13538	1064	1076	no	2;3;4	6.36e-39	282.68	94652000000	817960	1141200	1195200	754360	759590	1048500	702690	705740	789650
EPADAMAAGAVEASFK	16	0	1563.72	A0A1D5P9V0;P00548	A0A1D5P9V0	426	441	yes	2;3;4	2.72e-77	282.62	408330000000	2238100	2840300	2897600	1574800	3112700	2428700	4550600	3417800	3768600
YSPEEIAMATVTALR	15	0	1650.83	R4GM10;P53449	R4GM10	244	258	yes	2;3	5.04e-48	282.21	172770000000	403550	800350	761410	416760	648450	919230	595510	720750	666070
STYLTSEPVVAQYPFK	16	0	1828.92	A0A3Q2TS15	A0A3Q2TS15	1760	1775	yes	2;3;4	9.04e-67	281.99	16976000000	105000	249000	249760	47262	134130	106940	174970	157300	148830
DLYANNVLSGGTTMYPGIADR	21	0	2227.06	P08023;F1P476;P63270;A0A3Q3AWV3;P68034;A0A1L1RU07	P68034	294	314	no	2;3	1.81e-76	281.49	10198000000	92163	149690	145680	125570	250340	237210	203030	204170	190480
VVVVGNPANTNCLIASK	17	0	1754.93	Q5ZME2;A0A452J7S4;A0A1D5PE17	Q5ZME2	126	142	yes	2;3	1.36e-120	281.48	7543700000	97318	159170	181670	14118	36273	31093	118810	85726	96805
DTQIHLDDALR	11	0	1295.65	A0A1D5P525;Q9DGM4;A0A1D5P603;A0A1D5PUR6;A0A1D5NVW6;A0A1D5NYC2;F1P3X1;P02565;P13538;Q9DGM5;R4GIG1	P13538	1655	1665	no	2;3	1.51e-88	281.41	1447400000000	3571200	5003700	5416600	2544500	4071000	4366600	4210400	3779000	3924800
LQTEIEDLSVDLER	14	0	1658.84	A0A1D5NZY9;Q8UWA0;P79793	A0A1D5NZY9	1429	1442	no	2;3	3.57e-142	281.38	1984700000	0	0	0	8046.3	73729	11147	75602	65532	64230
DCISQDEMFSDIYK	14	0	1749.72	P43347	P43347	6	19	yes	2;3	1.38e-59	281.12	12799000000	314080	663990	763380	207110	457310	408290	615490	523630	566520
ANVGIGDVVLTIDGISTDGMTHLEAQNK	28	0	2867.43	A0A3Q2U6G6;A0A1D5P8X3;Q5F3G1;F1NTC8;A0A3Q2UJ04	A0A3Q2U6G6	42	69	no	3;4	2.12e-196	280.92	6030900000	117340	184180	198930	62432	69162	128250	49439	139180	136620
NAGGAVSQPSEPSDAITCR	19	0	1915.87	A0A3Q2TS15	A0A3Q2TS15	871	889	yes	2;3	9.47e-79	280.62	47561000000	98460	194620	194480	81981	257080	217410	172790	123950	134610
CVANEDAPECSKPLPSIILDEICQVEK	27	1	3113.47	A0A1D5NW68;P19121	A0A1D5NW68	30	56	no	3;4;5	6.55e-196	280.47	32980000000	192960	555240	616840	162210	376710	818000	267440	428760	359900
ALSSMGASYSSYLAK	15	0	1534.73	A0A1L1RXW8;P12620;A0A3S5ZPU4;Q7ZZH5;O57559	A0A1L1RXW8	110	124	no	2;3	1.31e-56	280.21	10937000000	233700	512110	688280	21295	46604	58305	273980	265540	263820
HCVVTDESVYSFK	13	0	1569.71	A6BM71;Q98918	A6BM71	2495	2507	yes	2;3;4	7.92e-101	280.03	10432000000	149460	334680	352880	115910	232810	254260	242450	281370	265790
LEQNQPIDDMIPAQK	15	0	1738.86	P00565	P00565	367	381	yes	2;3;4	7.65e-57	279.77	152470000000	985840	1754700	1780700	552920	1209000	1094300	1910900	1507700	1594200
SNYTLTDTPQLDMAR	15	0	1724.8	A0A3Q3A4C6;A0A1D5NY50;Q9DEG5;Q9DEH4	A0A3Q3A4C6	542	556	no	2;3	7.65e-57	279.77	18909000000	79394	148990	140030	141680	400310	313340	289530	252590	241070
GDSGQYVLTLQNVAGTR	17	0	1777.9	A0A3Q2TS15	A0A3Q2TS15	5291	5307	yes	2;3	1.18e-58	279.55	14329000000	155690	212050	221390	234330	374480	368280	440710	369050	377850
EATESFASDPITYR	14	0	1585.73	A0A1D5P9V0;P00548;F1NW43	A0A1D5P9V0	112	125	no	2;3	6.64e-102	278.51	72300000000	514800	834200	919080	230080	445110	423160	548520	422650	486970
NAVTSDNGLYTLDTGLCSSR	20	0	2142.99	A0A1D5PUM7;E1C7I7	A0A1D5PUM7	154	173	no	2;3	3.94e-145	278.39	2680700000	93075	164810	175490	70503	162730	156310	145150	170430	157410
GDPGPVGPVGPAGAFGPR	18	0	1603.81	P02467	P02467	978	995	yes	2;3	1.16e-131	278.38	4528000000	76714	152820	339130	103370	234550	353020	117210	91995	131270
YDGGSSINNYIVEK	14	0	1557.73	A0A3Q2TS15	A0A3Q2TS15	1703	1716	yes	2;3	6.81e-102	278.27	13488000000	151250	322750	300590	207980	467870	435550	386210	307150	323980
VYAENAAGLSLPSQSTPLIR	20	0	2086.11	A0A3Q2TS15	A0A3Q2TS15	5493	5512	yes	2;3	4.14e-145	277.94	10767000000	52377	106900	88725	34188	58740	69913	87895	55727	54848
YTPVLDTPILIR	12	0	1399.81	A0A3Q3A4C6;A0A1D5NY50;Q9DEH4	A0A3Q3A4C6	1596	1607	no	2	9.58e-94	277.31	3522100000	74430	145930	135520	13857	18997	28378	45664	53581	44490
LGIYDADGDGDFDVEDAK	18	0	1913.82	A0A1D5PAN4;A0A3Q2U926;A0A1D5NWS0;A0A3Q2U4L5	A0A1D5PAN4	73	90	no	2;3	2.15e-69	276.97	15273000000	230190	643050	732360	216920	809680	593460	487540	356800	417970
NLTEEMAALDETIAK	15	0	1647.8	A0A1D5NVW6;P02565;Q9DGM5;R4GIG1	A0A1D5NVW6	985	999	no	2;3	1.06e-56	276.97	22474000000	34214	48824	46143	107330	105280	2246700	768160	95503	181620
GIGWLTEGSVDVVK	14	0	1458.77	Q9DEG4	Q9DEG4	435	448	yes	2;3	4.72e-49	276.95	1835300000	170740	364250	322250	46599	61313	85486	136730	256090	218240
VVLAYEPVWAIGTGK	15	0	1601.88	P00940	P00940	160	174	yes	2;3	7.5e-48	276.95	16347000000	108700	215100	147680	177030	152480	293040	129170	223720	182920
KLETDIVQIQSEMEDTIQEAR	21	1	2475.22	A0A1D5NYC2;P13538	P13538	1732	1752	no	2;3;4	5.5e-146	276.79	543600000000	917380	1546100	1872200	479510	613050	819240	667280	1574900	1393200
TIGGGDDSFTTFFCETGAGK	20	0	2066.89	A0A1L1RJP8;F1NW97;P09644	A0A1L1RJP8	92	111	yes	2;3	4.53e-83	276.45	5934600000	192890	406050	417030	126510	218790	261940	292280	346580	295370
ETVSEESNVMCLSK	14	0	1611.71	Q90705;A0A1D5PS29	Q90705	581	594	yes	2;3	5.54e-49	276.41	3011300000	58960	81264	88597	118730	202400	159500	199090	144020	159950
QEYDEAGPSIVHR	13	0	1499.7	P08023;F1P476;P68034;P68139;A0A1L1RPH2;A0A1D5PK53	P68139	362	374	no	2;3	1.18e-100	276.35	1139800000000	2234400	2617500	2810700	3601500	3999700	3920000	4609100	3555900	4154300
VLDTPSAPVNLTVR	14	0	1480.82	A0A3Q2TS15	A0A3Q2TS15	4631	4644	yes	2;3	2.76e-141	276.2	17139000000	56123	94021	87580	129550	278430	246540	68218	57655	59610
RANLLQAEVEELR	13	1	1539.84	A0A1D5NYC2;P13538	P13538	1680	1692	no	2;3	1.52e-39	276.17	76834000000	464420	670040	742310	487850	563870	655250	350180	408490	390910
EVTLDDISEIK	11	0	1260.64	A6BM71;A6BLM5	A6BM71	5871	5881	yes	2;3	1.56e-74	276.13	50075000000	756730	1304600	1290200	472130	1084100	879310	1222200	908140	984450
GYTLGPNDVGFENVK	15	0	1608.78	A0A3Q3A4C6;A0A1D5NY50;Q9DEH4	A0A3Q3A4C6	1350	1364	no	2;3	1.04e-95	276.12	18120000000	283620	475570	457860	107720	216310	190220	470660	408240	505470
YCVTVENSTGSR	12	0	1371.61	Q07784	Q07784	234	245	yes	2	5.61e-96	275.57	11952000000	390370	329090	305820	559380	508040	400920	400720	285250	311810
DVMLEELSLLTNK	13	0	1503.79	E1BU93	E1BU93	43	55	yes	2;3	4.48e-40	275.57	6084800000	210940	524610	421020	200810	357010	451850	321390	533340	470790
SMPTSGALDR	10	0	1033.49	F1NN63;Q2UZR2	F1NN63	334	343	yes	2	1.94e-69	275.44	143470000000	566720	844170	978940	493690	1039900	808760	954030	698620	790820
ALQEAHQQALDDLQAEEDKVNTLTK	25	1	2807.39	A0A1D5NZY9;Q8UWA0	A0A1D5NZY9	1006	1030	no	3;4;5	1.8e-162	275.42	11185000000	0	0	0	368480	470870	546350	155070	161090	175680
VLDTPSAPVNLK	12	0	1252.7	A0A3Q2TS15	A0A3Q2TS15	2466	2477	yes	2;3;4	6.47e-79	275.28	27000000000	194390	344400	350900	114980	279930	208030	443570	315830	340460
QEISPFDVEEICPISR	16	0	1917.91	F1P0N2	F1P0N2	35	50	yes	2;3	7.93e-105	275.23	8107600000	242070	388890	269130	117730	258870	298740	337580	222460	225610
EEAENNLAAFR	11	0	1262.59	E1BZ05;O73665	E1BZ05	194	204	yes	2;3	2.4e-36	275.01	21798000000	102700	143800	146790	151680	243580	260420	181760	133840	123510
DSAVLSWEPPIIDGGAK	17	0	1753.89	A0A3Q2TS15	A0A3Q2TS15	3566	3582	yes	2;3	5.61e-58	274	9452000000	159860	410450	381330	60569	158500	148780	333240	312360	300810
GNPTVEVDLYTNK	13	0	1448.71	A0A1D5PSH6;A0A1L1RQQ0;A0A1L1RKH8;A0A1L1RNS0;P51913;F1NZ78;Q5ZIQ4	A0A1L1RQQ0	16	28	no	2;3	1.87e-85	274	11191000000	127620	207850	214520	191290	389860	342390	452400	338170	331700
EVNISGITDTEEER	14	0	1590.74	F1N9Z6;A0A1D5PSF9;Q90724	F1N9Z6	190	203	yes	2;3	1.47e-86	273.72	54798000000	231740	188870	200560	257510	442370	421630	453460	274940	241920
ISAENEYGIGLPAETSDPIK	20	0	2103.04	A0A3Q2TS15	A0A3Q2TS15	2543	2562	yes	2;3;4	8.95e-83	273.39	33968000000	411650	825980	830910	376740	1026200	772130	1152800	799190	830800
FTQAGSEVSALLGR	14	0	1434.75	Q5ZLC5;A0A1L1RY04	Q5ZLC5	316	329	yes	2;3	8.12e-50	273.07	6127700000	54783	96652	127430	108590	148630	171790	44121	41336	39130
VLGGLPDVVTIQEGK	15	0	1523.86	F1N9Z6;A0A1D5PSF9;Q90724	F1N9Z6	1480	1494	yes	2;3	2.51e-94	273.04	15287000000	189390	367280	386190	162530	433880	371160	380770	345810	376970
QAASIAAIGSACDLNLK	17	0	1701.87	Q90WF0	Q90WF0	2084	2100	yes	2;3	6.17e-67	272.97	4577900000	34063	66898	67411	117350	257970	264130	124900	92880	78192
ETANFDTEISEEDIPGEWK	19	0	2208.97	A6BM71;A6BLM5;A6BM73;A6BLM8	A6BM71	5649	5667	no	2;3	6.92e-63	272.96	20776000000	230160	596910	631020	157680	451350	405390	497310	408010	421890
DDPIGNINLAMEIAEK	16	0	1741.86	R9PXQ0;P20111;A0A1L1S0L2;A0A1D5PNV5	R9PXQ0	209	224	yes	2;3	8.52e-67	272.72	21660000000	328190	859000	930670	198190	407150	549040	414610	426950	437440
DQGTFEDFVEGLR	13	0	1511.69	P02604;P02605;F1NZG0	P02604	123	135	no	2;3	1.68e-120	272.65	1049700000000	2667400	4545400	5181900	1771100	2458000	3790000	2405400	3395200	3052300
DTSTTTWQIVSATVAR	16	0	1735.87	A0A3Q2TS15	A0A3Q2TS15	1718	1733	yes	2;3	2.89e-104	272.5	2262100000	84613	153190	152620	11981	21023	19198	129260	143670	123740
DSCSFSIDVEAPR	13	0	1481.65	P16419	P16419	141	153	yes	2;3	1.89e-59	272.15	51229000000	492150	718290	783230	402910	769280	650150	530930	414960	471070
GADPEETILNAFK	13	0	1403.69	P02610;F1NYU0	P02610	92	104	yes	2;3	3.4e-85	272.15	27385000000	22062	24099	25829	278590	319650	346100	202480	158440	163020
FTIDNEGTYTVQIQDGK	17	0	1927.92	F1NNW0;Q02173;A0A1D5PKV3	F1NNW0	1068	1084	yes	2;3	1.28e-58	271.73	2407200000	118820	256710	274750	85151	178890	189590	564180	618450	617630
GQTVQQVYNSVGALAK	16	0	1661.87	A0A1D5P603;P02565;R4GIG1	A0A1D5P603	417	432	no	2;3;4	3.49e-104	271.73	25454000000	228320	437300	453410	154130	292880	149770	351070	153020	77787
VLDRPGPPEGPVEITGVTAEK	21	1	2160.14	A0A3Q2TS15	A0A3Q2TS15	2069	2089	yes	2;3;4	3.37e-130	271.66	38789000000	479650	874100	876640	255570	578220	537530	834890	703250	691850
ANLLQAEVEELR	12	0	1383.74	A0A1D5NYC2;P13538	P13538	1681	1692	no	2;3	5.88e-53	271.65	1344800000000	4765400	6564700	6997800	3314200	4680200	4634900	4288800	4708300	4750200
AADFGPGPMGLMGPR	15	0	1472.69	P02467	P02467	84	98	yes	2;3	3.6e-94	271.65	629230000	89508	76324	101960	77621	59785	91789	108120	79055	73994
TVLIMELINNVAK	13	0	1456.83	Q5ZLC5;A0A1L1RY04	Q5ZLC5	218	230	yes	2;3	4.23e-85	271.14	212210000	0	0	0	0	0	0	92628	96343	95172
SSLSPDGMLTVEAPLPK	17	0	1740.9	F1P593;Q00649	F1P593	154	170	yes	2;3;4	1.17e-104	271.01	30007000000	232210	534440	549910	120470	413700	385530	637960	573960	578400
TIVSTAQISQTR	12	0	1303.71	A6BM71;Q98918;A0A3Q2UG28;Q9IAR9	A6BM71	207	218	no	2;3	3.52e-78	270.93	10012000000	85724	162530	178420	50595	98942	90118	93646	84412	79755
EILGTAQSVGCSIDGR	16	0	1661.8	E1BTG1	E1BTG1	131	146	yes	2;3	1.54e-57	270.79	2377500000	121280	131990	138550	71815	145690	137960	71159	52102	49286
VDGGQYILEASNVAGTK	17	0	1720.86	A0A3Q2TS15	A0A3Q2TS15	3127	3143	yes	2;3	6.17e-67	270.75	28082000000	358600	480650	512410	181530	412910	330670	730040	561120	593060
AAYLMGLNSADLLK	14	0	1478.78	A0A1D5P525;Q9DGM4;A0A1D5P603;A0A1D5PUR6;A0A1D5NVW6;P02565;Q9DGM5;R4GIG1	A0A1D5PUR6	386	399	no	2;3	3.62e-163	270.67	26069000000	180370	593860	418040	37941	84341	186930	235970	83249	59530
ATGGTEITGYYVNYR	15	0	1663.78	F1N9Z6;A0A1D5PSF9;Q90724	F1N9Z6	865	879	yes	2;3	4.73e-94	270.2	4214300000	114790	162790	146820	97277	121810	135210	205360	211430	210950
VDEVTADSITISWEPPK	17	0	1885.93	A0A3Q2TS15	A0A3Q2TS15	1686	1702	yes	2	4.67e-58	270.2	1013000000	33777	93057	86702	43200	81423	135400	0	0	0
FSCDVDGEPAPTITWVR	17	0	1948.9	P79757	P79757	347	363	yes	2	5.95e-58	269.7	4847900000	89523	178030	170770	37257	63923	74589	161550	175760	163960
MTEEEVEELMK	11	0	1366.6	P02604;P02605;F1NZG0	P02604	161	171	no	2;3	6.32e-75	269.14	1476300000000	5075000	11873000	12578000	4829600	13292000	11004000	11657000	8820500	9583400
TWNDPSVQQDIK	12	0	1429.68	Q90593;A0A1D5PG73	Q90593	100	111	yes	2;3	3.48e-41	268.98	1839100000	99473	191490	213770	79906	170060	131780	240560	183380	198330
DVTADDSASIMVK	13	0	1350.63	A6BM71;Q98918;Q9YH41;Q9IAR9	A6BM71	1867	1879	no	2;3	6.19e-85	268.77	13849000000	537790	811220	850110	408110	965770	740810	964520	707300	747950
NAAGVFSEPSESSGAITAR	19	0	1849.88	A0A3Q2TS15	A0A3Q2TS15	1953	1971	yes	2;3	1.47e-63	268.61	38340000000	83522	197520	198510	61965	192490	147440	242890	170240	178780
AAQSQMNQGDLVVAIDGVNTDSMTHLEAQNK	31	0	3284.54	A0A1D5P909	A0A1D5P909	38	68	yes	3;4;5	1.75e-200	268.28	11956000000	193840	249030	299300	83819	103750	134970	385800	388120	429740
LTVEDPVTVEYITR	14	0	1633.86	A0A1D5PJW4;O13268	A0A1D5PJW4	96	109	yes	2;3	4.69e-86	268.14	878530000	25656	63602	70198	84041	132750	142090	153770	139330	134270
QFAAQANVIGPWIQTK	16	0	1770.94	R9PXQ0;P20111;A0A1D5PNV5	R9PXQ0	644	659	yes	2;3;4	1.44e-57	268.08	4660800000	141880	397420	338780	112120	225800	300940	96398	112130	84631
AIAELGIYPAVDPLDSTSR	19	0	1987.03	Q5ZLC5;A0A1L1RY04	Q5ZLC5	393	411	yes	2;3	2.66e-116	267.93	10727000000	194780	227210	234500	136650	190900	191510	173890	157980	161100
LADNLDTLSAAAAK	14	0	1372.72	P08250	P08250	69	82	yes	2;3	4.81e-86	267.93	9622400000	143140	249810	284420	143930	352980	346340	295890	238500	236820
ALGQNPTNAEINK	13	0	1368.7	P02604;P02605;F1NZG0	P02604	79	91	no	2;3;4	6.96e-85	267.85	567680000000	2683000	4689100	5002100	1795500	4507600	3502400	6422000	4814000	5067800
QAILSIQNEVEK	12	0	1370.74	R9PXQ0;P20111;A0A1L1S0L2;A0A1D5PNV5	R9PXQ0	576	587	yes	2;3;4	5.62e-78	267.75	66122000000	555210	975530	987570	289750	846820	703610	1130100	912720	916630
CLFDDEAEYACEAK	14	0	1719.68	A6BM71;A6BLM5	A6BM71	6672	6685	yes	2;3	9.57e-50	267.75	23362000000	401840	990600	972370	282970	939260	758550	815990	611950	632750
LDDECEYSCGVDDR	14	0	1731.64	A6BM71;A6BLM5	A6BM71	7123	7136	yes	2;3	4.91e-86	267.75	40780000000	136930	173900	184100	94062	215260	149240	189420	126750	149990
GVGWLPIQSLEVEK	14	0	1553.85	A0A3Q2U3M8	A0A3Q2U3M8	88	101	yes	2;3	4.91e-86	267.75	4947900000	132900	279330	253730	93797	117640	183960	128520	184740	151050
LDVPISGEPAPTVTWK	16	0	1708.9	P16419	P16419	556	571	yes	2;3;4	1.12e-57	267.67	51072000000	208310	375270	402110	106950	234290	228360	355310	311140	331390
TQEDLKEQVAMVER	14	1	1674.82	A0A1D5P525;A0A1D5PUR6;A0A1D5NVW6;A0A1D5NYC2;F1P3X1;P13538;Q9DGM5	P13538	1666	1679	no	2;3;4	6.14e-60	266.97	639120000000	1067700	2401200	2288000	965760	2624500	2234400	2762800	2587000	2532000
GILGYTEDQVVSCDFNGDSHSSTFDAGAGIALNDHFVK	38	0	4042.83	P00356;F1NH87	P00356	270	307	yes	4;5;6	2.04e-246	266.81	12696000000	378000	361980	238870	237120	107970	154670	825710	1168900	1229800
GVNLPGAAVDLPAVSEK	17	0	1635.88	A0A1D5P9V0;P00548;F1NW43	A0A1D5P9V0	227	243	no	2;3;4	6.11e-58	266.35	102230000000	813290	1158000	1241500	408440	889050	864680	1083600	948740	1014900
TDGLEEGLEYEFR	13	0	1556.7	A0A3Q2TS15	A0A3Q2TS15	4002	4014	yes	2;3	8.27e-85	266.26	61334000000	307570	717620	700480	264400	602810	645050	409820	394910	388430
GITQEQMNDFR	11	0	1337.6	R9PXQ0;P20111;A0A1L1S0L2;A0A1D5PNV5	R9PXQ0	752	762	yes	2;3	1.3e-72	266.17	212190000000	1259500	1422100	1589800	605290	1193400	894010	1464900	1156800	1238900
FTCEVETTPNVK	12	0	1423.67	A6BM71;Q98918	A6BM71	3202	3213	yes	2;3	2.59e-32	266.17	26315000000	210750	440910	442760	164210	414740	334670	644480	516120	524710
LTFDTTFSPNTGK	13	0	1427.69	F6T197;Q9I9D1	Q9I9D1	97	109	no	2;3	4.75e-32	266.12	14550000000	142690	189300	193130	202440	401250	364280	138540	100460	98986
ATDAESEVASLNR	13	0	1361.64	P04268;F1NM23;A0A1D5P342;A0A1D5NVL7;Q91968;A0A1D5PSX3;A0A1L1RVF2;Q90740	P04268	78	90	no	1;2;3	3.62e-161	265.82	774070000000	2079200	2362900	2674700	1982700	3407400	2450600	3113600	2295800	2508100
IDSVDEERYDTEVK	14	1	1696.78	P68246;E1BUD3	P68246	72	85	yes	2;3;4	8.11e-49	265.75	800370000000	2628700	5393300	5568700	2115500	6498000	4972300	5857300	4454400	4428000
SANYNLSLTLQK	12	0	1350.71	A0A1D5P909	A0A1D5P909	71	82	yes	2;3	6.96e-78	265.72	11035000000	71198	157160	173110	34672	78787	78819	251560	218610	203290
VCVETVESGTMTK	13	0	1439.66	Q5ZL82;A0A1D5P8I7	Q5ZL82	401	413	yes	2;3	8.81e-85	265.61	1301200000	31897	46895	51859	48514	100720	83322	225500	148800	159090
SVTELNEPLSNEDR	14	0	1601.75	Q5ZKJ2	Q5ZKJ2	29	42	yes	2;3	6.2e-86	265.53	2361900000	39726	40680	39381	34786	49854	36345	42343	30031	28941
TINEVETQILTR	12	0	1415.76	R9PXQ0;P20111;A0A1L1S0L2;A0A1D5PNV5	R9PXQ0	737	748	yes	2;3	2.15e-41	265.36	317180000000	599200	961150	960150	606830	1167900	1064400	749860	580440	612440
ASAELALGENSEAFK	15	0	1535.75	F1P180;A0A1L1RPR4;P00508	F1P180	101	115	yes	2;3	8.7e-94	265.13	4750000000	152790	223730	236770	54821	127810	105680	172760	123800	145650
VTGLLEGSEYEFR	13	0	1498.73	A0A3Q2TS15	A0A3Q2TS15	69	81	yes	2;3	9.22e-85	265.12	13341000000	199670	347100	339980	162960	225870	280740	239840	277930	278890
IEALPSDISIDEGK	14	0	1485.76	P79757;A0A3Q2UNJ2	P79757	928	941	yes	2;3	1.84e-74	264.84	7778800000	369150	589170	572550	185040	451190	339720	750450	489090	550200
LEAPELDIDSELRK	14	1	1626.85	A0A3Q2TS15	A0A3Q2TS15	3455	3468	yes	2;3;4	1.59e-74	264.84	20632000000	219750	473220	522370	213090	375180	503200	712960	764710	804070
GQEDSNGCINYEAFVK	16	0	1829.79	P02604;P02605;F1NZG0	P02604	172	187	no	2;3;4	3.87e-91	264.58	298680000000	2924400	4247500	3524800	1740900	3475500	3219500	5051700	4815100	4885000
QTLVSEDKENEAVDYSVPIFTGR	23	1	2596.27	F1N9Z6;A0A1D5PSF9;Q90724	F1N9Z6	167	189	yes	2;3;4	6.09e-132	264.36	5562800000	156870	359590	384590	98681	215220	308200	66128	106060	90560
TTPSYVAFTDTER	13	0	1486.69	Q7SX63;B3VHV2;B6EAX2;P08106;A0A346RQZ3;A0A4P8GB30;A0A4P8G8N8;Q7ZSX8;A0A1D5PYK0;A0A1D5PFJ6;F1NWP3;O73885	Q7SX63	38	50	no	2;3	6.14e-39	264.17	48459000000	302620	457170	497580	212350	450340	369280	485100	373490	399090
SEETESPYFSTPLLLGK	17	0	1896.94	E1BVT3	E1BVT3	279	295	yes	2;3	3.77e-91	263.89	11174000000	172060	342820	402380	180510	415850	431280	564940	416000	481660
EYFLSEQNEEK	11	0	1414.63	A0A1D5P0B5	A0A1D5P0B5	60	70	yes	2;3	8.84e-60	263.86	11917000000	221830	469380	527510	127680	339610	301450	384510	308750	314780
IIDITAGNISPQEVQELR	18	0	1995.06	Q5ZJ45	Q5ZJ45	50	67	no	2;3	2.05e-102	263.83	2163400000	173150	183210	194540	115960	141230	151150	374080	322200	335550
VSEPVAALDPVDLER	15	0	1608.84	F1NNW0;Q02173;A0A1D5PKV3	F1NNW0	459	473	yes	2;3	1.3e-80	263.74	149370000000	276290	391390	418200	278580	526170	449160	238200	187390	195910
PASDVICQEYQDNR	14	0	1693.74	A0A1D5NW68;P19121	A0A1D5NW68	96	109	no	2;3	4.38e-49	263.74	51511000000	341670	445330	543440	275370	434980	412230	445010	325750	368930
GLGTDEGAIIEVLTQR	16	0	1670.88	Q6B344;A0A1D5PY67;E1BWX1;P51901	Q6B344	376	391	yes	2;3	1.18e-57	263.7	4021100000	240830	267140	237390	80844	100690	117670	140220	233460	185690
GEIGPAGNVGPTGPAGPR	18	0	1602.81	P02467	P02467	264	281	yes	2;3	9.71e-63	263.59	10627000000	222800	345500	464040	104490	205680	390480	306340	149570	212500
GSSFQTVSALFR	12	0	1298.66	A0A1D5P525;Q9DGM4;A0A1D5P603;A0A1D5PUR6;A0A1D5NVW6;A0A1D5NYC2;F1P3X1;P02565;P13538;Q9DGM5;R4GIG1	P13538	644	655	no	2;3	9.21e-65	263.3	20295000000	198470	336630	705230	66596	68561	404250	109150	242840	150550
VAGSQPLTVSWYK	13	0	1434.75	A6BM71;Q08476	A6BM71	4244	4256	yes	2;3	6.74e-39	263.29	3856500000	101910	245310	253380	137480	255160	262850	200420	184220	179750
FASELSSLER	10	0	1137.57	F1NNW0;Q02173;A0A1D5PKV3	F1NNW0	92	101	yes	2;3	1.77e-55	262.84	60040000000	427900	725030	740940	254790	493230	450940	927860	831500	829650
YGVGEPLESEPVLAK	15	0	1586.82	A0A3Q2TS15	A0A3Q2TS15	2153	2167	yes	2;3	1.34e-56	262.56	14153000000	323620	718770	473170	316750	737130	390900	737730	708840	446250
DALNQALDEELERDER	16	1	1914.89	A0A1D5P1U2	A0A1D5P1U2	37	52	yes	3	1.45e-90	262.5	3556900000	64943	80507	100760	42951	50573	74965	39263	46649	50850
DSYVGDEAQSK	11	0	1197.52	P08023;F1P476;P63270;A0A3Q3AWV3;A0A1D5NV17;A0A3Q3A5C8;P60706;P53478;A0A1L1RPY3;B5M200;Q90736;G8HUH5;P68034;A0A1L1RU07;P68139;A0A1L1RPH2;A0A1D5PK53;Q5ZMQ2;A0A1D5P5D1;Q5ZLX9	P68139	53	63	no	1;2;3	1.99e-125	262.32	1676600000000	10906000	21034000	22194000	9467100	28649000	20746000	27055000	19489000	20673000
DSVSLSWEPPLLDGGAK	17	0	1769.88	A0A3Q2TS15	A0A3Q2TS15	2484	2500	yes	2;3	3.97e-51	262.07	6880500000	160070	363360	352970	86395	174990	186050	519260	479130	469850
KVAEQELMDASER	13	1	1504.72	A0A1D5P525;Q9DGM4;A0A1D5PUR6;A0A1D5NVW6;F1P3X1;Q9DGM5	A0A1D5PUR6	1704	1716	no	2;3	2.06e-58	262.07	113710000000	382960	1590300	791420	479880	929800	2144000	935470	569200	587960
IINEPTAAAIAYGLDK	16	0	1658.89	Q7SX63;B3VHV2;B6EAX2;P08106;A0A346RQZ3;D6PVB7;A0A1D5PYK0;A0A1D5PFJ6;F1NWP3;A0A1L1RPG0;O73885;Q90593;A0A1D5PG73	Q7SX63	173	188	no	2;3	4.23e-58	262.05	17701000000	387250	912420	862670	131160	288150	318480	434270	368840	351260
DLWMPVTSATVK	12	0	1346.69	Q07784	Q07784	302	313	yes	2;3	3.56e-32	261.87	13337000000	157240	293430	294750	166450	365220	344850	103130	89019	89109
RIQLVEEELDR	11	1	1398.75	A0A1D5NT47;F1NK75;A0A1L1RPQ6;Q5ZLJ7;A0A1D5P9B0;A0A1D5P2B9;A0A1D5PV56;A0A1L1RJZ6;P04268;F1NM23;A0A1D5P342;A0A1D5NVL7;Q91968;A0A1D5PSX3;A0A1L1RVF2;A0A1D5P9X2;A0A3Q3ACB9;A0A3Q2U8I1;Q91005;A0A1L1RU52;A0A1L1RVU7;H9L3K0;H9L074;P19352;Q05706;Q8AWI4;A0A452J839;Q90739;Q90740	P04268	91	101	no	2;3	4.91e-36	261.87	61020000000	246430	293320	389240	376790	506310	452210	409830	500840	420560
VYFVHEGYQGLVDGGDNLK	19	0	2109.02	Q90YA3	Q90YA3	37	55	yes	2;3;4	1.33e-62	261.35	10062000000	108050	246560	183120	156140	140560	219130	174420	320020	268190
TIEGIVMAADSAR	13	0	1332.67	A0A1D5PLW0;A0A1D5P984;Q90577	A0A1D5PLW0	462	474	no	2;3	8.68e-32	261.29	11896000000	124180	177820	192700	174410	282790	281220	314990	329750	314470
LAWTAVATEVPLTK	14	0	1498.84	A0A3Q2TS15	A0A3Q2TS15	1036	1049	yes	2;3	3.45e-40	261.22	5121800000	150660	325340	290280	0	0	0	215480	226120	200200
KHADSTAELGEQIDNLQR	18	1	2023.99	A0A1D5P525;Q9DGM4;A0A1D5NWE9;A0A1D5P603;A0A1D5PUR6;A0A1D5NVW6;A0A1D5NYC2;F1P3X1;P13538;Q9DGM5;R4GIG1	P13538	1198	1215	no	2;3;4	2.42e-102	261.19	52754000000	387150	409350	619760	335820	408690	363100	375320	374710	398370
QLEEEQQGLQK	11	0	1328.66	A0A1D5P9X2;P19352;Q05706	P19352	38	48	no	2;3	3.42e-59	260.98	157030000000	413340	1071200	769900	375820	1013500	1912500	1656000	482350	526580
SAMLQLAVTEIEK	13	0	1431.76	P68246;E1BUD3	P68246	20	32	yes	2;3	3.37e-39	260.81	52626000000	227680	625210	545290	126280	255430	314740	433060	537500	489320
SAAYSLESEALSK	13	0	1354.66	F1N9Z6;A0A1D5PSF9	F1N9Z6	102	114	yes	2;3	4e-71	260.6	18242000000	208360	434040	452220	170490	451900	354420	441210	323350	368100
DGEAGAQGPPGPTGPAGER	19	0	1719.78	A0A1D5PYU1;P02457	A0A1D5PYU1	602	620	no	2;3	2.56e-102	260.08	58885000000	149690	92130	201070	112540	102830	164450	256430	95794	122740
KATDAEAEVASLNR	14	1	1473.74	A0A1D5P9X2;A0A3Q3ACB9;A0A3Q2U8I1;P19352;Q05706	P19352	77	90	no	2;3	2.84e-72	259.85	54312000000	98056	264270	201190	165080	406100	596960	750440	174580	187430
VLAVNQENER	10	0	1170.6	R9PXQ0;P20111;A0A1L1S0L2;A0A1D5PNV5	R9PXQ0	275	284	yes	2;3	1.15e-117	259.82	216890000000	845560	1107900	1120400	948850	1591600	1344500	1427700	967860	1019200
GDAGLYTCTASNSVGK	16	0	1599.72	A0A3Q2U434	A0A3Q2U434	257	272	yes	2;3	1.5e-50	259.7	3818200000	41914	153330	89951	46249	128770	135010	245210	142450	181330
IEDEQALGMQLQK	13	0	1501.74	A0A1D5P525;Q9DGM4;A0A1D5P603;A0A1D5PUR6;A0A1D5NVW6;A0A1D5NYC2;P02565;P13538;Q9DGM5;R4GIG1	P13538	1097	1109	no	2;3;4	1.97e-48	259.55	1143100000000	6412100	12309000	12597000	4803900	12176000	9470600	13379000	10610000	10927000
FTSVTDAPDVVQAK	14	0	1476.75	A0A3Q3A4C6;Q9DEG5;Q9DEG4	A0A3Q3A4C6	24	37	no	2;3	5.08e-40	259.55	20895000000	1320500	2600200	2730700	827120	2411500	1850200	1763800	1378800	1482900
ILDSVGIETDDER	13	0	1460.7	A0A1D5PMT8	A0A1D5PMT8	26	38	yes	2;3	4.95e-32	259.35	7516300000	126020	167080	186540	72110	164790	123190	181070	134240	157920
YSIPLDAMEQVLAK	14	0	1576.82	A0A3Q2U3M8	A0A3Q2U3M8	123	136	yes	2;3	4.14e-40	259.23	10003000000	154690	354730	340560	143510	321890	342490	257120	248930	240220
AVFVDLEPTVIDEVR	15	0	1700.9	A0A1D5NW27;P02552;A0A1D5P198	A0A1D5NW27	65	79	yes	2;3	2.2e-41	259.23	2008000000	43848	56188	53055	142550	155820	190420	115180	138370	123820
TQISIPSDTPEMLQSK	16	0	1773.88	A0A3Q3A4C6;Q9DEG5;Q9DEG4	A0A3Q3A4C6	57	72	no	2;3;4	7.93e-90	258.91	20722000000	272440	588300	621340	110020	318140	258310	658310	482900	501630
LFFVSENPADQNEK	14	0	1636.77	F1NX83;A0A1D5PF87	F1NX83	1336	1349	yes	2;3	5.42e-40	258.78	5846000000	229060	382680	368940	101780	188920	196210	289950	265550	276410
TAEECLAFFGVNESVGLSGEQVR	23	0	2498.17	P13585	P13585	8	30	yes	2;3	1.17e-82	258.61	4789100000	66743	131020	105340	68926	80283	116360	144070	292720	263930
QTDSTTWTELATTVIR	16	0	1821.91	A0A3Q2TS15	A0A3Q2TS15	636	651	yes	2;3	8.34e-90	258.6	8427400000	207830	351300	316470	161750	250130	318980	381030	484180	427290
DIENQTVLTDEDAIFECEIK	20	0	2381.09	A6BM71;Q08476	A6BM71	4630	4649	yes	2;3	8.38e-114	258.23	20827000000	142630	255300	258430	125790	292780	334930	198400	201600	202890
EGETMSLGCTVVISPDIK	18	0	1934.93	F1N9Z6;A0A1D5PSF9;Q90724	F1N9Z6	420	437	yes	2;3	2.44e-69	257.8	2791700000	96442	207610	222580	72688	220080	193480	282850	269960	287540
LTVLEGDPYFTGK	13	0	1438.73	A6BM71;A6BLM5	A6BM71	6248	6260	yes	2;3	8.25e-33	257.8	8411000000	171830	373030	339910	114770	206240	239200	61445	63453	60138
YYTSASGDEMVSLK	14	0	1549.7	P11501;A0A1D5PUL6;A0A1D5P5R0;A0A1L1RND0	P11501	461	474	yes	2;3	4.63e-72	257.79	1164000000	10139	21687	19520	66137	130600	111460	195590	156650	150920
VIGGLPDVVTIMDGK	15	0	1512.82	F1NNW0;Q02173;A0A1D5PKV3	F1NNW0	1334	1348	yes	2;3	1.41e-47	257.79	43569000000	220460	463250	453030	97930	202920	208370	415580	398710	394400
ITLPVDFITADK	12	0	1331.73	F1NU17;P51903	F1NU17	280	291	yes	2;3	4.2e-64	257.72	37206000000	67139	159060	175070	151990	310360	451340	126640	113590	130490
GLSVLEETPDMLR	13	0	1458.74	A0A3Q3A4C6;A0A1D5NY50;Q9DEH4	A0A3Q3A4C6	2340	2352	no	2;3	6.7e-71	257.72	31902000000	363920	393690	404750	481240	608690	598600	452370	426730	459300
EVAAFAQFGSDLDAATQQLLNR	22	0	2364.17	A0A1L1RY35;A0A1D5PN54;A0A175KE65;Q8UVX3;A0A1D5PJG9;A0A1L1RZJ6;A0A182C637;A0A1D5P3S4	A0A1L1RY35	427	448	no	3	9.72e-131	257.72	1296300000	47200	56378	54848	8910.3	10159	15514	15884	24995	21521
VAEQELMDASER	12	0	1376.62	A0A1D5P525;Q9DGM4;A0A1D5PUR6;A0A1D5NVW6;F1P3X1;Q9DGM5	A0A1D5PUR6	1705	1716	no	2;3	4.31e-64	257.54	122580000000	190100	905290	313350	185210	366680	1315700	356110	177130	204380
ALPFWNEEIVPQIK	14	0	1682.9	Q5ZLN1;F1NHM9	Q5ZLN1	163	176	yes	2;3;4	5.06e-72	257.13	44400000000	107900	174040	160530	163280	170640	262650	140950	227850	179110
DEIAPPTLDLDFR	13	0	1500.75	Q07784	Q07784	158	170	yes	2;3	7.29e-71	257.09	21555000000	360610	569010	515590	221210	399580	384680	338460	274970	296670
ADSLATQELMR	11	0	1233.6	A0A1D5PLW0;A0A1D5P984;Q90577	A0A1D5PLW0	574	584	no	2;3	7e-59	256.91	37895000000	357140	417590	435460	290200	512290	396270	407670	308820	339310
DLYANTVLSGGTTMYPGIADR	21	0	2214.06	P60706;P53478;Q5ZMQ2;A0A1D5P5D1	P60706	292	312	no	2;3	2.95e-76	256.67	3914600000	93059	139950	163080	47827	73299	95149	113490	117960	120290
ANYTSVVDTPEIIHAQQVK	19	0	2112.09	A0A3Q3A4C6;A0A1D5NY50;Q9DEH4	A0A3Q3A4C6	2412	2430	no	2;3;4	4.46e-102	256.52	16355000000	422830	858430	894190	105210	191720	185620	287610	259860	266460
HVFGESDELIGQK	13	0	1457.72	P00940	P00940	100	112	yes	2;3;4	4.66e-33	256.48	170740000000	1469500	2031900	2476200	937340	1342500	1915000	1607600	1758700	1993900
LQTETGEYSR	10	0	1182.55	A0A1D5NYC2;P13538	P13538	1283	1292	no	1;2;3	6.16e-117	256.38	1025900000000	2908600	3912100	4314800	2819800	5953900	3765800	4514600	3704700	4075300
VSAENAAGLSEPSLPSTYYK	20	0	2083.01	A0A3Q2TS15	A0A3Q2TS15	2247	2266	yes	2;3;4	5.34e-115	256.26	18033000000	132290	195920	188090	109850	196670	171190	480330	364220	285920
TSDVDSVFFIR	11	0	1284.63	P16419	P16419	881	891	yes	2;3	8.07e-59	255.71	17281000000	218390	487160	432740	120010	208040	267860	426240	559380	517940
EVTVSENFQK	10	0	1179.58	F1NH40	F1NH40	531	540	yes	2;3	7.98e-55	255.71	2653900000	130770	213250	208960	82132	184490	148920	294640	206780	214630
DFEISQIQSK	10	0	1193.59	A0A1D5P525;Q9DGM4;A0A1D5P603;A0A1D5PUR6;A0A1D5NVW6;A0A1D5NYC2;F1P3X1;P02565;P13538;Q9DGM5;R4GIG1	P13538	1087	1096	no	1;2;3	1.05e-23	255.39	388640000000	3470800	6565000	6916900	2123600	4919800	4201200	7553700	6185000	6431900
NAGPQIDQNMR	11	0	1242.58	F1NX83;A0A1D5PF87	F1NX83	1219	1229	yes	2;3	8.35e-59	255.39	18061000000	195450	317750	298250	117020	280100	185270	489710	365780	386170
AWTMPEPGPAYDLTVCEVR	19	0	2191.01	F1NNW0;Q02173;A0A1D5PKV3	F1NNW0	795	813	yes	2;3	2.16e-57	255.34	8642100000	169530	251630	245240	86807	128600	143600	286780	399400	369000
ALQSTVSQYQK	11	0	1251.65	F1N9Z6;A0A1D5PSF9	F1N9Z6	22	32	yes	2;3	3.82e-28	255.19	4231700000	41094	68705	89187	49714	112100	97798	81055	67055	68449
ETSTAAWSEVSATVAR	16	0	1664.8	A0A3Q2TS15	A0A3Q2TS15	6047	6062	yes	2;3	1.1e-50	255.16	22045000000	286240	424590	448840	226830	392720	365310	807090	732910	712980
EEQAEPDGTEVADK	14	0	1516.65	A0A1D5P525;Q9DGM4;A0A1D5P603;A0A1D5PUR6;A0A1D5NVW6;A0A1D5NYC2;F1P3X1;P13538;Q9DGM5;R4GIG1	P13538	373	386	no	2;3;4	6.53e-72	254.89	262590000000	441200	1123100	1046400	426810	1474000	981830	1621600	1060400	1151100
NGENEPMCPLVDNWR	15	0	1829.78	A0A1D5NTS2	A0A1D5NTS2	233	247	yes	2;3	1.15e-79	254.89	633780000	10365	6470	6754.7	29939	46690	190100	7871.4	9904.8	8360.2
YYSLTNMSER	10	0	1262.56	P11009;F1NAD3	P11009	207	216	yes	2	1.4e-23	254.83	9082700000	57059	104570	104390	69902	164840	159800	234360	165450	199890
EAFTIMDQNR	10	0	1223.56	P02610;F1NYU0;A4UNW1;A0A1D5PFA5;P02611	A4UNW1	30	39	no	2;3	1.72e-23	254.82	5949700000	0	0	0	113390	166270	163740	53635	48246	51682
LYFVSEPQSIK	11	0	1309.69	A6BM71;Q08476	A6BM71	4425	4435	yes	2;3	3.03e-27	254.57	4172200000	144360	326760	285140	132730	241450	277910	91919	81121	79084
VMAENEFGIGVPAETADAVK	20	0	2046.99	A0A3Q2TS15	A0A3Q2TS15	3625	3644	yes	2;3;4	6.39e-115	254.56	29790000000	487290	874050	854400	287470	671600	522390	1212600	940120	976050
YGVGEPLESVPVMMK	15	0	1634.8	A0A3Q2TS15	A0A3Q2TS15	3235	3249	yes	2;3	2.39e-40	254.19	5916300000	301850	606170	595400	113610	311230	248830	165670	143660	144970
ADETKDEQFEQCVQNFNK	18	1	2228.96	F1NZ04;Q5ZLU2	F1NZ04	36	53	yes	2;3;4	9.9e-102	253.89	8267700000	63369	147720	147000	100300	338580	299840	304370	211750	205400
ESFVEMSSSSIMGK	14	0	1517.67	P79757;A0A3Q2UNJ2	P79757	890	903	yes	2;3	7.24e-72	253.79	690100000	112790	153170	134810	0	0	0	119210	98642	103640
GVVDSDDLPLNVSR	14	0	1484.75	P08110;A0A1D5PPN9;B5AAV6;Q90WA6	P08110	434	447	yes	2;3	7.25e-72	253.79	4048000000	166630	237580	271510	171850	400260	343320	199550	172330	177870
VMAENAAGVSEPSPTSPFYK	20	0	2080.98	A0A3Q2TS15	A0A3Q2TS15	1165	1184	yes	2;3;4	9.63e-68	253.79	18565000000	192730	311340	312430	99608	222310	185930	371060	270030	265990
GYSFVTTAER	10	0	1129.54	P08023;F1P476;P63270;A0A3Q3AWV3;A0A1D5NV17;P68034;A0A1L1RU07;P68139;A0A1L1RPH2;A0A1D5PK53	P68139	199	208	no	1;2;3	1.16e-98	253.64	631890000000	2343900	2707900	3022500	4024700	6561900	5743500	5335800	4577300	4718300
GQSVQQVYYSIGALAK	16	0	1710.89	A0A1D5P600;Q910C5	Q910C5	407	422	no	2;3	3.22e-58	253.16	7120600000	0	0	0	16994	18971	22349	85981	88006	103730
MTEEEVEELMKGQEDSNGCINYEAFVK	27	1	3178.38	P02604;P02605;F1NZG0	P02604	161	187	no	3;4	4.18e-154	253.08	8272000000	53256	148110	150760	94435	348710	268140	454870	1077700	512970
LQDYSALEKDDITLQCELSK	20	1	2368.15	A6BM71;A6BLM5	A6BM71	5906	5925	yes	2;3;4	8.73e-104	252.47	9471800000	182220	478100	499640	193710	432090	612820	152820	212030	192590
VFAENMCGLSEDATMTK	17	0	1902.82	A0A1D5PCL3;A0A3Q3AWG5;A0A3Q3A8C1;A0A1D5PBR5;E1C5Z5;A0A3Q2UBY4;A0A1D5PE78;A0A1D5PHW7	A0A3Q2UBY4	1020	1036	no	2;3	6.43e-51	252.43	1991400000	59900	211300	140990	95833	294960	519940	131710	125400	121720
GTCLVVPDTPQILLAK	16	0	1723.95	A0A3Q3A4C6;A0A1D5NY50;Q9DEH4	A0A3Q3A4C6	1982	1997	no	2;3;4	1.58e-46	252.42	18650000000	201800	316240	307840	68558	127130	107980	264750	209210	207370
LVVELSDPDLPLK	13	0	1436.81	P16419	P16419	270	282	yes	2;3;4	4.66e-33	252.3	34950000000	328730	643840	622320	239100	438850	496690	536200	620460	643980
LSAEDLVLEGAGLR	14	0	1441.78	A0A3Q2UAJ4;F1NI05;Q90ZN3	A0A3Q2UAJ4	574	587	yes	2;3	2.48e-60	251.81	1291400000	111700	166180	163000	116940	169300	206970	185530	189390	172990
PAIQSSEITIPVTVEAK	17	0	1781.98	F1P593;Q00649	F1P593	171	187	yes	2;3;4	8.85e-140	251.68	24456000000	141270	419940	437350	87916	353460	332640	551490	516140	509620
LVIGQNGILSTPAVSCIIR	19	0	2010.13	F1NN63;Q2UZR2;F1NM36	F1NN63	86	104	no	2;3	3.43e-57	251.68	3275200000	66990	117460	96891	29672	38321	53194	118540	182430	155250
VEDVPVFSTELDAESIPVR	19	0	2101.06	A0A1D5PUM7;E1C7I7	A0A1D5PUM7	75	93	no	2;3	2.16e-57	251.68	15875000000	216280	324810	391200	111520	233530	190030	210600	261470	242290
YTTVVDTPENIR	12	0	1406.7	Q9DEH4	Q9DEH4	1443	1454	yes	2;3	2.05e-52	251.64	19910000000	308720	455710	490270	202700	423790	400830	587250	430930	480140
GAAALNIESTAR	12	0	1172.61	A6BM71;Q98918;Q9IAR9	A6BM71	1339	1350	no	2;3	2.05e-52	251.64	31464000000	629130	810440	876450	261300	496280	412060	825980	583810	651040
NPDDITNEEYGEFYK	15	0	1832.77	P11501;A0A1D5PUL6;A0A1D5P5R0;A0A1L1RND0	P11501	296	310	yes	2;3	1.44e-47	251.63	27939000000	131810	298780	296710	164580	457350	344050	340750	257620	246860
MAHEGALPAVAVDQK	15	0	1535.78	A6BM71;Q98918;Q9YH41;Q9IAR9	A6BM71	1550	1564	no	2;3;4	6.7e-68	251.3	19853000000	125590	131860	147230	256910	510780	422120	585590	450690	460270
EVAYEEEQIIHEEVVEVPK	19	0	2268.12	A6BM71;A6BLM5;Q08476;A6BM73;A6BLM6;A6BLM8;A6BLM7	A6BM71	5038	5056	no	3;4	8.73e-91	251.19	30611000000	416870	734030	764120	286240	363840	638880	114380	415160	347010
NMLFSGTNIGAGK	13	0	1308.65	P13585	P13585	206	218	yes	2;3	5.22e-59	251.03	57980000000	251490	724060	808430	235670	766730	779590	533080	501460	479130
DYESASLTEVR	11	0	1268.59	R9PXQ0;P20111;A0A1L1S0L2;A0A1D5PNV5	R9PXQ0	431	441	yes	2;3	3.83e-47	250.96	174860000000	475030	563680	602070	537450	926480	754820	1006500	707060	780490
IEDLSQQAQLAAAEK	15	0	1613.83	A0A1L1RNL6;A0A1D5PLP1;A0A1D5PMH5	A0A1L1RNL6	1348	1362	yes	2;3	1.88e-41	250.89	2083800000	115770	226830	230060	82739	199150	200900	315180	247280	257360
AVPATEFVTTAVLPEER	17	0	1828.96	A0A3Q2UAA5	A0A3Q2UAA5	47	63	yes	2;3	7.91e-51	250.8	15393000000	186810	219560	231710	157790	204200	252550	258350	205660	213240
GLCFSAENEPVCR	13	0	1537.67	P07630	P07630	227	239	yes	2;3	5.92e-59	250.7	7802500000	256400	319940	329220	156180	252580	238340	380020	267460	307380
VPTPNVSVVDLTCR	14	0	1555.8	P00356;F1NH87	P00356	233	246	yes	2;3	4.16e-60	250.67	404980000000	1612300	2354500	2599400	809850	1589400	1470300	2095700	2047000	1988000
ALTVPELTQQMFDAK	15	0	1690.86	F1NYB1;P09653	F1NYB1	283	297	no	2;3	8.61e-68	250.67	9135300000	107180	212690	204610	57228	121400	115650	217090	187250	165030
QQEEEPEVDVWELLK	15	0	1869.9	A0A1D5PCL3;A0A3Q3AWG5;A0A3Q3A8C1;A0A1D5PBR5;E1C5Z5;A0A3Q2UBY4;A0A1D5PE78;A0A1D5PHW7	A0A3Q2UBY4	198	212	no	2;3	9.09e-68	250.52	9505800000	77072	528170	211830	94643	293840	991640	129080	129020	121930
QSDINTCFGEEGANLIVQSR	20	0	2237.04	A0A1D5NW68;P19121	A0A1D5NW68	539	558	no	2;3	6.06e-103	250.27	26738000000	179860	246040	278170	139980	299840	301200	192300	160650	161950
LETDIAQIQSEMEDTIQEAR	20	0	2319.09	A0A1D5P525;Q9DGM4;A0A1D5NVW6;F1P3X1;Q9DGM5	A0A1D5NVW6	1738	1757	no	2;3	3.22e-70	250.17	7802200000	29252	38039	38204	56015	73294	175800	89202	60878	60598
IRDEMAATEQDKTPLQQK	18	2	2101.05	P13585	P13585	235	252	yes	2;3;4;5	2.57e-89	250.04	95490000000	879420	1972700	2037100	528160	1334900	1402900	2336800	2253000	2240100
GNQALAAGDIGAAVR	15	0	1382.73	A0A3Q2TXL9;Q9PSQ5	A0A3Q2TXL9	18	32	yes	2	1.07e-67	249.98	423500000	29398	34071	39999	29648	62889	51466	30492	21596	23127
DTTTTTWDIVSAAVAR	16	0	1706.85	A0A3Q2TS15	A0A3Q2TS15	4964	4979	yes	2;3	1.27e-77	249.98	8523000000	130720	228230	231230	54917	108510	115910	112450	117430	109490
ACTGNLNMTLQR	12	0	1377.65	A0A3Q2U6G6;A0A1D5P8X3;Q5F3G1;F1NTC8;A0A3Q2UJ04	A0A3Q2U6G6	72	83	no	2;3	4.08e-52	249.83	10586000000	365460	481430	486580	165460	337260	302160	491250	404350	388450
NTDTSVVVTWTESPDAK	17	0	1848.87	F1N9Z6;A0A1D5PSF9;Q90724	F1N9Z6	752	768	yes	2;3;4	3.94e-78	249.73	10405000000	387520	682450	565890	232450	524990	509810	601430	576880	570010
LEEAGGATAAQLEMNKK	17	1	1759.88	F1NM49;Q9IBD4	F1NM49	1151	1167	yes	2;3;4	1.44e-78	249.62	52639000000	531250	996250	938220	263610	951080	434690	1875200	1501800	1530900
KMEGDLNEMEIQLSHANR	18	1	2113.99	A0A1D5P525;Q9DGM4;A0A1D5PUR6;A0A1D5NYC2;A0A1D5P600;Q90WH5;A0A1D5PFB7;A0A1D5NXZ4;F1P3X1;P13538;Q910C5;A0A1D5NZY9;F1NM49;Q9IBD4;P29616;Q8UWA0;P79793;Q91411	P13538	1620	1637	no	2;3;4	7.34e-90	249.47	147350000000	822820	1564100	1838900	973190	1556200	1611600	726290	1323300	1173900
ESENLWISYSENVASLK	17	0	1967.95	A6BM71;Q98918;A0A3Q2U434	A6BM71	3506	3522	no	2;3	4.39e-78	249.3	2973800000	89417	216910	149810	164790	217930	352170	183400	392480	341400
EVDEQMLNVQNK	12	0	1445.68	F1NYB1;P09206;P32882;P09203;G1K338;P09244;A0A1D5P2C3	F1NYB1	325	336	no	2;3	8.59e-26	249.23	35281000000	472270	671180	731950	303660	654390	514460	810030	578660	587000
LIEDTEDWHPR	11	0	1409.66	A0A3Q2U6G6;A0A1D5P8X3;Q5F3G1;F1NTC8;A0A3Q2UJ04	A0A3Q2U6G6	169	179	no	2;3	2.27e-73	249.03	47776000000	546190	542500	604500	370900	375390	497520	377260	405060	405740
KVAEQELLDATER	13	1	1500.78	A0A1D5NYC2;P13538	P13538	1703	1715	no	2;3	3.23e-40	248.77	956360000000	2108800	3263400	3795000	2043400	3784800	2976500	3258400	3109700	3149000
TVTAMDVVYALK	12	0	1309.7	P70081;P62801	P70081	81	92	yes	2;3	5.02e-26	248.73	3408700000	44564	103530	82528	158510	212660	289820	186710	215080	193960
AFLSEEMIAEFK	12	0	1413.68	P02588	P02588	13	24	yes	2;3	2.91e-25	248.45	34142000000	523970	1314700	938430	735850	830090	1168900	415690	1423600	1129600
SSDAGTYECVAVNR	14	0	1527.66	A0A1D5NT92	A0A1D5NT92	330	343	yes	2;3	8.14e-34	248.41	848070000	18757	31860	32133	24282	60216	43623	33362	22438	27845
ATDAEAEVASLNR	13	0	1345.65	A0A1D5P9X2;A0A3Q3ACB9;A0A3Q2U8I1;P19352;Q05706	P19352	78	90	no	2;3	1.8e-120	248.09	119680000000	322030	587770	425970	248780	404600	713960	663470	228080	281630
IIYGGSVTGGNCK	13	0	1324.64	P00940	P00940	206	218	yes	1;2;3	1.15e-58	248.09	86538000000	318790	512000	606760	298760	661570	593490	768370	580080	571120
GELVPLDTVLDMLR	14	0	1569.84	P05081	P05081	65	78	yes	2;3	2.81e-28	248.05	6093700000	289700	363520	318200	99850	74656	119310	101660	183460	170350
ATSTAELLIQGEEEAVPAK	19	0	1956.01	A6BM71;Q98918;A0A3Q2UG28;Q9IAR9	A6BM71	185	203	no	2;3;4	8.25e-90	247.93	24040000000	440000	660010	720190	220130	412680	371440	759000	565690	621270
AEAVATVVAAVDQAR	15	0	1469.78	A6BM71;Q98918;Q9IAR9;O42096	A6BM71	454	468	no	2;3	1.78e-67	247.67	5655600000	73250	94505	89798	69776	133330	133270	203260	189370	185600
QAEEAEELSNVNLTK	15	0	1673.81	A0A1D5NVW6;Q90900;Q9DGM5	A0A1D5NVW6	1889	1903	no	2;3;4	2.59e-48	247.64	16821000000	0	0	0	393680	722190	1263300	380000	96921	124210
EMEENFAVEAANYQDTIGR	19	0	2185.96	F1NJ08;A0A1L1RXL9;P09654;Q49MC0	F1NJ08	340	358	yes	2;3	1.42e-79	247.38	17318000000	198200	186990	183900	99254	111030	135840	178100	134240	142820
DVASAQWVSVSSSSK	15	0	1536.74	Q07784	Q07784	695	709	yes	2;3	1.89e-67	247.32	4489300000	187160	372470	400900	32774	103380	88635	394110	330270	320080
STPSSISTVSSICPTELK	18	0	1892.94	F1NHA9	F1NHA9	148	165	yes	2;3	1.07e-56	247.32	5971500000	134110	272440	294410	45460	100250	108070	111480	82821	81344
ELEGEVDSEQKR	12	1	1417.67	A0A1D5PUR6;P13538	P13538	1824	1835	no	2;3;4	1.93e-52	247.31	902520000000	3432300	5858100	5716000	2406900	6127000	4345500	7053200	6311500	6673100
ELTYQCEEDRK	11	1	1469.65	A0A1D5NYC2;P13538	P13538	1852	1862	no	2;3;4	2.57e-90	247.31	794280000000	2517500	4503700	5200900	2311000	5153700	4215900	4728900	4748100	4914600
LAAVDATVNQMLANR	15	0	1585.82	F1NK96;Q5F472	F1NK96	223	237	yes	2;3	1.9e-67	247.3	355310000	26709	44980	45129	14946	25220	33224	36443	42020	37230
SEVDDAFLSDEDITSR	16	0	1797.79	A0A1D5PWR4;A0A1D5PQ85;A0A1D5P9F9;A0A1D5PFG3;Q90633	A0A1D5PWR4	750	765	yes	2;3	2.3e-77	247.14	1012700000	41997	50635	43392	34583	54885	45196	35183	18518	19227
DFPGFNASQDADALYNAMK	19	0	2073.91	Q6B344;A0A1D5PY67;E1BWX1	Q6B344	14	32	yes	2;3	3.1e-57	246.96	3900100000	120300	216480	211320	57204	115310	136510	252200	225920	192120
QREEQAEPDGTEVADK	16	1	1800.81	A0A1D5P525;Q9DGM4;A0A1D5P603;A0A1D5PUR6;A0A1D5NVW6;A0A1D5NYC2;F1P3X1;P13538;Q9DGM5;R4GIG1	P13538	371	386	no	2;3;4;5	3.21e-50	246.86	826190000000	2114600	4227000	4336400	1624300	5252800	3988300	4257600	3061700	3048300
VVTDTDETELAR	12	0	1347.65	Q5ZLX2	Q5ZLX2	277	288	yes	2	7.67e-52	246.63	3071700000	59053	67205	67054	46931	91149	69114	112020	72844	82176
AEVAQSGDGTVAVR	14	0	1358.68	Q90WF0	Q90WF0	1753	1766	yes	2;3	1.03e-59	246.51	3563100000	201990	157850	163080	94586	140170	125300	168710	106680	116030
LDIDSEPTIAR	11	0	1228.63	A0A1D5P9V0;P00548;F1NW43	A0A1D5P9V0	52	62	no	1;2;3	3.72e-62	246.41	602160000000	1890800	1903500	2036200	2035100	3201500	2533400	4363600	3054600	3608700
DDVFLSVPCVLGSSGITDVVK	21	0	2206.12	P00340;E1BTT8;A0A1D5NZ01	P00340	285	305	yes	2;3;4	3.49e-70	246.18	80576000000	373050	887200	1000600	126310	279210	445790	689870	795940	843260
DADAEIPGAPGAPLDVQCLDANK	23	0	2336.1	F1N9Z6;A0A1D5PSF9;Q90724	F1N9Z6	503	525	yes	2;3;4	1.32e-81	246.18	33678000000	328050	656180	763240	207230	486250	451480	669980	540450	612820
DSTVTVTNDGATILK	15	0	1533.79	Q5F424	Q5F424	58	72	yes	2	3.42e-38	245.69	157280000	17311	30145	33782	0	0	0	15465	10862	10340
IEDQQVTEAQLQK	13	0	1528.77	A0A1D5NZY9;Q8UWA0	A0A1D5NZY9	1102	1114	no	2;3	5.19e-32	245.69	4423500000	0	0	0	38870	188150	46432	120510	71127	79468
AAENTIVVVAGNK	13	0	1284.7	P16419	P16419	541	553	yes	2;3	1.68e-58	245.58	33350000000	413270	671240	628260	435910	801060	695010	1670600	1366900	1446500
DEGEYTVTAGQDK	13	0	1411.61	A6BM71;A6BLM5	A6BM71	7036	7048	yes	2;3	7.23e-32	245.58	5414100000	153840	321650	358440	61333	187760	183880	213770	159700	196140
VDSLQEGCNYYFR	13	0	1649.71	A0A3Q2TS15	A0A3Q2TS15	1448	1460	yes	2;3	1.68e-58	245.58	13274000000	137140	292950	275360	144580	285790	286740	293950	279900	291590
YGTGEPLESEPVVAR	15	0	1602.79	A0A3Q2TS15	A0A3Q2TS15	4318	4332	yes	2;3	2.42e-67	245.58	54629000000	216790	358780	365940	199740	472450	369110	468490	338170	368500
IMTNGGESEAELSVEEK	17	0	1821.83	P16419	P16419	413	429	yes	2;3	7.59e-51	245.48	30078000000	322210	650400	389010	282320	783960	683780	493760	519340	455510
GTLEDQIIQANPALEAFGNAK	21	0	2199.12	A0A1D5P600;A0A1D5PFB7;A0A1D5NXZ4;Q910C5	Q910C5	207	227	no	2;3;4	8.63e-71	245.4	20216000000	138740	154160	179350	0	0	0	165410	182280	198590
TLSDYNIQK	9	0	1080.55	P79781;Q91021;A0A1D5P546;P0CG62;Q9PST8;Q91022	P79781	55	63	yes	2;3	1.97e-40	245.16	45676000000	254950	526020	565040	325630	837450	680920	888780	695710	692580
GHDVSTLELSGK	12	0	1241.63	F1NNW0;Q02173;A0A1D5PKV3	F1NNW0	1195	1206	yes	2;3;4	3.66e-32	245.08	45714000000	455770	592550	676700	357100	612570	599740	727370	585180	715280
MLDAEDIVNTPKPDER	16	1	1841.88	R9PXQ0;P20111;A0A1L1S0L2;A0A1D5PNV5	R9PXQ0	231	246	yes	2;3;4	6.5e-57	244.46	229500000000	1285900	2728700	2948300	939760	2271100	2094200	2117400	1786800	1871100
AALDVTLLGPTGTPEPVEVR	20	0	2034.1	Q90WF0	Q90WF0	1464	1483	yes	2;3	1.71e-102	244.44	1508200000	51145	59984	62141	45264	53501	59422	115980	132170	133470
DGLPAGAGVAGAGVAGAGAVGSPFGK	26	0	2110.08	A0A1D5PUM7;E1C7I7	A0A1D5PUM7	634	659	no	2;3	3.4e-85	244.32	2368100000	90081	189740	254030	11155	21065	20805	54532	60119	100720
VLDRPGPPEGPLAVSEVTAEK	21	1	2160.14	A0A3Q2TS15	A0A3Q2TS15	987	1007	yes	2;3;4	2.82e-103	244.31	50502000000	416610	847500	891270	249160	600520	525590	1099800	876070	879320
ESDVGACLDTK	11	0	1193.52	A0A1D5NW68;P19121	A0A1D5NW68	149	159	no	2;3	1.32e-20	244.28	96719000000	752820	969000	1180700	511970	1278800	1227300	1128100	750350	840340
SSCTASLQVSDR	12	0	1309.59	A6BM71;Q98918	A6BM71	3638	3649	yes	2;3	4.56e-96	244.27	18194000000	262760	365910	347610	144150	310440	261380	346150	224660	261190
RDLEEATLQHEATAAALR	18	1	1994.02	A0A1D5P525;Q9DGM4;A0A1D5NWE9;A0A1D5P603;A0A1D5PUR6;A0A1D5NVW6;A0A1D5NYC2;A0A1D5PFB7;A0A1D5NXZ4;F1P3X1;P02565;P13538;Q9DGM5;R4GIG1	P13538	1179	1196	no	2;3;4	1.47e-150	244.18	197570000000	326880	543270	660810	299600	630390	619400	431980	432200	436500
AGAGSATLSMAYAGAR	16	0	1453.7	E1BVT3	E1BVT3	241	256	yes	2	3.37e-77	244.18	553670000	17146	30555	41352	12244	28587	23029	26683	22892	23483
VVQCSDLGLER	11	0	1274.63	P28675;A0A1L1RX77	P28675	62	72	yes	2	3.72e-27	244.16	9918200000	154850	137830	203660	155630	219210	237900	366540	187450	186390
VTLDVNHFAPEELVVK	16	0	1808.97	F1P593;Q00649	F1P593	96	111	yes	2;3;4	1.61e-50	244.08	18967000000	210010	486690	489230	91258	168330	256870	317540	502480	509420
VSGENEYGVGVPSETK	16	0	1650.77	A0A3Q2TS15	A0A3Q2TS15	5787	5802	yes	2;3	2.99e-50	244	32546000000	443320	880510	846060	204580	630920	455240	757990	514930	525800
NTFSQLSELHCDK	13	0	1577.71	P02112	P02112	84	96	yes	2;3;4	2.04e-58	243.88	22662000000	160770	281510	343930	117560	187220	286100	411550	378410	424070
RVDQDQENLTGLR	13	1	1542.78	Q9DEH4;A0A3Q2U8G4	Q9DEH4	2218	2230	yes	2;3	1.77e-58	243.85	22362000000	98776	158330	194180	140120	292920	252810	182860	144250	160490
LGTFENTVNMWVLEEEVGGR	20	0	2279.09	A0A3Q8WI14	A0A3Q8WI14	29	48	yes	2;3	4.97e-64	243.8	1020900000	0	0	0	43596	29244	37963	48628	173790	133610
MDDMGEYSYEIASSK	15	0	1724.69	A6BM71;Q98918;Q9YH41	A6BM71	2410	2424	no	2;3	3e-67	243.7	32333000000	514320	845480	872840	490540	864460	721650	522780	390690	449010
DDLFNTNASIVATLTTACAK	20	0	2125.04	E1BVT3	E1BVT3	110	129	yes	2;3	1.4e-75	243.69	5856600000	76140	125970	136320	53502	113110	130200	138690	126460	139930
GAPTTSLTSVAVTK	14	0	1331.73	E1C4W4	E1C4W4	216	229	yes	2	3.38e-40	243.53	389140000	58655	90392	117010	8807.8	21778	28637	82083	55428	63896
LGYVLTCPSNLGTGLR	16	0	1719.9	P11009;F1NAD3	P11009	311	326	yes	2;3	1.07e-44	243.4	2944700000	68087	117230	148370	62938	97263	140480	50948	54948	64112
EITEITSEEEEEIEMVQHVHR	21	0	2566.19	P79757	P79757	11	31	yes	3;4	2.63e-103	243.29	5946700000	28232	34728	32908	30506	35552	44786	31232	32878	31764
QAFTQQIEELK	11	0	1333.69	A0A1D5P525;Q9DGM4;A0A1D5P603;A0A1D5PUR6;A0A1D5NVW6;F1P3X1;P02565;Q9DGM5;R4GIG1	A0A1D5PUR6	1310	1320	no	2;3	9.95e-75	243.13	13792000000	113150	379650	258680	52361	108870	134710	150500	81850	79612
YTTVTETADSER	12	0	1371.62	A0A3Q3A4C6;A0A1D5NY50;Q9DEG5;Q9DEH4	A0A3Q3A4C6	1033	1044	no	2;3	1.18e-51	242.97	14511000000	206950	197110	202220	352990	401470	304190	327980	232190	272540
ASEAPSPPDSLNIMDVTR	18	0	1898.9	A0A3Q2TS15	A0A3Q2TS15	397	414	yes	2;3	7.33e-57	242.91	29024000000	243450	404010	415510	204040	440400	320230	319000	228220	246590
VLTVINQTQK	10	0	1142.67	Q98TF7;A0A1D5PFV4	Q98TF7	57	66	yes	2	1.6e-23	242.83	639630000	33071	54410	61297	8103.3	18616	15566	63982	45688	46947
SVTEQGAELSNEER	14	0	1547.71	Q5ZKC9;A0A1L1RSI2;A0A1L1RRT9;A0A1D5P8V3	Q5ZKC9	28	41	yes	2;3	1.58e-59	242.8	2846300000	35821	38967	37983	22923	33465	32974	39485	24197	27137
QAEEKDALISQLSR	14	1	1586.83	A0A1D5NYC2;P13538	P13538	1293	1306	no	2;3	5.85e-59	242.8	62380000000	501140	505260	369230	268360	746780	408410	1544000	1628300	1136300
VALTGLTVAEYFR	13	0	1438.78	Q5ZLC5;A0A1L1RY04	Q5ZLC5	287	299	yes	2;3	2.32e-58	242.59	12571000000	0	0	0	0	0	0	158560	153190	159040
ELEGEVDSEQK	11	0	1261.57	A0A1D5PUR6;P13538	P13538	1824	1834	no	2;3	2.94e-37	242.59	330670000000	1701200	3833500	4661500	1404700	3575700	3586900	3940500	2830300	3411900
IQLVEEELDR	10	0	1242.65	A0A1D5NT47;F1NK75;A0A1L1RPQ6;Q5ZLJ7;A0A1D5P9B0;A0A1D5P2B9;A0A1D5PV56;A0A1L1RJZ6;P04268;F1NM23;A0A1D5P342;A0A1D5NVL7;Q91968;A0A1D5PSX3;A0A1L1RVF2;A0A1D5P9X2;A0A3Q3ACB9;A0A3Q2U8I1;Q91005;A0A1L1RU52;A0A1L1RVU7;H9L3K0;H9L074;P19352;Q05706;Q8AWI4;A0A452J839;Q90739;Q90740	P04268	92	101	no	1;2;3	1.3e-34	242.59	1214400000000	3758500	4618800	4680600	2819100	4179200	4231200	4004900	3667900	3915000
ELTYQSEEDR	10	0	1268.55	A0A1D5P525;A0A1D5P603;A0A1D5PUR6;A0A1D5NVW6;F1P3X1;P02565;Q9DGM5;R4GIG1	A0A1D5PUR6	1853	1862	no	2;3	1.22e-42	242.59	56809000000	124330	289290	121490	133860	334240	258490	793800	135170	155390
EEAESTLQSFR	11	0	1295.6	F1NJ08;A0A1L1RXL9;P09654	F1NJ08	191	201	yes	2	4.16e-20	242.49	19312000000	198700	247540	222980	166590	315010	307740	343910	169690	161230
EVENVVVTALAGLK	14	0	1440.82	P11009;F1NAD3	P11009	187	200	yes	2;3	1.29e-33	242.48	4724300000	65652	98254	98724	92160	170090	221870	156260	149970	179860
SSVTLTWEPPLIDGGSK	17	0	1785.91	A0A3Q2TS15	A0A3Q2TS15	1402	1418	yes	2;3	2.5e-42	242.48	2949400000	36158	86038	75859	15202	34992	39604	26985	22725	22557
ECQALVSDVDYR	12	0	1453.65	A0A3Q3A4C6;A0A1D5NY50;Q9DEG5;Q9DEH4	A0A3Q3A4C6	666	677	no	2;3	5.36e-53	242.3	30007000000	265240	304080	312220	192010	366290	283230	374910	292900	319440
FIYENNPDAFTDNSVDHFQK	20	0	2400.07	E1BU93	E1BU93	70	89	yes	2;3;4	5.47e-103	242.18	14594000000	162930	246030	275760	130320	134020	236020	272060	352650	359520
FDTGNLCMVTGGANLGR	17	0	1781.82	P47836	P47836	175	191	yes	2;3	9.93e-70	242.07	1065800000	119880	207870	227800	45889	88570	110690	80565	77286	73745
DHMIVQWNEPVNDGGSK	17	0	1924.87	A0A3Q2TS15	A0A3Q2TS15	3955	3971	yes	2;3	3.74e-45	242.07	10755000000	173360	319170	342180	203510	428130	485850	324150	315470	305160
IYAMNSEGLGEPALVPGTPK	20	0	2043.03	A0A3Q2TS15	A0A3Q2TS15	1267	1286	yes	2;3;4	1.28e-66	242.07	19324000000	115110	239380	198790	217540	500470	340890	331480	239530	272800
NYPVVSIEDPFDQDDWAAWK	20	0	2394.08	A0A1D5PSH6;A0A1L1RQQ0;A0A1L1RKH8;A0A1L1RNS0;P51913;F1NZ78	A0A1L1RQQ0	286	305	no	2;3	5.16e-66	242.07	1674200000	29845	113800	90544	18718	28086	44284	90408	230550	157440
NIVAVGAGFCDGLGFGDNTK	20	0	2010.95	A0A3Q8WI14	A0A3Q8WI14	205	224	yes	2;3;4	5.89e-70	241.93	4722300000	55846	149400	129820	34496	77996	87384	239660	314400	283090
VEDISWDMVGGWTGLGGSK	19	0	1992.93	A0A1D5PUQ7;Q90YA3	Q90YA3	435	453	no	2;3	3.1e-57	241.89	1362400000	74470	163080	151050	30148	45795	62361	81868	144020	117040
KATDAESEVASLNR	14	1	1489.74	P04268;F1NM23;A0A1D5P342;A0A1D5NVL7;Q91968;A0A1D5PSX3;A0A1L1RVF2;Q90740	P04268	77	90	no	2;3;4	1.27e-40	241.84	199800000000	807520	1139300	1422800	648010	1481400	986020	1017100	713030	740180
LVDTANFDEYMK	12	0	1444.65	Q6DRR5;F1NUQ3	Q6DRR5	11	22	yes	2;3	2.63e-42	241.54	7024500000	135400	262990	283340	254290	499890	494460	505860	456170	469290
GQTVQQVHNAVGALAK	16	0	1619.87	A0A1D5P525;Q9DGM4;A0A1D5PUR6;F1P3X1	A0A1D5PUR6	416	431	no	2;3;4	1.11e-67	241.52	65447000000	107940	365490	241450	188770	344270	897360	277100	206240	210110
TVLTSSSSSFNK	12	0	1256.62	P14448;F1P4V1	P14448	441	452	yes	2	3.3e-42	241.4	201750000	13382	24330	26326	0	0	0	72361	34161	28927
FSVPDAPEQPVIK	13	0	1425.75	Q07784	Q07784	354	366	yes	2;3;4	1.18e-26	240.8	27141000000	210260	417250	336440	245800	552040	478110	581630	431790	483800
QNAVVQGLTEGK	12	0	1242.66	Q07784	Q07784	18	29	yes	2;3	6.18e-42	240.8	15442000000	174140	366020	347920	145720	424400	345750	398700	281560	295030
IGAGGVDGYLVEWCR	15	0	1650.78	P16419	P16419	755	769	yes	2;3	1.87e-57	240.8	5626800000	107480	223790	136120	179470	197600	283630	87788	287410	236290
AEIGIAMGSGTAVAK	15	0	1374.72	P13585;Q03669;A0A1L1RKB7;A0A3Q2UHS6;Q9YGL9;F1NNV0	P13585	714	728	no	2;3	2.16e-57	240.59	37587000000	627440	1040400	1115800	474100	983520	1066500	1174200	1124800	1102400
VIQYFASIAAIGDR	14	0	1522.81	A0A1D5P600	A0A1D5P600	184	197	yes	2;3	9.53e-50	240.59	2068700000	0	0	0	0	0	0	137750	142470	160530
TVTNAVVTVPAYFNDSQR	18	0	1980.99	A0A1D5PYK0;A0A1D5PFJ6;F1NWP3;A0A1L1RPG0;O73885	A0A1D5PYK0	138	155	no	2;3	5.09e-79	240.46	14454000000	88614	178270	183210	35602	81925	69941	60423	52236	47371
SASALSISGGDEK	13	0	1220.59	Q9DEH4;A0A3Q2U8G4	Q9DEH4	2271	2283	yes	2;3	1.53e-48	240.41	12531000000	275380	650720	735140	185550	687210	459460	483920	353800	385160
QGFTQQIEELK	11	0	1319.67	A0A1D5NYC2;P13538	P13538	1309	1319	no	2;3	9.39e-37	240.37	163080000000	663720	1524800	1916000	409960	949630	940190	1136600	1098100	1173300
ATGEHVTEEDIEDLMKDSDK	20	1	2261	P02588	P02588	125	144	yes	3;4	6.95e-93	240.21	11714000000	183000	383080	603360	136000	226980	479790	142680	242170	201610
IYAENLYGISDPLISDEMK	19	0	2170.05	Q07784	Q07784	331	349	yes	2;3	1.34e-57	240.2	14094000000	202470	512190	479360	182000	370980	510250	455050	484970	464380
TGVTGEQIWLQINEPTPQDK	20	0	2253.13	F1N9Z6;A0A1D5PSF9;Q90724	F1N9Z6	1413	1432	yes	2;3	3.66e-70	240.2	1788800000	97284	232020	225430	4753.9	14687	17980	51877	56057	56967
NLQEEIADLTDQISMSGK	18	0	1990.95	A0A1D5NZY9;Q8UWA0;P79793	A0A1D5NZY9	1512	1529	no	2;3	1.59e-56	240.2	1853200000	0	0	0	0	0	0	274760	154350	125730
FTPVTDSPVQK	11	0	1217.63	A0A3Q2UHZ2	A0A3Q2UHZ2	103	113	yes	2;3	1.7e-20	240.13	16971000000	127790	243620	266580	92772	274060	200140	211160	156210	168870
AYELEQSVVK	10	0	1164.6	A0A1D5P061;A0A1D5PVZ4;E1BQZ7	A0A1D5P061	74	83	yes	2;3	6.04e-33	240.13	10202000000	357740	460680	450520	204650	409110	332280	498710	304880	335210
ILGNPSKEEMNAK	13	1	1429.72	P02604;P02605;F1NZG0	P02604	92	104	no	2;3;4	2.69e-38	240.12	195680000000	1749600	3727900	3799600	614730	1942600	1291000	2341700	1824700	1738100
GIGWSPLGSLDVEK	14	0	1456.76	A0A3Q2UHZ2	A0A3Q2UHZ2	312	325	yes	2;3	7.13e-28	240.12	4097000000	92771	192450	189600	29989	43139	64155	327650	400250	346080
QLEDELVALQK	11	0	1284.69	P04268;F1NM23;A0A1D5P342;A0A1D5NVL7;Q91968;A0A1D5PSX3;A0A1L1RVF2;Q90740	P04268	38	48	no	2;3	3.12e-20	240.1	651660000000	4483700	8034900	8537400	2674000	6146400	5260700	5573500	5125400	5028300
VLQSVQSAVNK	11	0	1171.66	A0A3Q3A948	A0A3Q3A948	124	134	yes	2;3	3.12e-20	240.1	5543500000	64288	141850	178910	39382	64475	113910	101230	113330	113580
ELAEASEDSILK	12	0	1303.65	Q9YH14	Q9YH14	60	71	yes	2;3	2.95e-25	240.08	13542000000	522910	763520	845920	184810	478980	365740	505300	317960	363410
ANSEVAQWR	9	0	1059.51	A0A1D5P525;Q9DGM4;A0A1D5NWE9;A0A1D5P603;A0A1D5PUR6;A0A1D5NVW6;A0A1D5NYC2;A0A1D5P600;Q90WH5;F1P3X1;P02565;P13538;Q910C5;Q90767;Q9DGM5;R4GIG1;Q91411	P13538	1367	1375	no	1;2	8.91e-31	240	520770000000	1254300	1727500	1732800	1167900	2080900	1717400	1902400	1450300	1470200
EGVVGAVGMGGEYGLDSR	18	0	1751.81	A0A1D5PUM7;E1C7I7	A0A1D5PUM7	1416	1433	no	2;3	2.75e-53	239.75	8678700000	195930	304080	335380	128790	282130	242050	217170	194360	199850
AEVSSGSER	9	0	920.42	P05081	P05081	46	54	yes	2	1.03e-30	239.66	267000000000	947640	1077700	1410600	775050	1458900	1286100	995770	665500	737660
AIVAIENPADVSVISSR	17	0	1739.94	P50890	P50890	64	80	yes	2;3	2.93e-51	239.61	921830000	17216	16426	15571	0	0	0	142430	135740	159210
WCTISSPEEK	10	0	1235.55	Q4ADJ7;Q4ADJ6;Q4ADG4;P02789;E1BQC2	Q4ADJ7	28	37	yes	2	7.67e-33	239.6	2337900000	114970	212580	217970	87566	269650	207740	325260	198250	216650
DAVTYTEHAK	10	0	1133.54	P70081;P62801	P70081	69	78	yes	2;3	7.19e-34	239.49	47611000000	211850	358160	430600	352840	833690	817950	896600	551230	634270
DAIAQFESSAVGK	13	0	1321.65	P08250	P08250	51	63	yes	2;3	1.93e-26	239.48	13035000000	308400	397700	498570	163200	393600	392580	382400	294150	280000
AIADSGANVVVTGGK	15	0	1357.72	F1NEF2;A0A1D5PZJ4;A0A1D5NTA5;Q6EE31	F1NEF2	282	296	yes	2	6.28e-36	239.39	279930000	11734	19019	19548	7836.6	18311	14068	46209	37615	33686
GAGTGGLGLAIEGPSEAK	18	0	1583.82	Q90WF0	Q90WF0	1366	1383	yes	2;3	9.08e-79	239.19	1961000000	158530	175860	191220	10394	24376	20332	642160	482350	471800
GQYIGSDDTPELNHAR	16	0	1771.81	A0A3Q3A4C6;A0A1D5NY50;Q9DEG5;Q9DEH4;Q9DEG4	A0A3Q3A4C6	786	801	no	2;3;4	6.54e-121	239.19	33312000000	186000	233270	287930	211590	446180	316360	337490	262930	313390
LDEEFDETTADDR	13	0	1554.63	Q6DRR5;F1NUQ3;Q6VYR1;Q800V4;P80565	Q6DRR5	67	79	yes	2;3	2.8e-48	239.02	22388000000	87005	103120	121870	69620	123590	98242	100460	69553	80671
IAEKDEEIDQLKR	13	2	1585.83	A0A1D5P525;Q9DGM4;A0A1D5P603;A0A1D5PUR6;A0A1D5NVW6;A0A1D5NYC2;F1P3X1;P02565;P13538;Q9DGM5;R4GIG1	P13538	1579	1591	no	2;3;4	3.35e-47	239.02	475980000000	1742500	4649400	4921600	1291900	3142800	3936100	2934300	4136700	3686800
DDTAGELDFSGLLK	14	0	1479.71	P16419	P16419	171	184	yes	2;3	1.98e-49	238.98	11207000000	141720	340520	385870	124960	303390	328070	532840	501190	550730
DSYGASSPWCDYQLR	15	0	1803.75	F1NX83;A0A1D5PF87	F1NX83	1362	1376	yes	2	4.48e-57	238.98	557030000	22686	32168	47638	17964	21093	42635	28437	43107	39419
RLDETDEGQLER	12	1	1459.69	A6BM71;Q98918;Q9IAR9	A6BM71	1170	1181	no	2;3	3.44e-20	238.92	50085000000	167070	148210	163870	132870	141330	138700	169380	145370	164810
PVSPLLLASGMAR	13	0	1310.74	P00565;A0A3Q2U6M6;A0A3Q2U807;P05122;F1NZ30;A0A1L1RT82	P00565	197	209	no	2;3	3.27e-48	238.51	5302000000	45568	122570	168840	42367	71753	120450	73158	73136	73731
HFVALSTNGPK	11	0	1169.62	F1NIJ6;Q5ZMU3;A0A1L1RQ91;A0A1L1RPE8;A0A1D5PRS4	F1NIJ6	213	223	yes	2	1.95e-36	238.51	549550000	60725	126570	60526	22669	44842	78048	148370	210890	190830
QIEQEKSELQASLEEAEASLEHEEGK	26	1	2940.38	A0A1D5P603	A0A1D5P603	1536	1561	no	4	1.47e-124	238.23	1524900000	9916.9	10884	11502	65581	140200	37424	30229	13312	7973.4
GAGEGGLSLAVEGPSK	16	0	1427.73	Q90WF0	Q90WF0	1827	1842	yes	2;3	1.2e-44	238.13	4237100000	281280	360380	378020	100540	149940	138240	321830	236650	220900
GEGGPAGPAGPAGAR	15	0	1220.59	P02467	P02467	693	707	yes	2;3	1.05e-40	237.84	29342000000	352720	112930	386580	258380	136470	354100	394190	116040	181590
GQPLYLTCELNK	12	0	1434.72	A6BM71;A6BLM5;A6BM73;A6BLM6;A6BLM8;A6BLM7	A6BM71	5465	5476	no	2;3	1.68e-20	237.68	19294000000	213480	377910	403710	70793	153090	130120	477600	402470	407760
LTVIAEPIQFTK	12	0	1358.78	A6BLM8	A6BLM8	41	52	yes	2;3	2.11e-41	237.68	3306000000	154480	174370	202560	105060	149070	164990	80397	96290	83577
AMYQNSTLSELK	12	0	1383.67	Q9DEA4;H9KZU7;Q9PUQ7;A0A3Q2UAU4	Q9DEA4	269	280	yes	2;3	4.27e-25	237.37	3740300000	108310	189740	164880	80379	193900	158840	182300	152850	148680
ADEGDYTVEATNESGR	16	0	1712.71	A0A1D5PUM7	A0A1D5PUM7	2334	2349	yes	2;3	1.01e-44	237.32	17528000000	64330	105240	125940	29620	62554	39655	37666	36697	37745
EVDTEDWITANEKPTSHR	18	1	2126.99	F1NNW0;Q02173;A0A1D5PKV3	F1NNW0	841	858	yes	2;3;4	6.9e-79	237.3	66947000000	421730	633730	759310	291710	344990	541940	186120	385390	339870
CYFPQTITQEYEAIK	15	0	1889.89	A0A3Q2UHZ2	A0A3Q2UHZ2	70	84	yes	2;3	1.62e-35	237.3	3316800000	56396	190640	162230	77160	231160	273920	425750	463950	389300
PASDGGSEILGYVLEK	16	0	1633.82	A0A3Q2TS15	A0A3Q2TS15	2196	2211	yes	2;3	6.58e-45	237.3	1657700000	0	0	0	137510	245260	325970	76929	92055	94331
ALQEAHQQTLDDLQVEEDK	19	0	2209.05	A0A1D5NYC2;P13538	P13538	1001	1019	no	2;3;4	1.07e-79	237.21	92140000000	334710	739580	1000700	331250	714920	706870	573420	469280	590240
SADTLWGIQK	10	0	1117.58	P00340;E1BTT8	P00340	319	328	yes	2;3	3.14e-56	237.08	160580000000	1401400	2740300	2877300	634930	1493700	1450700	2463200	2227400	2231300
GLIYETSVLDPDEGIR	16	0	1775.89	A0A1D5PLS2	A0A1D5PLS2	38	53	yes	2;3	9.79e-67	237.08	1993500000	120470	145710	148200	46836	73706	70608	110140	116300	123690
EAGAGGLSIAVEGPSK	16	0	1441.74	Q90WF0;Q90574;F1N8D4;A0A1D5PXM1;A0A3Q2U9M2;A0A1D5NYG3	Q90WF0	2276	2291	no	2;3	1.01e-44	236.92	2555700000	70584	91977	97972	128850	234980	223050	146800	102900	102620
GCPGEVTCLDEAR	13	0	1462.62	A0A3Q2UF40;A0A3Q2UBH6;A0A3Q2UK59;A0A3Q2U788	A0A3Q2UF40	211	223	yes	2;3	4.72e-48	236.92	3971200000	80899	73936	84247	58288	89214	69158	90112	54687	65678
NAGGAVSQPSEPSDAITCRDDIEAPR	26	1	2712.24	A0A3Q2TS15	A0A3Q2TS15	871	896	yes	3;4	3.06e-124	236.77	6425600000	57661	80819	57851	32308	99033	52178	129180	79786	67456
VELSCEVSEDDANVK	15	0	1692.75	A0A1D5PCL3;A0A3Q3AWG5;A0A3Q3A8C1;A0A1D5PBR5;E1C5Z5;A0A3Q2UBY4;A0A1D5PE78;A0A1D5PHW7	A0A3Q2UBY4	356	370	no	2;3;4	7.9e-57	236.61	13526000000	227020	585470	420240	234050	467410	658890	304980	217240	245750
TDYNASVSVPDSSGPER	17	0	1779.79	A0A1D5PXG0;Q5ZIQ3;E1C453;A0A175KE57;A0A1D5PSI3;A0A182C5Y6	A0A1D5PXG0	67	83	yes	2;3	2.36e-45	236.55	1829200000	60171	84454	104400	37296	57405	48189	104590	70065	82781
GVGIISEGNETVEDIAAR	18	0	1828.92	A0A1D5PU80;Q90W81;P24797;P24798	P24797	624	641	no	2;3	8.89e-90	236.4	6110900000	193260	119040	123500	192600	188370	191470	87842	67025	66449
VTEATITGLIQGEEYTFR	18	0	2027.02	A0A3Q2TS15	A0A3Q2TS15	1539	1556	yes	2;3	2.98e-75	236.4	5701200000	71044	121070	111080	39460	54141	70751	20687	36420	33551
ALANSLACQGK	11	0	1131.57	Q92007	Q92007	10	20	yes	1;2;3	4.6e-39	236.06	226700000000	1918000	3429600	3638300	1702200	3815800	3263300	3665600	3231800	3141800
LEAPELDIDSELR	13	0	1498.75	A0A3Q2TS15	A0A3Q2TS15	3455	3467	yes	2	5.5e-48	236.06	1690500000	40690	42343	44722	0	0	0	251220	211330	274350
ASFTNVLETEFTVSGLVEDQR	21	0	2341.14	A0A3Q2TS15	A0A3Q2TS15	4088	4108	yes	2;3	6.91e-93	235.84	2026700000	40795	58490	48049	32754	38676	38241	64399	85923	83436
VIQYFATIAASGDK	14	0	1482.77	A0A1D5P603;P02565;R4GIG1	A0A1D5P603	192	205	no	2;3	9.56e-28	235.73	3766000000	81072	242060	241740	34819	62620	39007	100300	68698	57846
AVTLDESGGGLQTPGGALSLVCK	23	0	2229.13	A0A3Q2UD70;A0A3Q3AKX3;A0A3Q2TTN1;A0A3Q2U8F2;A0A3Q2U7A2;A0A3Q2TXQ0;A0A3Q2TX54;A0A3Q2TUE3;A0A3Q2TTU9;A0A3Q2TT43;A0A3Q2U3K4;A0A3Q2U343;A0A3Q2U287;A0A3Q2TYH6;A0A3Q2U9E1	A0A3Q2TYH6	1	23	no	2;4	1.47e-73	235.71	1546300000	84053	78860	66611	36481	57024	85395	43626	24741	24716
TLEDQLSEIK	10	0	1174.61	A0A1D5P525;Q9DGM4;A0A1D5NVW6;A0A1D5NYC2;P13538	P13538	1254	1263	no	1;2;3	2.64e-18	235.66	1476600000000	5972900	13557000	14486000	3869000	12596000	8881400	12368000	10732000	11272000
SELAYEVLDKGEVR	14	1	1606.82	F1NNW0;Q02173;A0A1D5PKV3	F1NNW0	1008	1021	yes	2;3	1.6e-48	235.31	17864000000	289230	404860	354420	242890	499730	538640	506850	979090	731770
VWCSNCTATDEAPR	14	0	1665.69	A0A3Q2TXL5;F1NED9	A0A3Q2TXL5	88	101	yes	2;3	2.18e-27	235.31	6556200000	145250	292680	223840	42246	108340	151290	115110	67499	100750
ECCEGDMVECMDDMAR	16	0	2006.66	A0A1D5NW68;P19121	A0A1D5NW68	222	237	no	2;3	1.32e-66	235.31	53734000000	120340	150020	191450	82281	158190	148440	98266	61797	75187
DIQDSLTVSNEAQTAK	16	0	1718.83	P28497;A0M8U0	P28497	211	226	yes	2;3	1.14e-44	235.22	9831300000	154960	271180	280810	92231	230070	175380	234360	169150	178680
SVGNLADFEAELK	13	0	1391.69	P08629	P08629	4	16	yes	2;3	6.29e-48	235.21	3741800000	175100	416140	426880	102600	275270	283130	571810	437790	412810
SLVEESQLPEGR	12	0	1342.67	A6BM71;Q98918;Q9YH41;Q9IAR9	A6BM71	1527	1538	no	2;3	1.53e-16	235.06	55508000000	334360	519620	501000	307310	650090	475210	407790	284770	320710
NIHSQVQSVSETPK	14	0	1552.78	P79757	P79757	581	594	yes	2;3	4.85e-33	234.87	3448900000	65353	133890	150830	32057	83985	71959	256490	171160	200740
ISAMNAVGTGEPAVIPSVEIK	21	0	2082.1	A0A3Q2TS15	A0A3Q2TS15	184	204	yes	2;3	3.13e-92	234.82	19332000000	193920	469760	451490	118610	391270	285100	138260	113780	107700
VVFDDTFDR	9	0	1112.51	A0A1D5NTS2	A0A1D5NTS2	69	77	yes	2	2.88e-10	234.82	41120000000	167880	437010	268740	105660	254820	699470	107500	125580	119000
VLYPNDNFFEGK	12	0	1441.69	Q5ZME4;E1BSN7;Q7ZZK3	Q5ZME4	279	290	no	2;3	3.52e-41	234.72	109010000000	958810	1633800	1502400	418670	792930	802280	1254500	1220300	1172900
AVAGNISDPGLQK	13	0	1268.67	P12003;F1NYY0	P12003	803	815	yes	2;3	1.15e-26	234.72	1197600000	148510	301710	314200	56634	116630	98488	216790	175860	176750
SGDGQDDAGELDFSGLLK	18	0	1822.82	A0A1D5PCL3;A0A3Q3AWG5;A0A3Q3A8C1;A0A1D5PBR5;E1C5Z5;A0A3Q2UBY4;A0A1D5PE78	A0A3Q2UBY4	175	192	no	2;3	2.33e-78	234.67	9511100000	116910	649120	381520	103510	456840	896270	425560	315860	336940
NLQMDDFELLCTDGR	15	0	1825.8	Q4ADJ7;Q4ADJ6;Q4ADG4;P02789;E1BQC2	Q4ADJ7	579	593	yes	2;3	1.09e-56	234.52	1171900000	62268	92865	99151	88238	117030	152500	31867	41460	43055
TGAIVDVPVGEELLGR	16	0	1623.88	A0A1L1RY35;A0A1D5PN54;A0A175KE65;Q8UVX3;Q90VX2;A0A1D5PJG9;A0A1L1RZJ6;A0A182C637;A0A1D5P3S4	A0A1L1RY35	134	149	no	2;3	1.49e-66	234.49	28374000000	140540	276380	322020	155330	370350	363290	580110	470290	475570
QIQSLTCEVDALK	13	0	1503.76	F1NJ08;A0A1L1RXL9;P09654;Q49MC0	F1NJ08	316	328	yes	2;3	6.65e-103	234.41	2434600000	124190	308850	273580	95556	179290	205450	263450	177360	161910
PLFDGGAPVTAYTVEYK	17	0	1826.91	A0A3Q2TS15	A0A3Q2TS15	5543	5559	yes	2;3	4.35e-67	234.41	623950000	55142	151080	187300	20644	35294	66699	24556	45397	32461
AITDAAMMAEELKK	14	1	1520.76	A0A1D5P525;Q9DGM4;A0A3Q2UHY4;A0A1D5P603;A0A1D5PUR6;A0A1D5NVW6;A0A1D5NYC2;A0A1D5P600;Q90WH5;F1P3X1;P02565;P13538;Q910C5;Q9DGM5;R4GIG1;A0A1D5NZY9;F1NM49;Q9IBD4;P29616;P79792;Q8UWA0;P79793;Q91411	P13538	1761	1774	no	2;3;4	6.06e-41	234.26	353980000000	2246900	5424600	5485400	1415800	3903100	3782800	5987600	5637100	5566500
KLETDISQIQSEMEDTIQEAR	21	1	2463.18	A0A1D5PUR6	A0A1D5PUR6	1733	1753	no	2;3;4	1.14e-92	234.23	33535000000	92902	772700	269170	161140	256610	1044200	277590	158120	192230
ENVPNIVTVTWEPSTSEK	18	0	2029	A0A1D5PUM7	A0A1D5PUM7	2163	2180	yes	2;3	2.47e-78	234.22	2502600000	71700	144190	140360	52447	115300	107530	143440	194660	169770
NSASSEEEEADAPTTIAR	18	0	1876.83	A0A3Q2UB77;A0A1L1S103	A0A3Q2UB77	47	64	yes	2;3	2.47e-78	234.21	1123800000	13648	16201	24962	5680.3	18897	14521	18327	14236	14925
LVIIEGDLER	10	0	1155.65	Q5ZLJ7;A0A1D5P9B0;A0A1D5P2B9;A0A1D5PV56;A0A1L1RJZ6;P04268;F1NM23;A0A1D5P342;A0A1D5NVL7;Q91968;A0A1D5PSX3;Q91005;A0A1L1RU52;A0A1L1RVU7;H9L3K0;H9L074;Q8AWI4;A0A452J839;Q90739;Q90740	P04268	169	178	no	1;2	2.21e-11	233.57	104020000000	488670	860450	502540	657540	544740	999780	467390	1167600	988870
IAAENIIGMGPFTETTK	17	0	1791.91	Q07784	Q07784	35	51	yes	2;3;4	1.99e-41	233.52	20523000000	119470	236010	233620	54912	123090	96910	351620	291800	286480
DLVPGDIAEVAVGDK	15	0	1496.77	P13585	P13585	144	158	yes	2;3	1.26e-56	233.37	321730000000	643490	1607100	1743900	643800	1649000	1671100	1113900	960230	1104300
GNNVSLDAIPITR	13	0	1368.74	A0A3Q2UHZ2	A0A3Q2UHZ2	173	185	yes	2;3	8.01e-48	233.32	17352000000	382020	448650	456000	172150	303220	261500	385980	313590	332250
DAGTITGLNVMR	12	0	1246.63	Q7SX63;B3VHV2;B6EAX2;P08106;A0A346RQZ3;D6PVB7	Q7SX63	161	172	yes	2;3	4.3e-41	233.09	5536700000	61324	112200	113800	36602	105400	99915	104670	90203	92191
LQTEAGEYSR	10	0	1152.54	A0A1D5P525;Q9DGM4	A0A1D5P525	1285	1294	yes	2	2.77e-32	233.09	54741000000	234900	602220	336870	232130	450890	808050	281310	244980	248970
NQYDNDVTVWSPQGR	15	0	1777.8	A0A1L1RMC0	A0A1L1RMC0	4	18	yes	2	1.37e-56	232.6	436890000	15992	30403	27857	14745	38507	35580	47679	42149	37026
NQVAMNPTNTVFDAK	15	0	1648.79	A0A1D5PYK0;A0A1D5PFJ6;F1NWP3;O73885	A0A1D5PYK0	57	71	no	2;3	2.21e-35	232.6	9323600000	191750	455830	462670	33996	149020	106520	371950	327000	297760
ETYGQLGSSAVLECK	15	0	1640.77	A6BM71;Q98918	A6BM71	3661	3675	yes	2;3	1.38e-56	232.53	9647000000	280780	510270	536800	262020	638450	519000	433890	323540	354130
VLNPDSLAPGYSTPLK	16	0	1670.89	A0A3Q2TYR0	A0A3Q2TYR0	123	138	yes	2;3;4	1.87e-66	232.53	10641000000	183890	294430	338460	45941	94446	96837	105100	83502	82240
GEESLPTTTVDTTTDCTTFK	20	0	2202.98	A6BM71;A6BLM5	A6BM71	7273	7292	yes	2;3	7.43e-67	232.5	33224000000	225880	373460	400250	179890	369240	334920	300650	233450	268890
ATGNPNPDIVWLK	13	0	1423.75	A6BM71;Q98918;Q9IAR9	A6BM71	1307	1319	no	2;3	1.55e-26	232.42	7575700000	72701	124900	121940	117340	189080	207850	0	0	0
SFYPEEISSMVLTK	14	0	1629.8	A0A1D5PYK0;A0A1D5PFJ6;F1NWP3;A0A1L1RPG0;O73885	A0A1D5PYK0	113	126	no	2;3	1.8e-27	232.42	3586500000	51591	110460	102410	0	0	0	81108	85855	78176
DQSLQEELAR	10	0	1187.58	R9PXQ0;P20111;A0A1L1S0L2;A0A1D5PNV5	R9PXQ0	625	634	yes	1;2;3	2.98e-32	232.41	197610000000	339120	486860	522000	374180	777280	634230	816150	594610	633700
VTGLTEGLTYK	11	0	1180.63	Q07784	Q07784	521	531	yes	2;3	5.64e-15	232.41	14776000000	104100	207500	213020	130650	362010	285060	326410	231510	245550
TLEDQLSEFK	10	0	1208.59	F1P3X1	F1P3X1	1257	1266	yes	2;3	2.98e-32	232.41	5351400000	1778.5	11263	5799.7	79301	423870	564250	262040	181070	185210
ETFAAMGR	8	0	881.407	P02609;A0A3Q3A970	P02609	51	58	yes	2	2.92e-29	232.39	318360000000	1675400	2818500	3072600	1465800	3344200	2844100	5247900	4098200	4443600
NQSSLVLIGDAFK	13	0	1390.75	F1NNW0;Q02173;A0A1D5PKV3	F1NNW0	1087	1099	yes	2;3	5.23e-27	232.25	4448800000	63485	223130	184980	12203	34696	48521	89995	112760	98905
LEGDHQLIQEALVFDNK	17	0	1968	R9PXQ0;P20111;A0A1L1S0L2;A0A1D5PNV5	R9PXQ0	698	714	yes	2;3;4	2.09e-45	232.17	32519000000	170480	444170	503930	481770	548790	1195600	220970	590530	528880
LSVTDDKNTVLALNNAILASDIK	23	1	2427.32	A0A3Q3A4C6;A0A1D5NY50;Q9DEH4	A0A3Q3A4C6	1950	1972	no	3	5.31e-160	232.07	0	0	0	0	0	0	0	0	0	0
EATESFASDPITYRPVAIALDTK	23	1	2494.26	A0A1D5P9V0;P00548;F1NW43	A0A1D5P9V0	112	134	no	2;3;4;5	2.26e-107	232.07	130290000000	586730	1111300	1206800	348240	586580	896820	1301800	1394500	1380300
DDSAPQPAGSVDQPLYEVIQEAMQR	25	0	2743.28	F1NX83;A0A1D5PF87	F1NX83	1184	1208	yes	2;3;4	7.99e-124	232.02	16358000000	76970	124770	121850	89118	146210	142980	153260	147200	147750
VPLILGSPDDVHEYLACVQK	20	0	2252.15	A0A1D5PN46	A0A1D5PN46	316	335	yes	3;4	3.22e-92	231.77	4476900000	51663	83995	90820	80112	83578	132180	85583	144930	139900
IEDEQLLGMQLQK	13	0	1543.79	F1P3X1	F1P3X1	1100	1112	yes	2;3	3.01e-26	231.7	1776100000	0	0	0	21662	96634	129490	241580	175010	197960
TFFPEEISSMVLTK	14	0	1627.82	Q7SX63;B3VHV2;B6EAX2;P08106;A0A346RQZ3;D6PVB7;A0A4P8GB30;A0A4P8G8N8;A0A2I4KE16	Q7SX63	114	127	yes	2	1.12e-24	231.67	600680000	43858	128520	171570	15782	21845	80242	40958	71887	51117
STLPATILTKPR	12	1	1296.78	P79757	P79757	324	335	yes	3	1.73e-96	231.67	0	0	0	0	0	0	0	0	0	0
LFYDDPDNPPASEVLR	16	0	1846.87	F1NCU9;Q90952	F1NCU9	290	305	yes	2	2.04e-66	231.67	1084400000	52576	68932	84291	97499	145450	146650	50702	43450	57535
EALTYDGALLGDR	13	0	1392.69	A0A1L1S0V6;F1NYA2;Q5ZMR0	A0A1L1S0V6	95	107	yes	2;3	9.64e-48	231.54	6077100000	117530	116650	127270	157430	215970	208770	299510	230260	222060
SLESTNVTDKDGELYCK	17	1	1957.89	F1NWZ2	F1NWZ2	154	170	yes	3;4	1.43e-90	231.44	1702000000	0	0	0	111640	108510	144000	64321	57975	70400
VLEADPYFTVK	11	0	1280.67	A6BM71;A6BLM5	A6BM71	5895	5905	yes	2;3	5.84e-36	231.38	8038600000	152510	269940	275250	284920	569800	508820	155000	125430	129960
RPVDDGGSEITGYYVER	17	1	1911.9	A0A3Q2TS15	A0A3Q2TS15	30	46	yes	2;3;4	6.64e-121	231.38	40462000000	179990	239370	263340	260900	344860	371390	336080	328540	333090
CNGVLEGIR	9	0	1016.51	A0A1D5P525;Q9DGM4;A0A1D5P603;A0A1D5PUR6;A0A1D5NVW6;A0A1D5NYC2;A0A1D5P600;A0A1D5PFB7;F1P3X1;P02565;P13538;Q910C5;Q9DGM5;R4GIG1;A0A1D5NZY9;F1NM49;Q9IBD4;Q7LZL1;Q8UWA0;Q789A5;Q789A4;A0A1D5NW83;Q789A6;Q02015;A0A1D5NUE9;P14105;A0A1D5PM19;A0A1D5P287;P10587	P13538	698	706	no	2;3	4.64e-30	231.2	229380000000	516110	1561400	745870	325470	1408100	1361200	1637600	1730900	1400900
VMAVNAAGESEPAYVPDPVEVK	22	0	2271.11	Q07784	Q07784	534	555	yes	2;3;4	3e-73	231.13	19772000000	161980	297550	288500	164860	395200	307870	408100	311380	321490
FSNQETCVEIGESVR	15	0	1753.79	F1NIP5;A0A3Q2U465;A0A3Q2U6T2	F1NIP5	35	49	yes	2;3	6.89e-35	231.07	2702900000	253130	288610	343770	175250	279660	256390	178710	120920	141900
ASNVAGTDTCR	11	0	1150.5	A6BM71;Q08476	A6BM71	4391	4401	yes	2;3	8.73e-91	231.07	37922000000	215600	191520	198590	144510	226330	182130	237230	168170	194020
LLLEHTGTPYEDK	13	0	1514.76	A0A1D5P470	A0A1D5P470	18	30	yes	2;3	6.27e-23	231.07	2750400000	36656	75285	93583	20617	39214	72592	63921	85585	83519
TLTTVQGIADDYDK	14	0	1538.75	R4GLE6;A0A1D5P2D3;A0A1D5NYX1;P51971	R4GLE6	43	56	yes	2;3	7.03e-49	231.06	1017000000	91992	199820	213960	7678.8	21778	19556	138930	101210	137660
KLEQNQPIDDMIPAQK	16	1	1866.95	P00565	P00565	366	381	yes	2;3;4;5	5.28e-58	231.06	445590000000	2277700	4680900	5232700	2098800	4811000	4339400	6722800	5061600	5315500
TLALLFASAGGEAESGGGGK	20	0	1791.9	A0A1D5P603	A0A1D5P603	619	638	no	2;3	3.98e-66	230.97	5162400000	25739	78309	58509	54834	99869	57561	445230	229210	169550
ITVTSEVPFSK	11	0	1206.65	Q98TF8;F1N9J4	Q98TF8	70	80	yes	2;3	1.1e-11	230.66	2277700000	167390	295520	286950	82619	201600	170800	205470	145160	150990
GADPEDVIMGAFK	13	0	1348.63	P02609;A0A3Q3A970	P02609	92	104	yes	2;3	4.32e-60	230.65	830230000000	5135900	7745600	8464500	2776400	5120700	4757700	7310900	6418000	6722000
IDAEGLSGLTNLAK	14	0	1400.75	P28675;A0A1L1RX77	P28675	234	247	yes	2;3	2.6e-24	230.59	3249000000	163130	196090	297010	69457	120330	155360	61101	28563	24150
YNLTLENNSGK	11	0	1251.61	A0A3Q2TS15	A0A3Q2TS15	4612	4622	yes	2;3	9.53e-29	230.41	13298000000	208430	421920	418040	162100	413830	369450	395530	303530	309200
EGNDLYHEMIESGVINLK	18	0	2059.99	Q5ZLC5;A0A1L1RY04	Q5ZLC5	247	264	yes	2;3;4	3.28e-62	230.38	16041000000	254470	372980	411440	197320	217530	287900	600690	766430	760890
VLTSFGDAVK	10	0	1035.56	P02112	P02112	68	77	yes	2;3	7.03e-25	230.24	32376000000	360170	552380	591170	270130	449340	493960	234710	167000	179060
ATSFTITDLK	10	0	1095.58	A0A3Q2TS15	A0A3Q2TS15	1249	1258	yes	2;3	7.03e-25	230.24	8099800000	217930	410260	352410	99941	215950	147100	443400	295730	349720
GEVLCTVTTAQPLDEASLTELK	22	0	2374.19	A0A1D5P810	A0A1D5P810	173	194	yes	2;3	4.41e-74	230.16	1814500000	71344	108850	120650	38045	59334	71211	53879	56799	57204
VIQYFATIAASGEK	14	0	1496.79	A0A1D5P525;Q9DGM4;A0A1D5PUR6;A0A1D5NVW6;A0A1D5NYC2;F1P3X1;P13538;Q9DGM5	P13538	193	206	no	2;3	2.72e-41	230.14	30660000000	91029	232280	236140	42167	61733	90781	136440	181340	152140
AQQVSQGLDLLTAK	14	0	1470.8	P12003;F1NYY0	P12003	353	366	yes	2;3	2.72e-41	230.14	1290500000	65790	108180	120310	61961	138040	130250	72073	55361	53149
NENTFLDLTVQQIEHLNK	18	0	2155.09	A0A1D5P0A1;A0A1L1RP39;Q5ZKW4	A0A1D5P0A1	134	151	yes	3	4.69e-71	230.07	700110000	70441	170850	154880	65984	129800	219260	0	0	0
WSQEDQIQDPELVR	14	0	1741.83	A0A1D5PCL0;Q90985	A0A1D5PCL0	1960	1973	no	2;3	2.15e-27	229.97	3358400000	67845	86700	96970	79786	120560	102410	74608	66880	75906
DMTAEQLDEILR	12	0	1432.69	P24797	P24797	666	677	yes	2	1.76e-20	229.68	711430000	55488	48806	47914	60504	92308	76193	51354	40706	36340
YDYEEVDADAAGK	13	0	1444.6	F1NN63;Q2UZR2	F1NN63	428	440	yes	2;3	7.38e-40	229.64	195710000000	1781100	2108300	2467600	1593300	2753200	2174800	2349500	1809300	2153200
DAGEYTCEAAGQK	13	0	1398.57	A0A3Q3A7W0	A0A3Q3A7W0	78	90	yes	2;3	7.38e-40	229.64	29566000000	264160	701480	601190	225290	799480	733900	737170	401830	421000
TEEELSDLFR	10	0	1237.58	P09860;A0A3Q2UF85;A0A452J7Q5	P09860	93	102	yes	2	1.67e-24	229.61	1161100000	18273	22989	24604	42421	47876	115760	127360	98599	106910
KLESDISQIQSEMEDTIQEAR	21	1	2449.16	A0A1D5P603;P02565;R4GIG1	A0A1D5P603	1733	1753	no	2;3;4	1.63e-84	229.59	55809000000	95665	153600	160990	270690	404620	266500	729770	332690	231570
NADGYIDLEELK	12	0	1378.66	P09860;A0A3Q2UF85;A0A452J7Q5	P09860	107	118	yes	2;3	1.99e-20	229.54	21763000000	77964	211180	201310	149290	370490	502570	403200	202630	259150
GVEIETISPGDGR	13	0	1328.66	Q8QGU2	Q8QGU2	2	14	yes	2;3	3.18e-26	229.53	3279300000	118670	103300	101470	105250	146370	123260	200990	145330	125590
FITPLQDQTVK	11	0	1288.7	A6BM71;A6BLM5	A6BM71	5813	5823	yes	2;3	4.82e-15	229.53	21115000000	105420	228220	236080	33454	100130	78830	393380	288930	311770
SFQNNWNVYK	10	0	1298.6	A0A1D5PUQ7;Q90YA3	Q90YA3	365	374	no	2;3	1.87e-24	229.48	5498700000	31204	65944	69522	52423	60385	141860	167130	289910	216610
VIISAPSADAPMFVMGVNHEK	21	0	2212.1	P00356;F1NH87	P00356	117	137	yes	2;3;4;5	1.16e-67	229.32	207130000000	1244100	2184200	2190900	470910	627350	952190	983890	1199800	1096800
ATAGSYIASQTVQK	14	0	1423.73	P34065	P34065	75	88	yes	2	8.46e-61	229.29	105780000	0	0	0	0	0	0	26549	16676	14985
QAFTQQIEELKR	12	1	1489.79	A0A1D5P525;Q9DGM4;A0A1D5P603;A0A1D5PUR6;A0A1D5NVW6;F1P3X1;P02565;Q9DGM5;R4GIG1	A0A1D5PUR6	1310	1321	no	2;3	4.93e-26	229.29	35853000000	115290	483870	309410	34193	83124	172950	351540	191600	140180
SSLQQSDYEYK	11	0	1346.6	Q9DEH4	Q9DEH4	1564	1574	yes	2;3	6.81e-49	229.16	13888000000	167610	366670	378730	161700	534230	367250	696300	472470	515090
ELPDLLGSIGLGK	13	0	1310.74	A0A1D5PLW0;A0A1D5P984;Q90577	A0A1D5PLW0	755	767	no	2;3	6.87e-24	229.16	7735000000	203840	350300	401460	18586	35340	42430	150220	185040	179500
YDITAANSSGTTK	13	0	1327.63	A0A3Q2TS15	A0A3Q2TS15	5983	5995	yes	2;3	1.18e-39	229	18578000000	156330	288510	269290	107030	310030	219840	479710	332800	356590
ADDLEPISELGR	12	0	1313.65	F1NVF2;A0A1D5PHN6;A0A1L1S0H7	F1NVF2	50	61	yes	2	5.58e-33	228.98	2180300000	206180	204600	205250	46097	88555	67748	188180	115330	127430
VVDSLQLTAYK	11	0	1235.68	F1NBV0;Q5ZJF4	F1NBV0	162	172	yes	2;3	5.69e-28	228.98	2680700000	179190	283150	332600	30237	63413	62669	278400	233710	241940
LLPSESALLPAPGSPYGR	18	0	1823.98	F1P593;Q00649	F1P593	57	74	yes	2;3	1.31e-52	228.8	21465000000	120630	142790	201530	33152	57912	79690	89608	105860	92965
AGVGPPSDASNSVMCK	16	0	1575.7	A0A3Q2TS15	A0A3Q2TS15	88	103	yes	2;3	2.65e-121	228.8	7105600000	96644	149460	152110	51505	112190	99403	477440	322500	354000
EVANGLCLEVEGK	13	0	1416.69	P43347	P43347	22	34	yes	2;3	1.29e-59	228.78	2346900000	100550	182970	163010	121340	337180	288860	245400	215910	223450
DAVTSEGQSAR	11	0	1119.52	A6BM71;Q98918	A6BM71	3080	3090	yes	2;3	3.01e-27	228.64	44797000000	87790	137990	144020	119950	245360	177590	200230	130330	156130
KVAEQELLDASER	13	1	1486.76	A0A1D5P603;P02565;R4GIG1	A0A1D5P603	1704	1716	no	2;3	5.06e-32	228.61	48679000000	148840	247750	278510	255040	524700	184960	1007800	289240	263180
DYPVVSIEDPFDQDDWEAWK	20	0	2453.07	P07322	P07322	286	305	yes	2;3;4	2.56e-70	228.38	113540000000	473710	1070900	1146800	569180	702030	1160900	456800	818580	805950
HADSVAELSEQLDNLQR	17	0	1923.93	A0A1D5P600;Q90WH5;A0A1D5PFB7;A0A1D5NXZ4;Q910C5;Q90767;Q91411	Q910C5	1191	1207	no	2;3	3.58e-59	228.19	4452300000	0	0	0	0	0	0	183750	147440	160230
DEGPENLTQAHEDAK	15	0	1652.73	Q6B344;A0A1D5PY67;E1BWX1;P51901	Q6B344	508	522	yes	2;3;4	8.63e-49	228.19	9711100000	144290	142090	164640	90218	143390	137500	198760	138920	153450
SVPVAVESAGPGLHR	15	0	1474.79	Q90WF0	Q90WF0	1000	1014	yes	2;3	5.58e-30	228.12	3404600000	80679	122060	147720	81737	168400	150240	140920	106200	124340
AVNPLGEASVDCK	13	0	1358.65	Q05623;E1C597	Q05623	518	530	yes	2;3	1.29e-26	228.12	48282000000	502330	723710	786120	352140	799010	542960	771540	505220	508550
TPGAMEHELVLHQLR	15	0	1729.89	A0A1D5P525;Q9DGM4;A0A1D5P603;A0A1D5PUR6;A0A1D5NVW6;A0A1D5NYC2;F1P3X1;P02565;P13538;Q9DGM5;R4GIG1	P13538	683	697	no	2;3;4	2.63e-35	228.12	202900000000	603570	1265500	1251800	902480	2045800	1781800	1800900	1714100	1678200
VCIVGSGNWGSAIAK	15	0	1517.77	A0A3Q8WI14	A0A3Q8WI14	6	20	yes	2;3	7.31e-35	228.07	6690300000	255950	435490	611630	19375	27314	49190	48786	57834	47346
KELQAAGLSGDALEK	15	1	1528.81	F1NIJ6;Q5ZMU3;A0A1L1RQ91;A0A1L1RPE8;A0A1D5PRS4	F1NIJ6	418	432	yes	2;3;4	8.5e-111	228.03	24643000000	159310	326400	357280	166810	515660	373800	296110	222110	238350
TSLADMCFVEEQNSVYCER	19	0	2336.97	A0A3Q2U481	A0A3Q2U481	117	135	yes	2;3	1.45e-51	228.03	12805000000	216210	328560	338750	202660	367360	383030	435530	398640	389130
DGSTDWTAVNK	11	0	1192.54	Q05623;E1C597	Q05623	176	186	yes	2;3	2.07e-11	227.99	15127000000	284230	550830	566940	256570	554810	409980	839560	567340	611480
TADFSTVLVNK	11	0	1193.63	A0A3Q2TS15	A0A3Q2TS15	948	958	yes	2;3	9.33e-28	227.88	19492000000	184790	460730	454400	93182	278090	216420	424000	302760	310340
ENQSMLITGESGAGK	15	0	1520.71	A0A1D5NZY9;F1NM49;Q9IBD4;Q7LZL1;Q8UWA0	A0A1D5NZY9	170	184	no	2;3	4.11e-48	227.63	1459500000	0	0	0	65908	427480	147930	68396	54474	55756
GAAQNIIPASTGAAK	15	0	1368.74	P00356;F1NH87	P00356	199	213	yes	2;3;4	5.88e-57	227.57	374490000000	2856400	4196800	4784500	2008900	4229000	3675400	5352700	4385700	4436800
NCTVNEYVNSTLR	13	0	1568.73	A0A1D5P5M6;E1BQD1	A0A1D5P5M6	133	145	yes	2	2.56e-26	227.48	640850000	5955.3	53656	27625	5364.2	23481	16504	78335	33682	91355
SAESEKEMANMKEEFEK	17	2	2015.88	A0A1D5P525;Q9DGM4;A0A1D5PUR6;A0A1D5NVW6;A0A1D5NYC2;P02565;P13538;Q9DGM5;R4GIG1	P13538	845	861	no	3;4;5	4.84e-59	227.4	137990000000	913910	2568100	2113500	544950	2139400	1748400	1508300	1959600	1391400
YISPDQLADLYK	12	0	1424.72	A0A1D5PSH6;A0A1L1RQQ0;A0A1L1RKH8;A0A1L1RNS0;F1NZ78	A0A1L1RQQ0	270	281	no	2;3	8.39e-20	227.37	12346000000	196880	435530	437660	69890	166700	172880	145640	121280	104170
EQTMLPEFDLR	11	0	1377.66	A0A3Q2TS15	A0A3Q2TS15	494	504	yes	2;3	1.11e-27	227.36	24444000000	321170	398030	394850	404780	634890	614550	496780	428730	439310
DLQINVEHLTEK	12	0	1437.75	A0A1D5PUQ7;Q90YA3	Q90YA3	592	603	no	2;3	3.21e-20	227.31	45234000000	350440	414210	538280	261580	229780	398620	265060	361350	428220
AALEALDELDLFGAK	15	0	1574.82	A0A1D5P061;A0A1D5PVZ4;E1BQZ7	A0A1D5P061	207	221	yes	2;3	4.53e-48	227.31	993420000	39355	70996	58943	48594	59974	86568	250200	463540	388290
QLSSGISEIR	10	0	1088.58	F1P593	F1P593	79	88	yes	2	6.51e-17	227.27	14084000000	71940	96868	103370	90986	226830	196430	173330	137530	152180
ELISNSSDALDK	12	0	1290.63	P11501;A0A1D5PUL6;A0A1D5P5R0;A0A1L1RND0;Q5ZIC0;Q2XQE5;Q5ZKZ3;Q5ZMA5	P11501	46	57	yes	2;3	6.66e-20	226.73	15880000000	321330	504640	521830	245420	597430	423740	519220	375760	342080
WNTDNTLGTEIAIEDQIAK	19	0	2131.04	F6T197;Q9I9D1	Q9I9D1	75	93	no	2;3	3.08e-53	226.67	8003400000	237790	347060	351810	117170	212200	226690	337870	325400	313090
LYVEPVAPTATPGYMPGPEVMR	22	0	2374.17	A6BM71;Q98918;Q9IAR9	A6BM71	1123	1144	no	2;3;4	3.06e-73	226.65	4512600000	105800	151460	160680	33208	49719	50147	190020	131490	128210
SAGYGGLGLSVEGPSK	16	0	1477.74	Q90WF0	Q90WF0	2009	2024	yes	2	7.85e-58	226.59	1474900000	54751	109120	111590	30276	70327	71555	76675	52696	49950
CELLYEGPPDDEAAIGIK	18	0	1988.94	Q90705;A0A1D5PS29;B4ZAD9	Q90705	369	386	yes	2;3	1.68e-51	226.59	1566400000	29224	80403	81666	39482	137620	112580	135590	116310	115990
ASLTLTHANK	10	0	1054.58	F1N9Z6;A0A1D5PSF9;Q90724	F1N9Z6	467	476	yes	2;3	1.35e-11	226.59	4996500000	90360	136870	174670	17535	29406	26709	72792	63893	81470
ATVVESSEK	9	0	948.476	Q5F3W6;F1NMY1;A0A3Q2U4C6	Q5F3W6	144	152	yes	2;3	7.61e-22	226.46	13879000000	443730	674730	718260	269860	618910	501200	690860	483640	549310
GGMESVEVFTTEGK	14	0	1469.67	F1P5R7;A0A1L1RPT1	F1P5R7	4	17	yes	2;3	2.08e-40	226.4	1953700000	69897	113530	145740	73616	155830	168420	187420	178390	238500
NMMQIQSDNVYK	12	0	1469.66	A0A3Q2UHZ2	A0A3Q2UHZ2	292	303	yes	2;3	1.4e-32	226.4	4226300000	74285	213090	224650	60988	185990	181060	262000	213650	207120
LATATFAGIENK	12	0	1234.66	A0A1D5PP62;A0A1D5PSJ5	A0A1D5PP62	642	653	yes	2;3	5.03e-16	226.4	2450900000	112660	191120	192700	48880	116350	98419	210030	144560	154880
VPDLLEGCQYEFR	13	0	1624.76	Q07784	Q07784	418	430	yes	2;3	3.03e-39	226.33	26264000000	207420	376530	327260	171630	250690	275480	274160	302490	288030
KKLETDIVQIQSEMEDTIQEAR	22	2	2603.31	A0A1D5NYC2;P13538	P13538	1731	1752	no	4	6.26e-98	226.29	10178000000	0	0	0	34611	51741	34653	0	0	0
AAVEQLTEEQK	11	0	1244.62	P09860;A0A3Q2UF85	P09860	7	17	yes	2;3	3.31e-21	226.29	61889000000	626980	756360	797730	570030	942940	1651900	1511800	856220	1107900
DYPVVSIEDPFDQDDWEAWKR	21	1	2609.17	P07322	P07322	286	306	yes	2;3;4	5.66e-84	226.23	34545000000	242750	596020	267150	248320	411640	327460	247160	922020	656990
NGSGIDVDEAPDLQK	15	0	1556.73	F1NNW0;Q02173;A0A1D5PKV3	F1NNW0	1154	1168	yes	2;3	4.27e-31	226.23	12078000000	133310	347680	265650	79731	287900	241000	250200	217920	209700
NVSSLVSENK	10	0	1075.55	A0A3Q3A4C6;A0A1D5NY50;Q9DEH4	A0A3Q3A4C6	1998	2007	no	2;3	1.77e-11	226.2	11226000000	99351	218490	256010	119050	465670	308730	458000	322980	338860
AAPTENATLSCEVGQEK	17	0	1803.83	A0A3Q3A7W0	A0A3Q3A7W0	116	132	yes	2;3;4	1.98e-42	226.19	28580000000	281790	436440	393720	193350	421920	320420	490870	357770	399480
DVSTEFTVDAR	11	0	1238.58	Q90WF0	Q90WF0	1257	1267	yes	2	1.52e-27	226.09	2726500000	106610	116550	131670	73917	124520	113470	177090	118020	129980
DDGNAAITGYTIQK	14	0	1465.7	A0A1D5PCL3;A0A3Q3AWG5;A0A3Q3A8C1;A0A1D5PBR5;E1C5Z5;A0A3Q2UBY4;A0A1D5PE78;A0A1D5PHW7	A0A3Q2UBY4	972	985	no	2;3	1.91e-27	226.04	5553800000	130170	403220	274510	101780	309280	444780	133890	110200	125500
LVIPSVTEANSGR	13	0	1341.73	A6BM71;Q98918;A0A3Q2UG28;Q9IAR9	A6BM71	65	77	no	2;3	3.31e-39	225.93	8311500000	103570	177340	185650	64663	148460	135200	177050	146420	154290
LCGGDDDAAGEFFPEAAQVAYR	22	0	2358.02	Q6B344;A0A1D5PY67;E1BWX1	Q6B344	318	339	yes	2;3	2.07e-107	225.85	7022400000	185880	270680	298570	121280	211290	191810	145370	113210	116270
DLVPGDIAEVAVGDKVPADIR	21	1	2148.14	P13585	P13585	144	164	yes	2;3;4	4.67e-116	225.7	107400000000	373120	669380	607490	300590	699220	639080	1085900	1205900	1086100
YADLTEDQLPTCESLKDTIAR	21	1	2438.16	Q5ZLN1;F1NHM9	Q5ZLN1	142	162	yes	2;3;4	1.01e-83	225.69	35077000000	566310	708730	473800	294760	911670	433450	596030	498260	375050
KAEIGIAMGSGTAVAK	16	1	1502.81	P13585;Q03669;A0A1L1RKB7;A0A3Q2UHS6;Q9YGL9;F1NNV0	P13585	713	728	no	2;3	1.51e-105	225.67	2305000000	20591	45069	54328	75468	95918	93729	228950	216040	221610
LIIHGCTLDDAK	12	0	1354.69	A6BM71;A6BLM5	A6BM71	6578	6589	yes	2;3	9.64e-17	225.67	7870700000	231670	375680	365350	94095	157590	177280	254790	285180	279470
ELEELSER	8	0	1003.48	A0A1D5NZY9;F1NM49;P29616;Q8UWA0	A0A1D5NZY9	1150	1157	no	1;2;3	2.26e-25	225.57	768030000000	2404200	3333900	3387400	2039700	4427600	3098600	4647500	3388900	3647800
FNTANGGPAPEGITDK	16	0	1587.75	F1NN63;Q2UZR2	F1NN63	131	146	yes	2;3	9.83e-58	225.55	38051000000	362820	645650	399810	197260	447090	368030	663750	576140	535800
YEETQAELEASQK	13	0	1524.69	A0A1D5P525;Q9DGM4;A0A1D5P603;A0A1D5NVW6;F1P3X1;P02565;Q9DGM5;R4GIG1;A0A1D5NZY9;Q8UWA0;P79793	A0A1D5P603	1464	1476	no	2;3	7.43e-27	225.33	93810000000	436610	930440	880350	477570	1142400	1124100	1969600	771880	774280
DINAYNGDQPVEK	13	0	1461.67	F1NBV0;Q5ZJF4	F1NBV0	84	96	yes	2;3	3.8e-39	225.23	5124300000	123210	176200	142490	71449	161230	145620	340820	270530	296570
YSGGSPILGYYIDK	14	0	1531.76	F1NNW0;Q02173;A0A1D5PKV3	F1NNW0	724	737	yes	2;3	1.12e-24	225.13	1418500000	70149	194250	209610	63713	113640	180550	106840	185800	144710
SLMGQYTCTASNAIGTASSSGK	22	0	2190.99	A6BM71;Q98918;Q08476	A6BM71	4093	4114	yes	2;3	6.01e-81	225.13	4025200000	47903	114170	122910	7335.4	16105	14623	175910	127380	127270
KDLYANNVMSGGTTMYPGIADR	22	1	2373.11	P68139;A0A1D5PK53	P68139	293	314	yes	2;3;4	1.99e-85	225.11	104320000000	628190	1278000	1310300	322890	521440	671990	842950	947470	862950
AVFPSIVGR	9	0	944.544	P08023;F1P476;P63270;A0A3Q3AWV3;A0A1D5NV17;A0A3Q3A5C8;P60706;P53478;A0A1L1RPY3;B5M200;Q90736;P68034;A0A1L1RU07;P68139;A0A1L1RPH2;Q5ZMQ2;A0A1D5P5D1;Q5ZLX9	P68139	31	39	no	2;3	4.08e-39	225.08	196920000000	0	0	0	593190	666010	1599300	1357100	2096100	1983400
LDNLETTADLTIEAEPIQFTK	21	0	2361.2	A6BM71;A6BLM5;Q08476;A6BM73	A6BM71	4787	4807	yes	2;3	2.57e-83	224.86	1042100000	9862.4	31313	25823	38349	50847	64533	73753	74396	81555
EREEEPAFDIDSEMR	15	1	1851.79	A0A3Q2TS15	A0A3Q2TS15	5615	5629	yes	2;3	3.59e-48	224.86	55257000000	171810	171590	186270	107320	106270	139900	110560	125960	139580
CVLSWLPPLDDGGAK	15	0	1626.81	A0A3Q2TS15	A0A3Q2TS15	1008	1022	yes	2;3	7.87e-48	224.82	4561600000	26506	60538	58111	54619	140470	191020	108700	132200	112230
LDSTASISAK	10	0	991.519	F6T197;Q9I9D1	Q9I9D1	227	236	no	2;3	6.56e-08	224.7	6627200000	236360	357320	384720	82716	195020	187160	664310	478080	521100
INSVNQSDLK	10	0	1116.58	A0A3Q3A4C6;A0A1D5NY50;Q9DEG5;Q9DEH4;Q9DEG4	A0A3Q3A4C6	767	776	no	2;3	9.24e-24	224.68	13629000000	249980	434910	423810	124450	378660	274920	619750	444420	457470
GLVYETSVLDPDEGIR	16	0	1761.88	P23007	P23007	50	65	yes	2;3	1.15e-57	224.66	2748500000	0	0	0	0	0	0	18381	19257	20318
TGTAEVSSILEER	13	0	1390.69	A0A1L1RY35;A0A1D5PN54;A0A175KE65;Q8UVX3;A0A1D5PJG9;A0A1L1RZJ6;A0A182C637;A0A1D5P3S4	A0A1L1RY35	46	58	no	2;3	4.19e-39	224.66	28066000000	307500	382920	407860	183210	361970	332100	503470	348590	349700
AVDDYSLNAGK	11	0	1151.55	F1NZJ2;Q5F3F7;Q8AYP8	Q8AYP8	728	738	no	2;3	2e-27	224.64	2009900000	103870	155970	145590	118840	319610	230180	240780	162590	173200
GTATFTCDIVK	11	0	1211.59	A6BM71;A6BLM5;A6BM73;A6BLM8	A6BM71	5558	5568	no	2;3	2e-27	224.64	15089000000	312190	536080	523010	235030	541680	420870	196560	153420	158700
QKYEETQAELEASQK	15	1	1780.85	A0A1D5P525;Q9DGM4;A0A1D5P603;A0A1D5NVW6;F1P3X1;P02565;Q9DGM5;R4GIG1;A0A1D5NZY9;Q8UWA0;P79793	A0A1D5P603	1462	1476	no	2;3;4	3.75e-48	224.59	125720000000	345520	1176800	849560	298690	1107600	1042800	2902100	820270	671040
SLVFQPLTELK	11	0	1273.73	A0A1D5PUQ7;Q90YA3	Q90YA3	705	715	no	2;3	2.02e-27	224.58	31914000000	277640	564320	510590	97666	203750	244830	550950	573740	525950
IDNMEDCATLR	11	0	1336.58	P16419	P16419	907	917	yes	2;3	2.02e-27	224.58	104050000000	503890	686240	755930	508740	1106900	824560	1010300	736090	846180
EGLELPEDEEEK	12	0	1415.63	A0A1D5PHC5;F1NC33;Q04619;P11501;A0A1D5PUL6;A0A1D5P5R0;A0A1L1RND0	P11501	543	554	no	2;3	4.81e-20	224.58	8041900000	47608	119130	126140	66601	214990	159140	152370	106020	106690
YVSASPGGVYATK	13	0	1298.65	F1NJ08;A0A1L1RXL9;Q49MC1	F1NJ08	47	59	yes	2	4.36e-39	224.42	2754800000	17333	28891	23757	15125	31427	34838	51858	26510	23319
AVFECEVANPESEGQWLK	18	0	2091.96	A6BM71;Q98918;Q9YH41	A6BM71	2364	2381	no	2;3	3.99e-51	224.42	2262500000	19812	37926	42572	0	0	0	168540	174090	165990
CNIFPIETTTYK	12	0	1485.72	A0A1D5PUM7	A0A1D5PUM7	2006	2017	yes	2;3	1.01e-16	224.42	4117700000	76139	234620	238730	21506	85427	71392	104490	134350	108330
LQDAEEHVEAVNSK	14	0	1567.75	A0A1D5P603;P02565;R4GIG1	A0A1D5P603	1401	1414	no	2;3;4	3.04e-40	224.42	254110000000	781240	1185900	1177800	808900	1831000	803680	3034900	1258800	1291400
VDVLENQVMDFR	12	0	1463.71	A0A1D5P470	A0A1D5P470	96	107	yes	2;3	2.04e-32	224.42	7217600000	198820	186440	205680	186130	258140	295770	207720	232700	241700
DLETVMFDR	9	0	1124.52	F1NN63;Q2UZR2	F1NN63	444	452	yes	2	1.14e-21	224.36	174760000000	1000800	1439100	1699600	607840	967450	1149100	1420900	1435200	1514500
IADIEASLSTLAEK	14	0	1459.78	A0A3Q2TWS9;F1NJ23	A0A3Q2TWS9	1128	1141	yes	2	6.39e-24	224.24	85109000	31601	54065	57440	0	0	0	0	0	0
LQDYTAVEKDEVILQCEISK	20	1	2380.18	A6BM71;A6BLM5	A6BM71	6261	6280	yes	3;4	3.81e-83	224	7357600000	246100	684780	664790	263850	300910	522190	166060	497880	407440
NEHCNENYTTDFIYNLYTEEGK	22	0	2753.16	A0A1D5PUQ7;Q90YA3	Q90YA3	616	637	no	2;3;4;5	1.79e-98	223.97	26345000000	167110	736470	515200	345960	794950	1143700	371800	931740	710220
IVVGPSEIGNAER	13	0	1339.71	Q90WF0	Q90WF0	1972	1984	yes	2;3	4.81e-39	223.77	5032500000	292700	419840	431190	115250	215820	206080	356810	285800	292140
VSAENAAGVGEPSEPSIFYR	20	0	2078.99	A0A3Q2TS15	A0A3Q2TS15	4412	4431	yes	2;3	7.69e-64	223.7	26185000000	167680	290080	248000	116290	263870	234710	108960	92463	97368
CECEVGYELDR	11	0	1428.57	F1NII7;P87363	F1NII7	1468	1478	yes	2	2.44e-27	223.31	2944900000	23026	52953	55507	48173	183130	150790	130200	91769	93706
AFEEAAEHFQPYVK	14	0	1664.78	A0A140F3I0;A0A140F3H9;A0A140F3H8;A0A140F3H6;A0A3Q2TXF6;P19204;F1NQT9	A0A140F3I0	149	162	yes	2;3;4	1.24e-24	223.31	127880000000	322110	684130	709560	174750	270420	360510	737100	785020	765750
MINDLNTQR	9	0	1103.54	A0A1D5P525;Q9DGM4;A0A1D5NYC2;P13538;Q7LZL0	P13538	1272	1280	no	1;2;3	6.91e-40	223.19	487690000000	2009500	2856700	3059900	1589500	3304900	2330800	2385500	2016800	2171100
ELPPEQAQYCIK	12	0	1474.71	R9PXQ0;P20111;A0A1L1S0L2;A0A1D5PNV5	R9PXQ0	856	867	yes	2;3	1.46e-25	222.74	34609000000	948560	1562800	1551700	798060	1931200	1494800	1703800	1269400	1319400
ILAQMTGTEFMQDPDEEALRR	21	1	2450.16	A0A1D5P909	A0A1D5P909	230	250	yes	3;4	1.19e-83	222.6	7350200000	102080	155940	171880	121630	174290	223390	227240	301140	274230
VGLIGSCTNSSYEDMGR	17	0	1844.8	Q8AYI3;Q5ZMW1	Q8AYI3	381	397	yes	2;3	2.96e-39	222.56	1484000000	64533	144250	106170	100120	170470	186600	95704	65144	71102
NNPNPDQLNDIACLGMPR	18	0	2037.94	P20785;A0A1D5PWN6	P20785	760	777	yes	2;3	2.36e-69	222.56	1665500000	71827	141540	159700	72970	153070	163300	128590	101740	104480
NYEPIEDDSR	10	0	1236.53	F1N9Z6;A0A1D5PSF9;Q90724	F1N9Z6	1080	1089	yes	2	1.29e-23	222.28	15918000000	68539	182040	221950	62471	176920	166270	162990	125400	161360
LMLEMDGTENK	11	0	1279.58	A0A1D5PSH6;A0A1L1RQQ0;A0A1L1RKH8;A0A1L1RNS0;P51913;F1NZ78;Q5ZIQ4	A0A1L1RQQ0	93	103	no	2;3	1.68e-11	222.28	9627400000	191340	300830	318980	356550	702850	618630	578480	448540	456190
LEVEANNAFDQYR	13	0	1567.73	P14315;A0A1D5P9M3;A0A452J864	P14315	96	108	yes	2;3	5.9e-39	222.2	2636000000	134630	139750	138160	107720	145790	158880	147820	146320	148040
YEFGIFNQK	9	0	1144.56	Q5ZME4;E1BSN7	Q5ZME4	162	170	yes	2;3	1.52e-09	222.19	30178000000	126070	304500	318980	96443	125060	214580	215680	342270	257810
IYSLNEGYAK	10	0	1156.58	A0A1D5PN46;Q9I8D3	A0A1D5PN46	210	219	yes	2;3	2.41e-11	222	8860700000	71721	116860	130450	53730	133930	108670	180100	133580	143440
LLGSIDIDHTQYK	13	0	1501.78	F1P3X1	F1P3X1	751	763	yes	2;3;4	6.9e-24	221.91	29943000000	164560	707810	454310	146950	360390	910000	159210	56210	39715
LETDISQIQSEMEDTIQEAR	20	0	2335.08	A0A1D5PUR6	A0A1D5PUR6	1734	1753	no	2;3	2.79e-83	221.91	14080000000	20697	52726	32403	34459	70501	434730	0	0	0
QEYDESGPSIVHR	13	0	1515.7	P60706;P53478;Q5ZMQ2;A0A1D5P5D1	P60706	360	372	no	2;3	2.4e-49	221.6	24912000000	346220	367690	403320	302790	601410	469800	430140	314330	361450
LYQSTLLQDGLK	12	0	1377.75	A0A1D5P0B5	A0A1D5P0B5	13	24	yes	2	2.95e-32	221.6	837510000	13828	28984	31560	33853	79199	82220	159800	150060	138730
DLIELQALIDSHFEAR	16	0	1868.96	A0A1L1RXW8;P12620;A0A3S5ZPU4;Q7ZZH5;O57559	A0A1L1RXW8	31	46	no	2;3	1.6e-46	221.59	18601000000	73234	165390	91656	134920	198570	212300	179010	311970	281670
NSLESYAFNMK	11	0	1302.59	A0A1D5PYK0;A0A1D5PFJ6;F1NWP3;A0A1L1RPG0	A0A1D5PYK0	540	550	yes	2	3.01e-27	221.59	1645900000	31933	128470	89860	37767	117500	86218	138130	110530	86355
STDFATSLSVK	11	0	1154.58	A0A3Q2TS15	A0A3Q2TS15	2030	2040	yes	2;3	7.39e-15	221.52	3581000000	118650	251610	251420	83098	248360	175700	153610	112130	112180
SQCIMEAEFDEKPADLPSLVEK	22	1	2535.19	A0A1D5NW68;P19121	A0A1D5NW68	265	286	no	2;3;4	4.44e-98	221.39	39687000000	321320	962010	1193900	141460	392590	639050	708640	679340	658940
IPYFPANQEILQK	13	0	1559.83	F1NVD4	F1NVD4	385	397	yes	2;3	1.17e-22	221.32	4294800000	130240	207240	180170	57442	84844	123800	294010	381810	298430
GKSEEELANCFR	12	1	1438.65	P02588	P02588	93	104	yes	2;3	2.51e-19	221.28	86306000000	411210	682520	939740	213560	316100	362800	481580	530770	491250
VLAVNEYGAGLPAETPEPIK	20	0	2067.09	A0A3Q2TS15	A0A3Q2TS15	4708	4727	yes	2;3;4	5.51e-64	220.6	26975000000	363440	699930	691320	267500	610310	489830	507410	423130	408060
NAATEDLWESLEK	13	0	1504.7	A0A3Q2UDT6;A0A1D5PKA9	A0A3Q2UDT6	602	614	yes	2;3	7.06e-39	220.53	661460000	34623	85967	92586	45044	142440	130700	95467	84122	82604
STGLSDGIAYEFR	13	0	1414.67	A0A3Q2TS15	A0A3Q2TS15	756	768	yes	2;3	7.08e-39	220.5	28450000000	492590	795620	855120	459020	875660	867760	787440	667330	686530
LTQVSVADSGEYVCR	15	0	1682.79	A0A1L1RJ69;A0A3Q2UIW4;A0A3Q2TRR9;A0A3Q2UCG1;A0A1D5P806;A0A1D5PF99;Q6KDZ1	Q6KDZ1	2489	2503	no	2	9.94e-31	220.4	324750000	19770	20128	21983	20301	30903	32530	25507	19945	17863
VLDTPGPPQNLIVK	14	0	1489.85	A0A3Q2TS15	A0A3Q2TS15	3548	3561	yes	2;3	2.63e-24	220.29	17157000000	248520	441870	413860	98214	219340	215600	205840	168930	166330
GPVTPSTFLESCGVADLITTCYGGR	25	0	2657.25	A0A3Q8WI14;A0A1D5PA73	A0A3Q8WI14	245	269	yes	2;3;4	3.55e-97	220.27	14421000000	122100	173690	160720	59448	49167	76977	135770	178360	153850
NWHEVNSSVISR	12	0	1426.7	F1NNW0;Q02173;A0A1D5PKV3	F1NNW0	744	755	yes	2;3	3.39e-32	220.25	6419800000	39406	90419	97185	55021	108300	125870	61178	75938	77111
APAAAGAQGEGEK	13	0	1155.55	A2NBE2;E1BX17	A2NBE2	330	342	no	2;3	7.25e-39	220.25	4198600000	246690	379960	411220	120170	236490	243360	297490	174100	202870
TIADGFTAMVDK	12	0	1267.61	A0A1D5NW68;P19121	A0A1D5NW68	524	535	no	2;3	8.28e-17	220.25	25190000000	338450	649550	799700	176210	385130	442100	446730	348510	371240
ALHPDMGTDADKEHWK	16	1	1849.84	P00340;E1BTT8;A0A1D5NZ01	P00340	213	228	yes	2;3;4;5	3e-58	220.21	160340000000	748820	1606700	1962000	393070	548810	825360	824090	1736200	1440500
ALQEAHQQTLDDLQAEEDK	19	0	2181.02	A0A1D5P525;Q9DGM4;A0A1D5P603;A0A1D5PUR6;A0A1D5NVW6;F1P3X1;P02565;Q9DGM5;R4GIG1	A0A1D5PUR6	1002	1020	no	3;4	2.16e-70	220.04	14389000000	159680	321270	225960	152970	225170	389630	345310	122830	130440
VTVVQDTPEMLR	12	0	1386.72	A0A3Q3A4C6;Q9DEH4	A0A3Q3A4C6	2484	2495	no	2;3	3.49e-32	219.93	23475000000	153930	259560	259820	188330	396450	331660	461620	356220	373280
VTGLDEGLMYEYR	13	0	1544.72	A0A3Q2TS15	A0A3Q2TS15	5084	5096	yes	2;3	7.48e-39	219.93	12419000000	375640	649710	636280	270780	439910	526080	139440	149320	143390
AVLVDLEPGTMDSVR	15	0	1600.81	F1NYB1;P09206;P09653	F1NYB1	63	77	yes	2;3	4.85e-29	219.92	2921700000	187550	228600	261880	89574	162760	155540	315480	293640	289120
GGGGNFGPGPGSNFR	15	0	1376.62	A0A3Q2U0R8;A0A3Q2U3U3;Q5ZME1;F6T6F1;A0A1D5PVH5	A0A3Q2U0R8	210	224	yes	2	1.44e-47	219.92	315920000	10409	10194	12127	22612	31397	32351	20257	16127	15562
DNQPLDTSR	9	0	1044.48	Q05623;E1C597	Q05623	275	283	yes	2	1.95e-21	219.8	73107000000	327780	393720	393240	225730	482970	238600	738530	477570	512220
ADIAESQVNK	10	0	1073.54	A0A1D5P525;Q9DGM4;A0A1D5P603;A0A1D5PUR6;A0A1D5NVW6;Q90900;A0A1D5NYC2;F1P3X1;P02565;P13538;Q9DGM5;R4GIG1	P13538	1913	1922	no	2;3	3.61e-56	219.7	1048000000000	4836500	7744100	8337000	4122700	8761500	6758500	8643400	6465800	7049600
AGFAGDDAPR	10	0	975.441	P08023;F1P476;P63270;A0A3Q3AWV3;A0A1D5NV17;A0A3Q3A5C8;P60706;P53478;A0A1L1RPY3;B5M200;Q90736;P68034;A0A1L1RU07;P68139;A0A1L1RPH2;Q5ZMQ2;A0A1D5P5D1;Q5ZLX9	P68139	21	30	no	1;2;3	4.46e-34	219.51	1824200000000	5556600	6484100	6874800	5206700	9993500	7505300	10186000	7411000	8075400
SSGCSTPSGIDCGSGR	16	0	1583.63	F1NHA9	F1NHA9	132	147	yes	2;3	2.15e-57	219.43	17382000000	46194	93044	100650	44589	127560	102970	147550	108100	106300
DGEVVSEATQQQHEVL	16	0	1767.83	E1BZ05;P02542	E1BZ05	449	464	yes	2;3	2.15e-57	219.43	46997000000	124870	93448	117780	107480	119190	121780	123510	81951	98065
VSAENQAGLSDPK	13	0	1314.64	A0A3Q2TS15	A0A3Q2TS15	5883	5895	yes	2;3	7.83e-39	219.42	44885000000	139850	323840	337170	252070	770160	601690	1035900	766580	831060
KLETDISQLSSEVEDAVQECR	21	1	2435.15	A0A1D5NZY9;P79792;Q8UWA0;P79793	A0A1D5NZY9	1737	1757	no	3;4	1.67e-83	219.35	1187800000	0	0	0	18600	51038	36875	57047	57755	55585
LSCAVESSVLSIR	13	0	1419.74	P79757	P79757	503	515	yes	2	7.89e-39	219.33	866110000	32485	53142	50812	0	0	0	26960	27217	27806
RGDQLFTATEGR	12	1	1349.67	P16419	P16419	572	583	yes	2;3	1.63e-16	219.33	33505000000	315740	501790	581400	164400	392590	412850	217990	190710	199540
SFSPDEINDFK	11	0	1297.58	P02605;F1NZG0	P02605	2	12	yes	1;2;3	6.72e-91	219.03	720420000000	2041000	3430000	3633400	1522500	3761500	2970000	2788300	2104700	2333000
AMYDYTAADADEVSFK	16	0	1795.76	Q9DEH4;A0A3Q2U8G4	Q9DEH4	2350	2365	yes	2;3	2.12e-40	218.85	9723300000	298220	505650	511760	194890	398490	368580	481760	405710	440660
YAMSNSIGPISDGSADISR	19	0	1939.89	A0A1D5PJ08	A0A1D5PJ08	559	577	yes	2;3	1.84e-48	218.68	202260000	0	0	0	5511.6	11682	8545.9	62153	48500	46677
DFTPECQAAWQK	12	0	1479.65	P02112	P02112	122	133	yes	2;3	2.73e-26	218.6	27153000000	700740	743300	814760	292850	397560	495160	749860	662770	695800
NLQEAEEWYK	10	0	1308.6	F1NJ08;A0A1L1RXL9;P09654;Q49MC0	F1NJ08	277	286	yes	2;3	9.87e-18	218.6	12374000000	182760	438120	355940	135350	296810	345810	319310	222880	204600
AYSTVTTNCQK	11	0	1271.58	A0A3Q2TS15	A0A3Q2TS15	349	359	yes	2;3	2.59e-21	218.6	13591000000	88017	132030	124260	90944	214080	157630	302540	219240	229900
VDDNEETIK	9	0	1061.49	P05081	P05081	140	148	yes	2;3	6.1e-16	218.58	166430000000	634800	1253300	1552900	625080	1836600	1622600	1748700	1279300	1366100
LTQESVMDLENDKQQLEEK	19	1	2276.08	A0A1D5NZY9;Q8UWA0	A0A1D5NZY9	1069	1087	no	3;4	4.68e-64	218.57	2695300000	0	0	0	44190	432220	138500	253890	249240	235750
AVTDAISDVK	10	0	1017.53	A0A3Q3A4C6;A0A1D5NY50;Q9DEH4	A0A3Q3A4C6	1680	1689	no	2;3	1.07e-17	218.55	22246000000	425390	534270	566430	114790	248170	190810	532170	411200	429900
AVIVDLEPTVVDEVR	15	0	1652.9	A0A1D5P5Z0	A0A1D5P5Z0	65	79	yes	2;3	1.81e-29	218.54	1770500000	68019	66385	83994	76509	75076	86300	32414	48014	51339
ELEGEVDAEQK	11	0	1245.57	A0A1D5P525;Q9DGM4;A0A1D5P603;A0A1D5NVW6;A0A1D5NYC2;F1P3X1;P02565;Q9DGM5;R4GIG1	A0A1D5NYC2	1824	1834	no	2;3	2.94e-37	218.52	175370000000	500860	1412400	1225000	591150	1439000	1909700	3595100	1033000	950030
ILGYIVEMQSK	11	0	1279.68	A0A3Q2TS15	A0A3Q2TS15	1516	1526	yes	2;3	2.12e-11	218.47	884740000	0	0	0	0	0	0	76916	93093	101060
CQELVSDVDYR	11	0	1382.61	Q9DEG4	Q9DEG4	143	153	yes	2;3	4.13e-21	218.18	49968000000	218170	312790	291220	141180	370520	320880	340710	276820	288450
VRELEGEVDSEQK	13	1	1516.74	A0A1D5PUR6;P13538	P13538	1822	1834	no	2;3;4	5.36e-33	218.16	100820000000	454020	746100	702490	416280	1249400	707330	1202800	948440	874940
NSVDLTWQPPR	11	0	1311.66	Q07784	Q07784	472	482	yes	2;3	4.41e-21	218.11	5242100000	83495	207470	202610	54968	150460	132250	210320	177060	183940
LSGGIDFNQPLIITR	15	0	1642.9	F1NHA9;Q9PU47;A0A3Q2UH56	F1NHA9	17	31	yes	2;3	8.58e-30	218.11	2926500000	93306	207410	199440	30605	43362	60866	56551	75010	66068
LDETDEGQLER	11	0	1303.59	A6BM71;Q98918;Q9IAR9	A6BM71	1171	1181	no	2;3	4.41e-21	218.11	9857500000	36462	59034	46419	37587	79360	69575	32835	23670	25965
SQGGEPTYNVAVGR	14	0	1433.69	Q5ZL50	Q5ZL50	92	105	yes	2	4.5e-24	218.06	1459800000	23981	43154	43201	17869	43549	34407	78902	53926	55678
TATPQQAQEVHEK	13	0	1465.72	P00940	P00940	175	187	yes	2;3;4	2.81e-86	218.06	651120000000	795350	1439900	1651900	828740	2182300	1845700	2149000	1478000	1586700
LSEAVEETEGNELK	14	0	1546.74	A6BM71;Q08476	A6BM71	4226	4239	yes	2;3	5.85e-50	218.06	10511000000	101420	352760	393700	102950	283490	156380	163070	182800	239810
GDSAAEQGAIDKQ	13	1	1288.59	A0A3Q2UCF9	A0A3Q2UCF9	403	415	yes	2;3	1.09e-32	218.06	26635000000	321780	447880	440000	250090	554440	422000	666380	387680	387110
VFLLGEEVAQYDGAYK	16	0	1800.89	A0A1D5P1U2	A0A1D5P1U2	53	68	yes	2;3;4	2.63e-39	218.01	3898500000	64627	65597	74604	0	0	0	0	0	0
LNEDKPADDFSGVLQR	16	1	1802.88	A0A1D5PLW0;A0A1D5P984;Q90577	A0A1D5PLW0	349	364	no	2;3	1.69e-69	217.88	25722000000	247660	566710	594460	175490	444880	468470	540760	549830	562870
MEGDLNEMEIQLNHANR	17	0	2012.9	A0A1D5P603;A0A1D5NVW6;Q9DGM5	A0A1D5P603	1622	1638	no	2;3;4	5.34e-91	217.88	61270000000	306290	376540	395470	346250	559240	546760	695930	480380	453160
AITGASLAEIMAK	13	0	1274.69	A0A1L1RLL0	A0A1L1RLL0	80	92	yes	2;3	1.17e-22	217.83	406570000	103560	156160	186780	0	0	0	84691	68681	67095
AFADLMNEVCR	11	0	1324.59	F1N9Z6;A0A1D5PSF9;Q90724	F1N9Z6	1353	1363	yes	2;3	6.04e-21	217.66	4351800000	134340	186340	197160	73472	119530	124350	185890	175060	194800
GYSFTTTAER	10	0	1131.52	P60706;P53478;A0A1L1RPY3;Q0QWA1;Q5ZMQ2;A0A1D5P5D1;Q5ZLX9;G4WW42	P60706	197	206	no	2	2.33e-17	217.64	10631000000	168520	152100	173560	95422	159080	121940	217770	131820	138850
DLKPENILLDDDMNIK	16	1	1884.95	Q5ZJ45	Q5ZJ45	149	164	no	3;4	6.29e-90	217.4	5141600000	266610	634730	647780	86691	160350	206750	221220	252040	238180
DCGFKDEGEYTVTAGQDK	18	1	2018.85	A6BM71;A6BLM5	A6BM71	7031	7048	yes	2;3;4	4.77e-63	217.26	15639000000	287380	841820	816880	275730	1036800	811470	865900	619570	617830
FLDETADLSPEER	13	0	1520.7	A1IMF0	A1IMF0	117	129	yes	2	2.2e-32	217.14	1031900000	37989	51537	76781	31268	83969	64675	17548	19657	18296
TLSWLDDSQNEK	12	0	1434.66	A0A3Q2UB77;A0A1L1S103	A0A3Q2UB77	965	976	yes	2;3	1.88e-65	217.14	1101700000	189560	450410	456380	120700	173300	172460	157420	127680	133440
YMLTIENSSGSK	12	0	1328.63	A0A3Q2TS15	A0A3Q2TS15	1365	1376	yes	2;3	3.8e-16	217.14	5997000000	51386	106340	97774	73050	153690	133760	185460	140610	152000
SAVYAQGSAAYAR	13	0	1313.64	F1N9Z6;A0A1D5PSF9	F1N9Z6	38	50	yes	2	1.36e-22	216.91	2080700000	46889	137920	166790	20859	58797	79910	62702	70466	65337
NQVAMNPTNTIFDAK	15	0	1662.8	Q7SX63;B3VHV2;B6EAX2;P08106;A0A346RQZ3;A0A4P8GB30;A0A4P8G8N8;A0A2I4KE16;Q7ZSX8	Q7SX63	58	72	yes	2;3	3.95e-31	216.84	5728800000	20407	80114	75530	33754	138150	125150	415570	357510	339740
MPQVPTDLLLETGK	14	0	1540.82	A0A1D5NW68;P19121	A0A1D5NW68	393	406	no	2;3	4.65e-24	216.83	7538900000	91182	135450	201350	55717	102730	96801	152170	114910	173690
TAFDDAIAELDTLNEDSYK	19	0	2129.96	Q5F3W6;F1NMY1;A0A3Q2U4C6	Q5F3W6	199	217	yes	2;3	1.1e-63	216.46	10953000000	115250	308930	309280	119780	345960	429660	475510	493820	473370
ELQAAGLSGDALEK	14	0	1400.71	F1NIJ6;Q5ZMU3;A0A1L1RQ91;A0A1L1RPE8;A0A1D5PRS4	F1NIJ6	419	432	yes	2;3	2.3e-73	216.46	137980000000	660510	1098600	1305400	384160	909760	787300	782270	633070	695260
VDQHTGLVEMIMDK	14	0	1614.77	F1N9Z6;A0A1D5PSF9;Q90724	F1N9Z6	1200	1213	yes	2;3	6.43e-24	216.46	1837000000	54165	133830	143940	92486	133970	231440	0	0	0
LDQAGGVDFQAANAK	15	0	1503.73	A6BM71;A6BLM5	A6BM71	6407	6421	yes	2;3	6.08e-41	216.46	7888300000	109940	235700	235230	45801	137380	103380	305440	248190	238570
ITEAEEAPVFK	11	0	1232.63	A0A1D5P1V6;R4GHJ7;Q5ZME3;A0A1D5PA64;A0A1D5PND5	A0A1D5P1V6	677	687	yes	2;3	1.79e-11	216.45	9903100000	418180	589840	605660	246900	572680	431380	758950	479650	542620
IIGAVDQIQLTQTQLEER	18	0	2054.1	Q90885;Q90838	Q90885	44	61	no	2;3	8.38e-79	216.37	2868800000	95021	144630	147210	93140	110940	135880	83915	81487	78591
ALQNSIQEQVVEMK	14	0	1615.82	P14448;F1P4V1	P14448	154	167	yes	2	1.09e-23	216.34	160880000	32562	48254	41281	0	0	0	45722	33934	31315
DADALIAGAPGAPMDVK	17	0	1610.8	F1NNW0;Q02173;A0A1D5PKV3	F1NNW0	362	378	yes	2;3;4	2.88e-51	216.34	58211000000	184300	416930	445790	133920	357000	281610	913580	696420	722680
ATNQSSLVLIGDVFK	15	0	1590.86	F1N9Z6;A0A1D5PSF9;Q90724	F1N9Z6	1231	1245	yes	2;3	4.42e-31	216.15	2049700000	92505	204500	173430	74956	95808	150620	101020	147690	130970
TTGIVLDSGDGVTHNVPIYEGYALPHAIMR	30	0	3195.6	P08023;F1P476;P63270;A0A3Q3AWV3;A0A1D5NV17;P68034;A0A1L1RU07;P68139;A0A1L1RPH2;A0A1D5PK53	P68139	150	179	no	3;4;5	2.38e-146	216.14	50244000000	122170	252310	173350	118720	175350	162140	192150	315280	272210
DDFSSGTSSR	10	0	1057.43	F1NCA2	F1NCA2	101	110	yes	2	4.45e-17	216.12	7141700000	108830	169960	163300	47943	113900	82533	171410	104880	124670
AVSEMAAASDEAAR	14	0	1377.62	A0A1D5NW93	A0A1D5NW93	130	143	yes	2;3	2.3e-33	216.06	5580400000	99526	102380	114150	66859	128570	104200	96278	63664	90209
EMEANLDNIDFK	12	0	1437.64	Q683M9;Q5U7A2;P21265;E1BR00;Q5U7A3	Q683M9	65	76	yes	2;3	4.59e-20	216.03	6415000000	513070	571350	647630	365150	572620	527540	603400	471530	510250
GDDGIFDDSFIEER	14	0	1613.68	Q5ZIA3	Q5ZIA3	105	118	yes	2	6.19e-22	216.03	1433200000	37389	34638	36454	66907	77999	83742	35572	36314	36312
QGFTQQIEELKR	12	1	1475.77	A0A1D5NYC2;P13538	P13538	1309	1320	no	2;3	6.39e-20	216.03	50993000000	284410	574490	639960	148980	289230	340660	523250	709590	603230
LITPVAAGSTVPSNK	15	0	1453.81	P00337	P00337	8	22	yes	2	4.03e-29	216.03	274440000	12233	16014	24339	7889.2	21891	15560	19249	10973	12744
RQAEEAEELSNVNLSK	16	1	1815.9	A0A1D5P525;Q9DGM4;A0A1D5P603;A0A1D5PUR6;A0A1D5NYC2;P02565;P13538;R4GIG1	P13538	1883	1898	no	2;3;4;5	1.2e-104	215.93	52307000000	325420	520250	633470	300100	579130	450830	650180	603720	603470
GAFTGEISPAMIK	13	0	1320.67	P00940	P00940	72	84	yes	2;3	4.04e-39	215.89	171920000000	721760	1078400	1140000	532390	1001800	911040	1017800	903910	869050
EQYEEEQEAK	10	0	1281.54	A0A1D5P525;Q9DGM4;A0A1D5NWE9;A0A1D5P603;A0A1D5PUR6;A0A1D5NVW6;A0A1D5NYC2;P02565;P13538;Q9DGM5;R4GIG1;F1NM49;Q9IBD4;P29616	P13538	1348	1357	no	1;2;3	8.65e-18	215.87	552070000000	1811500	3968700	4164900	1443400	4784100	3519500	4342000	3058100	3368500
AYDLQSDNIYK	11	0	1328.62	A0A3Q3A4C6;A0A1D5NY50;Q9DEG5;Q9DEH4;Q9DEG4	A0A3Q3A4C6	698	708	no	2;3	1.26e-20	215.87	8128700000	292480	440870	450340	221520	403560	438630	498980	398370	443940
DPLNETVIGLYQK	13	0	1488.78	A0A1D5P525;Q9DGM4;A0A1D5PUR6;A0A1D5NVW6;A0A1D5NYC2;F1P3X1;P13538;Q9DGM5	P13538	602	614	no	2;3	8.79e-23	215.85	21006000000	263180	455740	523000	54158	88757	150180	412320	544170	543210
ALTVPELTQQVFDAK	15	0	1658.89	P09244;A0A1D5P2C3	P09244	283	297	yes	2;3	7.49e-30	215.85	1921800000	37424	69830	67647	0	0	0	70437	64827	57076
NQLQVITNDPGR	12	0	1353.7	A0A3Q2UD12;P15989;F1P2F0;A0A1D5PGD5;A0A3Q3AR07;A0A3Q2UMJ2;A0A3Q2U4U7	A0A3Q2UD12	1380	1391	yes	2;3	1.35e-25	215.83	2701000000	58048	97460	116400	51406	123930	115480	145600	112760	111030
LSEAEDSDESLLGHLMIVGK	20	0	2142.05	Q9I882	Q9I882	63	82	yes	3;4	2.16e-76	215.8	1339400000	119690	161090	203460	56671	43378	94876	68497	127180	146050
GIVYDTGGLSIK	12	0	1221.66	F1NSZ4	F1NSZ4	261	272	yes	2;3	1.45e-25	215.56	1029600000	124150	207330	210690	77025	152750	149470	108540	99114	100040
NICYVITHGEDKEGE	15	1	1762.78	P02609	P02609	154	168	yes	2;3;4	2.98e-40	215.53	756560000000	2598000	5151700	5453400	1728000	3563700	4475500	4585200	5344000	4928700
TAVDQLSSGFFSPR	14	0	1510.74	A0A3Q3AC33	A0A3Q3AC33	62	75	yes	1;2;3	1.88e-73	215.51	75480000000	302420	557540	602260	236130	437540	465060	788150	840610	787320
TEASIFVEDPPQVDEILLK	19	0	2142.11	A0A1D5PUM7;E1C7I7	A0A1D5PUM7	1647	1665	no	2;3	2.22e-47	215.51	2413900000	57214	115730	116020	16236	32366	32001	182080	348080	289110
SQIEEVEDASEPTK	14	0	1560.72	A0A1D5PLW0	A0A1D5PLW0	324	337	yes	2;3	2.68e-33	215.51	2846200000	68656	120880	93213	28432	51921	64987	60331	55212	64616
AAYLMGLNSADMLK	14	0	1496.74	F1P3X1	F1P3X1	387	400	no	2;3	5.74e-22	215.5	513320000	0	0	0	10338	51943	106640	33272	32273	28554
IFPGCEVTVGQDK	13	0	1448.7	A0A1D5P5M6;E1BQD1	A0A1D5P5M6	167	179	yes	2;3	1.62e-22	215.5	5765800000	170060	293710	349670	126800	275100	315190	268670	204250	208910
ANLLQAEIEELR	12	0	1397.75	A0A1D5P525;Q9DGM4;A0A1D5PUR6;A0A1D5NVW6;F1P3X1;P02565;Q9DGM5;R4GIG1	A0A1D5PUR6	1682	1693	no	2;3	6.82e-26	215.46	207580000000	305720	1366900	447490	497920	557070	3547400	333400	292540	290600
GLPDNIASVLNK	12	0	1239.68	A0A1D5P0A1;A0A1L1RP39;Q5ZKW4;Q8JH65	A0A1D5P0A1	96	107	yes	2;3	1.49e-25	215.46	3094000000	117370	157870	177460	111950	189080	235280	77783	63520	62800
AAVEQLTEEQKNEFK	15	1	1762.87	P09860;A0A3Q2UF85	P09860	7	21	yes	2;3;4	2.53e-48	215.23	52726000000	676080	1092400	978240	418120	1190600	1167800	966810	481120	532040
ALEDQLSEIK	10	0	1144.6	A0A1D5P603;A0A1D5PUR6	A0A1D5PUR6	1255	1264	no	2;3	6.28e-18	215.06	251490000000	720460	2675500	1538300	684060	1811000	2066400	3441000	897650	785450
ASNPASDSTR	10	0	1004.45	A0A1D5PHE7;G1K2Z4;Q5ZKX6;A0A1L1S0G1	A0A1D5PHE7	19	28	yes	2	5.93e-17	215.06	669780000	16645	15769	18116	19479	38242	26033	34966	23997	24456
TESGETLTVK	10	0	1063.54	A0A1D5P603;Q90910	A0A1D5P603	64	73	no	2;3	3.82e-25	214.93	169020000000	543820	1589900	1512600	506100	2083600	468660	3832100	857990	678210
TEGGETLTVK	10	0	1033.53	A0A1D5P525;Q9DGM4;A0A1D5PUR6;Q90914;A0A1D5NVW6;Q90913;A0A1D5NYC2;Q90909;F1P3X1;Q90908;P02565;P13538;Q9DGM5;R4GIG1	P13538	65	74	no	1;2;3	2.52e-25	214.83	830820000000	3581000	7293900	7355700	3680500	10817000	8529000	11135000	9151200	9666500
WNTDNTLGTEITLEDQLAR	19	0	2189.06	E1BYN7;A0A1D5NTT4	E1BYN7	75	93	yes	2	4.17e-51	214.82	685950000	28870	36251	35219	29646	38413	39286	26971	30640	28857
NVLGHMQQGGAPTPFDR	17	0	1823.87	A0A1D5PUQ7;Q90YA3	Q90YA3	645	661	no	2;3	4.52e-51	214.65	13444000000	96136	164870	180920	62125	113270	119960	109610	112080	104910
FTASVGIQVVGDDLTVTNPK	20	0	2060.08	A0A1D5PSH6;A0A1L1RQQ0;A0A1L1RKH8;A0A1L1RNS0;P51913;F1NZ78	A0A1L1RQQ0	307	326	no	2;3	3.42e-65	214.65	336590000	15052	31830	31968	12384	27137	35087	46811	53168	47634
LEEAGGATAAQIDMNKK	17	1	1745.86	A0A1D5P525;Q9DGM4;A0A1D5P603;A0A1D5PUR6;A0A1D5NVW6;P02565;R4GIG1	A0A1D5PUR6	1154	1170	no	2;3;4	4.04e-51	214.65	9618200000	96479	434840	133780	81272	297320	346680	772420	194660	172490
AEDTGTYYCAK	11	0	1277.52	A0A3Q2U5M8;A0A3Q2U291;A0A3Q2UPH3;A0A3Q2UDA5;A2N889;A2N884;A0A3Q2UCH6;A2N883;A2N886;A2N885;A2N882;A2N881;A0A3Q2TX22;A0A3Q2U637;A0A3Q2U4V6	A2N883	107	117	no	2	1.79e-11	214.58	2678400000	292340	255350	262510	109420	132270	162860	171010	84785	89421
IYVDDGLISLLVK	13	0	1446.83	A0A1D5P9V0;P00548;F1NW43	A0A1D5P9V0	193	205	no	2;3	4.93e-32	214.44	272120000	0	0	0	0	0	0	63652	137040	115800
NMMQLQSDNMYK	12	0	1501.64	A0A3Q2U3M8	A0A3Q2U3M8	68	79	yes	2;3	4.69e-16	214.26	5037000000	38380	121150	117330	30507	109580	87715	150750	129650	122530
PIYDGGSEIQGYIVEK	16	0	1766.87	A0A3Q2TS15	A0A3Q2TS15	2297	2312	yes	2;3	1.7e-50	214.23	2789900000	100670	262070	268010	111030	172450	282420	223590	380890	303600
DALISQLSR	9	0	1001.55	A0A1D5P525;Q9DGM4;A0A1D5P603;A0A1D5PUR6;A0A1D5NVW6;A0A1D5NYC2;P02565;P13538;Q9DGM5;R4GIG1	P13538	1298	1306	no	2;3	4.79e-30	214.05	261540000000	1992600	3185700	3388000	1052300	2240600	1978400	3393200	2760100	2857100
IFGVTTLDIVR	11	0	1232.71	E1BVT3	E1BVT3	165	175	yes	2;3	1.93e-20	214.05	5247700000	0	0	0	0	0	0	38839	39159	42428
DVNQQEFVR	9	0	1133.55	A0A1D5PDV6	A0A1D5PDV6	8	16	yes	2	4.24e-06	213.98	4672200000	114180	142750	153030	41716	89692	64855	257540	156600	164790
MVSDIAGAWQR	11	0	1232.6	R9PXQ0;P20111;A0A1L1S0L2;A0A1D5PNV5	R9PXQ0	370	380	yes	2;3	2e-20	213.85	17939000000	186520	236830	261510	112210	134520	156120	373860	331980	346860
AQEAVTNTGYK	11	0	1180.57	A0A3Q2U3M8	A0A3Q2U3M8	38	48	yes	2;3	2.02e-20	213.81	7402700000	443250	629060	662500	75584	123620	174710	415970	325480	289050
IDAQEQEAAK	10	0	1101.53	E1C658	E1C658	90	99	yes	2;3	7.69e-17	213.8	5241500000	222290	259290	315000	144860	299290	228460	352430	216210	256350
ELISNASDALDK	12	0	1274.64	P08110;A0A1D5PPN9;B5AAV6;Q90WA6;A0A1D5PHC5;F1NC33;Q04619	P08110	102	113	no	2;3	3.66e-16	213.63	4787800000	248250	274070	359550	250910	361510	340390	315560	263320	268030
QAATSLQQASLK	12	0	1244.67	F1NZ86;Q5ZM98	F1NZ86	637	648	yes	2;3	3.66e-16	213.63	913950000	104910	158560	152280	45748	115470	101660	143420	100160	100210
CWSSTAASAPEMCPIR	16	0	1822.78	F1NII7;Q9DDR6	F1NII7	368	383	yes	2	8.87e-39	213.63	72528000	0	0	0	0	0	0	62705	54386	43652
EAFTVIDQNR	10	0	1191.59	P02609	P02609	31	40	yes	1;2;3	8.77e-45	213.53	927140000000	4975300	6709000	7159500	3798700	7072500	6010700	6951500	5589500	5993600
EAAENSLVAYK	11	0	1193.59	Q5ZMT0;F1P2P9	Q5ZMT0	143	153	yes	2;3	1.48e-11	213.34	9186600000	404810	531610	570870	345630	679950	664190	860660	662140	693400
LQQFFNHHMFVLEQEEYK	18	0	2366.12	A0A1D5P525;Q9DGM4;A0A1D5P603;A0A1D5PUR6;A0A1D5NVW6;A0A1D5NYC2;A0A1D5P600;A0A1D5PFB7;A0A1D5NXZ4;F1P3X1;P02565;P13538;Q910C5;Q9DGM5;R4GIG1;A0A1D5NZY9;F1NM49;Q9IBD4;Q8UWA0	P13538	488	505	no	3;4;5	1.17e-62	213.34	16529000000	0	0	0	92357	116640	127330	0	0	0
GLEDTSTYVGER	12	0	1325.61	A0A1D5PCL3;A0A3Q3AWG5;A0A3Q3A8C1;A0A1D5PBR5;E1C5Z5;A0A3Q2UBY4;A0A1D5PE78;A0A1D5PHW7	A0A3Q2UBY4	344	355	no	2;3	2.31e-25	213.34	8378200000	81813	264220	118400	89766	166250	324060	66896	47381	52252
ATLPEADGER	10	0	1057.5	R9PXQ0;P20111;A0A1L1S0L2;A0A1D5PNV5	R9PXQ0	566	575	yes	2	8.47e-17	213.24	235660000000	711640	698270	739450	376200	721570	534270	1236300	885520	990790
VEFTPDQIEEFK	12	0	1480.71	F1P5V6;P02606	F1P5V6	43	54	yes	2;3	3.26e-16	213.16	2285000000	0	0	0	67277	458380	115400	169290	143970	148480
AIFECEISEPDVQVQWMK	18	0	2208.02	A6BM71;Q98918	A6BM71	2802	2819	yes	2;3	4.02e-47	213.16	1526400000	74335	154950	126590	85807	115250	148730	38475	58905	55132
TITLEVEPNDTIENVK	16	0	1813.93	O42388;A0A1L1RTM7	O42388	12	27	yes	2	4.56e-91	213.06	0	0	0	0	0	0	0	0	0	0
IQHELEEAEER	11	0	1381.65	A0A1D5P525;Q9DGM4;A0A1D5P603;A0A1D5PUR6;A0A1D5NVW6;Q90900;A0A1D5NYC2;F1P3X1;P02565;P13538;Q9DGM5;R4GIG1	P13538	1902	1912	no	2;3	1.23e-48	212.89	1027200000000	1642000	1689700	1759200	1590300	1602300	1742900	1747700	1571300	1787800
YNAANVSDAYYK	12	0	1377.62	A0A3Q2UHZ2	A0A3Q2UHZ2	152	163	yes	2;3	8.39e-20	212.89	12143000000	132450	252280	241410	65528	181820	137640	378090	291810	293740
NAAGLFSPPSESTGPVTVKDDVEAPR	26	1	2640.3	A0A3Q2TS15	A0A3Q2TS15	5199	5224	yes	3;4	8.69e-108	212.77	8822000000	49209	149030	135050	45607	176020	131590	365980	309010	265720
IQLVEEELDRAQER	14	1	1726.88	A0A1D5NT47;F1NK75;A0A1L1RPQ6;Q5ZLJ7;A0A1D5P9B0;A0A1D5P2B9;A0A1D5PV56;A0A1L1RJZ6;P04268;F1NM23;A0A1D5P342;A0A1D5NVL7;Q91968;A0A1D5PSX3;A0A1L1RVF2;A0A1D5P9X2;A0A3Q3ACB9;A0A3Q2U8I1;Q91005;A0A1L1RU52;A0A1L1RVU7;H9L3K0;H9L074;P19352;Q05706;Q8AWI4;A0A452J839;Q90739;Q90740	P04268	92	105	no	3	2.14e-33	212.7	1758800000	0	0	0	34703	66255	46258	156940	252530	110790
AVDSLVPIGR	10	0	1025.59	A0A1L1RY35;A0A1D5PN54;A0A175KE65;Q8UVX3;Q9DDH7;Q90ZX5;Q90ZX4;A0A1D5PJG9;A0A1L1RZJ6;A0A182C637;A0A1D5P3S4	A0A1L1RY35	195	204	no	2	7.68e-07	212.58	6672800000	118680	124650	144740	36355	56857	46743	0	0	0
SSLDGYVVEICK	12	0	1368.66	Q05623;E1C597	Q05623	164	175	yes	2;3	2.72e-25	212.28	25283000000	275690	532150	454110	176490	346030	286880	506090	497560	457360
GYEEWLLNEIR	11	0	1420.7	Q90734;A0A1D5NXS9;A0A1D5PIX0;P05094;A0A1D5PF13;A0A1D5P9P3;A0A1D5P522;R9PXQ0;P20111;A0A1L1S0L2;A0A1D5PNV5	R9PXQ0	387	397	no	2;3	2.6e-20	212.21	19771000000	159960	269950	211530	233810	206320	261290	195230	462510	377740
EFDDLPPAEQR	11	0	1315.6	P13585	P13585	657	667	yes	2;3	3.94e-48	212.21	150210000000	1728900	2030600	2151000	1358000	2667000	2001600	3042400	2188200	2529300
LEQGFELQFR	10	0	1265.64	F1NX83;A0A1D5PF87	F1NX83	25	34	yes	2;3	7.16e-08	212.21	3033200000	142620	226770	205650	134750	143820	193020	128760	187400	173620
YFDPAMTEYLK	11	0	1376.63	A0A1D5PN46;Q9I8D3	A0A1D5PN46	220	230	yes	2;3	8.16e-10	212.21	4916600000	160700	286330	316350	120150	190610	237490	354820	362080	363860
EAFLLFDR	8	0	1009.52	P02604;P02605;F1NZG0	P02604	55	62	no	2	7.36e-14	212.2	89216000000	732780	1608700	1212500	1045200	974430	1429200	1092000	2419800	2036000
LGATPEEESAYVAGER	16	0	1677.78	Q5ZK10;A0A452J7Z5;A0A1L1RX58	Q5ZK10	156	171	yes	2;3	2.41e-50	212.1	1975300000	97647	58198	60305	95137	44399	42616	72048	52334	54038
IQTQPGYANTLR	12	0	1360.71	Q5ZLZ0;A0A3S5ZPB7	Q5ZLZ0	163	174	yes	2;3	2.79e-25	212.09	3994100000	22294	30686	34328	50228	102330	80100	86422	75492	72235
EQDTSAHLER	10	0	1184.54	A0A1D5P525;Q9DGM4;A0A3Q2UHY4;A0A1D5P603;A0A1D5PUR6;A0A1D5NVW6;A0A1D5NYC2;A0A1D5P600;Q90WH5;F1P3X1;P02565;P13538;Q910C5;Q9DGM5;R4GIG1;A0A1D5NZY9;F1NM49;Q9IBD4;P29616;P79792;Q8UWA0;P79793	P13538	1775	1784	no	1;2;3	2.13e-26	212.09	673970000000	988700	1003200	1132500	1157900	1483400	1267800	1811400	1271500	1589000
ELAEDGYSGVEVR	13	0	1422.66	F1NPA9;Q5ZJC1;Q6EE58	F1NPA9	28	40	yes	2;3	8.45e-40	212.09	2705800000	66714	41366	46949	62650	92485	80894	89611	56274	65408
AYDLQSDNVYK	11	0	1314.61	Q9DEG4	Q9DEG4	417	427	yes	2;3	2.7e-11	211.86	19410000000	344610	624080	594980	307100	676120	659560	535670	413730	463210
FSLAPVAVELK	11	0	1172.68	F1NU17	F1NU17	76	86	yes	2;3	2.59e-10	211.78	50005000000	246080	548290	752250	40985	88351	114680	399900	472510	445830
YTPSGHAGAAASESLFISNHAY	22	0	2250.03	Q92007	Q92007	21	42	yes	2;3;4	4.65e-91	211.67	8040900000	334480	375040	448600	339510	247580	282530	114230	105780	118080
GLEDQQVVVGDR	12	0	1313.66	P16419	P16419	345	356	yes	2;3	2.96e-25	211.64	197370000000	828000	884370	952670	640230	1028800	775810	852220	609290	725360
NMWAAFPPDVAGNVDYK	17	0	1893.87	P02609	P02609	137	153	yes	2;3;4	6.35e-39	211.38	104830000000	515570	1851000	1726100	389050	1078200	1292200	1619600	1908900	1698000
DQVANSAFVER	11	0	1234.59	P11501;A0A1D5PUL6;A0A1D5P5R0;A0A1L1RND0	P11501	496	506	yes	2	2.91e-20	211.37	11497000000	138900	182610	187320	129480	281430	207800	251050	181360	172900
VTFVDTPGIIENR	13	0	1459.77	A0A1D5PLW0;A0A1D5P984;Q90577	A0A1D5PLW0	503	515	no	2;3	2.03e-20	211.37	14700000000	230320	344260	411590	152330	289780	267390	127590	119000	115580
AYAAVVTNCHK	11	0	1232.6	A0A3Q2TS15	A0A3Q2TS15	2515	2525	yes	2;3	7.41e-10	211.27	8873900000	111990	179920	244150	47421	75750	83113	92517	81578	81279
QPAHDAWAEDVDLR	14	0	1621.75	A0A1D5P9V0;P00548;F1NW43	A0A1D5P9V0	495	508	no	2;3	5.71e-33	211.22	274220000000	1400500	1659500	1958300	1188600	1684600	1805800	1363900	1232700	1264000
EAFSLFDKDGDGTITTK	17	1	1843.88	R4GJW8;P62149;A0A1D5P2H5;A0A3Q3AZM2;F2Z4K8;O93410;P05419	R4GJW8	15	31	yes	2;3;4	3.64e-51	211.16	12928000000	538030	1059700	1293200	25662	36783	47022	665040	840830	797280
HSVDDDKVHTFELTITK	17	1	1983.99	P16419	P16419	105	121	yes	3;5	1.94e-67	211.13	2666700000	37789	74604	58763	313900	540630	666690	65774	145300	135790
VQAMHDYTATDSDELQLK	18	0	2063.95	F1NZ04;Q5ZLU2	F1NZ04	374	391	yes	2;3;4	1.06e-62	211.13	7219900000	127060	166090	188610	180840	339150	312650	249360	196020	191480
NLDTTEPVNFPSETVR	16	0	1817.88	A0A3Q2UB77;A0A1L1S103	A0A3Q2UB77	315	330	yes	2;3	3.2e-39	211.13	4557700000	83791	99346	115170	70539	124140	106760	139100	93088	96232
GINYTQLSIDNCDRNDAGK	19	1	2152.98	A0A3Q2TS15	A0A3Q2TS15	3510	3528	yes	3	5.22e-63	211.09	1191400000	92962	113100	87436	22630	52709	34763	153760	168400	110560
VSVENVEGVWMK	12	0	1375.68	A6BM71;Q98918;Q9YH41	A6BM71	2106	2117	no	2;3	3.22e-25	210.98	3247400000	239820	472580	405600	104720	188120	203460	200180	215260	223050
VYEEWEEDYGEDHDYYFK	18	0	2414.95	A6BM71;A6BLM5;Q08476;A6BM73;A6BLM6;A6BLM8	A6BM71	5002	5019	no	3	1.09e-62	210.9	988460000	37461	102200	62294	102550	84565	255430	16255	31742	31099
IALGDDSPAIAQK	13	0	1297.69	P00504;F1NTM7	P00504	86	98	yes	2;3	5.58e-21	210.87	3648300000	78251	101200	116300	213910	418340	321000	233420	174500	200360
VSQPDFVQPYQR	12	0	1462.72	A0A1D5NW68;P19121	A0A1D5NW68	84	95	no	2;3	3.26e-25	210.87	21468000000	107750	152660	160210	158320	373740	352430	375300	290780	307990
GPTELTESPK	10	0	1057.53	A6BM71;A6BLM5;Q08476;A6BM73;A6BLM8	A6BM71	4838	4847	no	2;3	1.21e-16	210.6	25248000000	340100	553320	540100	348010	765310	582960	1214300	856280	921100
FLCTVSGTPVIDVAWQK	17	0	1919.98	A0A3Q3A948	A0A3Q3A948	45	61	yes	2;3	3.26e-33	210.44	1035300000	46678	163610	142970	19820	40076	47925	102850	143310	129210
TEEGYYEAITAVELK	15	0	1714.83	A6BM71;Q98918;Q9YH41;Q9IAR9	A6BM71	1732	1746	no	2;3	3.49e-29	210.41	3664200000	67055	120240	125700	116180	218120	274220	78761	138280	118210
AGVGDHADVPGSVIVEEK	18	0	1777.88	A0A3Q2TS15	A0A3Q2TS15	2355	2372	yes	2;3;4	3.63e-51	210.41	88014000000	447230	833210	888450	432180	1090800	881950	923560	687290	723640
VTGLTEDHEYEFR	13	0	1594.73	A0A3Q2TS15	A0A3Q2TS15	3316	3328	yes	2;3	3.36e-59	210.41	54137000000	305180	492530	532770	181040	287580	349460	225040	222500	226930
TIDDLEDELYAQK	13	0	1551.73	Q5ZLJ7;A0A1D5P9B0;A0A1D5P2B9;Q90937;H9L3K0;H9L074	H9L3K0	252	264	no	2	1.62e-22	210.38	558980000	0	0	0	0	0	0	65338	60970	64033
VCEGDIVQLEVK	12	0	1387.7	A6BM71;Q98918;Q9YH41	A6BM71	2094	2105	no	2;3	3.17e-16	210.38	13560000000	398730	819310	647510	204860	274330	219520	741680	507400	585330
SPLEVEVSPAAGAQK	15	0	1481.77	Q90WF0;O42095	Q90WF0	550	564	yes	2;3	5.48e-29	210.35	3901000000	78153	131260	140660	147850	311960	271180	443860	333690	343400
QAAHYESTGLGK	12	0	1260.61	F1NNW0;Q02173;A0A1D5PKV3	F1NNW0	41	52	yes	2;3	1.92e-17	210.35	27625000000	155400	219090	257450	75461	151370	134740	226100	150820	194510
QAGPASVALSSVADFEK	17	0	1675.84	Q8JG64	Q8JG64	129	145	yes	2;3	8.71e-51	210.34	828380000	17602	31114	34140	77155	121370	128050	169390	180760	179200
ALDPFTVPSPPTSLEITSVSK	21	0	2185.15	A0A3Q2TS15	A0A3Q2TS15	5412	5432	yes	2;3;4	2.48e-64	210.34	13227000000	147960	298220	256300	94590	229460	139760	207310	155660	133280
HRPDLIDYSK	10	1	1242.64	R9PXQ0;P20111;A0A1L1S0L2;A0A1D5PNV5	R9PXQ0	196	205	yes	2;3;4	4.65e-16	210.27	24379000000	91787	235350	258730	112830	171330	305480	151350	428510	335870
EITALAPSTMK	11	0	1160.61	P08023;F1P476;P63270;A0A3Q3AWV3;A0A1D5NV17;P60706;P53478;P68034;A0A1L1RU07;P68139;A0A1L1RPH2;A0A1D5PK53;Q5ZMQ2;A0A1D5P5D1	P68139	318	328	no	2;3;4	1.53e-10	210.27	904520000000	4672400	7999600	8621100	3652800	8664200	6721500	10439000	8917800	8850000
IEEYAICPDLK	11	0	1349.65	F1NN63;Q2UZR2	F1NN63	154	164	yes	2;3	1.53e-10	210.27	27314000000	446600	860880	957580	157520	430380	414200	415310	400860	434100
VLDRPGPPEGPVQVTGVTAEK	21	1	2145.14	A0A3Q2TS15	A0A3Q2TS15	3151	3171	yes	2;3;4	3.58e-76	210.16	24707000000	272430	556750	593380	271060	645250	594240	377420	308710	308770
QLGCGTALSALPESK	15	0	1530.77	Q98TD1;A0A1L1S0P1	Q98TD1	289	303	yes	2	1.96e-40	210.14	814490000	50441	79224	80776	7147	18345	15836	93097	54551	48989
QSEEAEELSNVNLSK	15	0	1675.79	F1P3X1	F1P3X1	1887	1901	no	2;3;4	2.63e-31	210.14	10025000000	0	0	0	100080	276180	499400	244030	226530	160510
LQTESGEYAR	10	0	1152.54	F1P3X1	F1P3X1	1286	1295	no	2	1.29e-16	210.08	7506700000	12433	45792	23797	83179	260640	364770	132020	81171	88867
LSGTGSAGATVR	12	0	1075.56	F1NN63;Q2UZR2	F1NN63	504	515	yes	2;3	3.57e-25	210.08	45268000000	404890	707560	845050	138250	328990	280980	487640	403770	453770
IGNAEPTNAGK	11	0	1070.54	A6BM71;Q98918;A0A3Q2U434	A6BM71	3523	3533	no	2;3	3.38e-20	210.08	21337000000	291690	529090	520200	186040	530340	460490	1316400	967400	1005900
CSLADDAAYECR	12	0	1429.56	P16419	P16419	312	323	yes	2;3	3.61e-25	209.97	96897000000	556760	1366200	1441900	350450	1120100	784200	1623600	1153300	1261200
EPITVSSEQMCK	12	0	1407.64	P07630	P07630	213	224	yes	2;3	3.61e-25	209.97	5165700000	156670	243210	244120	74099	164350	146200	183450	129060	143250
FDDSVVQSDMK	11	0	1269.55	A0A1D5PYK0;A0A1D5PFJ6;F1NWP3;A0A1L1RPG0;O73885	A0A1D5PYK0	78	88	no	2;3	2.91e-11	209.97	6449500000	88009	213510	201050	76195	217900	174750	292720	250340	266600
VEVEYETMPGWK	12	0	1466.68	F1NVD4	F1NVD4	398	409	yes	2;3	3.64e-25	209.89	3297400000	174630	323160	274210	76034	129620	153900	214110	223480	190030
LEVDYSIGR	9	0	1050.53	Q5ZJA1	Q5ZJA1	152	160	yes	2	1.38e-14	209.87	79080000	60422	67642	72549	0	0	0	0	0	0
VVDALNSIQTK	11	0	1186.66	P07630	P07630	159	169	yes	2;3	3.46e-20	209.85	6003300000	89456	148030	160020	87284	205600	172620	408120	275390	308960
LTDAGEVSLTAK	12	0	1203.63	A6BM71;A6BLM5	A6BM71	6496	6507	yes	2;3	3.66e-25	209.85	21566000000	362930	632540	629150	150610	315740	249610	1001100	821370	812240
NNTVNTMR	8	0	948.445	Q5ZME4;E1BSN7	Q5ZME4	236	243	yes	2	1.37e-44	209.84	243490000000	305740	780330	730210	222660	990630	702670	1004300	701130	674440
VGQAGISGLLYGPGGLPAGDGAR	23	0	2082.09	A0A1D5PUM7;E1C7I7	A0A1D5PUM7	437	459	no	2	1.02e-62	209.73	868290000	10016	16059	18071	11617	22030	25576	21162	28145	24702
GTEDELDKYSESLK	14	1	1612.75	P04268;F1NM23;A0A1D5P342;A0A1D5NVL7;Q91968;A0A1D5PSX3;A0A1L1RVF2;Q90740	P04268	52	65	no	2;3;4	1.35e-27	209.64	704960000000	3503000	9361200	11067000	2778500	8284900	7697500	6052900	5307400	5891500
VEIASTDHATAITVK	15	0	1554.83	A0A3Q2TS15	A0A3Q2TS15	5272	5286	yes	2;3	8.39e-36	209.64	3140700000	249100	216820	295420	128630	171940	146900	229550	145960	230310
LTLSALLDGK	10	0	1029.61	E1BYN7;A0A1D5NTT4	E1BYN7	257	266	yes	2;3	1.35e-16	209.6	5556500000	187090	332410	348510	75447	99529	133930	185170	199640	198020
LLEGNEYIFR	10	0	1252.65	A0A3Q2TS15	A0A3Q2TS15	2137	2146	yes	2	1.07e-06	209.6	19269000000	222960	402910	346830	161340	172510	248570	176100	295840	254820
AMTEQEQQQLIDDHFLFDK	19	0	2335.08	P00565;A0A3Q2U6M6	P00565	178	196	yes	2;3;4	3.5e-63	209.43	10043000000	325830	634200	888570	267910	250430	553680	266850	557810	563140
EPPVEFTKPLEDQTVEEEATAILECEVSR	29	1	3344.6	A6BM71;A6BLM5	A6BM71	6519	6547	yes	3;4	4.47e-126	209.39	9272900000	107680	212720	227430	76823	88605	136760	85349	193340	161180
VEQIAAIAQELNELDYHDAASVNDR	25	0	2783.34	R9PXQ0;P20111;A0A1L1S0L2;A0A1D5PNV5	R9PXQ0	461	485	yes	2;3;4	1.86e-107	209.16	65192000000	95566	155510	148410	114970	134700	209500	140990	210590	209600
IDYDEFLEFMK	11	0	1448.65	P09860	P09860	148	158	yes	2;3	2.95e-11	209.1	3607700000	179690	261410	222680	345320	187580	484950	162290	196160	211570
SVGQSDAGLYTCK	13	0	1384.63	A6BM71;Q08476	A6BM71	4282	4294	yes	2;3	1.05e-31	208.95	9050600000	220470	431110	433640	97051	267390	200640	592320	429200	451400
IEDVTPIPSDSTR	13	0	1428.71	Q5ZHW8	Q5ZHW8	129	141	yes	2	1.06e-31	208.84	3158800000	170850	311040	323180	81289	203340	155680	233210	147010	171860
FGGEPVGSFVQPR	13	0	1375.69	F1NX83;A0A1D5PF87	F1NX83	595	607	yes	2;3	3.06e-20	208.84	5516600000	66058	111120	113320	12819	32657	32244	207580	170330	176150
SAGVAVPGPMGPAGPR	16	0	1419.73	A0A1D5PYU1;P02457	A0A1D5PYU1	161	176	no	2	4.61e-32	208.84	1711800000	10618	12369	19782	24504	40776	55688	208580	121800	126430
NALAHGLQSAR	11	0	1136.61	A0A1D5P603	A0A1D5P603	1331	1341	no	2;3	3.87e-20	208.75	17300000000	61659	162480	158100	24393	63732	28170	189030	58964	34639
QLTCNEPILSNR	12	0	1443.71	A0A1L1S091	A0A1L1S091	128	139	yes	2;3	4.77e-15	208.74	16301000000	254800	352150	384150	115550	222070	209710	289230	208430	226080
IAEKDEEIDQLK	12	1	1429.73	A0A1D5P525;Q9DGM4;A0A1D5P603;A0A1D5PUR6;A0A1D5NVW6;A0A1D5NYC2;F1P3X1;P02565;P13538;Q9DGM5;R4GIG1	P13538	1579	1590	no	2;3;4	1.18e-24	208.72	518370000000	1527000	4778200	5148600	1253600	3896400	3959500	3695500	3014100	3327000
ALGQNPTQAEVMK	13	0	1385.7	F1P5V6;P02606	F1P5V6	81	93	yes	2;3	4.62e-21	208.72	2574900000	0	0	0	29038	208160	45077	63994	52558	55407
AYATVTNNCTK	11	0	1241.57	A0A3Q2TS15	A0A3Q2TS15	4680	4690	yes	2;3	1.35e-09	208.63	6798500000	166940	268320	211120	126350	267660	218030	219010	161910	164400
EIAAPELEPLHLR	13	0	1486.81	A6BM71;Q98918;Q9IAR9	A6BM71	1399	1411	no	2;3	4.74e-22	208.56	38213000000	249220	384250	429870	175880	247220	313290	299010	329020	324850
QILVGDIGDTVEDPYTAFVK	20	0	2179.1	P21566;A0A1D5NYP3;A0A452J7T9	P21566	54	73	yes	2;3	3.66e-54	208.51	6977800000	153730	287950	273670	195790	320010	437320	162710	187770	171870
AYDLQSDAVYK	11	0	1271.6	A0A3Q3A4C6;A0A1D5NY50;Q9DEG5;Q9DEH4;Q9DEG4	A0A3Q3A4C6	214	224	no	2;3	4.02e-20	208.33	34245000000	587750	839660	875820	329470	469070	458300	616110	516970	588470
YGLHSLEISTCDFDDIAQYR	20	0	2402.08	F1N9Z6;A0A1D5PSF9;Q90724	F1N9Z6	334	353	yes	3	6.83e-76	208.2	1513900000	11928	24237	15472	29175	27107	34829	43289	85864	81971
ASSTQMTVSEGQK	13	0	1352.62	P79757;A0A3Q2UNJ2	P79757	643	655	yes	2;3	1.14e-31	208.08	4043200000	261290	335030	366130	77317	169950	111970	575930	393520	449590
SQLTIDLLSYSPK	13	0	1463.79	E1BU93	E1BU93	179	191	yes	2;3	1.27e-21	208.08	1442900000	200130	477130	353830	44463	74971	117470	130200	192970	174620
TAASSSTATAQSK	13	0	1209.58	E1C123	E1C123	188	200	yes	2;3	1.13e-20	207.88	1594200000	106890	207220	220720	31638	88691	74916	232580	185700	187390
FEELNADLFR	10	0	1252.61	Q7SX63;B3VHV2;P08106;A0A346RQZ3;D6PVB7;A0A1D5PYK0;A0A1D5PFJ6;F1NWP3;A0A1L1RPG0	Q7SX63	305	314	no	2	9.89e-09	207.83	8187800000	37397	76185	67496	68863	96838	157490	38267	67009	58909
DKYTTVTETADSER	14	1	1614.74	A0A3Q3A4C6;A0A1D5NY50;Q9DEG5;Q9DEH4	A0A3Q3A4C6	1031	1044	no	2;3	1.19e-29	207.79	22232000000	287050	502400	490280	223540	566960	426820	476470	352670	370400
DVTTAMNER	9	0	1035.47	A0A1D5PUQ7;Q90YA3	Q90YA3	345	353	no	2	4.69e-11	207.68	127750000000	605880	823770	692910	481530	1034600	749490	1696400	1133500	1259200
LQDEIQNMK	9	0	1117.54	F1NJ08;A0A1L1RXL9;P09654;Q49MC0	F1NJ08	359	367	yes	2;3	4.69e-11	207.68	6890600000	154500	237170	231860	246070	475100	504270	329860	225730	219490
DVNKDDQGEYSFVVDGK	17	1	1913.86	A6BM71;Q98918;Q9YH41	A6BM71	2054	2070	no	2;3;4	5.84e-47	207.56	14344000000	328270	633830	694540	305000	801250	819610	383090	320670	342890
YVPPPFNPDMFSFDEK	16	0	1928.87	A0A1D5NW68;P19121	A0A1D5NW68	475	490	no	2;3	6.94e-46	207.34	13901000000	103960	213740	226380	89439	151740	254100	161310	184810	172440
ELSATSAAQK	10	0	1004.51	A6BM71;Q98918	A6BM71	593	602	yes	2;3	2.45e-06	207.29	22367000000	454670	712620	708850	170100	395330	302640	586190	414610	445460
YGVGEPLESVAVK	13	0	1346.71	A0A3Q2TS15	A0A3Q2TS15	5399	5411	yes	2;3	1.78e-27	207.29	33173000000	131770	230920	220670	163420	374460	285270	580970	443640	447740
ATGEHVTEEDIEDLMKDSDKNNDGR	25	2	2817.24	P02588	P02588	125	149	yes	4;5	3.5e-102	206.86	23917000000	160920	332290	525340	114270	156720	247850	73278	234790	173250
VTAPSGATTDCSVSDGGDGTYR	22	0	2172.92	Q90WF0	Q90WF0	1281	1302	yes	2;3	4.67e-161	206.8	7108700000	58908	73541	92742	61045	114030	88728	98967	60828	68702
VYSENVCGTSQEPATSHNTAR	21	0	2307.02	P16419	P16419	997	1017	yes	2;3;4	9.6e-72	206.74	50509000000	198810	163680	193910	144840	167750	127920	170210	101650	150200
ELTYQCEEDR	10	0	1341.55	A0A1D5NYC2;P13538	P13538	1852	1861	no	1;2;3	3.82e-56	206.73	210000000000	1186900	1469100	1416200	900540	1729400	776530	1774900	1108100	1471500
YNIELDTSEK	10	0	1210.57	A0A1D5PUQ7;Q90YA3	Q90YA3	743	752	no	2;3	6.01e-07	206.49	117930000000	951120	1890100	1858800	682460	1945900	1563200	1624000	1228900	1240500
ELVDDSINNVK	11	0	1244.62	F1NJV4;Q5F3N1;A0A1D5PD30	F1NJV4	114	124	yes	2;3	2.59e-10	206.48	11894000000	354700	539800	545510	229640	515320	454890	569420	439970	463140
RFDDSVVQSDMK	12	1	1425.66	A0A1D5PYK0;A0A1D5PFJ6;F1NWP3;A0A1L1RPG0;O73885	A0A1D5PYK0	77	88	no	2;3	4.93e-14	206.36	10065000000	156030	231060	248770	118840	221190	222870	370980	326350	317680
VCENIPIVLCGNK	13	0	1514.76	P42558;A0A1I7Q3Y7	P42558	111	123	yes	2;3	1.15e-20	206.11	1886200000	72897	143360	139540	32713	79625	68067	100360	86583	79748
QVVDSAYEVIK	11	0	1249.66	P00340;E1BTT8	P00340	233	243	yes	1;2;3	2.02e-21	206.11	563000000000	2188900	3829300	3861700	1209400	2941200	2647300	4486400	3847300	3894600
ADLVNNLGTIAK	12	0	1227.68	A0A1D5PHC5;F1NC33;Q04619;P11501;A0A1D5PUL6;A0A1D5P5R0;A0A1L1RND0;Q5ZIC0;Q2XQE5;Q5ZKZ3;Q5ZMA5	P11501	100	111	no	2;3	1.57e-20	206.1	10289000000	88393	145110	137670	64646	151790	107330	281920	239850	222270
AINDCGPGEATELEACTEAVPR	22	0	2359.04	A0A1D5PUM7	A0A1D5PUM7	2033	2054	yes	2;3	4.39e-86	206.01	15852000000	39879	51813	53695	28817	63113	52946	76655	57684	62303
DTIVQGLNEAGSDLEAIAK	19	0	1942.98	Q5ZL42;A0A1D5PTM7;F1NM03	Q5ZL42	32	50	yes	2;3	2.55e-63	205.98	5571500000	170410	320110	313980	102590	267980	232180	223890	183450	172580
LECQISAIPTPR	12	0	1383.72	A0A1D5NT92	A0A1D5NT92	383	394	yes	2;3	1.68e-20	205.97	1060000000	52396	93230	99416	22029	39140	34472	188170	141960	146690
NALTQEFGPVPDTAR	15	0	1614.8	Q8AYI3;Q5ZMW1	Q8AYI3	636	650	yes	2;3	1.34e-35	205.86	4175400000	127930	166310	171980	74245	207460	175690	349000	250300	276170
DLFDPVIQDR	10	0	1216.61	P00565	P00565	87	96	yes	2;3	1.02e-36	205.83	718860000000	1881500	3461000	3800800	2442600	4180000	4736700	5526100	4969000	5273800
GDHELTNTAR	10	0	1112.52	A0A3Q2TS15	A0A3Q2TS15	2016	2025	yes	2;3	4.57e-12	205.83	38266000000	192730	161560	176880	182240	220320	191160	194480	139950	163360
ISTQDDTSQLLIK	13	0	1460.77	A0A1D5PUM7	A0A1D5PUM7	2107	2119	yes	2;3	5.95e-27	205.8	7800700000	180630	282420	332630	90047	205960	183490	421320	384500	389450
TLNDELEIIEGMK	13	0	1503.75	Q5ZL72	Q5ZL72	206	218	yes	2;3	5.44e-21	205.72	1586700000	0	0	0	24970	29651	29364	118340	95113	103070
NLFATGEGVSVSK	13	0	1307.67	F1N9Z6;A0A1D5PSF9;Q90724	F1N9Z6	215	227	yes	2;3	5.44e-21	205.72	5039500000	25477	92083	94284	247500	289080	770260	200820	526130	320870
QAGGPVDVGPEFQK	14	0	1427.7	E1C4V1	E1C4V1	58	71	yes	2;3	4.32e-28	205.72	5218200000	224660	318980	345430	112600	270500	192780	341220	237330	249290
QDAAWYTATAINK	13	0	1451.7	A6BM71;Q98918;Q9IAR9	A6BM71	1351	1363	no	2;3	5.44e-21	205.72	6088600000	136000	245740	267470	51947	142870	127490	314230	251570	236640
TGGTLEDQIIEANPAMEAFGNAK	23	0	2376.13	A0A1D5NZY9;Q8UWA0	A0A1D5NZY9	216	238	no	2;3	2.52e-86	205.68	1849600000	0	0	0	18462	185220	21530	29988	38011	34258
QFEEAEQQANSNLVK	15	0	1733.82	A0A1D5NZY9;Q8UWA0	A0A1D5NZY9	1889	1903	no	2;3	3.24e-29	205.61	4372300000	0	0	0	60180	264160	61435	146260	111230	117580
LEGGSGGDSEVQR	13	0	1289.58	A0A3Q2TZA6;F1NU79;A0A3Q2U839	A0A3Q2TZA6	264	276	yes	2	6.63e-27	205.56	895520000	45932	56710	58109	26962	45579	33715	26811	21867	22934
LCPGAEDLEITK	12	0	1344.66	A0A1L1RXE9;D0VX29;F1P582	A0A1L1RXE9	35	46	yes	2;3	2.05e-20	205.53	3925100000	280700	381120	441220	175450	443990	347330	441380	293260	330550
DISTNYYASQK	11	0	1288.59	P08110;A0A1D5PPN9;B5AAV6;Q90WA6	P08110	671	681	yes	2;3	1.67e-15	205.52	965170000	40242	60953	86464	51766	132090	103300	81337	66267	75409
GVDEGPDGLR	10	0	1013.48	A0A3Q8WI14	A0A3Q8WI14	121	130	yes	2	5.6e-12	205.36	121130000000	665370	567420	554540	593350	802970	619380	1025900	627110	707450
GDYPLEAVR	9	0	1018.51	A0A1D5P9V0;P00548;F1NW43	A0A1D5P9V0	387	395	no	1;2;3	4.61e-30	205.36	517680000000	1711900	2825200	3156300	1602500	3625500	3160600	2593700	1879500	2056000
DGLPAGAGVGAAGLAGAGAVGSPYGK	26	0	2140.09	A0A1D5PUM7;E1C7I7	A0A1D5PUM7	942	967	no	2;3;4	2.4e-71	205.31	14795000000	153360	307590	354280	95674	216370	222980	266970	260070	227840
VYQLAAGGTAVGTGLNTR	18	0	1747.92	Q5ZLD1	Q5ZLD1	266	283	yes	2	1.41e-50	205.26	419890000	9026.7	13880	15466	1390.2	3855	4386	24321	16822	19010
AGESFTMTVPFR	12	0	1341.64	A0A3Q2TS15	A0A3Q2TS15	5636	5647	yes	2;3	2.89e-53	205.18	6012200000	118650	194360	187680	15821	30791	29022	266290	268540	252450
EQYLQSIEDR	10	0	1279.6	Q9YHT2;A0A1D5PIF0	Q9YHT2	178	187	yes	2	6.09e-12	205.13	5142900000	172210	185780	209610	63869	102570	78861	150700	95765	117580
SNAACAALDK	10	0	1019.47	A0A1D5NYC2;P02565;P13538;R4GIG1	P13538	1438	1447	no	2;3	8.29e-07	205.13	372690000000	645750	1286700	1511300	356190	1091300	785070	1622200	1252800	1381600
LTQTEPVTLIR	11	0	1269.73	A6BM71;Q08476	A6BM71	4619	4629	yes	2;3	2.04e-11	205.13	9693700000	145340	205090	208530	99292	194700	187380	215100	175920	192580
INISEGNCPER	11	0	1287.59	A0A1D5P893;A0A1D5PAH2;A0A1D5PD11;E1BVU6;A0A3Q2UJT5	A0A1D5P893	47	57	yes	2	1.94e-15	205.13	2746400000	140240	165040	193760	128510	236980	189770	242840	157090	181150
ATQEAVSDLIYK	12	0	1336.69	A0A3Q3A4C6;A0A1D5NY50;Q9DEH4	A0A3Q3A4C6	1400	1411	no	2;3	2.45e-20	205.07	20877000000	219180	369170	394310	124040	286270	217940	595530	458000	476720
YGQEQWEEGDLYDK	14	0	1758.74	A6BM71;Q98918;Q9IAR9	A6BM71	1412	1425	no	2;3	6e-28	204.86	3886300000	116570	244430	256410	66414	101940	136730	153590	127570	151310
AQVVTPGAEVLPPWR	15	0	1618.88	A6BM71;Q98918;Q9IAR9	A6BM71	331	345	no	2;3	1.1e-28	204.85	3331800000	42635	79935	81257	36540	76523	76294	193900	171380	172670
DDTLYEDDDVKEALK	15	1	1767.81	D0VX30;A0A1D5P7X9;A0A3Q2UJ64	D0VX30	34	48	yes	3	9.52e-36	204.72	7016600000	109570	346370	386610	80267	420400	342800	448560	252000	262410
PHQYPALTPEQK	12	0	1407.71	Q7LZE8	Q7LZE8	1	12	yes	2;3;4	2.79e-19	204.69	281420000000	771530	1821100	2124400	533480	1509900	1277900	2360000	2072100	2014000
PMTILQGLTDQK	12	0	1343.71	A6BM71;Q98918;Q9YH41	A6BM71	2082	2093	no	2;3	2.77e-20	204.69	2173000000	64419	159930	167720	50182	112860	126750	189570	191260	187400
TLDDSANR	8	0	890.409	Q683M9;Q5U7A2;P21265;E1BR00;Q5U7A3	Q683M9	331	338	yes	2	3.95e-09	204.65	4682200000	42405	37218	44207	3870.5	7733.7	6222.1	66015	44314	56949
DSQGNIYAR	9	0	1022.48	A0A1D5PAU7	A0A1D5PAU7	106	114	yes	2	2.83e-06	204.62	2117600000	73830	86302	88580	83619	153990	120230	99068	61130	81256
AAVISAEGDSK	11	0	1046.52	P84173;D5M8S3;A0A452J889	P84173	209	219	yes	2;3	2.37e-15	204.52	382070000	28544	46779	50281	26113	68341	57704	123600	90974	94510
STESLQANVQR	11	0	1231.62	A0A452J848;P41125	A0A452J848	89	99	yes	2	2.37e-15	204.52	1975300000	74940	108830	109900	44803	101610	76980	152620	95518	108570
HHLDDQTAPR	10	0	1188.56	A0A1D5PUM7;E1C7I7	A0A1D5PUM7	1559	1568	no	3	1.9e-12	204.52	3205100000	28372	42032	52327	17813	30337	35652	19394	21589	21021
EAALSTALGEK	11	0	1088.57	P13648;A0A3Q2UCS4	P13648	144	154	yes	2	2.39e-15	204.5	482040000	115730	253370	292100	22467	51768	45321	62690	47161	43567
TKYETDAIQR	10	1	1223.61	A0A1D5P525;Q9DGM4;A0A1D5P603;A0A1D5PUR6;A0A1D5NVW6;A0A1D5NYC2;A0A1D5P600;Q90WH5;A0A1D5PFB7;A0A1D5NXZ4;F1P3X1;P02565;P13538;Q910C5;Q90767;Q9DGM5;R4GIG1;A0A1D5NZY9;F1NM49;Q9IBD4;P29616;Q8UWA0;P79793;Q91411	P13538	1376	1385	no	2;3	2.84e-07	204.5	433560000000	961470	2324200	2252100	558410	1765900	1337300	1936600	1494300	1494100
EATDASHFLWGK	12	0	1360.64	F1NNW0;Q02173;A0A1D5PKV3	F1NNW0	922	933	yes	2;3;4	3.71e-16	204.5	14974000000	187480	328890	361660	243220	374010	486300	145050	252740	216510
VSAENIVGVGK	11	0	1071.59	A0A3Q2TS15	A0A3Q2TS15	4015	4025	yes	2;3	1.04e-09	204.5	16879000000	221020	425760	418960	180970	482520	357210	542500	428100	442580
NSVVEASEAAYK	12	0	1266.61	Q5ZKJ2	Q5ZKJ2	144	155	yes	2;3	3.01e-26	204.49	923130000	49072	100500	100510	64197	178940	144890	95221	68166	56718
SLEDDLSSDTSGHFK	15	0	1636.72	Q6B344;A0A1D5PY67;E1BWX1	Q6B344	482	496	yes	3;4	5.94e-36	204.35	8138900000	418730	462280	432910	322320	429600	452480	219010	139050	171080
LDEFGEQLSK	10	0	1164.57	P13585;Q03669;A0A1L1RKB7	P13585	253	262	no	2;3	7.82e-12	204.34	226020000000	1185800	2209200	2078500	678590	1730000	1295700	2159200	1454600	1651500
DGIIDKDDLR	10	1	1158.59	P02609;A0A3Q3A970	P02609	41	50	yes	2;3	3.64e-33	204.34	1011000000000	5005500	10884000	12003000	3916400	9273000	9961400	10044000	10029000	9973300
DFNMPLTISR	10	0	1192.59	A0A1D5P909	A0A1D5P909	22	31	yes	2;3	7.82e-12	204.34	22051000000	101270	170090	173070	81063	170410	172560	329210	294400	280190
LAPDYDALDVANK	13	0	1403.69	E1BS06	E1BS06	139	151	yes	2;3	1.05e-26	204.17	1819300000	130800	179400	181790	83113	169570	137730	320390	242430	266780
VMLGETNPADSKPGTIR	17	1	1784.91	O57535;A0A1I7Q438	O57535	90	106	yes	2;3	4.85e-45	204.13	5590500000	41612	57375	72617	33251	73005	70759	156770	124240	133470
AIGSASEGAQSSLQEVYHK	19	0	1960.95	Q5ZJX9	Q5ZJX9	169	187	yes	3	1.33e-102	204.07	1729800000	72423	79509	87458	42093	47845	49919	81832	59929	65172
EFTLEFSR	8	0	1027.5	P13585;Q03669;A0A1L1RKB7	P13585	482	489	no	1;2	2.12e-25	204.03	55973000000	451340	653010	623480	182610	232990	318720	598330	845800	797640
NICYVITHGEDK	12	0	1447.68	P02609	P02609	154	165	yes	2;3	7.13e-14	204	49379000000	189670	571980	580060	115310	243890	401140	189640	263630	270480
NSLESYTYNMK	11	0	1348.6	Q7SX63;B3VHV2;B6EAX2;P08106;A0A346RQZ3;D6PVB7;M4MBM4;M4MA50;M4MA71	Q7SX63	543	553	yes	2	3.1e-10	203.83	369460000	27874	77165	66839	0	0	0	142250	116400	105320
KLEDECSELKK	11	2	1377.68	A0A1D5P525;Q9DGM4;A0A1D5P603;A0A1D5PUR6;A0A1D5NVW6;A0A1D5NYC2;A0A1D5P600;A0A1D5PFB7;A0A1D5NXZ4;F1P3X1;P02565;P13538;Q910C5;Q9DGM5;R4GIG1;F1NM49;Q9IBD4;P29616	P13538	945	955	no	2;3;4;5	3.58e-15	203.83	410140000000	1145000	3267600	3435300	721420	1878000	2227900	3003500	3453800	3341600
NLEPEWAAAATEVK	14	0	1527.76	F1NK96;Q5F472	F1NK96	201	214	yes	2;3	9.04e-22	203.82	503860000	36087	72446	79671	27135	45237	40265	95648	86609	84497
NAENAIEALKEYEPEMGK	18	1	2034.96	P13585;Q03669;A0A1L1RKB7	P13585	111	128	no	2;3;4	3.44e-57	203.81	53251000000	267110	1050700	863070	184860	767770	722680	809170	968780	753140
QEATLVVGGDGR	12	0	1200.61	F1NN63;Q2UZR2	F1NN63	53	64	yes	2;3	3.7e-20	203.61	108860000000	783570	1016900	1137800	629960	1316200	1165000	1173500	993520	1027800
QQFEEILR	8	0	1061.55	A0A1D5P9V0;P00548	A0A1D5P9V0	412	419	yes	2	5.28e-09	203.55	409080000000	1143800	1584600	1598200	1699000	3120500	3044600	2762500	2223600	2305500
AISEELDHALNDMTSL	16	0	1757.81	A0A1D5NT47;F1NK75	A0A1D5NT47	256	271	yes	2;3	5.94e-78	203.51	654050000000	2686200	2514500	2927400	945400	1109700	1107000	1692400	1538800	1791500
TLALLFASAGGEAEASGGGGK	21	0	1862.94	A0A1D5PUR6	A0A1D5PUR6	618	638	yes	2;3	2.79e-54	203.37	1833100000	43547	259650	107270	22962	41968	424400	36319	27797	28036
HQGVMVGMGQK	11	0	1170.56	P08023;F1P476;P63270;A0A3Q3AWV3;A0A1D5NV17;A0A3Q3A5C8;P60706;P53478;B5M200;Q90736;P68034;A0A1L1RU07;P68139;A0A1L1RPH2;Q5ZMQ2;A0A1D5P5D1;Q5ZLX9	P68139	42	52	no	1;2;3;4	9.37e-16	203.35	434980000000	1037500	2394200	2549300	661330	1573900	1569100	2845100	2565600	2485500
MGSMTWVPVNSVPVADK	17	0	1816.89	A0A1D5PUM7;E1C7I7	A0A1D5PUM7	1897	1913	no	2;3	8.43e-33	203.29	1387700000	69898	164300	192540	0	0	0	27734	40573	37052
LIFSDGSR	8	0	893.461	F1NN63;Q2UZR2	F1NN63	492	499	yes	2	5.72e-09	203.19	29721000000	147240	230680	258560	33833	50535	68706	321480	300120	311830
IDSVTSADVVNAAK	14	0	1388.71	A0A1L1RXE9;D0VX29;F1P582	A0A1L1RXE9	393	406	yes	2;3	1.07e-21	203.11	1955900000	64954	115390	114310	42946	111660	90479	161710	121970	127690
AAVPSGASTGIYEALELR	18	0	1803.94	A0A1D5PSH6;A0A1L1RQQ0;A0A1L1RKH8;A0A1L1RNS0;P51913;F1NZ78;Q5ZIQ4	A0A1L1RQQ0	33	50	no	2;3	8.75e-57	203.11	11362000000	333730	476750	482860	222080	355250	333660	583690	572230	571190
VLDSGAPIR	9	0	926.519	Q5ZLC5;A0A1L1RY04	Q5ZLC5	130	138	yes	2	9.39e-10	203.07	9022300000	47591	48098	52780	37681	64227	52609	67618	43549	46570
DIGQYTCDCGTDQTSANLNIEDR	23	0	2645.1	A6BM71;A6BLM5	A6BM71	6320	6342	yes	2;3	5.47e-86	203.06	12180000000	58903	69158	73473	46257	79857	72707	68068	49317	54021
NMHDFSDISYR	11	0	1383.59	Q9DEH4;A0A3Q2U8G4	Q9DEH4	2195	2205	yes	2;3	3.41e-15	203.02	3837900000	86036	127450	161370	48489	86738	118650	142760	140830	131720
VINEPTAAALAYGLDK	16	0	1644.87	F1NZ86;Q5ZM98	F1NZ86	221	236	yes	2;3	6.1e-45	202.82	806800000	135870	212590	202400	17446	32319	33498	152500	122100	125650
TMPYYVPVADTPEMQR	16	0	1896.88	A0A3Q3A4C6;A0A1D5NY50;Q9DEH4	A0A3Q3A4C6	2445	2460	no	2;3	9.83e-33	202.61	7942100000	112900	202670	201220	64033	154230	125780	251910	190430	195160
GVHVETIAPGDGR	13	0	1306.66	Q90ZG0	Q90ZG0	2	14	yes	2;3	6.28e-31	202.56	9993600000	57699	66415	73221	66263	73666	75747	100310	77738	87818
VEIIANDQGNR	11	0	1227.62	Q7SX63;B3VHV2;B6EAX2;P08106;A0A346RQZ3;A0A4P8GB30;A0A4P8G8N8;Q7ZSX8;A0A1D5PYK0;A0A1D5PFJ6;F1NWP3;O73885;Q90593	Q7SX63	27	37	no	2;3	3.74e-15	202.56	60572000000	365700	484300	522450	246360	419880	363590	457580	354820	374770
EDQTEYLEER	10	0	1310.56	A0A1D5PHC5;F1NC33;Q04619;P11501;A0A1D5PUL6;A0A1D5P5R0;A0A1L1RND0;Q5ZIC0;Q2XQE5;Q5ZKZ3;Q5ZMA5	P11501	191	200	no	2;3	2.05e-08	202.56	10568000000	39445	51767	52703	37344	79669	58809	50345	34528	31755
VFAPSSGSSAEK	12	0	1165.56	A0A1D5PY21;A0A3Q2UA45	A0A1D5PY21	62	73	yes	2	4.6e-20	202.56	514530000	33477	64202	63115	11523	24715	21658	35175	27418	34237
KALQEAHQQTLDDLQVEEDK	20	1	2337.14	A0A1D5NYC2;P13538	P13538	1000	1019	no	3;4	1.21e-70	202.49	5696100000	76487	151650	182130	51885	98633	109120	149290	210170	194750
AEMALNHGEEQVK	13	0	1454.68	Q5ZHV4	Q5ZHV4	101	113	yes	2;3	1.08e-22	202.44	18945000000	327260	651580	624070	181980	448030	375150	531160	317120	341580
TESESAYSDEPLGQPPR	17	0	1861.83	A0A3Q2UFS4	A0A3Q2UFS4	235	251	yes	2;3	1.9e-45	202.44	1260400000	22005	29775	29244	26973	52984	55236	37927	25886	25993
SPASDTYIVFGEAK	14	0	1483.72	A0A1L1RNL6;A0A1D5PLP1;A0A1D5PMH5	A0A1L1RNL6	1334	1347	yes	2;3	1.25e-21	202.44	1246100000	61629	105850	90467	29802	36767	36342	113030	99138	101820
QGELSVGVTYGGDPIPK	17	0	1715.87	Q90WF0	Q90WF0	927	943	yes	2;3	1.91e-45	202.4	334100000	0	0	0	46869	89690	95730	41238	28174	25554
DPSTGICDLLYDSAPSGR	18	0	1922.87	A0A1D5P061;A0A1D5PVZ4;E1BQZ7	A0A1D5P061	1151	1168	yes	2;3	1e-56	202.4	1168100000	87658	142360	149590	0	0	0	74366	59950	63694
GVMTIPEVVLK	11	0	1184.68	R4GKM8	R4GKM8	325	335	yes	2;3	3.88e-15	202.36	1203400000	71093	103250	83031	89259	149070	151280	200360	116830	106230
FFSASCVPGATIEQK	15	0	1640.79	Q4ADJ7;Q4ADJ6;Q4ADG4;P02789;E1BQC2	Q4ADJ7	174	188	yes	2	3.64e-35	202.29	822510000	20177	41666	42740	13818	43849	35026	62935	48711	47251
LTLYDIAHTPGVAADLSHIETR	22	0	2392.24	E1BVT3	E1BVT3	52	73	yes	3;4	1.97e-85	202.22	9028100000	58526	77245	75323	2287.5	2180.2	3433.8	42977	68213	67753
QYEQNIINYK	10	0	1311.65	R9PXQ0;P20111;A0A1L1S0L2;A0A1D5PNV5	R9PXQ0	683	692	yes	2;3	1.25e-11	202.2	74651000000	392950	788380	799070	334780	876050	757890	795030	607070	588350
ISEQFTAMFR	10	0	1228.59	F1NYB1;P09206;P32882;P09203;G1K338;P09244;A0A1D5P2C3	F1NYB1	381	390	no	2	1.25e-11	202.2	414430000	0	0	0	0	0	0	24037	32950	32207
ESQLMQSEK	9	0	1078.5	A0A3Q3A4C6;A0A1D5NY50;Q9DEH4	A0A3Q3A4C6	2281	2289	no	2;3	1.11e-09	202.2	27286000000	497110	829290	790730	230140	547070	398600	503580	354180	376550
TSIHVMPDTPTILLAK	16	0	1735.95	Q9DEG4	Q9DEG4	260	275	yes	2;3	3.61e-78	202.18	964340000	13802	20837	22124	0	0	0	25665	22493	23272
IGVAAQNCYK	10	0	1122.55	P00940	P00940	59	68	yes	2;3	3.41e-25	202.17	127950000000	605000	1069000	1190700	478200	1222200	980700	937100	679600	671680
DDDIAALVVDNGSGMCK	17	0	1778.78	P60706;A0A1L1RPY3	P60706	2	18	yes	2;3	0	202.16	6307300000	210070	229100	203690	75495	148590	145580	190240	148970	142270
VGINYQPPTVVPGGDLAK	18	0	1823.98	A0A1D5NW27;P02552;A0A1D5P198;A0A1D5NXV1;A0A1D5PA34;A0A1D5PAR5;P09645;F1P5B0;P09642;A0A1D5NXC9;A0A1L1RJP8;F1NW97;F1NWX0	A0A1D5NW27	353	370	no	2;3;4	4.75e-48	202.13	11206000000	84849	167120	178430	58096	154570	120610	123760	93193	81607
AILVDLEPGTMDSVR	15	0	1614.83	P32882;P09203;G1K338;P09244	P09244	63	77	no	2;3	3.8e-35	202.05	3149400000	127270	147600	153110	164160	166980	201010	142370	176270	156780
AAIAQAGYTDK	11	0	1107.56	P07322	P07322	229	239	yes	2;3	1.53e-28	202.05	324880000000	1561600	2497100	2757200	1312900	3045500	2420100	4162600	3411500	3594100
VAPEEHPVLLTEAPLNPK	18	0	1953.06	P60706;P53478;A0A1L1RPY3;A9YXX3;A9YXX2;Q5ZMQ2;Q5ZLX9	P60706	96	113	no	2;3;4;5	1.09e-56	201.95	33706000000	211260	268060	327980	125240	167960	177430	158370	113800	121930
ASTHEQWAYGK	11	0	1276.58	R9PXQ0;P20111;A0A1L1S0L2;A0A1D5PNV5	R9PXQ0	413	423	yes	2;3	4.24e-15	201.84	27815000000	225730	256360	310600	208120	242360	302730	346090	330910	359760
YDDPTVQSDMK	11	0	1297.55	Q7SX63;B3VHV2;B6EAX2;P08106;A0A346RQZ3;D6PVB7;A0A4P8GB30;A0A4P8G8N8;A0A2I4KE16;Q7ZSX8	Q7SX63	79	89	yes	2;3	4.24e-15	201.84	2049800000	107610	277180	254650	51124	193680	180400	110260	71509	84025
TEDQGQYTCK	10	0	1228.5	A6BM71;A6BLM5;Q08476;A6BM73	A6BM71	4777	4786	yes	2;3	1.33e-11	201.84	21744000000	168560	650130	490460	130840	501030	401490	433720	271130	333030
SASGVEFTTSGSSNTDTGK	19	0	1831.81	F6T197;Q9I9D1	Q9I9D1	35	53	no	2;3	7.84e-58	201.75	13406000000	210850	346700	366920	186700	505440	368180	477950	278690	308670
KQETTPINDNVSQCCSSSYANR	22	1	2558.11	A0A1D5NW68	A0A1D5NW68	441	462	yes	3;4	1.41e-85	201.61	23441000000	76992	107690	130040	193940	771840	591860	194430	133880	147780
HITGFDSVDDESK	13	0	1448.64	F1P0N2	F1P0N2	508	520	yes	2;3	1.77e-26	201.6	9323000000	226450	232190	275920	196810	258860	308000	398160	254510	365890
LTFDSSFSPNTGK	13	0	1399.66	E1BYN7;A0A1D5NTT4	E1BYN7	97	109	yes	2;3	1.72e-20	201.6	3836800000	104140	186410	159740	37516	69475	53297	149200	119880	116920
TTTGLSTIDEVISTSPQYQSVPDFQR	26	0	2869.4	F1P0N2	F1P0N2	96	121	yes	2;3;4	1.28e-46	201.57	6783200000	79630	156350	166230	38082	73314	79977	124910	137500	135490
NAQYGQILK	9	0	1033.56	A0A3Q8WI14	A0A3Q8WI14	170	178	yes	1;2;3	4.49e-11	201.49	18175000000	143160	418860	414570	122140	483590	372140	553400	404550	379380
QLCQLNEQLVK	11	0	1371.72	A0A1D5PI23	A0A1D5PI23	168	178	yes	2	4.49e-15	201.48	557440000	48049	92790	99265	13421	32180	29120	88429	76129	67220
SAYDALPSAMIVSMACCATGSTK	23	0	2391.06	F1NX83;A0A1D5PF87	F1NX83	635	657	yes	2;3	2.67e-91	201.3	2688500000	88055	130240	98608	30729	64324	47650	111990	97009	84091
LEQQVDDLESSLEQEK	16	0	1888.89	A0A1D5PFB7;A0A1D5NXZ4;Q910C5;Q90767;A0A1D5NZY9;Q8UWA0	A0A1D5NZY9	1035	1050	no	2;3	2.03e-45	201.3	432670000	0	0	0	5159.7	43274	12157	26081	15863	16142
YGSVEIDELGK	11	0	1208.59	A0A1L1S091	A0A1L1S091	29	39	yes	2;3	4.76e-15	201.1	34699000000	384540	853960	974840	273420	759550	647340	1048100	755620	875640
VTAENPEGFIEHK	13	0	1469.72	A6BM71;Q98918;Q9YH41;Q9IAR9	A6BM71	1640	1652	no	2;3;4	3.17e-21	201.04	57482000000	369550	584920	628430	437510	947720	824390	1139700	832370	884630
GQVCLPVISAENWK	14	0	1599.81	Q5ZKN7;A0A1D5PKG6;A0A1D5PH36	Q5ZKN7	83	96	yes	2;3	1.02e-21	201.02	317730000	35076	57166	94676	28064	43325	65540	0	0	0
ELGTCYQVEPNTK	13	0	1537.71	A0A1D5PCL0;Q90985	A0A1D5PCL0	1421	1433	no	2	2.07e-20	201	508140000	27627	38193	39108	20252	59393	37870	61364	43971	42396
WVTYFNKPDIDAWELR	16	1	2052.01	E1C043	E1C043	46	61	yes	3;4	3.83e-45	200.94	3111700000	0	0	0	26260	29664	29289	43469	49602	50792
KDIDDLELTLAK	12	1	1372.74	A0A1D5P525;A0A1D5P603;A0A1D5PUR6;A0A1D5NVW6;A0A1D5NYC2;F1P3X1;P02565;P13538;Q9DGM5;R4GIG1	P13538	955	966	no	2;3;4	5.44e-25	200.93	13187000000	331900	694410	742990	89338	208280	268270	221060	248580	248340
QQEVVGFLEANK	12	0	1360.7	E1BVU4	E1BVU4	19	30	yes	2;3	3.43e-14	200.82	3154300000	165330	349750	347420	110050	127010	140940	420690	385750	365040
NADMSEDMQQDAVDCATQAMEK	22	0	2486.97	A0A3Q3AQZ3;F1NRI4	A0A3Q3AQZ3	10	31	yes	2;3;4	2.53e-118	200.74	8792600000	84429	241070	277050	69225	211150	181010	176160	133790	142670
EQYEEEQEAKGELQR	15	1	1864.84	A0A1D5P525;Q9DGM4;A0A1D5P603;A0A1D5PUR6;A0A1D5NVW6;A0A1D5NYC2;P02565;P13538;Q9DGM5;R4GIG1	P13538	1348	1362	no	3;4	2.15e-35	200.69	30932000000	289240	229350	103710	121210	762910	166690	444550	243930	127450
LEEEIEMEVK	10	0	1247.6	A6BM71;Q98918	A6BM71	3171	3180	yes	2;3	3.9e-06	200.6	14315000000	202280	450680	442700	314800	788480	752340	669780	531370	563900
VLVLDKPGPPR	11	1	1189.72	Q07784	Q07784	649	659	yes	2;3	5.84e-09	200.56	6114700000	45018	85204	99807	23902	32081	53302	96280	150060	129920
TGEGKDDTAGELDFSGLLK	19	1	1951.94	P16419	P16419	166	184	yes	2;3;4	1.72e-57	200.35	21331000000	248970	782900	837580	198730	843160	917950	896910	960800	914720
HQIQSYTCEIDALK	14	0	1704.81	E1BZ05;P02542;O73665	E1BZ05	318	331	yes	2;3	1.84e-21	200.21	7639900000	77221	148800	155210	88804	136230	172290	471710	516770	435630
SEIDLLNIR	9	0	1071.59	Q6B344;A0A1D5PY67;E1BWX1;P51901	Q6B344	629	637	yes	2	1.5e-09	200.16	5517100000	299680	403400	373820	77807	102190	109350	246410	251460	223660
GALEQTER	8	0	902.446	A0A1D5NYC2;P13538	P13538	1693	1700	no	2	1.05e-17	200.16	996330000000	2049900	1654600	1862600	2963400	4011200	2421600	4603600	3906900	4387500
LLSQQCSYMGGCYLEK	16	0	1935.85	A0A1D5PLW0;A0A1D5P984;Q90577	A0A1D5PLW0	732	747	no	2;3	1.93e-38	200.16	467090000	88164	277530	218790	0	0	0	33559	30201	24838
AGLLGLLEEMRDDK	14	1	1558.8	A0A1D5NYC2;P13538	P13538	770	783	no	2;3	7.02e-28	200.13	15445000000	97768	286140	83738	81686	108630	94907	70612	238480	163880
VSYCPTEPGSYR	12	0	1414.62	Q90WF0	Q90WF0	2039	2050	yes	2;3	6.72e-20	200.09	4852300000	67609	94391	96834	62025	117980	104900	194490	122800	126730
GEAEATENLLVSSEEVLR	18	0	1944.96	R4GJM5	R4GJM5	78	95	yes	2;3	3.06e-51	200	4346200000	90645	119880	125730	63615	101460	92480	75688	71552	78794
TSAVPTLSTFR	11	0	1178.63	E1BZ05;P02542;O73665	E1BZ05	50	60	yes	2;3	5.62e-15	199.86	4881900000	56690	107550	115400	44134	114360	112370	92932	70428	62179
ISVYYNEATGGK	12	0	1300.63	P09244	P09244	47	58	yes	2	6.38e-33	199.82	0	0	0	0	0	0	0	0	0	0
EEASDYLELDTVK	13	0	1510.7	P08110;A0A1D5PPN9;B5AAV6	P08110	252	264	yes	2;3	2.46e-20	199.82	6746000000	99201	162060	202680	132350	240490	251510	136260	126920	129250
LYTLVLTDPDAPSR	14	0	1559.82	A0A1L1S091	A0A1L1S091	61	74	yes	2;3	1.59e-27	199.82	2368000000	155710	236470	253820	60444	82788	95191	61156	65160	68110
GQIQEIVLVGGSTR	14	0	1455.8	Q7SX63;B3VHV2;B6EAX2;P08106;A0A346RQZ3	Q7SX63	332	345	yes	2;3	8.69e-22	199.8	868000000	0	0	0	55202	99689	116850	50165	94510	73508
TEGNFEQANEELR	13	0	1535.69	A0A3Q2UCJ9;A0A1D5PTJ2;A0A1D5PV02	A0A3Q2UCJ9	1531	1543	yes	2	2.28e-26	199.8	1452600000	28904	62231	52730	44661	123440	94465	23998	16092	17556
NNVPIDVQAHPGK	13	0	1387.72	F1N9Z6;A0A1D5PSF9;Q90724	F1N9Z6	315	327	yes	2;3;4	4.03e-20	199.68	14579000000	65564	180460	177770	23510	114640	88131	214620	180690	193280
GTDPEETILNAFK	13	0	1433.7	A4UNW1;A0A1D5PFA5;P02611	A4UNW1	91	103	yes	2;3	2.31e-26	199.68	918270000	0	0	0	37268	159070	46403	63655	69666	67861
VSTPQDVMLEELSLSTNR	18	0	2018	A0A3Q2TYR0	A0A3Q2TYR0	20	37	yes	2;3	7.04e-51	199.68	3788100000	33848	56677	64685	131390	251130	278480	25199	29260	28206
RKEEEELVALK	11	2	1342.75	A0A1L1RXW8;P12620;A0A3S5ZPU4;Q7ZZH5;O57559	A0A1L1RXW8	47	57	no	2;3	1.65e-47	199.68	0	0	0	0	0	0	0	0	0	0
IVEDEEGNEK	10	0	1160.52	Q5F3G9;A0A1D5PUL8	Q5F3G9	450	459	yes	2;3	1.8e-11	199.67	819770000	42712	61703	71261	23994	73594	56938	107260	70615	81413
AEDTATYFCAK	11	0	1275.54	A0A3Q2TYH6	A0A3Q2TYH6	88	98	yes	2	5.75e-15	199.67	130130000	13228	18752	19059	0	0	0	53910	32725	34765
RPDMATDEALELAR	14	1	1586.77	P34065	P34065	199	212	yes	2;3	5.48e-28	199.58	1320400000	175790	130160	145490	16095	19995	20083	68976	55313	59542
DISEASVFDSYVLPK	15	0	1668.82	Q5ZM66	Q5ZM66	52	66	yes	2;3	1e-28	199.43	736040000	215330	304970	339290	97771	129210	123360	91529	90391	91121
AEDTASDSVEAAK	13	0	1292.57	Q5ZI86;F1P1B7;A0A3Q2U853	Q5ZI86	9	21	yes	2;3	2.38e-26	199.43	1663300000	49511	58327	63439	82996	129700	104400	113100	75942	87607
DIYDQYGEEGLK	12	0	1428.64	F1NKV0	F1NKV0	62	73	yes	2;3	3.42e-14	199.43	1172800000	52175	102010	97576	66335	154470	160250	123020	94209	101380
IESLQEEIAFLK	12	0	1418.77	E1BZ05;P02542;O73665	E1BZ05	221	232	yes	2;3	7.28e-20	199.43	4317500000	71005	151730	126560	42997	62636	125800	113370	266460	178570
EVGVYEAIKDDSWLK	15	1	1750.88	Q5ZME2;A0A452J7S4;A0A1D5PE17	Q5ZME2	206	220	yes	3	2.78e-48	199.41	2366700000	187580	339930	357920	86399	126130	222940	103430	146060	161600
VANIVDSVQASQK	13	0	1357.72	R4GKM8	R4GKM8	41	53	yes	2;3	4.02e-20	199.4	2083700000	78067	124480	117580	54137	111890	115420	14420	11499	11138
GAGSGALGLTVEGPR	15	0	1340.7	Q90WF0	Q90WF0	1078	1092	yes	2;3	4.93e-28	199.4	2527900000	144400	177580	185940	67612	118680	102990	136470	99407	102020
FAQPGSFEYEYAMR	14	0	1694.74	Q5ZIZ5	Q5ZIZ5	257	270	yes	2;3	1.67e-27	199.4	439400000	36755	31256	24750	0	0	0	0	0	0
VNVAECGAEALAR	13	0	1358.66	P02112;Q90864	P02112	19	31	yes	2;3	5.93e-27	199.4	131510000000	664600	840810	915020	546970	947720	829450	1093100	700050	763900
TIAMDGTEGLVR	12	0	1261.63	Q5ZLC5;A0A1L1RY04	Q5ZLC5	115	126	yes	2;3	7.37e-20	199.33	18316000000	249510	392270	465020	138780	361920	319640	564190	469460	516570
VTQSNFAVGYK	11	0	1212.61	E1BYN7;A0A1D5NTT4	E1BYN7	164	174	yes	2;3	5.99e-15	199.33	3685600000	67867	103620	110620	99799	179510	136180	84371	56810	56043
VDQLAAQLADLAAR	14	0	1453.79	P12003;F1NYY0	P12003	548	561	yes	2;3	2.2e-21	199.31	1081000000	66000	116910	126890	42367	77401	90465	114700	103510	100570
GLPGESGAVGPAGPIGSR	18	0	1577.82	P02467	P02467	591	608	yes	2;3	2.44e-37	199.31	736610000	38310	71881	126970	13147	33095	44531	0	0	0
VAPLAEGALPYNLAELQR	18	0	1924.04	A0A1D5PP62;A0A1D5PSJ5;F1P3D8	A0A1D5PP62	292	309	yes	2;3	2.44e-37	199.31	2200400000	127780	260380	253910	30209	62676	66582	99629	97418	92948
GTNDSLMR	8	0	892.407	E1BZ05;P02542;O73665	E1BZ05	332	339	yes	2	1.04e-08	199.29	16473000000	202540	162750	166500	201100	292160	251270	192360	126450	113390
DAGTIAGLNVLR	12	0	1198.67	A0A1D5PYK0;A0A1D5PFJ6;F1NWP3;A0A1L1RPG0;O73885	A0A1D5PYK0	160	171	no	2;3	3.99e-14	199.17	12485000000	177270	318140	342380	104740	190450	196290	289290	287160	268820
ATGYLLPPDTVQIR	14	0	1542.84	A0A3Q3A4C6;A0A1D5NY50;Q9DEG5;Q9DEH4	A0A3Q3A4C6	576	589	no	2;3	1.72e-27	199.12	6312100000	166850	274670	274320	108700	183720	198660	301940	277930	272500
NTENDTIIFIR	11	0	1334.68	A0A1D5PCL3;A0A3Q3AWG5;A0A3Q3A8C1;A0A1D5PBR5;E1C5Z5;A0A3Q2UBY4;A0A1D5PE78;A0A1D5PHW7	A0A3Q2UBY4	904	914	no	2	6.2e-15	199.03	1501800000	37570	143090	58030	47386	97269	213350	86218	78524	78581
LCTSTTESEVKR	12	1	1409.68	D0VX31;F1NAC6	D0VX31	345	356	yes	3	2.57e-20	198.97	374560000	0	0	0	21608	67423	46944	125270	74684	77632
VESLSDVEVILQQSAGDIAR	20	0	2128.1	A0A3Q2TWS9;F1NJ23;A0A3Q2TYK2	A0A3Q2TWS9	1415	1434	yes	3	9.03e-93	198.96	512880000	36803	60427	55916	19562	28759	29603	49161	73759	62503
ETSKEDSGTYEITVANVVGQK	21	1	2254.1	A0A3Q2TS15	A0A3Q2TS15	2727	2747	yes	2;3;4	1.31e-70	198.9	12812000000	135360	282380	281680	50602	138340	122130	341870	286470	286440
YVADSPINR	9	0	1033.52	A0A3Q3A4C6;A0A1D5NY50;Q9DEH4	A0A3Q3A4C6	1738	1746	no	2	0.00029019	198.87	30558000000	213970	341190	358270	157580	371630	266660	303900	221690	234060
YCITVTNPVGEDSATLHVR	19	0	2131.04	P16419	P16419	608	626	yes	2;3	4.52e-49	198.81	930800000	12601	17031	20303	15813	23791	23596	4089.5	5144.9	6711.6
NEESLDSVLCYDPVAMK	17	0	1968.88	A0A1D5P0B5	A0A1D5P0B5	410	426	yes	2;3	3.18e-45	198.74	6486200000	228960	518550	524940	113390	353440	329760	393940	324830	285940
CAELEEELK	9	0	1119.51	P04268;F1NM23;A0A1D5P342;A0A1D5NVL7;Q91968;A0A1D5PSX3;Q91005;A0A1L1RU52;Q8AWI4;A0A452J839;Q90739	P04268	190	198	no	2;3	9.41e-40	198.65	930820000000	2434700	7381100	7867200	2298100	11747000	7809100	9653100	7556500	7203300
EYDSISR	7	0	868.393	A0A1D5NV75;A0A1D5NUZ0	A0A1D5NV75	265	271	yes	2	1.33e-21	198.64	638530000	33035	26609	27404	0	0	0	63950	45691	55615
VFADYESYVK	10	0	1219.58	A0A3Q3AC33	A0A3Q3AC33	95	104	yes	2;3	1.72e-12	198.58	120560000000	1404100	2211600	2142500	872070	1528300	1751200	2131600	2057100	1958200
PAPDFTATAVMPDGQFK	17	0	1791.85	P0CB50	P0CB50	11	27	yes	2;3	3.27e-45	198.49	2822800000	92044	213850	241070	36194	103390	106280	197250	161820	160940
GLDLQGLLDDMEK	13	0	1445.71	P00504;F1NTM7	P00504	167	179	yes	2;3	2.65e-26	198.49	1219700000	53822	110510	128070	109400	152040	324730	162880	287630	307770
SMDAVEQAAAEMK	13	0	1379.61	A0A3Q2UD12;P15989;F1P2F0;A0A1D5PGD5;A0A3Q3AR07;A0A3Q2UMJ2;A0A3Q2U4U7	A0A3Q2UD12	354	366	yes	2;3	1.69e-20	198.49	2208300000	85561	110350	137430	61153	124100	102890	254770	173790	170290
CCNSAGIGEPSEATEATVVDDKLDIPKPPGR	31	2	3282.55	F1N9Z6;A0A1D5PSF9;Q90724	F1N9Z6	716	746	yes	4;5	2.26e-134	198.4	6114100000	33105	114770	105760	30222	110660	102690	137340	136970	116240
AASHQEEFGAEALTR	15	0	1615.76	P02001	P02001	17	31	yes	2;3	1.58e-35	198.38	31475000000	154700	181030	195780	202630	306110	291510	238450	150290	152740
LKGADPEDVIMGAFK	15	1	1589.81	P02609;A0A3Q3A970	P02609	90	104	yes	2;3;4	2.75e-28	198.33	19093000000	194860	440180	329220	79028	212500	90778	550430	548210	412530
VMDHVIDQEFSVPDLIQGK	19	0	2169.08	A6BM71;A6BLM5	A6BM71	7774	7792	yes	2;3;4;5	4.75e-57	198.33	15951000000	291080	558650	584090	150950	190060	272590	326100	531800	489390
CCDVSQDNLPK	11	0	1334.56	Q5ZHV4	Q5ZHV4	144	154	yes	2;3	6.74e-15	198.25	14272000000	105950	278280	259900	122470	478190	360220	501670	377740	367810
AEAEWLKGEESLPTTTVDTTTDCTTFK	27	1	3030.4	A6BM71;A6BLM5	A6BM71	7266	7292	yes	3;4	4.35e-120	198.24	9077500000	91161	216030	202000	65852	190770	147580	428220	345300	307360
SAQVLAQPEDGASAPLLR	18	0	1821.96	A0A3Q2U5W6;A0A3Q2UFB1	A0A3Q2U5W6	386	403	yes	2;3	1.92e-37	198.16	1000200000	23614	35534	37506	17337	41475	34118	172570	135850	137340
MMSNLCSQQDVFSGK	15	0	1730.74	A0A1D5NW68;P19121	A0A1D5NW68	238	252	no	2;3	1.05e-28	198.14	22997000000	456920	440150	536770	200340	386010	410740	434800	340280	434130
EQQDDFKEAFLLFDR	15	1	1899.9	P02604	P02604	48	62	yes	2;3	2.93e-35	198.07	13511000000	302500	758330	172720	284580	536590	251020	243850	787410	458550
LKGEPLTESPDCEIK	15	1	1714.84	A6BM71;A6BLM5	A6BM71	6378	6392	yes	2;3	2.99e-35	197.88	6477700000	109930	309780	347180	83712	206320	215500	312700	250670	283080
GYYPQGGGEVIVR	13	0	1393.7	E1C1Y0	E1C1Y0	159	171	yes	2	2.86e-26	197.73	387280000	43724	54373	62149	15315	27907	24417	90233	71109	76775
YETDAIQR	8	0	994.472	A0A1D5P525;Q9DGM4;A0A1D5P603;A0A1D5PUR6;A0A1D5NVW6;A0A1D5NYC2;A0A1D5P600;Q90WH5;A0A1D5PFB7;A0A1D5NXZ4;F1P3X1;P02565;P13538;Q910C5;Q90767;Q9DGM5;R4GIG1;A0A1D5NZY9;F1NM49;Q9IBD4;P29616;Q8UWA0;P79793;Q91411	P13538	1378	1385	no	2;3	1.17e-12	197.6	259550000000	724180	990560	1126700	626340	1107500	1098200	1319500	1046100	1216100
SLGELIHTLNGAK	13	0	1351.75	P00940	P00940	20	32	yes	2;3	1.28e-21	197.31	1875500000	151720	228360	104100	0	0	0	22068	73644	50512
VPGPPGTPFVTAASK	15	0	1424.77	A0A3Q2TS15	A0A3Q2TS15	3940	3954	yes	2;3	1.02e-28	197.31	12595000000	69603	124020	139170	64277	139530	118840	195870	162830	158330
INQQLDTK	8	0	958.508	A0A1D5P525;Q9DGM4;A0A1D5P603;A0A1D5PUR6;A0A1D5NVW6;A0A1D5NYC2;F1P3X1;P02565;P13538;Q9DGM5;R4GIG1	P13538	446	453	no	2;3	3.17e-09	197.3	294510000000	2041000	4087300	4184200	1387900	3917900	2971500	4807900	3530700	3713400
IAPPTLLLYVDAGK	14	0	1469.85	P05081	P05081	110	123	yes	2;3	1.81e-40	197.3	2857400000	32282	79344	49542	39432	37988	71043	62194	148960	104540
VSAPDVTSSK	10	0	989.503	A6BM71;Q98918;Q9YH41	A6BM71	2195	2204	no	2;3	5.08e-06	197.27	11389000000	219650	382600	420180	246470	586740	450240	446300	354310	382450
ASWTALSVDEK	11	0	1205.59	Q5ZJV5	Q5ZJV5	70	80	yes	2;3	7.47e-15	197.21	3500000000	198590	294960	306300	126610	371560	319690	298420	211020	250490
TYDATTHFETTCDDIKDIYK	20	1	2436.08	F1NCZ2;O93382	F1NCZ2	594	613	yes	4	2.9e-70	197.21	647170000	14782	35004	41079	13168	31312	47399	99999	185910	164670
ISLALEDQTVR	11	0	1243.68	A0A1D5PCL3;A0A3Q3AWG5;A0A3Q3A8C1;A0A1D5PBR5;E1C5Z5;A0A3Q2UBY4;A0A1D5PE78;A0A1D5PHW7	A0A3Q2UBY4	432	442	no	2	7.47e-15	197.21	4503800000	74508	258720	181600	40230	112030	254170	72086	69212	74825
LQTESGEYSR	10	0	1168.54	A0A1D5P603;A0A1D5PUR6;A0A1D5NVW6;P02565;Q9DGM5;R4GIG1	A0A1D5PUR6	1284	1293	no	2	4.74e-12	197.21	277760000000	372320	1042100	594510	552300	1207400	1539300	1749600	337050	308360
VVDLLATESDIVCR	14	0	1588.81	F1NVD4	F1NVD4	48	61	yes	2;3	6.07e-61	197.07	2692600000	9128.7	14629	13666	465.03	1479.7	1283.3	6541.1	8519.8	7232.7
GFLGPEQLPECLK	13	0	1486.75	E1BVT3	E1BVT3	78	90	yes	2;3	4.3e-20	197.07	8573000000	255670	385930	397030	68235	138010	161690	195200	161090	183450
HLIPAANTGESK	12	0	1236.65	Q5ZMT0;F1P2P9	Q5ZMT0	107	118	yes	2;3	6.23e-14	197.06	5225900000	59572	128440	140760	11873	28741	30807	164390	132000	127860
EFTGLGDCIVK	11	0	1237.6	Q5ZMJ6	Q5ZMJ6	153	163	yes	2;3	2.14e-09	197.06	32872000000	285560	406980	425610	356510	770450	694040	1365000	928900	1072000
YALYDATYETK	11	0	1336.62	P21566;A0A1D5NYP3;A0A452J7T9	P21566	82	92	yes	2;3	7.57e-15	197.06	5117900000	211800	369610	382610	125370	248980	218100	194530	149740	160080
DEEIDQLKR	9	1	1144.57	A0A1D5P525;Q9DGM4;A0A1D5P603;A0A1D5PUR6;A0A1D5NVW6;A0A1D5NYC2;F1P3X1;P02565;P13538;Q9DGM5;R4GIG1	P13538	1583	1591	no	2;3	0.00014339	196.99	111550000000	472240	1197500	1253900	433080	1281900	1005200	1932200	1385900	1464900
LCPGTTDVTR	10	0	1118.54	A0A3Q2UD12;P15989;F1P2F0;A0A1D5PGD5;A0A3Q3AR07;A0A3Q2UMJ2;A0A3Q2U4U7	A0A3Q2UD12	1620	1629	yes	2	6.37e-06	196.99	1433900000	64911	109610	111730	36412	64217	57345	260140	172400	181160
AFEDDDITHVEGSVDPVR	18	0	1999.91	Q5ZM25;A0A452J806	Q5ZM25	126	143	yes	2;3	7.04e-79	196.87	8152800000	53194	55378	66202	40967	51296	54514	21023	18847	24643
LEAADEGSGDVK	12	0	1189.55	Q5ZJA7;A0A3Q3ARC0;A0A3Q2U6U8;A0A1D5P975;E1BTL0	Q5ZJA7	332	343	no	2;3	5.14e-14	196.76	1636100000	65294	91409	106880	67901	126530	115140	137390	82705	110820
GWEEGVAQMSVGQR	14	0	1532.7	Q90ZG0	Q90ZG0	59	72	yes	2	2.2e-27	196.7	717160000	44436	51444	56514	34488	53785	53976	61505	55921	57394
NTNDANSCQIIIPQNQVNR	19	0	2198.05	F1NCZ2;O93382	F1NCZ2	501	519	yes	2;3	3.54e-38	196.58	1664500000	11230	33091	29756	12807	48588	42966	99632	64085	65378
QEGYSATAEAQMK	13	0	1412.62	A6BM71;Q98918;Q9IAR9	A6BM71	346	358	no	2;3	3.18e-26	196.57	11416000000	145870	269230	281450	282640	665310	536160	508270	373160	381860
ELSLSNNTLGDTAVK	15	0	1560.8	Q5ZIY8;A0A1L1RUF2	Q5ZIY8	169	183	yes	2	1.54e-33	196.5	69192000	0	0	0	0	0	0	21976	18447	19297
EPGPPGTPFVTIVTK	15	0	1538.83	A0A3Q2TS15	A0A3Q2TS15	2858	2872	yes	2;3	1.54e-33	196.5	12420000000	79377	157400	162760	91576	160030	191370	120980	115830	119560
ADTDDGLGGGTK	12	0	1105.49	A0A1D5PUM7;E1C7I7	A0A1D5PUM7	314	325	no	2;3	6.72e-14	196.48	6226700000	182170	295240	342200	140020	397150	244730	404460	422770	398740
ANDTQEFNLSR	11	0	1293.59	A0A1D5PI23	A0A1D5PI23	89	99	yes	2	1.61e-11	196.44	1414500000	51821	83280	84961	41035	101820	65204	52227	34693	34849
STAGDTHLGGEDFDNR	16	0	1690.72	Q7SX63;B3VHV2;B6EAX2;P08106;A0A346RQZ3;D6PVB7;A0A1D5PYK0;A0A1D5PFJ6;F1NWP3;A0A1L1RPG0;O73885	Q7SX63	224	239	no	2;3	1.15e-42	196.38	57132000000	267950	275720	310760	144160	189320	172690	474200	341060	368660
KIQHELEEAEER	12	1	1509.74	A0A1D5P525;Q9DGM4;A0A1D5P603;A0A1D5PUR6;A0A1D5NVW6;Q90900;A0A1D5NYC2;F1P3X1;P02565;P13538;Q9DGM5;R4GIG1	P13538	1901	1912	no	2;3;4	1.73e-18	196.38	366950000000	1001700	1390100	1807100	737840	966250	1354500	1027600	1598700	1424400
NEAGEDSALINIK	13	0	1372.68	A0A1D5PCL3;A0A3Q3AWG5;A0A3Q3A8C1;A0A1D5PBR5;E1C5Z5;A0A3Q2UBY4;A0A1D5PE78;A0A1D5PHW7	A0A3Q2UBY4	599	611	no	2;3	2.48e-24	196.38	13160000000	172450	571570	319180	151620	445590	669280	304930	223150	241910
GKDFVMTEVENGGMLGSK	18	1	1897.89	A0A1D5P9V0;P00548;F1NW43	A0A1D5P9V0	208	225	no	2;3;4	1.28e-54	196.3	17792000000	1057200	1551400	1154900	287460	478200	582130	950640	1189200	1038600
AYSTVNANCHK	11	0	1263.57	A0A3Q2TS15	A0A3Q2TS15	1433	1443	yes	2;3	1.01e-15	196.27	11314000000	130180	195830	182930	73902	155320	120700	227150	157860	176460
VSGLTEGHEYEYR	13	0	1538.7	A0A3Q2TS15	A0A3Q2TS15	1152	1164	yes	2;3	1.8e-21	196.24	54558000000	221390	318570	357870	178090	330670	342250	262490	242130	265900
DGVTEGGQIHQQVQR	15	0	1650.81	A0A1D5NWH9;Q90650	A0A1D5NWH9	189	203	yes	3	3.59e-33	196.18	4328000000	76735	109290	114840	33302	74647	57493	90212	59789	63991
VDQDQENLTGLR	12	0	1386.67	Q9DEH4;A0A3Q2U8G4	Q9DEH4	2219	2230	yes	2;3	1.71e-17	196.16	16872000000	216640	359190	384090	120670	265170	226950	292500	215560	271620
FVPEELGPHSVAVK	14	0	1507.8	Q90WF0	Q90WF0	2213	2226	yes	2;3	3.18e-29	196.11	4668300000	181610	346680	358440	36934	61963	68812	333970	270790	266200
PTSIEWDGCDPQK	13	0	1531.66	A0A1L1S091	A0A1L1S091	48	60	yes	2;3	6.8e-24	196.11	2494400000	105160	226390	306400	8845.7	29982	40426	504340	440660	485940
TNQELNEINR	10	0	1229.6	P17785;A0A1C9KD18	P17785	136	145	yes	2	3.41e-09	196.07	3531000000	88384	83072	101270	32186	51986	40714	114350	74817	72885
SSEGNVLQAFK	11	0	1178.59	P16419	P16419	154	164	yes	2;3	2.39e-09	196.07	46624000000	78034	151960	161700	109810	352310	268060	335140	260320	285260
YTSVLNTPDFLR	12	0	1424.73	A0A3Q3A4C6;A0A1D5NY50;Q9DEH4	A0A3Q3A4C6	1526	1537	no	2	2.76e-14	195.8	5259900000	51626	105560	102520	51489	91208	103750	67223	63399	56580
NEELDAMIK	9	0	1061.51	P02609;A0A3Q3A970	P02609	63	71	yes	2;3	4.22e-11	195.79	1206700000000	3448500	10381000	10938000	3497600	13897000	10172000	15658000	11711000	11636000
EVGSDLEDAK	10	0	1061.49	F1P0N2	F1P0N2	412	421	yes	2;3	5.48e-09	195.79	42324000000	355830	745510	718610	242320	671200	484640	864130	549700	637340
ESLSGQGDAR	10	0	1018.47	A0A1D5PUM7;E1C7I7	A0A1D5PUM7	1463	1472	no	2	5.48e-09	195.79	7379500000	132480	157780	197720	91069	180850	147260	89734	107180	112490
LSEFLTTSCR	10	0	1212.58	A0A1D5P061;A0A1D5PVZ4;E1BQZ7	A0A1D5P061	604	613	yes	2	7.15e-06	195.57	1280800000	42797	63284	62420	36384	68604	62616	86552	62369	68359
SAGDEGQAALAIVQASQK	18	0	1742.88	A0A1D5NTD0;A0A1D5PLW8	A0A1D5NTD0	1161	1178	yes	2	1.17e-53	195.54	55605000	0	0	0	0	0	0	34211	25850	25695
FTDEEVDELYR	11	0	1414.63	P24032;A0A1L1RUU9;A0A1L1RM08	P24032	134	144	yes	2	2.53e-09	195.36	1267400000	39325	43197	54232	16258	26688	27588	61756	50813	56556
ICAINSEGVGEPAAIPGTVIAADK	24	0	2352.2	A0A3Q2TS15	A0A3Q2TS15	4514	4537	yes	2;3;4	2.97e-107	195.28	13702000000	188200	372810	426250	55645	126440	147790	397280	396150	402820
DAIAGIGTDEK	11	0	1088.54	Q6B344;A0A1D5PY67;E1BWX1;P51901	Q6B344	101	111	yes	2;3	3.15e-09	195.27	7305700000	206150	357400	382320	148510	354720	303970	298660	203550	199920
HGESAWNLENR	11	0	1311.6	Q5ZLN1;F1NHM9	Q5ZLN1	11	21	yes	2;3	4.34e-17	195.27	98343000000	440140	735010	853180	288020	466230	656710	797820	833820	830270
NCSETQYESK	10	0	1244.5	Q5F3W6;F1NMY1;A0A3Q2U4C6	Q5F3W6	111	120	yes	2;3	5.07e-06	195.27	14966000000	76062	223190	225290	63097	306930	234310	291320	200320	218190
ILACDDLDEAAK	12	0	1332.62	Q5F3B9	Q5F3B9	427	438	yes	2;3	5.71e-17	195.27	5004200000	230270	348210	381510	164380	429720	367930	269960	171960	208370
SSMAQLESSTSK	12	0	1254.58	P79757;A0A3Q2UNJ2	P79757	904	915	yes	2;3	4.32e-19	195.25	719050000	15145	32444	32878	23232	75820	61985	162310	99597	113350
EVSLEDVDPDVMGK	14	0	1531.71	E1C1U8	E1C1U8	68	81	yes	2;3	6.35e-33	195.25	896890000	52851	69407	69013	22845	47060	44382	19782	13486	13857
ATTSEMEAAVASCK	14	0	1454.64	E1C155	E1C155	45	58	yes	2;3	1.25e-21	195.25	831890000	83550	93133	103080	73722	131010	116060	112900	81008	82267
DFTVSALHGDMDQK	14	0	1562.7	A0A1L1RUX2;A0A1D5PVM5;Q8JFP1;A0A1D5P2Y8	A0A1L1RUX2	260	273	yes	2;3;4	6.35e-33	195.25	2716400000	122770	130410	165430	84200	107910	112780	158590	127550	145380
ETLPAEQDLTTK	12	0	1344.68	A0A1L1RMC0;O42265	A0A1L1RMC0	197	208	yes	2;3	4.76e-14	195.25	1422900000	64437	90295	99986	75921	164530	128730	204750	142450	135840
EDTEEYNLR	9	0	1167.5	E1BZE6;A0A1D5PXH1	E1BZE6	133	141	yes	2	7.6e-07	195.17	1867200000	34366	36531	39970	16929	31206	34848	0	0	0
SLIADTTYK	9	0	1010.53	A0A3Q2TS15	A0A3Q2TS15	3993	4001	yes	2;3	7.6e-07	195.17	19475000000	165000	338530	348050	187830	505700	450830	343860	258270	275110
SQEDLKEQVAMVER	14	1	1660.81	A0A1D5P603;P02565;R4GIG1	A0A1D5P603	1667	1680	no	2;3	7.16e-25	195.15	66074000000	132620	320490	317540	271680	827460	231030	1534700	377160	269430
LCSAPAEER	9	0	1031.47	A0A1D5NW68;P19121	A0A1D5NW68	491	499	no	2	4.52e-30	195.06	80527000000	402020	468300	576690	359960	738450	683270	590250	395510	479620
VMEQLSNLR	9	0	1088.56	P08250	P08250	219	227	yes	2	0.0003639	195.05	1567500000	0	0	0	0	0	0	36572	44364	36645
KDFEISQIQSK	11	1	1321.69	A0A1D5P525;Q9DGM4;A0A1D5P603;A0A1D5PUR6;A0A1D5NVW6;A0A1D5NYC2;F1P3X1;P02565;P13538;Q9DGM5;R4GIG1	P13538	1086	1096	no	2;3;4	3.82e-12	194.96	59972000000	474170	1011000	1063800	420550	967040	980880	518410	505530	498550
VLDTPGPPSHVTTK	14	0	1447.77	A0A3Q2TS15	A0A3Q2TS15	5710	5723	yes	2;3	1.77e-24	194.96	17568000000	236410	320640	368300	196200	325480	316880	371680	308120	338120
VHIDSQADLSSFVIESAER	19	0	2102.03	P16419	P16419	584	602	yes	2;3	1.31e-54	194.94	6427900000	42266	64328	72818	103380	129740	155070	134630	188820	190140
DLYTVEANNPR	11	0	1290.62	A0A3Q3ATJ1;A0A3Q2TUF8;E1BST5;A0A3Q2U1Y1;A0A3Q2TVT0;A0A3Q2U938	A0A3Q3ATJ1	66	76	yes	2	4.26e-09	194.94	1077900000	43628	81643	82669	42376	113310	89807	97667	67211	67590
ESTTSEQSAR	10	0	1094.48	A0A1D5P0U8;A0A1L1RYK0	A0A1D5P0U8	240	249	yes	2	1.17e-08	194.94	688160000	14456	14746	17057	19070	39730	31173	34602	20902	23387
CNTEDSIR	8	0	993.419	A0A1D5PWV5	A0A1D5PWV5	18	25	yes	2	5.29e-06	194.9	1655000000	43728	50705	55697	4747.9	15914	11947	34921	25315	24486
FTQVPEDVIIEEGR	14	0	1630.82	A0A1D5NT92	A0A1D5NT92	267	280	yes	2;3	6.35e-22	194.86	2717600000	59173	97114	96394	39744	86157	81309	113220	85055	90855
AGPQSPIAATPAAPAATK	18	0	1618.87	A0A1L1RNL6	A0A1L1RNL6	578	595	yes	2;3	1.97e-53	194.85	1051700000	54019	98475	113240	9025.7	30147	23248	110790	80431	88462
AIANECQANFISIK	14	0	1577.79	Q5ZMU9;A0A182C6H1;A0A1D5P448;A0A1D5NTY5;A0A182C5X0;A0A1D5PXG2;A0A1D5PF52;A0A1D5P8L6	Q5ZMU9	530	543	yes	2	5.57e-22	194.7	339320000	41235	70331	67552	3851.5	8723.8	7302.2	37343	32008	29929
TAAEVAQVVLCAVGQK	16	0	1642.87	A0A3Q2UBH5;F1NH35	A0A3Q2UBH5	252	267	yes	2;3	2.16e-38	194.7	1053800000	55502	134220	133060	47087	110610	118380	34869	46356	38829
AAAQGGVTEEDVTK	14	0	1374.66	A0A1L1RXE9;D0VX29;F1P582	A0A1L1RXE9	337	350	yes	2;3	2.07e-24	194.7	6284500000	160160	208850	245250	111030	248690	185200	189380	118600	142440
ATSFTITDLKENQEYK	16	1	1886.93	A0A3Q2TS15	A0A3Q2TS15	1249	1264	yes	3	6.71e-42	194.58	347330000	71028	171980	132260	7766.4	16540	16160	0	0	0
VLSQQAAAVVK	11	0	1112.66	Q683M9;Q5U7A2;P21265;E1BR00;Q5U7A3	Q683M9	406	416	yes	2;3	5.59e-12	194.54	2435500000	78033	131910	164960	36061	79762	66250	154230	122980	124930
GVYECSCGTDK	11	0	1274.49	A6BM71;A6BLM5	A6BM71	5966	5976	yes	2;3	5.59e-12	194.54	21240000000	373610	655350	686220	272290	649400	544770	631960	454890	519240
YVMTLENAAGK	11	0	1195.59	A0A3Q2TS15	A0A3Q2TS15	281	291	yes	2;3	5.59e-12	194.54	6314900000	178500	358120	351630	71611	190830	141780	420530	331250	336940
DVIELTDDSFDK	12	0	1395.64	F1NK96;Q5F472	F1NK96	167	178	yes	2;3	9.16e-17	194.5	382230000	12635	22114	28141	8874.2	16146	17218	62238	55763	57066
MNLGMDASTFK	11	0	1213.55	A0A1D5PCL0;Q90985	A0A1D5PCL0	1190	1200	no	2;3	5.75e-21	194.5	728290000	0	0	0	61524	167370	140470	251910	213840	213850
MNIPVLSDLTK	11	0	1229.67	A0A1D5PBY3;A0A1D5PNR4	A0A1D5PBY3	134	144	yes	2;3	5.7e-12	194.5	4530000000	74957	133720	145580	38284	86830	91424	146970	123570	129320
DSYGAMADCCSK	12	0	1363.48	A0A1D5NW68;P19121	A0A1D5NW68	59	70	no	2;3	9.16e-17	194.5	35743000000	767210	1155200	1320700	314610	888000	799260	1081600	739810	849180
IMNVIGEPIDER	12	0	1384.7	Q5ZLC5;A0A1L1RY04	Q5ZLC5	149	160	yes	2;3	9.25e-17	194.48	17378000000	264760	337760	395580	155480	277250	264330	457550	350520	374190
DLTTAGAVTQCYR	13	0	1454.68	F1NPD3	F1NPD3	70	82	yes	2	3.39e-23	194.43	856970000	38755	54978	64130	19090	33461	28495	94465	54802	63458
EPSNEPAFITQPK	13	0	1456.72	P79757;A0A3Q2UNJ2	P79757	729	741	yes	2;3	4.18e-20	194.39	8279400000	174990	256010	264510	95411	203470	171070	198040	134620	153330
YSDIEPSTEGEVIYR	15	0	1756.82	A0A3Q2TWS9;F1NJ23;Q01635;E1C700;A0A1D5PMA9;O57484	A0A3Q2TWS9	57	71	no	2;3	1.16e-28	194.39	3654200000	109520	90976	96140	105780	126630	113630	163250	107190	118450
SSAAYSHGSESINK	14	0	1436.65	F1N9Z6;A0A1D5PSF9	F1N9Z6	115	128	yes	2;3	2.04e-34	194.3	5692900000	237900	228150	247940	106240	124380	123600	156000	93013	154000
LQGPQTSAELNHILK	15	0	1647.89	A0A3Q8WI14;A0A1D5PA73	A0A3Q8WI14	297	311	yes	2;3;4	1.79e-31	194.3	15338000000	87022	158630	174520	362480	807190	684550	234840	190160	197390
NEELITPASDPAK	13	0	1383.69	F1NNW0;Q02173;A0A1D5PKV3	F1NNW0	178	190	yes	2;3;4	4.18e-20	194.29	49576000000	450770	732760	741210	309520	780250	591810	863210	672960	692860
YAAVTQFEATDAR	13	0	1441.68	A0A3Q2UDT6;A0A1D5PKA9;Q5F3J3	A0A3Q2UDT6	303	315	yes	2	2.84e-20	194.29	786560000	24803	29249	31155	58426	110180	101630	92873	62554	74173
EIWGTEPTR	9	0	1087.53	A0A3Q3AC33	A0A3Q3AC33	141	149	yes	2;3	1.29e-06	194.22	319070000000	1186600	1523200	1513400	968550	1682100	1521100	1494800	1242800	1220000
DNPQLAASPDR	11	0	1182.56	F1NSZ5	F1NSZ5	874	884	yes	2	6.64e-12	194.17	480680000	0	0	0	26427	44990	36082	71482	31674	29729
EGDVLTLLESER	12	0	1359.69	A0A3Q2U825	A0A3Q2U825	52	63	yes	2	3.05e-14	194.17	3521300000	103440	168490	178190	150940	252400	260210	174840	160220	158120
MFVLDEADEMLSR	13	0	1554.71	A0A1L1RUX2;A0A1D5PVM5;Q8JFP1;A0A1D5P2Y8	A0A1L1RUX2	142	154	yes	2;3	3.82e-23	194.17	3610200000	91897	116970	100170	153970	149400	188420	147980	253400	215540
GIPQASEYQAK	11	0	1190.59	P08250	P08250	208	218	yes	2;3	6.78e-12	194.12	9737600000	132730	218950	201900	106050	261180	266250	354760	273810	183500
ECYCPPDFPSALYCDSR	17	0	2135.84	A0A1D5PAN0	A0A1D5PAN0	123	139	yes	2;3	5.37e-42	194.06	901390000	37410	44406	61153	34297	50801	58428	91371	55577	55788
AGVMGPAGNR	10	0	928.455	P02467	P02467	413	422	yes	2	1.87e-08	193.98	15414000000	218340	175390	361470	157480	184190	298360	356440	155260	184620
TGTLTTNR	8	0	862.451	A0A1D5PI89;A0A1D5P9R7;A0A1D5PXK5;A0A3Q2U0I3	A0A1D5PI89	514	521	yes	2	8.29e-06	193.96	477370000	31989	65344	65965	24278	64648	60537	56468	47328	56806
ADSSVSQEQLR	11	0	1218.58	Q1G1I6;A0A3Q2TZM7	Q1G1I6	176	186	yes	2;3	7.58e-12	193.83	3002500000	73858	75451	68565	43984	61544	60387	97551	60553	61492
GEPTELSCAVNR	12	0	1331.61	A0A1D5PUM7;E1C7I7	A0A1D5PUM7	1583	1594	no	2;3	1.22e-16	193.83	11691000000	173840	173330	206580	119120	205950	164300	220590	222660	220000
LYTEAWDADK	10	0	1210.55	Q9DEG4	Q9DEG4	250	259	yes	2;3	1.98e-08	193.82	14301000000	324440	702570	733250	221950	592160	518310	468000	386650	410930
LESCYLQHEDEQCTAQIPGR	20	0	2433.07	F1NII7	F1NII7	954	973	yes	3	3.95e-67	193.8	4241600000	37370	52004	54751	26658	48349	52562	59079	40615	37859
KPNVLSCDVTGCGETPK	17	1	1860.87	A0A1D5PLW0;A0A1D5P984;Q90577	A0A1D5PLW0	768	784	no	2;3;4	1.99e-42	193.8	7670600000	74437	137240	162110	54966	142300	114230	90897	69924	72122
NTVHEDGGIYSLTVENPAGSK	21	0	2187.04	Q07784	Q07784	623	643	yes	2;3;4	7.64e-65	193.64	23165000000	189560	369250	392100	130780	221710	251150	190470	147020	162840
QETTPINDNVSQCCSSSYANR	21	0	2430.02	A0A1D5NW68	A0A1D5NW68	442	462	yes	2;3	1.54e-67	193.54	10645000000	32085	35057	37186	24594	49977	52602	38286	23928	29824
SLGEISALTAK	11	0	1088.61	P12003;F1NYY0	P12003	434	444	yes	2;3	3.12e-09	193.52	1103900000	115620	238530	251630	50846	143840	132470	455450	283040	273850
PAAISVPGPEPK	12	0	1161.64	A6BM71;A6BLM5;A6BM73;A6BLM6;A6BLM8;A6BLM7	A6BM71	5254	5265	no	2;3	1.36e-16	193.52	6751100000	80828	175310	226780	362130	947980	849930	536180	330870	341490
CTWNDIGALVEK	12	0	1404.67	F1NX83;A0A1D5PF87	F1NX83	192	203	yes	2;3	1.37e-16	193.49	3171100000	150070	401790	320330	124270	259490	352280	187510	242390	213760
DPITVPDRPEDLEVK	15	1	1721.88	Q07784	Q07784	57	71	yes	2;3;4	2.18e-41	193.47	63263000000	387490	652700	703070	333080	684510	685330	1474200	1207600	1285000
CIAGTEDWQR	10	0	1234.54	F1N9Z6;A0A1D5PSF9;Q90724	F1N9Z6	678	687	yes	2	2.28e-08	193.41	18879000000	162900	366980	286800	87362	268080	372530	267640	238450	234770
VVSMTDDGK	9	0	950.438	A6BM71;A6BLM5	A6BM71	6210	6218	yes	2;3	1.74e-06	193.41	19767000000	381330	715330	760960	282680	761390	590990	644490	430880	461760
MELQEIQLK	9	0	1130.6	Q5ZLJ7;A0A1D5P9B0;A0A1D5P2B9;A0A1D5PV56;A0A1L1RJZ6;A0A1L1RVU7;H9L3K0;H9L074	H9L3K0	141	149	no	2;3	1.38e-10	193.38	227980000000	1100100	2342200	2412400	1744900	3705300	3857100	3267100	3249100	3265300
AAETADTIAK	10	0	989.503	E1BZN6;A0A1L1RXA5	E1BZN6	163	172	yes	2;3	6.44e-06	193.38	4463100000	249750	305690	322870	220880	383510	296420	319620	224570	266640
SLGLPITDEQIK	12	0	1312.72	Q683M9;Q5U7A2;P21265;E1BR00;Q5U7A3	Q683M9	53	64	yes	2;3	8.72e-14	193.3	2408100000	111240	212380	242800	22973	50368	53061	212560	177590	186280
VLDTPGAPQDLK	12	0	1252.67	A0A3Q2TS15	A0A3Q2TS15	1384	1395	yes	2;3	1.16e-13	193.3	19727000000	161920	317950	327880	133100	361290	270330	323210	244320	255700
GTEFTVNDLQGK	12	0	1307.64	Q4ADJ7;Q4ADJ6;Q4ADG4;P02789;E1BQC2	Q4ADJ7	120	131	yes	2	8.86e-14	193.28	906770000	55633	75652	69880	79540	206650	159000	288860	192570	206340
VLGAISQPELIQK	13	0	1394.81	A0A3Q2UDT6;A0A1D5PKA9	A0A3Q2UDT6	912	924	yes	2;3	5.25e-23	193.28	537460000	48071	82471	87881	46302	93553	98160	0	0	0
VDQLQEGCYYFFR	13	0	1723.77	A0A3Q2TS15	A0A3Q2TS15	2530	2542	yes	2	5.33e-23	193.23	1012000000	60605	131230	90585	34193	40501	54828	35944	83706	65800
YVVDSETVQANMAR	14	0	1581.75	F1NH40	F1NH40	890	903	yes	2	3.75e-24	193.21	459760000	29270	35896	36157	21096	40350	31986	80902	58896	59589
NTGIICTIGPASR	13	0	1358.7	A0A1D5P9V0;P00548;F1NW43	A0A1D5P9V0	63	75	no	1;2;3	5.46e-23	193.15	79970000000	371760	737230	761330	100550	349730	272910	834210	645120	623390
PGLLLGDEAPNFEADTTQGR	20	0	2100.01	F1NBV0	F1NBV0	2	21	yes	2;3	1.96e-66	193.06	3652600000	88338	178680	204990	59879	146850	140190	203900	184540	193260
DTSTTTWNIVSATVAR	16	0	1721.86	A0A3Q2TS15	A0A3Q2TS15	3882	3897	yes	2;3	2.59e-41	193.06	5662400000	50375	100660	98231	17753	29965	33938	69885	71591	61878
YGQSFALESAPVVAQYPYK	19	0	2117.05	A0A3Q2TS15	A0A3Q2TS15	2839	2857	yes	2;3;4	9.84e-39	193.06	5070300000	128960	319700	295280	45636	85713	93040	79447	74204	75128
AAYFGVYDTAK	11	0	1204.58	Q5ZMJ6	Q5ZMJ6	189	199	yes	2;3	1.01e-11	192.92	7029900000	29923	45743	39139	32308	60289	48567	114860	77902	85977
LVDGPNQCAGR	11	0	1185.56	Q98TD1;A0A1L1S0P1	Q98TD1	361	371	yes	2	1.02e-11	192.91	1001500000	68968	68398	71028	30639	53665	41474	80433	54973	51641
LRDEAEFQR	9	1	1162.57	F1N9Z6;A0A1D5PSF9;Q90724	F1N9Z6	1247	1255	yes	2;3	5.96e-10	192.91	15516000000	199460	244640	273200	187980	329640	388560	230000	261210	269450
GTVQPASNFNDDGDAQVLR	19	0	2002.93	Q6B344;A0A1D5PY67;E1BWX1;P51901	Q6B344	353	371	yes	2	1.2e-53	192.78	3245700000	42680	42287	44067	41953	68882	56694	42311	33111	31939
VNVEVEHAEPEPERR	15	1	1788.88	A6BM71;Q98918;Q9IAR9	A6BM71	1373	1387	no	2;3;4	2.58e-48	192.78	26495000000	184430	162180	181950	113180	131220	146990	146710	144800	155360
EIEEPFEKDQIGSSAMPYK	19	1	2197.02	Q683M9;Q5U7A2;P21265;E1BR00	Q683M9	278	296	yes	3	5.64e-54	192.69	331520000	51690	83086	90867	14860	33181	28498	0	0	0
AFFENAAEDLEK	12	0	1382.64	A0A1D5PCL0;Q90985	A0A1D5PCL0	2949	2960	no	2;3	1.74e-16	192.68	1546100000	94001	192790	199890	99377	199940	203100	444410	439290	430870
GSYGDLGGPIITTQVTIPK	19	0	1916.03	A0A1D5PXG0;Q5ZIQ3;E1C453;A0A175KE57;A0A1D5PSI3;A0A182C5Y6	A0A1D5PXG0	341	359	yes	2	1.25e-53	192.63	143750000	0	0	0	0	0	0	15010	10855	10212
LAGESESNLR	10	0	1074.53	Q5ZMU9;A0A182C6H1;A0A1D5P448;A0A1D5NTY5;A0A182C5X0;A0A1D5PXG2;A0A1D5PF52;A0A1D5P8L6	Q5ZMU9	278	287	yes	2	2.87e-08	192.6	4375500000	99608	134710	140980	104160	179930	139350	253440	178120	195350
VVERPGPPQAVR	12	1	1303.74	P16419	P16419	920	931	yes	2;3	1.11e-25	192.6	48860000000	136630	223540	230170	69173	156250	119710	359070	252320	275030
SSNYLSTLEIPRPQVVDCGEYSCK	24	1	2801.3	A6BM71;Q98918	A6BM71	3233	3256	yes	3;4	5.05e-97	192.57	3339200000	65474	178300	182860	57285	111030	167210	218160	279670	242030
TVTNNLK	7	0	788.439	P04268;F1NM23;A0A1D5P342;A0A1D5NVL7;Q91968;A0A1D5PSX3;Q91005;A0A1L1RU52;Q8AWI4;A0A452J839;Q90739	P04268	199	205	no	2;3	9.83e-06	192.56	189280000000	825220	1743700	1882800	401710	1258100	887560	2498300	2099100	2086000
NSVSAINYIGK	11	0	1164.61	P20785;A0A1D5PWN6	P20785	115	125	yes	2	1.13e-11	192.5	350280000	0	0	0	18254	67425	66648	59097	34727	31729
LSIPLPLDLENK	12	0	1350.78	A0A3Q2UFS4	A0A3Q2UFS4	195	206	yes	2;3	1.87e-16	192.38	932530000	110760	211830	242990	57806	94811	114350	169950	175180	175280
DDITLQCELSK	11	0	1320.62	A6BM71;A6BLM5	A6BM71	5915	5925	yes	2;3	1.19e-11	192.3	4744900000	110840	252430	284870	104900	245590	244900	208910	158350	189830
YVNIQEPAMDMK	12	0	1437.66	A0A1D5PE41	A0A1D5PE41	37	48	yes	2;3	1.91e-16	192.3	382570000	38228	62667	71010	21984	47816	46143	184770	151100	168730
SYEEIEDSDK	10	0	1213.5	F1NNW0;Q02173;A0A1D5PKV3	F1NNW0	934	943	yes	2;3	6.81e-06	192.26	14025000000	194640	371510	406460	113070	244570	214450	380590	256400	340010
TVEGTTENIK	10	0	1090.55	D0VX31;F1NAC6	D0VX31	166	175	yes	2;3	6.21e-06	192.26	4297200000	90734	118320	141540	149250	334430	247310	258590	152340	180990
DVAYPPGPPANPR	13	0	1349.67	A0A3Q2TS15	A0A3Q2TS15	104	116	yes	2;3	2.95e-19	192.26	16427000000	257420	389530	442340	189810	416400	346760	614350	443990	499250
DMVDVYLETVK	11	0	1310.64	P08250	P08250	36	46	yes	2;3	1.24e-11	192.1	2567900000	141200	271070	291900	139480	204150	442430	335610	557090	471750
AVAALLTIPEVEK	13	0	1352.79	A0A1D5P2A5;E1BVC2	A0A1D5P2A5	1161	1173	yes	2;3	4.78e-20	192.1	790160000	79272	146080	151810	39847	74300	85076	95596	85514	84141
SNEDQALGNWQVK	13	0	1487.7	P13648	P13648	459	471	yes	2;3	2.46e-20	192.05	613760000	36916	65248	65362	9553.6	25096	25409	155550	102490	88038
YFAGNLASGGAAGATSLCFVYPLDFAR	27	0	2795.34	A0A1D5PCU1;Q5ZLG7;F1NJ10;Q8AYM3;Q5ZMJ6	Q5ZMJ6	112	138	no	3	8.05e-109	192.01	413190000	0	0	0	0	0	0	27736	20749	25684
EATSTPVLQEEDK	13	0	1445.69	Q8JG64	Q8JG64	481	493	yes	2;3	8.98e-20	191.79	1616300000	40687	93897	112370	46267	124340	100130	193700	149240	165840
SNYSIMLEPPEVK	13	0	1505.74	A0A3Q3A4C6;A0A1D5NY50;Q9DEH4	A0A3Q3A4C6	2056	2068	no	2;3	8.98e-20	191.79	2257400000	47878	107550	106520	99992	325030	261340	30531	25937	21385
SVMDATQIAGLNCLR	15	0	1647.81	A0A1D5PPF8	A0A1D5PPF8	155	169	yes	2;3	1.86e-31	191.79	379890000	10825	20910	20834	0	0	0	42636	39030	37951
DSCTAQLNVK	10	0	1134.53	A6BM71;Q08476	A6BM71	4205	4214	yes	2;3	3.13e-08	191.67	21869000000	241020	488380	486200	190060	545330	408980	708470	518550	551600
NLHDLEVNENETVR	14	0	1680.81	A6BM71;A6BLM5	A6BM71	6705	6718	yes	2;3	1.97e-28	191.53	58750000000	231560	224600	251160	375700	292590	282650	403330	282730	329950
YTDFSTGLIAGQCR	14	0	1587.74	A0A3Q2TWS9;F1NJ23	A0A3Q2TWS9	277	290	yes	2;3	9.26e-21	191.52	310100000	25138	49501	44921	12251	26132	23296	40020	36189	31096
MVEENMALER	10	0	1220.55	F1NNW0;Q02173;A0A1D5PKV3	F1NNW0	122	131	yes	2;3	2.71e-18	191.48	75442000000	617000	774570	843060	444510	852230	689390	1118300	807020	909530
GSGTAEVELK	10	0	989.503	A0A1D5P9V0;P00548;F1NW43	A0A1D5P9V0	145	154	no	2;3	5.04e-12	191.45	363790000000	2777200	3921700	4243300	2285400	4924000	3945000	4987400	3333000	3893600
PGSGYTNTMR	10	0	1082.48	A0A1D5P9V0;P00548;F1NW43	A0A1D5P9V0	536	545	no	2	4.65e-06	191.45	5316000000	87690	118080	375820	54342	98259	233350	40329	92337	61262
HLEGMSEEAIMELNLPTGIPIVYELDK	27	0	3040.51	Q5ZLN1;F1NHM9	Q5ZLN1	196	222	yes	3;4	9.1e-109	191.42	1613300000	45213	115000	27760	107380	98431	143330	26394	59201	55500
GTPTPMTPEMER	12	0	1345.6	Q9DEH4	Q9DEH4	2109	2120	yes	2;3	2.31e-16	191.4	22917000000	366000	437550	445820	212480	386290	278140	487180	351120	372160
ADAADQAAQSAR	12	0	1173.54	A0A1D5P1R0	A0A1D5P1R0	537	548	yes	2;3	2.34e-16	191.33	4337800000	66569	59280	59970	71885	102470	88478	86969	63425	70920
LGPISTDTITAAAPAQK	17	0	1653.89	Q91008;A5HUM6	Q91008	825	841	yes	2;3	3.95e-33	191.26	138680000	0	0	0	52962	105690	98073	26697	15282	15368
GATQQILDEAER	12	0	1329.65	Q5F424	Q5F424	377	388	yes	2	2.38e-16	191.26	2138400000	106080	73649	81266	38144	57594	43470	44949	28410	30109
DTTVGTLSQR	10	0	1076.55	Q5ZL99;F1NR71	Q5ZL99	181	190	yes	2	3.92e-08	191.17	877740000	96259	158370	157840	81455	189010	154110	150550	104350	111760
TLEEEVTVVK	10	0	1145.62	A6BM71;A6BLM5;A6BM73;A6BLM6;A6BLM8;A6BLM7	A6BM71	5455	5464	no	2;3	4.92e-25	191.16	55164000000	746810	1448400	1440900	582370	1663100	1313800	1100800	780800	822760
MADGGGQPQLR	11	0	1128.53	A0A3Q3ALM7	A0A3Q3ALM7	1019	1029	yes	2	1.51e-11	191.16	1226500000	92219	96887	108140	62530	147270	100810	195350	112250	122120
TEQLSQGQTALEELR	15	0	1701.85	Q5ZMQ7	Q5ZMQ7	673	687	yes	2;3	8.02e-29	191.06	2034700000	83828	138870	160750	84716	206420	169380	112190	92364	104750
IIQEQTVGQK	10	0	1142.63	Q6KCP2;A0A1D5P8K2	Q6KCP2	159	168	yes	2	9.81e-35	190.96	233380000	37182	72394	83060	8566.3	15212	12973	0	0	0
HYVQAWEDAK	10	0	1245.58	Q9DEG4	Q9DEG4	285	294	yes	2;3	5.22e-06	190.88	9428000000	144890	288350	274240	71778	121640	187120	209200	241050	230560
LPLMECVQVTK	11	0	1316.68	A0A1D5PUQ7;Q90YA3;F1NKB6;Q8AYP9	Q90YA3	334	344	no	2;3	3.29e-09	190.86	61556000000	199460	343470	395790	124750	240780	216000	646390	530180	512060
IFTSIGEDYDER	12	0	1443.65	P84173;D5M8S3	P84173	106	117	yes	2	2.56e-16	190.86	822220000	30937	24247	32366	38052	65146	59724	85008	72730	82283
EDQVFSMNPPK	11	0	1290.59	A0A1D5P525;Q9DGM4;A0A1D5PUR6;Q90914;A0A1D5NYC2;Q90909;F1P3X1;Q90908;P13538	P13538	75	85	no	1;2;3;4	1.49e-28	190.86	554450000000	4076000	7767100	7834100	3051200	7700200	6285500	9465400	8042900	8360000
IQLISNMLDK	10	0	1173.64	F1NU17;P51903	F1NU17	221	230	yes	2;3	4.15e-08	190.86	5197600000	12055	19862	245740	25095	42396	305740	22030	92332	36304
QDVDNASLAR	10	0	1087.53	F1NJ08;A0A1L1RXL9	F1NJ08	202	211	yes	2	4.15e-08	190.86	19613000000	80416	92602	77212	118270	200690	226700	272270	140430	148710
YETTANLGTAHLLR	14	0	1558.81	A0A1L1RXE9;D0VX29;F1P582	A0A1L1RXE9	75	88	yes	2;3	1.05e-20	190.85	1131700000	0	0	0	29123	59367	51263	64735	62046	58127
AGKPIICATQMLESMIK	17	1	1889.98	A0A1D5P9V0;P00548;F1NW43	A0A1D5P9V0	339	355	no	3	5.7e-42	190.81	950840000	190060	309390	506950	78410	51730	197570	0	0	0
TCSLDFTGAMEDISK	15	0	1673.73	F1P180;A0A1L1RPR4;P00508	F1P180	179	193	yes	2	5.22e-26	190.78	944730000	12443	31108	31843	13366	54756	42352	136900	95088	110180
YIDEEELNK	9	0	1151.53	P11501;A0A1D5PUL6;A0A1D5P5R0;A0A1L1RND0	P11501	280	288	yes	2;3	3.23e-06	190.73	29769000000	376770	643930	630720	288940	647230	476010	614870	447350	389100
SLEAQAEK	8	0	874.44	Q5ZLJ7;A0A1D5P9B0;A0A1D5P2B9;A0A1D5PV56;P04268;F1NM23;A0A1D5P342;A0A1D5NVL7;Q91968;A0A1D5PSX3;Q91005;A0A1L1RU52;H9L3K0;H9L074;Q8AWI4;A0A452J839;Q90739	P04268	206	213	no	2;3	4.26e-18	190.73	738670000000	3065700	5468700	6117200	2358200	6919800	4605400	5011900	3842100	4016700
LSEESEELR	9	0	1090.51	A6BM71;Q98918;Q9YH41;Q9IAR9	A6BM71	1717	1725	no	2	0.00038128	190.73	38604000000	159280	255860	258480	141000	345510	259100	341200	245210	270000
NVENMNFADIER	12	0	1450.65	F1NQH8;A0A1D5PQV3;Q5F326;A0A1D5PK94	F1NQH8	342	353	yes	2	1.01e-13	190.66	2373100000	83517	126690	132720	36304	89639	76933	169150	122090	138090
KKLETDISQIQSEMEDTIQEAR	22	2	2591.27	A0A1D5PUR6	A0A1D5PUR6	1732	1753	no	3;4	4.45e-81	190.63	846580000	15686	62549	35381	40576	74845	176290	0	0	0
EICGTPGYLAPEILQCSMDDEHEGYGK	27	0	3068.32	Q5ZJ45	Q5ZJ45	182	208	no	3;4	1.59e-108	190.57	4517200000	114150	139190	141350	55686	62346	91545	96310	110760	106010
DDEGEYVFYAGGK	13	0	1448.61	A6BM71;Q98918;Q9YH41	A6BM71	2324	2336	no	2;3	9.64e-23	190.56	4733700000	130050	215490	223430	54481	151010	167310	259230	230080	250870
IDSVDEER	8	0	961.435	P68246;E1BUD3	P68246	72	79	yes	2	1.94e-05	190.52	120420000000	408730	494040	579730	307910	376330	389230	445580	349940	456870
GAEAANVTGPDGVPVEGSR	19	0	1781.85	A0A1D5NWH9;Q90650	A0A1D5NWH9	141	159	yes	2;3	1.96e-53	190.41	5048200000	93198	104190	115860	61337	93261	81721	128620	83927	100830
TGQAEGFSYTDANK	14	0	1487.65	P67881	P67881	41	54	yes	2;3	3.65e-21	190.37	4258200000	71842	159520	180040	93646	224640	185130	218960	145350	165230
GTFTPVVTDPITER	14	0	1531.79	Q9DEH4;A0A3Q2U8G4	Q9DEH4	2178	2191	yes	2;3	3.56e-21	190.36	15903000000	180140	284160	255860	91518	164160	132150	223440	124940	121920
SLQEEIETLESR	12	0	1432.7	F1NP43	F1NP43	93	104	yes	2;3	8.14e-43	190.36	1211600000	14674	15865	17175	36087	57107	60375	50113	51581	50486
IDRPEAISEER	11	1	1313.66	Q5ZKG0;A0A1D5P973	Q5ZKG0	132	142	yes	3	7.81e-21	190.35	2886200000	40788	46836	59646	71130	109230	99271	69042	64195	72595
DSMVVQWHEPINDGGSK	17	0	1897.86	A0A3Q2TS15	A0A3Q2TS15	2873	2889	yes	2;3	1.67e-32	190.27	14435000000	189570	344560	377450	176780	297530	320160	237380	238390	238580
ELEDLSQK	8	0	960.476	P68246;E1BUD3	P68246	92	99	yes	2;3	2.02e-05	190.26	630890000000	1062000	2092800	2231300	856270	2291000	1800000	2053800	1523000	1650400
NFAEPGSNVYLR	12	0	1365.67	F1NX83;A0A1D5PF87	F1NX83	469	480	yes	2	2.83e-16	190.26	8177200000	14064	44284	37190	17187	47447	43199	24667	22585	23476
NTQGTLKDTQIHLDDALR	18	1	2038.04	A0A1D5NYC2;P13538	P13538	1648	1665	no	4	2.24e-53	190.24	2030800000	32511	62461	73400	56569	134540	144960	213220	222420	215630
ALAAGGYDVEK	11	0	1092.55	P08284;A0A452J861;P08285;P08287;P08288;F1NME1;P08286;P09987;F1NPJ2	P08284	66	76	no	2;3	1.77e-11	190.24	6168400000	211940	281340	286900	161680	336510	236540	385540	218920	227980
TVIQDTSFK	9	0	1037.54	A0A3Q2TS15	A0A3Q2TS15	2911	2919	yes	2;3	3.51e-06	190.24	23052000000	170960	342110	355880	191720	513630	444700	484730	350120	366360
DIEDIIDELK	10	0	1201.61	A0A1D5PI06	A0A1D5PI06	196	205	yes	2	4.6e-08	190.24	577450000	0	0	0	18727	37181	51260	113760	95706	112250
PMQFLGDEETVR	12	0	1420.67	Q5ZLN1;F1NHM9	Q5ZLN1	229	240	yes	2	2.87e-16	190.15	8360400000	243010	425950	510150	358590	712990	886040	317490	348280	329390
NEITNLSNAGK	11	0	1159.58	A0A1D5P0U8;A0A1L1RYK0	A0A1D5P0U8	112	122	yes	2;3	2.87e-09	190.15	2030800000	80945	169470	183520	32380	120750	91131	157540	112900	114990
ETNIESQPIVDTHSK	15	0	1696.83	F1NJ08;A0A1L1RXL9;P09654;Q49MC0	F1NJ08	419	433	yes	2;3;4	1.88e-48	190.11	18876000000	358870	474810	480240	228840	479540	432050	385450	225460	228640
AYTISAASVK	10	0	1009.54	A0A1D5PCL0;Q90985	A0A1D5PCL0	1996	2005	no	2	4.76e-08	190.02	219950000	35244	59241	102000	0	0	0	53561	83338	63701
LEVGTETIIDK	11	0	1216.66	P23228;A0A1L1RZ64;F1N9T0;A0A1D5P9U3	P23228	90	100	yes	2	3.29e-09	189.72	199880000	60501	62191	127630	54300	132430	55664	0	0	0
NATDIASQIK	10	0	1059.56	A0A3Q3A4C6;A0A1D5NY50;Q9DEH4	A0A3Q3A4C6	2393	2402	no	2;3	4.98e-08	189.72	15230000000	95877	260990	254810	156050	522200	466470	515920	406300	403850
LEDKDEGTYTFQLQDGK	17	1	1985.92	F1N9Z6;A0A1D5PSF9;Q90724	F1N9Z6	1214	1230	yes	3	6.86e-42	189.64	5468600000	91370	244820	281690	45586	121020	144740	245860	251120	293820
VAESDISNAR	10	0	1060.51	Q90662;F1NJM8	Q90662	590	599	yes	2	5.23e-08	189.38	515840000	0	0	0	0	0	0	90570	56847	60586
VGEAFSLTGR	10	0	1035.53	Q07784	Q07784	177	186	yes	2	5.23e-08	189.38	8148400000	67477	151770	146200	84448	229970	169250	105730	82138	83404
AEDTGTYYCAR	11	0	1305.53	A0A3Q2U9E1;A0A3Q2UAW0	A0A3Q2U9E1	88	98	no	2	2.01e-11	189.38	797850000	219600	52298	53440	67131	36672	45319	72063	47654	69212
LEQSEAQLGR	10	0	1129.57	A0A1D5NTG0;Q5ZLC3	A0A1D5NTG0	276	285	yes	2	5.23e-08	189.38	1349800000	61477	70622	74269	35937	65699	54847	148740	102380	112330
LGDVISIQPCPDVK	14	0	1539.8	Q5ZMU9;A0A182C6H1;A0A1D5P448;A0A1D5NTY5;A0A182C5X0;A0A1D5PXG2;A0A1D5PF52	Q5ZMU9	96	109	yes	2;3	8.11e-24	189.33	2382100000	188310	428170	448620	23119	45875	45400	223430	189520	183800
GEMLDLQHGSLFLK	14	0	1586.81	P00340;E1BTT8	P00340	60	73	yes	2;3	8.92e-22	189.33	1759000000	224810	142180	132540	63806	36496	45895	26771	70858	59047
DTDSEEEIREAFR	13	1	1595.71	R4GJW8;P62149;A0A1D5P2H5;A0A3Q3AZM2;F2Z4K8;O93410;P05419	R4GJW8	79	91	yes	3	5.36e-23	189.3	2430000000	29617	22666	13225	17359	32331	17689	78603	51478	44723
SPFPVTVAPPLQLDK	15	0	1607.89	Q90WF0	Q90WF0	944	958	yes	2;3	3.03e-26	189.3	7742300000	91033	170660	175110	33375	71154	70855	431550	341150	333520
AVTEQGAELSNEER	14	0	1531.71	A0A1D5PIL5;Q5ZMD1;Q5ZM05	A0A1D5PIL5	28	41	yes	2;3	8.15e-24	189.3	2791700000	47108	40055	43453	30385	44625	42100	58686	35246	46531
EAMTAYNSHEEGR	13	0	1493.62	F1NX83;A0A1D5PF87	F1NX83	578	590	yes	2;3	1.45e-31	189.24	40201000000	261040	249300	256900	231390	302440	232400	330500	239010	270820
LDEAEQLALK	10	0	1128.6	A0A1D5P525;Q9DGM4;A0A3Q2UHY4;A0A1D5P603;A0A1D5PUR6;A0A1D5NVW6;A0A1D5NYC2;A0A1D5P600;Q90WH5;F1P3X1;P02565;P13538;Q910C5;Q9DGM5;R4GIG1;P79792;Q91411	P13538	1800	1809	no	2;3	2.31e-34	189.18	1303500000000	5252600	10836000	11033000	4928500	15000000	10625000	11443000	8377900	8841000
ELLLPVTVK	9	0	1010.64	A0A3Q2TS15	A0A3Q2TS15	5896	5904	yes	2;3	0.00034589	189.13	18242000000	103810	183260	186750	0	0	0	158220	124950	127930
QNYLAEHCPPLSLPGSMQELQELCK	25	0	2941.38	P68246;E1BUD3	P68246	42	66	yes	3;4;5	3.27e-97	189.09	59517000000	273370	629390	635960	412870	607260	1001900	496680	721060	637060
TQCHLPVDMLSIQSAK	16	0	1826.9	A0A3Q3A4C6;A0A1D5NY50;Q9DEH4	A0A3Q3A4C6	408	423	no	2;3;4	5.56e-41	189.09	9505700000	117740	274610	303070	58622	125610	133080	317340	282760	298180
GDLGIEIPAEK	11	0	1140.6	A0A1D5P9V0;P00548;F1NW43	A0A1D5P9V0	314	324	no	2;3	3.08e-37	188.99	730190000000	4311000	5201900	5413000	2560000	5107800	4137000	5922000	4215400	4604100
AGQPIVSSR	9	0	913.498	P79757	P79757	364	372	yes	2	4.21e-06	188.98	26882000000	135130	137160	132370	137320	232940	152330	476010	299690	336900
SQWSPALTISK	11	0	1216.65	Q5ZL59;A0A1D5PLI5	Q5ZL59	91	101	no	2;3	2.12e-11	188.96	1517900000	68594	140130	157790	83408	190020	174360	214840	191090	168420
DPLNETVVGLYQK	13	0	1474.77	A0A1D5P603;A0A1D5P600;A0A1D5PFB7;A0A1D5NXZ4;P02565;Q910C5;R4GIG1	A0A1D5P603	602	614	no	2;3	1.22e-22	188.96	3021900000	26703	42245	50820	44448	102240	56897	247380	111450	90607
AAAEVNQDYGLDPK	14	0	1489.7	Q5ZLD1	Q5ZLD1	99	112	yes	2;3	1.38e-20	188.91	1281100000	46462	68660	84469	28646	83578	56558	97420	56086	60397
EFQDLGAQVTDSPADVAER	19	0	2046.95	A0A1D5PQ96;Q5ZLI9;A0A1D5PH80	A0A1D5PQ96	42	60	yes	2;3	2.44e-53	188.9	1406800000	39728	51200	57619	29649	62834	57131	27777	20865	24981
FEELNMDLFR	10	0	1312.61	Q90593;A0A1D5PG73	Q90593	325	334	yes	2	5.6e-08	188.87	363010000	23822	22763	25599	0	0	0	58645	91324	76380
GEDPVDYDGGR	11	0	1178.48	F1NK96	F1NK96	252	262	yes	2	2.15e-11	188.87	2708400000	23423	22424	24817	24815	42846	31815	43078	35581	33626
DFTPSGIVGAFR	12	0	1265.64	A0A1D5P1J7	A0A1D5P1J7	29	40	yes	2	1.73e-13	188.87	257050000	0	0	0	62945	94861	134400	0	0	0
NIFDFNALK	9	0	1080.56	F1NN63;Q2UZR2	F1NN63	201	209	yes	2;3	4.39e-06	188.66	5092900000	55088	112770	526270	38625	21610	561420	38765	266280	111420
LECQVDEDR	9	0	1162.49	A0A3Q3A948	A0A3Q3A948	138	146	yes	2	4.39e-06	188.66	19966000000	71966	181490	180270	92409	199090	164740	143290	104220	141280
NNLLLAEVEELR	12	0	1411.77	A0A1D5NZY9;P79792;Q8UWA0;P79793	A0A1D5NZY9	1686	1697	no	2;3	3.57e-16	188.6	1542500000	0	0	0	35255	227110	58679	107040	91533	88330
IPSAVGYQPTLATDMGTMQER	21	0	2265.08	Q5ZLC5;A0A1L1RY04	Q5ZLC5	330	350	yes	2;3	7.71e-37	188.58	13078000000	116620	158920	160490	45013	79293	74445	214590	194980	192740
CDVSDGEWAICTPPTGIK	18	0	2004.89	A0A3Q2TS15	A0A3Q2TS15	2313	2330	yes	2;3;4	9.44e-53	188.48	11797000000	159140	347220	335180	129750	268580	244800	447960	470280	408060
DNMEQSCCSFECHPPR	16	0	2052.75	P20785;A0A1D5PWN6	P20785	239	254	yes	3	1.54e-41	188.47	1634400000	25122	29091	34628	14235	14777	18343	47500	31189	37926
YASICQQNGIVPIVEPEILPDGDHDLK	27	0	3019.5	R4GM10	R4GM10	174	200	yes	2;3;4;5	6.82e-77	188.41	127910000000	437110	871360	753230	164130	304600	462480	377690	525910	467680
GNDMQVGTYVEK	12	0	1339.61	Q5ZJ57;F1NXN8	Q5ZJ57	202	213	yes	2	3.71e-16	188.29	152960000	0	0	0	11555	23948	22600	49734	26193	35227
TVPQSNLPPTAQQGGLK	17	0	1734.93	A0A1D5P061;A0A1D5PVZ4;E1BQZ7	A0A1D5P061	642	658	yes	2;3	1.79e-41	188.29	1322500000	85603	170050	174290	21819	69314	53754	242220	196820	160410
NCEDMDECNIR	11	0	1454.52	F1NII7;Q9DDR6	F1NII7	568	578	yes	2;3	2.31e-11	188.28	2519000000	7816.4	21698	20882	9044.4	29340	27562	47411	34774	40556
WAVIGDENYGEGSSR	15	0	1638.73	Q8AYI3;Q5ZMW1	Q8AYI3	659	673	yes	2	3.24e-31	188.26	1063800000	137530	214980	239050	19748	32755	36079	88124	84348	91727
EVVLDNVDPNILDMIVK	17	0	1925.02	A0A1D5P0B5	A0A1D5P0B5	73	89	yes	2;3	9.42e-33	188.25	885740000	116390	251000	231030	73210	122800	171900	28000	31699	32131
LGDTVEMEMATMLEQCPSVVR	21	0	2395.09	Q9DEA4;H9KZU7	Q9DEA4	288	308	yes	2;3	4.33e-67	188.1	3780200000	90042	142910	115060	25595	45908	47204	155610	191840	188530
GMGTDEETILK	11	0	1192.56	P17153	P17153	30	40	yes	2	4.35e-09	188.04	1929400000	254230	297700	319970	128580	258190	219730	213370	125930	116490
NNMIIIQGDK	10	0	1144.59	A6BM71;A6BLM5	A6BM71	7184	7193	yes	2;3	6.78e-06	188.04	6150100000	88925	265180	228260	19879	64738	57221	599430	475570	453830
GHQESDCPAR	10	0	1155.47	Q5F4B1;F1NAX3	Q5F4B1	282	291	yes	2;3	1.57e-12	187.99	2357700000	11068	6189.6	7239.4	13540	16496	12955	28169	31628	35345
TTVGVDGSLYK	11	0	1138.59	F1NZJ2;Q5F3F7;Q8AYP8	Q8AYP8	408	418	no	2	2.26e-15	187.97	844410000	47204	95837	93776	25172	79052	58275	59627	38575	39762
YLAEFATGNDR	11	0	1255.58	Q5ZMT0;F1P2P9	Q5ZMT0	131	141	yes	2;3	2.4e-11	187.97	8365200000	265400	343250	366360	342650	488260	573800	385660	383790	366280
DVEIDPDGTFK	11	0	1234.57	A0A3Q3AHU9	A0A3Q3AHU9	6	16	yes	2;3	2.4e-11	187.97	17566000000	350970	677870	784950	253700	727370	675210	565180	397720	447820
SPSQPTEAAHAGAEAAGSEAAAGAEASK	28	0	2523.15	F1NZ04;Q5ZLU2	F1NZ04	302	329	yes	3;4	9.49e-109	187.92	20204000000	138510	244090	282680	187990	631610	467440	320240	188460	222030
SASVATQQTTVSSVPSHPSTAGK	23	0	2227.11	Q9DEH4;A0A3Q2U8G4	Q9DEH4	2324	2346	yes	3;4	6e-82	187.86	2959000000	32385	38190	43445	59004	76852	76559	107270	66836	84877
AQSSWGSGDSLR	12	0	1249.57	P13648	P13648	517	528	yes	2	3.91e-16	187.85	835960000	46930	50977	55428	28934	49498	43950	88679	58371	58547
DSTLIMQLLR	10	0	1188.65	Q5ZKC9;A0A1L1RSI2;A0A1L1RRT9;A0A1L1S0W4;R4GF89;A0A1D5PIL5;Q5ZMD1;Q5F3W6;F1NMY1;Q5ZMT0;F1P2P9;Q5ZKJ2;Q5ZLQ6	Q5F3W6	218	227	no	2	6.37e-08	187.82	2491300000	32857	78773	83181	41836	58962	72142	112410	138350	133010
DTIVVNAGDTFR	12	0	1306.65	A0A3Q2TS15	A0A3Q2TS15	3069	3080	yes	2;3	5.32e-33	187.76	4287500000	102140	186450	199360	87664	202700	193270	243020	215580	218310
ATLSDDR	7	0	776.366	F1NNW0;Q02173;A0A1D5PKV3	F1NNW0	1188	1194	yes	2	2.2e-05	187.63	70426000000	209730	226710	242350	144060	229840	179120	209250	145500	168610
AAGDDESAGLIEQINVLK	18	0	1841.94	Q5ZLC7;A0A1I7Q3Z7	Q5ZLC7	177	194	yes	2;3	3.74e-48	187.57	939460000	24474	49235	52268	52257	100660	106110	131290	110370	119260
DASGDAYSEFMK	12	0	1319.53	Q8JG64	Q8JG64	160	171	yes	2;3	1.02e-13	187.42	2529400000	121460	213360	263300	100340	256550	200670	224450	171410	181790
GVEEGASLLLDGR	13	0	1314.68	E1C155	E1C155	345	357	yes	2;3	2.87e-20	187.42	1566600000	153630	175290	195260	91395	103380	107930	74443	66419	65547
LYSCGEAPDYDK	12	0	1416.59	A0A1D5P470	A0A1D5P470	31	42	yes	2;3	4.11e-16	187.42	4846300000	180950	385160	437210	151180	469520	396140	332880	244420	273050
TQNKPEDETEDWGR	14	1	1703.74	A0A1D5P909	A0A1D5P909	205	218	yes	2;3	4.74e-24	187.37	82449000000	283880	1004300	1043600	269160	934210	955760	782330	665320	657780
AINDNTNSR	9	0	1003.47	A0A3Q2U769	A0A3Q2U769	167	175	no	2	5.19e-06	187.22	1406500000	107340	79517	79155	48369	74470	73898	82968	47238	49375
VFSENACGMSETAAVAAGVAHIK	23	0	2319.1	Q05623;E1C597	Q05623	404	426	yes	2;3	6.47e-82	187.19	6918100000	67581	117110	126260	29047	40120	40368	95596	117650	104180
AASSATLYVEAR	12	0	1237.63	A6BM71;Q98918	A6BM71	2772	2783	yes	2	4.22e-16	187.16	3650700000	234970	242170	231070	156780	257590	220680	234320	165200	181610
TASNVEEAFINTAK	14	0	1493.74	A0A452J7V2;Q90965	A0A452J7V2	152	165	yes	2;3	1.31e-20	187.11	684730000	52128	103650	104280	0	0	0	140380	124080	120650
GQDTSASNGELLLR	14	0	1459.73	A0A1D5Q008	A0A1D5Q008	227	240	yes	2	1.06e-23	187.11	952680000	88056	52868	34595	70475	64756	65023	112120	99493	106530
ALQEMLTNTGDNASEGAAQGGHR	23	0	2327.06	A0A1D5PCL0;Q90985	A0A1D5PCL0	68	90	no	3	6.55e-82	187.07	1443800000	40423	26486	33880	65146	55279	58266	120070	92471	115040
LKGEPLTESPDCEIKEEGK	19	2	2158.05	A6BM71;A6BLM5	A6BM71	6378	6396	yes	3;4;5	4.13e-53	187.06	3971400000	72547	184250	211610	61193	268520	292850	141330	148170	137280
HVLATLGEK	9	0	966.55	P02604;P02605;F1NZG0	P02604	152	160	no	2;3;4	5.31e-06	187	114300000000	818250	1585500	1733400	518500	1114800	1150700	1272100	1325500	1284200
EEVSVEVPK	9	0	1014.52	A6BM71;A6BLM5;A6BM73;A6BLM6;A6BLM8;A6BLM7	A6BM71	5145	5153	no	2;3	5.31e-06	187	45913000000	483140	796480	806270	319720	751600	626260	855710	644510	678780
VADQISDVVYK	11	0	1235.64	A0A3Q3A4C6;A0A1D5NY50;Q9DEG5;Q9DEH4	A0A3Q3A4C6	1188	1198	no	2;3	4.36e-09	186.87	5660000000	172070	361610	384850	127860	262600	291390	174120	154040	164940
ANLTPDSCPETK	12	0	1331.6	Q07784	Q07784	507	518	yes	2;3	4.38e-16	186.81	20828000000	136980	249960	247340	135960	358870	267760	327490	222580	241550
TLMNLGSLAVAK	12	0	1216.68	A0A1D5PDK5	A0A1D5PDK5	128	139	yes	2;3	4.38e-16	186.81	179950000	37892	68744	94957	0	0	0	21778	21917	19116
CEVGTTHWTQCNETPVK	17	0	2045.89	F1N9Z6;A0A1D5PSF9;Q90724	F1N9Z6	551	567	yes	2;3;4	5.42e-42	186.77	3689700000	147500	232880	291740	45496	83249	85982	244910	167520	225970
CATITPDEAR	10	0	1132.52	Q5ZL82;A0A1D5P8I7	Q5ZL82	113	122	yes	2	8.54e-13	186.76	4228900000	17264	26366	27369	40596	129010	98604	289940	173040	173410
EGNGTVMGAELR	12	0	1232.58	P02604;P02605;F1NZG0;F1P5V6;P02606	P02604	140	151	no	2;3	4.73e-19	186.74	281460000000	888820	1159000	664150	402220	972340	972030	989540	982470	951840
FGGVQELLDQQK	12	0	1360.7	Q5ZHP2	Q5ZHP2	89	100	yes	2;3	8.43e-14	186.72	938520000	28594	63718	73976	13065	35958	49676	77841	103090	95796
TVILDAFASPSEEVK	15	0	1604.83	A0A1D5P2A5;E1BVC2	A0A1D5P2A5	841	855	yes	2	3.7e-57	186.58	41354000	0	0	0	0	0	0	14524	12650	12026
VSGSPTATISWEK	13	0	1361.68	A0A1L1RJ69;A0A3Q2UIW4;A0A3Q2TRR9;A0A3Q2UCG1;A0A1D5P806;A0A1D5PF99;Q6KDZ1	Q6KDZ1	1976	1988	no	2	9.51e-25	186.46	112070000	0	0	0	0	0	0	33481	28423	24611
EYLPIAGLADFTR	13	0	1464.76	F1P180;A0A1L1RPR4;P00508	F1P180	88	100	yes	2	1.62e-22	186.46	1821500000	75995	93217	100300	73432	81953	135390	32494	46868	43714
AASFQTVSQLHK	12	0	1315.69	A0A1D5NZY9;Q8UWA0	A0A1D5NZY9	649	660	no	2;3	9.74e-14	186.46	1121400000	0	0	0	0	0	0	28343	22849	18859
EADIDGDGQVNYEEFVQMMTAK	22	0	2489.07	R4GJW8;P62149;A0A1D5P2H5;A0A3Q3AZM2	R4GJW8	128	149	yes	2;3	2.11e-74	186.43	3437900000	110920	188100	183880	77380	118230	141090	180050	204220	176520
AALEQTER	8	0	916.461	A0A1D5P525;Q9DGM4;A0A3Q2UHY4;A0A1D5P603;A0A1D5PUR6;A0A1D5NVW6;F1P3X1;P02565;Q9DGM5;R4GIG1	A0A1D5PUR6	1694	1701	no	2	3.3e-05	186.3	370360000000	504180	1164700	635600	459450	931390	1419500	1376300	353340	322690
EDAANNYAR	9	0	1022.44	A0A1D5NW27;P02552;A0A1D5P198;A0A3Q2U7S4;A0A1D5NXV1;A0A1D5P5Z0;A0A1D5PA34;A0A1D5PAR5;F1P5B0;A0A1L1RJP8;F1NW97;F1NMP5;F1NMP3;P08070;F1NWX0	A0A1D5NW27	97	105	no	2	5.7e-06	186.3	26841000000	146630	195280	187380	121280	288940	222960	269860	185120	180800
QLNQGGR	7	0	771.399	A6BM71;Q08476	A6BM71	4465	4471	yes	2	1.75e-05	186.29	44455000000	145250	189630	184490	88369	182050	155820	160100	112170	112370
STTTGHLIYK	10	0	1119.59	Q90835;Q5ZKM2;A0A1L1RRR1;A0A1I7Q425;A0A1L1RVL2;Q6PTX1;F1N9H4	F1N9H4	21	30	no	2	7.51e-08	186.25	425000000	0	0	0	43331	33017	45580	57867	33623	50452
ADLPQEMYNCLR	12	0	1508.68	P51890	P51890	324	335	yes	2;3	4.64e-16	186.24	1458600000	86979	98405	110310	33669	59530	58339	252960	156630	126420
SDIGEVILVGGMTR	14	0	1445.75	F1NZ86;Q5ZM98	F1NZ86	380	393	yes	2;3	1.17e-23	186.17	597330000	24479	34902	36264	0	0	0	0	0	0
GAGTDDDTLIR	11	0	1132.54	P17153;A0A1D5PQU4	P17153	261	271	yes	2	2.91e-11	186.16	1433900000	14386	12659	13191	33438	55721	45178	52734	31744	28351
AYLNASDLR	9	0	1021.52	A0A3Q3A4C6;A0A1D5NY50;Q9DEH4	A0A3Q3A4C6	1611	1619	no	2	5.78e-06	186.16	15283000000	162530	265660	278310	156350	331360	257280	335430	263490	273740
SLSTELFK	8	0	923.496	A0A1D5P525;Q9DGM4;A0A1D5P603;A0A1D5PUR6;A0A1D5NVW6;A0A1D5NYC2;A0A1D5P600;Q90WH5;A0A1D5PFB7;A0A1D5NXZ4;F1P3X1;P02565;P13538;Q910C5;Q9DGM5;R4GIG1;A0A1D5NZY9;F1NM49;Q9IBD4;P29616;Q8UWA0;P79793;Q91411	P13538	1479	1486	no	1;2;3	0.0014611	186.13	244680000000	1485400	3400800	3509600	901690	2186400	2096600	3106700	3200500	3142900
VHWTAEEK	8	0	998.482	P02112;Q90864;Q90750;Q90735	P02112	2	9	yes	2;3	3.35e-05	186.13	20176000000	402530	433120	536030	296810	238560	361230	421360	356330	454780
AVTEQVQQAAAR	12	0	1270.66	E1C516	E1C516	13	24	yes	2	8.68e-14	185.96	828000000	45569	62433	69842	35339	73509	56784	97310	70893	77020
KAITDAAMMAEELK	14	1	1520.76	A0A1D5P525;Q9DGM4;A0A3Q2UHY4;A0A1D5P603;A0A1D5PUR6;A0A1D5NVW6;A0A1D5NYC2;A0A1D5P600;Q90WH5;F1P3X1;P02565;P13538;Q910C5;Q9DGM5;R4GIG1;A0A1D5NZY9;F1NM49;Q9IBD4;P29616;P79792;Q8UWA0;P79793;Q91411	P13538	1760	1773	no	2;3	4.48e-40	185.87	161060000000	155870	337580	336480	75847	178710	203310	361360	369630	344020
FGPPGPPGKPEVTNVTK	17	1	1720.91	A0A3Q2TS15	A0A3Q2TS15	5	21	yes	2;3	1.46e-54	185.87	0	0	0	0	0	0	0	0	0	0
GLNDMDLDASSMEK	14	0	1524.64	A0A1D5PCL0;Q90985	A0A1D5PCL0	2795	2808	no	2;3	1.2e-23	185.87	777040000	60599	78670	83945	72967	151250	120120	13786	12965	12059
QSNNESNLR	9	0	1060.49	Q5ZJ70;A0A1D5PLK6	Q5ZJ70	645	653	yes	2	5.97e-06	185.81	677210000	23512	37683	34718	11725	24180	26468	26171	26678	23755
VELQELNDR	9	0	1114.56	E1BZ05;P02542;O73665;F1NJ08;A0A1L1RXL9;P09654;Q49MC1	E1BZ05	102	110	no	2;3	5.97e-06	185.81	36049000000	180600	237740	259200	115730	211610	227030	220250	148080	149020
DGHEIQSSDR	10	0	1142.5	A6BM71;Q98918;Q9YH41	A6BM71	2118	2127	no	2;3	7.83e-08	185.81	27835000000	70397	83064	76794	69810	86917	95447	146050	112900	123720
AILAESELQR	10	0	1128.61	F1NNW0;Q02173;A0A1D5PKV3	F1NNW0	1100	1109	yes	2;3	2.02e-08	185.72	98459000000	859310	838330	900770	781040	930770	805710	1071000	851790	917990
NCMDIDECQR	10	0	1339.5	F1NII7;P87363	F1NII7	1108	1117	yes	2	7.98e-08	185.61	2227800000	46837	94033	98035	46817	129260	90184	103780	74799	70911
LTPEEEEILNK	11	0	1313.67	F1NB02;A0A1D5PT58;Q6EE57	F1NB02	128	138	yes	2;3	3.06e-11	185.61	5626100000	201040	349390	368140	98148	267380	209620	304560	222880	240650
NFGDDMDDER	10	0	1212.44	E1C903	E1C903	197	206	yes	2	7.98e-08	185.61	893650000	30892	42926	44369	19091	35647	32156	73283	51727	54781
GCDVVVIPAGVPR	13	0	1337.71	E1BVT3	E1BVT3	91	103	yes	2;3	1.76e-22	185.61	6473600000	212210	143830	182430	47898	99497	92591	64588	57913	65249
NVQLTENEIR	10	0	1214.63	A0A1D5P888	A0A1D5P888	44	53	yes	2	7.34e-06	185.61	2861300000	28288	54150	62573	32412	107380	81649	73553	53595	55473
VGAEVYHSLK	10	0	1101.58	P07322	P07322	184	193	yes	2;3	3.52e-12	185.6	138930000000	467690	782030	895780	250620	431520	475200	1010600	880990	956420
CVAALSSACPK	11	0	1162.55	A0A1D5P2A5;E1BVC2	A0A1D5P2A5	783	793	yes	2;3	3.07e-11	185.6	481390000	19979	43439	48702	38640	107840	99505	185310	148710	143780
DALNQALDEELER	13	0	1514.72	A0A1D5P1U2	A0A1D5P1U2	37	49	yes	2	4.99e-20	185.59	290820000	10945	16533	18951	16906	30599	40195	21135	15777	21812
AVFPSIVGRPR	11	1	1197.7	P08023;F1P476;P63270;A0A3Q3AWV3;A0A1D5NV17;A0A3Q3A5C8;P60706;P53478;B5M200;Q90736;P68034;A0A1L1RU07;P68139;A0A1L1RPH2;Q5ZMQ2;A0A1D5P5D1;Q5ZLX9	P68139	31	41	no	2;3	2.11e-21	185.29	6892900000	83037	179270	108080	41373	32223	22263	151840	206390	182130
ILHAANDLFYEEQK	14	0	1689.84	A0A1D5P061;A0A1D5PVZ4;E1BQZ7	A0A1D5P061	1126	1139	yes	2;3	1.27e-23	185.27	2570800000	56572	108040	102300	27940	70179	76820	201980	269470	251170
DEMAATEQDKTPLQQK	16	1	1831.86	P13585	P13585	237	252	yes	2;3;4	3.87e-41	185.26	10407000000	131970	276360	257910	199910	486960	372280	516010	352320	401380
YLEENMTQSALPK	13	0	1522.73	Q5ZM25;A0A452J806	Q5ZM25	282	294	yes	2	5.21e-20	185.25	452350000	22123	36326	43865	14816	33872	25023	120470	100960	102450
IAGHAEEYGAETLER	15	0	1644.77	P01994	P01994	18	32	yes	2;3	2.66e-57	185.25	59309000000	253500	368920	397800	305460	571870	548540	536040	440960	495040
ASGQCLDIDECR	12	0	1422.59	E1C1G8	E1C1G8	36	47	yes	2	5.08e-16	185.25	113830000	0	0	0	0	0	0	18053	12264	10009
YQIDPDASFSAK	12	0	1340.62	E1BYN7;A0A1D5NTT4	E1BYN7	225	236	yes	2;3	5.08e-16	185.25	3386600000	180840	288050	296740	149150	325390	238530	261620	205290	206150
DGLPAGAGVGGAGLAGAGGVGSPYGK	26	0	2112.06	A0A1D5PUM7;E1C7I7	A0A1D5PUM7	608	633	no	2;3	6.05e-37	185.25	3864700000	84375	231730	214680	51336	149420	134970	197060	257490	208070
DTQLITVDEK	10	0	1160.59	Q5ZJL0;A0A1L1RM23	Q5ZJL0	39	48	yes	2	6.55e-06	185.18	524360000	15158	19473	24160	25774	43596	40530	154340	108670	131610
WEICGEPVIETK	12	0	1459.7	A6BM71;A6BLM5	A6BM71	7871	7882	yes	2	1.12e-13	185.18	787860000	58799	143720	148090	32152	67482	73973	170250	129990	141620
SDPNQHLQIVQDPDYR	16	0	1923.91	F1NX83;A0A1D5PF87	F1NX83	326	341	yes	3	1.21e-51	185.14	16142000000	222930	234170	265500	132790	248530	187590	377910	268980	363040
IVQQLDVGPNK	11	0	1209.67	A0A3Q2UD12;P15989;F1P2F0;A0A1D5PGD5;A0A3Q3AR07;A0A3Q2UMJ2;A0A3Q2U4U7	A0A3Q2UD12	1261	1271	yes	2;3	3.35e-11	185.14	1454900000	185860	262910	323430	54420	101660	122940	191580	191350	171860
AISEELDNALNDITSL	16	0	1716.84	P19352	P19352	269	284	no	2;3	5.31e-39	185.08	20373000000	104320	167610	162730	58767	78135	131240	145550	67763	96703
KAGTQIENIEEDFR	14	1	1648.81	P05094;A0A1D5PF13;A0A1D5P9P3;A0A1D5P522;Q5ZIW4;A0A1D5PBQ2;Q5ZJN7;R9PXQ0;P20111;A0A1L1S0L2;A0A1D5PNV5	R9PXQ0	57	70	no	2;3	1.07e-23	184.99	60637000000	342850	417900	534610	186260	250630	387900	250410	359560	318260
TDEFQLHTNVNDGTEFGGSIYQK	23	0	2599.18	E1BYN7;A0A1D5NTT4	E1BYN7	175	197	yes	3	6.57e-76	184.95	702670000	16251	25955	26200	19386	24143	25965	43377	45347	46939
LTFSCLGGSDNFK	13	0	1444.67	A0A3Q2UD90;Q90955;A0A1D5PZE1;A0A3Q2UCS1;A0A3Q2U4I4;A0A3Q2U7H6;A0A3Q2TW82;A0A3Q2UEJ5	A0A3Q2UD90	36	48	yes	2	6.44e-22	184.88	177380000	28914	53963	59269	0	0	0	54620	51774	47952
VLIAAHGNSLR	11	0	1149.66	Q5ZLN1;F1NHM9	Q5ZLN1	181	191	yes	2;3	8.72e-11	184.87	3371200000	52394	63404	70485	68848	103590	99305	84961	80012	74996
TQVELLEPPQPALR	14	0	1589.88	A0A3Q2U5M9;A0A3Q2UIK1	A0A3Q2U5M9	200	213	yes	2;3	3.3e-27	184.87	4031300000	157380	231600	230290	90497	188900	162670	355380	263680	278780
VGEQSHDADPGLVTAYGAGLQGGVTGVR	28	0	2710.33	Q90WF0	Q90WF0	2430	2457	yes	3	2.38e-93	184.66	2970100000	26748	48442	51063	29042	55440	47445	77704	61560	61771
AINQGGLTSVAVR	13	0	1284.71	F1NEQ6	F1NEQ6	31	43	yes	2	1.45e-20	184.58	249430000	11964	19172	23406	11787	25336	19840	0	0	0
FSTVAGESGSADTVR	15	0	1482.7	A0A1D5PPU9;A0A1L1RX38;Q5ZMM4;Q5ZL24	A0A1D5PPU9	113	127	yes	2;3	5.14e-26	184.55	3853800000	104990	103490	203540	103120	224530	111480	35855	19080	81564
EQTDFQHR	8	0	1059.47	A0A1D5PUQ7;Q90YA3	Q90YA3	716	723	no	2;3	6.85e-07	184.49	75248000000	140470	106340	109430	258850	393260	339940	222100	173850	190890
EVANEGDALVAGGVSQTPSYLSCK	24	0	2451.16	E1BSH9	E1BSH9	111	134	yes	2;3;4	7.34e-85	184.34	6901000000	130510	158270	166300	59509	124760	104580	118490	108610	97971
TTWSNPPSQGAR	12	0	1300.62	P00504;F1NTM7	P00504	293	304	yes	2	4.1e-15	184.27	1042500000	14242	29522	29615	19327	65217	47423	58243	36574	44662
GSTPYGGVNLEDLIVK	16	0	1660.87	E1C0Q5	E1C0Q5	160	175	yes	2;3	8.66e-40	184.21	434520000	30091	45635	44986	10113	25943	21965	112490	89612	87020
TGVGGAGVAGAGPLGSPYGK	20	0	1671.86	A0A1D5PUM7;E1C7I7	A0A1D5PUM7	534	553	no	2;3	8.13e-65	184.21	521120000	17280	28628	52849	1306	6384.4	4567	71738	38673	107280
AAEAAAALADADADLEER	18	0	1771.82	A0A1D5PCX2;Q5ZHN1	A0A1D5PCX2	196	213	yes	2;3	5.47e-37	184.21	251120000	6938.2	7386.7	8447.9	3665.3	6819.4	8502.5	9810.6	8214.5	8508.2
VAEVAPPISYGDFDKEYEK	19	1	2156.03	A6BM71;Q98918;Q788U5;Q9IAR9	A6BM71	947	965	no	2;3;4;5	1.87e-52	184.15	19913000000	232670	807850	822950	103530	280510	318180	981720	867590	931990
VESEVGGVQGTGDSLGTR	18	0	1746.84	R4GI80	R4GI80	237	254	yes	2;3	1.67e-51	184.02	2224000000	54523	74792	84904	44980	87490	71077	110430	80226	98842
SGGGYIVVDPILR	13	0	1344.74	F1NX83;A0A1D5PF87	F1NX83	102	114	yes	2;3	5.21e-20	183.99	4316400000	64918	155340	124490	50415	91783	88891	64123	77396	68278
NAYEESLDHLETLKR	15	1	1816.9	A0A1D5P525;A0A1D5P603;A0A1D5PUR6;A0A1D5NVW6;A0A1D5NYC2;F1P3X1;P02565;P13538;Q9DGM5;R4GIG1	P13538	1489	1503	no	2;3;4;5	1.02e-29	183.96	94395000000	334520	688550	724320	280700	464050	593640	470850	791170	725800
EAYMGNVLQAGQGQAPAR	18	0	1859.89	E1C0Q5	E1C0Q5	82	99	yes	2;3	4.47e-30	183.89	570910000	18518	21816	23352	78797	89567	90622	211040	225900	213890
ITIETTPNHSTVTITDSK	18	0	1957	A6BM71;A6BLM5	A6BM71	7974	7991	yes	3	5.39e-70	183.84	669970000	642730	207100	386310	48741	30133	34935	50702	32668	61583
NLAPYSDELR	10	0	1176.58	P08250	P08250	185	194	yes	2	6.32e-34	183.81	17862000000	153320	377800	319370	71811	179590	243000	252680	250900	244470
VDLGTIGK	8	0	801.46	F1NN63;Q2UZR2	F1NN63	165	172	yes	2;3	0.00027851	183.74	82624000000	314680	464730	545600	117360	315990	248830	387930	311230	298400
FEYISDGR	8	0	985.451	A6BM71;A6BLM5	A6BM71	6745	6752	yes	2	0.00027851	183.74	16903000000	216650	359810	386540	155980	297630	309540	193120	167250	174930
SVEDDPNTAR	10	0	1102.49	A0A3Q3A4C6;A0A1D5NY50;Q9DEG5;Q9DEH4	A0A3Q3A4C6	1109	1118	no	2	7.45e-07	183.72	11307000000	66413	79462	93731	50027	102470	74593	126180	81965	102420
SDWVAVGETPR	11	0	1215.59	A0A1D5PUM7;E1C7I7	A0A1D5PUM7	1801	1811	no	2;3	6.72e-09	183.72	5922200000	194670	305940	351000	100640	225430	191610	218670	242720	269470
YVGSMVADVHR	11	0	1232.6	A0A1D5PN46	A0A1D5PN46	246	256	yes	2;3	3.23e-10	183.72	7408300000	100310	176510	154020	59122	91171	141460	188200	185750	198900
GHYTEGAELVDSVLDVVR	18	0	1957.97	F1NYB1;P09206;P09653;P32882;P09203;G1K338;P09244	F1NYB1	104	121	no	2;3	5.41e-52	183.7	1689200000	35895	39931	39635	39325	37968	42937	31198	37479	40375
EGEEEWVKDTTGTALR	16	1	1819.86	A0A3Q2TS15	A0A3Q2TS15	150	165	yes	3	5.95e-40	183.7	7499200000	45653	83615	51354	42175	130540	66137	246460	202190	170110
ALDSTTVAAHESEIYCK	17	0	1893.88	F1NWZ2	F1NWZ2	43	59	yes	3	1.02e-40	183.6	433970000	18468	16033	24159	15735	22726	23246	15566	13044	15651
STLTDSLVCK	10	0	1122.56	Q90705;A0A1D5PS29	Q90705	33	42	yes	2	8.61e-07	183.47	4385600000	28059	72745	82537	60180	176860	148070	509720	411730	400280
CESEEQEDGGGCYNIPNWSSLK	22	0	2558.03	F1NX83;A0A1D5PF87	F1NX83	909	930	yes	2;3;4	1.19e-74	183.45	8222500000	100140	202970	197160	208020	330650	290800	361430	282090	291760
QLTDVSTQR	9	0	1046.54	A0A1D5NZY9;Q8UWA0;P79793	A0A1D5NZY9	1277	1285	no	2	5.68e-05	183.43	3576800000	0	0	0	120940	508610	203720	127170	63402	87582
TIIQNPTDQQK	11	0	1284.67	A0A1D5P7C6	A0A1D5P7C6	200	210	yes	2	4.73e-09	183.33	210130000	0	0	0	13556	34948	28507	66323	46642	46000
MSTITTITDGK	11	0	1166.59	A0A1D5NY74	A0A1D5NY74	10	20	yes	2	7.3e-09	183.22	1185300000	78104	159560	173520	19172	50966	36434	328200	178470	220910
FNVWDTAGQEK	11	0	1293.6	P42558;A0A1I7Q3Y7	P42558	61	71	yes	2;3	4.55e-10	183.08	1214800000	140930	283300	286380	68221	149940	149970	315060	271270	253300
FGISDHVDSQCVVVK	15	0	1688.82	A0A3Q2TS15	A0A3Q2TS15	6086	6100	yes	2;3	1.36e-29	183.08	3210300000	193720	265430	288160	83627	95175	108110	394570	392330	430000
TQTVHVDEGRK	11	1	1268.65	F1NNW0;Q02173;A0A1D5PKV3	F1NNW0	474	484	yes	2;4	2.89e-09	183.03	945440000	6318.3	12039	10922	20554	37006	36784	40679	42196	43641
DGQELQIGDR	10	0	1129.54	A6BM71;Q98918	A6BM71	2820	2829	yes	2;3	1.07e-06	183.03	41097000000	196030	246570	236720	221300	389850	289350	325060	232890	246160
DIEIIRPLYSVEVIETETAR	20	1	2345.25	A6BM71;A6BLM5	A6BM71	6343	6362	yes	3	8.14e-65	183.01	605550000	0	0	0	18026	20616	16822	49049	167160	153690
ADQSFVTLATNDSYVK	16	0	1757.85	Q5ZJQ0;A0A1D5PAA8	Q5ZJQ0	2	17	yes	2;3	1.58e-104	183	8968500000	261860	299680	322920	163180	300000	241210	297740	243590	239420
LLLEYTETPYQER	13	0	1653.83	P20136;A0A1D5P833	P20136	19	31	yes	2;3	3.88e-21	183	1110200000	76912	82716	90852	74064	96028	126550	90235	108590	125830
TTVEGIQATVK	11	0	1145.63	P12003;F1NYY0	P12003	656	666	yes	2	4.71e-10	183	418180000	28064	71526	62807	24116	91681	61557	65034	47818	45534
AAYVLDTPEMR	11	0	1264.61	Q9DEH4	Q9DEH4	2145	2155	yes	2;3	7.59e-09	182.98	22019000000	374600	478680	502470	328460	609770	492850	546590	468880	482810
YESLTDPSK	9	0	1038.49	A0A1D5PHC5;F1NC33;Q04619;P11501;A0A1D5PUL6;A0A1D5P5R0;A0A1L1RND0;Q5ZIC0;Q2XQE5;Q5ZKZ3;Q5ZMA5	P11501	60	68	no	2;3	7e-05	182.98	6702000000	137750	227000	243510	100860	264780	204300	479530	345280	317470
EGMNVVEAMER	11	0	1263.56	D0EKR3;A0A3Q3AT29	D0EKR3	134	144	yes	2;3	4.88e-10	182.92	15074000000	263910	353470	367000	156290	289630	235920	311570	231620	240470
VLDRPGPPEGPLK	13	1	1373.77	A0A3Q2TS15	A0A3Q2TS15	4234	4246	yes	2;3;4	6.35e-20	182.92	21489000000	157150	295930	315620	47954	106080	107350	214180	191110	192140
TDNPAECYANAQEQLNQHIK	20	0	2343.05	A0A1D5NW68;P19121	A0A1D5NW68	341	360	no	2;3;4	4.92e-65	182.82	34562000000	240960	489670	519690	146450	346080	392250	597960	479380	502770
LMTLSNEIK	9	0	1047.56	F1NNW0;Q02173;A0A1D5PKV3	F1NNW0	992	1000	yes	2;3	7.65e-05	182.76	17548000000	205160	431660	425560	80418	201470	182400	290210	240910	231550
FCPTVNLDK	9	0	1092.53	F1NBX4	F1NBX4	69	77	yes	2	7.65e-05	182.76	482620000	54012	80031	124930	0	0	0	81477	111780	93121
EVSFQPTGESDWK	13	0	1508.68	Q9W7P7;F1NJF0	Q9W7P7	133	145	yes	2;3	3.14e-19	182.71	835650000	40621	58658	66835	9636.6	24117	23016	110260	105910	105400
EQAEAEVASLNR	12	0	1315.64	Q5ZLJ7;A0A1D5P9B0;A0A1D5P2B9;A0A1D5PV56;A0A1L1RJZ6;A0A1L1RVU7	Q5ZLJ7	43	54	no	2;3	6.04e-21	182.71	810560000	16116	11332	15380	8232.9	10409	9521.2	4968.8	3402	4059.5
VLEEAEEAGNK	11	0	1187.57	A0A3Q2UAJ4;F1NI05	A0A3Q2UAJ4	1237	1247	yes	2;3	4.51e-12	182.71	3557500000	201270	284910	284990	114090	201730	160090	175990	127320	122330
LVQDLATSPK	10	0	1070.6	A0A1D5PCL0;Q90985	A0A1D5PCL0	3522	3531	no	2	1.22e-06	182.71	665430000	40099	69790	79032	29917	79904	59558	41287	39796	36683
LLEELEEGQK	10	0	1186.61	A0A1I7Q403;Q90879;Q5F3Z3;A0A1L1RZV0	Q5F3Z3	14	23	no	2;3	1.25e-06	182.65	6935700000	345960	613150	689320	187200	456060	370470	496140	376910	401780
DMDDEESWIK	10	0	1266.51	A0A1D5PVG1;A0A3Q2TVB7;A0A3Q2U3B7;F1NHT3;A0A1D5PQC3;A0A3Q2U5Z2;A0A3Q2U342;P07751	A0A1D5PVG1	1752	1761	yes	2	1.25e-06	182.65	317070000	13247	23523	24873	14870	35631	36013	66215	47361	43871
VAPPGLTQVPQVQK	14	0	1460.84	F1NSV6;P08251	F1NSV6	73	86	yes	2;3	2.04e-17	182.64	749780000	60771	134230	151810	5823.5	15512	15861	95966	73891	80652
ATAAEASSSVR	11	0	1048.51	P79757	P79757	269	279	yes	2	5.81e-10	182.46	41339000000	200670	223210	185790	462260	789750	576550	270350	189220	240370
VTFQLPAER	9	0	1059.57	A0A1D5NYC2;P13538	P13538	276	284	no	2;3	3.77e-11	182.4	233020000000	813000	1260300	1480500	301800	559490	459610	965240	1075200	1046600
TEELEEAK	8	0	947.445	A0A1D5P525;Q9DGM4;A0A1D5P603;A0A1D5PUR6;A0A1D5NVW6;A0A1D5NYC2;A0A1D5P600;Q90WH5;A0A1D5PFB7;A0A1D5NXZ4;F1P3X1;P02565;P13538;Q910C5;Q90767;Q9DGM5;R4GIG1;A0A1D5NZY9;Q8UWA0;P79793;Q91411	P13538	1386	1393	no	2;3	4.71e-07	182.39	1102800000000	3253900	8598400	8785800	2585600	11171000	7634500	11701000	8142100	8517400
MLGQNPTK	8	0	887.453	P02588	P02588	49	56	yes	2;3	0.0025828	182.39	33981000000	118510	294160	334510	74699	203980	192100	318810	295140	310050
ALDDDRPPR	9	1	1053.52	E1BSS3	E1BSS3	1036	1044	yes	3	6.35e-15	182.39	4339600000	51516	48222	57501	104290	128090	123040	40000	37239	37249
TTNLTSAQK	9	0	962.503	A0A1D5P2A5;E1BVC2	A0A1D5P2A5	829	837	yes	2	0.00042707	182.39	369450000	0	0	0	8752.2	31380	24452	192350	138100	150180
QPAVDGGNPILGYFIDR	17	0	1830.93	F1N9Z6;A0A1D5PSF9;Q90724	F1N9Z6	534	550	yes	2;3	2.66e-32	182.35	2029900000	143370	239910	237680	52198	59699	89598	152970	213190	192590
NYEPIEDDSRLDIDSK	16	1	1907.87	F1N9Z6;A0A1D5PSF9;Q90724	F1N9Z6	1080	1095	yes	2;3;4	4.86e-51	182.31	25498000000	136420	319320	331250	162950	592290	482050	345700	308260	298850
NAENAIEALK	10	0	1071.56	P13585;Q03669;A0A1L1RKB7	P13585	111	120	no	2;3	5.07e-06	182.28	211070000000	417970	1385000	1350100	312850	1111100	975580	1148100	919190	1013000
IEDMAMLTFLHEPAVLYNLK	20	0	2347.2	A0A1D5P600;A0A1D5PFB7;A0A1D5NXZ4;Q910C5	Q910C5	80	99	no	3;4	9.34e-65	182.18	3213200000	0	0	0	166160	204840	219880	132350	176420	173700
DLADELTLVDVVEDKLK	17	1	1914.02	P00340;E1BTT8	P00340	43	59	yes	3	6.73e-66	182.18	0	0	0	0	0	0	0	0	0	0
STLNEIYFGK	10	0	1170.59	P14315;A0A1D5P9M3;A0A452J864	P14315	226	235	yes	2;3	9.64e-06	182.16	2840800000	36552	106640	111690	40163	91887	106690	199740	193610	176790
VEQDMSYYFR	10	0	1336.58	A0A1D5PUM7;E1C7I7	A0A1D5PUM7	1821	1830	no	2	1.47e-06	182.16	4288300000	68067	108760	121190	116310	219060	224490	280700	390890	330510
NLEAVETLGSTSTICSDK	18	0	1923.91	A0A1D5PU80;P24797;P24798	P24797	355	372	no	2;3	5.35e-48	182.1	489580000	13800	28313	29959	23748	77780	67479	59004	52237	51667
VTGLIENHNYEYR	13	0	1606.77	A0A3Q2TS15	A0A3Q2TS15	2234	2246	yes	2;3	5.44e-21	182.1	12343000000	62600	111900	116550	54233	84076	107810	125380	148560	140890
SSAATEEK	8	0	821.377	P79757;A0A3Q2UNJ2	P79757	611	618	yes	2	0.00056362	182.09	9780600000	199530	290220	270760	142890	465310	353100	399970	248440	277670
IVLTNPVCTEVGEK	14	0	1557.81	Q5ZMS3;F1NPF0	Q5ZMS3	427	440	yes	2	3.81e-22	182.08	234600000	47726	100750	99061	5346.1	12041	9854.2	19395	14626	16635
DFLAGGVAAAISK	13	0	1218.66	A0A1D5PCU1;Q5ZLG7;Q5ZMJ6	Q5ZMJ6	11	23	no	2;3	1.52e-19	182.08	16799000000	149100	230970	444930	223540	270020	481480	92851	121370	104780
FNADAFEEMVAQK	13	0	1498.68	Q08200	Q08200	171	183	yes	2;3	5.1e-20	182.08	511160000	61205	126610	126860	30372	52324	53697	60253	61294	64601
ASTDFVTGADVTK	13	0	1310.64	F1NUI2;Q91957	F1NUI2	360	372	yes	2	7.49e-31	182.08	0	0	0	0	0	0	0	0	0	0
GVNTLVGYDLVPEPK	15	0	1599.85	E1C043	E1C043	63	77	yes	2;3	3.4e-26	182.02	1718500000	138400	269330	258620	45556	111480	103400	340940	248510	294760
VWSIGETAPEEAEKR	15	1	1700.84	A0A3Q2UBY4;A0A1D5PE78;A0A1D5PHW7	A0A3Q2UBY4	34	48	yes	3	4.92e-30	182.02	2480100000	123680	429420	213820	97544	155610	420480	158910	126830	129010
QNVSHSADMSDQK	13	0	1445.62	A0A3Q2UB77;A0A1L1S103	A0A3Q2UB77	977	989	yes	3	1.55e-21	181.76	4068900000	115060	191530	178360	72855	172840	131180	209570	130780	152810
TPSQYDASELK	11	0	1237.58	P17785;A0A1C9KD18	P17785	105	115	yes	2;3	5.54e-09	181.68	3693900000	91364	136160	174560	85216	245970	211420	103240	57856	50140
LLPPEIELDAELR	13	0	1506.83	A0A3Q2TS15	A0A3Q2TS15	1291	1303	yes	2;3	2.91e-32	181.68	2791100000	75071	117590	113720	125020	158080	188310	196140	209460	216630
GLTPTGMLPSGVLSGGK	17	0	1570.84	Q7T1F5;A0A3Q2U159;A0A1D5P3Y2	Q7T1F5	419	435	yes	2;3	9.73e-25	181.67	746710000	122600	190470	226790	47049	86376	83646	0	0	0
ESTVPLTLSTSSVK	14	0	1447.78	F1P2E9	F1P2E9	468	481	yes	2;3	3.79e-25	181.66	277270000	20643	45011	53037	6885.8	16354	14478	45884	40455	42355
TGSVSSQYNLSSK	13	0	1356.65	A2NBE2;E1BX17	A2NBE2	505	517	no	2	6.18e-21	181.66	235140000	0	0	0	7931.4	31012	33938	49914	29045	32192
REDVMDATTSSQTSSEDR	18	1	2013.85	Q5ZLR5	Q5ZLR5	91	108	yes	3	5.04e-63	181.63	1697600000	17473	13812	19204	17246	27724	18935	16716	13178	14131
TSVVVQWDKPK	11	1	1285.7	F1NNW0;Q02173;A0A1D5PKV3	F1NNW0	614	624	yes	2;3	1.09e-10	181.62	7443200000	27211	111290	100550	2186.8	5595.9	10236	54948	98143	75735
DDTLYEDDDVK	11	0	1326.55	D0VX30;A0A1D5P7X9;A0A3Q2UJ64	D0VX30	34	44	yes	2;3	7.52e-10	181.62	1748500000	23292	50838	52975	7613.7	21557	19624	87711	54103	74194
DYSVTAHSK	9	0	1006.47	P00340;E1BTT8	P00340	82	90	yes	2;3	0.00011233	181.55	98078000000	305870	342570	377690	130050	303710	183900	496980	242090	308540
NAAGAISKPSDSTGPITAR	19	1	1812.93	A0A3Q2TS15	A0A3Q2TS15	3035	3053	yes	2;3	6.32e-52	181.54	10873000000	99697	300250	262930	76666	361150	192750	506140	320430	303190
STHPHFVR	8	0	979.499	A0A1D5P525;Q9DGM4;A0A1D5P603;A0A1D5PUR6;A0A1D5NVW6;A0A1D5NYC2;A0A1D5PFB7;A0A1D5NXZ4;F1P3X1;P02565;P13538;Q9DGM5;R4GIG1	P13538	667	674	no	2;3;4	0.00066645	181.49	79456000000	313980	372350	411470	375980	206570	342760	111960	278920	235730
IAVSDFADITTLR	13	0	1420.76	Q9W6H0	Q9W6H0	130	142	yes	2	6.57e-21	181.44	230590000	198490	204530	261700	0	0	0	0	0	0
IENHEGVR	8	0	952.473	A0A1D5P9V0;P00548;F1NW43	A0A1D5P9V0	290	297	no	1;2;3	0.00017452	181.41	359040000000	756440	604250	647940	391330	616950	572900	634950	489470	550670
EQISDIDDAVR	11	0	1259.6	Q5ZK63;A0A1D5P521;A0A182C621;A0A182C5X3	Q5ZK63	114	124	yes	2	7.98e-10	181.4	699190000	15941	16435	17110	5334.1	9233.9	6594.2	33964	19233	19637
IDIPAGAVLENK	12	0	1238.69	A0A1D5P0A1;A0A1L1RP39;Q5ZKW4;Q8JH65	A0A1D5P0A1	486	497	yes	2;3	1.58e-13	181.4	2811800000	182620	326010	327010	47218	122760	115050	310080	240160	248110
LLGPENAASVLEAQSEDMQNTQNAENVR	28	0	3027.42	A0A1D5NT92	A0A1D5NT92	207	234	yes	3	1.85e-92	181.37	896210000	11531	9444.8	11519	2072	3682.1	2855.7	15149	11122	11671
EMANMKEEFEK	11	1	1384.6	A0A1D5P525;Q9DGM4;A0A1D5PUR6;A0A1D5NVW6;A0A1D5NYC2;P02565;P13538;Q9DGM5;R4GIG1	P13538	851	861	no	2;3;4	1.99e-11	181.32	403270000000	3875400	9672500	9597900	1213000	3185900	3302300	6856100	6897000	7221100
NIQNTVQETENLAEQAR	17	0	1956.95	A0A3Q2UAJ4;F1NI05;Q90ZN3	A0A3Q2UAJ4	1103	1119	yes	2;3	2.74e-25	181.26	3064500000	110340	94589	100030	31840	57732	44722	94649	68218	71372
IVYGHLDDPAK	11	0	1226.63	Q8AYI3;Q5ZMW1	Q8AYI3	71	81	yes	2;3	8.29e-10	181.25	2239700000	122130	233430	241220	27733	64453	67582	104580	89590	96975
KIAEKDEEIDQLK	13	2	1557.83	A0A1D5P525;Q9DGM4;A0A1D5P603;A0A1D5PUR6;A0A1D5NVW6;A0A1D5NYC2;F1P3X1;P02565;P13538;Q9DGM5;R4GIG1	P13538	1578	1590	no	2;3	7.28e-48	180.97	0	0	0	0	0	0	0	0	0	0
DLYQMSPSEVK	11	0	1295.61	A0A1D5P1V6;R4GHJ7;Q5ZME3;A0A1D5PA64;A0A1D5PND5	A0A1D5P1V6	902	912	yes	2;3	8.87e-10	180.97	1985100000	37605	61283	57456	111830	262470	217620	111750	72503	81377
IISSIEQK	8	0	916.523	Q5ZMT0;F1P2P9	Q5ZMT0	62	69	yes	2;3	7.76e-07	180.93	6050400000	119510	211170	212010	213550	469390	419510	161380	119120	124150
TYGGCEGPDAMYVK	14	0	1546.64	Q5ZJT7	Q5ZJT7	7	20	yes	2;3	5.26e-22	180.88	583500000	9125.7	15352	18036	53123	131760	99778	33599	24658	24574
SLIASEEEYSTK	12	0	1355.65	A0A1D5P9X2;A0A3Q3ACB9;A0A3Q2U8I1	A0A1D5P9X2	206	217	no	2	1.8e-14	180.88	361590000	42525	29969	27205	23193	18498	19988	48413	42004	41414
GSEPTRPTLMQSLSCPATCQR	21	1	2376.1	A2NBE2;E1BX17	A2NBE2	357	377	no	3	2.5e-78	180.86	106370000	0	0	0	6099.7	6397.5	15824	0	0	0
MLAVHDGFEGLALGK	15	0	1556.8	A0A1D5PUQ7;Q90YA3	Q90YA3	420	434	no	3	5.14e-30	180.84	2239800000	349250	658220	619930	74020	104610	128470	125890	186190	157960
NNTATTYPQPEDLEAFIR	18	0	2078.99	Q90XC0;F1P0Y6;A0A3Q2UB37;A0A1D5P779	Q90XC0	513	530	yes	2;3	3.04e-29	180.84	674810000	18864	38516	43038	22827	49924	55470	91880	86314	84851
SDLGTQENVHTLEPDVWK	18	0	2066.99	A0A1D5PGJ1	A0A1D5PGJ1	107	124	no	3	1.55e-51	180.81	891550000	26194	46995	50368	20444	40790	41579	50554	44926	52507
MVAEAMAELK	10	0	1091.54	E1BVT3	E1BVT3	314	323	yes	2;3	8.31e-06	180.8	6858500000	242250	368700	427990	185340	431210	384620	501950	361400	421270
EQLEEFEAQLR	11	0	1390.67	Q8JIG5;A7UEB0	Q8JIG5	155	165	yes	2;3	9.5e-10	180.66	5065700000	229200	169340	168530	174600	171370	156410	315430	170510	161950
ASPQLNDAVLK	11	0	1154.63	A0A3Q2UD12;P15989;F1P2F0;A0A1D5PGD5;A0A3Q3AR07;A0A3Q2UMJ2;A0A3Q2U4U7	A0A3Q2UD12	2321	2331	yes	2;3	4.42e-09	180.66	2113600000	140780	165100	203970	110600	214500	194480	300490	192860	183090
ARPAQAGPGAYLPEDESR	18	1	1883.91	A0A3Q2UB77;A0A1L1S103	A0A3Q2UB77	625	642	yes	3	2.89e-51	180.62	3973800000	124220	140320	143390	96223	133320	117810	265330	201220	205140
FLEQQNALMVAEVNR	15	0	1760.89	E1BZ05;P02542;O73665	E1BZ05	120	134	yes	2;3	4.75e-26	180.48	473560000	17701	30048	29377	34893	65214	70370	0	0	0
KTDETDWTTAIQNLR	15	1	1790.88	A0A3Q2TS15	A0A3Q2TS15	5560	5574	yes	2;3	4.29e-29	180.48	9925400000	129100	250510	274100	127310	196500	256220	165330	229990	199860
NVEYSSGR	8	0	910.414	F1NNK5	F1NNK5	57	64	yes	2	0.00084533	180.45	10623000000	61743	129800	119840	56365	173090	202950	110320	66152	75983
ATEPVIAFYK	10	0	1137.61	P05081	P05081	157	166	yes	2;3	3.41e-26	180.44	52876000000	683500	1205600	1248000	361500	651120	628560	1011300	840180	824410
KDIGQYTCDCGTDQTSANLNIEDR	24	1	2773.19	A6BM71;A6BLM5	A6BM71	6319	6342	yes	3	5.68e-84	180.37	843930000	8975.4	17154	16500	10963	25465	24490	19684	16045	16148
APSGSEEPCLLK	12	0	1286.62	Q90WF0	Q90WF0	1924	1935	yes	2	2.01e-14	180.36	2355300000	65802	90721	96431	78981	141050	117200	215660	158100	156410
AASAYAVGEVK	11	0	1064.55	E1C9H8	E1C9H8	344	354	yes	2	1.01e-09	180.36	331540000	46784	77195	95010	33877	85016	69977	59670	51810	48273
LQAEAPHIVVGTPGR	15	0	1543.85	A0A1L1RUX2;A0A1D5PVM5;Q8JFP1;A0A1D5P2Y8	A0A1L1RUX2	111	125	yes	2;3	4.61e-26	180.3	793980000	34005	50407	49673	12003	17071	18253	118540	99558	103320
TTATSPVTATAGAK	14	0	1275.67	A0A1D5NW88;A0A1D5NTC3;Q98906	A0A1D5NW88	725	738	yes	2	2.49e-20	180.2	50299000	0	0	0	0	0	0	56968	54400	49740
ASSSLSGTSENR	12	0	1194.55	A0A3Q2UFS4	A0A3Q2UFS4	181	192	yes	2	2.08e-14	180.19	1045700000	28276	30927	36952	21242	34440	25422	33965	23605	27158
THMMLQESSSATEK	14	0	1578.7	F1P0N2	F1P0N2	55	68	yes	2;3	9.34e-25	180.18	2047100000	41894	76037	80501	76908	128560	271710	184330	128900	134760
VEFEQNLSEK	10	0	1221.59	Q5ZMI2;F1P3U1;A0A3Q3AHD7	Q5ZMI2	462	471	yes	2;3	2.41e-06	180.15	1438100000	111240	188720	211000	100690	262400	211340	177360	116960	133760
SALAHALQSAR	11	0	1123.61	A0A1D5PUR6	A0A1D5PUR6	1331	1341	no	2;3	1.05e-09	180.15	1732300000	6231.6	84822	26438	16397	42780	129210	0	0	0
NKDPLNETVIGLYQK	15	1	1730.92	A0A1D5P525;Q9DGM4;A0A1D5PUR6;A0A1D5NVW6;A0A1D5NYC2;F1P3X1;P13538;Q9DGM5	P13538	600	614	no	2;3	1.93e-46	180.09	84466000	0	0	0	14203	28037	42029	0	0	0
DCGGAAAILGAFK	13	0	1249.61	F1NSZ4	F1NSZ4	283	295	yes	2;3	4.16e-17	180.07	1165600000	142900	249970	270040	50678	92182	109650	117040	123020	119420
IDAMHGVVGPYVK	13	0	1384.72	F1NN63;Q2UZR2	F1NN63	222	234	yes	2;3	3.51e-19	180.07	26632000000	154910	262550	325050	58229	121540	138820	73141	71325	73614
GNIQDLAELK	10	0	1099.59	A0A1D5P5M6;E1BQD1	A0A1D5P5M6	96	105	yes	2;3	2.45e-06	180.07	5325000000	228040	351780	439120	46920	115050	91906	287340	206800	215750
FPVTGLIEGR	10	0	1087.6	F1N9Z6;A0A1D5PSF9;Q90724	F1N9Z6	571	580	yes	2	2.46e-06	180.03	7763700000	43326	77778	79082	15330	22984	27042	50885	63472	64556
MINDVNAQR	9	0	1059.51	A0A1D5P603	A0A1D5P603	1273	1281	no	1;2	0.0001571	180.03	62023000000	81314	151870	133240	128540	331050	111560	577290	183910	151810
AVGAFSAAESFNYK	14	0	1460.69	P80026;C1L370;A0A1D5P544	P80026	14	27	yes	2;3	7.4e-21	179.94	412100000	0	0	0	8641.1	17255	23021	257950	130120	107560
EATVVVTSDK	10	0	1047.54	Q9IAR9	Q9IAR9	456	465	yes	2	9.07e-06	179.8	920370000	61998	141350	116060	85479	250510	251150	127190	71247	76015
TEAYAVSSFK	10	0	1101.53	P79757	P79757	258	267	yes	2;3	2.57e-06	179.8	16103000000	111830	215510	236280	114870	325610	266440	415450	277700	285200
DFEVGEGFVPVCSLALDQAGR	21	0	2265.07	A0A3Q3A4F4	A0A3Q3A4F4	211	231	yes	2;3	2.99e-29	179.79	328310000	21763	42193	45553	0	0	0	5521.1	5454.6	5663.6
VAGAALPCAPAVK	13	0	1223.67	P16419	P16419	73	85	yes	2;3;4	3.15e-24	179.68	57766000000	239220	477510	526830	51179	137180	103420	670470	523870	547030
DLGLAQISATNTK	13	0	1330.71	A0A1D5PQ96;Q5ZLI9;A0A1D5PH80	A0A1D5PQ96	250	262	yes	2	3.35e-19	179.67	136250000	0	0	0	0	0	0	61264	39193	45355
SGNGEVTFANVK	12	0	1221.6	A0A1D5PP62;A0A1D5PSJ5;F1P3D8	A0A1D5PP62	101	112	yes	2	2.32e-14	179.6	367810000	26796	44007	23808	11941	43780	37088	84068	62796	62616
AVNAEGTSDALESDEVVTISK	21	0	2134.03	A0A1D5PUM7;E1C7I7	A0A1D5PUM7	1833	1853	no	2;3;4	4.1e-65	179.58	7474200000	139210	169850	192910	118760	206820	168300	151680	155780	142540
NSVTLTWNPPK	11	0	1255.66	Q07784	Q07784	76	86	yes	2;3	6.46e-09	179.57	3993900000	144840	382920	380840	13965	34401	33292	214790	192200	181630
ELLALDSVDPEGR	13	0	1412.71	F1NY41;A0A1L1RVW9	F1NY41	445	457	yes	2;3	9.79e-21	179.57	3482600000	167400	167440	171750	109930	126500	110270	156410	136680	147330
KVTDDISSVK	10	1	1090.59	A0A3Q3A4C6;A0A1D5NY50;Q9DEH4	A0A3Q3A4C6	1645	1654	no	2;3	2.31e-06	179.57	5376800000	102180	185820	200140	73694	192610	138220	166010	111050	119890
VQAAQSEAK	9	0	930.477	Q5ZMI2;F1P3U1;A0A3Q3AHD7	Q5ZMI2	305	313	yes	2;3	6.26e-05	179.51	938350000	30168	43144	53124	49752	96903	100250	147330	100850	113700
GYSLPPHCSR	10	0	1172.54	P00565;A0A3Q2U6M6	P00565	139	148	yes	2;3	6.44e-06	179.51	20472000000	689650	489050	559170	387750	383440	401620	1198000	924180	1018500
EAFTVIDQNRDGIIDKDDLR	20	2	2332.17	P02609	P02609	31	50	yes	3;4	4.27e-63	179.46	10663000000	115300	248020	340470	29001	44167	57105	80335	205570	157070
LLAPIETLTADQIR	14	0	1552.88	A0A3Q2UD12;P15989;F1P2F0;A0A1D5PGD5;A0A3Q3AR07;A0A3Q2UMJ2;A0A3Q2U4U7	A0A3Q2UD12	1204	1217	yes	2	6.96e-22	179.46	330020000	0	0	0	52412	79809	85405	0	0	0
LFPPSADYPDLR	12	0	1389.69	P11009;F1NAD3	P11009	47	58	yes	2;3	2.39e-14	179.42	586830000	28159	30270	32343	56888	128690	104250	137940	109670	111650
LNFSHGTHEYHEGTIK	16	0	1868.88	A0A1D5P9V0;P00548;F1NW43	A0A1D5P9V0	93	108	no	2;3;4;5	1.18e-32	179.41	15974000000	219090	141790	159640	322670	114540	162730	15162	22021	33870
SEEQLCQPAESR	12	0	1432.63	R4GJM5	R4GJM5	127	138	yes	2;3	2.42e-14	179.35	2996600000	35009	47887	43811	22118	48321	40130	61125	44821	55264
SVQTTLQTDEVK	12	0	1347.69	F1NBD0;F1NJ94;Q5F3C5	F1NBD0	61	72	yes	2	2.42e-14	179.35	223590000	19235	34320	37868	6765.9	19214	14068	31361	23210	25017
TMVATAQQLSEGR	13	0	1390.69	A0A1D5P384	A0A1D5P384	38	50	yes	2	1.02e-20	179.35	355250000	24546	39123	42310	11922	29404	26437	51572	33355	36999
ILSPVCGTDGFTYDNECGICAHNAEQR	27	0	3083.32	A0A3Q2UJ85;P10184;F1NMN2	A0A3Q2UJ85	158	184	yes	3	4.61e-92	179.33	789040000	21547	33852	35549	16395	13903	15862	43438	41105	38027
ITITNDQNR	9	0	1073.55	Q90593	Q90593	522	530	yes	2	0.00052353	179.28	1661400000	197680	234720	260350	138230	328040	269220	168100	120350	121450
QNQHEELQNVR	11	0	1393.67	A0A1D5NX47;A0A3Q3ANR7	A0A1D5NX47	264	274	yes	3	1.63e-17	179.19	1712000000	45357	21371	22469	47518	34650	33578	30790	25834	31797
FEEILHR	7	0	942.492	P00565	P00565	308	314	yes	1;2;3	1.59e-09	179.16	225560000000	790200	1312700	1519200	555710	763840	1161900	1087300	1586900	1515900
DGQDPFETGNLPEDLGYHVQMK	22	0	2489.12	F1P0N2	F1P0N2	193	214	yes	3;4	4.31e-74	179.03	4320100000	77106	162810	168280	7462.8	13152	19241	89111	108910	118600
KLETDIAQIQSEMEDTIQEAR	21	1	2447.18	A0A1D5P525;Q9DGM4;A0A1D5NVW6;F1P3X1;Q9DGM5	A0A1D5NVW6	1737	1757	no	2;3;4	5.88e-65	179.03	18516000000	44540	92574	67189	157420	255240	474080	159790	169190	165020
LEDECSELK	9	0	1121.49	A0A1D5P525;Q9DGM4;A0A1D5P603;A0A1D5PUR6;A0A1D5NVW6;A0A1D5NYC2;A0A1D5P600;A0A1D5PFB7;A0A1D5NXZ4;F1P3X1;P02565;P13538;Q910C5;Q9DGM5;R4GIG1;F1NM49;Q9IBD4;P29616	P13538	946	954	no	2;3	1.66e-07	178.94	92394000000	607900	1377700	1372800	401930	1121100	1149300	1402200	1086600	1246900
LEADVSGRPPPTMAWTK	17	1	1854.93	A0A3Q2TS15	A0A3Q2TS15	917	933	yes	2;3	7.08e-40	178.88	4563300000	171340	323580	352630	20040	34290	35155	285950	291600	268240
IEEALGDK	8	0	873.444	P07322	P07322	413	420	yes	1;2;3	1.11e-12	178.83	796690000000	3133300	5986500	6635700	3054900	9068700	6611800	8281100	6048300	6835900
VHPISTAVK	9	0	950.555	P00340;E1BTT8;A0A1D5NZ01	P00340	270	278	yes	2;3	0.00032823	178.83	132650000000	1122600	1834000	2111100	360100	751080	760730	1184500	940370	958140
LQNLQLQPGK	10	0	1137.65	F1NSS4;Q07598	F1NSS4	522	531	yes	2;3	3.02e-06	178.83	320410000	43438	43389	78348	40563	107340	80588	44419	33038	54800
LTVLEPAVIVEK	12	0	1309.79	A6BM71;Q98918	A6BM71	3551	3562	yes	2	1.33e-33	178.81	0	0	0	0	0	0	0	0	0	0
TILNAAEEILK	11	0	1213.69	A0A3Q2UBH5;F1NH35	A0A3Q2UBH5	105	115	yes	2;3	5.19e-09	178.81	1227100000	130290	297440	276080	56211	116750	149330	112660	144040	143510
LQDPQGQESLVR	12	0	1368.7	D3KCC4;A0A1D5PQ89	D3KCC4	240	251	yes	2	2.68e-14	178.71	1079200000	13893	8614.6	7625.9	30990	40934	37140	139530	82526	92916
DLEADVVGDTSGHFK	15	0	1588.74	Q6B344;A0A1D5PY67;E1BWX1;P51901	Q6B344	139	153	yes	3;4	5.55e-41	178.67	9536400000	304480	264010	323670	325900	338110	367380	377510	315150	325570
TQETLSQAGQK	11	0	1189.59	Q5ZI93;A0A1L1S003;A0A1L1RQD7;A0A1D5NXQ7;A0A1D5PV84;A0A1L1RMB6;A0A1D5PFP7	Q5ZI93	129	139	yes	2	5.81e-09	178.67	70908000	0	0	0	0	0	0	38380	25755	23029
YGHNELPAEEGK	12	0	1342.62	P13585	P13585	36	47	yes	2;3	1.43e-33	178.67	114450000000	261720	549060	810730	188310	371550	936620	399520	627720	566380
TLPGGNQCIVPICR	14	0	1583.79	F1NII7;A0A1D5NW86	F1NII7	76	89	no	2;3	7.92e-22	178.67	407140000	50908	92540	96066	0	0	0	36373	26880	24648
SALFAQLNQGEAITK	15	0	1589.84	E1BZ03	E1BZ03	264	278	yes	2;3	6.93e-29	178.67	781430000	23628	48668	50214	43114	78498	90132	53619	43957	43939
ATPEEPAILDNPK	13	0	1393.71	E1BVD1	E1BVD1	219	231	yes	2;3	3.52e-19	178.67	3182200000	107580	108760	132480	111560	238990	177000	255970	171560	209390
LQEEMLQR	8	0	1045.52	F1NJ08;A0A1L1RXL9;P09654	F1NJ08	183	190	yes	2	0.0011553	178.65	12796000000	236740	249490	242740	172450	247480	275930	257730	157910	162750
GGVPLTTGYR	10	0	1019.54	A6BM71;Q98918;Q9IAR9	A6BM71	863	872	no	2	3.11e-06	178.65	5275000000	105700	184730	203310	50675	104180	91030	109020	100590	97534
LSYNTASNK	9	0	996.488	A0A1L1S0X5	A0A1L1S0X5	11	19	yes	2	0.00020078	178.55	294700000	0	0	0	14589	34867	27545	77955	49690	57451
AADGTWQDFATGK	13	0	1366.62	P27731;A0A1I7Q422	P27731	59	71	yes	2;3	9.18e-40	178.32	1212300000	36443	48994	53479	80957	202320	188180	212570	155250	159630
DEEKMELQEIQLK	13	1	1631.81	Q5ZLJ7;A0A1D5P9B0;A0A1D5P2B9;A0A1D5PV56;A0A1L1RJZ6;A0A1L1RVU7;H9L3K0;H9L074	H9L3K0	137	149	no	2;3;4	3e-22	178.32	150520000000	456610	1162800	1333100	180020	510940	609560	614740	859280	746470
AITIAGIPQSIIECVK	16	0	1711.95	A0A1D5P893;A0A1D5PAH2;A0A1D5PD11	A0A1D5P893	145	160	yes	2;3	1.85e-24	178.32	787210000	130360	249960	312450	54091	76385	134190	0	0	0
EVMESEMR	8	0	1009.42	Q5ZMI2;F1P3U1;A0A3Q3AHD7	Q5ZMI2	428	435	yes	2	0.001216	178.3	631270000	30301	32662	30887	8192.4	18481	13985	19888	13588	15295
TSTSLSIK	8	0	835.465	A0A3Q2TS15	A0A3Q2TS15	4884	4891	yes	2;3	0.0026239	178.3	11493000000	181630	559660	522150	38953	159570	105590	246840	172850	175290
CSVLVTPELK	10	0	1144.62	F1NNW0;Q02173;A0A1D5PKV3	F1NNW0	287	296	yes	2;3	9.01e-06	178.22	11868000000	188780	428580	458140	91351	336420	275660	476810	416450	396460
VANPVVEMDGDEMTR	15	0	1661.74	Q5ZL82;A0A1D5P8I7	Q5ZL82	46	60	yes	2;3	3.23e-29	178.15	6910800000	150360	121710	140780	147620	161880	155730	111440	80954	91608
VEGDVCSLNEFSITGSTYAPEGDVLK	26	0	2786.3	P13585	P13585	372	397	yes	2;3;4	2.46e-98	178.14	15408000000	319130	638420	697700	263860	425350	579630	510970	557050	624560
DDQGEYSFVVDGK	13	0	1457.63	A6BM71;Q98918;Q9YH41	A6BM71	2058	2070	no	2;3	3.14e-19	178.1	2097700000	208140	241870	299590	162830	178670	206770	204450	162490	193770
WGSVCDDNWDMK	12	0	1511.58	Q98TD1;A0A1L1S0P1	Q98TD1	380	391	yes	2;3	1.83e-13	178.08	1134200000	133730	257950	277160	112620	192160	221630	293340	261400	230480
GSVPLDTITFYK	12	0	1339.7	P81628;F1NRM8	P81628	28	39	yes	2	1.35e-19	178.08	0	0	0	0	0	0	0	0	0	0
DVEQIQSAVK	10	0	1115.58	A0A1D5PHJ8;A0A1D5PGQ9;A0A1D5PFB8;A0A1D5PTE2;Q9PTG6;A0A1D5PCQ7	A0A1D5PHJ8	93	102	yes	2;3	8.46e-06	178.08	632190000	51866	64466	73938	39130	68195	53533	189890	129470	141670
GSGTAEVELKK	11	1	1117.6	A0A1D5P9V0;P00548;F1NW43	A0A1D5P9V0	145	155	no	2;3	5.07e-09	178.08	48720000000	298130	477680	397590	254420	879770	521460	1012800	719530	664070
TYEDQLSEAK	10	0	1182.54	A0A1D5NZY9;Q8UWA0;P79793	A0A1D5NZY9	1259	1268	no	2;3	8.46e-06	178.08	5855300000	5410.8	18026	9808.9	80790	548220	93591	155750	119040	123060
LDDECEYSCGVDDRK	15	1	1859.73	A6BM71;A6BLM5	A6BM71	7123	7137	yes	3	1.5e-35	177.88	7507900000	182610	334750	288530	134750	510550	281090	247640	181790	158380
NTSQGTVTGQVQGPEDK	17	0	1744.82	P07031	P07031	46	62	yes	2;3	1.28e-39	177.84	6772800000	72855	193370	213710	63926	252080	194500	185100	138800	166290
SGDAAIVEMIPGK	13	0	1286.65	F1N9H4	F1N9H4	396	408	yes	2;3	1.29e-20	177.76	2628400000	211890	371840	388180	82688	137370	168450	241220	197550	211360
KLEVEANNAFDQYR	14	1	1695.82	P14315;A0A1D5P9M3;A0A452J864	P14315	95	108	yes	2;3	3.03e-22	177.74	2576800000	131590	122840	129910	70879	116590	145070	266850	387790	357310
AAVGMTAGATGAFVGTPAEVALIR	24	0	2230.18	A0A1D5PNK3	A0A1D5PNK3	113	136	yes	2;3	4.94e-36	177.74	264250000	10214	18391	19362	9868.2	18011	19438	36638	33529	34238
EVTERAEDEEEINAELTAK	19	1	2175.02	A0A1D5P525;Q9DGM4;A0A1D5P603;A0A1D5PUR6;A0A1D5NVW6;A0A1D5NYC2;F1P3X1;P13538;Q9DGM5;Q7LZL0	P13538	924	942	no	3;4	1.3e-51	177.61	24697000000	376070	345730	294950	461390	1445900	658500	1319700	991750	669150
TLSSSGYASNK	11	0	1113.53	A0A1D5PCL0;Q90985	A0A1D5PCL0	2879	2889	no	2	1.58e-09	177.57	404950000	2062.3	6823.4	6189.9	8153.9	27545	18644	24142	18316	19236
EDQIFSMNPPK	11	0	1304.61	A0A1D5P603;Q90910;A0A1D5NVW6;Q90913;P02565;Q9DGM5;R4GIG1	A0A1D5P603	74	84	no	2;3	1.58e-09	177.57	50837000000	157860	467160	482050	192560	550620	270580	1723100	650650	546380
LGLVEEGSLYVFK	13	0	1452.79	A0A140F3I0;A0A140F3H9;A0A140F3H8;A0A140F3H6;A0A3Q2TXF6;P19204;F1NQT9	A0A140F3I0	74	86	yes	2	1.32e-20	177.57	74266000	0	0	0	0	0	0	24651	64373	50893
TVGAAGEPHGGTAETAQEK	19	0	1809.85	A2NBE2	A2NBE2	54	72	yes	3;4	7.43e-52	177.44	3455900000	47851	107960	100560	62341	112620	195610	259400	95573	152600
FTITPPTAQVAAVLK	15	0	1555.9	P13127;Q5ZLP3	P13127	179	193	yes	2	2.21e-30	177.42	0	0	0	0	0	0	0	0	0	0
TDTFTMLSISNAER	14	0	1584.75	A0A1D5PUM7;E1C7I7	A0A1D5PUM7	1714	1727	no	2;3	9.43e-22	177.41	781620000	42773	97136	90896	71509	125510	163860	66966	106940	85552
EGSQGELTPANSQSR	15	0	1559.72	F1NB10;Q5ZLU7	F1NB10	468	482	yes	2;3	2.71e-26	177.38	442860000	8757.1	10113	10203	3373.1	8714.1	6863.6	10143	8094.8	7063.6
YAVFDLAEGK	10	0	1111.56	F1NNW0;Q02173;A0A1D5PKV3	F1NNW0	558	567	yes	2;3	3.71e-06	177.36	4709000000	171880	384940	432930	66134	131790	204760	267060	379380	336150
ASIDVSDNR	9	0	975.462	A0A3Q2TS15	A0A3Q2TS15	5667	5675	yes	2	0.00023574	177.36	6812200000	11384	12305	11045	60212	86501	62557	95876	68086	76999
SGDLAVTVTAPTGSK	15	0	1402.73	F1NK40;H1AC38	F1NK40	1269	1283	yes	2	5.81e-21	177.1	136030000	14921	20593	20747	0	0	0	38436	23296	22972
STLPATILTK	10	0	1043.62	P79757	P79757	324	333	yes	2;3	9.82e-06	177.06	6804200000	103990	192520	273590	113400	241820	378010	96357	101660	87621
ITYAQCGDVLR	11	0	1294.63	F1P5V6;P02606	F1P5V6	70	80	yes	2	1.71e-09	176.95	2288000000	0	0	0	34099	306990	56335	97568	84984	89410
DEIEAPGASLDPK	13	0	1340.65	A0A3Q2TS15	A0A3Q2TS15	4136	4148	yes	2;3	1.43e-20	176.95	71814000000	314030	591540	610690	267710	701270	531420	672910	478460	520780
RANLLQAETEELR	13	1	1541.82	A0A1D5P603	A0A1D5P603	1681	1693	no	2;3	4.83e-21	176.89	5046800000	74125	126900	136860	20275	44997	33132	192950	139880	134970
TSSGAGSSSFSSSR	14	0	1303.56	A0A3Q2U0S7;Q5F491	A0A3Q2U0S7	582	595	yes	2	1.01e-21	176.87	555960000	21098	27491	28618	12550	20907	17280	21663	14528	16575
EALLQHLEK	9	0	1079.6	Q9DEA4;H9KZU7;Q9PUQ7;A0A3Q2UAU4	Q9DEA4	58	66	yes	2;3	4.6e-05	176.83	4648400000	124430	176380	182100	104190	197910	193750	200080	235490	220660
FQAEIQMVNK	10	0	1206.61	Q5ZJQ6;Q5ZJQ5	Q5ZJQ6	323	332	no	2	3.08e-25	176.83	82367000	0	0	0	0	0	0	60029	43552	43771
SGFIEEEELK	10	0	1179.57	P80026;C1L370;A0A1D5P544	P80026	55	64	yes	2;3	3.95e-06	176.83	32493000000	246600	835230	1176300	224950	574980	668790	2142900	471820	478610
HALIIYDDLSK	11	0	1286.69	A0A1L1RY35;A0A1D5PN54;A0A175KE65;Q8UVX3;A0A1D5PJG9;A0A1L1RZJ6;A0A182C637;A0A1D5P3S4	A0A1L1RY35	291	301	no	2;3	1.73e-09	176.83	10027000000	199470	235260	234730	28975	60631	61816	206620	184830	188420
EGPYDVIVLPGGNLGAQNLSESAAVK	26	0	2597.33	D5M8S2;Q8UW59	D5M8S2	64	89	yes	2;3;4	6.97e-47	176.81	13990000000	228460	444650	492850	130450	262240	268660	501410	445420	450470
EELTLEGIK	9	0	1030.55	A0A1L1RUX2;A0A1D5PVM5;Q8JFP1;A0A1D5P2Y8	A0A1L1RUX2	203	211	yes	2;3	0.0004467	176.79	2243500000	178850	307130	331160	126470	308160	258120	300920	264510	250970
ILCTEEGIR	9	0	1089.55	F1NNW0;Q02173;A0A1D5PKV3	F1NNW0	1228	1236	yes	2	0.00044987	176.75	91943000000	354230	542130	533710	168030	348730	271890	392090	285320	306000
GNVGLAGPR	9	0	839.461	P02467	P02467	510	518	yes	2	0.00025636	176.66	17319000000	50593	31128	85433	113650	108610	207090	154830	62032	77766
SECCCDGGR	9	0	1099.35	F1NII7	F1NII7	2353	2361	no	2	0.00025807	176.6	317820000	2494.9	3450	3373.7	1221.4	3807.1	3093.1	25693	23766	18753
ESVAADAGR	9	0	874.414	A0A3Q2TS15	A0A3Q2TS15	5974	5982	yes	2	0.00025807	176.6	52270000000	87814	103640	108890	154050	311780	213610	235810	167520	190120
ETITESAGR	9	0	962.467	A0A1L1RIN1	A0A1L1RIN1	55	63	yes	2	0.00025807	176.6	572990000	31124	27058	28386	41199	77065	59208	0	0	0
LVQDYGLESEVAQHLASTYGDK	22	0	2422.17	F1NCA2	F1NCA2	483	504	yes	3	6.07e-74	176.54	943420000	36632	63728	62304	64980	67896	89398	53228	73797	80668
SDSCYLTWKEPEDDGGSVITNYVVER	26	1	3018.36	Q07784	Q07784	668	693	yes	3;4	3.51e-84	176.53	1173500000	39371	80998	70902	39234	76013	73726	70565	136560	93910
MATEVAADSLGEEWK	15	0	1635.74	Q9PTD6;P47838;F7BYQ2	Q9PTD6	30	44	yes	2;3	1.85e-21	176.51	383710000	18191	37037	39212	70855	186840	173090	0	0	0
GTSGQASSLSSGK	13	0	1165.56	O93419	O93419	1304	1316	yes	2	1.51e-20	176.51	169310000	11862	23909	21326	0	0	0	40961	34676	25101
AGQQGLLGVAIAEK	14	0	1353.76	F1NC38;A0A1L1RW35;Q5ZJ93	F1NC38	94	107	yes	2	1.05e-21	176.51	205610000	35591	61343	64822	0	0	0	30842	26024	26441
FTDEYQLFEELGK	13	0	1617.76	A0A3Q2UMD3;A0A1D5NZU2;A0A3Q2UFJ3;A0A1D5PNB0;A0A1D5NZG7;A0A3Q2UPU8;A0A3Q2U2C3	A0A3Q2UMD3	11	23	no	2	1.51e-20	176.51	297490000	24681	68546	56658	0	0	0	99500	119280	111510
AVNELGEAEVDCK	13	0	1432.65	A0A1D5PCL3;A0A3Q3AWG5;A0A3Q3A8C1;A0A1D5PBR5;E1C5Z5;A0A3Q2UBY4;A0A1D5PE78;A0A1D5PHW7	A0A3Q2UBY4	1136	1148	no	2;3	1.51e-20	176.51	6442200000	232260	292520	238800	169750	294160	367130	262410	193250	239120
FGANAILGVSLAVCK	15	0	1518.82	A0A1D5PSH6;A0A1L1RQQ0;A0A1L1RKH8;A0A1L1RNS0;P51913;F1NZ78;Q5ZIQ4;P07322	A0A1L1RQQ0	106	120	no	2	3.98e-29	176.51	304700000	22954	63050	82128	15898	21690	53210	61131	125830	99274
WMVGQCGEDIPQPTPGR	17	0	1926.87	A0A1D5PDK5	A0A1D5PDK5	33	49	yes	2;3	3.17e-55	176.51	304970000	37027	63670	78313	0	0	0	49596	58073	46809
DLEEATLQHESTAAALR	17	0	1853.91	A0A1D5NZY9;Q8UWA0	A0A1D5NZY9	1185	1201	no	2;3	5.43e-40	176.49	7411300000	33646	41823	47376	113350	179050	150700	150460	128970	153710
GFTISATEPGLSR	13	0	1334.68	A0A1D5NUR5	A0A1D5NUR5	409	421	yes	2	1.52e-20	176.45	540190000	69149	75074	87773	43770	72463	62721	133590	104310	104420
YMFEAEDKR	9	1	1187.53	A6BM71;A6BLM5	A6BM71	6146	6154	yes	2;3	0.00018025	176.44	9163000000	131710	279370	289610	73715	125830	189470	82795	104400	96593
VAGQDGSVVQFK	12	0	1233.64	Q5ZHQ1;Q5ZJM9;A0A1D5P3K7	Q5ZHQ1	21	32	yes	2	3.62e-14	176.42	715340000	66960	115250	131710	46878	110130	102110	163150	122370	122900
VGEQVNLVIPFQGK	14	0	1526.85	P16419	P16419	846	859	yes	2;3;4	1.25e-20	176.42	8919700000	74387	162790	169450	54088	129740	143560	138420	198230	173630
VVDALGNPIDGK	12	0	1196.64	A0A1L1RY35;A0A1D5PN54;A0A175KE65;Q9DDH7;Q90VX2;D5LMK9;A0A1D5PJG9;A0A1L1RZJ6;A0A182C637;A0A1D5P3S4	A0A1L1RY35	150	161	no	2;3	1.98e-13	176.42	12973000000	278610	372550	411700	113550	227790	187160	352720	244950	252190
TNEAQAIETAR	11	0	1202.59	A0A1D5PNL3;A0A1L1RY95;Q5F405	A0A1D5PNL3	131	141	yes	2;3	6.11e-09	176.42	8711200000	161530	105670	127440	196020	158980	130920	61502	44448	52336
GIWHNDNK	8	0	982.462	P00565;A0A3Q2U807;P05122;F1NZ30;A0A1L1RT82	P00565	216	223	no	1;2;3	0.00070189	176.4	133620000000	217670	412890	481750	280200	420990	647590	661460	743970	700270
VETSCNVTVEEIEIIR	16	0	1889.94	A6BM71;Q98918;Q9YH41	A6BM71	2249	2264	no	2	1.19e-54	176.4	0	0	0	0	0	0	0	0	0	0
NLPFSVENK	9	0	1046.54	R4GLP0	R4GLP0	103	111	yes	2;3	0.00046788	176.38	2538600000	139550	317460	347850	60009	190730	208820	247170	238820	243590
AESDWDTVTVLR	12	0	1390.67	Q5ZMC0	Q5ZMC0	2	13	yes	2	1.4e-41	176.38	2125700000	5985.2	7055.7	6101.3	7163.1	16459	14168	3423.3	2280.7	3457.6
TDLNHENLK	9	0	1082.54	P00565	P00565	108	116	yes	1;2;3	3.16e-07	176.38	682940000000	1943900	3425700	3861700	2100600	5823800	4884100	5541800	3826300	4272300
AGIISTVEVLK	11	0	1128.68	A0A3Q2UDT6;A0A1D5PKA9	A0A3Q2UDT6	758	768	yes	2	1.83e-09	176.38	512700000	75344	119940	124620	80880	128250	162670	80910	73702	70395
IMEIVDAITTTAQSHQR	17	0	1912.97	Q90YA3	Q90YA3	174	190	yes	3	5.53e-40	176.33	2742000000	9225.7	16265	16139	14883	17737	25889	24454	27842	24834
SELAYEVLDK	10	0	1165.59	F1NNW0;Q02173;A0A1D5PKV3	F1NNW0	1008	1017	yes	2;3	9.16e-06	176.33	34736000000	212190	622010	649810	165700	486030	467570	567340	418830	495170
YSLDPENPTK	10	0	1162.55	A0A1D5PR40;A0A182C6I3	A0A1D5PR40	4	13	yes	2	4.19e-06	176.33	959110000	47618	93993	107060	30543	94413	77031	174470	130580	144730
ADIAETQVNK	10	0	1087.55	A0A1D5NZY9;Q8UWA0;P79793	A0A1D5NZY9	1918	1927	no	2;3	4.19e-06	176.33	3903500000	0	0	0	83058	606280	119470	118240	84459	82197
EGSAVEGYNVEMR	13	0	1439.64	A0A1D5PUM7	A0A1D5PUM7	1984	1996	yes	2;3	1.54e-20	176.32	8306000000	96473	149220	176480	74804	156990	122250	190580	169680	186530
SGTIGVQELPGAFEAAGFR	19	0	1905.96	O42134	O42134	132	150	yes	2;3	2.33e-25	176.29	1679300000	112190	213310	224970	70114	99379	131640	123430	120220	127300
LPLEGGSAIPGTGCLVK	17	0	1667.89	Q5F4B1;F1NAX3	Q5F4B1	195	211	yes	2;3	2.18e-39	176.25	4312100000	160460	245540	250640	21761	36835	32561	117290	93634	103010
GETGPQGAR	9	0	871.415	A0A1D5PYU1;P02457	A0A1D5PYU1	342	350	no	2;3	0.0001974	176.09	160050000000	299180	138390	493580	335140	224610	619210	555190	136200	196060
VGTGEPVETERPVEAK	16	1	1696.86	A6BM71;A6BLM5	A6BM71	7407	7422	yes	2;3;4	3.53e-39	176.04	108820000000	542450	1203800	1294700	461570	1408900	947050	1367800	921050	980340
QVDQLTNDK	9	0	1059.52	F1NJ08;A0A1L1RXL9;P09654;Q49MC1	F1NJ08	154	162	yes	2;3	0.00014046	175.93	11103000000	270600	428140	343600	135040	338280	338950	559910	307440	292400
VGGAQSVYSK	10	0	994.508	A0A1D5PUM7;E1C7I7	A0A1D5PUM7	391	400	no	2	3.76e-25	175.93	997280000	0	0	0	43674	120610	73054	46735	51673	46864
VAVVAGYGDVGK	12	0	1133.61	A0A1D5PNB8;A0A1D5PPA8;A0A1D5NWI2	A0A1D5PNB8	188	199	yes	2;3	3.82e-14	175.93	268690000	0	0	0	92879	194810	160920	121030	78306	90346
AESEVASLNR	10	0	1074.53	Q8AWI4;A0A452J839;Q90739	Q8AWI4	81	90	yes	2	4.38e-06	175.91	1448000000	46524	35008	32832	49204	97881	63318	0	0	0
LSSAMSAAK	9	0	864.438	Q5ZME2;A0A452J7S4;A0A1D5PE17	Q5ZME2	240	248	yes	2	0.0002786	175.91	1348600000	0	0	0	21542	54807	64745	61944	62506	64167
IEEVVFEAR	9	0	1090.57	F1NX83;A0A1D5PF87	F1NX83	770	778	yes	2	0.0002786	175.91	26397000000	298290	446780	388340	253170	387900	411340	441420	445320	449330
GEENLMDLQVK	11	0	1274.62	F1NEF2;A0A1D5PZJ4;A0A1D5NTA5;Q6EE31	F1NEF2	271	281	yes	2;3	5.5e-09	175.91	1956100000	173010	165810	184850	153780	215800	169600	251250	185410	184750
DMNTQANLK	9	0	1033.49	A6BM71;A6BLM5	A6BM71	5886	5894	yes	2;3	0.00045288	175.91	18252000000	328310	564910	555320	310400	805910	580720	709020	500030	532630
GSYTTLPETR	10	0	1123.55	A0A3Q3A4C6;A0A1D5NY50;Q9DEH4	A0A3Q3A4C6	2019	2028	no	2	4.38e-06	175.91	25084000000	436750	568800	636030	217230	373060	346530	465850	359010	375130
AIVQDADTQSK	11	0	1174.58	A0A1D5PHJ8;A0A1D5PGQ9;A0A1D5PFB8;A0A1D5PTE2;Q9PTG6;A0A1D5PCQ7	A0A1D5PHJ8	276	286	yes	2;3	5.5e-09	175.91	387120000	10098	14733	18206	93947	214270	174970	70605	49127	51691
CFVVGADNVGSK	12	0	1251.59	P47826;F1NB66	P47826	27	38	yes	2	1.99e-13	175.86	505830000	5619.7	14526	14862	9619.3	42955	32837	59732	41059	37473
VDFPQDQLEK	10	0	1217.59	E1BVT3	E1BVT3	215	224	yes	2;3	9.08e-06	175.86	17408000000	608600	1226900	1311900	431360	1291700	1113800	1250900	891730	1016600
IIQYIVEMQAK	11	0	1334.73	A0A3Q2TS15	A0A3Q2TS15	2598	2608	yes	2;3	6.37e-09	175.86	624710000	0	0	0	0	0	0	96129	106170	117450
DVTVSAR	7	0	746.392	P16419	P16419	66	72	yes	2	0.002783	175.75	193050000000	226340	274070	287710	400000	728950	573250	306120	232760	262370
AGGIETIANEYSDR	14	0	1494.7	A0A1D5PPF8	A0A1D5PPF8	20	33	yes	2;3	1.14e-21	175.74	1616900000	94590	117320	121890	89095	151430	141950	186610	132240	148290
TFGTQNSNSDMIYCR	15	0	1792.75	A0A1D5PCL0	A0A1D5PCL0	1264	1278	yes	2	6.86e-21	175.74	179480000	0	0	0	4119.2	13826	10812	54121	46186	44853
TISAPIPYEELVR	13	0	1486.8	A0A1D5P061;A0A1D5PVZ4;E1BQZ7	A0A1D5P061	838	850	yes	2;3	1.07e-15	175.74	2802000000	139960	208290	190900	109680	174620	146140	193940	153940	188380
LEDECSELKK	10	1	1249.59	A0A1D5P525;Q9DGM4;A0A1D5P603;A0A1D5PUR6;A0A1D5NVW6;A0A1D5NYC2;A0A1D5P600;A0A1D5PFB7;A0A1D5NXZ4;F1P3X1;P02565;P13538;Q910C5;Q9DGM5;R4GIG1;F1NM49;Q9IBD4;P29616	P13538	946	955	no	2;3;4	1.82e-11	175.73	265290000000	673860	1691900	1710100	760780	2630400	2123100	1680900	1244300	1346700
DLTSVQNLQK	10	0	1144.61	A0A1D5PVG1;A0A3Q2TVB7;A0A3Q2U3B7;F1NHT3;A0A1D5PQC3;A0A3Q2U5Z2;A0A3Q2U342;P07751	A0A1D5PVG1	709	718	yes	2	4.46e-06	175.73	135840000	37064	58689	57616	0	0	0	59488	44329	41343
DFTPVCTTELGR	12	0	1394.65	F1NBV0;Q5ZJF4	F1NBV0	41	52	yes	2	2.28e-11	175.65	7355100000	163910	324970	331600	126040	298210	277140	278920	214650	231190
QEMQEVQNSR	10	0	1247.56	A0A3Q2U0R8;A0A3Q2U3U3;Q5ZME1;F6T6F1;A0A1D5PVH5	A0A3Q2U0R8	187	196	yes	2	7.15e-06	175.65	637500000	23614	31689	27744	29351	65249	46262	0	0	0
DESMGPGQFSR	11	0	1209.51	A0A1D5PUM7;E1C7I7	A0A1D5PUM7	265	275	no	2	1.98e-09	175.65	5368200000	160200	279890	327990	153840	446610	313140	265410	241930	240400
QVAQQEAQR	9	0	1056.53	Q5ZMN3;F1N833	Q5ZMN3	201	209	yes	2	0.0002902	175.51	3006700000	62683	47881	54660	17755	31790	25858	54494	29841	38858
TVFITSEGK	9	0	980.518	A6BM71;A6BLM5	A6BM71	5855	5863	yes	1;2;3	0.00023504	175.51	12360000000	171730	346660	381150	90273	258930	211310	221820	173800	175920
AAASTDYYK	9	0	988.45	Q5F426;A0A1D5PEH3	Q5F426	243	251	yes	2	0.00043816	175.44	1294600000	144530	194810	212790	73308	114350	106340	197160	145530	173630
NAVITVPAYFNDSQR	15	0	1693.84	F1NZ86;Q5ZM98	F1NZ86	190	204	yes	2;3	4.51e-29	175.34	359270000	0	0	0	0	0	0	129500	126320	112900
DIPGLTDTTVPR	12	0	1283.67	Q9PTD6;P47838;F7BYQ2	Q9PTD6	118	129	yes	2;3	4.07e-14	175.33	3397400000	119450	161310	185870	103270	183420	149750	136480	97323	110030
IQHELEEAEERADIAESQVNK	21	1	2437.17	A0A1D5P525;Q9DGM4;A0A1D5P603;A0A1D5PUR6;A0A1D5NVW6;Q90900;A0A1D5NYC2;F1P3X1;P02565;P13538;Q9DGM5;R4GIG1	P13538	1902	1922	no	3;4;5	8.88e-65	175.33	5206600000	83972	62746	49720	81965	217250	130350	36399	45308	30657
ANSACAALDK	10	0	1019.47	A0A1D5P603;A0A1D5NZY9;Q8UWA0;P79793	A0A1D5P603	1439	1448	no	2;3	1.16e-05	175.33	55309000000	392720	705790	634070	209800	572690	211360	1059000	250950	226780
VDIHCEDAEDGTCK	14	0	1647.65	Q90WF0	Q90WF0	2025	2038	yes	2;3;4	7.66e-34	175.29	13074000000	157760	236290	259600	115480	261550	235570	317150	208070	211710
ELTPQVVSAAR	11	0	1169.64	P12003;F1NYY0	P12003	670	680	yes	2	1.63e-15	175.25	1080900000	90107	92447	98497	48616	82631	63953	214170	152020	161270
SSLSFSCDPGYSLVGSR	17	0	1817.83	A0A1D5PNU2	A0A1D5PNU2	128	144	yes	2	2.43e-39	175.21	118920000	0	0	0	5771.1	15482	16533	23329	20474	20178
ASDAGPVFTPPVK	13	0	1284.67	F1P0N2	F1P0N2	180	192	yes	2;3	5.37e-16	175.15	7018900000	158430	257040	252500	38675	88155	76797	153170	112610	121510
VRELEGEVDAEQK	13	1	1500.74	A0A1D5P525;Q9DGM4;A0A1D5P603;A0A1D5NVW6;A0A1D5NYC2;F1P3X1;P02565;Q9DGM5;R4GIG1	A0A1D5NYC2	1822	1834	no	2;3;4	8e-21	175.15	28848000000	158930	365940	232070	113030	359330	297170	679600	171510	132200
SEGVYCCGPAPVK	13	0	1422.63	O13265;Q01841;E1BY44	O13265	366	378	yes	2;3	1.77e-20	174.98	348240000	13698	32701	21604	0	0	0	179400	106900	116840
IEELNAEQYR	10	0	1263.61	F1NX83;A0A1D5PF87	F1NX83	377	386	yes	2	4.81e-06	174.98	22383000000	248980	433110	426850	252300	639740	476560	508820	395250	432870
CEISENVEGK	10	0	1163.51	A0A1D5PCL3;A0A3Q3AWG5;A0A3Q3A8C1;A0A1D5PBR5;E1C5Z5;A0A3Q2UBY4;A0A1D5PE78;A0A1D5PHW7	A0A3Q2UBY4	451	460	no	2;3	4.81e-06	174.98	10486000000	178490	519240	289280	197410	407130	648790	256780	175860	186580
LQTENGELSR	10	0	1145.57	A0A1D5NZY9;Q8UWA0;P79793	A0A1D5NZY9	1288	1297	no	2	4.81e-06	174.98	1018800000	0	0	0	20737	172870	26238	66978	55846	55536
GECSDYATLDVTGGDYTTYSSQR	23	0	2545.06	P79757	P79757	220	242	yes	2;3	3.53e-74	174.91	6113500000	101190	136940	144960	75085	139740	114520	112640	76910	88367
FTSVPDSMTMVLAQHNTK	18	0	2005.96	A0A3Q2UHZ2	A0A3Q2UHZ2	347	364	yes	3	3.63e-51	174.87	1729300000	59222	77816	98118	29966	27602	47060	40195	40282	48016
LVIDDVRPEDEGDYTFIPDGYALSLSAK	28	1	3097.51	P16419	P16419	487	514	yes	3;4	9.05e-92	174.86	11381000000	112790	237980	191670	176930	205030	253400	113110	376930	338350
EFAPNEVTDIWK	12	0	1447.7	A0A1D5P0B5	A0A1D5P0B5	559	570	yes	2;3	1.88e-13	174.84	3439100000	66268	138940	133440	79232	142880	157810	71453	69577	63734
AVTLDESGGGLQTPGGTLSLVCK	23	0	2259.14	A0A3Q2TX22;A0A3Q2U4V6	A0A3Q2TX22	1	23	no	3	2.16e-112	174.82	0	0	0	0	0	0	0	0	0	0
FLSQPFQVAEVFTGHMGK	18	0	2022	Q5ZLC5;A0A1L1RY04	Q5ZLC5	468	485	yes	3	3.66e-51	174.78	588580000	0	0	0	0	0	0	39689	45817	46956
AGTQIENIEEDFRDGLK	17	1	1933.94	P05094;A0A1D5PF13;A0A1D5P9P3;A0A1D5P522;Q5ZIW4;A0A1D5PBQ2;Q5ZJN7	P05094	49	65	yes	3;4	1.16e-39	174.78	1737400000	83421	73325	77350	0	0	0	270360	244130	249090
EGGALPAEVQTR	12	0	1226.63	P16419	P16419	869	880	yes	2;3	2.75e-19	174.77	144290000000	434530	525170	575350	486280	958870	697290	917720	664520	797480
SEEQMLSSESPSLK	14	0	1550.71	A0A3Q2UB77;A0A1L1S103	A0A3Q2UB77	990	1003	yes	2	1.27e-21	174.73	434290000	37678	55874	54523	13113	35218	27539	37924	27371	32159
TGDFQLHTNVNDGSEFGGSIYQK	23	0	2513.15	F6T197;Q9I9D1	Q9I9D1	175	197	no	3;4	3.6e-74	174.71	1949800000	85496	171130	174650	17338	33939	49799	150260	153610	158910
GVPPLIENDHHLNCIR	16	0	1882.95	F1NX83;A0A1D5PF87	F1NX83	270	285	yes	3;4	1.21e-50	174.65	4561400000	12115	16073	17627	62109	135190	105460	45955	49562	46899
VRELEGEVDSEQKR	14	2	1672.84	A0A1D5PUR6;P13538	P13538	1822	1835	no	3;4	1.75e-21	174.62	21799000000	129310	174920	180060	90512	234820	104370	220890	228120	167480
DDEGLYTLR	9	0	1080.51	F1NNW0;Q02173;A0A1D5PKV3	F1NNW0	336	344	yes	2	0.00017875	174.52	36455000000	241110	382640	407270	177870	287230	403510	379410	335510	356920
YVGDITSDNK	10	0	1110.52	A0A3Q3A4C6;A0A1D5NY50;Q9DEH4	A0A3Q3A4C6	1435	1444	no	2;3	3.67e-06	174.48	17743000000	497870	697010	762410	254240	482330	351000	674170	475670	564710
ELHLNNNELVR	11	0	1349.71	P28675;A0A1L1RX77	P28675	271	281	yes	3	6.41e-16	174.42	4382200000	52540	60548	78716	57232	78356	88360	104490	92824	100020
NDSGQYPLSAK	11	0	1178.56	A0A3Q2TS15	A0A3Q2TS15	567	577	yes	2;3	2.23e-09	174.42	8473100000	87086	293790	263770	65427	291070	208480	490790	350650	359680
YETQPVCADLQGK	13	0	1507.7	A0A1L1RNV8	A0A1L1RNV8	186	198	yes	2;3	1.98e-19	174.42	657450000	0	0	0	44174	104820	103350	67578	42490	50583
LQLELNQIK	9	0	1097.64	A0A1D5NYC2;P13538	P13538	1564	1572	no	2;3	1.43e-11	174.41	173360000000	1325800	2352500	2572600	625460	1213700	1038200	1720500	2011400	1907400
AEDTATYYCAK	11	0	1291.54	A0A3Q2UD70;A0A3Q3AZS4;A2N887	A0A3Q2UD70	88	98	no	2;3	2.23e-09	174.41	1480600000	107280	107460	112640	131450	156690	193670	182690	92727	92119
LQLELNQVK	9	0	1083.63	A0A1D5P525;Q9DGM4;A0A1D5P603;A0A1D5PUR6;A0A1D5NVW6;F1P3X1;Q9DGM5	A0A1D5PUR6	1565	1573	no	2;3	0.00012389	174.41	91543000000	234310	878640	519090	95364	243080	405840	1280000	643210	623050
FVEGLPINDFSR	12	0	1392.7	Q5ZME2;A0A452J7S4	Q5ZME2	299	310	yes	2;3	4.45e-14	174.4	3661300000	131430	218250	223010	10720	22039	20387	196580	195310	194050
VIPELNGK	8	0	868.502	P00356;F1NH87;A0A3Q2UM28	P00356	218	225	yes	2;3	0.0020284	174.27	244030000000	647310	739540	312860	383370	1057200	918840	1867500	1776300	1683300
QLEDELAAMQK	11	0	1274.62	H9L3K0;H9L074	H9L3K0	38	48	yes	2;3	4.28e-11	174.1	1776000000	0	0	0	42121	296150	35574	113290	108050	114100
QEVEDLINEK	10	0	1215.6	A0A3Q2TWS9;F1NJ23	A0A3Q2TWS9	1218	1227	yes	2;3	5.22e-06	174.1	1876400000	131590	225140	225600	80826	197730	147490	282340	187300	180950
GYTTDESTLSSVQGSR	16	0	1686.77	Q5F3S6	Q5F3S6	395	410	yes	2	5.9e-24	174.05	585340000	13711	14165	14442	15710	25516	22102	34984	23445	23037
MIEGVFYEMR	10	0	1273.58	P16419	P16419	695	704	yes	2;3	1.46e-09	174.02	6648600000	132800	306090	196630	340740	318760	387560	100050	304990	247550
YTMELFDGK	9	0	1102.5	F1N9Z6;A0A1D5PSF9;Q90724	F1N9Z6	1435	1443	yes	2;3	0.00033414	174.02	5401800000	152890	311880	347560	53630	123290	133860	201970	202510	216520
DIQIQVMGK	9	0	1030.55	E1BZ03	E1BZ03	402	410	yes	2	0.00047174	174.02	193230000	30693	59990	57868	0	0	0	117390	83053	84763
ATNQAGVGRPSDTTDPVVAETR	22	1	2241.1	F1N9Z6;A0A1D5PSF9;Q90724	F1N9Z6	1023	1044	yes	3	2.64e-76	174.01	3565500000	57941	67454	79739	32154	57486	50983	108470	83832	102040
FEENTLDGR	9	0	1079.49	Q5ZIR7;A0A1D5PPQ2	Q5ZIR7	72	80	yes	2	0.00034207	173.75	410710000	36870	22678	26383	24546	26879	21756	27972	17947	20220
SYDLQSQIK	9	0	1080.55	A0A3Q3A4C6;A0A1D5NY50;Q9DEG5;Q9DEH4	A0A3Q3A4C6	978	986	no	2;3	0.00034207	173.75	14520000000	161240	337050	374870	106910	299220	269380	309520	266550	277280
IADPEELQR	9	0	1069.54	A0A3Q2UAY3	A0A3Q2UAY3	5	13	yes	2	0.00053818	173.73	1572900000	54220	58793	55983	69314	119920	88333	80262	54326	54390
GAGTDEGCLIEILASR	16	0	1660.81	A0A1D5PTL7;A0A3Q3A3V5;A0A3Q2TRS6	A0A1D5PTL7	97	112	yes	2;3	6.33e-25	173.72	71051000	0	0	0	20919	22083	30110	0	0	0
AHTTTSNTVNK	11	0	1172.58	Q90885;Q90838	Q90885	82	92	no	2;3	8.51e-10	173.71	1341400000	103470	45790	61153	26395	24646	28655	38499	19534	23432
YLIVNATQPESK	12	0	1361.72	Q5ZLQ6	Q5ZLQ6	104	115	yes	2	2.14e-13	173.71	125410000	13854	29648	34194	0	0	0	32808	24589	22061
SVIQSITPQQQK	12	0	1355.74	F1NSC1	F1NSC1	433	444	yes	2;3	2.14e-13	173.71	2880000000	99475	159990	183990	56646	138000	108550	171690	122570	130250
NNIEDIPSDYFK	12	0	1453.67	A0A1D5PAN0	A0A1D5PAN0	299	310	yes	2;3	4.74e-14	173.71	1216900000	131990	174510	264810	144660	163430	244590	167190	117740	116710
DVNAAIATIK	10	0	1014.57	A0A1D5NW27;P02552;A0A1D5P198;A0A1D5NXV1;A0A1L1RJP8;F1NW97;P09644;F1NWX0	A0A1D5NW27	327	336	no	2;3	9.7e-06	173.71	7439900000	112280	249260	259680	50981	149850	118700	444440	374340	361080
SLEGSEDAVLLQR	13	0	1415.73	A0A3Q2UPH9;A0A3Q2TWR1;A0A3Q2TUU4;A0A3Q2U719;F1NS97;A0A3Q3ABK2;A0A3Q2U0M3;A0A3Q2UJC3;A0A1D5PC47;A0A3Q2U000;P11533	P11533	2762	2774	no	2;3	1.39e-15	173.64	646800000	19543	15291	16988	35511	49586	44181	93812	64338	73442
HSNDVQSELK	10	0	1155.55	A0A3Q3A4C6;A0A1D5NY50;Q9DEG5;Q9DEH4	A0A3Q3A4C6	593	602	no	2;3	5.41e-06	173.64	27823000000	224570	356390	444570	210670	479580	518600	343420	276690	292740
LFAVAPSEDVYEQGLR	16	0	1792.9	A0A1D5PLK4;P15988	A0A1D5PLK4	187	202	yes	2;3	1.92e-14	173.6	1031200000	76832	88104	100580	18233	30629	30379	133800	129440	119540
SYQDPSNAQFLDDIR	15	0	1767.81	Q5ZK10;A0A452J7Z5;A0A1L1RX58	Q5ZK10	199	213	yes	2	5.36e-29	173.59	1026800000	30538	45653	50753	7033.4	14891	15370	86047	70414	77395
HFDQSYR	7	0	951.42	F1NNW0;Q02173;A0A1D5PKV3	F1NNW0	15	21	yes	2;3	0.0029973	173.59	29447000000	141540	199600	213070	104640	143630	186970	109980	138210	132460
YSTQVSDK	8	0	926.435	A6BM71;A6BLM5;Q08476;A6BM73	A6BM71	4759	4766	yes	2;3	0.0020355	173.48	14637000000	54428	273030	206080	142750	360490	287400	438790	281030	342280
VEFMDDTSR	9	0	1098.47	A0A3Q2U825	A0A3Q2U825	32	40	yes	2	1.05e-22	173.48	77743000	0	0	0	0	0	0	32353	20210	24514
YLAEVATGEK	10	0	1079.55	Q5F3W6;F1NMY1;A0A3Q2U4C6	Q5F3W6	133	142	yes	2;3	5.48e-06	173.39	5791900000	242400	559930	608300	261120	730160	636160	409510	306680	325910
IAAANGIGR	9	0	841.477	F1NN63;Q2UZR2	F1NN63	77	85	yes	2	0.00046022	173.38	6850800000	603080	652160	245580	22389	60042	59668	78958	88927	87968
ATEGDKGVYECSCGTDK	17	1	1875.76	A6BM71;A6BLM5	A6BM71	5960	5976	yes	3	1.36e-39	173.37	3492500000	106100	219070	161390	55991	268550	78438	406350	196710	180510
DLLLDPAWEK	10	0	1198.62	Q90734;A0A1D5NXS9;A0A1D5PIX0;P05094;A0A1D5PF13;A0A1D5P9P3;Q5ZIW4;A0A1D5PBQ2;Q5ZJN7;R9PXQ0;P20111;A0A1D5PNV5	R9PXQ0	32	41	no	2;3	3.24e-09	173.32	37712000000	357340	872130	892640	210690	335380	599180	404990	542550	557860
GTEGSLSNCK	10	0	1051.46	Q98TD1;A0A1L1S0P1	Q98TD1	100	109	yes	2;3	3.45e-06	173.32	4862500000	252620	251830	274290	189900	336620	252320	344850	189800	188310
STAELYLVTK	10	0	1123.61	A6BM71;A6BLM5;Q08476;A6BM73;A6BLM8	A6BM71	4886	4895	no	2;3	1.04e-05	173.32	10894000000	328650	558100	529380	95661	217180	218200	681540	615860	601920
APTYTSDR	8	0	909.419	A0A3Q2U6J3;A0A3Q2TWH3;A0A3Q3APP3;F1NZL2;A0A3Q2U3L9	A0A3Q2U6J3	1708	1715	yes	2	0.0020609	173.28	588670000	92856	109770	106190	35207	68251	52213	26052	16907	18051
EDIGTGTTIEK	11	0	1162.57	A0A3Q3A4C6;A0A1D5NY50	A0A3Q3A4C6	2510	2520	yes	2;3	1.86e-08	173.24	6623100000	174130	506830	377050	161380	417200	591060	454050	242380	303890
GAIGMSLIK	9	0	888.51	A0A3Q8WI14	A0A3Q8WI14	112	120	yes	2;3	0.00037632	173.23	9020300000	111980	160440	162000	177050	282700	251440	248220	207160	190500
ELTLDDFK	8	0	979.486	A0A1D5PBY3;A0A1D5PNR4	A0A1D5PBY3	62	69	yes	2	0.0027096	173.23	5515100000	221040	362510	404330	209530	466730	441220	307760	220680	256830
GEFGVYLVSDGSSR	14	0	1471.69	A0A1D5PBM6;A0A1D5P3B3	A0A1D5PBM6	703	716	yes	2;3	1.53e-21	173.04	533520000	0	0	0	38841	51794	48383	0	0	0
PSKPTDDIQAIDAK	14	1	1497.77	A6BM71;A6BLM5	A6BM71	7909	7922	yes	2;3;4	7.34e-22	172.99	5528100000	147320	417220	518480	66965	278290	308660	159690	152890	145330
LEEAGGATSAQLEMNK	16	0	1647.78	A0A1D5NZY9;Q8UWA0	A0A1D5NZY9	1158	1173	no	2;3;4	1.84e-39	172.99	38364000000	512040	729650	977320	347290	875820	593550	785290	725610	724840
HTNYTMEHIR	10	0	1300.6	Q90734;A0A1D5NXS9;A0A1D5PIX0;P05094;A0A1D5PF13;A0A1D5P9P3;A0A1D5P522;R9PXQ0;P20111;A0A1L1S0L2;A0A1D5PNV5	R9PXQ0	715	724	no	2;3;4	3.67e-06	172.98	42587000000	174630	262480	322220	245700	443080	419120	211370	329960	313860
LCYVTNNSSR	10	0	1212.56	Q5F4B1;F1NAX3	Q5F4B1	59	68	yes	2	5.58e-06	172.98	540860000	21059	30794	32354	13458	27448	22894	37138	31536	31240
LQDYSALEK	9	0	1065.53	A6BM71;A6BLM5	A6BM71	5906	5914	yes	2	0.000349	172.98	1265000000	84839	164380	201710	56961	125490	129310	57742	42140	47908
NATQILNEK	9	0	1029.55	A0A3Q3A4C6;A0A1D5NY50;Q9DEH4	A0A3Q3A4C6	2355	2363	no	2;3	0.00043155	172.98	15789000000	194610	525580	500620	164430	478570	410730	548940	412660	414680
DLTIEPSFK	9	0	1048.54	A0A3Q2TS15	A0A3Q2TS15	3743	3751	yes	2;3	0.00034937	172.94	28742000000	372440	661110	656550	215150	532390	419430	514330	355790	367530
TKDNIVEITGK	11	1	1216.67	F1P593;Q00649	F1P593	112	122	yes	2;3	7.02e-15	172.92	24019000000	106130	307710	311330	46037	182660	182720	196750	144790	150750
HPECFVCSDCNLNLK	15	0	1891.8	F1NHA9;Q9PU47;A0A3Q2UH56	F1NHA9	313	327	yes	2;3	2.63e-21	172.92	5026400000	128700	245900	261830	77665	135070	178970	239560	273150	264730
EAGPPIVVASGLK	13	0	1236.71	E1C645	E1C645	62	74	yes	2;3	2.22e-20	172.92	338800000	0	0	0	0	0	0	143990	105290	117610
LPPNVVAEPDLVK	13	0	1389.79	A0A3Q8WI14	A0A3Q8WI14	69	81	yes	2;3	2.22e-20	172.92	27576000000	560170	909370	885900	170410	378450	319800	821610	628220	632380
VAESGYDLSLPNEMK	15	0	1651.78	A0A3Q2UB77;A0A1L1S103	A0A3Q2UB77	875	889	yes	2;3	6.92e-21	172.92	2029300000	134890	213510	196700	81921	197080	167340	193250	138010	140260
LEAPDADELPR	11	0	1224.6	Q8AYI3;Q5ZMW1	Q8AYI3	526	536	yes	2;3	2.54e-09	172.88	4201900000	88388	95490	121290	62109	103020	102290	117240	76805	98591
EQYEEELEAK	10	0	1266.56	F1P3X1	F1P3X1	1351	1360	no	2;3	5.63e-06	172.8	11987000000	9412	102960	43917	20307	144530	276900	177080	42738	99459
YTCYASNEVGK	11	0	1290.56	A6BM71;Q08476	A6BM71	4194	4204	yes	2;3	2.56e-09	172.8	10394000000	94635	214100	227400	75915	236710	182640	250240	212780	214020
GSAAAAQAAPTAAK	14	0	1184.61	A0A1L1RNL6	A0A1L1RNL6	945	958	yes	2;3	1.58e-20	172.76	1207100000	17181	22972	19546	29759	64109	43334	72886	51887	61506
AQLAGAGTVSGR	12	0	1086.58	A0A1D5NUR5	A0A1D5NUR5	260	271	yes	2	1.45e-13	172.61	338430000	0	0	0	23136	46333	39046	58942	43469	45482
LITPAVVSER	10	0	1083.63	F1NU56	F1NU56	67	76	yes	2	5.68e-06	172.59	885300000	142440	193090	217040	121040	218660	160140	304550	271980	298900
TEELEEAKK	9	1	1075.54	A0A1D5P525;Q9DGM4;A0A1D5P603;A0A1D5PUR6;A0A1D5NVW6;A0A1D5NYC2;A0A1D5P600;Q90WH5;A0A1D5PFB7;A0A1D5NXZ4;F1P3X1;P02565;P13538;Q910C5;Q90767;Q9DGM5;R4GIG1;A0A1D5NZY9;Q8UWA0;P79793;Q91411	P13538	1386	1394	no	2;3;4	0.00030585	172.47	205360000000	195540	853740	833940	179600	1133200	774740	1095300	763450	771090
LESLFSDSQR	10	0	1180.57	E1BZ03	E1BZ03	18	27	yes	2	5.76e-06	172.28	408430000	49226	73316	82116	40909	58658	62086	86500	73173	76365
QITINDLPVGR	11	0	1224.68	P0CB50;A0A1D5P719	P0CB50	141	151	yes	2	2.67e-09	172.27	4646000000	30719	47491	49913	49979	102500	101670	43377	40101	35638
TVGGDQTGPR	10	0	986.478	A0A1D5PRT3	A0A1D5PRT3	87	96	yes	2	1.42e-05	172.25	1778800000	23571	35206	36721	28577	68115	57926	40951	28936	29946
DQNECEEGIHDCDSK	15	0	1834.67	F1NII7	F1NII7	2239	2253	yes	3	1.64e-29	172.24	4299700000	18200	37871	40540	17300	40321	41383	80856	55485	55108
FHVEEEGKGK	10	1	1158.57	F1NU17;P51903	F1NU17	124	133	yes	2;3;4	3.3e-06	172.23	18961000000	661480	1175500	1136100	137340	406010	383160	407550	654590	449470
LQVAGEITTGPR	12	0	1240.68	A0A1D5PP62;A0A1D5PSJ5;F1P3D8;Q5ZIF4;F1P3D9;A0A1D5PT81	A0A1D5PP62	455	466	no	2	2.41e-11	172.21	701700000	0	0	0	80950	151450	150960	146470	114090	130960
LVDYDSAR	8	0	937.451	F1NZ04;Q5ZLU2;Q5ZKL7;A0A1D5PUG8;A0A1D5PFS4;P50478;A0A1D5P266	F1NZ04	147	154	yes	2	0.002213	172.15	8554400000	130100	180690	179010	65985	125280	117150	146670	111090	115660
GEIAGPPDTPYEGGR	15	0	1514.7	Q5ZIL3;A0A1L1RJI2	Q5ZIL3	41	55	yes	2	6.49e-29	172.13	1709000000	31343	26141	30094	28192	39660	28270	31130	22316	23992
SQWINEK	7	0	903.445	A0A1D5P470	A0A1D5P470	43	49	yes	2	4.52e-09	172.11	0	0	0	0	0	0	0	0	0	0
DINQEVYNFLSTAGAK	16	0	1768.86	Q8AYI3;Q5ZMW1	Q8AYI3	147	162	yes	2;3	3.35e-24	172.1	1977500000	55583	122780	152770	17225	36772	56745	80467	97290	96031
YHAAVLTNNEEWEK	14	0	1702.8	F1NSZ4	F1NSZ4	382	395	yes	3	4.4e-22	172.09	307850000	21132	40469	40711	0	0	0	30035	31187	31489
FTAVEDQFYCVECYK	15	0	1957.82	A0A3Q2TXL5;F1NED9	A0A3Q2TXL5	201	215	yes	2;3	4.11e-21	172.09	803620000	43190	114510	68445	105720	204740	482850	0	0	0
QFLECAQNQTDLK	13	0	1593.75	A0A1L1RVP3;Q5ZK39	A0A1L1RVP3	117	129	no	2;3	1.41e-19	172.09	321780000	28467	52285	50682	30623	47020	53774	81968	69607	70276
AADVHAVR	8	0	837.446	A0A1D5P9V0;P00548;F1NW43	A0A1D5P9V0	267	274	no	2;3	0.00075303	172.03	331400000000	1129300	1030300	1151800	684720	915940	929060	1363400	1052400	1209600
NPCYTGTHNCDTNAVCR	17	0	2038.8	A0A1D5PJ08	A0A1D5PJ08	578	594	yes	3	9.12e-40	171.98	2258400000	24635	38700	38306	12237	32280	33946	79217	43538	39169
IEAQNKPFDAK	11	1	1259.65	A0A1D5P525;Q9DGM4;Q7LZS7;A0A1D5P603;Q90910;A0A1D5PUR6;Q90914;A0A1D5NVW6;Q90913;A0A1D5NYC2;Q90909;F1P3X1;Q90908;P02565;P13538;R4GIG1	P13538	26	36	no	2;3;4	1.32e-08	171.92	161260000000	452050	1347300	1284500	487270	1533500	1837900	1385300	1044700	1277500
TIIPLISQCTPK	12	0	1369.76	E1BVT3	E1BVT3	203	214	yes	2	5.74e-14	171.92	1517300000	96565	193800	185190	0	0	0	140730	79518	89239
EGCEVGFIPSPVK	13	0	1417.69	A0A3Q2TTX7;A0A3Q2UP73;A0A3Q2TSS1;A0A3Q3AZX6;A0A3Q2UL05;R4GIU6	A0A3Q2TTX7	107	119	yes	2;3	1.12e-15	171.92	1043700000	89069	161820	166920	43292	100150	78494	278110	240250	231420
TSYAQHQQVR	10	0	1216.59	F2Z4K7;A0A1D5PY92	F2Z4K7	153	162	yes	2;3	1.51e-06	171.87	3816400000	24712	48801	52770	31955	77861	72256	75562	62614	71462
VLSQIDVAQK	10	0	1099.62	A0A3Q2UPH9;A0A3Q2TWR1;A0A3Q2TUU4;A0A3Q2U719;F1NS97;A0A3Q3ABK2;A0A3Q2U0M3;A0A3Q2UJC3;A0A1D5PC47;A0A3Q2U000;P11533	P11533	1442	1451	no	2	5.87e-06	171.85	241030000	34669	61681	67064	8270.6	18242	18210	0	0	0
AVLETQAGQLR	11	0	1184.65	F1NGM2	F1NGM2	18	28	yes	2	7.35e-09	171.85	109960000	26589	26247	28787	0	0	0	0	0	0
EGPNQFQNCAK	11	0	1291.56	E1C6C9	E1C6C9	117	127	yes	2	2.75e-09	171.85	348970000	13754	18548	17571	17124	54196	39973	67343	40371	46871
VDGGHYTLNLK	11	0	1215.62	A0A3Q2TS15	A0A3Q2TS15	4210	4220	yes	2;3	2.79e-09	171.85	444020000	147330	152040	201770	0	0	0	29376	21516	33451
DGTSWVACPR	10	0	1147.51	A0A3Q2UJ85;P10184;F1NMN2	A0A3Q2UJ85	17	26	yes	2	5.9e-06	171.73	467050000	66168	83630	76103	0	0	0	126250	90225	95332
MINDLNAQR	9	0	1073.53	A0A1D5PUR6	A0A1D5PUR6	1273	1281	no	2	0.00036026	171.73	24552000000	144460	1523300	561950	158740	529240	2063600	107230	49430	55503
IMNTFSVVPSPK	12	0	1318.7	F1NYB1;P09206;P09207;P09244	F1NYB1	163	174	no	2	3.44e-11	171.67	355030000	0	0	0	20488	42318	46131	175090	147670	128920
YFDEISQDTGK	11	0	1301.58	A0A1L1RX26	A0A1L1RX26	290	300	yes	2;3	2.8e-09	171.62	588140000	67169	97037	95564	43977	79071	73723	88185	60946	58312
TLDPDDMVYCGIYDNALDNDNYNVAR	26	0	3035.29	F1NX83;A0A1D5PF87	F1NX83	1414	1439	yes	2;3	2.87e-115	171.58	9351300000	98022	175840	208100	100420	180300	202150	132820	130350	139110
EASDPQPEDTESALK	15	0	1615.72	P13127;Q5ZLP3	P13127	104	118	yes	2;3	2.91e-21	171.57	5870000000	68335	140240	141330	53619	133980	111910	99209	59056	71455
EELLATSDGDIWNNSR	16	0	1818.84	A0A3Q2UB77;A0A1L1S103	A0A3Q2UB77	234	249	yes	2;3	1.29e-38	171.57	350880000	0	0	0	49477	114650	79371	79319	67671	63494
CVVVGDGAVGK	11	0	1059.54	Q90694;A0A3Q2TUW7;A0A1D5PD33;Q5ZMG8;F1NFW9;Q7T1C4;F1NK52;R4GMA6	Q90694	6	16	no	2	1.47e-08	171.56	1342600000	59271	118430	119190	37095	84083	67045	191830	131530	132340
TCNPSDILQMCSFLEGK	17	0	1998.88	Q4ADJ7;Q4ADJ6;Q4ADG4;P02789	Q4ADJ7	689	705	yes	2;3	2.22e-51	171.56	1338200000	75152	160970	145550	0	0	0	112420	80979	80369
AQYESIAAK	9	0	979.497	E1BZ05;P02542;O73665	E1BZ05	271	279	yes	1;2;3	0.00024209	171.56	11991000000	276870	403360	435910	197960	381630	334290	344360	228320	211850
YIDQEELNK	9	0	1150.55	A0A1D5PHC5;F1NC33;Q04619	A0A1D5PHC5	277	285	yes	2	0.00049547	171.56	430100000	18510	17743	32877	52984	157780	175320	18980	14964	21495
ENQEYNFR	8	0	1098.47	A0A3Q2TS15	A0A3Q2TS15	4506	4513	yes	2	0.0022949	171.53	8079000000	277690	385700	371030	178630	316680	374050	211050	182730	191870
DLTVEEEQSMMHQPDK	16	0	1915.83	F1NX83;A0A1D5PF87	F1NX83	435	450	yes	3;4	3.34e-39	171.46	28049000000	360570	353520	395560	296410	451240	401160	477560	331190	418260
VEVPVSGR	8	0	841.466	A0A3Q2TS15	A0A3Q2TS15	2685	2692	yes	2	0.0023145	171.38	30615000000	100430	141940	154200	118960	224620	176140	285070	217470	232470
DVHVVEGTK	9	0	982.508	A6BM71;Q98918;Q9YH41	A6BM71	2180	2188	no	2;3	0.00036693	171.36	13775000000	252400	473040	500720	260220	568190	560850	389980	305860	341140
NTVTVTWK	8	0	947.508	A0A3Q2TS15	A0A3Q2TS15	22	29	yes	2;3	0.0011795	171.36	6143400000	91578	236920	232690	55045	149890	138380	334620	281920	265730
GQLSEPYGK	9	0	977.482	A0A1D5PUM7;E1C7I7	A0A1D5PUM7	500	508	no	2	1.35e-22	171.36	2141000000	99943	156130	173240	0	0	0	50674	55680	53038
NSVEIGADPK	10	0	1028.51	P16419	P16419	1075	1084	yes	2;3	6.01e-06	171.33	94958000000	249690	795590	789080	216360	914310	641900	717540	532870	553400
YASICQQNGIVPIVEPEILPDGDHDLKR	28	1	3175.6	R4GM10	R4GM10	174	201	yes	3;4;5;6	1.11e-77	171.3	80598000000	290940	371140	223770	54582	91958	127860	250100	615000	474840
ENNPALGIDCLQK	13	0	1470.71	Q5F411;A0A1L1RZE8	Q5F411	484	496	yes	2;3	5.66e-17	171.29	685860000	61609	132500	138980	15882	38069	30568	92287	65090	62184
YVENPQTQLEEGVSQLR	17	0	1988.98	F1NNV7;A0A1D5NXD7	F1NNV7	51	67	yes	2;3	9.92e-40	171.26	1628700000	40095	30003	35498	57374	50640	50973	51141	41495	48680
QILAGEYDHLPEQAFYMVGPIEEAVAK	27	0	3017.48	Q5ZLC5;A0A1L1RY04	Q5ZLC5	498	524	yes	3;4	1.9e-77	171.22	1216100000	24234	40178	29438	55053	60839	77747	23439	56569	47021
ESLLSYEHHASSEEK	15	0	1744.79	P79757	P79757	290	304	yes	3;4	2.77e-29	171.21	2384800000	104180	94088	106960	117210	115830	141990	0	0	0
LYQIPFEMPECDGESEPR	18	0	2195.95	A0A3Q2UCF9;A0A1D5PS00	A0A3Q2UCF9	242	259	yes	2;3	3.13e-47	171.21	6519700000	178830	295320	291440	197330	356540	332020	382130	299430	279080
DKTDDQVTIDSALATK	16	1	1719.85	Q5ZL82;A0A1D5P8I7	Q5ZL82	90	105	yes	2;3	6.25e-39	171.09	3196000000	52022	98269	100200	37354	109380	88884	128970	83169	85880
LEQQVDDLESSLEQEKK	17	1	2016.99	A0A1D5PFB7;A0A1D5NXZ4;Q910C5;Q90767;A0A1D5NZY9;Q8UWA0	A0A1D5NZY9	1035	1051	no	3;4	9.86e-40	171.09	541110000	0	0	0	11164	34964	17998	35824	30417	28312
AAVEEGIVPGGGCALLR	17	0	1667.87	Q5ZL72	Q5ZL72	430	446	yes	2;3	2.97e-19	171.05	2478400000	92540	117070	139540	40287	69051	64294	125130	112440	112330
LDVAPVSDIIEIK	13	0	1410.8	A0A1D5PC99;Q5ZIX2;F1N9U8	A0A1D5PC99	117	129	yes	2;3	3.26e-16	171.05	496810000	34579	58287	53205	65890	129730	152060	136360	138980	142080
GALGSQCVQYFK	12	0	1356.65	Q5ZKQ2	Q5ZKQ2	14	25	yes	2	1.33e-11	170.99	120760000	17614	24711	33192	0	0	0	27225	24083	26575
DVPLPEVAFVK	11	0	1212.68	Q5ZJV5	Q5ZJV5	45	55	yes	2;3	2.93e-09	170.99	6003200000	377890	590190	625520	227900	527190	522580	359700	262670	316100
ANAACAALDK	10	0	1003.48	A0A1D5P525;Q9DGM4;A0A1D5PUR6;A0A1D5NVW6;F1P3X1	A0A1D5PUR6	1439	1448	no	2;3	9.61e-18	170.99	32662000000	106290	629820	253240	116400	309280	1036200	292680	185120	200790
ITSQDQQGR	9	0	1031.5	P79757;A0A3Q2UNJ2	P79757	966	974	yes	2	4.6e-18	170.95	1426500000	73478	74542	72956	0	0	0	0	0	0
MLHSNQEEPSQPR	13	0	1551.71	F1NHA9;Q9PU47;A0A3Q2UH56	F1NHA9	236	248	yes	2;3	2.62e-32	170.95	18739000000	111750	149550	185700	137430	253710	259030	265440	208420	232610
ELESQITELQEDLESER	17	0	2046.96	P14105;A0A1D5PM19	P14105	1108	1124	yes	3	1.03e-39	170.91	213610000	1632.2	1887.5	2334.6	3128.8	4133.3	4457.2	4010.3	2548.2	2464.6
DGLPAGAGVAGAGLAGAGAVGSPYGK	26	0	2140.09	A0A1D5PUM7;E1C7I7	A0A1D5PUM7	916	941	no	2	5.66e-36	170.91	666610000	0	0	0	0	0	0	11147	11714	12950
AEEPEISQSEAR	12	0	1344.62	R4GIV3	R4GIV3	1609	1620	yes	2	6.32e-14	170.89	263140000	15139	16452	14578	4404.5	7076.3	4364.4	16496	12367	12850
AEGPGLSR	8	0	785.403	Q90WF1	Q90WF1	861	868	yes	2	0.0023835	170.87	5709800000	70193	80098	81999	92052	134100	132230	100160	61504	57585
GLAGPQGPR	9	0	851.461	P02467	P02467	996	1004	yes	2	0.0003694	170.72	12416000000	167200	187130	316600	116660	236670	265670	122210	59909	61582
VADDVTLTSILPTR	14	0	1499.82	Q1G1I6;A0A3Q2TZM7	Q1G1I6	319	332	yes	2;3	8.22e-21	170.68	302670000	77102	99563	109290	52627	76962	83370	0	0	0
PFSSTHNK	8	0	916.44	P00565	P00565	2	9	yes	2;3	0.00071406	170.66	26111000000	139170	136910	228500	94258	87868	75244	277240	176260	240790
HGDTSADPSQQEAK	14	0	1469.64	E1BXI3	E1BXI3	21	34	yes	3	5.14e-22	170.66	2481900000	30019	41902	48916	24972	50840	40272	78101	46439	61508
TLEQQENFEEVAR	13	0	1591.75	A0A3Q2TX57;F1NNX7;A0A1D5PD49;A0A3Q2U103;A0A3Q2UH12;A0A3Q3AGB0;A0A1D5P8M1;A0A1D5PGX3;A0A3Q2UL65;A0A1D5PIW9	A0A3Q2TX57	1267	1279	yes	2	7.89e-16	170.66	198740000	8145.8	15650	10374	4512.4	6069.6	7481.6	10749	3688.7	4344.5
VNLGMNVGK	9	0	930.496	A0A1D5P9V0;P00548;F1NW43	A0A1D5P9V0	509	517	no	2;3	8.23e-07	170.66	127120000000	625480	1077900	1258600	470650	1135000	1016400	920800	702380	723940
VYTDYEITWSDEK	13	0	1647.73	A0A3Q3AHU9	A0A3Q3AHU9	102	114	yes	2	1.18e-16	170.62	111850000	7099	12514	13509	13495	17217	38977	0	0	0
AQEILSDVVYK	11	0	1263.67	A0A3Q3A4C6;A0A1D5NY50;Q9DEG5;Q9DEH4	A0A3Q3A4C6	943	953	no	2;3	6.74e-09	170.62	985450000	46778	61342	63781	112730	193460	236270	251460	227610	251280
FEEPNFEETPK	11	0	1365.61	E1C4V1	E1C4V1	97	107	yes	2;3	3.02e-09	170.52	6757900000	208170	378590	424260	88519	272030	212210	257210	166250	185600
ETTWHTQAEPR	11	0	1354.63	A0A3Q2UCF9	A0A3Q2UCF9	392	402	yes	2;3	3.13e-15	170.52	24157000000	220880	200150	221570	126800	148810	186350	176010	137960	155820
QANELAAAAR	10	0	1013.53	Q9IAY5;A0A452J855;A0A1L1RIX9	Q9IAY5	235	244	yes	2	9.85e-06	170.5	2752300000	126690	114230	120580	83639	146350	124400	208840	137470	148980
MQQNIQELEEQLEEEESAR	19	0	2332.05	P14105;A0A1D5PM19	P14105	941	959	yes	3	2.8e-48	170.5	164960000	0	0	0	0	0	0	3701.3	2119.2	2431.8
EAIEGTYIDK	10	0	1137.56	Q98TH5	Q98TH5	49	58	yes	2;3	1.25e-05	170.47	1598500000	200730	289470	341970	99983	218510	186900	286510	183060	213650
PQNVMVESGR	10	0	1115.54	P16419	P16419	56	65	yes	2	1.25e-05	170.47	3873900000	244290	383150	501600	69661	190220	193660	232380	199300	221830
DGNTMVACPR	10	0	1119.48	A0A3Q2UJ85;P10184;F1NMN2	A0A3Q2UJ85	82	91	yes	2	6.23e-06	170.47	1678000000	71149	104800	100710	37747	86385	78007	133860	88969	97867
GLLLYGPPGTGK	12	0	1171.66	A0A1D5PYL3	A0A1D5PYL3	289	300	yes	2;3	6.56e-14	170.47	1274200000	23561	44860	59137	28524	44911	64920	177160	158100	149680
DWPDAR	6	0	758.335	P00565;A0A3Q2U6M6;A0A3Q2U807;P11009;F1NAD3;P70079;F1NXR0;P05122;F1NZ30;A0A1L1RT82	P00565	210	215	no	1;2	0.0010935	170.43	314530000000	150130	257940	281890	76998	157620	135560	287050	206130	228550
TVNHELEPSTLEAPGASIPK	20	0	2089.07	F1NZ04	F1NZ04	282	301	yes	2;3;4	1.8e-54	170.38	5918500000	95306	141410	149130	55123	111420	101260	204970	133130	141990
IHFGATGK	8	0	829.445	A0A1D5P525;Q9DGM4;A0A1D5P603;A0A1D5PUR6;A0A1D5NVW6;A0A1D5NYC2;A0A1D5P600;A0A1D5PFB7;A0A1D5NXZ4;F1P3X1;P02565;P13538;Q910C5;Q9DGM5;R4GIG1	P13538	253	260	no	2;3	0.00068673	170.32	88597000000	705820	1282800	1550500	404640	641760	810170	802000	854850	848170
FCETTIGCK	9	0	1114.48	A0A3Q8WI14;A0A3Q2TX12;F1NFY2	A0A3Q8WI14	161	169	yes	2;3	1.31e-06	170.24	43522000000	484100	783120	843300	167110	422850	315800	1014200	684630	721920
ILNQSLYK	8	0	977.555	A0A3Q3A4C6;A0A1D5NY50;Q9DEG5;Q9DEH4	A0A3Q3A4C6	561	568	no	2;3	0.002919	170.22	3271200000	133080	236820	278120	113000	248720	209530	167030	127390	129700
GEFIDLFDK	9	0	1082.53	Q6B344;A0A1D5PY67;E1BWX1;P51901	Q6B344	638	646	yes	2	0.0003743	170.18	2620000000	89149	149750	138420	107000	131060	208480	158390	261140	195540
ICDDELILIK	10	0	1230.65	Q5ZMG9;A0A1L1RMM0	Q5ZMG9	359	368	yes	2	6.3e-06	170.18	301870000	42450	75528	71308	43410	56939	67582	117570	151850	143850
DCFTCSQCK	9	0	1204.43	A0A3Q2TXL5;F1NED9	A0A3Q2TXL5	126	134	yes	2;3	0.00011635	170.18	7404400000	41396	378570	109870	76051	419400	558020	220830	95045	100230
VLSGAEVTVGHEEEEGGK	18	0	1825.87	F1NT93;Q5ZM94	F1NT93	176	193	yes	3	1.15e-47	170.11	390490000	0	0	0	0	0	0	104200	59712	70654
AAPQSPVAATPAAPAATK	18	0	1618.87	A0A1L1RNL6	A0A1L1RNL6	518	535	yes	2;3	4.48e-47	170.11	1501600000	137950	193990	220950	46007	70319	65494	192170	151880	173420
VLQNLVSEEDGRPVGTR	17	1	1867.98	F1NHA9;Q9PU47;A0A3Q2UH56	F1NHA9	255	271	yes	2;3	4.97e-40	170.09	14757000000	183100	309640	353280	193830	343120	383310	133280	129760	136020
TGLYNYYDDEAEK	13	0	1579.67	P13731	P13731	227	239	yes	2	3.52e-19	170.07	377250000	15491	39069	41620	4146.9	12201	12360	64904	33463	32888
ASPDAEMAAFGEAAPYLR	18	0	1865.86	A0A1D5NVW6;Q90913;A0A1D5NYC2;Q90909;P13538;Q9DGM5	P13538	2	19	no	2;3	1.61e-150	170.04	598550000000	628300	463690	529340	485300	324120	403400	374620	307120	404010
QAFSPEGEFQR	11	0	1294.59	A0A1D5NT92	A0A1D5NT92	490	500	yes	2	3.13e-09	170.02	2459700000	91438	162970	162610	104940	258060	191110	265260	140540	146390
AESTPEIAEQR	11	0	1229.59	F1NB10;Q5ZLU7	F1NB10	221	231	yes	2;3	1.03e-08	169.99	1440700000	49389	61518	66714	33654	57166	44905	60782	44142	47652
IQEAGTEVVK	10	0	1072.58	E1BVT3	E1BVT3	229	238	yes	2;3	9.46e-06	169.99	21719000000	454110	778510	849730	185010	482910	375800	572470	364270	434880
LTALITPQVSDPMR	14	0	1540.83	Q5ZJQ0;A0A1D5PAA8	Q5ZJQ0	35	48	yes	2	6.99e-14	169.98	503330000	50815	69754	72853	0	0	0	0	0	0
FVIGGPQGDAGLTGR	15	0	1443.75	A0A3Q2U3Q5	A0A3Q2U3Q5	62	76	yes	2	8.16e-29	169.98	146270000	21200	32964	33284	0	0	0	40909	31363	30695
ITHGQFDER	9	0	1101.52	P11009;F1NAD3	P11009	150	158	yes	2;3	1.24e-16	169.93	43747000000	168810	160630	188750	151120	194830	283270	122360	93349	135890
ETEANEEHWR	10	0	1299.55	F1N9Z6;A0A1D5PSF9;Q90724	F1N9Z6	985	994	yes	2;3	5.74e-12	169.93	30281000000	159250	111320	123730	157240	127430	137380	155540	138870	164320
DNLIVDAGGR	10	0	1028.53	A0A1D5PUM7;E1C7I7	A0A1D5PUM7	427	436	no	2	1.29e-08	169.93	6839400000	389760	123900	242220	195400	133190	83170	213100	189690	212690
LYSIQGTSLK	10	0	1108.61	A0A1D5PS16;O93277;F1NRI3	A0A1D5PS16	473	482	yes	2	1.27e-05	169.93	448990000	56464	144100	155250	8350.5	18952	16940	58874	49322	49821
LEDTENWLYEDGEDQPK	17	0	2079.89	A0A1D5PPF8	A0A1D5PPF8	652	668	yes	3	1.14e-39	169.92	924930000	22299	39493	40049	30584	60631	52927	26292	20502	23811
ILAQITGTDHMKEPEHEGAK	20	1	2204.09	A0A3Q2U6G6;A0A1D5P8X3;Q5F3G1;F1NTC8;A0A3Q2UJ04	A0A3Q2U6G6	190	209	no	3;4;5	2.44e-54	169.9	9395300000	106650	279700	383580	30109	45272	78881	126180	215150	182010
SLQFVDWCPTGFK	13	0	1583.74	F1NMP5;F1NMP3;P08070	F1NMP5	337	349	yes	2;3	5.25e-16	169.89	430970000	0	0	0	0	0	0	95165	85650	120700
YVNEFLATALCTQNVNVVEQEK	22	0	2568.25	A0A1D5PSH6	A0A1D5PSH6	68	89	yes	3;4	6.52e-63	169.84	1853200000	59062	126270	123160	11078	22952	36906	74319	102050	79277
SFVSDANCILR	11	0	1280.62	F1N9Z6;A0A1D5PSF9;Q90724	F1N9Z6	1518	1528	yes	2	3.18e-09	169.76	7669600000	28016	60104	61961	32862	76436	73870	135260	125980	128480
TFGGGTSPVFPR	12	0	1221.61	E1BZ05;P02542;O73665	E1BZ05	17	28	yes	2	6.29e-10	169.76	3207800000	21258	43175	56118	20835	40553	64021	56434	51913	39517
QLFEADKDR	9	1	1120.55	F1NIJ6;Q5ZMU3;A0A1L1RQ91;A0A1L1RPE8;A0A1D5PRS4	F1NIJ6	27	35	yes	2;3	0.00019701	169.65	47416000000	309050	642240	747420	163710	311310	457970	409330	570090	519070
LYQQTLLQDGLK	12	0	1418.78	E1C1U8	E1C1U8	8	19	yes	2;3	1.92e-13	169.65	242620000	22306	48265	43681	0	0	0	42189	35297	33575
DDGNAEISGYTVQK	14	0	1495.68	P16419	P16419	949	962	yes	2;3	4.24e-17	169.62	2310100000	70842	137430	150310	54497	122530	114330	87056	67130	81081
NGLMDHDDFR	10	0	1218.51	R9PXQ0;P20111;A0A1L1S0L2	R9PXQ0	773	782	yes	2;3	6.23e-12	169.58	29471000000	369250	324330	289080	239110	250900	363610	527720	576430	563750
VALSPAGVQALVK	13	0	1251.76	E1C6A1	E1C6A1	72	84	yes	2;3	4.05e-39	169.58	0	0	0	0	0	0	0	0	0	0
DPCDPPGQPEVTNITR	16	0	1794.82	A0A3Q2TS15	A0A3Q2TS15	5119	5134	yes	2;3	1.07e-39	169.58	55760000000	260290	339350	351700	174160	333010	234520	392000	276370	290310
TPFETDMLTLTR	12	0	1423.7	A0A1D5PN46	A0A1D5PN46	5	16	yes	2;3	3.55e-12	169.58	15247000000	155210	273010	266120	93345	177960	186580	308800	288730	299470
VQHELDDAEER	11	0	1339.6	A0A1D5NZY9;Q8UWA0;P79793	A0A1D5NZY9	1907	1917	no	2;3	1.27e-09	169.58	3973100000	14826	16544	12709	48653	90251	30215	29683	20825	26664
YVLEEYAAR	9	0	1112.55	F1NNW0;Q02173;A0A1D5PKV3	F1NNW0	27	35	yes	2;3	4.63e-05	169.57	41910000000	292110	401840	385060	210680	341480	415920	272940	249530	238070
LNEIEGTLNSAK	12	0	1287.67	A0A3Q2UAJ4;F1NI05;Q5ZIH4	A0A3Q2UAJ4	1519	1530	yes	2	3.66e-11	169.57	548790000	61378	80929	82973	51633	86184	80155	225150	196780	184420
ELDSITPDVQPGWK	14	0	1583.78	Q5ZMI2;F1P3U1;A0A3Q3AHD7	Q5ZMI2	332	345	yes	2;3	1.21e-14	169.52	331920000	17166	34326	36882	0	0	0	163060	153620	147020
YEPQLPDQWEK	11	0	1431.67	A0A3Q2TWS9;F1NJ23	A0A3Q2TWS9	479	489	yes	2	3.23e-09	169.52	335830000	19727	32058	32601	8506.1	16529	15111	60933	45485	43741
IRDEMAATEQDK	12	1	1405.65	P13585	P13585	235	246	yes	2;3;4	3.28e-14	169.46	107520000000	403600	769480	991680	347810	626210	801720	671860	579580	711900
MQCCCDSGR	9	0	1172.38	F1NII7;Q9DDR6;Q804J3;A0A1D5NW86	F1NII7	359	367	no	2	0.00038098	169.44	1588100000	33863	40525	36824	26397	55984	39209	35919	20826	18098
ADVDAATLAR	10	0	1001.51	E1BZ05;P02542;O73665	E1BZ05	205	214	yes	2	6.49e-06	169.44	46932000000	143190	162150	167250	58098	95374	87183	272860	171070	151510
IASLEIPLAK	10	0	1053.64	A0A3Q3A948	A0A3Q3A948	173	182	yes	2;3	1.38e-05	169.44	11613000000	71290	213040	199930	80571	194770	164190	64511	48652	61699
VVDLMVHMASK	11	0	1228.63	P00356;F1NH87	P00356	322	332	yes	2;3	3.26e-09	169.37	32263000000	646190	1081900	1133200	188610	223670	318430	344910	439510	417760
IPEVNQGQLAK	11	0	1195.66	F1NNW0;Q02173	F1NNW0	1430	1440	yes	2;3	1.41e-08	169.37	23239000000	131250	235940	243930	200540	455390	401460	435560	359340	358600
EAAEPPAAGGAAK	13	0	1138.56	A0A3Q2U8Y0	A0A3Q2U8Y0	5	17	yes	2;3	1.42e-15	169.37	1367900000	31035	65058	63229	50722	144680	99712	136330	78970	94715
PATHNAAPGGHVGDSTQELAEGLR	24	0	2384.15	A0A3Q2U6G6	A0A3Q2U6G6	98	121	yes	3;4	1.36e-70	169.33	18494000000	107840	166230	198010	49981	81780	91230	226860	196540	191360
LVIVTAGAR	9	0	898.56	P00340;E1BTT8;A0A1D5NZ01	P00340	91	99	yes	2	0.00038262	169.26	28920000000	14941	26344	23261	102840	164060	172960	22299	36506	31484
MFTTYPQTK	9	0	1115.53	P02001	P02001	32	40	yes	2;3	0.00011046	169.21	6298900000	148320	236930	282560	136420	281590	250460	185010	112250	115120
QLADEEEHAAEDLLQR	16	0	1865.88	F1NSZ5	F1NSZ5	443	458	yes	3	2.49e-45	169.15	2017500000	10422	15234	16115	6685.8	10787	14107	16555	14413	11348
AAQEEYVKR	9	1	1092.56	Q92007	Q92007	1	9	yes	2;3	0.00033227	169.09	46931000000	106640	118430	81341	608330	2438300	528030	446400	257260	212630
ANACNSVIK	9	0	975.481	P13585;Q03669;A0A1L1RKB7;A0A3Q2UHS6;Q9YGL9;F1NNV0	P13585	468	476	no	2;3	2.14e-05	169.09	116660000000	275640	419180	392330	223380	558240	429640	674430	483780	532470
FFGNLMDANK	10	0	1155.54	F1NN63;Q2UZR2	F1NN63	361	370	yes	2;3	4.96e-06	169.09	14478000000	299520	722710	1340900	69873	148670	301700	107630	153840	134640
DIGDFPSVVHSLAFQK	16	0	1758.89	A0A3Q3A4C6;A0A1D5NY50;Q9DEG5;Q9DEH4;Q9DEG4	A0A3Q3A4C6	864	879	no	3	5.55e-46	169.04	1098200000	72632	104790	137680	38056	32766	71503	23966	32223	30005
SQIEEVEDASEPTKR	15	1	1716.82	A0A1D5PLW0	A0A1D5PLW0	324	338	yes	3	1.62e-29	169.02	3081900000	45515	72903	79012	57632	137890	139260	36105	29163	31723
YKPVPDEPPNPTNVEETLR	19	1	2194.09	Q9DEA4;H9KZU7;Q9PUQ7;A0A3Q2UAU4	Q9DEA4	164	182	yes	3;4	7.33e-48	168.99	12444000000	179720	306380	324180	138450	324850	294310	418450	347450	352090
GGNIGDGGGAADR	13	0	1115.5	Q5ZMU9;A0A182C6H1;A0A1D5P448;A0A1D5NTY5;A0A182C5X0;A0A1D5PXG2;A0A1D5PF52;A0A1D5P8L6	Q5ZMU9	587	599	yes	2;3	3.35e-20	168.98	8599600000	88484	85822	96126	62290	107950	72670	143450	104620	104230
DCDLQEDACYNCGR	14	0	1774.63	A0A1D6UPT3	A0A1D6UPT3	59	72	yes	2;3	2.31e-14	168.98	569250000	2060.2	2384.3	2560.9	20180	41606	42807	26828	19286	22177
EAYPGDVFYLHSR	13	0	1552.73	A0A1L1RY35;A0A1D5PN54;A0A175KE65;Q8UVX3;A0A1D5PJG9;A0A1L1RZJ6;A0A182C637;A0A1D5P3S4	A0A1L1RY35	320	332	no	2;3	2.56e-19	168.85	10261000000	102680	67721	74813	100390	136400	124230	130280	122560	131860
ALVGEVAAEQLER	13	0	1383.74	A0A1D5Q008	A0A1D5Q008	169	181	yes	2;3	2.56e-19	168.85	2178800000	94264	108460	109570	92287	145930	147970	33402	27318	28315
GDEELDSLIK	10	0	1117.55	Q5ZMD6;P02272	Q5ZMD6	93	102	yes	2;3	3.77e-06	168.83	6735100000	264690	419420	396190	257690	552690	406780	431440	258490	254560
VSAENEIGVGNPSPPSKPIFAR	22	1	2265.18	Q07784	Q07784	431	452	yes	2;3;4	1.47e-62	168.83	9233500000	156050	282140	333110	16500	29154	39012	185590	202870	171520
LDPAYQVDK	9	0	1047.52	P16419	P16419	256	264	no	2;3	0.00051861	168.83	7225300000	92762	176050	170380	231010	543980	478060	224750	190830	213980
NLVTEEVMK	9	0	1061.54	F1NIJ6;Q5ZMU3;A0A1L1RQ91;A0A1L1RPE8;A0A1D5PRS4	F1NIJ6	57	65	yes	2;3	0.00010243	168.83	150960000000	244860	599930	634340	201860	718570	577070	1692200	1378700	1464900
GPYFLTAETLK	11	0	1238.65	A0A3Q2UD12;P15989;F1P2F0;A0A1D5PGD5;A0A3Q3AR07;A0A3Q2UMJ2;A0A3Q2U4U7	A0A3Q2UD12	1720	1730	yes	2;3	1.9e-08	168.83	348650000	72175	117020	140900	14907	26076	31682	70314	62528	56905
LDTDDLDEIEK	11	0	1304.6	Q5ZMC1	Q5ZMC1	466	476	yes	2	3.38e-09	168.79	784250000	78833	137910	141160	24681	65032	52734	79844	55283	57676
YGADVAAFADK	11	0	1126.53	F1NSC1	F1NSC1	327	337	yes	2;3	3.38e-09	168.79	526340000	48914	76678	101250	16395	35561	53848	103300	162530	135760
LETDPLILIDK	11	0	1268.72	A0A3Q2UEL1;F1NF80	A0A3Q2UEL1	335	345	yes	2	3.38e-09	168.79	275520000	56437	91677	97410	0	0	0	102340	105240	100750
ALLEVVQSGGK	11	0	1099.62	A0A1D5PJW4;O13268	A0A1D5PJW4	194	204	yes	2	3.38e-09	168.79	510890000	16413	27200	33799	0	0	0	70442	60239	56181
HILVINDSQFDDEGEYTAEVEGK	23	0	2607.2	A6BM71;A6BLM5;A6BM73	A6BM71	5776	5798	yes	3	4.05e-63	168.78	294350000	1442.6	4244.1	3615.8	4987.4	11760	9398.3	23956	52067	42938
[truncated: 8,662 more rows]

## Sheet: proteins
Protein IDs	Majority protein IDs	Fasta headers	Number of proteins	Peptides	Razor + unique peptides	Unique peptides	Sequence coverage [%]	Mol. weight [kDa]	Sequence length	Score	Ratio AX1	Ratio AX2	Ratio AX3	Ratio BX1	Ratio BX2	Ratio BX3	Ratio CX1	Ratio CX2	Ratio CX3	Ratio DX1	Ratio DX2	Ratio DX3
A0A0A0MQ61;Q9W6J3;A0A1D5NT70	A0A0A0MQ61;Q9W6J3;A0A1D5NT70	tr|A0A0A0MQ61|A0A0A0MQ61_CHICK Uncharacterized protein OS=Gallus gallus OX=9031 GN=GSTAL2 PE=4 SV=1;tr|Q9W6J3|Q9W6J3_CHICK Glutathione S-transferase class-alpha (Fragment) OS=Gallus gallus OX=9031 PE=2 SV=1;tr|A0A1D5NT70|A0A1D5NT70_CHICK Uncharacterized pr	3	3	3	3	15.8	25.222	221	4.2907	0.656045	0.568356	0.949177	1.09739	1.00101	1.07997	1.29579	1.49101	1.17532	0.950775	0.939627	0.795532
A0A140F3I0;A0A140F3H9;A0A140F3H8;A0A140F3H6;A0A3Q2TXF6;P19204;F1NQT9	A0A140F3I0;A0A140F3H9;A0A140F3H8;A0A140F3H6;A0A3Q2TXF6;P19204;F1NQT9	tr|A0A140F3I0|A0A140F3I0_CHICK Calsequestrin (Fragment) OS=Gallus gallus OX=9031 GN=CASQ2 PE=2 SV=1;tr|A0A140F3H9|A0A140F3H9_CHICK Calsequestrin (Fragment) OS=Gallus gallus OX=9031 GN=CASQ2 PE=2 SV=1;tr|A0A140F3H8|A0A140F3H8_CHICK Calsequestrin (Fragment)	7	7	7	7	22.1	38.617	330	167.75	0.803582	0.910968	0.987406	1.13526	0.950101	1.03977	1.05113	1.08532	1.05067	1.01004	1.05361	0.922149
A0A1D5NT47;F1NK75;A0A1L1RPQ6;A0A1L1RUW5;A0A3Q2TWH7;A0A1D5P3Z9;A0A3Q3AJ53;E1BW44	A0A1D5NT47;F1NK75;A0A1L1RPQ6	tr|A0A1D5NT47|A0A1D5NT47_CHICK Uncharacterized protein OS=Gallus gallus OX=9031 GN=TPM4 PE=3 SV=2;tr|F1NK75|F1NK75_CHICK Uncharacterized protein OS=Gallus gallus OX=9031 GN=TPM4 PE=3 SV=2;tr|A0A1L1RPQ6|A0A1L1RPQ6_CHICK Uncharacterized protein OS=Gallus gal	8	23	4	4	58.3	31.373	271	80.676	1.29811	1.37767	0.890668	0.931262	0.838081	1.05268	0.986503	0.967651	1.17662	0.78412	0.816595	0.880032
A0A1D5NT92	A0A1D5NT92	tr|A0A1D5NT92|A0A1D5NT92_CHICK Uncharacterized protein OS=Gallus gallus OX=9031 GN=MYOT PE=4 SV=1	1	18	18	18	41.9	57.366	513	203.32	0.835587	0.891007	0.916807	1.07605	1.04662	0.822251	0.940716	0.98463	0.856739	1.14765	1.07774	1.4042
A0A1D5NTD0;A0A1D5PLW8;A0A3Q2U7W1;A0A1D5P251	A0A1D5NTD0;A0A1D5PLW8	tr|A0A1D5NTD0|A0A1D5NTD0_CHICK Uncharacterized protein OS=Gallus gallus OX=9031 GN=ALPK3 PE=4 SV=1;tr|A0A1D5PLW8|A0A1D5PLW8_CHICK Uncharacterized protein OS=Gallus gallus OX=9031 GN=ALPK3 PE=4 SV=1	4	31	31	31	23.5	166.76	1532	178.84	1.04699	1.02188	1.08826	1.05455	1.05994	1.05385	0.988456	1.09396	0.982851	0.910007	0.824228	0.875039
A0A1D5NTG0;Q5ZLC3	A0A1D5NTG0;Q5ZLC3	tr|A0A1D5NTG0|A0A1D5NTG0_CHICK MPN domain-containing protein OS=Gallus gallus OX=9031 GN=COPS5 PE=4 SV=1;tr|Q5ZLC3|Q5ZLC3_CHICK MPN domain-containing protein OS=Gallus gallus OX=9031 GN=RCJMB04_6l21 PE=2 SV=1	2	4	4	4	15.4	37.752	337	75.141	0.968762	0.898477	1.04126	0.995363	1.05859	1.01267	1.00054	1.05888	0.998021	1.03534	0.984056	0.948045
A0A1D5NTN7;A0A1L1RWJ7	A0A1D5NTN7;A0A1L1RWJ7	tr|A0A1D5NTN7|A0A1D5NTN7_CHICK Uncharacterized protein OS=Gallus gallus OX=9031 GN=PLAA PE=4 SV=1;tr|A0A1L1RWJ7|A0A1L1RWJ7_CHICK Uncharacterized protein OS=Gallus gallus OX=9031 GN=PLAA PE=4 SV=2	2	4	4	4	4.5	84.94	770	3.9134	0.443033	0.569585	0.842893	1.78643	0.610485	0.902024	0.916723	2.00635	0.876423	0.853813	0.813578	1.37866
A0A1D5NTS2	A0A1D5NTS2	tr|A0A1D5NTS2|A0A1D5NTS2_CHICK Alpha-carbonic anhydrase domain-containing protein OS=Gallus gallus OX=9031 GN=CA3A PE=3 SV=1	1	13	13	13	44.3	29.722	262	137.98	0.615535	0.542812	0.54421	1.75548	0.741909	0.74033	0.742741	2.02564	0.587146	0.886245	0.689639	2.12831
A0A1D5NTT1;A0A3Q2UMF4;F1NIP2	A0A1D5NTT1;A0A3Q2UMF4;F1NIP2	tr|A0A1D5NTT1|A0A1D5NTT1_CHICK 5-demethoxyubiquinone hydroxylase, mitochondrial OS=Gallus gallus OX=9031 GN=COQ7 PE=3 SV=2;tr|A0A3Q2UMF4|A0A3Q2UMF4_CHICK Uncharacterized protein OS=Gallus gallus OX=9031 GN=COQ7 PE=4 SV=1;tr|F1NIP2|F1NIP2_CHICK 5-demethoxyu	3	1	1	1	7.6	24.78	225	3.1957	1.26702	0.952288		0.875977	0.78583		1.11635	1.17076		0.740653	1.09113
A0A1D5NU19	A0A1D5NU19	tr|A0A1D5NU19|A0A1D5NU19_CHICK Uncharacterized protein OS=Gallus gallus OX=9031 GN=WDR11 PE=4 SV=2	1	1	1	1	0.7	136.09	1222	1.7586	0.793405	0.849847	0.708345	0.910723	0.643716	1.16961	1.39228	1.44433	1.07631	0.903591	1.06211	1.04573
A0A1D5NU37;A0A1D5PMI8	A0A1D5NU37;A0A1D5PMI8	tr|A0A1D5NU37|A0A1D5NU37_CHICK Uncharacterized protein OS=Gallus gallus OX=9031 GN=SCRN3 PE=4 SV=2;tr|A0A1D5PMI8|A0A1D5PMI8_CHICK Uncharacterized protein OS=Gallus gallus OX=9031 GN=SCRN3 PE=4 SV=2	2	5	5	5	11	46.816	420	19.204	0.835098	1.83781	1.00017	1.01826	0.512681	1.00765	1.12629	0.813352	1.08905	1.02035	0.836154	0.903133
A0A1D5NU50;A0A3Q2TW07;F1NJT3;F1NJT4;P11722	A0A1D5NU50;A0A3Q2TW07;F1NJT3;F1NJT4;P11722	tr|A0A1D5NU50|A0A1D5NU50_CHICK Fibronectin OS=Gallus gallus OX=9031 GN=FN1 PE=4 SV=2;tr|A0A3Q2TW07|A0A3Q2TW07_CHICK Fibronectin OS=Gallus gallus OX=9031 GN=FN1 PE=4 SV=1;tr|F1NJT3|F1NJT3_CHICK Fibronectin OS=Gallus gallus OX=9031 GN=FN1 PE=4 SV=1;tr|F1NJT4	5	7	7	7	3.9	253.67	2307	26.855	0.797514	0.769513	0.885105	1.00377	0.877162	0.7406	1.05755	0.868384	0.79155	1.14117	1.48494	1.58274
A0A1D5NUM3;A0A3Q2UKY3	A0A1D5NUM3;A0A3Q2UKY3	tr|A0A1D5NUM3|A0A1D5NUM3_CHICK Uncharacterized protein OS=Gallus gallus OX=9031 GN=AAMDC PE=4 SV=1;tr|A0A3Q2UKY3|A0A3Q2UKY3_CHICK Uncharacterized protein OS=Gallus gallus OX=9031 GN=AAMDC PE=4 SV=1	2	4	4	4	34.4	13.123	122	27.592	1.35867	0.948286	1.02649	0.96528	1.16869	1.06493	1.09894	1.21573	1.15987	0.577103	0.667293	0.748715
A0A1D5NUN2;F1NAA5;A0A1D5P0C1;Q5ZHU2;A0A1D5NV65	A0A1D5NUN2;F1NAA5	tr|A0A1D5NUN2|A0A1D5NUN2_CHICK Uncharacterized protein OS=Gallus gallus OX=9031 GN=PGM2L1 PE=4 SV=1;tr|F1NAA5|F1NAA5_CHICK Uncharacterized protein OS=Gallus gallus OX=9031 GN=PGM2L1 PE=4 SV=2	5	8	8	8	11.8	68.465	603	18.738	0.791617	0.949088	1.08933	1.14164	1.18352	0.998877	1.09639	1.02796	1.04648	0.970348	0.839437	0.865315
A0A1D5NUR5	A0A1D5NUR5	tr|A0A1D5NUR5|A0A1D5NUR5_CHICK Uncharacterized protein OS=Gallus gallus OX=9031 GN=SNTA1 PE=4 SV=1	1	7	7	7	15.1	51.678	484	43.254	0.90503	0.968249	1.09326	1.04173	1.05427	1.02901	1.04822	1.02636	0.992359	1.00502	0.951124	0.88537
A0A1D5NUY5;A0A1D5P797;A0A1D5PJY1	A0A1D5NUY5;A0A1D5P797;A0A1D5PJY1	tr|A0A1D5NUY5|A0A1D5NUY5_CHICK Spectrin beta chain OS=Gallus gallus OX=9031 GN=SPTBN1 PE=3 SV=2;tr|A0A1D5P797|A0A1D5P797_CHICK Spectrin beta chain OS=Gallus gallus OX=9031 GN=SPTBN1 PE=3 SV=2;tr|A0A1D5PJY1|A0A1D5PJY1_CHICK Spectrin beta chain OS=Gallus gal	3	15	15	15	7.3	257.14	2218	20.82	1.36649	1.25015	0.958648	0.809048	0.93998	0.930353	0.853253	0.888585	1.05693	0.971211	0.921289	1.05407
A0A1D5NV31	A0A1D5NV31	tr|A0A1D5NV31|A0A1D5NV31_CHICK RRM domain-containing protein OS=Gallus gallus OX=9031 PE=4 SV=2	1	1	1	1	12.6	14.47	127	3.1177		0.72283	1.10382		1.03921	0.969221		1.10642	0.902129		1.13154	1.02483
A0A1D5NV75;A0A1D5NUZ0	A0A1D5NV75;A0A1D5NUZ0	tr|A0A1D5NV75|A0A1D5NV75_CHICK Uncharacterized protein OS=Gallus gallus OX=9031 GN=NAPA PE=4 SV=2;tr|A0A1D5NUZ0|A0A1D5NUZ0_CHICK Uncharacterized protein OS=Gallus gallus OX=9031 GN=NAPA PE=4 SV=2	2	5	5	5	19	33.244	295	50.967	0.898667	0.841039	0.972304	1.05424	1.02056	1.01224	1.04106	1.04884	1.06104	1.00603	1.08956	0.954418
A0A1D5NVI1	A0A1D5NVI1	tr|A0A1D5NVI1|A0A1D5NVI1_CHICK Uncharacterized protein OS=Gallus gallus OX=9031 GN=RPL9 PE=4 SV=1	1	2	2	2	11.5	21.835	192	4.7761	1.03391	1.02027		0.955278	1.05203		0.949237	0.843187		1.06158	1.08452
A0A1D5NVM2	A0A1D5NVM2	tr|A0A1D5NVM2|A0A1D5NVM2_CHICK NADH dehydrogenase [ubiquinone] 1 alpha subcomplex subunit 2 OS=Gallus gallus OX=9031 GN=NDUFA2 PE=4 SV=1	1	2	2	2	15	11.071	100	1.9335	1.23329	1.03129	1.07326	0.994288	1.11362	0.795795	0.91449	1.07436	1.11432	0.857937	0.78073	1.01662
A0A1D5NVW6;Q90913;Q90900	A0A1D5NVW6	tr|A0A1D5NVW6|A0A1D5NVW6_CHICK Myosin-1B OS=Gallus gallus OX=9031 GN=MYH1B PE=3 SV=2	3	177	11	0	66.8	223.39	1944	323.31	0.774724	0.562042	1.50597	1.27519	0.507582	0.660062	0.799874	2.40813	0.815432	1.15021	0.522247	1.01853
A0A1D5NW27;P02552;A0A1D5P198;Q6PTX0;A0A3Q2U7S4	A0A1D5NW27;P02552;A0A1D5P198	tr|A0A1D5NW27|A0A1D5NW27_CHICK Tubulin alpha chain OS=Gallus gallus OX=9031 GN=TUBA1A PE=3 SV=1;sp|P02552|TBA1_CHICK Tubulin alpha-1 chain (Fragment) OS=Gallus gallus OX=9031 PE=1 SV=1;tr|A0A1D5P198|A0A1D5P198_CHICK Tubulin alpha chain OS=Gallus gallus OX=	5	15	15	2	45.9	50.135	451	311.59	0.787132	0.921028	0.945295	1.07403	0.944784	1.03569	0.982079	1.05109	0.919074	1.15675	1.0831	1.09994
A0A1D5NW43	A0A1D5NW43	tr|A0A1D5NW43|A0A1D5NW43_CHICK Uncharacterized protein OS=Gallus gallus OX=9031 GN=VPS25 PE=4 SV=1	1	1	1	1	6.3	20.404	174	7.2471	0.953015	0.964229	1.06513	1.0668	1.1173	0.922561	1.02414	0.972924	1.06718	0.956045	0.945545	0.945134
A0A1D5NW68	A0A1D5NW68	tr|A0A1D5NW68|A0A1D5NW68_CHICK Serum albumin OS=Gallus gallus OX=9031 GN=ALB PE=4 SV=2	1	40	40	4	72	64.004	565	323.31	0.80761	0.798048	0.973007	1.02729	0.978537	1.01886	1.11784	1.22684	1.04742	1.04727	0.996579	0.960715
A0A1D5NW88;A0A1D5NTC3;Q98906	A0A1D5NW88;A0A1D5NTC3;Q98906	tr|A0A1D5NW88|A0A1D5NW88_CHICK Microtubule-associated protein OS=Gallus gallus OX=9031 GN=MAP4 PE=4 SV=2;tr|A0A1D5NTC3|A0A1D5NTC3_CHICK Microtubule-associated protein OS=Gallus gallus OX=9031 GN=MAP4 PE=4 SV=3;tr|Q98906|Q98906_CHICK Microtubule-associated		13	12	12	15.5	111.7	1079	55.881	0.72355	0.891827	0.976607	1.0352	1.0706	1.02859	1.18694	0.988187	0.942903	1.05431	1.04939	1.0519
A0A1D5NW93	A0A1D5NW93	tr|A0A1D5NW93|A0A1D5NW93_CHICK ATP-synt_DE_N domain-containing protein OS=Gallus gallus OX=9031 GN=ATP5D PE=3 SV=2	1	2	2	2	14.3	16.817	161	33.328	0.964012	1.02598	0.965894	0.93658	1.06347	0.802035	0.938004	0.963712	1.04013	1.1614	0.946842	1.19194
A0A1D5NWH9;Q90650	A0A1D5NWH9;Q90650	tr|A0A1D5NWH9|A0A1D5NWH9_CHICK CSD_1 domain-containing protein OS=Gallus gallus OX=9031 GN=YBX3 PE=4 SV=2;tr|Q90650|Q90650_CHICK Rous sarcoma virus transcription enhancer factor II OS=Gallus gallus OX=9031 PE=2 SV=1	2	6	6	5	31.6	30.873	291	127.49	0.97594	1.05364	1.00454	0.985707	0.97182	0.925171	0.947596	0.995052	0.997884	1.09076	0.97949	1.07241
A0A1D5NX47;A0A3Q3ANR7	A0A1D5NX47;A0A3Q3ANR7	tr|A0A1D5NX47|A0A1D5NX47_CHICK GB1/RHD3-type G domain-containing protein OS=Gallus gallus OX=9031 GN=ATL2 PE=4 SV=1;tr|A0A3Q3ANR7|A0A3Q3ANR7_CHICK GB1/RHD3-type G domain-containing protein OS=Gallus gallus OX=9031 GN=ATL2 PE=4 SV=1	2	5	5	5	13.5	65.439	576	53.927	1.02301	1.25822	1.07797	1.07668	0.840482	0.967829	0.979967	0.944984	0.969658	0.920341	0.956318	0.984546
A0A1D5NX84	A0A1D5NX84	tr|A0A1D5NX84|A0A1D5NX84_CHICK Uncharacterized protein OS=Gallus gallus OX=9031 GN=TRABD PE=4 SV=1	1	1	1	1	3.1	42.998	386	1.7004	1.18142		1.68805	0.898121		0.780317	0.893805		0.59718	1.02665		0.934456
A0A1D5NXC6;A0A3Q2UI63;F1NBN1	A0A1D5NXC6;A0A3Q2UI63;F1NBN1	tr|A0A1D5NXC6|A0A1D5NXC6_CHICK Plug_translocon domain-containing protein OS=Gallus gallus OX=9031 GN=SEC61A2 PE=3 SV=1;tr|A0A3Q2UI63|A0A3Q2UI63_CHICK Plug_translocon domain-containing protein OS=Gallus gallus OX=9031 GN=SEC61A1 PE=3 SV=1;tr|F1NBN1|F1NBN1_C	3	2	2	2	3.8	52.229	476	2.8411		0.80444	1.05125		1.04187	0.915508		0.999074	0.951362		1.15461	1.08188
A0A1D5NXM0;A0A1D5NYE9;A0A1D5PAS6;E1C4Z7;A0A1D5NXN6;A0A1D5P234;A0A1L1RRN3;F6K433;F6K434;F6K431;F6K432	A0A1D5NXM0;A0A1D5NYE9;A0A1D5PAS6;E1C4Z7;A0A1D5NXN6;A0A1D5P234	tr|A0A1D5NXM0|A0A1D5NXM0_CHICK ZZ-type domain-containing protein OS=Gallus gallus OX=9031 GN=DTNA PE=4 SV=1;tr|A0A1D5NYE9|A0A1D5NYE9_CHICK ZZ-type domain-containing protein OS=Gallus gallus OX=9031 GN=DTNA PE=4 SV=2;tr|A0A1D5PAS6|A0A1D5PAS6_CHICK ZZ-type d	11	11	11	11	17	84.641	753	46.969	1.05148	1.19706	1.09231	1.08151	0.950073	1.00533	0.905416	0.977041	0.97861	0.961595	0.875825	0.923748
A0A1D5NXM7;A0A1L1RME9	A0A1D5NXM7;A0A1L1RME9	tr|A0A1D5NXM7|A0A1D5NXM7_CHICK MPN domain-containing protein OS=Gallus gallus OX=9031 GN=NPLOC4 PE=4 SV=1;tr|A0A1L1RME9|A0A1L1RME9_CHICK Uncharacterized protein OS=Gallus gallus OX=9031 GN=NPLOC4 PE=4 SV=2	2	5	5	5	8.1	66.892	592	3.8439	0.80601	1.13751	1.00037	1.10465	1.03307	1.02328	1.14517	0.938574	1.04068	0.944166	0.890843	0.935665
A0A1D5NXR2	A0A1D5NXR2	tr|A0A1D5NXR2|A0A1D5NXR2_CHICK Uncharacterized protein OS=Gallus gallus OX=9031 GN=BCAP31 PE=4 SV=1	1	5	5	5	17.1	27.228	240	11.462	1.2366	1.08974	1.2288	0.913748	1.02831	0.929622	1.01818	0.939326	0.939035	0.831478	0.942619	0.902543
A0A1D5NXT6	A0A1D5NXT6	tr|A0A1D5NXT6|A0A1D5NXT6_CHICK Uncharacterized protein OS=Gallus gallus OX=9031 GN=TRIM55 PE=4 SV=2	1	4	3	3	7.2	50.082	443	5.052	1.42317	1.19071	0.984382	0.674636	0.870629	0.935076	0.693709	0.778941	0.94045	1.20849	1.15972	1.14009
A0A1D5NXV1	A0A1D5NXV1	tr|A0A1D5NXV1|A0A1D5NXV1_CHICK Tubulin alpha chain OS=Gallus gallus OX=9031 GN=TUBA1C PE=3 SV=2	1	13	1	0	38.6	49.774	448	55.189	1.08663	1.35795	0.719659	1.33672	0.740219	1.41842	0.891918	1.06857	1.17091	0.684727	0.833256	0.69101
A0A1D5NXY4	A0A1D5NXY4	tr|A0A1D5NXY4|A0A1D5NXY4_CHICK Uncharacterized protein OS=Gallus gallus OX=9031 GN=BANF1 PE=4 SV=1	1	3	3	3	24.4	10.057	90	3.0892	1.02883	1.01118	1.15936	1.11627	1.10032	1.08515	1.00793	1.16002	0.974691	0.846979	0.728485	0.780796
A0A1D5NY74	A0A1D5NY74	tr|A0A1D5NY74|A0A1D5NY74_CHICK Asp-B-Hydro_N domain-containing protein OS=Gallus gallus OX=9031 PE=4 SV=2	1	2	2	2	12.4	17.869	161	7.586	0.67374	0.787983	1.17073	1.11307	1.15611	0.805101	1.04849	0.897952	0.993688	1.1647	1.15796	1.03048
A0A1D5NY89	A0A1D5NY89	tr|A0A1D5NY89|A0A1D5NY89_CHICK UBX domain-containing protein OS=Gallus gallus OX=9031 GN=FAF1 PE=4 SV=2	1	2	2	2	2.3	73.822	650	2.4105	1.79074		0.8629	0.687904		0.928498	0.680123		1.25545	0.841235		0.953148
A0A1D5NYA8	A0A1D5NYA8	tr|A0A1D5NYA8|A0A1D5NYA8_CHICK Uncharacterized protein OS=Gallus gallus OX=9031 GN=DNAJA4 PE=3 SV=2	1	3	3	3	6.5	44.802	398	7.4986	2.09682	1.18226	1.07329	0.580959	0.859199	0.803787	0.71821	0.902337	0.778425	0.604008	1.0562	1.34449
A0A1D5NYC2;Q90909	A0A1D5NYC2	tr|A0A1D5NYC2|A0A1D5NYC2_CHICK Uncharacterized protein OS=Gallus gallus OX=9031 GN=MYH1E PE=3 SV=1	2	190	4	0	69.6	223.13	1939	78.549	0.643119	0.689257	1.74096	1.25591	0.888413	0.567784	0.805757	1.14929	0.508477	1.29521	1.27304	1.18278
A0A1D5NYI5	A0A1D5NYI5	tr|A0A1D5NYI5|A0A1D5NYI5_CHICK CULLIN_2 domain-containing protein OS=Gallus gallus OX=9031 GN=CUL5 PE=3 SV=2	1	8	8	8	12.7	77.078	662	44.188	0.994024	1.12022	0.990163	1.04456	1.01304	1.05724	0.98321	0.987609	1.02921	0.978209	0.879133	0.923388
A0A1D5NYK7;Q5F347	A0A1D5NYK7	tr|A0A1D5NYK7|A0A1D5NYK7_CHICK Moesin OS=Gallus gallus OX=9031 PE=4 SV=1	2	15	12	12	24.5	68.37	580	18.595	1.04056	1.19201	1.08691	0.939945	0.920581	0.920239	0.903156	0.973697	0.904615	1.11634	0.913717	1.08823
A0A1D5NYX6;P00174	A0A1D5NYX6;P00174	tr|A0A1D5NYX6|A0A1D5NYX6_CHICK Cytochrome b5 OS=Gallus gallus OX=9031 GN=CYB5A PE=3 SV=2;sp|P00174|CYB5_CHICK Cytochrome b5 OS=Gallus gallus OX=9031 GN=CYB5A PE=1 SV=4	2	3	3	3	35.9	14.396	128	57.753	0.937314	0.967172	0.937442	0.955858	1.17027	1.00133	1.0493	0.885756	1.14483	1.05753	0.976806	0.916398
A0A1D5NZ30;P15771	A0A1D5NZ30;P15771	tr|A0A1D5NZ30|A0A1D5NZ30_CHICK Nucleolin OS=Gallus gallus OX=9031 GN=NCL PE=4 SV=1;sp|P15771|NUCL_CHICK Nucleolin OS=Gallus gallus OX=9031 GN=NCL PE=1 SV=1	2	3	3	3	4.9	75.399	691	25.541	1.21445	1.09983	1.03349	0.853119	1.04302	0.924976	0.763003	0.72367	0.891457	1.16943	1.13348	1.15008
A0A1D5NZF8;Q92062;F1NVN3	A0A1D5NZF8;Q92062;F1NVN3	tr|A0A1D5NZF8|A0A1D5NZF8_CHICK Ovotransferrin OS=Gallus gallus OX=9031 GN=MELTF PE=3 SV=1;tr|Q92062|Q92062_CHICK Ovotransferrin OS=Gallus gallus OX=9031 GN=EOS47 PE=2 SV=1;tr|F1NVN3|F1NVN3_CHICK Ovotransferrin OS=Gallus gallus OX=9031 GN=MELTF PE=3 SV=1	3	1	1	1	1.1	78.354	716	2.1793	1.17	1.41601		1.48064	0.528405		0.757721	1.51419		0.59164	0.541397
A0A1D5NZY9	A0A1D5NZY9	tr|A0A1D5NZY9|A0A1D5NZY9_CHICK Uncharacterized protein OS=Gallus gallus OX=9031 GN=MYH7B PE=3 SV=2	1	106	76	2	47.2	224.26	1941	323.31	0.934051	0.836689	0.733667	1.1321	1.53525	0.775937	1.02927	0.844548	0.733728	0.904578	0.783511	1.75667
A0A1D5P009	A0A1D5P009	tr|A0A1D5P009|A0A1D5P009_CHICK Uncharacterized protein OS=Gallus gallus OX=9031 GN=LRRC20 PE=4 SV=1	1	4	4	4	20.8	20.099	183	33.731	0.885036	0.936657	1.13938	1.10508	1.17207	1.02939	1.10072	1.04417	0.994791	0.909163	0.847108	0.836431
A0A1D5P061;A0A1D5PVZ4;E1BQZ7;A0A1D5PWP5;E1BTZ6	A0A1D5P061;A0A1D5PVZ4;E1BQZ7	tr|A0A1D5P061|A0A1D5P061_CHICK Phosphorylase b kinase regulatory subunit OS=Gallus gallus OX=9031 GN=PHKA1 PE=3 SV=2;tr|A0A1D5PVZ4|A0A1D5PVZ4_CHICK Phosphorylase b kinase regulatory subunit OS=Gallus gallus OX=9031 GN=PHKA1 PE=3 SV=2;tr|E1BQZ7|E1BQZ7_CHICK	5	43	43	43	36.7	134.07	1195	323.31	0.905318	0.920213	0.947209	1.07748	1.00226	1.06879	0.933009	1.00802	1.02134	1.08419	1.06951	0.962668
A0A1D5P0A1;A0A1L1RP39;Q5ZKW4;Q8JH65	A0A1D5P0A1;A0A1L1RP39;Q5ZKW4;Q8JH65	tr|A0A1D5P0A1|A0A1D5P0A1_CHICK UTP--glucose-1-phosphate uridylyltransferase OS=Gallus gallus OX=9031 GN=UGP2 PE=3 SV=1;tr|A0A1L1RP39|A0A1L1RP39_CHICK UTP--glucose-1-phosphate uridylyltransferase OS=Gallus gallus OX=9031 GN=UGP2 PE=3 SV=1;tr|Q5ZKW4|Q5ZKW4_C	4	17	17	17	40.2	56.834	508	224.41	0.861856	0.879363	1.05186	1.16244	1.01704	1.04521	1.02026	1.19868	1.01991	0.955449	0.904921	0.883029
A0A1D5P0B5	A0A1D5P0B5	tr|A0A1D5P0B5|A0A1D5P0B5_CHICK BTB domain-containing protein OS=Gallus gallus OX=9031 GN=KLHL41 PE=4 SV=1	1	19	19	19	31.2	68.552	606	213.63	0.662984	0.743428	0.861061	1.07187	0.92626	1.07056	0.992431	1.0854	0.932944	1.27272	1.24491	1.13544
A0A1D5P0D3;F1NLE7	A0A1D5P0D3;F1NLE7	tr|A0A1D5P0D3|A0A1D5P0D3_CHICK tRNA-binding domain-containing protein OS=Gallus gallus OX=9031 GN=AIMP1 PE=4 SV=1;tr|F1NLE7|F1NLE7_CHICK tRNA-binding domain-containing protein OS=Gallus gallus OX=9031 GN=AIMP1 PE=4 SV=3	2	4	3	3	15.8	33.866	310	8.7324		0.868901	1.03492		0.801922	0.915326		1.20076	0.977633		1.12842	1.07212
A0A1D5P0E2	A0A1D5P0E2	tr|A0A1D5P0E2|A0A1D5P0E2_CHICK Protein transport protein SEC23 OS=Gallus gallus OX=9031 GN=SEC23A PE=3 SV=1	1	4	4	4	5.6	86.186	765	9.0154	1.19789	1.13444	1.02066	0.906784	0.958995	0.933576	0.957488	0.962106	0.969712	0.937842	0.944458	1.07605
A0A1D5P0U8;A0A1L1RYK0	A0A1D5P0U8;A0A1L1RYK0	tr|A0A1D5P0U8|A0A1D5P0U8_CHICK ATP synthase subunit gamma OS=Gallus gallus OX=9031 GN=ATP5F1C PE=3 SV=1;tr|A0A1L1RYK0|A0A1L1RYK0_CHICK ATP synthase subunit gamma OS=Gallus gallus OX=9031 GN=ATP5F1C PE=3 SV=1	2	8	8	8	28	32.608	293	35.411	0.761154	0.785221	0.982332	1.08376	1.04643	0.961662	0.95638	0.9968	0.986194	1.1987	1.17155	1.06981
A0A1D5P0Y1;Q5ZKF0;A0A1L1RNV9	A0A1D5P0Y1;Q5ZKF0;A0A1L1RNV9	tr|A0A1D5P0Y1|A0A1D5P0Y1_CHICK TPR_REGION domain-containing protein OS=Gallus gallus OX=9031 GN=OGT PE=4 SV=2;tr|Q5ZKF0|Q5ZKF0_CHICK TPR_REGION domain-containing protein OS=Gallus gallus OX=9031 GN=RCJMB04_11d15 PE=2 SV=1;tr|A0A1L1RNV9|A0A1L1RNV9_CHICK TPR	3	2	2	2	2	115.51	1035	3.4933	1.41657	1.38153	1.02708	0.785178	0.756223	0.962744	0.886102	1.09126	1.02183	0.912147	0.770996	0.988345
A0A1D5P124;A0A3Q2U6P2;A0A3Q2U1R3;A0A3Q2TWS4;A0A3Q2UDA2;A0A3Q2UDG9;A0A3Q2UGN7;F1NG08;A0A1D5P758;A0A3Q3AGP4;Q90716	A0A1D5P124;A0A3Q2U6P2;A0A3Q2U1R3;A0A3Q2TWS4;A0A3Q2UDA2;A0A3Q2UDG9;A0A3Q2UGN7;F1NG08;A0A1D5P758;A0A3Q3AGP4	tr|A0A1D5P124|A0A1D5P124_CHICK Uncharacterized protein OS=Gallus gallus OX=9031 GN=ANK2 PE=4 SV=2;tr|A0A3Q2U6P2|A0A3Q2U6P2_CHICK Uncharacterized protein OS=Gallus gallus OX=9031 GN=ANK2 PE=4 SV=1;tr|A0A3Q2U1R3|A0A3Q2U1R3_CHICK Uncharacterized protein OS=Ga	11	5	5	5	1.3	414.26	3756	6.8634	0.754072	0.891091	1.00906	1.1606	1.08093	1.03896	1.02972	1.11132	1.03892	1.05561	0.916652	0.91305
A0A1D5P179	A0A1D5P179	tr|A0A1D5P179|A0A1D5P179_CHICK Uncharacterized protein OS=Gallus gallus OX=9031 GN=NDUFA13 PE=4 SV=1	1	3	3	3	18.8	16.777	144	2.2063	0.890242	0.775384	1.24314	1.10074	1.20965	0.854655	1.07756	1.15527	1.03886	0.931457	0.859692	0.863346
A0A1D5P185;Q5F354;H9L3L2	A0A1D5P185;Q5F354;H9L3L2	tr|A0A1D5P185|A0A1D5P185_CHICK Coatomer subunit alpha OS=Gallus gallus OX=9031 GN=COPA PE=4 SV=1;tr|Q5F354|Q5F354_CHICK Coatomer subunit alpha OS=Gallus gallus OX=9031 GN=RCJMB04_34d13 PE=2 SV=1;tr|H9L3L2|H9L3L2_CHICK Coatomer subunit alpha OS=Gallus gallu	3	4	4	4	4.2	129.8	1150	11.45	0.957792	1.05058	0.985494	0.943295	0.98465	0.963632	0.912567	0.992693	0.988444	1.18635	0.972078	1.06243
A0A1D5P1J7	A0A1D5P1J7	tr|A0A1D5P1J7|A0A1D5P1J7_CHICK Uncharacterized protein OS=Gallus gallus OX=9031 GN=ATP5MF PE=4 SV=1	1	2	2	2	22.5	10.308	89	12.313	1.13995	0.916007	1.03618	0.972719	0.780369	1.00672	0.930123	1.14125	1.02421	0.95721	1.16238	0.932897
A0A1D5P1R0;A0A1D5P0L8	A0A1D5P1R0	tr|A0A1D5P1R0|A0A1D5P1R0_CHICK Uncharacterized protein OS=Gallus gallus OX=9031 GN=JPH1 PE=4 SV=2	2	16	16	14	20	87.919	816	99.076	0.958334	1.15965	1.04859	1.106	0.978866	1.05741	1.00401	0.927364	1.01798	0.931657	0.934116	0.876024
A0A1D5P1U2	A0A1D5P1U2	tr|A0A1D5P1U2|A0A1D5P1U2_CHICK Pyruvate dehydrogenase E1 component subunit beta OS=Gallus gallus OX=9031 GN=PDHB PE=4 SV=2	1	8	8	8	23.7	38.877	359	175.91	0.89164	0.94243	0.961916	1.08238	0.937269	1.00479	1.09306	1.19642	1.05408	0.932927	0.923877	0.979212
A0A1D5P1V6;R4GHJ7;Q5ZME3;A0A1D5PA64;A0A1D5PND5	A0A1D5P1V6;R4GHJ7;Q5ZME3;A0A1D5PA64;A0A1D5PND5	tr|A0A1D5P1V6|A0A1D5P1V6_CHICK Phosphorylase b kinase regulatory subunit OS=Gallus gallus OX=9031 GN=PHKB PE=3 SV=2;tr|R4GHJ7|R4GHJ7_CHICK Phosphorylase b kinase regulatory subunit OS=Gallus gallus OX=9031 GN=PHKB PE=3 SV=2;tr|Q5ZME3|Q5ZME3_CHICK Phosphory	5	30	30	30	27.3	123.31	1084	164.52	0.956547	0.965763	1.0266	1.07036	0.962597	1.0173	0.911904	1.02716	1.01256	1.06119	1.04448	0.943548
A0A1D5P1W7	A0A1D5P1W7	tr|A0A1D5P1W7|A0A1D5P1W7_CHICK Importin N-terminal domain-containing protein OS=Gallus gallus OX=9031 GN=KPNB1 PE=4 SV=2	1	8	8	8	11.2	97.332	876	24.513	1.28798	0.978423	1.0253	0.927754	1.01003	0.93388	0.875748	1.0885	0.967534	0.908515	0.923045	1.07328
A0A1D5P263	A0A1D5P263	tr|A0A1D5P263|A0A1D5P263_CHICK Abhydrolase_2 domain-containing protein OS=Gallus gallus OX=9031 GN=LYPLA1 PE=4 SV=1	1	4	4	4	16.6	24.623	229	8.3416	0.798836	0.964572	1.05363	1.06349	1.03024	1.03437	0.98061	0.996809	0.979178	1.15706	1.00838	0.932823
A0A1D5P287;P10587	A0A1D5P287;P10587	tr|A0A1D5P287|A0A1D5P287_CHICK Myosin-11 OS=Gallus gallus OX=9031 GN=MYH11 PE=3 SV=2;sp|P10587|MYH11_CHICK Myosin-11 OS=Gallus gallus OX=9031 GN=MYH11 PE=1 SV=4	2	20	12	11	11.9	228.72	1978	58.467	1.26166	1.40212	0.815743	1.06016	0.83041	1.03779	0.901858	0.933641	1.06394	0.776323	0.833828	1.08252
A0A1D5P2A5;E1BVC2	A0A1D5P2A5;E1BVC2	tr|A0A1D5P2A5|A0A1D5P2A5_CHICK TIP120 domain-containing protein OS=Gallus gallus OX=9031 GN=CAND2 PE=4 SV=1;tr|E1BVC2|E1BVC2_CHICK TIP120 domain-containing protein OS=Gallus gallus OX=9031 GN=CAND2 PE=4 SV=3	2	26	26	23	24.2	134.42	1213	185.3	0.848203	0.885046	1.039	1.09593	1.0592	1.03074	1.07314	1.1037	1.04283	0.982725	0.952054	0.887427
A0A1D5P2E0;F1NXA5;A0A3Q2UDJ8;A0A3Q2TXM2	A0A1D5P2E0;F1NXA5;A0A3Q2UDJ8;A0A3Q2TXM2	tr|A0A1D5P2E0|A0A1D5P2E0_CHICK Coronin OS=Gallus gallus OX=9031 GN=CORO6 PE=3 SV=2;tr|F1NXA5|F1NXA5_CHICK WD_REPEATS_REGION domain-containing protein OS=Gallus gallus OX=9031 GN=CORO6 PE=4 SV=4;tr|A0A3Q2UDJ8|A0A3Q2UDJ8_CHICK WD_REPEATS_REGION domain-contai	4	8	8	1	14.9	59.404	531	25.132	0.982535	0.965174	1.03347	1.01592	1.10373	0.985745	0.967795	1.03466	1.05384	1.03375	0.896441	0.926937
A0A1D5P2I9;A0A1D5NVP0	A0A1D5P2I9;A0A1D5NVP0	tr|A0A1D5P2I9|A0A1D5P2I9_CHICK Protein kinase domain-containing protein OS=Gallus gallus OX=9031 GN=MAP2K4 PE=3 SV=2;tr|A0A1D5NVP0|A0A1D5NVP0_CHICK Protein kinase domain-containing protein OS=Gallus gallus OX=9031 GN=MAP2K4 PE=3 SV=1	2	2	2	2	5.2	43.616	382	3.2995	1.48652	1.0077		0.830815	1.08988		0.840877	0.952551		0.841792	0.949875
A0A1D5P2K1	A0A1D5P2K1	tr|A0A1D5P2K1|A0A1D5P2K1_CHICK Uncharacterized protein OS=Gallus gallus OX=9031 GN=RAD23A PE=4 SV=2	1	3	3	3	8	39.373	362	9.5497	1.08765	1.11997	0.672428	0.944229	1.02224	1.32672	1.06945	0.90482	1.14029	0.898667	0.952972	0.860565
A0A1D5P2L3	A0A1D5P2L3	tr|A0A1D5P2L3|A0A1D5P2L3_CHICK CULLIN_2 domain-containing protein OS=Gallus gallus OX=9031 GN=CUL1 PE=3 SV=1	1	5	5	5	6.2	89.69	776	7.206	1.17324	1.06991	1.03668	0.922928	1.02072	0.993487	0.874874	1.0319	1.00922	1.02895	0.877469	0.960613
A0A1D5P2P4;E1BZI5	A0A1D5P2P4;E1BZI5	tr|A0A1D5P2P4|A0A1D5P2P4_CHICK Uncharacterized protein OS=Gallus gallus OX=9031 GN=SYNE2 PE=4 SV=1;tr|E1BZI5|E1BZI5_CHICK Uncharacterized protein OS=Gallus gallus OX=9031 GN=SYNE2 PE=4 SV=4	2	3	3	3	0.4	798.37	6959	2.5229	1.00476	0.940903		1.16274	1.06735		0.961792	1.02993		0.870709	0.961809
A0A1D5P2Y6	A0A1D5P2Y6	tr|A0A1D5P2Y6|A0A1D5P2Y6_CHICK Uncharacterized protein OS=Gallus gallus OX=9031 GN=PBXIP1 PE=4 SV=1	1	7	7	7	16.4	67.263	622	61.604	0.752765	0.789411	0.936656	1.11561	1.03519	1.03242	0.995751	1.1048	1.0396	1.13587	1.0706	0.99133
A0A1D5P384	A0A1D5P384	tr|A0A1D5P384|A0A1D5P384_CHICK Uncharacterized protein OS=Gallus gallus OX=9031 GN=NDUFB7 PE=4 SV=2	1	1	1	1	8.5	18.215	153	19.006	0.873891	0.84297	1.12431	1.10947	1.13597	0.941507	1.0544	1.15271	1.02116	0.96224	0.868349	0.913016
A0A1D5P3B1;Q5ZI56	A0A1D5P3B1;Q5ZI56	tr|A0A1D5P3B1|A0A1D5P3B1_CHICK Uncharacterized protein OS=Gallus gallus OX=9031 GN=RPL11 PE=3 SV=1;tr|Q5ZI56|Q5ZI56_CHICK Uncharacterized protein OS=Gallus gallus OX=9031 GN=RCJMB04_30d2 PE=2 SV=1	2	7	7	7	32	20.233	178	31.835	0.883044	1.08923	1.01135	1.03843	0.948542	0.962915	0.940415	0.844721	0.955666	1.13811	1.11751	1.07006
A0A1D5P3K4	A0A1D5P3K4	tr|A0A1D5P3K4|A0A1D5P3K4_CHICK NADH dehydrogenase [ubiquinone] 1 alpha subcomplex subunit 8 OS=Gallus gallus OX=9031 GN=NDUFA8 PE=3 SV=1	1	1	1	1	8.7	20.125	172	13.997	1.10104	1.49851	0.379402	0.898564	0.439204	1.10577	1.56332	1.46412	1.43822	0.437072	0.598166	1.0766
A0A1D5P3Q3	A0A1D5P3Q3	tr|A0A1D5P3Q3|A0A1D5P3Q3_CHICK RMT2 domain-containing protein OS=Gallus gallus OX=9031 GN=GAMT PE=4 SV=1	1	1	1	1	7.2	26.971	237	31.516	0.628976	0.474806	0.967545	0.183704	0.472971	0.24849	0.477478	0.215176	0.165959	2.70984	2.83705	2.61801
A0A1D5P409;A0A3Q2UKD6;A0A1D5P121;A0A1D5P8L0;A0A3Q2U190;A0A1D5PQC0;A0A1D5PAZ2;F1NY52	A0A1D5P409;A0A3Q2UKD6;A0A1D5P121;A0A1D5P8L0;A0A3Q2U190;A0A1D5PQC0;A0A1D5PAZ2;F1NY52	tr|A0A1D5P409|A0A1D5P409_CHICK Uncharacterized protein OS=Gallus gallus OX=9031 GN=LMO7 PE=4 SV=2;tr|A0A3Q2UKD6|A0A3Q2UKD6_CHICK Uncharacterized protein OS=Gallus gallus OX=9031 GN=LMO7 PE=4 SV=1;tr|A0A1D5P121|A0A1D5P121_CHICK Uncharacterized protein OS=Ga	8	3	3	3	2.4	141.95	1246	3.5286	1.57793		0.968045	0.825612		0.991051	0.759414		1.06671	0.837048		0.97419
A0A1D5P470	A0A1D5P470	tr|A0A1D5P470|A0A1D5P470_CHICK Glutathione S-transferase OS=Gallus gallus OX=9031 GN=GST2L PE=3 SV=2	1	9	9	7	38.4	25.449	219	104.32	0.895701	0.917607	0.897044	1.05629	1.03626	1.15947	1.21925	1.19404	1.18003	0.828762	0.8521	0.763457
A0A1D5P4Q8	A0A1D5P4Q8	tr|A0A1D5P4Q8|A0A1D5P4Q8_CHICK Uncharacterized protein OS=Gallus gallus OX=9031 GN=TTLL8 PE=4 SV=2	1	2	2	2	8.7	20.853	183	2.4942	1.80017	1.08006		0.766563	1.06512		0.785699	0.879987		0.647567	0.974835
A0A1D5P4W0	A0A1D5P4W0	tr|A0A1D5P4W0|A0A1D5P4W0_CHICK Uncharacterized protein OS=Gallus gallus OX=9031 GN=RCC1 PE=4 SV=2	1	1	1	1	4.6	44.522	417	8.1233	1.22789	1.43018	0.988223	0.981754	0.826827	1.05185	0.939697	0.909126	0.853143	0.850659	0.833871	1.10679
A0A1D5P525;Q9DGM4;A0A1D5NWE9;A0A3Q2UHY4;Q90911;Q9PSR5;A0A3Q2TRY7;A0A1D5PPK8;Q91983;Q789B3;Q7LZ88;Q7LZS7;Q5W4S9;E1BUG7;A0A0R3P9C1;A0A1D5PM21;Q5ZMJ9;E1BQL2;A0A3Q2TSY7;A0A1D5PQY8;REV__A0A1D5PHF3;REV__E1BR04;REV__Q5ZIK7;REV__F1NZB7;REV__A0A1D5NX37;REV__R9PXL8;REV__O42184;REV__E1C330	A0A1D5P525;Q9DGM4	tr|A0A1D5P525|A0A1D5P525_CHICK Uncharacterized protein OS=Gallus gallus OX=9031 GN=MYH1C PE=3 SV=1;tr|Q9DGM4|Q9DGM4_CHICK Fast myosin heavy chain isoform 3 OS=Gallus gallus OX=9031 PE=2 SV=1	28	176	6	2	65.9	223.24	1941	323.31	0.762121	0.738176	0.679508	1.50887	0.782419	0.820942	0.78103	1.56951	0.728385	0.947982	0.909891	1.77116
A0A1D5P592	A0A1D5P592	tr|A0A1D5P592|A0A1D5P592_CHICK Uncharacterized protein OS=Gallus gallus OX=9031 GN=PCCB PE=4 SV=1	1	3	3	3	5.9	57.502	529	4.5934	1.49054	1.63399	0.919017	0.781904	0.672926	0.90677	0.744207	0.929732	1.02264	0.98335	0.763353	1.15157
A0A1D5P5B2	A0A1D5P5B2	tr|A0A1D5P5B2|A0A1D5P5B2_CHICK Uncharacterized protein OS=Gallus gallus OX=9031 GN=IVD PE=3 SV=1	1	5	5	5	12.8	45.845	422	13.383	0.979798	1.08297	1.04	0.842319	0.896061	0.897089	1.19525	0.958429	1.0029	0.982631	1.06254	1.06001
A0A1D5P5D9;A0A3Q2UIB1;A0A1D5NVZ1	A0A1D5P5D9;A0A3Q2UIB1;A0A1D5NVZ1	tr|A0A1D5P5D9|A0A1D5P5D9_CHICK Uncharacterized protein OS=Gallus gallus OX=9031 GN=FAM120A PE=4 SV=2;tr|A0A3Q2UIB1|A0A3Q2UIB1_CHICK Uncharacterized protein OS=Gallus gallus OX=9031 GN=FAM120A PE=4 SV=1;tr|A0A1D5NVZ1|A0A1D5NVZ1_CHICK Uncharacterized protein	3	2	2	2	1.9	117.86	1073	1.8708	1.05756	0.9638	0.365145	0.0309537	1.893	0.23734	1.95723	0.0427594	3.14946	0.954262	1.10044	0.248051
A0A1D5P5L5	A0A1D5P5L5	tr|A0A1D5P5L5|A0A1D5P5L5_CHICK Methyltransf_11 domain-containing protein OS=Gallus gallus OX=9031 GN=LOC107048987 PE=4 SV=1	1	3	3	3	11.1	30.318	271	10.136	1.14033		1.2413	0.974313		1.10824	0.824448		0.793341	1.06091		0.857111
A0A1D5P5M6;E1BQD1	A0A1D5P5M6;E1BQD1	tr|A0A1D5P5M6|A0A1D5P5M6_CHICK Uncharacterized protein OS=Gallus gallus OX=9031 GN=GATD3A PE=4 SV=1;tr|E1BQD1|E1BQD1_CHICK Uncharacterized protein OS=Gallus gallus OX=9031 GN=GATD3A PE=4 SV=4	2	12	12	11	44.1	26.794	247	129.46	0.852918	1.02131	1.0871	1.15898	1.06442	1.03294	1.10606	1.09302	1.09855	0.882046	0.821252	0.781405
A0A1D5P5T1	A0A1D5P5T1	tr|A0A1D5P5T1|A0A1D5P5T1_CHICK Eukaryotic translation initiation factor 3 subunit K OS=Gallus gallus OX=9031 GN=EIF3K PE=3 SV=2	1	3	3	3	12.8	25.13	218	2.884		1.1094	1.04618		0.92813	0.982111		0.929353	0.927205		1.03312	1.04451
A0A1D5P5X1	A0A1D5P5X1	tr|A0A1D5P5X1|A0A1D5P5X1_CHICK Uncharacterized protein OS=Gallus gallus OX=9031 GN=RCN2 PE=4 SV=2	1	2	2	2	4.6	35.711	303	1.6566	0.956658	1.5089	1.02651	1.06495	1.03653	0.878927	0.795868	0.69574	0.93809	1.18252	0.75883	1.15647
A0A1D5P5Z0;P09643	A0A1D5P5Z0;P09643	tr|A0A1D5P5Z0|A0A1D5P5Z0_CHICK Tubulin alpha chain OS=Gallus gallus OX=9031 GN=TUBA8A PE=3 SV=2;sp|P09643|TBA4_CHICK Tubulin alpha-4 chain (Fragment) OS=Gallus gallus OX=9031 PE=3 SV=1	2	10	4	3	25.1	50.107	447	48.91	0.931963	1.43403	0.800829	1.01456	0.718067	1.16994	0.987862	0.977572	1.14538	1.06561	0.87033	0.883853
A0A1D5P600;Q90WH5	A0A1D5P600;Q90WH5	tr|A0A1D5P600|A0A1D5P600_CHICK Uncharacterized protein OS=Gallus gallus OX=9031 GN=MYH7 PE=3 SV=1;tr|Q90WH5|Q90WH5_CHICK Atrial myosin heacy chain OS=Gallus gallus OX=9031 PE=2 SV=1	2	65	2	2	28.4	221.82	1931	51.784		0.967514	0.795503		0.895693	1.10639		1.19245	1.18774		0.944343	0.910373
A0A1D5P603;Q90910;Q9PSR7;A0A3Q2TT97	A0A1D5P603	tr|A0A1D5P603|A0A1D5P603_CHICK Uncharacterized protein OS=Gallus gallus OX=9031 GN=MYH1F PE=3 SV=1	4	179	36	2	68.4	223.01	1939	323.31	0.662138	0.812214	1.80987	1.10726	1.11418	0.674981	0.874624	0.542049	0.601681	1.35597	1.53156	0.913464
A0A1D5P628	A0A1D5P628	tr|A0A1D5P628|A0A1D5P628_CHICK Uncharacterized protein OS=Gallus gallus OX=9031 GN=HSPBP1 PE=4 SV=1	1	2	2	2	8.8	35.742	330	48.661	1.09526	0.63721	1.04491	0.956289	1.07793	0.883635	0.875237	0.936461	0.928164	1.07321	1.3484	1.14329
A0A1D5P6F4	A0A1D5P6F4	tr|A0A1D5P6F4|A0A1D5P6F4_CHICK Uncharacterized protein OS=Gallus gallus OX=9031 GN=FCGBPL PE=4 SV=2	1	8	8	8	3.7	289.27	2648	17.254	1.13354	1.19505	0.96991	0.951575	0.789085	0.894884	0.728635	0.981316	1.04037	1.18625	1.03455	1.09484
A0A1D5P6V5;A0A3Q2UKL3	A0A1D5P6V5;A0A3Q2UKL3	tr|A0A1D5P6V5|A0A1D5P6V5_CHICK Perilipin OS=Gallus gallus OX=9031 GN=PLIN4 PE=3 SV=1;tr|A0A3Q2UKL3|A0A3Q2UKL3_CHICK Perilipin OS=Gallus gallus OX=9031 GN=PLIN5 PE=3 SV=1	2	6	6	6	14.5	45.388	429	21.421	1.22224	1.04832	1.14441	0.907451	1.02277	0.874746	0.956616	1.03207	0.99565	0.913692	0.896837	0.985189
A0A1D5P6W1;A0A3Q2UBM2	A0A1D5P6W1;A0A3Q2UBM2	tr|A0A1D5P6W1|A0A1D5P6W1_CHICK Uncharacterized protein OS=Gallus gallus OX=9031 GN=COL5A2 PE=4 SV=2;tr|A0A3Q2UBM2|A0A3Q2UBM2_CHICK Uncharacterized protein OS=Gallus gallus OX=9031 GN=COL5A2 PE=4 SV=1	2	2	2	2	1.2	141.72	1467	2.6495	1.67065	0.981034	1.20623	0.723658	0.983685	0.912165	0.831919	1.12368	0.85176	0.773773	0.911597	1.02985
A0A1D5P763;A0A1D5NUH1;A0A182C605;A0A3Q2UGW4;A0A3Q2TSF9;A0A182C5V6	A0A1D5P763;A0A1D5NUH1;A0A182C605	tr|A0A1D5P763|A0A1D5P763_CHICK PITH domain-containing protein OS=Gallus gallus OX=9031 GN=TXNL1 PE=4 SV=1;tr|A0A1D5NUH1|A0A1D5NUH1_CHICK PITH domain-containing protein OS=Gallus gallus OX=9031 GN=TXNL1 PE=4 SV=1;tr|A0A182C605|A0A182C605_CHICK Z-linked thio	6	5	5	5	27.1	32.448	288	45.316	1.39792	1.24023	0.946084	0.82882	0.904187	1.04783	0.891641	0.938196	1.05955	0.881624	0.917385	0.946528
A0A1D5P7C6	A0A1D5P7C6	tr|A0A1D5P7C6|A0A1D5P7C6_CHICK Peptidase_M24 domain-containing protein OS=Gallus gallus OX=9031 GN=PA2G4 PE=4 SV=1	1	11	11	11	31.7	43.779	394	70.406	0.920322	1.00182	1.02241	1.03773	0.982723	0.936908	0.900102	0.932952	0.942669	1.14184	1.08251	1.09802
A0A1D5P7Q4	A0A1D5P7Q4	tr|A0A1D5P7Q4|A0A1D5P7Q4_CHICK Coronin OS=Gallus gallus OX=9031 GN=CORO7 PE=3 SV=2	1	1	1	1	0.9	128.59	1189	3.7363	1.02134	0.862079	0.851245	0.780877	0.931893	0.849705	0.636862	0.785198	0.896478	1.56092	1.42083	1.40257
A0A1D5P7R1;Q90706	A0A1D5P7R1;Q90706	tr|A0A1D5P7R1|A0A1D5P7R1_CHICK Uncharacterized protein OS=Gallus gallus OX=9031 GN=C5H14orf166 PE=4 SV=1;tr|Q90706|Q90706_CHICK CLE7 OS=Gallus gallus OX=9031 GN=CLE7 PE=2 SV=1	2	6	6	6	20.1	28.02	244	6.2103	0.647025	0.867647	1.00202	1.09648	1.08478	1.00249	1.18754	0.982728	1.0242	1.06896	1.06484	0.971287
A0A1D5P7Y8;A0A1D5PXH0;A0A1D5NZQ6;A0A1D5P8N3	A0A1D5P7Y8;A0A1D5PXH0;A0A1D5NZQ6;A0A1D5P8N3	tr|A0A1D5P7Y8|A0A1D5P7Y8_CHICK AP complex subunit beta OS=Gallus gallus OX=9031 GN=AP2B1 PE=3 SV=2;tr|A0A1D5PXH0|A0A1D5PXH0_CHICK AP complex subunit beta OS=Gallus gallus OX=9031 GN=AP1B1 PE=3 SV=2;tr|A0A1D5NZQ6|A0A1D5NZQ6_CHICK Uncharacterized protein OS=	4	4	4	4	3.8	105.65	951	4.723	1.02787	0.729086	1.13702	0.998323	1.10818	0.956094	0.898504	1.01594	0.918864	1.0753	1.14679	0.988019
A0A1D5P810	A0A1D5P810	tr|A0A1D5P810|A0A1D5P810_CHICK Uncharacterized protein OS=Gallus gallus OX=9031 GN=ATP5O PE=3 SV=2	1	7	7	7	32.9	26.639	249	88.965	0.87283	0.84901	0.98321	1.01137	0.976953	0.995032	0.987662	1.04384	0.962057	1.12814	1.1302	1.0597
A0A1D5P813;A0A1D5PNJ9;A0A1D5NVN6;A0A1D5P0Y7;E1BRQ3;A0A3Q2TRT3;F1P3F8;A0A1D5PMR2;A0A1D5NZ81	A0A1D5P813;A0A1D5PNJ9;A0A1D5NVN6;A0A1D5P0Y7;E1BRQ3	tr|A0A1D5P813|A0A1D5P813_CHICK Uncharacterized protein OS=Gallus gallus OX=9031 GN=MAP4K4 PE=4 SV=2;tr|A0A1D5PNJ9|A0A1D5PNJ9_CHICK Uncharacterized protein OS=Gallus gallus OX=9031 GN=MAP4K4 PE=4 SV=2;tr|A0A1D5NVN6|A0A1D5NVN6_CHICK Uncharacterized protein O	9	3	3	2	2.8	119.91	1041	2.5004	1.02275	1.047	1.07824	1.09837	1.19451	0.993398	1.02295	0.985006	1.07263	0.855929	0.773481	0.855726
A0A1D5P822;E1C1T1	A0A1D5P822;E1C1T1	tr|A0A1D5P822|A0A1D5P822_CHICK OCIA domain-containing protein OS=Gallus gallus OX=9031 GN=OCIAD1 PE=4 SV=1;tr|E1C1T1|E1C1T1_CHICK OCIA domain-containing protein OS=Gallus gallus OX=9031 GN=OCIAD1 PE=4 SV=1	2	3	3	3	15	27.387	246	4.2767	1.35804	1.47829	0.854882	0.909745	0.725054	1.00564	0.770534	0.992673	1.13725	0.961685	0.803981	1.00223
A0A1D5P823;A0A3Q2TSI8	A0A1D5P823;A0A3Q2TSI8	tr|A0A1D5P823|A0A1D5P823_CHICK Uncharacterized protein OS=Gallus gallus OX=9031 GN=CRELD1 PE=4 SV=2;tr|A0A3Q2TSI8|A0A3Q2TSI8_CHICK Uncharacterized protein OS=Gallus gallus OX=9031 GN=CRELD1 PE=4 SV=1	2	2	2	2	6.2	48.845	455	7.6535		0.775366	1.05725		1.07792	1.06258		1.16395	0.996267		0.982764	0.883897
A0A1D5P856	A0A1D5P856	tr|A0A1D5P856|A0A1D5P856_CHICK STAS domain-containing protein OS=Gallus gallus OX=9031 GN=HDHD2 PE=4 SV=1	1	2	2	2	11.2	28.326	259	8.3587	1.33079	1.16718	0.941194	0.89862	1.10909	0.882579	1.00345	0.823653	1.32696	0.767147	0.900072	0.849271
A0A1D5P888;A0A1L1RXL4;Q9PSQ6	A0A1D5P888	tr|A0A1D5P888|A0A1D5P888_CHICK Serine/threonine-protein phosphatase OS=Gallus gallus OX=9031 GN=PPP1CA PE=3 SV=2	3	8	8	2	27.1	39.101	347	50.767	0.983602	1.04364	0.881156	1.13991	0.890676	1.12701	0.957009	1.10722	1.06545	0.919483	0.958461	0.926383
A0A1D5P893;A0A1D5PAH2;A0A1D5PD11;A0A3Q2UHA5;F1NPL2;E1BVU6;A0A3Q2UHV4;A0A3Q2UJT5;A0A3Q2TXK0;A0A3Q2UCM1	A0A1D5P893;A0A1D5PAH2;A0A1D5PD11	tr|A0A1D5P893|A0A1D5P893_CHICK Uncharacterized protein OS=Gallus gallus OX=9031 GN=LOC426023 PE=4 SV=2;tr|A0A1D5PAH2|A0A1D5PAH2_CHICK Uncharacterized protein OS=Gallus gallus OX=9031 GN=LOC426023 PE=4 SV=2;tr|A0A1D5PD11|A0A1D5PD11_CHICK Uncharacterized pro	10	9	9	9	32.1	34.832	330	78.421	0.885425	0.98944	1.05536	1.0448	0.96169	0.985783	1.06237	1.03783	0.968667	1.0074	1.01104	0.990189
A0A1D5P8F9	A0A1D5P8F9	tr|A0A1D5P8F9|A0A1D5P8F9_CHICK Saposin B-type domain-containing protein OS=Gallus gallus OX=9031 GN=CNPY2 PE=4 SV=2	1	2	2	2	8.9	21.189	190	1.6708	1.50449		0.968536	0.690789		0.87746	0.815254		1.00887	0.98947		1.14514
A0A1D5P8H7;Q5ZIV8	A0A1D5P8H7	tr|A0A1D5P8H7|A0A1D5P8H7_CHICK Importin N-terminal domain-containing protein OS=Gallus gallus OX=9031 GN=XPO1 PE=4 SV=1	2	5	5	5	5.1	123.16	1071	11.988	1.20875	1.17534	1.0041	0.858676	0.922749	1.13712	1.05559	1.02477	0.931468	0.876982	0.877142	0.927314
A0A1D5P8I3;Q91017;REV__E1C7W8;REV__A0A3Q3AYE3;REV__A0A3Q3AND3;REV__A0A3Q2UE54;REV__A0A3Q2U5W9;REV__A0A3Q2U6L4	A0A1D5P8I3	tr|A0A1D5P8I3|A0A1D5P8I3_CHICK Uncharacterized protein OS=Gallus gallus OX=9031 GN=SFPQ PE=4 SV=2	8	7	7	6	14.1	69.532	647	19.274	1.00314	0.901541	1.03776	0.935022	1.04062	0.993898	1.0042	0.989036	0.880085	1.05764	1.0688	1.08825
A0A1D5P909	A0A1D5P909	tr|A0A1D5P909|A0A1D5P909_CHICK PDZ domain-containing protein OS=Gallus gallus OX=9031 GN=LDB3 PE=4 SV=2	1	18	18	18	65.7	31.17	283	323.31	0.813267	0.909592	0.894967	1.13231	0.962672	1.08078	1.09651	1.11876	1.03538	0.95792	1.00898	0.988874
A0A1D5P918;E1BWZ3	A0A1D5P918;E1BWZ3	tr|A0A1D5P918|A0A1D5P918_CHICK Ig-like domain-containing protein OS=Gallus gallus OX=9031 GN=NEXN PE=4 SV=2;tr|E1BWZ3|E1BWZ3_CHICK Ig-like domain-containing protein OS=Gallus gallus OX=9031 GN=NEXN PE=4 SV=4	2	3	3	3	6.5	71.059	598	17.174	0.900663	0.934782	1.33567	0.960017	0.910174	0.662921	0.844885	0.958112	0.647726	1.29443	1.19693	1.35368
A0A1D5P984;Q90577	A0A1D5P984;Q90577	tr|A0A1D5P984|A0A1D5P984_CHICK Sarcalumenin OS=Gallus gallus OX=9031 GN=SRL PE=3 SV=1;sp|Q90577|SRCA_CHICK Sarcalumenin OS=Gallus gallus OX=9031 GN=SRL PE=2 SV=1	2	18	1	1	43.2	54.263	472	4.7354	1.15629	0.977815	0.885605	0.870078	0.865829	0.921474	0.853677	0.939275	0.96496	1.11996	1.21708	1.22796
A0A1D5P9I3;A0A1D5PLP8;A0A1D5PG36;Q5ZKN9	A0A1D5P9I3;A0A1D5PLP8;A0A1D5PG36;Q5ZKN9	tr|A0A1D5P9I3|A0A1D5P9I3_CHICK Isocitrate dehydrogenase [NAD] subunit, mitochondrial OS=Gallus gallus OX=9031 GN=IDH3B PE=3 SV=2;tr|A0A1D5PLP8|A0A1D5PLP8_CHICK Isocitrate dehydrogenase [NAD] subunit, mitochondrial OS=Gallus gallus OX=9031 GN=IDH3B PE=3 SV=	4	6	6	6	18.2	40.489	369	35.361	1.12918	1.07426	0.996723	0.908277	0.973197	0.918625	0.993464	1.00936	1.05151	0.969083	0.943186	1.03314
A0A1D5P9J0	A0A1D5P9J0	tr|A0A1D5P9J0|A0A1D5P9J0_CHICK LAM_G_DOMAIN domain-containing protein OS=Gallus gallus OX=9031 GN=COL15A1 PE=4 SV=1	1	4	4	4	3.4	118.74	1134	2.5257	1.23877	0.921853	1.17469	0.990164	1.05894	1.00858	0.892217	1.24253	0.955781	0.878853	0.776676	0.860954
A0A1D5P9K6;Q5ZK70;A0A1D5P6J0	A0A1D5P9K6;Q5ZK70;A0A1D5P6J0	tr|A0A1D5P9K6|A0A1D5P9K6_CHICK Uncharacterized protein OS=Gallus gallus OX=9031 GN=ACADSB PE=3 SV=2;tr|Q5ZK70|Q5ZK70_CHICK Uncharacterized protein OS=Gallus gallus OX=9031 GN=RCJMB04_12m17 PE=2 SV=1;tr|A0A1D5P6J0|A0A1D5P6J0_CHICK Uncharacterized protein OS	3	2	2	2	5.2	47.292	427	11.652		1.19835	0.908041		0.864473	1.00169		1.01116	0.921924		0.926019	1.16835
A0A1D5P9V0;P00548;REV__A0A1D5PIB6	A0A1D5P9V0;P00548	tr|A0A1D5P9V0|A0A1D5P9V0_CHICK Pyruvate kinase OS=Gallus gallus OX=9031 GN=PKM PE=3 SV=2;sp|P00548|KPYM_CHICK Pyruvate kinase PKM OS=Gallus gallus OX=9031 GN=PKM PE=2 SV=2	3	42	42	5	72.4	60.378	550	323.31	1.00282	1.02487	0.975156	1.08184	1.02066	1.06745	1.00935	1.07187	1.08693	0.90598	0.882611	0.870464
A0A1D5P9X2;A0A3Q3ACB9;A0A3Q2U8I1;Q9PST0;Q9PSS9	A0A1D5P9X2;A0A3Q3ACB9;A0A3Q2U8I1	tr|A0A1D5P9X2|A0A1D5P9X2_CHICK Tropomyosin beta chain OS=Gallus gallus OX=9031 GN=TPM2 PE=3 SV=2;tr|A0A3Q3ACB9|A0A3Q3ACB9_CHICK Tropomyosin beta chain OS=Gallus gallus OX=9031 GN=TPM2 PE=3 SV=1;tr|A0A3Q2U8I1|A0A3Q2U8I1_CHICK Tropomyosin beta chain OS=Gallu	5	31	2	0	59.5	35.635	311	14.947	1.71953	1.69182	0.895212	0.914499	0.678892	0.979939	0.756815	0.877778	0.882387	0.609153	0.751512	1.24246
A0A1D5PA28	A0A1D5PA28	tr|A0A1D5PA28|A0A1D5PA28_CHICK Methyltransf_11 domain-containing protein OS=Gallus gallus OX=9031 GN=METTL7A PE=4 SV=1	1	2	2	2	7.7	27.918	246	5.6182	0.803575		0.944022	1.13877		1.18911	0.977904		1.0274	1.07976		0.839473
A0A1D5PA34;A0A1D5PAR5;P09645;F1P5B0;P09642;A0A1D5NXC9	A0A1D5PA34;A0A1D5PAR5;P09645;F1P5B0;P09642	tr|A0A1D5PA34|A0A1D5PA34_CHICK Tubulin alpha chain OS=Gallus gallus OX=9031 GN=TUBA3E PE=3 SV=1;tr|A0A1D5PAR5|A0A1D5PAR5_CHICK Tubulin alpha chain OS=Gallus gallus OX=9031 GN=TUBA3E PE=3 SV=1;sp|P09645|TBA8_CHICK Tubulin alpha-8 chain (Fragment) OS=Gallus	6	11	2	2	33.8	46.417	417	5.8407	0.833187		0.956035	0.974269		1.01035	0.952531		1.11617	1.24001		0.917445
A0A1D5PAE4	A0A1D5PAE4	tr|A0A1D5PAE4|A0A1D5PAE4_CHICK PWWP domain-containing protein OS=Gallus gallus OX=9031 GN=HDGFL1 PE=4 SV=1	1	6	6	6	30.2	26.248	232	9.8286	1.19943	1.09258	1.05581	1.05544	1.12969	0.927474	0.818666	0.949541	0.945534	0.926465	0.828189	1.07118
A0A1D5PAN0	A0A1D5PAN0	tr|A0A1D5PAN0|A0A1D5PAN0_CHICK LRRNT domain-containing protein OS=Gallus gallus OX=9031 GN=PRELP PE=4 SV=2	1	4	4	4	11.9	48.976	430	55.795	0.829923	1.15745	1.09119	1.05153	0.742353	1.05465	1.22106	1.2324	0.986162	0.897488	0.867791	0.868
A0A1D5PAN4;A0A3Q2U926;A0A1D5NWS0;A0A3Q2U4L5	A0A1D5PAN4;A0A3Q2U926;A0A1D5NWS0	tr|A0A1D5PAN4|A0A1D5PAN4_CHICK Asp-B-Hydro_N domain-containing protein OS=Gallus gallus OX=9031 GN=ASPH PE=4 SV=2;tr|A0A3Q2U926|A0A3Q2U926_CHICK Asp-B-Hydro_N domain-containing protein OS=Gallus gallus OX=9031 GN=ASPH PE=4 SV=1;tr|A0A1D5NWS0|A0A1D5NWS0_CHI	4	3	3	2	21.4	31.276	281	69.865	0.53843	0.608712	0.992757	1.24056	1.28584	0.949488	1.23241	1.02837	1.08108	0.988602	1.07707	0.976677
A0A1D5PAP1;A0A3Q3AQY4;A0A1D5PRH6;A0A1D5P043;A0A1D5PHG0	A0A1D5PAP1;A0A3Q3AQY4;A0A1D5PRH6;A0A1D5P043;A0A1D5PHG0	tr|A0A1D5PAP1|A0A1D5PAP1_CHICK Uncharacterized protein OS=Gallus gallus OX=9031 GN=EML1 PE=4 SV=2;tr|A0A3Q3AQY4|A0A3Q3AQY4_CHICK Uncharacterized protein OS=Gallus gallus OX=9031 GN=EML1 PE=4 SV=1;tr|A0A1D5PRH6|A0A1D5PRH6_CHICK Uncharacterized protein OS=Ga	5	6	6	6	7.3	93.431	848	10.653	0.961115	1.01239	1.05113	1.04583	1.07362	0.982476	1.01877	0.940494	1.01074	0.974286	0.973487	0.955654
A0A1D5PAU7	A0A1D5PAU7	tr|A0A1D5PAU7|A0A1D5PAU7_CHICK M20_dimer domain-containing protein OS=Gallus gallus OX=9031 GN=ACY1 PE=4 SV=1	1	6	6	6	17.2	45.909	413	18.674	0.882687	0.997463	0.988048	1.04169	1.02434	0.942342	1.1084	1.05688	1.14508	0.967228	0.921315	0.924534
A0A1D5PBA6;E1BQQ5	A0A1D5PBA6;E1BQQ5	tr|A0A1D5PBA6|A0A1D5PBA6_CHICK Uncharacterized protein OS=Gallus gallus OX=9031 GN=DCTN4 PE=4 SV=2;tr|E1BQQ5|E1BQQ5_CHICK Uncharacterized protein OS=Gallus gallus OX=9031 GN=DCTN4 PE=4 SV=4	2	2	2	2	7.2	52.43	460	14.067	1.06239	1.26261	0	0.958168	0.924546	0.797501	1.32061	0.85432	0.617285	0.658839	0.958527	2.58521
A0A1D5PBD2;REV__O42489;REV__A0A1D5PV32	A0A1D5PBD2	tr|A0A1D5PBD2|A0A1D5PBD2_CHICK Uncharacterized protein OS=Gallus gallus OX=9031 GN=ATPIF1 PE=4 SV=3	3	6	6	6	37	10.456	92	6.4219	0.98273	1.01076	1.00649	0.934301	0.98191	0.840764	0.902999	0.990478	1.01105	1.17997	1.01685	1.14169
A0A1D5PBF6;Q5ZLR0	A0A1D5PBF6;Q5ZLR0	tr|A0A1D5PBF6|A0A1D5PBF6_CHICK Uncharacterized protein OS=Gallus gallus OX=9031 GN=FLII PE=4 SV=2;tr|Q5ZLR0|Q5ZLR0_CHICK Uncharacterized protein OS=Gallus gallus OX=9031 GN=RCJMB04_5c11 PE=2 SV=1	2	3	3	3	2.5	140.64	1228	4.7152		1.05725	0.981547		1.15791	1.15085		0.844253	0.908085		0.940592	0.95952
A0A1D5PBI5;Q805F9	A0A1D5PBI5;Q805F9	tr|A0A1D5PBI5|A0A1D5PBI5_CHICK DNA damage-binding protein 1 OS=Gallus gallus OX=9031 GN=DDB1 PE=4 SV=2;sp|Q805F9|DDB1_CHICK DNA damage-binding protein 1 OS=Gallus gallus OX=9031 GN=DDB1 PE=1 SV=1	2	4	4	4	2.8	126.84	1139	4.331	1.73102	1.75992	0.942742	0.726884	0.738118	1.15385	0.727787	0.833276	1.08422	0.814308	0.668684	0.819185
A0A1D5PBJ5;Q5ZHW6;H9L0E7	A0A1D5PBJ5;Q5ZHW6;H9L0E7	tr|A0A1D5PBJ5|A0A1D5PBJ5_CHICK TPR_REGION domain-containing protein OS=Gallus gallus OX=9031 GN=SGTA PE=4 SV=3;tr|Q5ZHW6|Q5ZHW6_CHICK TPR_REGION domain-containing protein OS=Gallus gallus OX=9031 GN=RCJMB04_32j5 PE=2 SV=1;tr|H9L0E7|H9L0E7_CHICK TPR_REGION	3	7	7	7	24	33.813	312	24.81	0.882149	1.22509	1.01743	1.00954	0.922418	0.99988	0.995883	0.876562	0.987507	1.11243	0.975931	0.99518
A0A1D5PBM6;A0A1D5P3B3;A0A1D5PKE1	A0A1D5PBM6;A0A1D5P3B3;A0A1D5PKE1	tr|A0A1D5PBM6|A0A1D5PBM6_CHICK Complex1_49kDa domain-containing protein OS=Gallus gallus OX=9031 GN=NDUFS2 PE=3 SV=2;tr|A0A1D5P3B3|A0A1D5P3B3_CHICK Complex1_49kDa domain-containing protein OS=Gallus gallus OX=9031 GN=NDUFS2 PE=3 SV=2;tr|A0A1D5PKE1|A0A1D5PK	3	5	5	5	6.8	84.612	761	32.281	0.82945	1.17141	1.07148	1.10892	0.943426	0.977065	1.14488	0.973839	1.0513	0.916755	0.911329	0.90015
A0A1D5PBY3;A0A1D5PNR4	A0A1D5PBY3;A0A1D5PNR4	tr|A0A1D5PBY3|A0A1D5PBY3_CHICK Thioredoxin domain-containing protein OS=Gallus gallus OX=9031 GN=PRDX3 PE=4 SV=2;tr|A0A1D5PNR4|A0A1D5PNR4_CHICK Thioredoxin domain-containing protein OS=Gallus gallus OX=9031 GN=PRDX3 PE=4 SV=2	2	6	6	6	34.6	25.761	234	76.299	0.841479	0.855766	0.962956	1.02588	0.996053	0.990075	0.970555	1.03888	1.02357	1.16209	1.1093	1.0234
A0A1D5PC09	A0A1D5PC09	tr|A0A1D5PC09|A0A1D5PC09_CHICK Uncharacterized protein OS=Gallus gallus OX=9031 GN=EPDR1 PE=4 SV=1	1	1	1	1	9.2	13.821	120	6.5736	0.808542	1.07745	0.986995	1.05274	1.06488	0.948972	1.14552	0.882671	1.10852	0.993197	0.974999	0.955512
A0A1D5PC99;Q5ZIX2;F1N9U8	A0A1D5PC99;Q5ZIX2;F1N9U8	tr|A0A1D5PC99|A0A1D5PC99_CHICK ETF domain-containing protein OS=Gallus gallus OX=9031 GN=ETFA PE=4 SV=1;tr|Q5ZIX2|Q5ZIX2_CHICK ETF domain-containing protein OS=Gallus gallus OX=9031 GN=RCJMB04_23a9 PE=2 SV=1;tr|F1N9U8|F1N9U8_CHICK ETF domain-containing pro	3	8	8	8	30.3	34.217	323	54.208	1.01762	0.927208	0.895482	1.02686	0.941355	1.03257	0.958041	1.07371	1.01612	0.997476	1.05773	1.05583
A0A1D5PCH7;P22451	A0A1D5PCH7;P22451	tr|A0A1D5PCH7|A0A1D5PCH7_CHICK 60S ribosomal protein L5 OS=Gallus gallus OX=9031 GN=RPL5 PE=4 SV=1;sp|P22451|RL5_CHICK 60S ribosomal protein L5 OS=Gallus gallus OX=9031 GN=RPL5 PE=2 SV=2	2	6	6	6	23.9	27.772	247	39.663	0.832852	0.861642	0.931768	1.0266	0.847156	0.995491	0.918035	0.975803	0.958944	1.22251	1.3154	1.1138
A0A1D5PCL0	A0A1D5PCL0	tr|A0A1D5PCL0|A0A1D5PCL0_CHICK Uncharacterized protein OS=Gallus gallus OX=9031 GN=RYR3 PE=4 SV=2	1	69	69	2	15.1	552.03	4862	323.31	0.820853	0.919515	0.950363	1.11299	1.04387	1.09557	1.05787	1.01273	1.05774	1.00829	1.02388	0.896326
A0A1D5PCL3;A0A3Q3AWG5;A0A3Q3A8C1;A0A1D5PBR5;E1C5Z5	A0A1D5PCL3;A0A3Q3AWG5;A0A3Q3A8C1;A0A1D5PBR5;E1C5Z5	tr|A0A1D5PCL3|A0A1D5PCL3_CHICK Uncharacterized protein OS=Gallus gallus OX=9031 GN=MYBPC1 PE=4 SV=2;tr|A0A3Q3AWG5|A0A3Q3AWG5_CHICK Uncharacterized protein OS=Gallus gallus OX=9031 GN=MYBPC1 PE=4 SV=1;tr|A0A3Q3A8C1|A0A3Q3A8C1_CHICK Uncharacterized protein O	5	51	1	1	47.8	128.49	1142	2.8138		0.496298	0.706504		1.49447	0.763808		0.613097	0.710557		1.39613	1.81913
A0A1D5PCU1;Q5ZLG7;F1NJ10;Q8AYM3	A0A1D5PCU1;Q5ZLG7;F1NJ10;Q8AYM3	tr|A0A1D5PCU1|A0A1D5PCU1_CHICK Uncharacterized protein OS=Gallus gallus OX=9031 GN=SLC25A5 PE=3 SV=2;tr|Q5ZLG7|Q5ZLG7_CHICK Uncharacterized protein OS=Gallus gallus OX=9031 GN=SLC25A6 PE=2 SV=1;tr|F1NJ10|F1NJ10_CHICK Uncharacterized protein OS=Gallus gallu	4	11	3	3	40.6	32.864	298	2.6235	1.0382		0.84649	0.9343		0.936945	0.98378		1.02796	1.04372		1.18861
A0A1D5PCX2;Q5ZHN1	A0A1D5PCX2;Q5ZHN1	tr|A0A1D5PCX2|A0A1D5PCX2_CHICK Charged multivesicular body protein 2a OS=Gallus gallus OX=9031 GN=CHMP2A PE=4 SV=2;sp|Q5ZHN1|CHM2A_CHICK Charged multivesicular body protein 2a OS=Gallus gallus OX=9031 GN=CHMP2A PE=2 SV=1	2	3	3	3	15.9	24.819	220	37.023	1.11844	0.899109	1.03504	0.956335	0.888086	1.019	0.908821	1.29122	1.00282	1.0164	0.921589	0.943137
A0A1D5PDE6;P16527	A0A1D5PDE6;P16527	tr|A0A1D5PDE6|A0A1D5PDE6_CHICK Myristoylated alanine-rich C-kinase substrate OS=Gallus gallus OX=9031 GN=MARCKS PE=4 SV=1;sp|P16527|MARCS_CHICK Myristoylated alanine-rich C-kinase substrate OS=Gallus gallus OX=9031 GN=MARCKS PE=1 SV=2	2	13	13	13	69	27.643	281	305.79	0.818257	0.816292	1.07162	0.947911	1.01337	0.872492	0.990417	0.916149	0.8386	1.24341	1.25419	1.21728
A0A1D5PDG4;A0A3Q2TWD9	A0A1D5PDG4;A0A3Q2TWD9	tr|A0A1D5PDG4|A0A1D5PDG4_CHICK Uncharacterized protein OS=Gallus gallus OX=9031 GN=GNAS PE=4 SV=2;tr|A0A3Q2TWD9|A0A3Q2TWD9_CHICK Guanine nucleotide-binding protein G(S) subunit alpha XL OS=Gallus gallus OX=9031 GN=GNAS PE=2 SV=1	2	2	2	2	7.7	44.382	379	6.769	0.648622	0.623711	1.11848	1.22693	1.2139	1.03183	1.08913	1.1269	0.979253	1.03531	1.03549	0.870433
A0A1D5PDI2	A0A1D5PDI2	tr|A0A1D5PDI2|A0A1D5PDI2_CHICK Uncharacterized protein OS=Gallus gallus OX=9031 GN=DHRS7C PE=3 SV=1	1	3	3	3	10.6	34.376	311	27.532	0.773846	0.833873	0.902833	1.12317	1.07555	1.15231	1.10929	1.06447	1.03178	0.993701	1.02611	0.913086
A0A1D5PDK5	A0A1D5PDK5	tr|A0A1D5PDK5|A0A1D5PDK5_CHICK Calponin-homology (CH) domain-containing protein OS=Gallus gallus OX=9031 GN=IGSF9 PE=4 SV=3	1	5	5	5	33.7	20.599	184	70.887	0.753476	1.02838	0.847839	1.13087	0.808297	1.16162	1.05781	1.08653	0.917721	1.05785	1.0768	1.07282
A0A1D5PDT3;A0A1D5PU07;E1C784;A0A1D5PJX0;A0A3Q2TVE8;Q98SH2;A0A1D5PFN0;A0A1D5PXJ7	A0A1D5PDT3;A0A1D5PU07;E1C784;A0A1D5PJX0;A0A3Q2TVE8	tr|A0A1D5PDT3|A0A1D5PDT3_CHICK Calcium-transporting ATPase OS=Gallus gallus OX=9031 GN=ATP2B4 PE=3 SV=2;tr|A0A1D5PU07|A0A1D5PU07_CHICK Calcium-transporting ATPase OS=Gallus gallus OX=9031 GN=ATP2B4 PE=3 SV=2;tr|E1C784|E1C784_CHICK Calcium-transporting ATPa	8	6	6	6	7.1	124.08	1125	13.271	0.696714	0.815824	0.806636	1.12768	1.0585	1.18592	1.05896	1.11269	1.13318	1.11665	1.01299	0.874265
A0A1D5PDV6	A0A1D5PDV6	tr|A0A1D5PDV6|A0A1D5PDV6_CHICK Uncharacterized protein OS=Gallus gallus OX=9031 GN=RPS19 PE=4 SV=2	1	6	6	6	40	16.074	145	15.18	0.866473	0.936645	1.04952	0.994389	1.03121	0.958413	0.92483	0.855689	0.897192	1.21431	1.17645	1.09488
A0A1D5PE41	A0A1D5PE41	tr|A0A1D5PE41|A0A1D5PE41_CHICK Uncharacterized protein OS=Gallus gallus OX=9031 GN=NDUFS8 PE=3 SV=1	1	5	5	5	23.4	23.824	209	24.46	0.894463	1.17563	0.949458	1.07662	0.872956	1.01493	1.08837	1.08907	1.13573	0.940543	0.862345	0.899884
A0A1D5PE44;A0A3Q2U3S4	A0A1D5PE44;A0A3Q2U3S4	tr|A0A1D5PE44|A0A1D5PE44_CHICK CortBP2 domain-containing protein OS=Gallus gallus OX=9031 GN=FILIP1 PE=4 SV=2;tr|A0A3Q2U3S4|A0A3Q2U3S4_CHICK CortBP2 domain-containing protein OS=Gallus gallus OX=9031 GN=FILIP1 PE=4 SV=1	2	1	1	1	0.9	134.74	1176	2.8779		1.21077	1.05652		0.927998	1.03497		0.883993	0.966442		0.977236	0.942073
A0A1D5PE65;A0A1D5PHG8;A0A1D5P9Z2;A0A1D5PEM3;F1NG02;A0A1D5PMF5;REV__E1BT81	A0A1D5PE65;A0A1D5PHG8;A0A1D5P9Z2;A0A1D5PEM3;F1NG02;A0A1D5PMF5;REV__E1BT81	tr|A0A1D5PE65|A0A1D5PE65_CHICK Uncharacterized protein OS=Gallus gallus OX=9031 GN=SYNE1 PE=4 SV=2;tr|A0A1D5PHG8|A0A1D5PHG8_CHICK Uncharacterized protein OS=Gallus gallus OX=9031 GN=SYNE1 PE=4 SV=2;tr|A0A1D5P9Z2|A0A1D5P9Z2_CHICK Uncharacterized protein OS=	7	2	2	2	0.2	954.61	8289	2.0093	0.945707	0.779812		1.04997	1.37173		0.981897	0.89492		1.02243	0.953537
A0A1D5PE68	A0A1D5PE68	tr|A0A1D5PE68|A0A1D5PE68_CHICK Cytochrome c oxidase assembly factor 6 OS=Gallus gallus OX=9031 PE=4 SV=2	1	1	1	1	14.3	9.1701	77	5.1511	1.7296		1.05929	0.718096		0.998902	0.719123		1.05542	0.833178		0.886391
A0A1D5PE83	A0A1D5PE83	tr|A0A1D5PE83|A0A1D5PE83_CHICK Uncharacterized protein OS=Gallus gallus OX=9031 GN=PTGES2 PE=3 SV=2	1	3	3	3	6.3	39.617	350	1.6973		0.876901	0.827416		1.07812	0.708526		0.958285	0.837569		1.08669	1.62649
A0A1D5PEB4	A0A1D5PEB4	tr|A0A1D5PEB4|A0A1D5PEB4_CHICK Ubiquitin carboxyl-terminal hydrolase OS=Gallus gallus OX=9031 GN=USP43 PE=3 SV=3	1	1	1	1	1.1	106.6	994	4.3718	1.0161	1.05423	1.11557	1.01627	0.959254	0.871498	0.926967	0.971842	0.938736	1.04066	1.01467	1.07419
A0A1D5PEE1	A0A1D5PEE1	tr|A0A1D5PEE1|A0A1D5PEE1_CHICK Oxysterol-binding protein OS=Gallus gallus OX=9031 GN=OSBP PE=3 SV=2	1	3	3	2	2.9	95.175	859	3.4994	1.03057	0.91516	0.739296	0.750788	1.02147	1.26525	1.38747	0.97498	1.09188	0.831171	1.08839	0.90357
A0A1D5PEK3;O42133	A0A1D5PEK3;O42133	tr|A0A1D5PEK3|A0A1D5PEK3_CHICK Uncharacterized protein OS=Gallus gallus OX=9031 GN=CAPN1 PE=3 SV=2;tr|O42133|O42133_CHICK Mu-calpain large subunit OS=Gallus gallus OX=9031 PE=2 SV=1	2	9	9	9	11.5	81.435	715	34.86	1.23936	1.2785	1.0883	0.968041	0.933279	0.969863	1.02046	1.05746	1.07212	0.772139	0.730764	0.869722
A0A1D5PF07;A0A1D5PM92	A0A1D5PF07	tr|A0A1D5PF07|A0A1D5PF07_CHICK PPM-type phosphatase domain-containing protein OS=Gallus gallus OX=9031 GN=PPM1B PE=2 SV=2	2	3	3	3	11.4	42.734	387	5.6069	1.15407	0.899458	0.998284	0.905664	1.07223	1.07123	1.02669	1.03171	1.03116	0.913567	0.996606	0.899329
A0A1D5PFB7;A0A1D5NXZ4	A0A1D5PFB7;A0A1D5NXZ4	tr|A0A1D5PFB7|A0A1D5PFB7_CHICK Myosin motor domain-containing protein OS=Gallus gallus OX=9031 GN=MYO7L2 PE=3 SV=2;tr|A0A1D5NXZ4|A0A1D5NXZ4_CHICK Myosin motor domain-containing protein OS=Gallus gallus OX=9031 GN=MYO7L2 PE=3 SV=2	2	60	4	0	30.6	193.01	1689	32.984	0.86397	0.336912	1.65279	1.18338	0.50482	0.639485	1.17127	1.90114	0.609299	0.78138	1.25712	1.09843
A0A1D5PFY7	A0A1D5PFY7	tr|A0A1D5PFY7|A0A1D5PFY7_CHICK Succinate-semialdehyde dehydrogenase OS=Gallus gallus OX=9031 GN=ALDH5A1 PE=3 SV=1	1	4	4	4	7.1	57.922	548	12.096	1.20543	1.16691	0.952613	0.800182	0.978093	0.83682	0.893553	0.912986	1.04573	1.10083	0.94201	1.16483
A0A1D5PG13	A0A1D5PG13	tr|A0A1D5PG13|A0A1D5PG13_CHICK Uncharacterized protein OS=Gallus gallus OX=9031 GN=SEC61G PE=3 SV=1	1	1	1	1	17.6	7.7412	68	2.5232		0.923976	0.984325		0.975178	1.00108		1.06144	1.08765		1.0394	0.926939
A0A1D5PGA6;A0A1D5NXK7	A0A1D5PGA6;A0A1D5NXK7	tr|A0A1D5PGA6|A0A1D5PGA6_CHICK Uncharacterized protein OS=Gallus gallus OX=9031 GN=PFDN5 PE=4 SV=1;tr|A0A1D5NXK7|A0A1D5NXK7_CHICK Uncharacterized protein OS=Gallus gallus OX=9031 GN=PFDN5 PE=3 SV=1	2	2	2	2	16	16.306	150	2.5979	0.759096	0.834517		1.21133	0.982501		1.02474	1.13419		1.00484	1.0488
A0A1D5PGH1;P17790	A0A1D5PGH1;P17790	tr|A0A1D5PGH1|A0A1D5PGH1_CHICK Basigin OS=Gallus gallus OX=9031 GN=BSG PE=4 SV=2;sp|P17790|BASI_CHICK Basigin OS=Gallus gallus OX=9031 GN=BSG PE=1 SV=2	2	3	3	3	14	39.823	364	13.806	1.14568	0.973131	1.00167	0.987953	1.06971	0.930721	0.976785	1.02777	1.08429	0.889585	0.929386	0.983326
A0A1D5PGJ1	A0A1D5PGJ1	tr|A0A1D5PGJ1|A0A1D5PGJ1_CHICK Uncharacterized protein OS=Gallus gallus OX=9031 GN=PITPNA PE=4 SV=2	1	3	3	1	17.1	30.112	257	78.621	0.788376	0.885945	1.02163	1.17193	1.0241	1.04375	1.12027	1.13912	1.13749	0.919417	0.950839	0.797124
A0A1D5PGY8	A0A1D5PGY8	tr|A0A1D5PGY8|A0A1D5PGY8_CHICK CS domain-containing protein OS=Gallus gallus OX=9031 GN=PTGES3L PE=4 SV=2	1	2	2	2	15.1	18.146	152	2.0197	1.19436	1.40843	1.10037	0.953497	0.911473	0.841222	1.01002	0.962907	1.14068	0.842118	0.717189	0.917731
A0A1D5PH07;A0A3Q2U811;A0A1D5P4C5;A0A3Q3A5F2;A0A3Q2ULT4;A0A452J876;P38024;A7UEA7;R9PXP8	A0A1D5PH07;A0A3Q2U811;A0A1D5P4C5;A0A3Q3A5F2;A0A3Q2ULT4;A0A452J876;P38024;A7UEA7;R9PXP8	tr|A0A1D5PH07|A0A1D5PH07_CHICK AIRC domain-containing protein OS=Gallus gallus OX=9031 GN=PAICS PE=3 SV=2;tr|A0A3Q2U811|A0A3Q2U811_CHICK AIRC domain-containing protein OS=Gallus gallus OX=9031 GN=PAICS PE=3 SV=1;tr|A0A1D5P4C5|A0A1D5P4C5_CHICK AIRC domain-c	9	3	3	3	4.8	93.958	837	5.1185	0.868169	1.01773	1.0082	0.905372	1.00468	0.891656	1.02788	0.930135	0.977598	1.19857	1.04746	1.12255
A0A1D5PH14;A0A1D5P194	A0A1D5PH14;A0A1D5P194	tr|A0A1D5PH14|A0A1D5PH14_CHICK Dynein light chain roadblock OS=Gallus gallus OX=9031 GN=DYNLRB1 PE=3 SV=2;tr|A0A1D5P194|A0A1D5P194_CHICK Dynein light chain roadblock OS=Gallus gallus OX=9031 GN=DYNLRB2 PE=3 SV=1	2	3	3	3	22.1	10.78	95	8.6755	1.08873	1.08576	0.985992	0.983727	0.868381	1.07313	0.98181	1.08065	1.00259	0.945732	0.965201	0.938283
A0A1D5PH32;A0A1L1RYW9;F1NKF3;A0A1D5PNS4	A0A1D5PH32;A0A1L1RYW9;F1NKF3;A0A1D5PNS4	tr|A0A1D5PH32|A0A1D5PH32_CHICK Gelsolin OS=Gallus gallus OX=9031 GN=GSN PE=4 SV=2;tr|A0A1L1RYW9|A0A1L1RYW9_CHICK Gelsolin OS=Gallus gallus OX=9031 GN=GSN PE=4 SV=2;tr|F1NKF3|F1NKF3_CHICK Gelsolin OS=Gallus gallus OX=9031 GN=GSN PE=4 SV=1;tr|A0A1D5PNS4|A0A1	4	10	10	2	15.1	80.979	730	24.297	1.1165	1.05041	1.01112	0.988751	1.04037	0.987829	0.99816	1.03206	1.01754	0.896587	0.877159	0.983515
A0A1D5PH50;Q5F465	A0A1D5PH50;Q5F465	tr|A0A1D5PH50|A0A1D5PH50_CHICK RBR-type E3 ubiquitin transferase OS=Gallus gallus OX=9031 GN=ARIH1 PE=3 SV=1;tr|Q5F465|Q5F465_CHICK RBR-type E3 ubiquitin transferase OS=Gallus gallus OX=9031 GN=RCJMB04_2l18 PE=2 SV=1	2	4	4	4	7.8	63.838	552	12.209	0.910952	0.895381	1.02805	1.02937	1.12122	0.985646	1.03429	1.00816	1.06227	1.02539	0.975244	0.924034
A0A1D5PH79;A0A3Q2UFU0	A0A1D5PH79;A0A3Q2UFU0	tr|A0A1D5PH79|A0A1D5PH79_CHICK Uncharacterized protein OS=Gallus gallus OX=9031 GN=EHD2 PE=3 SV=2;tr|A0A3Q2UFU0|A0A3Q2UFU0_CHICK Dynamin-type G domain-containing protein OS=Gallus gallus OX=9031 GN=EHD2 PE=3 SV=1	2	2	2	2	5.4	60.561	537	2.4834	0.934996	1.00657	0.936885	1.15479	0.816103	0.969058	0.968641	1.13928	0.935	0.94157	1.03805	1.15906
A0A1D5PHC5;F1NC33;Q04619	A0A1D5PHC5;F1NC33;Q04619	tr|A0A1D5PHC5|A0A1D5PHC5_CHICK Heat shock cognate protein HSP 90-beta OS=Gallus gallus OX=9031 GN=HSP90AB1 PE=3 SV=1;tr|F1NC33|F1NC33_CHICK Heat shock cognate protein HSP 90-beta OS=Gallus gallus OX=9031 GN=HSP90AB1 PE=3 SV=1;sp|Q04619|HS90B_CHICK Heat sho	3	17	5	5	26.4	80.018	694	55.924	1.13057	0.904412	0.916904	0.78318	0.992963	0.943588	0.999321	1.21335	1.34636	1.08693	0.889273	0.79315
A0A1D5PHE2	A0A1D5PHE2	tr|A0A1D5PHE2|A0A1D5PHE2_CHICK Inositol-1-monophosphatase OS=Gallus gallus OX=9031 GN=IMPA1 PE=3 SV=1	1	2	2	2	10.4	30.142	278	11.608	0.797719	0.822593	0.916083	1.14516	1.15674	1.09396	1.12639	1.10044	1.13268	0.930727	0.920226	0.857273
A0A1D5PHE7;G1K2Z4;Q5ZKX6;A0A1L1S0G1	A0A1D5PHE7;G1K2Z4;Q5ZKX6;A0A1L1S0G1	tr|A0A1D5PHE7|A0A1D5PHE7_CHICK NEDD8-conjugating enzyme UBE2F OS=Gallus gallus OX=9031 GN=UBE2F PE=3 SV=1;tr|G1K2Z4|G1K2Z4_CHICK NEDD8-conjugating enzyme UBE2F OS=Gallus gallus OX=9031 GN=UBE2F PE=3 SV=3;sp|Q5ZKX6|UBE2F_CHICK NEDD8-conjugating enzyme UBE2F	4	1	1	1	8.3	13.624	120	15.241	1.26929	1.09886	1.1305	0.922728	1.16901	1.01348	0.959842	0.877079	1.00004	0.848138	0.855051	0.855981
A0A1D5PHJ8;A0A1D5PGQ9;A0A1D5PFB8;A0A1D5PTE2;Q9PTG6;A0A1D5PCQ7	A0A1D5PHJ8;A0A1D5PGQ9;A0A1D5PFB8;A0A1D5PTE2;Q9PTG6;A0A1D5PCQ7	tr|A0A1D5PHJ8|A0A1D5PHJ8_CHICK Dynactin subunit 2 OS=Gallus gallus OX=9031 GN=DCTN2 PE=4 SV=2;tr|A0A1D5PGQ9|A0A1D5PGQ9_CHICK Dynactin subunit 2 OS=Gallus gallus OX=9031 GN=DCTN2 PE=4 SV=1;tr|A0A1D5PFB8|A0A1D5PFB8_CHICK Dynactin subunit 2 OS=Gallus gallus O	6	8	8	8	26.1	42.297	379	48.311	0.983877	0.958019	1.03194	1.01475	1.06612	0.992649	1.0373	0.998571	1.02883	0.964075	0.977295	0.946575
A0A1D5PHJ9;A0A1D5P6M3;A0A3Q2UNP2	A0A1D5PHJ9;A0A1D5P6M3;A0A3Q2UNP2	tr|A0A1D5PHJ9|A0A1D5PHJ9_CHICK Aamy domain-containing protein OS=Gallus gallus OX=9031 GN=GBE1 PE=4 SV=1;tr|A0A1D5P6M3|A0A1D5P6M3_CHICK Aamy domain-containing protein OS=Gallus gallus OX=9031 GN=GBE1 PE=4 SV=2;tr|A0A3Q2UNP2|A0A3Q2UNP2_CHICK Aamy domain-con	3	3	3	3	4.2	79.501	688	11.868	0.886462	0.809091	1.02301	1.08281	1.12182	0.889051	0.967019	1.07177	0.995175	1.06371	0.997324	1.09276
A0A1D5PI06	A0A1D5PI06	tr|A0A1D5PI06|A0A1D5PI06_CHICK Uncharacterized protein OS=Gallus gallus OX=9031 GN=NDUFV2 PE=4 SV=1	1	4	4	4	19.2	26.893	245	43.976	0.906425	0.941352	0.990845	1.14729	0.88625	0.969663	0.985946	1.27463	1.11881	0.960337	0.897765	0.920684
A0A1D5PI23	A0A1D5PI23	tr|A0A1D5PI23|A0A1D5PI23_CHICK Dual specificity protein phosphatase OS=Gallus gallus OX=9031 GN=DUSP3 PE=3 SV=1	1	4	4	4	24.5	20.694	184	27.51	0.769715	0.844229	0.927488	1.0777	1.07687	1.12252	1.0209	0.930674	0.922035	1.13169	1.14823	1.02795
A0A1D5PI89;A0A1D5P9R7;A0A1D5PXK5;A0A3Q2U0I3	A0A1D5PI89;A0A1D5P9R7;A0A1D5PXK5;A0A3Q2U0I3	tr|A0A1D5PI89|A0A1D5PI89_CHICK Calcium-transporting ATPase OS=Gallus gallus OX=9031 GN=ATP2B2 PE=3 SV=2;tr|A0A1D5P9R7|A0A1D5P9R7_CHICK Calcium-transporting ATPase OS=Gallus gallus OX=9031 GN=ATP2B2 PE=3 SV=2;tr|A0A1D5PXK5|A0A1D5PXK5_CHICK Calcium-transport	4	1	1	1	0.7	132.98	1212	4.0947	0.73522	0.76371	0.926537	1.21782	1.11558	1.02659	1.06633	1.17876	1.19619	0.980635	0.941944	0.850677
A0A1D5PIL5;Q5ZMD1;Q5ZM05	A0A1D5PIL5;Q5ZMD1;Q5ZM05	tr|A0A1D5PIL5|A0A1D5PIL5_CHICK 14-3-3 protein theta OS=Gallus gallus OX=9031 GN=YWHAQ PE=3 SV=1;sp|Q5ZMD1|1433T_CHICK 14-3-3 protein theta OS=Gallus gallus OX=9031 GN=YWHAQ PE=1 SV=1;tr|Q5ZM05|Q5ZM05_CHICK 14_3_3 domain-containing protein (Fragment) OS=Gal	3	10	5	5	45.3	27.205	236	38.329	1.0136	0.954297	0.960994	0.865477	0.839294	0.884123	0.990288	1.08538	1.0507	1.13063	1.12103	1.10418
A0A1D5PIS6;A0A1D5NY19;A0A3Q2U744;A0A3Q2UH88;A0A3Q2U1N2	A0A1D5PIS6;A0A1D5NY19;A0A3Q2U744;A0A3Q2UH88;A0A3Q2U1N2	tr|A0A1D5PIS6|A0A1D5PIS6_CHICK Uncharacterized protein OS=Gallus gallus OX=9031 GN=LOC107049500 PE=4 SV=2;tr|A0A1D5NY19|A0A1D5NY19_CHICK Uncharacterized protein OS=Gallus gallus OX=9031 GN=LOC107050261 PE=4 SV=2;tr|A0A3Q2U744|A0A3Q2U744_CHICK Uncharacteriz	5	2	2	2	6.4	30.55	280	2.2096	1.3946	1.00607	1.15262	1.1064	0.910446	1.13748	0.556465	1.37955	0.825242	0.942531	0.703925	0.884656
A0A1D5PIZ1;A0A1L1RUL3	A0A1D5PIZ1;A0A1L1RUL3	tr|A0A1D5PIZ1|A0A1D5PIZ1_CHICK Peptidase_M3 domain-containing protein OS=Gallus gallus OX=9031 GN=THOP1 PE=3 SV=1;tr|A0A1L1RUL3|A0A1L1RUL3_CHICK Peptidase_M3 domain-containing protein OS=Gallus gallus OX=9031 GN=THOP1 PE=3 SV=2	2	5	5	5	7.9	78.308	685	16.442	0.840176	0.969464	1.07276	1.13347	1.01133	1.0226	1.01029	1.08801	1.0177	1.01606	0.931189	0.886945
A0A1D5PIZ8	A0A1D5PIZ8	tr|A0A1D5PIZ8|A0A1D5PIZ8_CHICK Uncharacterized protein OS=Gallus gallus OX=9031 GN=IQGAP3 PE=4 SV=1	1	4	4	3	3.1	189.62	1658	4.6659	1.90279	1.37459		0.768836	0.834539		0.686355	0.996556		0.642017	0.794311
A0A1D5PJ03	A0A1D5PJ03	tr|A0A1D5PJ03|A0A1D5PJ03_CHICK Uncharacterized protein OS=Gallus gallus OX=9031 GN=NT5DC2 PE=4 SV=1	1	2	2	2	6.3	65.775	572	7.1551	0.815688	1.19688	1.00194	0.85464	0.849873	1.01221	0.908192	0.735833	0.951389	1.42148	1.21741	1.03446
A0A1D5PJ08;Q9I9K4	A0A1D5PJ08	tr|A0A1D5PJ08|A0A1D5PJ08_CHICK Uncharacterized protein OS=Gallus gallus OX=9031 GN=NID1 PE=4 SV=3	2	18	18	18	20.9	126.52	1153	188.99	1.18444	1.0882	1.11623	0.992409	1.02232	1.05989	0.982538	1.0392	0.979021	0.840613	0.85028	0.844865
A0A1D5PJ40;A0A1D5PL88;Q5ZKH1;Q5ZHR7;A0A3Q2UEA7;A0A3Q2TVE4;A0A3Q2U5N2	A0A1D5PJ40;A0A1D5PL88;Q5ZKH1;Q5ZHR7;A0A3Q2UEA7;A0A3Q2TVE4;A0A3Q2U5N2	tr|A0A1D5PJ40|A0A1D5PJ40_CHICK Clathrin light chain OS=Gallus gallus OX=9031 GN=CLTB PE=3 SV=1;tr|A0A1D5PL88|A0A1D5PL88_CHICK Clathrin light chain OS=Gallus gallus OX=9031 GN=CLTB PE=3 SV=1;tr|Q5ZKH1|Q5ZKH1_CHICK Clathrin light chain OS=Gallus gallus OX=90	7	2	2	2	8.1	23.121	210	3.2501	0.751325	0.748566	1.10546	1.01564	1.0632	0.953189	0.915025	0.959106	0.837111	1.31801	1.22913	1.10424
A0A1D5PJ54	A0A1D5PJ54	tr|A0A1D5PJ54|A0A1D5PJ54_CHICK Uncharacterized protein OS=Gallus gallus OX=9031 PE=4 SV=2	1	1	1	1	14	14.166	136	28.434	0.911983	0.649823	1.05853	1.50651	1.12815	0.889397	0.860765	1.20919	1.02599	0.72074	1.01283	1.02608
A0A1D5PJ79;P05300	A0A1D5PJ79;P05300	tr|A0A1D5PJ79|A0A1D5PJ79_CHICK Lysosome-associated membrane glycoprotein 1 OS=Gallus gallus OX=9031 GN=LAMP1 PE=3 SV=2;sp|P05300|LAMP1_CHICK Lysosome-associated membrane glycoprotein 1 OS=Gallus gallus OX=9031 GN=LAMP1 PE=2 SV=1	2	3	3	3	6.7	43.863	406	3.8918	0.858201	0.91534	1.00878	1.07734	1.05925	1.07854	0.980002	0.988123	0.983939	1.08445	1.03729	0.928746
A0A1D5PJG4;Q5ZLH7;F1NZU2	A0A1D5PJG4;Q5ZLH7;F1NZU2	tr|A0A1D5PJG4|A0A1D5PJG4_CHICK Uncharacterized protein OS=Gallus gallus OX=9031 GN=SYNCRIP PE=4 SV=1;tr|Q5ZLH7|Q5ZLH7_CHICK Uncharacterized protein OS=Gallus gallus OX=9031 GN=RCJMB04_6c17 PE=2 SV=1;tr|F1NZU2|F1NZU2_CHICK Uncharacterized protein OS=Gallus	3	8	8	1	16	62.677	562	48.129	0.950756	0.95077	1.09229	1.05204	1.02735	0.930978	0.98576	1.02861	0.993102	1.01145	0.993277	0.983629
A0A1D5PJG9;A0A1L1RZJ6;A0A182C637;A0A1D5P3S4	A0A1D5PJG9;A0A1L1RZJ6;A0A182C637;A0A1D5P3S4	tr|A0A1D5PJG9|A0A1D5PJG9_CHICK ATP synthase subunit alpha OS=Gallus gallus OX=9031 GN=ATP5A1W PE=3 SV=2;tr|A0A1L1RZJ6|A0A1L1RZJ6_CHICK ATP synthase subunit alpha OS=Gallus gallus OX=9031 GN=ATP5A1W PE=3 SV=2;tr|A0A182C637|A0A182C637_CHICK ATP synthase subu	4	25	1	1	49.4	59.256	543	-2	0.634762	0.836209	1.04094	1.0762	1.06785	0.887861	1.1011	0.922915	0.925861	1.18794	1.17302	1.14534
A0A1D5PJH5;A0A1D5PW75;A0A1D5PAU8;A0A1D5PDC1;A0A1D5P650	A0A1D5PJH5;A0A1D5PW75;A0A1D5PAU8;A0A1D5PDC1;A0A1D5P650	tr|A0A1D5PJH5|A0A1D5PJH5_CHICK Clathrin heavy chain OS=Gallus gallus OX=9031 GN=CLTCL1 PE=3 SV=2;tr|A0A1D5PW75|A0A1D5PW75_CHICK Clathrin heavy chain OS=Gallus gallus OX=9031 GN=CLTCL1 PE=3 SV=1;tr|A0A1D5PAU8|A0A1D5PAU8_CHICK Clathrin heavy chain OS=Gallus	5	8	3	3	5.2	182.81	1598	7.9818	1.16897	0.675882	0.976202	0.770399	0.476651	0.893363	1.0965	1.0445	0.97537	0.964124	1.80297	1.15506
A0A1D5PJI9	A0A1D5PJI9	tr|A0A1D5PJI9|A0A1D5PJI9_CHICK Uncharacterized protein OS=Gallus gallus OX=9031 GN=VPS13A PE=4 SV=2	1	2	2	2	0.6	360.66	3193	3.0953	1.28181	1.25274	1.26449	0.803009	0.870031	0.851887	1.02636	1.02338	0.915449	0.888819	0.853857	0.968177
[truncated: 1,227 more rows]
