# Supplementary material for: Comprehensive Proteomic Characterization of the Pectoralis Major at Three Chronological Ages in Beijing-You Chicken
Source: Front Physiol. 2021 Mar 18;12:658711. doi: 10.3389/fphys.2021.658711 (PMC8012914; doi:10.3389/fphys.2021.658711)
Supplement: Supplementary Table 2 — Differentially expressed proteins for 120 d vs 90 d, 150 d vs 120 d, and 150 d vs 90 d. [file Table_2.xlsx]

## Sheet: 120 d vs. 90 d
Protein IDs	Majority protein IDs	Fasta headers	Number of proteins	Peptides	Razor + unique peptides	Unique peptides	Sequence coverage [%]	Mol. weight [kDa]	Sequence length	Score	Ratio AX1	Ratio AX2	Ratio AX3	Ratio BX1	Ratio BX2	Ratio BX3	FC	P.value
A0A0A0MQ61;Q9W6J3;A0A1D5NT70	A0A0A0MQ61;Q9W6J3;A0A1D5NT70	tr|A0A0A0MQ61|A0A0A0MQ61_CHICK Uncharacterized protein OS=Gallus gallus OX=9031 GN=GSTAL2 PE=4 SV=1;tr|Q9W6J3|Q9W6J3_CHICK Glutathione S-transferase class-alpha (Fragment) OS=Gallus gallus OX=9031 PE=2 SV=1;tr|A0A1D5NT70|A0A1D5NT70_CHICK Uncharacterized pr	3	3	3	3	15.8	25.222	221	4.2907	0.656045	0.568356	0.949177	1.09739	1.00101	1.07997	1.46227	0.0479783
A0A1D5P0B5	A0A1D5P0B5	tr|A0A1D5P0B5|A0A1D5P0B5_CHICK BTB domain-containing protein OS=Gallus gallus OX=9031 GN=KLHL41 PE=4 SV=1	1	19	19	19	31.2	68.552	606	213.63	0.662984	0.743428	0.861061	1.07187	0.92626	1.07056	1.35335	0.0236847
A0A1D5P2Y6	A0A1D5P2Y6	tr|A0A1D5P2Y6|A0A1D5P2Y6_CHICK Uncharacterized protein OS=Gallus gallus OX=9031 GN=PBXIP1 PE=4 SV=1	1	7	7	7	16.4	67.263	622	61.604	0.752765	0.789411	0.936656	1.11561	1.03519	1.03242	1.28416	0.0197965
A0A1D5P909	A0A1D5P909	tr|A0A1D5P909|A0A1D5P909_CHICK PDZ domain-containing protein OS=Gallus gallus OX=9031 GN=LDB3 PE=4 SV=2	1	18	18	18	65.7	31.17	283	323.31	0.813267	0.909592	0.894967	1.13231	0.962672	1.08078	1.21313	0.0335199
A0A1D5PCL0	A0A1D5PCL0	tr|A0A1D5PCL0|A0A1D5PCL0_CHICK Uncharacterized protein OS=Gallus gallus OX=9031 GN=RYR3 PE=4 SV=2	1	69	69	2	15.1	552.03	4862	323.31	0.820853	0.919515	0.950363	1.11299	1.04387	1.09557	1.20875	0.0133349
A0A1D5PDI2	A0A1D5PDI2	tr|A0A1D5PDI2|A0A1D5PDI2_CHICK Uncharacterized protein OS=Gallus gallus OX=9031 GN=DHRS7C PE=3 SV=1	1	3	3	3	10.6	34.376	311	27.532	0.773846	0.833873	0.902833	1.12317	1.07555	1.15231	1.33477	0.00298131
A0A1D5PDT3;A0A1D5PU07;E1C784;A0A1D5PJX0;A0A3Q2TVE8;Q98SH2;A0A1D5PFN0;A0A1D5PXJ7	A0A1D5PDT3;A0A1D5PU07;E1C784;A0A1D5PJX0;A0A3Q2TVE8	tr|A0A1D5PDT3|A0A1D5PDT3_CHICK Calcium-transporting ATPase OS=Gallus gallus OX=9031 GN=ATP2B4 PE=3 SV=2;tr|A0A1D5PU07|A0A1D5PU07_CHICK Calcium-transporting ATPase OS=Gallus gallus OX=9031 GN=ATP2B4 PE=3 SV=2;tr|E1C784|E1C784_CHICK Calcium-transporting ATPa	8	6	6	6	7.1	124.08	1125	13.271	0.696714	0.815824	0.806636	1.12768	1.0585	1.18592	1.45401	0.00271708
A0A1D5PHE2	A0A1D5PHE2	tr|A0A1D5PHE2|A0A1D5PHE2_CHICK Inositol-1-monophosphatase OS=Gallus gallus OX=9031 GN=IMPA1 PE=3 SV=1	1	2	2	2	10.4	30.142	278	11.608	0.797719	0.822593	0.916083	1.14516	1.15674	1.09396	1.33886	0.00218074
A0A1D5PI23	A0A1D5PI23	tr|A0A1D5PI23|A0A1D5PI23_CHICK Dual specificity protein phosphatase OS=Gallus gallus OX=9031 GN=DUSP3 PE=3 SV=1	1	4	4	4	24.5	20.694	184	27.51	0.769715	0.844229	0.927488	1.0777	1.07687	1.12252	1.28947	0.00694013
A0A1D5PI89;A0A1D5P9R7;A0A1D5PXK5;A0A3Q2U0I3	A0A1D5PI89;A0A1D5P9R7;A0A1D5PXK5;A0A3Q2U0I3	tr|A0A1D5PI89|A0A1D5PI89_CHICK Calcium-transporting ATPase OS=Gallus gallus OX=9031 GN=ATP2B2 PE=3 SV=2;tr|A0A1D5P9R7|A0A1D5P9R7_CHICK Calcium-transporting ATPase OS=Gallus gallus OX=9031 GN=ATP2B2 PE=3 SV=2;tr|A0A1D5PXK5|A0A1D5PXK5_CHICK Calcium-transport	4	1	1	1	0.7	132.98	1212	4.0947	0.73522	0.76371	0.926537	1.21782	1.11558	1.02659	1.3853	0.0185644
A0A1D5PL53	A0A1D5PL53	tr|A0A1D5PL53|A0A1D5PL53_CHICK Glutaredoxin domain-containing protein OS=Gallus gallus OX=9031 GN=TXNRD3 PE=3 SV=1	1	4	4	4	6.1	66.4	604	8.9876	0.805582	0.957552	1.01087	1.09527	1.15654	1.08969	1.20458	0.0439033
A0A1D5PPT0;A0A1D5NTD3;Q98SH3	A0A1D5PPT0;A0A1D5NTD3;Q98SH3	tr|A0A1D5PPT0|A0A1D5PPT0_CHICK Proteasomal ubiquitin receptor ADRM1 OS=Gallus gallus OX=9031 GN=ADRM1 PE=4 SV=1;tr|A0A1D5NTD3|A0A1D5NTD3_CHICK Proteasomal ubiquitin receptor ADRM1 OS=Gallus gallus OX=9031 GN=ADRM1 PE=4 SV=1;sp|Q98SH3|ADRM1_CHICK Proteasoma	3	5	5	5	11.2	39.349	376	10.725	0.816928	0.828629	0.956909	1.01339	1.04881	1.07101	1.20394	0.0209178
A0A1D5PUM7;A0A1D5PVC1	A0A1D5PUM7	tr|A0A1D5PUM7|A0A1D5PUM7_CHICK Uncharacterized protein OS=Gallus gallus OX=9031 GN=IGFN1 PE=4 SV=2	2	88	88	15	55.5	233.15	2363	323.31	0.871562	0.923713	0.836829	1.06535	1.09132	1.18464	1.26945	0.00586881
A0A1D5PYK0;A0A1D5PFJ6;F1NWP3;A0A1L1RPG0	A0A1D5PYK0;A0A1D5PFJ6;F1NWP3;A0A1L1RPG0	tr|A0A1D5PYK0|A0A1D5PYK0_CHICK Heat shock cognate 71 kDa protein OS=Gallus gallus OX=9031 GN=HSPA8 PE=3 SV=2;tr|A0A1D5PFJ6|A0A1D5PFJ6_CHICK Heat shock cognate 71 kDa protein OS=Gallus gallus OX=9031 GN=HSPA8 PE=3 SV=2;tr|F1NWP3|F1NWP3_CHICK Heat shock cogn	4	32	19	2	54.5	69.114	624	323.31	0.704834	0.864976	0.945909	1.10194	1.00939	1.0747	1.26645	0.0423407
A0A1L1RP46;A0A1D5PE33;Q90YX6	A0A1L1RP46;A0A1D5PE33;Q90YX6	tr|A0A1L1RP46|A0A1L1RP46_CHICK Uncharacterized protein OS=Gallus gallus OX=9031 GN=RAB1A PE=4 SV=2;tr|A0A1D5PE33|A0A1D5PE33_CHICK Uncharacterized protein OS=Gallus gallus OX=9031 GN=RAB1A PE=4 SV=2;tr|Q90YX6|Q90YX6_CHICK GTP binding protein Rab1a (Fragment	3	8	8	8	45.4	22.708	205	26.245	0.593709	0.762619	0.9052	1.06075	1.03119	1.05811	1.39289	0.0307333
A0A1L1RQQ0;A0A1L1RKH8;A0A1L1RNS0;P51913;F1NZ78;Q5ZIQ4	A0A1L1RQQ0;A0A1L1RKH8;A0A1L1RNS0;P51913;F1NZ78	tr|A0A1L1RQQ0|A0A1L1RQQ0_CHICK Alpha-enolase OS=Gallus gallus OX=9031 GN=ENO1 PE=3 SV=1;tr|A0A1L1RKH8|A0A1L1RKH8_CHICK Alpha-enolase OS=Gallus gallus OX=9031 GN=ENO1 PE=3 SV=2;tr|A0A1L1RNS0|A0A1L1RNS0_CHICK Alpha-enolase OS=Gallus gallus OX=9031 GN=ENO1 PE	6	22	22	3	59.7	47.332	434	323.31	0.798035	0.879032	0.945347	1.19065	1.0881	1.13436	1.30151	0.0070893
A0A1L1RXW8;P12620	A0A1L1RXW8;P12620	tr|A0A1L1RXW8|A0A1L1RXW8_CHICK Troponin T, fast skeletal muscle isoforms OS=Gallus gallus OX=9031 GN=TNNT3 PE=4 SV=2;sp|P12620|TNNT3_CHICK Troponin T, fast skeletal muscle isoforms OS=Gallus gallus OX=9031 GN=TNNT3 PE=1 SV=3	2	21	21	2	49.1	26.141	220	197.08	0.6433	0.700824	0.880652	1.2299	1.0079	1.16103	1.52772	0.01569
A0A3Q2TS15	A0A3Q2TS15	tr|A0A3Q2TS15|A0A3Q2TS15_CHICK Uncharacterized protein OS=Gallus gallus OX=9031 PE=4 SV=1	1	354	354	353	65.4	673.18	6105	323.31	0.813632	0.918544	0.985672	1.18222	1.06075	1.09061	1.22655	0.0296176
A0A3Q2TTX7;A0A3Q2UP73;A0A3Q2TSS1;A0A3Q3AZX6;A0A3Q2UL05;R4GIU6;A0A3Q2UH98;A0A3Q2TXX4;Q804I5;A0A3Q2U728;A0A3Q2UEN5;A0A1D5PLK5;A0A1D5PDT5;B6IDG5;B6IDG6;A0A3Q2U3E1;A0A3Q2UJY7;A0A1D5P3F6;E1BZF6;A0A3Q2U6N3;A0A3Q2TYL8;Q804I4;A0A3Q2U694;A0A1D5NXZ9;A0A3Q2U146;A0A3Q2U2L9	A0A3Q2TTX7;A0A3Q2UP73;A0A3Q2TSS1	tr|A0A3Q2TTX7|A0A3Q2TTX7_CHICK SH3 domain-containing protein OS=Gallus gallus OX=9031 GN=CACNB1 PE=4 SV=1;tr|A0A3Q2UP73|A0A3Q2UP73_CHICK SH3 domain-containing protein OS=Gallus gallus OX=9031 GN=CACNB1 PE=4 SV=1;tr|A0A3Q2TSS1|A0A3Q2TSS1_CHICK SH3 domain-co	26	5	5	5	12.1	61.994	564	56.913	0.775088	0.840201	1.01727	1.20107	1.16892	1.11133	1.32241	0.021288
A0A3Q2U6J9;A0A1D5PFJ2;A0A1D5PFM3;E1C5E0;A4ZZ64;A0A1D5PL09;F1NB94;B6V3I0	A0A3Q2U6J9;A0A1D5PFJ2;A0A1D5PFM3;E1C5E0;A4ZZ64;A0A1D5PL09;F1NB94;B6V3I0	tr|A0A3Q2U6J9|A0A3Q2U6J9_CHICK Uncharacterized protein OS=Gallus gallus OX=9031 GN=CAST PE=4 SV=1;tr|A0A1D5PFJ2|A0A1D5PFJ2_CHICK Uncharacterized protein OS=Gallus gallus OX=9031 GN=CAST PE=4 SV=2;tr|A0A1D5PFM3|A0A1D5PFM3_CHICK Uncharacterized protein OS=Ga	8	4	4	4	7.7	81.202	768	2.2803	0.793476	0.757524	0.934622	1.21028	1.15785	0.963456	1.34034	0.0380927
A0A3Q2U766;F1NPA2;A0A3Q2U9E9	A0A3Q2U766;F1NPA2;A0A3Q2U9E9	tr|A0A3Q2U766|A0A3Q2U766_CHICK Uncharacterized protein OS=Gallus gallus OX=9031 GN=PSMD11 PE=4 SV=1;tr|F1NPA2|F1NPA2_CHICK PCI domain-containing protein OS=Gallus gallus OX=9031 GN=PSMD11 PE=4 SV=3;tr|A0A3Q2U9E9|A0A3Q2U9E9_CHICK PCI domain-containing prote	3	9	9	9	24.2	44.839	400	27.59	0.689053	0.773346	0.917591	1.13471	1.16164	1.13214	1.44055	0.00657777
A0A3Q2UCH4;O57476;Q90642;Q90653	A0A3Q2UCH4;O57476;Q90642	tr|A0A3Q2UCH4|A0A3Q2UCH4_CHICK Hsp90 co-chaperone Cdc37 OS=Gallus gallus OX=9031 GN=CDC37 PE=4 SV=1;sp|O57476|CDC37_CHICK Hsp90 co-chaperone Cdc37 OS=Gallus gallus OX=9031 GN=CDC37 PE=2 SV=1;tr|Q90642|Q90642_CHICK Cell division cycle control protein 37 OS=	4	6	6	6	13.5	58.882	519	11.885	0.844267	0.813318	0.911976	1.12183	1.20893	1.03182	1.30862	0.0108877
A0A3Q2UCJ9;A0A1D5PTJ2;A0A1D5PV02	A0A3Q2UCJ9;A0A1D5PTJ2;A0A1D5PV02	tr|A0A3Q2UCJ9|A0A3Q2UCJ9_CHICK Voltage-dependent L-type calcium channel subunit alpha OS=Gallus gallus OX=9031 GN=CATSPER2 PE=3 SV=1;tr|A0A1D5PTJ2|A0A1D5PTJ2_CHICK Voltage-dependent L-type calcium channel subunit alpha OS=Gallus gallus OX=9031 GN=CATSPER2	3	11	11	11	6	210.97	1862	62.848	0.89794	0.925015	0.965903	1.14524	1.07734	1.13081	1.20242	0.00275515
A0A3Q2UD90;Q90955;A0A1D5PZE1;A0A3Q2UCS1;A0A3Q2U4I4;A0A3Q2U7H6;A0A3Q2TW82;A0A3Q2UEJ5	A0A3Q2UD90;Q90955;A0A1D5PZE1;A0A3Q2UCS1;A0A3Q2U4I4;A0A3Q2U7H6;A0A3Q2TW82;A0A3Q2UEJ5	tr|A0A3Q2UD90|A0A3Q2UD90_CHICK Prostaglandin E synthase 3 OS=Gallus gallus OX=9031 GN=PTGES3 PE=4 SV=1;sp|Q90955|TEBP_CHICK Prostaglandin E synthase 3 (Fragment) OS=Gallus gallus OX=9031 GN=PTGES3 PE=1 SV=1;tr|A0A1D5PZE1|A0A1D5PZE1_CHICK Prostaglandin E sy	8	3	3	3	16.9	23.402	207	20.93	0.739376	0.862866	0.851448	1.05998	0.920846	1.08618	1.24996	0.034171
A0A3Q2UDT6;A0A1D5PKA9;Q5F3J3	A0A3Q2UDT6;A0A1D5PKA9	tr|A0A3Q2UDT6|A0A3Q2UDT6_CHICK Uncharacterized protein OS=Gallus gallus OX=9031 GN=NPEPPS PE=4 SV=1;tr|A0A1D5PKA9|A0A1D5PKA9_CHICK Uncharacterized protein OS=Gallus gallus OX=9031 GN=NPEPPS PE=4 SV=2	3	19	19	19	18.8	124.22	1113	134.67	0.787037	0.88692	0.922383	1.0814	0.977922	1.07107	1.20569	0.0270171
A0A3Q2UEL1;F1NF80	A0A3Q2UEL1;F1NF80	tr|A0A3Q2UEL1|A0A3Q2UEL1_CHICK Uncharacterized protein OS=Gallus gallus OX=9031 GN=PPCS PE=4 SV=1;tr|F1NF80|F1NF80_CHICK Uncharacterized protein OS=Gallus gallus OX=9031 GN=PPCS PE=4 SV=3	2	5	5	5	20.3	43.713	414	73.97	0.871785	0.978382	0.876388	1.09867	1.16139	1.29955	1.30553	0.0156403
A0A3Q2UHZ2	A0A3Q2UHZ2	tr|A0A3Q2UHZ2|A0A3Q2UHZ2_CHICK Uncharacterized protein OS=Gallus gallus OX=9031 PE=4 SV=1	1	29	29	29	61.1	48.519	419	284.27	0.801234	0.820067	1.02687	1.16454	1.1409	1.07227	1.27549	0.0347776
A0A3Q2UJM6;F1N872	A0A3Q2UJM6;F1N872	tr|A0A3Q2UJM6|A0A3Q2UJM6_CHICK Malectin domain-containing protein OS=Gallus gallus OX=9031 GN=MLEC PE=4 SV=1;tr|F1N872|F1N872_CHICK Malectin domain-containing protein OS=Gallus gallus OX=9031 GN=MLEC PE=4 SV=3	2	2	2	2	12	27.708	251	11.055	0.931539	0.801046	0.873548	0.953134	1.14408	1.0812	1.21959	0.0479082
A0A3Q2UMD3;A0A1D5NZU2;A0A3Q2UFJ3;A0A1D5PNB0;A0A1D5NZG7;A0A3Q2UPU8;A0A3Q2U2C3	A0A3Q2UMD3;A0A1D5NZU2;A0A3Q2UFJ3;A0A1D5PNB0;A0A1D5NZG7;A0A3Q2UPU8;A0A3Q2U2C3	tr|A0A3Q2UMD3|A0A3Q2UMD3_CHICK Calcium/calmodulin-dependent protein kinase type II delta chain OS=Gallus gallus OX=9031 GN=CAMK2D PE=4 SV=1;tr|A0A1D5NZU2|A0A1D5NZU2_CHICK Calcium/calmodulin-dependent protein kinase type II delta chain OS=Gallus gallus OX=9	7	11	11	2	22.7	57.869	512	59.294	0.695079	0.784059	0.997057	1.27311	1.12697	1.05601	1.39573	0.0412256
A0A3Q3A4C6;A0A1D5NY50;Q9DEG5	A0A3Q3A4C6;A0A1D5NY50	tr|A0A3Q3A4C6|A0A3Q3A4C6_CHICK Uncharacterized protein OS=Gallus gallus OX=9031 PE=4 SV=1;tr|A0A1D5NY50|A0A1D5NY50_CHICK Uncharacterized protein OS=Gallus gallus OX=9031 PE=4 SV=2	3	142	142	13	52.5	302.27	2613	323.31	0.82475	0.896182	0.988832	1.16781	1.07481	1.07138	1.22298	0.0242101
A0A3Q3A846;A0A3Q2UCS5;A0A3Q2TWS0;E1BRQ5;A0A3Q3AFS3;A0A1D5P8Q5	A0A3Q3A846;A0A3Q2UCS5;A0A3Q2TWS0;E1BRQ5;A0A3Q3AFS3;A0A1D5P8Q5	tr|A0A3Q3A846|A0A3Q3A846_CHICK NFACT-R_1 domain-containing protein OS=Gallus gallus OX=9031 GN=CCDC25 PE=4 SV=1;tr|A0A3Q2UCS5|A0A3Q2UCS5_CHICK NFACT-R_1 domain-containing protein OS=Gallus gallus OX=9031 GN=CCDC25 PE=4 SV=1;tr|A0A3Q2TWS0|A0A3Q2TWS0_CHICK N	6	2	2	2	11.1	21.855	189	2.3909	0.893076	0.937568	0.929222	1.11715	1.14626	1.15515	1.23867	0.00025008
A0A3Q3ADU5;F1NIB4;Q90626;Q90602;A0A1D5NX25	A0A3Q3ADU5;F1NIB4;Q90626;Q90602;A0A1D5NX25	tr|A0A3Q3ADU5|A0A3Q3ADU5_CHICK Uncharacterized protein OS=Gallus gallus OX=9031 GN=HNRNPAB PE=4 SV=1;tr|F1NIB4|F1NIB4_CHICK Uncharacterized protein OS=Gallus gallus OX=9031 GN=HNRNPAB PE=4 SV=5;tr|Q90626|Q90626_CHICK Ribonucleoprotein OS=Gallus gallus OX=9	5	4	4	4	8.6	45.65	428	20.895	0.828765	0.744009	0.98522	1.09357	1.11673	1.04273	1.27171	0.0350896
A0A3Q3AHU9	A0A3Q3AHU9	tr|A0A3Q3AHU9|A0A3Q3AHU9_CHICK Uncharacterized protein OS=Gallus gallus OX=9031 GN=LOC424401 PE=4 SV=1	1	8	8	8	64.3	13.06	115	50.578	0.810698	0.82562	0.908731	1.16265	1.07474	1.18407	1.34436	0.00296701
A0A3Q3ATJ1;A0A3Q2TUF8;E1BST5;A0A3Q2U1Y1;A0A3Q2TVT0;A0A3Q2U938;A0A3Q3AZE6	A0A3Q3ATJ1;A0A3Q2TUF8;E1BST5;A0A3Q2U1Y1;A0A3Q2TVT0;A0A3Q2U938;A0A3Q3AZE6	tr|A0A3Q3ATJ1|A0A3Q3ATJ1_CHICK VWFA domain-containing protein OS=Gallus gallus OX=9031 GN=CACNA2D1 PE=4 SV=1;tr|A0A3Q2TUF8|A0A3Q2TUF8_CHICK VWFA domain-containing protein OS=Gallus gallus OX=9031 GN=CACNA2D1 PE=4 SV=1;tr|E1BST5|E1BST5_CHICK VWFA domain-con	7	19	19	19	19.1	131.08	1155	107.5	0.902199	0.882033	0.98082	1.15521	1.05288	1.11412	1.2015	0.0118092
A0A3Q3AZP2;Q5ZJU8;F1NZ26	A0A3Q3AZP2	tr|A0A3Q3AZP2|A0A3Q3AZP2_CHICK Uncharacterized protein OS=Gallus gallus OX=9031 GN=TNFAIP8L3 PE=4 SV=1	3	3	3	3	15.2	23.484	204	3.8817	0.767121	0.750133	0.749406	1.04274	1.23118	0.977312	1.43437	0.0126429
A1IMF0	A1IMF0	tr|A1IMF0|A1IMF0_CHICK Ubiquitin carboxyl-terminal hydrolase OS=Gallus gallus OX=9031 GN=UCH-L1 PE=2 SV=1	1	2	2	2	14.7	25.11	224	39.087	0.720054	0.765858	0.796791	0.930395	1.13406	1.21618	1.43717	0.0193091
A6BM71;Q98918;A6BLM5;Q08476;A6BM73;A6BLM6;A0A3Q2UG28;Q788U5;REV__Q5ZI37;REV__F1NPQ0	A6BM71	tr|A6BM71|A6BM71_CHICK Connectin (Fragment) OS=Gallus gallus OX=9031 GN=TTN PE=2 SV=1	10	414	414	232	52.2	904.79	8074	323.31	0.805708	0.887962	0.983049	1.19426	1.06276	1.07916	1.24637	0.028893
E1BTT7	E1BTT7	tr|E1BTT7|E1BTT7_CHICK Gal_mutarotas_2 domain-containing protein OS=Gallus gallus OX=9031 GN=GANC PE=3 SV=1	1	11	11	11	13	104.83	914	30.724	0.939015	0.848206	0.912822	1.02074	1.1552	1.07932	1.20563	0.0174297
E1BVU4	E1BVU4	tr|E1BVU4|E1BVU4_CHICK SH3 domain-binding glutamic acid-rich-like protein OS=Gallus gallus OX=9031 PE=3 SV=4	1	5	5	5	42	12.557	112	63.328	0.68719	0.780866	0.846439	1.24741	0.949762	1.23953	1.48486	0.0259469
E1C0Q5	E1C0Q5	tr|E1C0Q5|E1C0Q5_CHICK Uncharacterized protein OS=Gallus gallus OX=9031 GN=ACAT1 PE=3 SV=2	1	8	8	8	24.7	44.09	421	135.93	0.772142	0.872473	0.933076	1.12622	1.11428	1.01199	1.26178	0.0192155
E1C6A3	E1C6A3	tr|E1C6A3|E1C6A3_CHICK WH2 domain-containing protein OS=Gallus gallus OX=9031 GN=LMOD3 PE=4 SV=4	1	2	2	2	3.6	59.636	524	3.3655	0.755099	0.677952	0.841321	1.1221	1.17751	1.16325	1.52256	0.00137587
E1C6T8;A0A1L1RQW9	E1C6T8;A0A1L1RQW9	tr|E1C6T8|E1C6T8_CHICK Eukaryotic translation initiation factor 3 subunit I OS=Gallus gallus OX=9031 GN=EIF3I PE=3 SV=1;tr|A0A1L1RQW9|A0A1L1RQW9_CHICK WD_REPEATS_REGION domain-containing protein OS=Gallus gallus OX=9031 GN=EIF3I PE=4 SV=2	2	3	3	3	10.5	36.489	325	8.9131	0.817021	0.845895	0.881964	1.11065	1.02325	1.15824	1.29363	0.00470759
E1C7I7	E1C7I7	tr|E1C7I7|E1C7I7_CHICK Uncharacterized protein OS=Gallus gallus OX=9031 GN=IGFN1 PE=4 SV=4	1	76	3	3	56.8	190.75	1981	4.9751	0.796879	0.751318	0.859734	1.06603	1.38814	1.15296	1.49802	0.0168273
E1C846;A0A1D5PTL0	E1C846;A0A1D5PTL0	tr|E1C846|E1C846_CHICK Ig-like domain-containing protein OS=Gallus gallus OX=9031 GN=CILP PE=4 SV=4;tr|A0A1D5PTL0|A0A1D5PTL0_CHICK Ig-like domain-containing protein OS=Gallus gallus OX=9031 GN=CILP PE=4 SV=2	2	2	2	2	2	120.74	1076	6.9688		0.84527	0.791567		1.17442	1.11515	1.39877	0.0146853
F1N903;A0A3Q3ACV0	F1N903;A0A3Q3ACV0	tr|F1N903|F1N903_CHICK PCI domain-containing protein OS=Gallus gallus OX=9031 GN=PSMD6 PE=4 SV=2;tr|A0A3Q3ACV0|A0A3Q3ACV0_CHICK PCI domain-containing protein OS=Gallus gallus OX=9031 GN=PSMD6 PE=4 SV=1	2	4	4	4	8.7	45.577	389	5.624	0.787096	0.698821	0.930107	1.09802	0.991311	1.11678	1.32702	0.0277604
F1N9Z6;A0A1D5PSF9;Q90724	F1N9Z6;A0A1D5PSF9;Q90724	tr|F1N9Z6|F1N9Z6_CHICK Uncharacterized protein OS=Gallus gallus OX=9031 GN=MYOM1 PE=4 SV=4;tr|A0A1D5PSF9|A0A1D5PSF9_CHICK Uncharacterized protein OS=Gallus gallus OX=9031 GN=MYOM1 PE=4 SV=1;tr|Q90724|Q90724_CHICK Myomesin OS=Gallus gallus OX=9031 PE=2 SV=1	3	77	77	77	53.9	177.33	1587	323.31	0.807408	0.872129	0.918288	1.16291	0.993144	1.10391	1.25488	0.0203812
F1NBV0;Q5ZJF4	F1NBV0;Q5ZJF4	tr|F1NBV0|F1NBV0_CHICK Peroxiredoxin-6 OS=Gallus gallus OX=9031 GN=PRDX6 PE=4 SV=1;sp|Q5ZJF4|PRDX6_CHICK Peroxiredoxin-6 OS=Gallus gallus OX=9031 GN=PRDX6 PE=2 SV=3	2	14	14	14	59.4	25.076	224	166.75	0.799545	0.820658	0.986645	1.12104	1.07243	1.05764	1.24714	0.0259708
F1NE32	F1NE32	tr|F1NE32|F1NE32_CHICK MSP domain-containing protein OS=Gallus gallus OX=9031 GN=MOSPD1 PE=4 SV=2	1	3	3	3	12	24.424	216	4.975	0.804227	0.911516	0.937673	1.21274	1.15955	1.07734	1.30007	0.00945653
F1NG97	F1NG97	tr|F1NG97|F1NG97_CHICK AMP deaminase OS=Gallus gallus OX=9031 GN=AMPD3 PE=3 SV=2	1	4	2	2	4.2	88.93	765	1.8098	0.702224	0.911422	0.971706	1.16374	1.12168	1.09308	1.30678	0.0348438
F1NHA9;Q9PU47;A0A3Q2UH56	F1NHA9;Q9PU47;A0A3Q2UH56	tr|F1NHA9|F1NHA9_CHICK PDZ and LIM domain protein 3 OS=Gallus gallus OX=9031 GN=PDLIM3 PE=4 SV=2;sp|Q9PU47|PDLI3_CHICK PDZ and LIM domain protein 3 OS=Gallus gallus OX=9031 GN=PDLIM3 PE=1 SV=1;tr|A0A3Q2UH56|A0A3Q2UH56_CHICK PDZ and LIM domain protein 3 OS=	3	14	14	14	53.4	39.565	363	288.88	0.737538	0.862648	0.901826	1.15243	0.957451	1.10877	1.28643	0.0362802
F1NIJ6;Q5ZMU3;A0A1L1RQ91;A0A1L1RPE8;A0A1D5PRS4	F1NIJ6;Q5ZMU3;A0A1L1RQ91;A0A1L1RPE8;A0A1D5PRS4	tr|F1NIJ6|F1NIJ6_CHICK Glucose-6-phosphate isomerase OS=Gallus gallus OX=9031 GN=GPI PE=3 SV=2;tr|Q5ZMU3|Q5ZMU3_CHICK Glucose-6-phosphate isomerase OS=Gallus gallus OX=9031 GN=RCJMB04_1c14 PE=2 SV=1;tr|A0A1L1RQ91|A0A1L1RQ91_CHICK Glucose-6-phosphate isomer	5	24	24	24	42.5	59.226	525	323.31	0.743235	0.812352	0.949667	1.18433	1.07583	1.13233	1.35415	0.0123359
F1NNW0;Q02173;A0A1D5PKV3	F1NNW0;Q02173;A0A1D5PKV3	tr|F1NNW0|F1NNW0_CHICK Uncharacterized protein OS=Gallus gallus OX=9031 GN=MYOM2 PE=4 SV=1;sp|Q02173|MPSF_CHICK M-protein, striated muscle OS=Gallus gallus OX=9031 PE=2 SV=1;tr|A0A1D5PKV3|A0A1D5PKV3_CHICK Uncharacterized protein OS=Gallus gallus OX=9031 GN	3	80	80	80	59.2	163.41	1450	323.31	0.832759	0.938648	0.912157	1.15509	0.998511	1.12921	1.2233	0.026155
F1NPJ4;Q9YHT1	F1NPJ4;Q9YHT1	tr|F1NPJ4|F1NPJ4_CHICK Succinate dehydrogenase [ubiquinone] flavoprotein subunit, mitochondrial OS=Gallus gallus OX=9031 GN=SDHA PE=3 SV=2;sp|Q9YHT1|SDHA_CHICK Succinate dehydrogenase [ubiquinone] flavoprotein subunit, mitochondrial OS=Gallus gallus OX=903	2	12	12	12	22.1	72.963	665	128.29	0.811299	0.785895	0.916059	1.0301	1.10467	0.925506	1.21765	0.049569
F1NSC1	F1NSC1	tr|F1NSC1|F1NSC1_CHICK Uncharacterized protein OS=Gallus gallus OX=9031 GN=ATP5F1 PE=4 SV=3	1	8	8	8	15.5	51.109	465	37.743	0.684608	0.731372	0.902436	1.07764	1.06277	1.04379	1.37344	0.0125255
F1NSZ4	F1NSZ4	tr|F1NSZ4|F1NSZ4_CHICK CYTOSOL_AP domain-containing protein OS=Gallus gallus OX=9031 GN=NPEPL1 PE=4 SV=2	1	8	8	8	18.7	56.089	523	156.91	0.832633	0.920802	0.881708	1.16868	0.976412	1.17461	1.25978	0.030976
F1NU17;P51903	F1NU17;P51903	tr|F1NU17|F1NU17_CHICK Phosphoglycerate kinase OS=Gallus gallus OX=9031 GN=PGK1 PE=3 SV=1;sp|P51903|PGK_CHICK Phosphoglycerate kinase OS=Gallus gallus OX=9031 GN=PGK PE=2 SV=2	2	30	30	30	70	44.666	417	323.31	0.836196	0.918141	0.917919	1.1193	1.01941	1.13624	1.22553	0.0115754
F1NVD4;Q5ZJL5;A0A1D5PL45	F1NVD4	tr|F1NVD4|F1NVD4_CHICK Adenylosuccinate synthetase isozyme 1 OS=Gallus gallus OX=9031 GN=ADSSL1 PE=3 SV=4	3	17	17	17	38.8	50.097	456	195.94	0.84894	0.932544	0.834987	1.3341	1.03677	1.47444	1.46966	0.0365826
F1NYA9;Q5ZHY1;Q9YGQ1	F1NYA9;Q5ZHY1;Q9YGQ1	tr|F1NYA9|F1NYA9_CHICK Uncharacterized protein OS=Gallus gallus OX=9031 GN=EEF1B2 PE=3 SV=1;tr|Q5ZHY1|Q5ZHY1_CHICK Uncharacterized protein OS=Gallus gallus OX=9031 GN=RCJMB04_32c11 PE=2 SV=1;sp|Q9YGQ1|EF1B_CHICK Elongation factor 1-beta OS=Gallus gallus OX	3	4	4	4	19.2	24.718	224	4.5992	0.7354	0.783122	0.871759	1.07582	1.07935	1.0062	1.32259	0.00523732
F1NYI3	F1NYI3	tr|F1NYI3|F1NYI3_CHICK tRNA-splicing ligase RtcB homolog OS=Gallus gallus OX=9031 GN=RTCB PE=3 SV=2	1	10	10	10	20.8	55.242	505	54.581	0.802989	0.890151	0.781106	1.01842	1.00062	1.15955	1.28467	0.0176423
F1NZY9;A0A1L1RLZ8;A0A1L1RZM9	F1NZY9;A0A1L1RLZ8;A0A1L1RZM9	tr|F1NZY9|F1NZY9_CHICK NADH-cytochrome b5 reductase OS=Gallus gallus OX=9031 GN=CYB5R3 PE=3 SV=3;tr|A0A1L1RLZ8|A0A1L1RLZ8_CHICK NADH-cytochrome b5 reductase OS=Gallus gallus OX=9031 GN=CYB5R3 PE=3 SV=2;tr|A0A1L1RZM9|A0A1L1RZM9_CHICK NADH-cytochrome b5 redu	3	2	2	2	7.3	34.088	301	6.7872	0.582501	0.586096	0.903901	1.05588	1.09306	0.962045	1.50108	0.0379787
F1P0Z7	F1P0Z7	tr|F1P0Z7|F1P0Z7_CHICK Uncharacterized protein OS=Gallus gallus OX=9031 GN=ARL8B PE=3 SV=2	1	2	2	2	12.4	21.509	186	2.6428	0.883078	0.810348	0.978463	1.07685	1.11663	1.03796	1.20942	0.0255288
F1P2E9	F1P2E9	tr|F1P2E9|F1P2E9_CHICK Uncharacterized protein OS=Gallus gallus OX=9031 GN=MYPN PE=4 SV=5	1	19	19	14	23.4	109.52	991	97.112	0.791855	0.842679	0.985758	1.07282	1.11316	1.02019	1.22359	0.0379464
F1P3P3;Q5ZMT1	F1P3P3;Q5ZMT1	tr|F1P3P3|F1P3P3_CHICK Uncharacterized protein OS=Gallus gallus OX=9031 GN=ARHGDIA PE=4 SV=1;tr|Q5ZMT1|Q5ZMT1_CHICK Uncharacterized protein OS=Gallus gallus OX=9031 GN=RCJMB04_1d23 PE=2 SV=1	2	5	5	5	34.8	23.262	204	82.02	0.729791	0.737464	0.925737	1.02293	0.989925	1.00553	1.26134	0.0323409
F1P593;Q00649;Q90784;E1C1Q2	F1P593;Q00649	tr|F1P593|F1P593_CHICK Heat shock protein beta-1 OS=Gallus gallus OX=9031 GN=HSPB1 PE=3 SV=2;sp|Q00649|HSPB1_CHICK Heat shock protein beta-1 OS=Gallus gallus OX=9031 GN=HSPB1 PE=2 SV=1	4	13	13	13	66.5	21.826	194	323.31	0.633126	0.707034	0.818311	0.96672	0.930481	0.990345	1.33777	0.0126821
F1P5R7;A0A1L1RPT1	F1P5R7;A0A1L1RPT1	tr|F1P5R7|F1P5R7_CHICK Uncharacterized protein OS=Gallus gallus OX=9031 GN=SMYD1 PE=4 SV=4;tr|A0A1L1RPT1|A0A1L1RPT1_CHICK Uncharacterized protein OS=Gallus gallus OX=9031 GN=SMYD1 PE=4 SV=1	2	13	13	3	33.9	54.812	478	148.82	0.782929	0.817596	0.830463	1.09553	1.05766	1.0867	1.33274	0.000121656
G4WW42	G4WW42	tr|G4WW42|G4WW42_CHICK Beta-actin (Fragment) OS=Gallus gallus OX=9031 PE=2 SV=1	1	4	1	1	39.3	16.013	145	1.9705	0.593499	0.495267	0.986064	1.31112	1.19823	1.21696	1.79596	0.0232539
H9L3K0;H9L074	H9L3K0;H9L074	tr|H9L3K0|H9L3K0_CHICK Tropomyosin 3 alpha isoform OS=Gallus gallus OX=9031 GN=TPM3 PE=2 SV=3;tr|H9L074|H9L074_CHICK Uncharacterized protein OS=Gallus gallus OX=9031 GN=TPM3 PE=3 SV=3	2	31	9	4	66.9	32.818	284	86.129	0.669271	0.790431	0.797962	1.22991	1.08445	1.11176	1.51755	0.00310372
P00340;E1BTT8;A0A1D5NZ01	P00340;E1BTT8;A0A1D5NZ01	sp|P00340|LDHA_CHICK L-lactate dehydrogenase A chain OS=Gallus gallus OX=9031 GN=LDHA PE=1 SV=3;tr|E1BTT8|E1BTT8_CHICK L-lactate dehydrogenase OS=Gallus gallus OX=9031 GN=LDHA PE=3 SV=2;tr|A0A1D5NZ01|A0A1D5NZ01_CHICK L-lactate dehydrogenase OS=Gallus gallu	3	21	21	21	56.9	36.514	332	323.31	0.74638	0.780203	0.860828	1.19397	0.963183	1.20084	1.40654	0.0191178
P00565;A0A3Q2U6M6;A0A3Q2U807	P00565	sp|P00565|KCRM_CHICK Creatine kinase M-type OS=Gallus gallus OX=9031 GN=CKM PE=2 SV=1	3	30	30	25	68.8	43.328	381	323.31	0.767449	0.911437	0.991776	1.2291	1.05382	1.13913	1.28135	0.039067
P02604	P02604	sp|P02604|MLE1_CHICK Myosin light chain 1, skeletal muscle isoform OS=Gallus gallus OX=9031 PE=1 SV=3	1	21	21	7	85.9	20.899	192	323.31	0.783959	0.865472	0.943833	1.20863	1.06432	1.15759	1.32287	0.0111565
P02609;A0A3Q3A970	P02609	sp|P02609|MLRS_CHICK Myosin regulatory light chain 2, skeletal muscle isoform OS=Gallus gallus OX=9031 GN=MYLPF PE=1 SV=2	2	15	15	15	79.2	18.839	168	323.31	0.752068	0.804114	0.966717	1.19173	1.08739	1.12417	1.34896	0.0148014
P04268;F1NM23;A0A1D5P342;A0A1D5NVL7;Q91968;A0A1D5PSX3;A0A1L1RVF2	P04268;F1NM23;A0A1D5P342;A0A1D5NVL7;Q91968;A0A1D5PSX3;A0A1L1RVF2	sp|P04268|TPM1_CHICK Tropomyosin alpha-1 chain OS=Gallus gallus OX=9031 GN=TPM1 PE=1 SV=2;tr|F1NM23|F1NM23_CHICK Tropomyosin alpha-1 chain OS=Gallus gallus OX=9031 GN=TPM1 PE=3 SV=3;tr|A0A1D5P342|A0A1D5P342_CHICK Tropomyosin alpha-1 chain OS=Gallus gallus	7	42	42	0	79.2	32.765	284	323.31	0.727077	0.790057	0.983646	1.18903	1.16867	1.11928	1.39036	0.015208
P07322	P07322	sp|P07322|ENOB_CHICK Beta-enolase OS=Gallus gallus OX=9031 GN=ENO3 PE=1 SV=3	1	18	15	13	43.5	47.196	434	323.31	0.827966	0.889953	0.958979	1.12797	1.12283	1.07817	1.24359	0.00608685
P13538	P13538	sp|P13538|MYSS_CHICK Myosin heavy chain, skeletal muscle, adult OS=Gallus gallus OX=9031 PE=1 SV=4	1	190	190	0	69.6	223.14	1939	323.31	0.775048	0.87615	0.955612	1.18868	1.10569	1.11164	1.30658	0.0105033
P13585	P13585	sp|P13585|AT2A1_CHICK Sarcoplasmic/endoplasmic reticulum calcium ATPase 1 OS=Gallus gallus OX=9031 GN=ATP2A1 PE=2 SV=2	1	44	44	27	45.9	109.02	994	323.31	0.86928	0.935455	0.96648	1.23221	1.05163	1.13526	1.23379	0.0222083
P16419;A0A3Q2TY75	P16419	sp|P16419|MYPC2_CHICK Myosin-binding protein C, fast-type OS=Gallus gallus OX=9031 GN=MYBPC2 PE=1 SV=3	2	73	73	69	65.6	126.94	1132	323.31	0.845414	0.933836	0.958814	1.19067	1.10065	1.11348	1.24351	0.00747726
P19121	P19121	sp|P19121|ALBU_CHICK Serum albumin OS=Gallus gallus OX=9031 GN=ALB PE=1 SV=2	1	38	2	2	63.7	69.918	615	4.7249	0.552782	0.652524	0.912926	1.11987	0.932904	1.09705	1.48701	0.0484032
P19966;E1C7W7	P19966	sp|P19966|TAGL_CHICK Transgelin OS=Gallus gallus OX=9031 GN=TAGLN PE=1 SV=3	2	7	7	6	35	22.314	200	14.668	0.899559	0.96847	0.87414	1.28688	1.11738	1.02343	1.24999	0.0496111
P28497;A0M8U0	P28497;A0M8U0	sp|P28497|CAZA2_CHICK F-actin-capping protein subunit alpha-2 OS=Gallus gallus OX=9031 GN=CAPZA2 PE=1 SV=1;tr|A0M8U0|A0M8U0_CHICK F-actin-capping protein subunit alpha OS=Gallus gallus OX=9031 GN=CAPZA2 PE=3 SV=1	2	11	11	11	59.1	32.844	286	170.59	0.780697	0.874761	0.934525	1.18005	1.069	1.14062	1.30876	0.00853505
P61355;A0A452J7V8;A0A1L1RRZ8	P61355;A0A452J7V8	sp|P61355|RL27_CHICK 60S ribosomal protein L27 OS=Gallus gallus OX=9031 GN=RPL27 PE=2 SV=2;tr|A0A452J7V8|A0A452J7V8_CHICK 60S ribosomal protein L27 OS=Gallus gallus OX=9031 GN=RPL27 PE=3 SV=1	3	3	3	3	28.7	15.798	136	4.697	0.715885	0.631689	0.947169	1.17917	1.07648	1.15279	1.48532	0.0200895
P79792	P79792	tr|P79792|P79792_CHICK Slow myosin heavy chain 1 (Fragment) OS=Gallus gallus OX=9031 GN=SM1 PE=2 SV=1	1	19	1	1	53.8	31.53	273	-2	0.878217	0.730332	0.948992	1.2106	1.10224	1.11988	1.34219	0.015915
P87362	P87362	sp|P87362|BLMH_CHICK Bleomycin hydrolase OS=Gallus gallus OX=9031 GN=BLMH PE=1 SV=1	1	5	5	4	11	52.69	455	18.332	0.67686	0.752974	0.982213	1.19442	1.23641	1.1135	1.46943	0.0186537
Q07784	Q07784	tr|Q07784|Q07784_CHICK Titin (Fragment) OS=Gallus gallus OX=9031 PE=2 SV=1	1	54	54	54	65.7	91.387	817	323.31	0.794231	0.932586	0.974439	1.19633	1.03203	1.10452	1.23383	0.0435583
Q5F3M8;F1N9Z7;Q5F365;Q5ZHL9	Q5F3M8;F1N9Z7	tr|Q5F3M8|Q5F3M8_CHICK Succinyl-CoA:3-ketoacid-coenzyme A transferase OS=Gallus gallus OX=9031 GN=RCJMB04_12o19 PE=2 SV=1;tr|F1N9Z7|F1N9Z7_CHICK Succinyl-CoA:3-ketoacid-coenzyme A transferase OS=Gallus gallus OX=9031 GN=OXCT1 PE=3 SV=2	4	10	10	10	24.6	56.185	517	77.335	0.825233	0.734878	0.963147	1.12659	1.11766	1.03673	1.3003	0.0250044
Q5F3W6;F1NMY1;A0A3Q2U4C6	Q5F3W6;F1NMY1;A0A3Q2U4C6	sp|Q5F3W6|1433G_CHICK 14-3-3 protein gamma OS=Gallus gallus OX=9031 GN=YWHAG PE=1 SV=1;tr|F1NMY1|F1NMY1_CHICK 14-3-3 protein gamma OS=Gallus gallus OX=9031 GN=YWHAG PE=3 SV=3;tr|A0A3Q2U4C6|A0A3Q2U4C6_CHICK 14-3-3 protein gamma OS=Gallus gallus OX=9031 GN=Y	3	15	15	8	60.7	28.23	247	254.89	0.736009	0.7882	0.993192	1.15785	1.12431	1.04047	1.31986	0.0353692
Q5F3Z3;A0A1L1RZV0	Q5F3Z3;A0A1L1RZV0	sp|Q5F3Z3|UB2V2_CHICK Ubiquitin-conjugating enzyme E2 variant 2 OS=Gallus gallus OX=9031 GN=UBE2V2 PE=2 SV=1;tr|A0A1L1RZV0|A0A1L1RZV0_CHICK Ubiquitin-conjugating enzyme E2 variant 2 OS=Gallus gallus OX=9031 GN=UBE2V2 PE=4 SV=2	2	7	7	4	50	16.305	144	29.224	0.795699	0.86929	0.954382	1.08305	1.12905	1.0638	1.25064	0.0117146
Q5ZHP2	Q5ZHP2	tr|Q5ZHP2|Q5ZHP2_CHICK Macro domain-containing protein OS=Gallus gallus OX=9031 GN=OARD1 PE=2 SV=1	1	5	5	5	31.7	20.906	189	33.855	0.722771	0.728656	0.834391	1.33134	0.890913	1.24941	1.51879	0.0476773
Q5ZJ38;A0A3Q2TU27	Q5ZJ38;A0A3Q2TU27	tr|Q5ZJ38|Q5ZJ38_CHICK RanBD1 domain-containing protein OS=Gallus gallus OX=9031 GN=RANBP1 PE=2 SV=1;tr|A0A3Q2TU27|A0A3Q2TU27_CHICK RanBD1 domain-containing protein OS=Gallus gallus OX=9031 GN=RANBP1 PE=4 SV=1	2	2	2	2	10.6	24.171	208	8.703	0.768555	0.749195		0.988396	1.04552		1.34009	0.0133826
Q5ZK18;F1P156	Q5ZK18;F1P156	tr|Q5ZK18|Q5ZK18_CHICK 3HCDH_N domain-containing protein OS=Gallus gallus OX=9031 GN=RCJMB04_13l16 PE=2 SV=1;tr|F1P156|F1P156_CHICK Uncharacterized protein OS=Gallus gallus OX=9031 GN=CRYL1 PE=4 SV=2	2	7	7	7	31.7	31.26	281	44.931	0.782545	0.830794	0.974868	1.21248	1.05588	1.0645	1.28771	0.032099
Q5ZLF7	Q5ZLF7	tr|Q5ZLF7|Q5ZLF7_CHICK Importin subunit alpha OS=Gallus gallus OX=9031 GN=KPNA4 PE=2 SV=1	1	3	3	2	7.3	57.854	521	37.955	0.848662	0.861482	0.922858	1.08154	1.05778	1.15136	1.24978	0.00376607
Q5ZMC0;A0A3Q3AS95	Q5ZMC0	sp|Q5ZMC0|EDF1_CHICK Endothelial differentiation-related factor 1 homolog OS=Gallus gallus OX=9031 GN=EDF1 PE=2 SV=1	2	11	11	11	59.5	16.363	148	56.357	0.833292	0.775584	0.986911	1.15563	1.07416	1.07742	1.27407	0.0257195
Q5ZME4;E1BSN7;Q7ZZK3	Q5ZME4;E1BSN7	tr|Q5ZME4|Q5ZME4_CHICK Alpha-1,4 glucan phosphorylase OS=Gallus gallus OX=9031 GN=RCJMB04_2f16 PE=2 SV=1;tr|E1BSN7|E1BSN7_CHICK Alpha-1,4 glucan phosphorylase OS=Gallus gallus OX=9031 GN=PYGB PE=3 SV=2	3	17	17	10	21	96.729	843	133.59	0.865149	0.889702	0.964907	1.18867	1.09996	1.16958	1.27151	0.00364992
Q5ZMF5;A0A1D5PF08	Q5ZMF5;A0A1D5PF08	tr|Q5ZMF5|Q5ZMF5_CHICK Uncharacterized protein OS=Gallus gallus OX=9031 GN=RCJMB04_2d15 PE=2 SV=1;tr|A0A1D5PF08|A0A1D5PF08_CHICK Uncharacterized protein OS=Gallus gallus OX=9031 GN=CANX PE=3 SV=1	2	6	6	6	12.5	68.108	599	23.286	0.632811	0.676885	0.86403	1.11466	1.1049	1.03777	1.4985	0.00850208
Q5ZMQ7	Q5ZMQ7	tr|Q5ZMQ7|Q5ZMQ7_CHICK Uncharacterized protein OS=Gallus gallus OX=9031 GN=SH3KBP1 PE=1 SV=1	1	3	3	3	5.3	81.517	739	29.927	0.854399	0.917412	0.952421	1.12772	1.15705	1.07884	1.2347	0.00435071
Q6DRR5;F1NUQ3;Q6VYR1;Q800V4;P80565;A0A1D5PJZ5	Q6DRR5;F1NUQ3	tr|Q6DRR5|Q6DRR5_CHICK Fatty acid-binding protein OS=Gallus gallus OX=9031 GN=FABP PE=3 SV=1;tr|F1NUQ3|F1NUQ3_CHICK Heart fatty acid binding protein OS=Gallus gallus OX=9031 GN=FABP3 PE=2 SV=2	6	8	8	6	55.6	14.816	133	118.79	0.637938	0.777027	0.793586	0.96975	0.887814	0.876074	1.23775	0.0382149
Q6EE33;Q5ZK81;F1NI89	Q6EE33;Q5ZK81;F1NI89	tr|Q6EE33|Q6EE33_CHICK S-(hydroxymethyl)glutathione dehydrogenase (Fragment) OS=Gallus gallus OX=9031 PE=2 SV=1;tr|Q5ZK81|Q5ZK81_CHICK S-(hydroxymethyl)glutathione dehydrogenase OS=Gallus gallus OX=9031 GN=RCJMB04_12i19 PE=2 SV=1;tr|F1NI89|F1NI89_CHICK S-(	3	3	3	3	8.9	39.124	371	6.8061	0.761993	0.909969	0.885073	1.04813	0.963376	1.07338	1.20643	0.0358466
Q7LZE8	Q7LZE8	tr|Q7LZE8|Q7LZE8_CHICK Fructose-bisphosphate aldolase (Fragment) OS=Gallus gallus OX=9031 PE=1 SV=1	1	2	2	2	100	2.3436	20	19.763	0.796741	0.862242	1.01839	1.19011	1.15592	1.09727	1.28607	0.0229616
Q7SX63;B3VHV2;B6EAX2;P08106;A0A346RQZ3;D6PVB7;A0A4P8GB30;A0A4P8G8N8;M4MBM4;M4MA50;A0A2I4KE16;Q7ZSX8;C0L3J6;A0A4P8GA18;A0A0A0V762;M4MA71;M4MDA2;C3VQ56	Q7SX63;B3VHV2;B6EAX2;P08106;A0A346RQZ3;D6PVB7	tr|Q7SX63|Q7SX63_CHICK Heat shock protein 70 OS=Gallus gallus OX=9031 GN=HSP70 PE=3 SV=1;tr|B3VHV2|B3VHV2_CHICK Heat shock protein 70 OS=Gallus gallus OX=9031 GN=HSP70 PE=2 SV=1;tr|B6EAX2|B6EAX2_CHICK Heat shock protein 70 OS=Gallus gallus OX=9031 GN=HSP70	18	38	38	24	57.9	69.912	634	323.31	0.709867	0.781416	0.911581	1.07055	0.968404	1.04434	1.28317	0.0270306
Q90X55;A0A1D5NYF3;A0A0N7G7I8;Q6VYQ9	Q90X55;A0A1D5NYF3;A0A0N7G7I8	tr|Q90X55|Q90X55_CHICK Adipocyte fatty acid binding protein OS=Gallus gallus OX=9031 GN=AFABP PE=2 SV=2;tr|A0A1D5NYF3|A0A1D5NYF3_CHICK FABP domain-containing protein OS=Gallus gallus OX=9031 GN=FABP4 PE=3 SV=1;tr|A0A0N7G7I8|A0A0N7G7I8_CHICK Adipocyte fatty	4	4	3	3	29.5	14.894	132	8.7196	0.656065	0.679907	0.742816	1.03683	1.04383	0.855339	1.41236	0.0129404
Q90YA3;Q5ZHU4;F1NKB6;A0A1D5NYM1;A0A1D5P4S8;Q8AYP9	Q90YA3	tr|Q90YA3|Q90YA3_CHICK ATP-dependent 6-phosphofructokinase OS=Gallus gallus OX=9031 GN=pfk PE=2 SV=1	6	34	34	9	52.8	83.924	769	323.31	0.830402	0.887927	0.946321	1.17831	1.02585	1.11317	1.24494	0.0171585
Q98932	Q98932	sp|Q98932|RAB5C_CHICK Ras-related protein Rab-5C OS=Gallus gallus OX=9031 GN=RAB5C PE=1 SV=1	1	2	1	1	10.6	23.553	216	2.739	0.456578	0.507366		1.23416	1.22365		2.54974	0.00120317
Q9DEA4;H9KZU7;Q9PUQ7;A0A3Q2UAU4;Q9DEA6	Q9DEA4;H9KZU7;Q9PUQ7;A0A3Q2UAU4	tr|Q9DEA4|Q9DEA4_CHICK Skeletal muscle type tropomodulin (Fragment) OS=Gallus gallus OX=9031 GN=skTmod PE=2 SV=1;tr|H9KZU7|H9KZU7_CHICK Uncharacterized protein OS=Gallus gallus OX=9031 GN=TMOD4 PE=4 SV=3;tr|Q9PUQ7|Q9PUQ7_CHICK Sk-tropomodulin OS=Gallus gal	5	14	14	13	50.8	37.276	333	323.31	0.821674	0.844475	0.958936	1.17419	1.09347	1.12579	1.2927	0.00617268
Q9DEG4	Q9DEG4	tr|Q9DEG4|Q9DEG4_CHICK Nebulin (Fragment) OS=Gallus gallus OX=9031 PE=2 SV=1	1	58	23	23	61	104.69	904	219.28	0.780916	0.842891	0.974715	1.19508	1.08433	1.09984	1.30045	0.0176157
Q9W7P7;F1NJF0	Q9W7P7;F1NJF0	tr|Q9W7P7|Q9W7P7_CHICK p32 subunit of splicing factor SF2 (Fragment) OS=Gallus gallus OX=9031 GN=SF2 PE=2 SV=1;tr|F1NJF0|F1NJF0_CHICK Uncharacterized protein OS=Gallus gallus OX=9031 GN=C1QBP PE=4 SV=3	2	2	2	2	9.7	23.683	207	17.911	0.81869	0.706644	0.823804	0.933404	0.964944	1.06372	1.26092	0.0203184
R4GGQ4	R4GGQ4	tr|R4GGQ4|R4GGQ4_CHICK zf-Tim10_DDP domain-containing protein OS=Gallus gallus OX=9031 GN=TIMM13 PE=3 SV=2	1	1	1	1	10.9	10.958	101	3.8581		0.813034	0.846692		1.09934	1.1093	1.33072	0.00406443
R4GI80;REV__E1BX08	R4GI80	tr|R4GI80|R4GI80_CHICK Uncharacterized protein OS=Gallus gallus OX=9031 GN=SYNPO PE=4 SV=3	2	14	14	14	17.2	117.82	1146	194.86	0.852574	0.965067	0.973693	1.17865	1.16113	1.10891	1.2355	0.00777028
R4GI86;F1NV80;A0A1L1RL30;A0A3Q3A8S4	R4GI86	tr|R4GI86|R4GI86_CHICK Uncharacterized protein OS=Gallus gallus OX=9031 GN=CAB39 PE=4 SV=1	4	4	4	4	9.1	39.899	341	5.4214	0.807734	0.891693	0.967657	1.11622	1.07125	1.04608	1.21239	0.020185
R4GJW8;P62149;A0A1D5P2H5;A0A3Q3AZM2;F2Z4K8;O93410;P05419	R4GJW8;P62149;A0A1D5P2H5;A0A3Q3AZM2;F2Z4K8;O93410;P05419	tr|R4GJW8|R4GJW8_CHICK Calmodulin OS=Gallus gallus OX=9031 GN=CALM PE=3 SV=1;sp|P62149|CALM_CHICK Calmodulin OS=Gallus gallus OX=9031 GN=CALM PE=1 SV=2;tr|A0A1D5P2H5|A0A1D5P2H5_CHICK Uncharacterized protein OS=Gallus gallus OX=9031 GN=CALM2 PE=3 SV=2;tr|A0	7	11	10	8	67.8	16.837	149	216.31	0.817573	0.901994	0.843572	1.11934	1.02452	1.26113	1.32844	0.0185122
R4GLP0	R4GLP0	tr|R4GLP0|R4GLP0_CHICK Uncharacterized protein OS=Gallus gallus OX=9031 GN=COX7C PE=4 SV=2	1	2	2	2	12.9	15.062	140	5.2939	0.79093	0.884107	0.954246	1.16769	1.06058	1.07065	1.25469	0.0186804
R4GM10;P53449;B4Z858	R4GM10	tr|R4GM10|R4GM10_CHICK Fructose-bisphosphate aldolase OS=Gallus gallus OX=9031 GN=ALDOC PE=3 SV=1	3	11	11	9	33.8	39.36	364	260.11	0.789821	0.821159	0.880865	1.18583	1.01342	1.20212	1.365	0.0100846
A0A1D5NXR2	A0A1D5NXR2	tr|A0A1D5NXR2|A0A1D5NXR2_CHICK Uncharacterized protein OS=Gallus gallus OX=9031 GN=BCAP31 PE=4 SV=1	1	5	5	5	17.1	27.228	240	11.462	1.2366	1.08974	1.2288	0.913748	1.02831	0.929622	0.807756	0.0188076
A0A1D5P0Y1;Q5ZKF0;A0A1L1RNV9	A0A1D5P0Y1;Q5ZKF0;A0A1L1RNV9	tr|A0A1D5P0Y1|A0A1D5P0Y1_CHICK TPR_REGION domain-containing protein OS=Gallus gallus OX=9031 GN=OGT PE=4 SV=2;tr|Q5ZKF0|Q5ZKF0_CHICK TPR_REGION domain-containing protein OS=Gallus gallus OX=9031 GN=RCJMB04_11d15 PE=2 SV=1;tr|A0A1L1RNV9|A0A1L1RNV9_CHICK TPR	3	2	2	2	2	115.51	1035	3.4933	1.41657	1.38153	1.02708	0.785178	0.756223	0.962744	0.654648	0.0347874
A0A1D5P6V5;A0A3Q2UKL3	A0A1D5P6V5;A0A3Q2UKL3	tr|A0A1D5P6V5|A0A1D5P6V5_CHICK Perilipin OS=Gallus gallus OX=9031 GN=PLIN4 PE=3 SV=1;tr|A0A3Q2UKL3|A0A3Q2UKL3_CHICK Perilipin OS=Gallus gallus OX=9031 GN=PLIN5 PE=3 SV=1	2	6	6	6	14.5	45.388	429	21.421	1.22224	1.04832	1.14441	0.907451	1.02277	0.874746	0.821372	0.0393172
A0A1D5PEK3;O42133	A0A1D5PEK3;O42133	tr|A0A1D5PEK3|A0A1D5PEK3_CHICK Uncharacterized protein OS=Gallus gallus OX=9031 GN=CAPN1 PE=3 SV=2;tr|O42133|O42133_CHICK Mu-calpain large subunit OS=Gallus gallus OX=9031 PE=2 SV=1	2	9	9	9	11.5	81.435	715	34.86	1.23936	1.2785	1.0883	0.968041	0.933279	0.969863	0.79619	0.0143932
A0A1D5PGY8	A0A1D5PGY8	tr|A0A1D5PGY8|A0A1D5PGY8_CHICK CS domain-containing protein OS=Gallus gallus OX=9031 GN=PTGES3L PE=4 SV=2	1	2	2	2	15.1	18.146	152	2.0197	1.19436	1.40843	1.10037	0.953497	0.911473	0.841222	0.730779	0.0265119
A0A1D5PJI9	A0A1D5PJI9	tr|A0A1D5PJI9|A0A1D5PJI9_CHICK Uncharacterized protein OS=Gallus gallus OX=9031 GN=VPS13A PE=4 SV=2	1	2	2	2	0.6	360.66	3193	3.0953	1.28181	1.25274	1.26449	0.803009	0.870031	0.851887	0.664624	4.03565e-05
A0A1D5PKQ4;A0A1D5NY11;A0A1D5P959;A0A1D5PE57;P12105;Q90612	A0A1D5PKQ4;A0A1D5NY11;A0A1D5P959;A0A1D5PE57;P12105	tr|A0A1D5PKQ4|A0A1D5PKQ4_CHICK Collagen alpha-1(III) chain OS=Gallus gallus OX=9031 GN=COL3A1 PE=4 SV=2;tr|A0A1D5NY11|A0A1D5NY11_CHICK Collagen alpha-1(III) chain OS=Gallus gallus OX=9031 GN=COL3A1 PE=4 SV=2;tr|A0A1D5P959|A0A1D5P959_CHICK Collagen alpha-1(	6	10	9	9	7.6	132.44	1384	37.046	1.62026	1.48163	1.63498	0.847919	0.82863	0.741372	0.510447	0.000193729
A0A1D5PTE8;Q5ZJ22	A0A1D5PTE8;Q5ZJ22	tr|A0A1D5PTE8|A0A1D5PTE8_CHICK Glia maturation factor OS=Gallus gallus OX=9031 GN=GMFB PE=3 SV=2;tr|Q5ZJ22|Q5ZJ22_CHICK Glia maturation factor OS=Gallus gallus OX=9031 GN=RCJMB04_21j8 PE=2 SV=1	2	2	2	2	16.3	16.592	141	23.872	1.2148	1.26256	1.13764	0.818506	0.928179	0.795215	0.703153	0.00284843
A0A1D5PYU1	A0A1D5PYU1	tr|A0A1D5PYU1|A0A1D5PYU1_CHICK Collagen alpha-1(I) chain OS=Gallus gallus OX=9031 GN=COL1A1 PE=4 SV=2	1	19	19	3	12.5	137.78	1453	176.54	1.23082	1.20195	1.76924	0.628811	0.582154	0.563571	0.422307	0.0120412
A0A1I7Q403;Q90879	A0A1I7Q403;Q90879	tr|A0A1I7Q403|A0A1I7Q403_CHICK Ubiquitin-conjugating enzyme E2 variant 1 OS=Gallus gallus OX=9031 GN=UBE2V1 PE=4 SV=2;sp|Q90879|UB2V1_CHICK Ubiquitin-conjugating enzyme E2 variant 1 OS=Gallus gallus OX=9031 GN=UBE2V1 PE=2 SV=2	2	4	1	1	32	16.463	147	1.8911	1.31405	1.24486	1.0846	0.854889	0.927219	0.910146	0.738919	0.0113118
A0A1I7Q432;Q1KME6;R4GJ51;A0A3Q2UIM5;A0A3Q2TZA9;A0A3Q3A9N4;F1P0F8	A0A1I7Q432;Q1KME6;R4GJ51;A0A3Q2UIM5;A0A3Q2TZA9;A0A3Q3A9N4;F1P0F8	tr|A0A1I7Q432|A0A1I7Q432_CHICK Ras-related protein Rab-6A OS=Gallus gallus OX=9031 GN=RAB6A PE=4 SV=1;sp|Q1KME6|RAB6A_CHICK Ras-related protein Rab-6A OS=Gallus gallus OX=9031 GN=RAB6A PE=2 SV=3;tr|R4GJ51|R4GJ51_CHICK Uncharacterized protein OS=Gallus gall	7	2	2	2	11.5	19.614	174	2.4974	1.24979	1.02161	1.12397	0.800227	0.88101	0.956831	0.776962	0.0343249
A0A1L1RIQ6;A0A1D5PNV6;F1NNQ3;Q5ZIL2	A0A1L1RIQ6;A0A1D5PNV6;F1NNQ3;Q5ZIL2	tr|A0A1L1RIQ6|A0A1L1RIQ6_CHICK Vacuolar protein sorting-associated protein 29 OS=Gallus gallus OX=9031 GN=VPS29 PE=3 SV=1;tr|A0A1D5PNV6|A0A1D5PNV6_CHICK Vacuolar protein sorting-associated protein 29 OS=Gallus gallus OX=9031 GN=VPS29 PE=3 SV=2;tr|F1NNQ3|F1	4	1	1	1	7.1	20.517	182	10.871	1.24996	1.14675	1.27728	0.842563	1.05224	0.867265	0.75179	0.0169831
A0A1L1RLN6;P02607;A0A3Q2U5H1;A0A1D5PEM4	A0A1L1RLN6;P02607;A0A3Q2U5H1;A0A1D5PEM4	tr|A0A1L1RLN6|A0A1L1RLN6_CHICK Myosin light polypeptide 6 OS=Gallus gallus OX=9031 GN=MYL6 PE=4 SV=2;sp|P02607|MYL6_CHICK Myosin light polypeptide 6 OS=Gallus gallus OX=9031 GN=MYL6 PE=1 SV=3;tr|A0A3Q2U5H1|A0A3Q2U5H1_CHICK Myosin light polypeptide 6 OS=Gal	4	4	4	4	26.7	16.838	150	16.048	1.18562	1.17757	1.03616	0.968938	0.786813	0.884185	0.776602	0.0240942
A0A1L1S0E4;F1P418	A0A1L1S0E4;F1P418	tr|A0A1L1S0E4|A0A1L1S0E4_CHICK TP_methylase domain-containing protein OS=Gallus gallus OX=9031 GN=DPH5 PE=4 SV=2;tr|F1P418|F1P418_CHICK TP_methylase domain-containing protein OS=Gallus gallus OX=9031 GN=DPH5 PE=3 SV=2	2	1	1	1	6.9	19.477	174	2.9569	1.39184	1.21895	1.15861	0.889895	0.935059	0.886422	0.719312	0.00790764
A0A286QZR1;A0A292SXQ0;F1NJK8	A0A286QZR1;A0A292SXQ0;F1NJK8	tr|A0A286QZR1|A0A286QZR1_CHICK Arginine methyltransferase 1 variant 1 OS=Gallus gallus OX=9031 GN=prmt1 PE=2 SV=1;tr|A0A292SXQ0|A0A292SXQ0_CHICK Arginine methyltransferase 1 variant 2 OS=Gallus gallus OX=9031 GN=prmt1 PE=2 SV=1;tr|F1NJK8|F1NJK8_CHICK Uncha	3	2	2	2	6	40.404	351	1.727	1.78567	1.61277	1.11545	0.731037	0.844491	0.951171	0.55976	0.0347214
A0A3Q2TSV4	A0A3Q2TSV4	tr|A0A3Q2TSV4|A0A3Q2TSV4_CHICK Uncharacterized protein OS=Gallus gallus OX=9031 PE=4 SV=1	1	1	1	1	2.4	53.818	451	1.7786	2.06757	1.90902	0.974913	0.620617	0.515904	0.599938	0.350694	0.0351823
A0A3Q2U769	A0A3Q2U769	tr|A0A3Q2U769|A0A3Q2U769_CHICK GOLD domain-containing protein OS=Gallus gallus OX=9031 GN=TMED2 PE=3 SV=1	1	3	3	1	17.8	23.29	208	14.587	1.40951	1.61799	1.12305	0.773784	0.7287	0.92222	0.584189	0.0205925
A0A3Q2U9K9;A0A3Q2TVP3;A0A1D5PTF1	A0A3Q2U9K9;A0A3Q2TVP3;A0A1D5PTF1	tr|A0A3Q2U9K9|A0A3Q2U9K9_CHICK Uncharacterized protein OS=Gallus gallus OX=9031 GN=SPEG PE=4 SV=1;tr|A0A3Q2TVP3|A0A3Q2TVP3_CHICK Uncharacterized protein OS=Gallus gallus OX=9031 GN=SPEG PE=4 SV=1;tr|A0A1D5PTF1|A0A1D5PTF1_CHICK Uncharacterized protein OS=Ga	3	44	44	44	16	366.98	3362	117.3	1.24629	1.29272	1.05463	0.971797	0.945644	0.973563	0.804476	0.0332206
A0A3Q2UBV6;F1P4N9;F1N8W3;A0A3Q2UC30;A0A3Q2TUR8;A0A3Q2U321;Q6DMS3;A0A3Q2U1B0;Q9DEX4	A0A3Q2UBV6;F1P4N9;F1N8W3;A0A3Q2UC30;A0A3Q2TUR8;A0A3Q2U321;Q6DMS3;A0A3Q2U1B0	tr|A0A3Q2UBV6|A0A3Q2UBV6_CHICK Uncharacterized protein OS=Gallus gallus OX=9031 GN=POSTN PE=4 SV=1;tr|F1P4N9|F1P4N9_CHICK Uncharacterized protein OS=Gallus gallus OX=9031 GN=POSTN PE=4 SV=2;tr|F1N8W3|F1N8W3_CHICK Uncharacterized protein OS=Gallus gallus OX	9	13	13	13	17.5	89.666	801	61.434	1.03071	1.06668	1.18169	0.886457	0.836236	0.931952	0.809571	0.0174282
A0A3Q2UD70;A0A3Q3AZS4;A2N887	A0A3Q2UD70;A0A3Q3AZS4;A2N887	tr|A0A3Q2UD70|A0A3Q2UD70_CHICK Ig-like domain-containing protein OS=Gallus gallus OX=9031 PE=4 SV=1;tr|A0A3Q3AZS4|A0A3Q3AZS4_CHICK Ig-like domain-containing protein OS=Gallus gallus OX=9031 PE=4 SV=1;tr|A2N887|A2N887_CHICK VH1 protein (Fragment) OS=Gallus	3	4	2	0	48.5	10.728	101	9.256	1.32265	1.29973	1.34826	0.993667	0.799662	0.863399	0.669094	0.00173404
A0A3Q2UGE0;A0A3Q2UA24;A0A3Q2U6P5	A0A3Q2UGE0;A0A3Q2UA24;A0A3Q2U6P5	tr|A0A3Q2UGE0|A0A3Q2UGE0_CHICK Uncharacterized protein OS=Gallus gallus OX=9031 GN=LOC107051263 PE=4 SV=1;tr|A0A3Q2UA24|A0A3Q2UA24_CHICK Uncharacterized protein OS=Gallus gallus OX=9031 GN=LOC107051263 PE=4 SV=1;tr|A0A3Q2U6P5|A0A3Q2U6P5_CHICK Uncharacteriz	3	1	1	1	1.6	69.629	639	2.2432	1.45493	1.31159	1.35411	0.965468	1.1482	0.953225	0.744277	0.00988621
A0A3Q3AUQ1	A0A3Q3AUQ1	tr|A0A3Q3AUQ1|A0A3Q3AUQ1_CHICK Cytochrome c oxidase subunit 6A, mitochondrial OS=Gallus gallus OX=9031 PE=3 SV=1	1	3	3	3	29.6	10.78	98	5.8836	1.28717	1.17466	1.0625	0.937067	0.979976	0.966931	0.818305	0.0319839
A0A3Q3AZJ6;Q45KQ2;Q5ZLU8	A0A3Q3AZJ6;Q45KQ2;Q5ZLU8	tr|A0A3Q3AZJ6|A0A3Q3AZJ6_CHICK RRM domain-containing protein OS=Gallus gallus OX=9031 GN=CIRBP PE=4 SV=1;tr|Q45KQ2|Q45KQ2_CHICK Aggrecan promoter binding protein OS=Gallus gallus OX=9031 PE=2 SV=1;tr|Q5ZLU8|Q5ZLU8_CHICK Cold-inducible RNA-binding protein O	3	2	2	2	11.1	18.618	171	4.7167	1.18184	1.02427	1.14168	0.742168	0.910393	0.734661	0.713073	0.0125717
A2N883;A2N886;A2N885;A2N882;A2N881	A2N883;A2N886;A2N885;A2N882;A2N881	tr|A2N883|A2N883_CHICK VH1 protein (Fragment) OS=Gallus gallus OX=9031 GN=VH1 PE=2 SV=1;tr|A2N886|A2N886_CHICK VH1 protein (Fragment) OS=Gallus gallus OX=9031 GN=VH1 PE=2 SV=1;tr|A2N885|A2N885_CHICK VH1 protein (Fragment) OS=Gallus gallus OX=9031 GN=VH1 PE	5	5	5	1	35	12.437	120	14.85	1.19718	1.24539	1.2326	1.05986	0.795732	0.87932	0.744157	0.0167581
A7XMU6;A0A3Q2U3K1;A0A1D5PHV0;A0A1D5PIF5;A0A1D5NVX3;A0A3Q2U8I4;A0A3Q3A9F0;E1BWY8;A0A1L1RLW9;A0A1L1RYC9;A0A3Q2UDW3;A0A3Q2UC96;A0A3Q2TSX2;Q8QGJ2;A0A1D5PZL4;A0A1D5PQ02;A0A182C5X7;A0A1D5NY54;A0A1D5PRJ2;A0A182C6H9	A7XMU6;A0A3Q2U3K1;A0A1D5PHV0;A0A1D5PIF5;A0A1D5NVX3;A0A3Q2U8I4;A0A3Q3A9F0;E1BWY8;A0A1L1RLW9;A0A1L1RYC9;A0A3Q2UDW3;A0A3Q2UC96;A0A3Q2TSX2;Q8QGJ2;A0A1D5PZL4;A0A1D5PQ02;A0A182C5X7;A0A1D5NY54;A0A1D5PRJ2;A0A182C6H9	tr|A7XMU6|A7XMU6_CHICK NEDD4L (Fragment) OS=Gallus gallus OX=9031 PE=2 SV=1;tr|A0A3Q2U3K1|A0A3Q2U3K1_CHICK E3 ubiquitin-protein ligase OS=Gallus gallus OX=9031 GN=LOC107055431 PE=4 SV=1;tr|A0A1D5PHV0|A0A1D5PHV0_CHICK E3 ubiquitin-protein ligase OS=Gallus g	20	1	1	1	4.9	23.681	204	2.8703	1.1796	1.32039		0.936225	0.867418		0.721461	0.0470943
E1BSL7	E1BSL7	tr|E1BSL7|E1BSL7_CHICK Thioredoxin domain-containing protein OS=Gallus gallus OX=9031 GN=ERP44 PE=4 SV=3	1	2	2	2	6.2	46.976	406	22.436	1.25363	1.34684	0.996195	0.877182	0.929383	0.873618	0.745186	0.0454095
E1BT66;A0A1D5P411;A0A1D5PPI6;A0A3Q3AMH7	E1BT66	tr|E1BT66|E1BT66_CHICK Uncharacterized protein OS=Gallus gallus OX=9031 GN=TAF15 PE=4 SV=2	4	3	3	2	6.4	51.251	472	4.9807	1.40751	1.51525	1.12342	0.943633	0.840526	0.989836	0.685583	0.0274126
E1BV98	E1BV98	tr|E1BV98|E1BV98_CHICK Pantothenate kinase OS=Gallus gallus OX=9031 GN=PANK4 PE=3 SV=3	1	3	3	3	4.4	86.119	770	8.4581	1.63186	1.46059	1.05533	0.85442	0.927228	0.911774	0.649364	0.0481948
E1BY00;Q5ZLF9;A0A3Q2UNH1	E1BY00;Q5ZLF9;A0A3Q2UNH1	tr|E1BY00|E1BY00_CHICK Uncharacterized protein OS=Gallus gallus OX=9031 GN=SRSF5 PE=4 SV=2;tr|Q5ZLF9|Q5ZLF9_CHICK RRM domain-containing protein OS=Gallus gallus OX=9031 GN=RCJMB04_6g11 PE=2 SV=1;tr|A0A3Q2UNH1|A0A3Q2UNH1_CHICK RRM domain-containing protein	3	3	3	3	14	30.414	264	5.3818	1.60739	1.60757	1.12335	0.887798	0.843111	0.930763	0.613528	0.0267462
E1C3R1	E1C3R1	tr|E1C3R1|E1C3R1_CHICK PCI domain-containing protein OS=Gallus gallus OX=9031 GN=COPS7B PE=4 SV=3	1	2	2	2	6.5	44.841	400	20.777	1.37123	1.37774	1.25416	1.01647	0.847481	0.793234	0.663775	0.00459331
E1C4C6;A0A1D5PRI5	E1C4C6;A0A1D5PRI5	tr|E1C4C6|E1C4C6_CHICK Calponin-homology (CH) domain-containing protein OS=Gallus gallus OX=9031 GN=SMTNL2 PE=4 SV=1;tr|A0A1D5PRI5|A0A1D5PRI5_CHICK Calponin-homology (CH) domain-containing protein OS=Gallus gallus OX=9031 GN=SMTNL2 PE=4 SV=1	2	6	6	6	19	50.783	458	29.544	1.19079	1.34147	1.28017	1.01663	0.883576	0.807725	0.710292	0.00803502
E1C8A2;A0A1D5PGC2	E1C8A2;A0A1D5PGC2	tr|E1C8A2|E1C8A2_CHICK POTRA domain-containing protein OS=Gallus gallus OX=9031 GN=SAMM50 PE=4 SV=1;tr|A0A1D5PGC2|A0A1D5PGC2_CHICK POTRA domain-containing protein OS=Gallus gallus OX=9031 GN=SAMM50 PE=4 SV=2	2	2	2	2	7.9	52.22	469	8.6789	1.62683	1.64996	1.02858	0.722948	0.815028	0.887705	0.563409	0.0399641
F1N829;A0A1D5PDA2;F1P2W9;Q5F385	F1N829;A0A1D5PDA2;F1P2W9	tr|F1N829|F1N829_CHICK CULLIN_2 domain-containing protein OS=Gallus gallus OX=9031 GN=CUL2 PE=3 SV=2;tr|A0A1D5PDA2|A0A1D5PDA2_CHICK CULLIN_2 domain-containing protein OS=Gallus gallus OX=9031 GN=CUL2 PE=3 SV=1;tr|F1P2W9|F1P2W9_CHICK CULLIN_2 domain-contain	4	5	5	5	6.3	87.09	745	8.2414	1.27485	1.17381	1.04917	0.848662	0.893417	0.955059	0.771088	0.0208853
F1N8D4;A0A1D5PXM1;A0A3Q2U9M2;A0A1D5NYG3	F1N8D4;A0A1D5PXM1;A0A3Q2U9M2;A0A1D5NYG3	tr|F1N8D4|F1N8D4_CHICK Uncharacterized protein OS=Gallus gallus OX=9031 GN=FLNB PE=4 SV=4;tr|A0A1D5PXM1|A0A1D5PXM1_CHICK Uncharacterized protein OS=Gallus gallus OX=9031 GN=FLNB PE=4 SV=3;tr|A0A3Q2U9M2|A0A3Q2U9M2_CHICK Uncharacterized protein OS=Gallus gal	4	7	3	3	2.5	273	2549	3.2718	1.38304	1.52121	1.05395	0.730199	0.697078	0.999489	0.613099	0.0387682
F1NCK8;A0A1D5PTW6	F1NCK8;A0A1D5PTW6	tr|F1NCK8|F1NCK8_CHICK Glycophorin C OS=Gallus gallus OX=9031 GN=GYPC PE=2 SV=2;tr|A0A1D5PTW6|A0A1D5PTW6_CHICK Uncharacterized protein OS=Gallus gallus OX=9031 GN=CNTNAP2 PE=4 SV=2	2	1	1	1	9.7	10.071	93	2.8661	1.2499	1.31041	1.05603	0.938204	0.895571	1.00905	0.786106	0.0367229
F1NCS6	F1NCS6	tr|F1NCS6|F1NCS6_CHICK Uncharacterized protein OS=Gallus gallus OX=9031 GN=MTHFD1L PE=3 SV=3	1	3	3	3	3.4	106.89	988	16.053	1.3272	1.1998	1.12246	0.733136	0.982269	1.02064	0.749714	0.0479918
F1NDL4;A0A3Q2TSW8	F1NDL4;A0A3Q2TSW8	tr|F1NDL4|F1NDL4_CHICK Uncharacterized protein OS=Gallus gallus OX=9031 GN=NID2 PE=4 SV=4;tr|A0A3Q2TSW8|A0A3Q2TSW8_CHICK Uncharacterized protein OS=Gallus gallus OX=9031 GN=NID2 PE=4 SV=1	2	3	3	3	3.9	120.57	1127	17.996	1.24602	1.13012	1.33141	0.891513	0.982407	0.871294	0.740439	0.00900288
F1NSK8;Q5ZMJ1	F1NSK8;Q5ZMJ1	tr|F1NSK8|F1NSK8_CHICK Uncharacterized protein OS=Gallus gallus OX=9031 GN=ADPRH PE=4 SV=3;tr|Q5ZMJ1|Q5ZMJ1_CHICK Uncharacterized protein OS=Gallus gallus OX=9031 GN=RCJMB04_1o1 PE=2 SV=1	2	2	2	2	4.7	42.135	384	3.3212	1.34008	1.28955	1.37413	1.0025	1.0376	0.839518	0.719228	0.00469358
F1NSZ5	F1NSZ5	tr|F1NSZ5|F1NSZ5_CHICK Uncharacterized protein OS=Gallus gallus OX=9031 GN=LAMA4 PE=4 SV=2	1	12	12	12	8.2	202.47	1827	118.7	1.29662	1.21256	1.19779	0.964204	1.04787	0.94586	0.797937	0.00474469
F1NV47;A0A3Q2UHT9	F1NV47;A0A3Q2UHT9	tr|F1NV47|F1NV47_CHICK Uncharacterized protein OS=Gallus gallus OX=9031 GN=EHD4 PE=3 SV=4;tr|A0A3Q2UHT9|A0A3Q2UHT9_CHICK Uncharacterized protein OS=Gallus gallus OX=9031 GN=EHD4 PE=3 SV=1	2	4	2	2	7.6	61.285	542	4.1781	1.26711	1.27277		1.00534	0.88544		0.744437	0.032539
F1NV68;C6KIB2	F1NV68;C6KIB2	tr|F1NV68|F1NV68_CHICK Importin subunit alpha OS=Gallus gallus OX=9031 GN=KPNA3 PE=3 SV=3;tr|C6KIB2|C6KIB2_CHICK Importin alpha 4 (Fragment) OS=Gallus gallus OX=9031 GN=KPNA3 PE=2 SV=1	2	3	2	2	6.9	57.928	523	20.044	1.22538	1.21623	1.03864	0.907037	1.00675	0.893935	0.806757	0.0334643
F1NWN4	F1NWN4	tr|F1NWN4|F1NWN4_CHICK Uncharacterized protein OS=Gallus gallus OX=9031 GN=FBLN2 PE=4 SV=4	1	1	1	1	0.8	132.32	1196	2.428	1.28715	1.39255	1.03238	0.601164	0.555851	0.837344	0.537262	0.0142727
F1P0A1	F1P0A1	tr|F1P0A1|F1P0A1_CHICK Uncharacterized protein OS=Gallus gallus OX=9031 GN=XPNPEP1 PE=3 SV=2	1	3	3	3	3.9	70.014	623	2.7096	1.68309	1.69625	1.05442	0.691433	0.866526	0.854095	0.544019	0.0371182
P02467	P02467	sp|P02467|CO1A2_CHICK Collagen alpha-2(I) chain OS=Gallus gallus OX=9031 GN=COL1A2 PE=1 SV=3	1	17	17	17	14.2	128.99	1363	323.31	1.14066	1.12947	1.45367	0.757874	0.689448	0.729964	0.584696	0.00884553
P08286	P08286	sp|P08286|H110_CHICK Histone H1.10 OS=Gallus gallus OX=9031 PE=1 SV=3	1	7	1	1	33.2	22.003	220	17.195	1.15335	1.45306	1.03636	0.84061	0.816729	0.811307	0.677684	0.0346548
P15720;A0A3Q3A587;A0A1D5NWU0;A0A3Q2UDG6	P15720;A0A3Q3A587	sp|P15720|MBP_CHICK Myelin basic protein OS=Gallus gallus OX=9031 GN=MBP PE=1 SV=2;tr|A0A3Q3A587|A0A3Q3A587_CHICK Myelin basic protein OS=Gallus gallus OX=9031 GN=MBP PE=4 SV=1	4	3	3	3	15.5	18.808	174	5.6813	1.25708	1.21626	1.09214	0.863433	0.684511	0.914573	0.690656	0.0126862
P30352	P30352	sp|P30352|SRSF2_CHICK Serine/arginine-rich splicing factor 2 OS=Gallus gallus OX=9031 GN=SRSF2 PE=2 SV=1	1	1	1	1	7.7	25.524	221	12.771	1.64613	2.16237	1.15591	0.829544	0.631842	0.849098	0.46541	0.0415043
P37301;A0A1D5NXP5	P37301;A0A1D5NXP5	sp|P37301|MYP0_CHICK Myelin protein P0 OS=Gallus gallus OX=9031 GN=MPZ PE=2 SV=1;tr|A0A1D5NXP5|A0A1D5NXP5_CHICK Myelin protein P0 OS=Gallus gallus OX=9031 GN=MPZ PE=4 SV=1	2	2	2	2	7.6	27.466	249	6.5137	2.06297	1.40484	2.01481	1.03412	1.0801	0.801077	0.531735	0.0200997
P62207;A0A1I7Q435	P62207;A0A1I7Q435	sp|P62207|PP1B_CHICK Serine/threonine-protein phosphatase PP1-beta catalytic subunit OS=Gallus gallus OX=9031 GN=PPP1CB PE=1 SV=3;tr|A0A1I7Q435|A0A1I7Q435_CHICK Serine/threonine-protein phosphatase OS=Gallus gallus OX=9031 GN=PPP1CB PE=3 SV=1	2	7	2	2	26.3	37.186	327	13.826	1.15744	1.21002	0.973042	0.935351	0.844159	0.88957	0.799006	0.0430379
Q02020;F1NUL9;B4ZBS4	Q02020;F1NUL9	sp|Q02020|FIBB_CHICK Fibrinogen beta chain (Fragment) OS=Gallus gallus OX=9031 GN=FGB PE=1 SV=1;tr|F1NUL9|F1NUL9_CHICK Fibrinogen beta chain OS=Gallus gallus OX=9031 GN=FGB PE=4 SV=3	3	5	5	5	11.4	52.678	463	13.436	1.12072	1.00577	1.10771	0.896236	0.841691	0.87387	0.807556	0.00636715
Q156C5;Q156C7	Q156C5;Q156C7	tr|Q156C5|Q156C5_CHICK 5-AMP-activated protein kinase beta-2 non-catalytic subunit transcript variant 1 OS=Gallus gallus OX=9031 GN=PRKAB2 PE=2 SV=1;tr|Q156C7|Q156C7_CHICK 5-AMP-activated protein kinase beta-2 non-catalytic subunit transcript variant 2 O	2	1	1	1	4	30.428	272	2.417	1.28178	1.34142	1.01375	0.81937	0.91841	0.865171	0.715696	0.0302044
Q58I02;Q5ZLA4;K9J9Q6;G8XRU0	Q58I02	tr|Q58I02|Q58I02_CHICK Nicotinamide phosphoribosyltransferase OS=Gallus gallus OX=9031 GN=PBEF1 PE=2 SV=1	4	9	9	9	15.2	55.586	493	11.332	1.32435	1.19487	1.20717	0.932376	0.939247	0.962367	0.760519	0.00214501
Q5F327	Q5F327	tr|Q5F327|Q5F327_CHICK Uncharacterized protein OS=Gallus gallus OX=9031 GN=PPP1R2 PE=2 SV=1	1	4	4	4	21.9	26.024	237	14.349	1.25384	1.09014	1.06726	0.892762	0.921581	0.906494	0.79761	0.0178687
Q5F3X1;R4GHL2	Q5F3X1;R4GHL2	tr|Q5F3X1|Q5F3X1_CHICK Protein kinase C OS=Gallus gallus OX=9031 GN=PRKCA PE=2 SV=1;tr|R4GHL2|R4GHL2_CHICK Protein kinase C OS=Gallus gallus OX=9031 GN=PRKCA PE=3 SV=2	2	2	2	2	3.7	76.845	674	3.4069	1.7888	1.60739	1.1494	0.702855	0.645725	0.867542	0.487533	0.0182578
Q5ZJC3;A0A1D5P7G6	Q5ZJC3;A0A1D5P7G6	tr|Q5ZJC3|Q5ZJC3_CHICK RING finger and CHY zinc finger domain-containing protein 1 OS=Gallus gallus OX=9031 GN=RCHY1 PE=2 SV=1;tr|A0A1D5P7G6|A0A1D5P7G6_CHICK Uncharacterized protein OS=Gallus gallus OX=9031 GN=RCHY1 PE=4 SV=1	2	2	2	2	7.4	29.711	256	2.8576	1.36549	1.26075	0.977874	0.831263	0.823299	0.895735	0.707607	0.0408817
Q5ZK23	Q5ZK23	tr|Q5ZK23|Q5ZK23_CHICK Glutaredoxin domain-containing protein OS=Gallus gallus OX=9031 GN=GLRX5 PE=2 SV=1	1	2	2	2	11.7	17.425	162	3.3226	1.59344	1.87676	1.04792	0.679565	0.725723	0.867213	0.502974	0.0400245
Q5ZK63;A0A1D5P521;A0A182C621;A0A182C5X3	Q5ZK63;A0A1D5P521;A0A182C621;A0A182C5X3	sp|Q5ZK63|TCP4_CHICK Activated RNA polymerase II transcriptional coactivator p15 OS=Gallus gallus OX=9031 GN=SUB1 PE=2 SV=1;tr|A0A1D5P521|A0A1D5P521_CHICK PC4 domain-containing protein OS=Gallus gallus OX=9031 GN=RPTC15L PE=4 SV=1;tr|A0A182C621|A0A182C621_	4	2	2	2	15.9	14.237	126	8.7526	1.11672	1.06706	1.15143	0.891452	0.991713	0.834098	0.814721	0.016833
Q5ZKQ9;F1NZD3	Q5ZKQ9;F1NZD3	tr|Q5ZKQ9|Q5ZKQ9_CHICK RNA binding motif protein, X-linked OS=Gallus gallus OX=9031 GN=RBMX PE=2 SV=1;tr|F1NZD3|F1NZD3_CHICK RRM domain-containing protein OS=Gallus gallus OX=9031 GN=RBMX PE=4 SV=1	2	6	6	6	13.2	41.451	385	5.3901	1.07235	1.13437	1.09312	0.886016	0.907069	0.810666	0.789052	0.00253885
Q5ZM33;F1N8H6	Q5ZM33;F1N8H6	sp|Q5ZM33|HP1B3_CHICK Heterochromatin protein 1-binding protein 3 OS=Gallus gallus OX=9031 GN=HP1BP3 PE=2 SV=1;tr|F1N8H6|F1N8H6_CHICK Heterochromatin protein 1-binding protein 3 OS=Gallus gallus OX=9031 GN=HP1BP3 PE=4 SV=1	2	2	2	2	3.9	61.851	559	2.6196	1.33199	1.26204	1.13386	0.8125	0.919654	0.965308	0.723591	0.00953916
Q5ZM59	Q5ZM59	tr|Q5ZM59|Q5ZM59_CHICK FXYD domain-containing ion transport regulator OS=Gallus gallus OX=9031 GN=FXYD6 PE=2 SV=1	1	1	1	1	23.2	10.212	95	15.969	1.09569	1.13394	1.13673	0.837533	0.979189	0.762585	0.766199	0.0155523
Q6EE39;Q5ZKK8	Q6EE39;Q5ZKK8	tr|Q6EE39|Q6EE39_CHICK Ribosomal protein L19 (Fragment) OS=Gallus gallus OX=9031 PE=2 SV=1;tr|Q5ZKK8|Q5ZKK8_CHICK Ribosomal protein L19 OS=Gallus gallus OX=9031 GN=RPL19 PE=2 SV=1	2	3	3	3	20.7	20.766	174	27.495	1.19691	1.14001	1.01884	0.902112	0.926712	0.89748	0.812424	0.0169967
Q6EE60	Q6EE60	tr|Q6EE60|Q6EE60_CHICK Ribosomal protein L18 (Fragment) OS=Gallus gallus OX=9031 PE=2 SV=1	1	5	5	5	33.7	18.849	166	13.588	1.11607	1.13241	0.968871	0.844921	0.707987	0.886246	0.758126	0.0257144
Q8AWE3;Q5ZLP4;F1NBJ2;A0A1D5PED5	Q8AWE3;Q5ZLP4;F1NBJ2;A0A1D5PED5	tr|Q8AWE3|Q8AWE3_CHICK Serine/threonine-protein phosphatase 2A 55 kDa regulatory subunit B (Fragment) OS=Gallus gallus OX=9031 PE=2 SV=1;tr|Q5ZLP4|Q5ZLP4_CHICK Serine/threonine-protein phosphatase 2A 55 kDa regulatory subunit B OS=Gallus gallus OX=9031 GN=	4	2	2	2	5.2	49.697	426	3.0658	1.84748	1.75803	1.07157	0.70538	0.72002	0.953732	0.508679	0.0411694
Q8JIG5;A7UEB0	Q8JIG5;A7UEB0	tr|Q8JIG5|Q8JIG5_CHICK Alpha-1-acid glycoprotein OS=Gallus gallus OX=9031 GN=ogchi PE=2 SV=1;tr|A7UEB0|A7UEB0_CHICK Alpha-1-acid glycoprotein OS=Gallus gallus OX=9031 GN=OGCHI PE=2 SV=1	2	2	2	2	10.3	22.321	203	8.6911	1.60418	1.48147	1.32552	0.89567	0.888155	0.914538	0.611712	0.00213724
Q8QGU2	Q8QGU2	tr|Q8QGU2|Q8QGU2_CHICK Peptidylprolyl isomerase OS=Gallus gallus OX=9031 GN=FKBP12.6 PE=2 SV=1	1	1	1	1	12	11.957	108	24.51	1.41477	1.29167	1.11621	0.943909	0.947908	1.0645	0.773369	0.0386859
Q90576	Q90576	tr|Q90576|Q90576_CHICK 450 kDa protein (Fragment) OS=Gallus gallus OX=9031 PE=2 SV=1	1	2	1	1	7.1	47.43	465	5.1966	1.1806	1.22573		1.01814	0.966983		0.824957	0.0252426
Q90635;Q71SG1;Q71SG2	Q90635;Q71SG1;Q71SG2	sp|Q90635|DPYL2_CHICK Dihydropyrimidinase-related protein 2 OS=Gallus gallus OX=9031 GN=DPYSL2 PE=2 SV=1;tr|Q71SG1|Q71SG1_CHICK Collapsin response mediator protein-2B OS=Gallus gallus OX=9031 GN=CRMP2B PE=2 SV=1;tr|Q71SG2|Q71SG2_CHICK Collapsin response me	3	6	6	6	11.4	62.33	572	33.999	1.08896	1.17512	1.08898	0.961383	0.784594	0.921851	0.79564	0.0198107
Q91008;A5HUM6	Q91008;A5HUM6	tr|Q91008|Q91008_CHICK Tenascin Y variant OS=Gallus gallus OX=9031 GN=tn-y PE=2 SV=1;tr|A5HUM6|A5HUM6_CHICK Tenascin X B OS=Gallus gallus OX=9031 GN=TNXB PE=4 SV=1	2	6	6	6	16	206.58	1914	77.495	1.50521	1.14852	1.13382	0.728445	0.839599	0.832487	0.633794	0.0217463
Q9IAU4;A0A1D5PE74;Q90796;A0A1L1RNI7;Q90589	Q9IAU4;A0A1D5PE74;Q90796;A0A1L1RNI7	tr|Q9IAU4|Q9IAU4_CHICK Alpha 1 (V) collagen OS=Gallus gallus OX=9031 PE=2 SV=1;tr|A0A1D5PE74|A0A1D5PE74_CHICK Fibrillar collagen NC1 domain-containing protein OS=Gallus gallus OX=9031 GN=COL5A1 PE=4 SV=2;tr|Q90796|Q90796_CHICK Alpha-1 type XI collagen (Fra	5	3	3	3	1.5	184.12	1835	3.9807	1.13985	1.10252	1.2328	0.901337	0.991411	0.883502	0.798883	0.010377
R4GGF3	R4GGF3	tr|R4GGF3|R4GGF3_CHICK SCP domain-containing protein OS=Gallus gallus OX=9031 GN=GLIPR2 PE=3 SV=1	1	2	2	2	12.3	16.922	154	6.766	1.06142	1.04803	1.11729	0.859289	0.796134	0.879865	0.785712	0.00219334
R4GJY1	R4GJY1	tr|R4GJY1|R4GJY1_CHICK ORM1-like protein OS=Gallus gallus OX=9031 GN=ORMDL3 PE=3 SV=2	1	1	1	1	9.8	17.665	153	2.5467	1.53596	1.65922		0.620749	0.666645		0.402917	0.0047192

## Sheet: 150 d vs. 120 d
Protein IDs	Majority protein IDs	Fasta headers	Number of proteins	Peptides	Razor + unique peptides	Unique peptides	Sequence coverage [%]	Mol. weight [kDa]	Sequence length	Score	Ratio BX1	Ratio BX2	Ratio BX3	Ratio CX1	Ratio CX2	Ratio CX3	FC	P.value
A0A1D5NTT1;A0A3Q2UMF4;F1NIP2	A0A1D5NTT1;A0A3Q2UMF4;F1NIP2	tr|A0A1D5NTT1|A0A1D5NTT1_CHICK 5-demethoxyubiquinone hydroxylase, mitochondrial OS=Gallus gallus OX=9031 GN=COQ7 PE=3 SV=2;tr|A0A3Q2UMF4|A0A3Q2UMF4_CHICK Uncharacterized protein OS=Gallus gallus OX=9031 GN=COQ7 PE=4 SV=1;tr|F1NIP2|F1NIP2_CHICK 5-demethoxyu	3	1	1	1	7.6	24.78	225	3.1957	0.875977	0.78583		1.11635	1.17076		1.37628	0.0272014
A0A1D5P3K4	A0A1D5P3K4	tr|A0A1D5P3K4|A0A1D5P3K4_CHICK NADH dehydrogenase [ubiquinone] 1 alpha subcomplex subunit 8 OS=Gallus gallus OX=9031 GN=NDUFA8 PE=3 SV=1	1	1	1	1	8.7	20.125	172	13.997	0.898564	0.439204	1.10577	1.56332	1.46412	1.43822	1.82754	0.028307
A0A1D5PIL5;Q5ZMD1;Q5ZM05	A0A1D5PIL5;Q5ZMD1;Q5ZM05	tr|A0A1D5PIL5|A0A1D5PIL5_CHICK 14-3-3 protein theta OS=Gallus gallus OX=9031 GN=YWHAQ PE=3 SV=1;sp|Q5ZMD1|1433T_CHICK 14-3-3 protein theta OS=Gallus gallus OX=9031 GN=YWHAQ PE=1 SV=1;tr|Q5ZM05|Q5ZM05_CHICK 14_3_3 domain-containing protein (Fragment) OS=Gal	3	10	5	5	45.3	27.205	236	38.329	0.865477	0.839294	0.884123	0.990288	1.08538	1.0507	1.20761	0.00428469
A0A1L1RRM0	A0A1L1RRM0	tr|A0A1L1RRM0|A0A1L1RRM0_CHICK Uncharacterized protein OS=Gallus gallus OX=9031 GN=VTA1 PE=4 SV=2	1	1	1	1	3.6	42.897	391	1.98		0.65068	0.685997		1.08661	1.28629	1.77523	0.0362257
A0A3Q2UFV6;E1C8N1	A0A3Q2UFV6;E1C8N1	tr|A0A3Q2UFV6|A0A3Q2UFV6_CHICK Uncharacterized protein OS=Gallus gallus OX=9031 GN=COMP PE=4 SV=1;tr|E1C8N1|E1C8N1_CHICK Uncharacterized protein OS=Gallus gallus OX=9031 GN=COMP PE=4 SV=2	2	4	4	4	11	83.381	761	14.025	0.516905	1.05517	0.803197	1.7109	1.59453	1.39066	1.97707	0.0130252
F1NX22;A0A1D5P8I8;A0A1L1RPW4;P13944;Q9PSR4	F1NX22;A0A1D5P8I8;A0A1L1RPW4;P13944	tr|F1NX22|F1NX22_CHICK Collagen alpha-1(XII) chain OS=Gallus gallus OX=9031 GN=COL12A1 PE=4 SV=4;tr|A0A1D5P8I8|A0A1D5P8I8_CHICK Collagen alpha-1(XII) chain OS=Gallus gallus OX=9031 GN=COL12A1 PE=4 SV=2;tr|A0A1L1RPW4|A0A1L1RPW4_CHICK Collagen alpha-1(XII) c	5	4	4	4	1.6	333.51	3065	4.9815	0.880156	0.916784	0.698999	1.69912	1.49497	1.04172	1.69708	0.0477895
O57378;F1NDD6	O57378;F1NDD6	tr|O57378|O57378_CHICK Receptor-associated protein OS=Gallus gallus OX=9031 GN=rap PE=2 SV=1;tr|F1NDD6|F1NDD6_CHICK Uncharacterized protein OS=Gallus gallus OX=9031 GN=LRPAP1 PE=4 SV=1	2	3	3	3	10.1	40.817	348	27.088	0.91529	0.902093	0.893027	1.13251	0.985738	1.17679	1.2157	0.0284544
P02467	P02467	sp|P02467|CO1A2_CHICK Collagen alpha-2(I) chain OS=Gallus gallus OX=9031 GN=COL1A2 PE=1 SV=3	1	17	17	17	14.2	128.99	1363	323.31	0.757874	0.689448	0.729964	1.40056	1.44985	0.921779	1.73251	0.0350144
P15720;A0A3Q3A587;A0A1D5NWU0;A0A3Q2UDG6	P15720;A0A3Q3A587	sp|P15720|MBP_CHICK Myelin basic protein OS=Gallus gallus OX=9031 GN=MBP PE=1 SV=2;tr|A0A3Q3A587|A0A3Q3A587_CHICK Myelin basic protein OS=Gallus gallus OX=9031 GN=MBP PE=4 SV=1	4	3	3	3	15.5	18.808	174	5.6813	0.863433	0.684511	0.914573	1.01735	1.30825	1.25037	1.45216	0.0303688
P62207;A0A1I7Q435	P62207;A0A1I7Q435	sp|P62207|PP1B_CHICK Serine/threonine-protein phosphatase PP1-beta catalytic subunit OS=Gallus gallus OX=9031 GN=PPP1CB PE=1 SV=3;tr|A0A1I7Q435|A0A1I7Q435_CHICK Serine/threonine-protein phosphatase OS=Gallus gallus OX=9031 GN=PPP1CB PE=3 SV=1	2	7	2	2	26.3	37.186	327	13.826	0.935351	0.844159	0.88957	1.17614	1.01351	1.15685	1.25381	0.0173011
Q5ZI39;A0A1D5PE96	Q5ZI39;A0A1D5PE96	tr|Q5ZI39|Q5ZI39_CHICK Uncharacterized protein OS=Gallus gallus OX=9031 GN=PLS3 PE=2 SV=1;tr|A0A1D5PE96|A0A1D5PE96_CHICK Uncharacterized protein OS=Gallus gallus OX=9031 GN=PLS3 PE=4 SV=2	2	1	1	1	1.4	70.823	628	1.7138	0.748362	0.964661	0.854026	1.19255	1.23585	1.12474	1.38413	0.00948802
Q6EE60	Q6EE60	tr|Q6EE60|Q6EE60_CHICK Ribosomal protein L18 (Fragment) OS=Gallus gallus OX=9031 PE=2 SV=1	1	5	5	5	33.7	18.849	166	13.588	0.844921	0.707987	0.886246	1.08025	1.14385	0.941944	1.29801	0.0393184
R4GJY1	R4GJY1	tr|R4GJY1|R4GJY1_CHICK ORM1-like protein OS=Gallus gallus OX=9031 GN=ORMDL3 PE=3 SV=2	1	1	1	1	9.8	17.665	153	2.5467	0.620749	0.666645		0.93469	1.07452		1.56068	0.0391455
A0A1D5PBF6;Q5ZLR0	A0A1D5PBF6;Q5ZLR0	tr|A0A1D5PBF6|A0A1D5PBF6_CHICK Uncharacterized protein OS=Gallus gallus OX=9031 GN=FLII PE=4 SV=2;tr|Q5ZLR0|Q5ZLR0_CHICK Uncharacterized protein OS=Gallus gallus OX=9031 GN=RCJMB04_5c11 PE=2 SV=1	2	3	3	3	2.5	140.64	1228	4.7152		1.15791	1.15085		0.844253	0.908085	0.758997	0.0130612
F1N9B7;A0A3Q2TZD8	F1N9B7;A0A3Q2TZD8	tr|F1N9B7|F1N9B7_CHICK Uncharacterized protein OS=Gallus gallus OX=9031 GN=RAD23B PE=4 SV=4;tr|A0A3Q2TZD8|A0A3Q2TZD8_CHICK Uncharacterized protein OS=Gallus gallus OX=9031 GN=RAD23B PE=4 SV=1	2	3	3	3	5.4	53.54	504	5.5049	1.07359	1.27655	1.11534	0.998058	0.846345	0.967035	0.81127	0.0477542
F1NE32	F1NE32	tr|F1NE32|F1NE32_CHICK MSP domain-containing protein OS=Gallus gallus OX=9031 GN=MOSPD1 PE=4 SV=2	1	3	3	3	12	24.424	216	4.975	1.21274	1.15955	1.07734	0.959329	0.884932	1.00408	0.825696	0.0188406
F1NUK7	F1NUK7	sp|F1NUK7|FLRT3_CHICK Leucine-rich repeat transmembrane protein FLRT3 OS=Gallus gallus OX=9031 GN=FLRT3 PE=1 SV=2	1	1	1	1	2.3	73.291	647	2.3473	1.65939		1.44472	0.974747		0.777257	0.564414	0.0435231
F1NYV8;Q7ZT11	F1NYV8;Q7ZT11	tr|F1NYV8|F1NYV8_CHICK Ankyrin repeat domain-containing protein 1 OS=Gallus gallus OX=9031 GN=ANKRD1 PE=4 SV=1;sp|Q7ZT11|ANKR1_CHICK Ankyrin repeat domain-containing protein 1 OS=Gallus gallus OX=9031 GN=ANKRD1 PE=2 SV=1	2	3	3	3	11.6	36.272	319	21.084	1.17869		1.19501	0.960871		0.904668	0.785918	0.0130049
P08288;F1NME1	P08288;F1NME1	sp|P08288|H11R_CHICK Histone H1.11R OS=Gallus gallus OX=9031 PE=3 SV=2;tr|F1NME1|F1NME1_CHICK H15 domain-containing protein OS=Gallus gallus OX=9031 GN=HIST1H111R PE=3 SV=1	2	8	2	1	37	21.803	219	5.6274	1.21374	1.2165	1.08533	0.957711	0.893024	0.798242	0.753499	0.0103565
P63247;E6N1V8;A0A1I7Q3Y2	P63247;E6N1V8;A0A1I7Q3Y2	sp|P63247|RACK1_CHICK Receptor of activated protein C kinase 1 OS=Gallus gallus OX=9031 GN=RACK1 PE=2 SV=1;tr|E6N1V8|E6N1V8_CHICK Guanine nucleotide-binding protein beta subunit2-like 1 OS=Gallus gallus OX=9031 GN=GNB2L1 PE=4 SV=1;tr|A0A1I7Q3Y2|A0A1I7Q3Y2_	3	6	6	6	23.3	35.076	317	33.654	1.1179	1.0345	0.913967	0.811669	0.826289	0.878613	0.820702	0.0428896
Q2HZ96	Q2HZ96	sp|Q2HZ96|AT1B4_CHICK Protein ATP1B4 OS=Gallus gallus OX=9031 GN=ATP1B4 PE=1 SV=1	1	2	2	2	8.1	36.362	321	6.2521	1.05184	1.06825	1.05535	0.742315	0.769892	0.880357	0.75346	0.00355758
Q5ZMI7	Q5ZMI7	tr|Q5ZMI7|Q5ZMI7_CHICK Uncharacterized protein OS=Gallus gallus OX=9031 GN=RCJMB04_1o16 PE=2 SV=1	1	11	1	1	17.7	80.79	710	11.228	1.51116	1.27126	1.31855	0.680133	0.976449	0.883763	0.61945	0.0103762
Q98932	Q98932	sp|Q98932|RAB5C_CHICK Ras-related protein Rab-5C OS=Gallus gallus OX=9031 GN=RAB5C PE=1 SV=1	1	2	1	1	10.6	23.553	216	2.739	1.23416	1.22365		1.01316	0.899667		0.778265	0.0410657

## Sheet: 150 d vs. 90 d
Protein IDs	Majority protein IDs	Fasta headers	Number of proteins	Peptides	Razor + unique peptides	Unique peptides	Sequence coverage [%]	Mol. weight [kDa]	Sequence length	Score	Ratio AX1	Ratio AX2	Ratio AX3	Ratio CX1	Ratio CX2	Ratio CX3	FC	P.value
A0A0A0MQ61;Q9W6J3;A0A1D5NT70	A0A0A0MQ61;Q9W6J3;A0A1D5NT70	tr|A0A0A0MQ61|A0A0A0MQ61_CHICK Uncharacterized protein OS=Gallus gallus OX=9031 GN=GSTAL2 PE=4 SV=1;tr|Q9W6J3|Q9W6J3_CHICK Glutathione S-transferase class-alpha (Fragment) OS=Gallus gallus OX=9031 PE=2 SV=1;tr|A0A1D5NT70|A0A1D5NT70_CHICK Uncharacterized pr	3	3	3	3	15.8	25.222	221	4.2907	0.656045	0.568356	0.949177	1.29579	1.49101	1.17532	1.82286	0.0155333
A0A1D5NU19	A0A1D5NU19	tr|A0A1D5NU19|A0A1D5NU19_CHICK Uncharacterized protein OS=Gallus gallus OX=9031 GN=WDR11 PE=4 SV=2	1	1	1	1	0.7	136.09	1222	1.7586	0.793405	0.849847	0.708345	1.39228	1.44433	1.07631	1.66394	0.0130343
A0A1D5NW68	A0A1D5NW68	tr|A0A1D5NW68|A0A1D5NW68_CHICK Serum albumin OS=Gallus gallus OX=9031 GN=ALB PE=4 SV=2	1	40	40	4	72	64.004	565	323.31	0.80761	0.798048	0.973007	1.11784	1.22684	1.04742	1.31544	0.0245545
A0A1D5P0B5	A0A1D5P0B5	tr|A0A1D5P0B5|A0A1D5P0B5_CHICK BTB domain-containing protein OS=Gallus gallus OX=9031 GN=KLHL41 PE=4 SV=1	1	19	19	19	31.2	68.552	606	213.63	0.662984	0.743428	0.861061	0.992431	1.0854	0.932944	1.32781	0.0270013
A0A1D5P2Y6	A0A1D5P2Y6	tr|A0A1D5P2Y6|A0A1D5P2Y6_CHICK Uncharacterized protein OS=Gallus gallus OX=9031 GN=PBXIP1 PE=4 SV=1	1	7	7	7	16.4	67.263	622	61.604	0.752765	0.789411	0.936656	0.995751	1.1048	1.0396	1.26679	0.0268492
A0A1D5P470	A0A1D5P470	tr|A0A1D5P470|A0A1D5P470_CHICK Glutathione S-transferase OS=Gallus gallus OX=9031 GN=GST2L PE=3 SV=2	1	9	9	7	38.4	25.449	219	104.32	0.895701	0.917607	0.897044	1.21925	1.19404	1.18003	1.32577	2.60884e-05
A0A1D5P909	A0A1D5P909	tr|A0A1D5P909|A0A1D5P909_CHICK PDZ domain-containing protein OS=Gallus gallus OX=9031 GN=LDB3 PE=4 SV=2	1	18	18	18	65.7	31.17	283	323.31	0.813267	0.909592	0.894967	1.09651	1.11876	1.03538	1.24173	0.00564962
A0A1D5PDI2	A0A1D5PDI2	tr|A0A1D5PDI2|A0A1D5PDI2_CHICK Uncharacterized protein OS=Gallus gallus OX=9031 GN=DHRS7C PE=3 SV=1	1	3	3	3	10.6	34.376	311	27.532	0.773846	0.833873	0.902833	1.10929	1.06447	1.03178	1.27682	0.00598979
A0A1D5PDT3;A0A1D5PU07;E1C784;A0A1D5PJX0;A0A3Q2TVE8;Q98SH2;A0A1D5PFN0;A0A1D5PXJ7	A0A1D5PDT3;A0A1D5PU07;E1C784;A0A1D5PJX0;A0A3Q2TVE8	tr|A0A1D5PDT3|A0A1D5PDT3_CHICK Calcium-transporting ATPase OS=Gallus gallus OX=9031 GN=ATP2B4 PE=3 SV=2;tr|A0A1D5PU07|A0A1D5PU07_CHICK Calcium-transporting ATPase OS=Gallus gallus OX=9031 GN=ATP2B4 PE=3 SV=2;tr|E1C784|E1C784_CHICK Calcium-transporting ATPa	8	6	6	6	7.1	124.08	1125	13.271	0.696714	0.815824	0.806636	1.05896	1.11269	1.13318	1.425	0.00174934
A0A1D5PGJ1	A0A1D5PGJ1	tr|A0A1D5PGJ1|A0A1D5PGJ1_CHICK Uncharacterized protein OS=Gallus gallus OX=9031 GN=PITPNA PE=4 SV=2	1	3	3	1	17.1	30.112	257	78.621	0.788376	0.885945	1.02163	1.12027	1.13912	1.13749	1.26	0.0262701
A0A1D5PHE2	A0A1D5PHE2	tr|A0A1D5PHE2|A0A1D5PHE2_CHICK Inositol-1-monophosphatase OS=Gallus gallus OX=9031 GN=IMPA1 PE=3 SV=1	1	2	2	2	10.4	30.142	278	11.608	0.797719	0.822593	0.916083	1.12639	1.10044	1.13268	1.32452	0.00183025
A0A1D5PI89;A0A1D5P9R7;A0A1D5PXK5;A0A3Q2U0I3	A0A1D5PI89;A0A1D5P9R7;A0A1D5PXK5;A0A3Q2U0I3	tr|A0A1D5PI89|A0A1D5PI89_CHICK Calcium-transporting ATPase OS=Gallus gallus OX=9031 GN=ATP2B2 PE=3 SV=2;tr|A0A1D5P9R7|A0A1D5P9R7_CHICK Calcium-transporting ATPase OS=Gallus gallus OX=9031 GN=ATP2B2 PE=3 SV=2;tr|A0A1D5PXK5|A0A1D5PXK5_CHICK Calcium-transport	4	1	1	1	0.7	132.98	1212	4.0947	0.73522	0.76371	0.926537	1.06633	1.17876	1.19619	1.41881	0.00936243
A0A1D5PSH6	A0A1D5PSH6	tr|A0A1D5PSH6|A0A1D5PSH6_CHICK Alpha-enolase OS=Gallus gallus OX=9031 GN=ENO1 PE=3 SV=2	1	20	1	1	59	47.441	434	61.199	0.7428	0.724821	0.765657	1.09464	1.51639	1.03744	1.63368	0.0357302
A0A1D5PU60;E1C136	A0A1D5PU60;E1C136	tr|A0A1D5PU60|A0A1D5PU60_CHICK Chloride intracellular channel protein OS=Gallus gallus OX=9031 GN=CLIC5 PE=3 SV=1;tr|E1C136|E1C136_CHICK Chloride intracellular channel protein OS=Gallus gallus OX=9031 GN=CLIC5 PE=3 SV=3	2	4	4	4	16.2	43.816	389	44.439	0.755893	0.857722	0.89596	1.09959	1.05226	1.22841	1.34695	0.0124653
A0A1D5PUM7;A0A1D5PVC1	A0A1D5PUM7	tr|A0A1D5PUM7|A0A1D5PUM7_CHICK Uncharacterized protein OS=Gallus gallus OX=9031 GN=IGFN1 PE=4 SV=2	2	88	88	15	55.5	233.15	2363	323.31	0.871562	0.923713	0.836829	1.11329	0.995982	1.08533	1.21371	0.0125052
A0A1D5PW21;A0A1D5P1Q3	A0A1D5PW21;A0A1D5P1Q3	tr|A0A1D5PW21|A0A1D5PW21_CHICK WD_REPEATS_REGION domain-containing protein OS=Gallus gallus OX=9031 GN=EDC4 PE=4 SV=1;tr|A0A1D5P1Q3|A0A1D5P1Q3_CHICK WD_REPEATS_REGION domain-containing protein OS=Gallus gallus OX=9031 GN=EDC4 PE=4 SV=1	2	3	3	3	2.4	148.95	1352	3.2164	0.594172	0.634869	1.00017	1.21202	1.20462	1.0868	1.57161	0.0348788
A0A1L1RIW5	A0A1L1RIW5	tr|A0A1L1RIW5|A0A1L1RIW5_CHICK IF rod domain-containing protein OS=Gallus gallus OX=9031 GN=KRT8 PE=3 SV=2	1	4	1	1	5	60.513	541	12.053	0.630764	0.854613	0.741313	1.03778	1.16707	1.04286	1.45854	0.0116245
A0A1L1RJP8;F1NW97;P09644	A0A1L1RJP8;F1NW97;P09644	tr|A0A1L1RJP8|A0A1L1RJP8_CHICK Tubulin alpha chain OS=Gallus gallus OX=9031 GN=TUBA4A PE=3 SV=2;tr|F1NW97|F1NW97_CHICK Tubulin alpha chain OS=Gallus gallus OX=9031 GN=TUBA4B PE=3 SV=4;sp|P09644|TBA5_CHICK Tubulin alpha-5 chain OS=Gallus gallus OX=9031 PE=3	3	13	3	3	34.7	55.274	499	117.95	0.745064	0.858852	0.73365	1.26487	1.48084	0.985734	1.59629	0.0354281
A0A1L1RQQ0;A0A1L1RKH8;A0A1L1RNS0;P51913;F1NZ78;Q5ZIQ4	A0A1L1RQQ0;A0A1L1RKH8;A0A1L1RNS0;P51913;F1NZ78	tr|A0A1L1RQQ0|A0A1L1RQQ0_CHICK Alpha-enolase OS=Gallus gallus OX=9031 GN=ENO1 PE=3 SV=1;tr|A0A1L1RKH8|A0A1L1RKH8_CHICK Alpha-enolase OS=Gallus gallus OX=9031 GN=ENO1 PE=3 SV=2;tr|A0A1L1RNS0|A0A1L1RNS0_CHICK Alpha-enolase OS=Gallus gallus OX=9031 GN=ENO1 PE	6	22	22	3	59.7	47.332	434	323.31	0.798035	0.879032	0.945347	1.05835	1.05486	1.07802	1.2169	0.0117936
A0A1L1RUE3	A0A1L1RUE3	tr|A0A1L1RUE3|A0A1L1RUE3_CHICK Uncharacterized protein OS=Gallus gallus OX=9031 GN=HINTW PE=4 SV=1	1	1	1	1	9.2	13.922	130	9.4931	0.581923	0.809698	0.947695	1.55375	1.26531	1.05449	1.65585	0.0466301
A0A1L1RXW8;P12620	A0A1L1RXW8;P12620	tr|A0A1L1RXW8|A0A1L1RXW8_CHICK Troponin T, fast skeletal muscle isoforms OS=Gallus gallus OX=9031 GN=TNNT3 PE=4 SV=2;sp|P12620|TNNT3_CHICK Troponin T, fast skeletal muscle isoforms OS=Gallus gallus OX=9031 GN=TNNT3 PE=1 SV=3	2	21	21	2	49.1	26.141	220	197.08	0.6433	0.700824	0.880652	1.16765	1.22338	1.09874	1.5686	0.00622535
A0A1L1RZK1	A0A1L1RZK1	tr|A0A1L1RZK1|A0A1L1RZK1_CHICK Lactoylglutathione lyase OS=Gallus gallus OX=9031 GN=GLO1 PE=3 SV=2	1	11	11	11	58.9	20.553	180	116.03	0.777847	0.921289	0.758545	1.20621	1.42173	1.1091	1.52056	0.0156668
A0A1L1S091	A0A1L1S091	tr|A0A1L1S091|A0A1L1S091_CHICK Uncharacterized protein OS=Gallus gallus OX=9031 GN=PEBP1 PE=4 SV=2	1	8	8	8	57.3	20.729	185	229.37	0.800309	0.862885	0.989797	1.11269	1.14143	1.11825	1.27116	0.0131665
A0A3Q2TY77	A0A3Q2TY77	tr|A0A3Q2TY77|A0A3Q2TY77_CHICK Uncharacterized protein OS=Gallus gallus OX=9031 GN=RAB15 PE=4 SV=1	1	1	1	1	5.2	24.177	211	7.0401	0.704612	0.801543	0.708711	1.02411	1.14536	0.969211	1.4171	0.00720153
A0A3Q2U481	A0A3Q2U481	tr|A0A3Q2U481|A0A3Q2U481_CHICK LIM domain binding 3 OS=Gallus gallus OX=9031 PE=4 SV=1	1	7	7	7	32.4	30.012	262	81.753	0.731441	0.815383	0.958784	1.05314	1.15417	1.0156	1.28628	0.037768
A0A3Q2U6J9;A0A1D5PFJ2;A0A1D5PFM3;E1C5E0;A4ZZ64;A0A1D5PL09;F1NB94;B6V3I0	A0A3Q2U6J9;A0A1D5PFJ2;A0A1D5PFM3;E1C5E0;A4ZZ64;A0A1D5PL09;F1NB94;B6V3I0	tr|A0A3Q2U6J9|A0A3Q2U6J9_CHICK Uncharacterized protein OS=Gallus gallus OX=9031 GN=CAST PE=4 SV=1;tr|A0A1D5PFJ2|A0A1D5PFJ2_CHICK Uncharacterized protein OS=Gallus gallus OX=9031 GN=CAST PE=4 SV=2;tr|A0A1D5PFM3|A0A1D5PFM3_CHICK Uncharacterized protein OS=Ga	8	4	4	4	7.7	81.202	768	2.2803	0.793476	0.757524	0.934622	1.11166	1.20645	1.04973	1.35493	0.0141481
A0A3Q2U766;F1NPA2;A0A3Q2U9E9	A0A3Q2U766;F1NPA2;A0A3Q2U9E9	tr|A0A3Q2U766|A0A3Q2U766_CHICK Uncharacterized protein OS=Gallus gallus OX=9031 GN=PSMD11 PE=4 SV=1;tr|F1NPA2|F1NPA2_CHICK PCI domain-containing protein OS=Gallus gallus OX=9031 GN=PSMD11 PE=4 SV=3;tr|A0A3Q2U9E9|A0A3Q2U9E9_CHICK PCI domain-containing prote	3	9	9	9	24.2	44.839	400	27.59	0.689053	0.773346	0.917591	1.09959	1.00819	1.023	1.31546	0.0259959
A0A3Q2UBH5;F1NH35	A0A3Q2UBH5;F1NH35	tr|A0A3Q2UBH5|A0A3Q2UBH5_CHICK Uncharacterized protein OS=Gallus gallus OX=9031 GN=DHRS7B PE=3 SV=1;tr|F1NH35|F1NH35_CHICK Uncharacterized protein OS=Gallus gallus OX=9031 GN=DHRS7B PE=3 SV=5	2	9	9	9	33.7	33.823	309	79.052	0.744849	0.877557	0.889917	1.13754	1.2237	1.14606	1.39604	0.00354364
A0A3Q2UDT6;A0A1D5PKA9;Q5F3J3	A0A3Q2UDT6;A0A1D5PKA9	tr|A0A3Q2UDT6|A0A3Q2UDT6_CHICK Uncharacterized protein OS=Gallus gallus OX=9031 GN=NPEPPS PE=4 SV=1;tr|A0A1D5PKA9|A0A1D5PKA9_CHICK Uncharacterized protein OS=Gallus gallus OX=9031 GN=NPEPPS PE=4 SV=2	3	19	19	19	18.8	124.22	1113	134.67	0.787037	0.88692	0.922383	1.07193	1.1265	1.04281	1.24838	0.0105099
A0A3Q2UFV6;E1C8N1	A0A3Q2UFV6;E1C8N1	tr|A0A3Q2UFV6|A0A3Q2UFV6_CHICK Uncharacterized protein OS=Gallus gallus OX=9031 GN=COMP PE=4 SV=1;tr|E1C8N1|E1C8N1_CHICK Uncharacterized protein OS=Gallus gallus OX=9031 GN=COMP PE=4 SV=2	2	4	4	4	11	83.381	761	14.025	0.922392	0.606913	0.738705	1.7109	1.59453	1.39066	2.07057	0.00347398
A0A3Q3AHU9	A0A3Q3AHU9	tr|A0A3Q3AHU9|A0A3Q3AHU9_CHICK Uncharacterized protein OS=Gallus gallus OX=9031 GN=LOC424401 PE=4 SV=1	1	8	8	8	64.3	13.06	115	50.578	0.810698	0.82562	0.908731	1.15367	1.29563	1.13253	1.40737	0.00439954
A0A3S5ZPU4;Q7ZZH5;O57559	A0A3S5ZPU4;Q7ZZH5;O57559	tr|A0A3S5ZPU4|A0A3S5ZPU4_CHICK Troponin T, fast skeletal muscle isoforms OS=Gallus gallus OX=9031 GN=TNNT3 PE=4 SV=1;tr|Q7ZZH5|Q7ZZH5_CHICK Fast skeletal muscle troponin T isoform OS=Gallus gallus OX=9031 PE=4 SV=1;tr|O57559|O57559_CHICK Troponin T variant	3	21	2	2	47.9	25.592	215	2.1048	0.739638	1.01011	0.746617	1.12023	1.33752	1.082	1.41797	0.0435462
A1IMF0	A1IMF0	tr|A1IMF0|A1IMF0_CHICK Ubiquitin carboxyl-terminal hydrolase OS=Gallus gallus OX=9031 GN=UCH-L1 PE=2 SV=1	1	2	2	2	14.7	25.11	224	39.087	0.720054	0.765858	0.796791	1.09856	0.957745	1.05195	1.36165	0.00425726
D0VX27;F1NC51	D0VX27;F1NC51	tr|D0VX27|D0VX27_CHICK Mitochondrial ubiquinol-cytochrome c reductase 7.2 kda protein OS=Gallus gallus OX=9031 PE=1 SV=1;tr|F1NC51|F1NC51_CHICK Uncharacterized protein OS=Gallus gallus OX=9031 GN=UQCR10 PE=1 SV=2	2	1	1	1	27.9	6.9949	61	12.888	0.754735	0.918355	0.68603	1.19671	1.15459	1.09205	1.45959	0.00865702
D0VX30;A0A1D5P7X9;A0A3Q2UJ64	D0VX30;A0A1D5P7X9;A0A3Q2UJ64	tr|D0VX30|D0VX30_CHICK Cytochrome b-c1 complex subunit 7 OS=Gallus gallus OX=9031 PE=1 SV=1;tr|A0A1D5P7X9|A0A1D5P7X9_CHICK Cytochrome b-c1 complex subunit 7 OS=Gallus gallus OX=9031 GN=UQCRB PE=3 SV=1;tr|A0A3Q2UJ64|A0A3Q2UJ64_CHICK Cytochrome b-c1 complex	3	7	7	6	56.4	13.368	110	64.436	0.703362	0.774637	0.956791	1.08261	1.14202	1.0206	1.33286	0.0314684
E1BU93	E1BU93	tr|E1BU93|E1BU93_CHICK Uncharacterized protein OS=Gallus gallus OX=9031 GN=MYOZ1 PE=4 SV=3	1	12	12	12	53.6	30.905	278	250.97	0.779213	0.859531	0.905052	0.992689	1.07567	1.01758	1.21312	0.0150459
E1BVU4	E1BVU4	tr|E1BVU4|E1BVU4_CHICK SH3 domain-binding glutamic acid-rich-like protein OS=Gallus gallus OX=9031 PE=3 SV=4	1	5	5	5	42	12.557	112	63.328	0.68719	0.780866	0.846439	1.10527	1.18842	1.09734	1.46513	0.00277862
E1BXC2	E1BXC2	tr|E1BXC2|E1BXC2_CHICK S-formylglutathione hydrolase OS=Gallus gallus OX=9031 GN=ESD PE=3 SV=3	1	4	4	4	22.3	31.559	282	57.529	0.852614	0.881749	1.01862	1.11176	1.22225	1.06723	1.23548	0.0349215
E1BXG9;A0A3Q2TYE1;A0A3Q2UMI4;A0A3Q2UM37	E1BXG9	tr|E1BXG9|E1BXG9_CHICK Uncharacterized protein OS=Gallus gallus OX=9031 GN=PPID PE=4 SV=2	4	10	10	9	24.9	40.478	370	48.158	0.72144	0.862963	0.943701	1.09596	1.02442	1.00606	1.23667	0.0474087
E1C6A3	E1C6A3	tr|E1C6A3|E1C6A3_CHICK WH2 domain-containing protein OS=Gallus gallus OX=9031 GN=LMOD3 PE=4 SV=4	1	2	2	2	3.6	59.636	524	3.3655	0.755099	0.677952	0.841321	1.09758	1.11252	1.03326	1.42605	0.00368722
E1C7I7	E1C7I7	tr|E1C7I7|E1C7I7_CHICK Uncharacterized protein OS=Gallus gallus OX=9031 GN=IGFN1 PE=4 SV=4	1	76	3	3	56.8	190.75	1981	4.9751	0.796879	0.751318	0.859734	1.09249	0.92486	1.09105	1.2909	0.0216971
E1C846;A0A1D5PTL0	E1C846;A0A1D5PTL0	tr|E1C846|E1C846_CHICK Ig-like domain-containing protein OS=Gallus gallus OX=9031 GN=CILP PE=4 SV=4;tr|A0A1D5PTL0|A0A1D5PTL0_CHICK Ig-like domain-containing protein OS=Gallus gallus OX=9031 GN=CILP PE=4 SV=2	2	2	2	2	2	120.74	1076	6.9688		0.84527	0.791567		1.13887	1.12361	1.38223	0.00786902
E1C968	E1C968	tr|E1C968|E1C968_CHICK Apelin receptor 1 OS=Gallus gallus OX=9031 GN=APLNR PE=2 SV=2	1	1	1	1	2.2	40.486	370	-2	0.729091	0.655981	0.73144	1.46153	1.2441	0.908543	1.70761	0.0373804
F1N903;A0A3Q3ACV0	F1N903;A0A3Q3ACV0	tr|F1N903|F1N903_CHICK PCI domain-containing protein OS=Gallus gallus OX=9031 GN=PSMD6 PE=4 SV=2;tr|A0A3Q3ACV0|A0A3Q3ACV0_CHICK PCI domain-containing protein OS=Gallus gallus OX=9031 GN=PSMD6 PE=4 SV=1	2	4	4	4	8.7	45.577	389	5.624	0.787096	0.698821	0.930107	1.06599	1.11333	0.969269	1.30321	0.0373945
F1N9Z6;A0A1D5PSF9;Q90724	F1N9Z6;A0A1D5PSF9;Q90724	tr|F1N9Z6|F1N9Z6_CHICK Uncharacterized protein OS=Gallus gallus OX=9031 GN=MYOM1 PE=4 SV=4;tr|A0A1D5PSF9|A0A1D5PSF9_CHICK Uncharacterized protein OS=Gallus gallus OX=9031 GN=MYOM1 PE=4 SV=1;tr|Q90724|Q90724_CHICK Myomesin OS=Gallus gallus OX=9031 PE=2 SV=1	3	77	77	77	53.9	177.33	1587	323.31	0.807408	0.872129	0.918288	1.08228	1.14825	1.1194	1.28952	0.00257683
F1NBV0;Q5ZJF4	F1NBV0;Q5ZJF4	tr|F1NBV0|F1NBV0_CHICK Peroxiredoxin-6 OS=Gallus gallus OX=9031 GN=PRDX6 PE=4 SV=1;sp|Q5ZJF4|PRDX6_CHICK Peroxiredoxin-6 OS=Gallus gallus OX=9031 GN=PRDX6 PE=2 SV=3	2	14	14	14	59.4	25.076	224	166.75	0.799545	0.820658	0.986645	1.07684	1.14138	1.06962	1.26123	0.0231693
F1NHA9;Q9PU47;A0A3Q2UH56	F1NHA9;Q9PU47;A0A3Q2UH56	tr|F1NHA9|F1NHA9_CHICK PDZ and LIM domain protein 3 OS=Gallus gallus OX=9031 GN=PDLIM3 PE=4 SV=2;sp|Q9PU47|PDLI3_CHICK PDZ and LIM domain protein 3 OS=Gallus gallus OX=9031 GN=PDLIM3 PE=1 SV=1;tr|A0A3Q2UH56|A0A3Q2UH56_CHICK PDZ and LIM domain protein 3 OS=	3	14	14	14	53.4	39.565	363	288.88	0.737538	0.862648	0.901826	1.09909	1.15833	1.02827	1.31322	0.0136925
F1NIJ6;Q5ZMU3;A0A1L1RQ91;A0A1L1RPE8;A0A1D5PRS4	F1NIJ6;Q5ZMU3;A0A1L1RQ91;A0A1L1RPE8;A0A1D5PRS4	tr|F1NIJ6|F1NIJ6_CHICK Glucose-6-phosphate isomerase OS=Gallus gallus OX=9031 GN=GPI PE=3 SV=2;tr|Q5ZMU3|Q5ZMU3_CHICK Glucose-6-phosphate isomerase OS=Gallus gallus OX=9031 GN=RCJMB04_1c14 PE=2 SV=1;tr|A0A1L1RQ91|A0A1L1RQ91_CHICK Glucose-6-phosphate isomer	5	24	24	24	42.5	59.226	525	323.31	0.743235	0.812352	0.949667	1.11749	1.17704	1.10946	1.35874	0.00959726
F1NN63;Q2UZR2	F1NN63;Q2UZR2	tr|F1NN63|F1NN63_CHICK Uncharacterized protein OS=Gallus gallus OX=9031 GN=PGM1 PE=3 SV=2;tr|Q2UZR2|Q2UZR2_CHICK Phosphoglucomutase 1 OS=Gallus gallus OX=9031 PE=2 SV=1	2	30	30	29	52.5	61.548	562	323.31	0.86229	0.937748	0.945581	1.10016	1.12248	1.11832	1.21683	0.00193547
F1NSC1	F1NSC1	tr|F1NSC1|F1NSC1_CHICK Uncharacterized protein OS=Gallus gallus OX=9031 GN=ATP5F1 PE=4 SV=3	1	8	8	8	15.5	51.109	465	37.743	0.684608	0.731372	0.902436	1.08731	1.01647	0.972677	1.32697	0.0270879
F1NSZ4	F1NSZ4	tr|F1NSZ4|F1NSZ4_CHICK CYTOSOL_AP domain-containing protein OS=Gallus gallus OX=9031 GN=NPEPL1 PE=4 SV=2	1	8	8	8	18.7	56.089	523	156.91	0.832633	0.920802	0.881708	1.0551	1.21745	1.14435	1.29666	0.00817531
F1NU17;P51903	F1NU17;P51903	tr|F1NU17|F1NU17_CHICK Phosphoglycerate kinase OS=Gallus gallus OX=9031 GN=PGK1 PE=3 SV=1;sp|P51903|PGK_CHICK Phosphoglycerate kinase OS=Gallus gallus OX=9031 GN=PGK PE=2 SV=2	2	30	30	30	70	44.666	417	323.31	0.836196	0.918141	0.917919	1.09007	1.14773	1.10753	1.25187	0.00222544
F1NVD4;Q5ZJL5;A0A1D5PL45	F1NVD4	tr|F1NVD4|F1NVD4_CHICK Adenylosuccinate synthetase isozyme 1 OS=Gallus gallus OX=9031 GN=ADSSL1 PE=3 SV=4	3	17	17	17	38.8	50.097	456	195.94	0.84894	0.932544	0.834987	1.03387	1.23524	1.0831	1.28119	0.0224488
F1NYI3	F1NYI3	tr|F1NYI3|F1NYI3_CHICK tRNA-splicing ligase RtcB homolog OS=Gallus gallus OX=9031 GN=RTCB PE=3 SV=2	1	10	10	10	20.8	55.242	505	54.581	0.802989	0.890151	0.781106	1.02696	1.04463	1.05239	1.2626	0.00316434
F1P2E9	F1P2E9	tr|F1P2E9|F1P2E9_CHICK Uncharacterized protein OS=Gallus gallus OX=9031 GN=MYPN PE=4 SV=5	1	19	19	14	23.4	109.52	991	97.112	0.791855	0.842679	0.985758	1.14645	1.04596	1.03539	1.23185	0.0407937
F1P3P3;Q5ZMT1	F1P3P3;Q5ZMT1	tr|F1P3P3|F1P3P3_CHICK Uncharacterized protein OS=Gallus gallus OX=9031 GN=ARHGDIA PE=4 SV=1;tr|Q5ZMT1|Q5ZMT1_CHICK Uncharacterized protein OS=Gallus gallus OX=9031 GN=RCJMB04_1d23 PE=2 SV=1	2	5	5	5	34.8	23.262	204	82.02	0.729791	0.737464	0.925737	1.11561	1.19427	1.04548	1.40216	0.0141687
F1P593;Q00649;Q90784;E1C1Q2	F1P593;Q00649	tr|F1P593|F1P593_CHICK Heat shock protein beta-1 OS=Gallus gallus OX=9031 GN=HSPB1 PE=3 SV=2;sp|Q00649|HSPB1_CHICK Heat shock protein beta-1 OS=Gallus gallus OX=9031 GN=HSPB1 PE=2 SV=1	4	13	13	13	66.5	21.826	194	323.31	0.633126	0.707034	0.818311	0.858486	1.05851	0.97061	1.3378	0.0371106
F1P5R7;A0A1L1RPT1	F1P5R7;A0A1L1RPT1	tr|F1P5R7|F1P5R7_CHICK Uncharacterized protein OS=Gallus gallus OX=9031 GN=SMYD1 PE=4 SV=4;tr|A0A1L1RPT1|A0A1L1RPT1_CHICK Uncharacterized protein OS=Gallus gallus OX=9031 GN=SMYD1 PE=4 SV=1	2	13	13	3	33.9	54.812	478	148.82	0.782929	0.817596	0.830463	1.19051	1.18493	1.24572	1.48958	7.89493e-05
H9L3K0;H9L074	H9L3K0;H9L074	tr|H9L3K0|H9L3K0_CHICK Tropomyosin 3 alpha isoform OS=Gallus gallus OX=9031 GN=TPM3 PE=2 SV=3;tr|H9L074|H9L074_CHICK Uncharacterized protein OS=Gallus gallus OX=9031 GN=TPM3 PE=3 SV=3	2	31	9	4	66.9	32.818	284	86.129	0.669271	0.790431	0.797962	1.14409	1.1164	1.01439	1.45057	0.00410894
P00340;E1BTT8;A0A1D5NZ01	P00340;E1BTT8;A0A1D5NZ01	sp|P00340|LDHA_CHICK L-lactate dehydrogenase A chain OS=Gallus gallus OX=9031 GN=LDHA PE=1 SV=3;tr|E1BTT8|E1BTT8_CHICK L-lactate dehydrogenase OS=Gallus gallus OX=9031 GN=LDHA PE=3 SV=2;tr|A0A1D5NZ01|A0A1D5NZ01_CHICK L-lactate dehydrogenase OS=Gallus gallu	3	21	21	21	56.9	36.514	332	323.31	0.74638	0.780203	0.860828	1.13324	1.28395	1.11852	1.48098	0.00366994
P00565;A0A3Q2U6M6;A0A3Q2U807	P00565	sp|P00565|KCRM_CHICK Creatine kinase M-type OS=Gallus gallus OX=9031 GN=CKM PE=2 SV=1	3	30	30	25	68.8	43.328	381	323.31	0.767449	0.911437	0.991776	1.18733	1.17615	1.13328	1.30932	0.0152222
P02588	P02588	sp|P02588|TNNC2_CHICK Troponin C, skeletal muscle OS=Gallus gallus OX=9031 GN=TNNC2 PE=1 SV=3	1	15	15	14	75.5	18.375	163	323.31	0.800753	0.986033	0.810438	1.21643	1.17772	1.12539	1.35511	0.00946952
P02604	P02604	sp|P02604|MLE1_CHICK Myosin light chain 1, skeletal muscle isoform OS=Gallus gallus OX=9031 PE=1 SV=3	1	21	21	7	85.9	20.899	192	323.31	0.783959	0.865472	0.943833	1.06837	1.06393	1.08902	1.24219	0.0110444
P02609;A0A3Q3A970	P02609	sp|P02609|MLRS_CHICK Myosin regulatory light chain 2, skeletal muscle isoform OS=Gallus gallus OX=9031 GN=MYLPF PE=1 SV=2	2	15	15	15	79.2	18.839	168	323.31	0.752068	0.804114	0.966717	1.10396	1.0753	1.07556	1.29011	0.0202285
P04268;F1NM23;A0A1D5P342;A0A1D5NVL7;Q91968;A0A1D5PSX3;A0A1L1RVF2	P04268;F1NM23;A0A1D5P342;A0A1D5NVL7;Q91968;A0A1D5PSX3;A0A1L1RVF2	sp|P04268|TPM1_CHICK Tropomyosin alpha-1 chain OS=Gallus gallus OX=9031 GN=TPM1 PE=1 SV=2;tr|F1NM23|F1NM23_CHICK Tropomyosin alpha-1 chain OS=Gallus gallus OX=9031 GN=TPM1 PE=3 SV=3;tr|A0A1D5P342|A0A1D5P342_CHICK Tropomyosin alpha-1 chain OS=Gallus gallus	7	42	42	0	79.2	32.765	284	323.31	0.727077	0.790057	0.983646	1.12459	1.04995	1.07113	1.29786	0.0365387
P05094;A0A1D5PF13;A0A1D5P9P3;A0A1D5P522;Q5ZIW4;A0A1D5PBQ2;Q5ZJN7;A0A3Q2U986;E1BYX3;A0A1D5PI98	P05094;A0A1D5PF13;A0A1D5P9P3;A0A1D5P522	sp|P05094|ACTN1_CHICK Alpha-actinin-1 OS=Gallus gallus OX=9031 GN=ACTN1 PE=1 SV=3;tr|A0A1D5PF13|A0A1D5PF13_CHICK Alpha-actinin-1 OS=Gallus gallus OX=9031 GN=ACTN1 PE=4 SV=2;tr|A0A1D5P9P3|A0A1D5P9P3_CHICK Alpha-actinin-1 OS=Gallus gallus OX=9031 GN=ACTN1 PE	10	19	4	2	18.9	103.16	893	43.393	0.952229	0.892016	0.912978	1.12318	1.177	1.02595	1.20633	0.0163394
P07322	P07322	sp|P07322|ENOB_CHICK Beta-enolase OS=Gallus gallus OX=9031 GN=ENO3 PE=1 SV=3	1	18	15	13	43.5	47.196	434	323.31	0.827966	0.889953	0.958979	1.0719	1.04175	1.10403	1.20201	0.0126188
P13538	P13538	sp|P13538|MYSS_CHICK Myosin heavy chain, skeletal muscle, adult OS=Gallus gallus OX=9031 PE=1 SV=4	1	190	190	0	69.6	223.14	1939	323.31	0.775048	0.87615	0.955612	1.09359	1.04196	1.09762	1.24028	0.0194387
P13585	P13585	sp|P13585|AT2A1_CHICK Sarcoplasmic/endoplasmic reticulum calcium ATPase 1 OS=Gallus gallus OX=9031 GN=ATP2A1 PE=2 SV=2	1	44	44	27	45.9	109.02	994	323.31	0.86928	0.935455	0.96648	1.12975	1.15185	1.14627	1.23695	0.00174356
P19121	P19121	sp|P19121|ALBU_CHICK Serum albumin OS=Gallus gallus OX=9031 GN=ALB PE=1 SV=2	1	38	2	2	63.7	69.918	615	4.7249	0.552782	0.652524	0.912926	1.13567	1.33636	1.04132	1.65862	0.0281624
P28497;A0M8U0	P28497;A0M8U0	sp|P28497|CAZA2_CHICK F-actin-capping protein subunit alpha-2 OS=Gallus gallus OX=9031 GN=CAPZA2 PE=1 SV=1;tr|A0M8U0|A0M8U0_CHICK F-actin-capping protein subunit alpha OS=Gallus gallus OX=9031 GN=CAPZA2 PE=3 SV=1	2	11	11	11	59.1	32.844	286	170.59	0.780697	0.874761	0.934525	1.09915	1.036	1.07048	1.2377	0.0132194
P43347;Q6TXK8	P43347	sp|P43347|TCTP_CHICK Translationally-controlled tumor protein homolog OS=Gallus gallus OX=9031 GN=TPT1 PE=2 SV=1	2	4	4	4	24.4	19.53	172	118.23	0.777393	0.909581	0.913131	1.03892	1.00576	1.10051	1.20964	0.0259358
P61355;A0A452J7V8;A0A1L1RRZ8	P61355;A0A452J7V8	sp|P61355|RL27_CHICK 60S ribosomal protein L27 OS=Gallus gallus OX=9031 GN=RPL27 PE=2 SV=2;tr|A0A452J7V8|A0A452J7V8_CHICK 60S ribosomal protein L27 OS=Gallus gallus OX=9031 GN=RPL27 PE=3 SV=1	3	3	3	3	28.7	15.798	136	4.697	0.715885	0.631689	0.947169	1.00329	1.06672	1.06938	1.36808	0.043683
P87362	P87362	sp|P87362|BLMH_CHICK Bleomycin hydrolase OS=Gallus gallus OX=9031 GN=BLMH PE=1 SV=1	1	5	5	4	11	52.69	455	18.332	0.67686	0.752974	0.982213	1.17883	1.11628	1.06773	1.39418	0.031102
Q2QB50;F1NE68;M1ZMR1	Q2QB50;F1NE68;M1ZMR1	tr|Q2QB50|Q2QB50_CHICK Aldehyde oxidase 1 OS=Gallus gallus OX=9031 PE=2 SV=1;tr|F1NE68|F1NE68_CHICK Uncharacterized protein OS=Gallus gallus OX=9031 GN=AOX1 PE=4 SV=2;tr|M1ZMR1|M1ZMR1_CHICK Aldehyde oxidase 1 OS=Gallus gallus OX=9031 PE=2 SV=1	3	4	4	4	2.7	146.37	1328	3.0809	0.691118	0.666696	0.914758	1.30006	1.37301	1.08636	1.65426	0.0132058
Q5F3M8;F1N9Z7;Q5F365;Q5ZHL9	Q5F3M8;F1N9Z7	tr|Q5F3M8|Q5F3M8_CHICK Succinyl-CoA:3-ketoacid-coenzyme A transferase OS=Gallus gallus OX=9031 GN=RCJMB04_12o19 PE=2 SV=1;tr|F1N9Z7|F1N9Z7_CHICK Succinyl-CoA:3-ketoacid-coenzyme A transferase OS=Gallus gallus OX=9031 GN=OXCT1 PE=3 SV=2	4	10	10	10	24.6	56.185	517	77.335	0.825233	0.734878	0.963147	1.04341	1.10667	1.07948	1.27992	0.0267958
Q5F3W6;F1NMY1;A0A3Q2U4C6	Q5F3W6;F1NMY1;A0A3Q2U4C6	sp|Q5F3W6|1433G_CHICK 14-3-3 protein gamma OS=Gallus gallus OX=9031 GN=YWHAG PE=1 SV=1;tr|F1NMY1|F1NMY1_CHICK 14-3-3 protein gamma OS=Gallus gallus OX=9031 GN=YWHAG PE=3 SV=3;tr|A0A3Q2U4C6|A0A3Q2U4C6_CHICK 14-3-3 protein gamma OS=Gallus gallus OX=9031 GN=Y	3	15	15	8	60.7	28.23	247	254.89	0.736009	0.7882	0.993192	1.07854	1.10842	1.04198	1.28264	0.0425947
Q5F3Z3;A0A1L1RZV0	Q5F3Z3;A0A1L1RZV0	sp|Q5F3Z3|UB2V2_CHICK Ubiquitin-conjugating enzyme E2 variant 2 OS=Gallus gallus OX=9031 GN=UBE2V2 PE=2 SV=1;tr|A0A1L1RZV0|A0A1L1RZV0_CHICK Ubiquitin-conjugating enzyme E2 variant 2 OS=Gallus gallus OX=9031 GN=UBE2V2 PE=4 SV=2	2	7	7	4	50	16.305	144	29.224	0.795699	0.86929	0.954382	1.08824	1.02095	1.04049	1.20245	0.0241373
Q5ZHP2	Q5ZHP2	tr|Q5ZHP2|Q5ZHP2_CHICK Macro domain-containing protein OS=Gallus gallus OX=9031 GN=OARD1 PE=2 SV=1	1	5	5	5	31.7	20.906	189	33.855	0.722771	0.728656	0.834391	1.00544	1.36267	1.13509	1.53258	0.0213646
Q5ZI00;A0A1D5P5L8	Q5ZI00;A0A1D5P5L8	tr|Q5ZI00|Q5ZI00_CHICK Epimerase domain-containing protein OS=Gallus gallus OX=9031 GN=NDUFA9 PE=2 SV=1;tr|A0A1D5P5L8|A0A1D5P5L8_CHICK Epimerase domain-containing protein OS=Gallus gallus OX=9031 GN=NDUFA9 PE=4 SV=2	2	3	3	3	9.3	43.079	378	3.6584		0.822379	0.919188		1.08388	1.07788	1.24127	0.0493723
Q5ZI39;A0A1D5PE96	Q5ZI39;A0A1D5PE96	tr|Q5ZI39|Q5ZI39_CHICK Uncharacterized protein OS=Gallus gallus OX=9031 GN=PLS3 PE=2 SV=1;tr|A0A1D5PE96|A0A1D5PE96_CHICK Uncharacterized protein OS=Gallus gallus OX=9031 GN=PLS3 PE=4 SV=2	2	1	1	1	1.4	70.823	628	1.7138	1.00905	0.93316	0.965287	1.19255	1.23585	1.12474	1.22206	0.00531544
Q5ZIQ5;F1NPM6	Q5ZIQ5;F1NPM6	tr|Q5ZIQ5|Q5ZIQ5_CHICK NADH dehydrogenase [ubiquinone] 1 alpha subcomplex subunit 10, mitochondrial OS=Gallus gallus OX=9031 GN=RCJMB04_24e8 PE=2 SV=1;tr|F1NPM6|F1NPM6_CHICK NADH dehydrogenase [ubiquinone] 1 alpha subcomplex subunit 10, mitochondrial OS=Ga	2	6	6	6	16.9	41.431	361	18.784	0.851536	0.943403	0.900822	0.991472	1.1806	1.09969	1.21367	0.0343866
Q5ZJ38;A0A3Q2TU27	Q5ZJ38;A0A3Q2TU27	tr|Q5ZJ38|Q5ZJ38_CHICK RanBD1 domain-containing protein OS=Gallus gallus OX=9031 GN=RANBP1 PE=2 SV=1;tr|A0A3Q2TU27|A0A3Q2TU27_CHICK RanBD1 domain-containing protein OS=Gallus gallus OX=9031 GN=RANBP1 PE=4 SV=1	2	2	2	2	10.6	24.171	208	8.703	0.768555	0.749195		1.00681	1.05375		1.35764	0.00863848
Q5ZK08;A0A1D5PBC6;A0A1L1RYR6;A0A3Q2U945	Q5ZK08;A0A1D5PBC6	tr|Q5ZK08|Q5ZK08_CHICK AA_TRNA_LIGASE_II domain-containing protein OS=Gallus gallus OX=9031 GN=RCJMB04_13p14 PE=2 SV=1;tr|A0A1D5PBC6|A0A1D5PBC6_CHICK AA_TRNA_LIGASE_II domain-containing protein OS=Gallus gallus OX=9031 GN=NARS PE=4 SV=1	4	3	3	3	6.8	64.099	559	11.182	0.920224	0.722283	0.884284	1.09752	1.19488	1.02405	1.31252	0.0284288
Q5ZK18;F1P156	Q5ZK18;F1P156	tr|Q5ZK18|Q5ZK18_CHICK 3HCDH_N domain-containing protein OS=Gallus gallus OX=9031 GN=RCJMB04_13l16 PE=2 SV=1;tr|F1P156|F1P156_CHICK Uncharacterized protein OS=Gallus gallus OX=9031 GN=CRYL1 PE=4 SV=2	2	7	7	7	31.7	31.26	281	44.931	0.782545	0.830794	0.974868	1.00396	1.13274	1.07508	1.24093	0.0390077
Q5ZKG5	Q5ZKG5	sp|Q5ZKG5|PPAC_CHICK Low molecular weight phosphotyrosine protein phosphatase OS=Gallus gallus OX=9031 GN=ACP1 PE=2 SV=3	1	8	8	1	57.6	18.196	158	46	0.784989	0.952281	0.879084	1.0912	1.11795	1.10566	1.26696	0.00898152
Q5ZL83	Q5ZL83	tr|Q5ZL83|Q5ZL83_CHICK Succinate--CoA ligase [ADP/GDP-forming] subunit alpha, mitochondrial OS=Gallus gallus OX=9031 GN=SUCLG1 PE=2 SV=1	1	4	4	4	16.3	34.849	331	21.005	0.837079	0.733886	0.947687	1.18265	1.35648	0.99653	1.40379	0.0485916
Q5ZLF7	Q5ZLF7	tr|Q5ZLF7|Q5ZLF7_CHICK Importin subunit alpha OS=Gallus gallus OX=9031 GN=KPNA4 PE=2 SV=1	1	3	3	2	7.3	57.854	521	37.955	0.848662	0.861482	0.922858	1.14295	1.01679	1.07354	1.22798	0.00969364
Q5ZME2;A0A452J7S4;A0A1D5PE17	Q5ZME2;A0A452J7S4;A0A1D5PE17	sp|Q5ZME2|MDHC_CHICK Malate dehydrogenase, cytoplasmic OS=Gallus gallus OX=9031 GN=MDH1 PE=2 SV=1;tr|A0A452J7S4|A0A452J7S4_CHICK Malate dehydrogenase, cytoplasmic OS=Gallus gallus OX=9031 GN=MDH1 PE=3 SV=1;tr|A0A1D5PE17|A0A1D5PE17_CHICK Malate dehydrogenas	3	16	16	16	41.3	36.543	334	227.19	0.80533	0.893213	0.953113	1.12491	1.14408	1.04438	1.24954	0.013836
Q5ZMF5;A0A1D5PF08	Q5ZMF5;A0A1D5PF08	tr|Q5ZMF5|Q5ZMF5_CHICK Uncharacterized protein OS=Gallus gallus OX=9031 GN=RCJMB04_2d15 PE=2 SV=1;tr|A0A1D5PF08|A0A1D5PF08_CHICK Uncharacterized protein OS=Gallus gallus OX=9031 GN=CANX PE=3 SV=1	2	6	6	6	12.5	68.108	599	23.286	0.632811	0.676885	0.86403	1.06824	1.0409	0.910345	1.38908	0.0305623
Q5ZMQ7	Q5ZMQ7	tr|Q5ZMQ7|Q5ZMQ7_CHICK Uncharacterized protein OS=Gallus gallus OX=9031 GN=SH3KBP1 PE=1 SV=1	1	3	3	3	5.3	81.517	739	29.927	0.854399	0.917412	0.952421	1.1584	1.07078	1.22262	1.26707	0.00990194
Q6EE33;Q5ZK81;F1NI89	Q6EE33;Q5ZK81;F1NI89	tr|Q6EE33|Q6EE33_CHICK S-(hydroxymethyl)glutathione dehydrogenase (Fragment) OS=Gallus gallus OX=9031 PE=2 SV=1;tr|Q5ZK81|Q5ZK81_CHICK S-(hydroxymethyl)glutathione dehydrogenase OS=Gallus gallus OX=9031 GN=RCJMB04_12i19 PE=2 SV=1;tr|F1NI89|F1NI89_CHICK S-(	3	3	3	3	8.9	39.124	371	6.8061	0.761993	0.909969	0.885073	1.03106	1.08996	1.03405	1.23388	0.015869
Q7LZE8	Q7LZE8	tr|Q7LZE8|Q7LZE8_CHICK Fructose-bisphosphate aldolase (Fragment) OS=Gallus gallus OX=9031 PE=1 SV=1	1	2	2	2	100	2.3436	20	19.763	0.796741	0.862242	1.01839	1.08812	1.10955	1.06029	1.21685	0.0451606
Q7SX63;B3VHV2;B6EAX2;P08106;A0A346RQZ3;D6PVB7;A0A4P8GB30;A0A4P8G8N8;M4MBM4;M4MA50;A0A2I4KE16;Q7ZSX8;C0L3J6;A0A4P8GA18;A0A0A0V762;M4MA71;M4MDA2;C3VQ56	Q7SX63;B3VHV2;B6EAX2;P08106;A0A346RQZ3;D6PVB7	tr|Q7SX63|Q7SX63_CHICK Heat shock protein 70 OS=Gallus gallus OX=9031 GN=HSP70 PE=3 SV=1;tr|B3VHV2|B3VHV2_CHICK Heat shock protein 70 OS=Gallus gallus OX=9031 GN=HSP70 PE=2 SV=1;tr|B6EAX2|B6EAX2_CHICK Heat shock protein 70 OS=Gallus gallus OX=9031 GN=HSP70	18	38	38	24	57.9	69.912	634	323.31	0.709867	0.781416	0.911581	0.968373	1.10371	0.976981	1.26893	0.0427627
Q90X55;A0A1D5NYF3;A0A0N7G7I8;Q6VYQ9	Q90X55;A0A1D5NYF3;A0A0N7G7I8	tr|Q90X55|Q90X55_CHICK Adipocyte fatty acid binding protein OS=Gallus gallus OX=9031 GN=AFABP PE=2 SV=2;tr|A0A1D5NYF3|A0A1D5NYF3_CHICK FABP domain-containing protein OS=Gallus gallus OX=9031 GN=FABP4 PE=3 SV=1;tr|A0A0N7G7I8|A0A0N7G7I8_CHICK Adipocyte fatty	4	4	3	3	29.5	14.894	132	8.7196	0.656065	0.679907	0.742816	1.20053	1.25302	0.914696	1.62029	0.0165361
Q91348;A0A1D5PWF8;A0A3Q2U869;A0A1D5NVH6;A0A3Q3A4J9;A0A1D5P252;A0A3Q2UBC8;A0A3Q2U6X6;F1P0K7;A0A3Q2UF77;A0A1D5PCB7;A0A1D5P637;A0A1D5NX95;A0A1D5PKG3;E1BXR3	Q91348;A0A1D5PWF8;A0A3Q2U869	sp|Q91348|F26L_CHICK 6-phosphofructo-2-kinase/fructose-2,6-bisphosphatase OS=Gallus gallus OX=9031 PE=2 SV=2;tr|A0A1D5PWF8|A0A1D5PWF8_CHICK 6PF2K domain-containing protein OS=Gallus gallus OX=9031 GN=PFKFB4 PE=4 SV=2;tr|A0A3Q2U869|A0A3Q2U869_CHICK 6PF2K do	15	9	9	7	21.3	54.403	470	52.612	1.01268	0.866813	0.933217	1.0742	1.37219	1.189	1.29249	0.0467502
Q98932	Q98932	sp|Q98932|RAB5C_CHICK Ras-related protein Rab-5C OS=Gallus gallus OX=9031 GN=RAB5C PE=1 SV=1	1	2	1	1	10.6	23.553	216	2.739	0.456578	0.507366		1.01316	0.899667		1.98438	0.0167408
Q9DEG4	Q9DEG4	tr|Q9DEG4|Q9DEG4_CHICK Nebulin (Fragment) OS=Gallus gallus OX=9031 PE=2 SV=1	1	58	23	23	61	104.69	904	219.28	0.780916	0.842891	0.974715	1.06372	1.09051	1.06995	1.24077	0.022485
Q9I882;A0A3Q2UBM9	Q9I882	tr|Q9I882|Q9I882_CHICK Protein kinase C inhibitor OS=Gallus gallus OX=9031 GN=chPKCI PE=2 SV=1	2	4	4	4	37.3	13.759	126	78.423	0.914712	1.01686	0.918205	1.21207	1.41295	1.10233	1.30795	0.0392243
Q9PSQ1	Q9PSQ1	tr|Q9PSQ1|Q9PSQ1_CHICK M57K=57 kDa nuclear matrix protein (Fragments) OS=Gallus gallus OX=9031 PE=1 SV=1	1	1	1	1	28.6	6.9137	63	6.509	0.786651	0.935515	0.695428	1.31774	1.22155	1.02979	1.4763	0.0250022
Q9W7P7;F1NJF0	Q9W7P7;F1NJF0	tr|Q9W7P7|Q9W7P7_CHICK p32 subunit of splicing factor SF2 (Fragment) OS=Gallus gallus OX=9031 GN=SF2 PE=2 SV=1;tr|F1NJF0|F1NJF0_CHICK Uncharacterized protein OS=Gallus gallus OX=9031 GN=C1QBP PE=4 SV=3	2	2	2	2	9.7	23.683	207	17.911	0.81869	0.706644	0.823804	0.924518	1.02531	0.986385	1.24991	0.015343
R4GGQ4	R4GGQ4	tr|R4GGQ4|R4GGQ4_CHICK zf-Tim10_DDP domain-containing protein OS=Gallus gallus OX=9031 GN=TIMM13 PE=3 SV=2	1	1	1	1	10.9	10.958	101	3.8581		0.813034	0.846692		1.07421	1.01537	1.25899	0.0239762
R4GI80;REV__E1BX08	R4GI80	tr|R4GI80|R4GI80_CHICK Uncharacterized protein OS=Gallus gallus OX=9031 GN=SYNPO PE=4 SV=3	2	14	14	14	17.2	117.82	1146	194.86	0.852574	0.965067	0.973693	1.18311	1.09077	1.17742	1.23643	0.0110181
R4GI86;F1NV80;A0A1L1RL30;A0A3Q3A8S4	R4GI86	tr|R4GI86|R4GI86_CHICK Uncharacterized protein OS=Gallus gallus OX=9031 GN=CAB39 PE=4 SV=1	4	4	4	4	9.1	39.899	341	5.4214	0.807734	0.891693	0.967657	1.06461	1.04145	1.09636	1.20072	0.0217145
R4GJW8;P62149;A0A1D5P2H5;A0A3Q3AZM2;F2Z4K8;O93410;P05419	R4GJW8;P62149;A0A1D5P2H5;A0A3Q3AZM2;F2Z4K8;O93410;P05419	tr|R4GJW8|R4GJW8_CHICK Calmodulin OS=Gallus gallus OX=9031 GN=CALM PE=3 SV=1;sp|P62149|CALM_CHICK Calmodulin OS=Gallus gallus OX=9031 GN=CALM PE=1 SV=2;tr|A0A1D5P2H5|A0A1D5P2H5_CHICK Uncharacterized protein OS=Gallus gallus OX=9031 GN=CALM2 PE=3 SV=2;tr|A0	7	11	10	8	67.8	16.837	149	216.31	0.817573	0.901994	0.843572	1.07969	1.054	1.11466	1.26734	0.0017071
R4GLE6;A0A1D5P2D3;A0A1D5NYX1;P51971	R4GLE6;A0A1D5P2D3;A0A1D5NYX1	tr|R4GLE6|R4GLE6_CHICK Eukaryotic translation initiation factor 1 OS=Gallus gallus OX=9031 GN=EIF1 PE=4 SV=2;tr|A0A1D5P2D3|A0A1D5P2D3_CHICK SUI1 domain-containing protein OS=Gallus gallus OX=9031 GN=EIF1B PE=4 SV=1;tr|A0A1D5NYX1|A0A1D5NYX1_CHICK Eukaryotic	4	3	3	3	41.6	12.733	113	67.147	0.743836	1.01606	0.93499	1.09845	1.1609	1.16273	1.26985	0.0438584
R4GLP0	R4GLP0	tr|R4GLP0|R4GLP0_CHICK Uncharacterized protein OS=Gallus gallus OX=9031 GN=COX7C PE=4 SV=2	1	2	2	2	12.9	15.062	140	5.2939	0.79093	0.884107	0.954246	1.14112	1.20304	1.16533	1.33477	0.00440388
R4GM10;P53449;B4Z858	R4GM10	tr|R4GM10|R4GM10_CHICK Fructose-bisphosphate aldolase OS=Gallus gallus OX=9031 GN=ALDOC PE=3 SV=1	3	11	11	9	33.8	39.36	364	260.11	0.789821	0.821159	0.880865	1.10874	1.22329	1.06995	1.36524	0.00467947
A0A1D5NXR2	A0A1D5NXR2	tr|A0A1D5NXR2|A0A1D5NXR2_CHICK Uncharacterized protein OS=Gallus gallus OX=9031 GN=BCAP31 PE=4 SV=1	1	5	5	5	17.1	27.228	240	11.462	1.2366	1.08974	1.2288	1.01818	0.939326	0.939035	0.814747	0.0157483
A0A1D5NZ30;P15771	A0A1D5NZ30;P15771	tr|A0A1D5NZ30|A0A1D5NZ30_CHICK Nucleolin OS=Gallus gallus OX=9031 GN=NCL PE=4 SV=1;sp|P15771|NUCL_CHICK Nucleolin OS=Gallus gallus OX=9031 GN=NCL PE=1 SV=1	2	3	3	3	4.9	75.399	691	25.541	1.21445	1.09983	1.03349	0.763003	0.72367	0.891457	0.710364	0.0115592
A0A1D5P5L5	A0A1D5P5L5	tr|A0A1D5P5L5|A0A1D5P5L5_CHICK Methyltransf_11 domain-containing protein OS=Gallus gallus OX=9031 GN=LOC107048987 PE=4 SV=1	1	3	3	3	11.1	30.318	271	10.136	1.14033		1.2413	0.824448		0.793341	0.679278	0.0186022
A0A1D5PAE4	A0A1D5PAE4	tr|A0A1D5PAE4|A0A1D5PAE4_CHICK PWWP domain-containing protein OS=Gallus gallus OX=9031 GN=HDGFL1 PE=4 SV=1	1	6	6	6	30.2	26.248	232	9.8286	1.19943	1.09258	1.05581	0.818666	0.949541	0.945534	0.810599	0.0254926
A0A1D5PHE7;G1K2Z4;Q5ZKX6;A0A1L1S0G1	A0A1D5PHE7;G1K2Z4;Q5ZKX6;A0A1L1S0G1	tr|A0A1D5PHE7|A0A1D5PHE7_CHICK NEDD8-conjugating enzyme UBE2F OS=Gallus gallus OX=9031 GN=UBE2F PE=3 SV=1;tr|G1K2Z4|G1K2Z4_CHICK NEDD8-conjugating enzyme UBE2F OS=Gallus gallus OX=9031 GN=UBE2F PE=3 SV=3;sp|Q5ZKX6|UBE2F_CHICK NEDD8-conjugating enzyme UBE2F	4	1	1	1	8.3	13.624	120	15.241	1.26929	1.09886	1.1305	0.959842	0.877079	1.00004	0.810872	0.0256786
A0A1D5PJI9	A0A1D5PJI9	tr|A0A1D5PJI9|A0A1D5PJI9_CHICK Uncharacterized protein OS=Gallus gallus OX=9031 GN=VPS13A PE=4 SV=2	1	2	2	2	0.6	360.66	3193	3.0953	1.28181	1.25274	1.26449	1.02636	1.02338	0.915449	0.780512	0.0017588
A0A1D5PKQ4;A0A1D5NY11;A0A1D5P959;A0A1D5PE57;P12105;Q90612	A0A1D5PKQ4;A0A1D5NY11;A0A1D5P959;A0A1D5PE57;P12105	tr|A0A1D5PKQ4|A0A1D5PKQ4_CHICK Collagen alpha-1(III) chain OS=Gallus gallus OX=9031 GN=COL3A1 PE=4 SV=2;tr|A0A1D5NY11|A0A1D5NY11_CHICK Collagen alpha-1(III) chain OS=Gallus gallus OX=9031 GN=COL3A1 PE=4 SV=2;tr|A0A1D5P959|A0A1D5P959_CHICK Collagen alpha-1(	6	10	9	9	7.6	132.44	1384	37.046	1.62026	1.48163	1.63498	0.615272	0.812542	0.590925	0.426176	0.000448755
A0A1D5PNR0	A0A1D5PNR0	tr|A0A1D5PNR0|A0A1D5PNR0_CHICK RNA-binding protein 8A OS=Gallus gallus OX=9031 GN=RBM8A PE=3 SV=2	1	3	3	3	23.3	18.431	163	41.088	1.05429	1.17255	0.963512	0.814948	0.92758	0.857379	0.814927	0.0460036
A0A1D5PTE8;Q5ZJ22	A0A1D5PTE8;Q5ZJ22	tr|A0A1D5PTE8|A0A1D5PTE8_CHICK Glia maturation factor OS=Gallus gallus OX=9031 GN=GMFB PE=3 SV=2;tr|Q5ZJ22|Q5ZJ22_CHICK Glia maturation factor OS=Gallus gallus OX=9031 GN=RCJMB04_21j8 PE=2 SV=1	2	2	2	2	16.3	16.592	141	23.872	1.2148	1.26256	1.13764	1.0022	0.663216	0.759689	0.670843	0.0208377
A0A1D5PWD7;A0A3Q2U545;A0A3Q2TWW5;A0A3Q2UM93	A0A1D5PWD7;A0A3Q2U545;A0A3Q2TWW5;A0A3Q2UM93	tr|A0A1D5PWD7|A0A1D5PWD7_CHICK PHB domain-containing protein OS=Gallus gallus OX=9031 GN=FLOT1 PE=4 SV=2;tr|A0A3Q2U545|A0A3Q2U545_CHICK BRCT domain-containing protein OS=Gallus gallus OX=9031 GN=FLOT1 PE=4 SV=1;tr|A0A3Q2TWW5|A0A3Q2TWW5_CHICK BRCT domain-co	4	5	5	5	7.8	57.625	541	10.955	1.14712	1.21153	1.14151	0.854597	1.02174	1.00248	0.822479	0.0225628
A0A1I7Q403;Q90879	A0A1I7Q403;Q90879	tr|A0A1I7Q403|A0A1I7Q403_CHICK Ubiquitin-conjugating enzyme E2 variant 1 OS=Gallus gallus OX=9031 GN=UBE2V1 PE=4 SV=2;sp|Q90879|UB2V1_CHICK Ubiquitin-conjugating enzyme E2 variant 1 OS=Gallus gallus OX=9031 GN=UBE2V1 PE=2 SV=2	2	4	1	1	32	16.463	147	1.8911	1.31405	1.24486	1.0846	0.818058	0.856766	0.995675	0.732949	0.0201442
A0A1L1RIQ6;A0A1D5PNV6;F1NNQ3;Q5ZIL2	A0A1L1RIQ6;A0A1D5PNV6;F1NNQ3;Q5ZIL2	tr|A0A1L1RIQ6|A0A1L1RIQ6_CHICK Vacuolar protein sorting-associated protein 29 OS=Gallus gallus OX=9031 GN=VPS29 PE=3 SV=1;tr|A0A1D5PNV6|A0A1D5PNV6_CHICK Vacuolar protein sorting-associated protein 29 OS=Gallus gallus OX=9031 GN=VPS29 PE=3 SV=2;tr|F1NNQ3|F1	4	1	1	1	7.1	20.517	182	10.871	1.24996	1.14675	1.27728	0.894288	0.721211	0.887784	0.681353	0.00486589
A0A1L1S0E4;F1P418	A0A1L1S0E4;F1P418	tr|A0A1L1S0E4|A0A1L1S0E4_CHICK TP_methylase domain-containing protein OS=Gallus gallus OX=9031 GN=DPH5 PE=4 SV=2;tr|F1P418|F1P418_CHICK TP_methylase domain-containing protein OS=Gallus gallus OX=9031 GN=DPH5 PE=3 SV=2	2	1	1	1	6.9	19.477	174	2.9569	1.39184	1.21895	1.15861	0.750737	0.919811	1.03426	0.71757	0.0303463
A0A286QZR1;A0A292SXQ0;F1NJK8	A0A286QZR1;A0A292SXQ0;F1NJK8	tr|A0A286QZR1|A0A286QZR1_CHICK Arginine methyltransferase 1 variant 1 OS=Gallus gallus OX=9031 GN=prmt1 PE=2 SV=1;tr|A0A292SXQ0|A0A292SXQ0_CHICK Arginine methyltransferase 1 variant 2 OS=Gallus gallus OX=9031 GN=prmt1 PE=2 SV=1;tr|F1NJK8|F1NJK8_CHICK Uncha	3	2	2	2	6	40.404	351	1.727	1.78567	1.61277	1.11545	0.645473	0.851555	0.994045	0.551868	0.0400321
A0A3Q2U769	A0A3Q2U769	tr|A0A3Q2U769|A0A3Q2U769_CHICK GOLD domain-containing protein OS=Gallus gallus OX=9031 GN=TMED2 PE=3 SV=1	1	3	3	1	17.8	23.29	208	14.587	1.40951	1.61799	1.12305	0.726935	0.910844	0.966341	0.627416	0.0326459
A0A3Q2U9K9;A0A3Q2TVP3;A0A1D5PTF1	A0A3Q2U9K9;A0A3Q2TVP3;A0A1D5PTF1	tr|A0A3Q2U9K9|A0A3Q2U9K9_CHICK Uncharacterized protein OS=Gallus gallus OX=9031 GN=SPEG PE=4 SV=1;tr|A0A3Q2TVP3|A0A3Q2TVP3_CHICK Uncharacterized protein OS=Gallus gallus OX=9031 GN=SPEG PE=4 SV=1;tr|A0A1D5PTF1|A0A1D5PTF1_CHICK Uncharacterized protein OS=Ga	3	44	44	44	16	366.98	3362	117.3	1.24629	1.29272	1.05463	0.927593	0.939956	1.0437	0.810109	0.0495013
A0A3Q2UAY3	A0A3Q2UAY3	tr|A0A3Q2UAY3|A0A3Q2UAY3_CHICK FXYD domain-containing ion transport regulator OS=Gallus gallus OX=9031 GN=LOC112530976 PE=3 SV=1	1	1	1	1	11.7	9.0033	77	2.2826	1.22767	1.1834	1.16653	0.872831	0.903781	1.00148	0.776523	0.00339952
A0A3Q2UBV6;F1P4N9;F1N8W3;A0A3Q2UC30;A0A3Q2TUR8;A0A3Q2U321;Q6DMS3;A0A3Q2U1B0;Q9DEX4	A0A3Q2UBV6;F1P4N9;F1N8W3;A0A3Q2UC30;A0A3Q2TUR8;A0A3Q2U321;Q6DMS3;A0A3Q2U1B0	tr|A0A3Q2UBV6|A0A3Q2UBV6_CHICK Uncharacterized protein OS=Gallus gallus OX=9031 GN=POSTN PE=4 SV=1;tr|F1P4N9|F1P4N9_CHICK Uncharacterized protein OS=Gallus gallus OX=9031 GN=POSTN PE=4 SV=2;tr|F1N8W3|F1N8W3_CHICK Uncharacterized protein OS=Gallus gallus OX	9	13	13	13	17.5	89.666	801	61.434	1.03071	1.06668	1.18169	0.865667	0.908134	0.743964	0.767828	0.0193402
A0A3Q2UD70;A0A3Q3AZS4;A2N887	A0A3Q2UD70;A0A3Q3AZS4;A2N887	tr|A0A3Q2UD70|A0A3Q2UD70_CHICK Ig-like domain-containing protein OS=Gallus gallus OX=9031 PE=4 SV=1;tr|A0A3Q3AZS4|A0A3Q3AZS4_CHICK Ig-like domain-containing protein OS=Gallus gallus OX=9031 PE=4 SV=1;tr|A2N887|A2N887_CHICK VH1 protein (Fragment) OS=Gallus	3	4	2	0	48.5	10.728	101	9.256	1.32265	1.29973	1.34826	0.975112	1.17556	0.851779	0.756164	0.0276957
A0A3Q2UDX5;A0A3Q2U3D6;A0A1D5P9E9;Q90631;E1C2P9	A0A3Q2UDX5;A0A3Q2U3D6;A0A1D5P9E9;Q90631;E1C2P9	tr|A0A3Q2UDX5|A0A3Q2UDX5_CHICK Kinectin OS=Gallus gallus OX=9031 GN=KTN1 PE=4 SV=1;tr|A0A3Q2U3D6|A0A3Q2U3D6_CHICK Kinectin OS=Gallus gallus OX=9031 GN=KTN1 PE=4 SV=1;tr|A0A1D5P9E9|A0A1D5P9E9_CHICK Kinectin OS=Gallus gallus OX=9031 GN=KTN1 PE=4 SV=2;sp|Q906	5	7	7	7	5.9	150.15	1311	18.215	1.1062	1.13324	1.14101	0.946663	0.999671	0.850665	0.827407	0.0123028
A0A3Q2UGE0;A0A3Q2UA24;A0A3Q2U6P5	A0A3Q2UGE0;A0A3Q2UA24;A0A3Q2U6P5	tr|A0A3Q2UGE0|A0A3Q2UGE0_CHICK Uncharacterized protein OS=Gallus gallus OX=9031 GN=LOC107051263 PE=4 SV=1;tr|A0A3Q2UA24|A0A3Q2UA24_CHICK Uncharacterized protein OS=Gallus gallus OX=9031 GN=LOC107051263 PE=4 SV=1;tr|A0A3Q2U6P5|A0A3Q2U6P5_CHICK Uncharacteriz	3	1	1	1	1.6	69.629	639	2.2432	1.45493	1.31159	1.35411	0.946262	0.876439	1.0091	0.687226	0.00168455
E1BT66;A0A1D5P411;A0A1D5PPI6;A0A3Q3AMH7	E1BT66	tr|E1BT66|E1BT66_CHICK Uncharacterized protein OS=Gallus gallus OX=9031 GN=TAF15 PE=4 SV=2	4	3	3	2	6.4	51.251	472	4.9807	1.40751	1.51525	1.12342	0.77656	0.943814	0.887977	0.644644	0.0194322
E1BVC4;A0A1D5NYF8;A0A1L1RNL7	E1BVC4;A0A1D5NYF8;A0A1L1RNL7	tr|E1BVC4|E1BVC4_CHICK WD_REPEATS_REGION domain-containing protein OS=Gallus gallus OX=9031 GN=SEC13 PE=3 SV=2;tr|A0A1D5NYF8|A0A1D5NYF8_CHICK WD_REPEATS_REGION domain-containing protein OS=Gallus gallus OX=9031 GN=SEC13 PE=3 SV=2;tr|A0A1L1RNL7|A0A1L1RNL7_C	3	2	2	2	7.8	33.651	306	2.3446	1.0331	0.997059	1.14422	0.796162	0.91018	0.877865	0.814081	0.0243127
E1BY00;Q5ZLF9;A0A3Q2UNH1	E1BY00;Q5ZLF9;A0A3Q2UNH1	tr|E1BY00|E1BY00_CHICK Uncharacterized protein OS=Gallus gallus OX=9031 GN=SRSF5 PE=4 SV=2;tr|Q5ZLF9|Q5ZLF9_CHICK RRM domain-containing protein OS=Gallus gallus OX=9031 GN=RCJMB04_6g11 PE=2 SV=1;tr|A0A3Q2UNH1|A0A3Q2UNH1_CHICK RRM domain-containing protein	3	3	3	3	14	30.414	264	5.3818	1.60739	1.60757	1.12335	0.831406	0.656718	1.03408	0.58138	0.0359309
E1BZL0;A0A1D5P9F2	E1BZL0;A0A1D5P9F2	tr|E1BZL0|E1BZL0_CHICK Uncharacterized protein OS=Gallus gallus OX=9031 GN=USP24 PE=3 SV=4;tr|A0A1D5P9F2|A0A1D5P9F2_CHICK Uncharacterized protein OS=Gallus gallus OX=9031 GN=USP24 PE=3 SV=2	2	4	4	4	1.9	292.26	2597	16.737	1.15529	1.06974	1.23899	0.975775	0.954185	0.872552	0.809036	0.0191779
E1C3A9;P81021	E1C3A9;P81021	tr|E1C3A9|E1C3A9_CHICK Vigilin OS=Gallus gallus OX=9031 GN=HDLBP PE=4 SV=1;sp|P81021|VIGLN_CHICK Vigilin OS=Gallus gallus OX=9031 GN=HDLBP PE=2 SV=1	2	4	4	4	3	141.6	1267	9.0686	1.11825	1.17823	1.15517	0.83195	1.01246	0.959743	0.812408	0.0186309
E1C3R1	E1C3R1	tr|E1C3R1|E1C3R1_CHICK PCI domain-containing protein OS=Gallus gallus OX=9031 GN=COPS7B PE=4 SV=3	1	2	2	2	6.5	44.841	400	20.777	1.37123	1.37774	1.25416	0.792009	0.870698	1.02898	0.672394	0.00555887
E1C4C6;A0A1D5PRI5	E1C4C6;A0A1D5PRI5	tr|E1C4C6|E1C4C6_CHICK Calponin-homology (CH) domain-containing protein OS=Gallus gallus OX=9031 GN=SMTNL2 PE=4 SV=1;tr|A0A1D5PRI5|A0A1D5PRI5_CHICK Calponin-homology (CH) domain-containing protein OS=Gallus gallus OX=9031 GN=SMTNL2 PE=4 SV=1	2	6	6	6	19	50.783	458	29.544	1.19079	1.34147	1.28017	0.912962	0.977453	0.886602	0.728413	0.00256139
E1C4L6;A0A3Q3A5A5;A0A3Q3AAQ4	E1C4L6;A0A3Q3A5A5;A0A3Q3AAQ4	tr|E1C4L6|E1C4L6_CHICK Uncharacterized protein OS=Gallus gallus OX=9031 GN=ITGB1BP2 PE=4 SV=3;tr|A0A3Q3A5A5|A0A3Q3A5A5_CHICK Uncharacterized protein OS=Gallus gallus OX=9031 GN=ITGB1BP2 PE=4 SV=1;tr|A0A3Q3AAQ4|A0A3Q3AAQ4_CHICK CHORD domain-containing prote	3	7	7	7	14.3	54.426	505	9.3989	1.31771	0.931087	1.32915	0.692144	0.614625	0.888055	0.61343	0.0402338
E1C5I7	E1C5I7	tr|E1C5I7|E1C5I7_CHICK Uncharacterized protein OS=Gallus gallus OX=9031 GN=DUSP27 PE=3 SV=3	1	2	2	2	3	128.21	1134	5.0116	1.16276	1.26869	1.06398	0.791613	0.843945	0.979788	0.74822	0.0227464
E1C8Y9	E1C8Y9	tr|E1C8Y9|E1C8Y9_CHICK RRM domain-containing protein OS=Gallus gallus OX=9031 GN=SRSF3 PE=4 SV=1	1	2	2	1	13.4	19.329	164	3.5504	1.0836	1.14472		0.941039	0.902599		0.827366	0.033474
F1N8D4;A0A1D5PXM1;A0A3Q2U9M2;A0A1D5NYG3	F1N8D4;A0A1D5PXM1;A0A3Q2U9M2;A0A1D5NYG3	tr|F1N8D4|F1N8D4_CHICK Uncharacterized protein OS=Gallus gallus OX=9031 GN=FLNB PE=4 SV=4;tr|A0A1D5PXM1|A0A1D5PXM1_CHICK Uncharacterized protein OS=Gallus gallus OX=9031 GN=FLNB PE=4 SV=3;tr|A0A3Q2U9M2|A0A3Q2U9M2_CHICK Uncharacterized protein OS=Gallus gal	4	7	3	3	2.5	273	2549	3.2718	1.38304	1.52121	1.05395	1.00682	0.880598	0.82489	0.685238	0.0491422
F1NCK8;A0A1D5PTW6	F1NCK8;A0A1D5PTW6	tr|F1NCK8|F1NCK8_CHICK Glycophorin C OS=Gallus gallus OX=9031 GN=GYPC PE=2 SV=2;tr|A0A1D5PTW6|A0A1D5PTW6_CHICK Uncharacterized protein OS=Gallus gallus OX=9031 GN=CNTNAP2 PE=4 SV=2	2	1	1	1	9.7	10.071	93	2.8661	1.2499	1.31041	1.05603	0.942491	0.95912	0.970292	0.794146	0.0323855
F1NCS6	F1NCS6	tr|F1NCS6|F1NCS6_CHICK Uncharacterized protein OS=Gallus gallus OX=9031 GN=MTHFD1L PE=3 SV=3	1	3	3	3	3.4	106.89	988	16.053	1.3272	1.1998	1.12246	1.0327	0.903897	0.97351	0.79741	0.0248192
F1NDL4;A0A3Q2TSW8	F1NDL4;A0A3Q2TSW8	tr|F1NDL4|F1NDL4_CHICK Uncharacterized protein OS=Gallus gallus OX=9031 GN=NID2 PE=4 SV=4;tr|A0A3Q2TSW8|A0A3Q2TSW8_CHICK Uncharacterized protein OS=Gallus gallus OX=9031 GN=NID2 PE=4 SV=1	2	3	3	3	3.9	120.57	1127	17.996	1.24602	1.13012	1.33141	1.01585	1.04058	0.867299	0.788589	0.0303917
F1NIX0	F1NIX0	tr|F1NIX0|F1NIX0_CHICK Ribosomal_L2_C domain-containing protein OS=Gallus gallus OX=9031 GN=RPL8 PE=3 SV=2	1	3	3	3	11.7	28.022	257	13.822	1.11111	1.10312		0.795699	0.850794		0.743595	0.00947938
F1NPL9	F1NPL9	tr|F1NPL9|F1NPL9_CHICK Uncharacterized protein OS=Gallus gallus OX=9031 GN=COX17 PE=4 SV=2	1	2	2	2	26.9	7.2084	67	8.645	1.16416	1.07276	1.00679	0.794915	0.849597	0.931471	0.794148	0.0211856
F1NSK8;Q5ZMJ1	F1NSK8;Q5ZMJ1	tr|F1NSK8|F1NSK8_CHICK Uncharacterized protein OS=Gallus gallus OX=9031 GN=ADPRH PE=4 SV=3;tr|Q5ZMJ1|Q5ZMJ1_CHICK Uncharacterized protein OS=Gallus gallus OX=9031 GN=RCJMB04_1o1 PE=2 SV=1	2	2	2	2	4.7	42.135	384	3.3212	1.34008	1.28955	1.37413	1.01417	0.952654	1.02328	0.746826	0.000519142
F1NSZ5	F1NSZ5	tr|F1NSZ5|F1NSZ5_CHICK Uncharacterized protein OS=Gallus gallus OX=9031 GN=LAMA4 PE=4 SV=2	1	12	12	12	8.2	202.47	1827	118.7	1.29662	1.21256	1.19779	0.962829	0.938519	0.954889	0.770504	0.000853154
F1NUI2;Q91957;Q789E4	F1NUI2;Q91957	tr|F1NUI2|F1NUI2_CHICK Uncharacterized protein OS=Gallus gallus OX=9031 GN=XIRP1 PE=3 SV=2;sp|Q91957|XIRP1_CHICK Xin actin-binding repeat-containing protein 1 OS=Gallus gallus OX=9031 GN=Xirp1 PE=2 SV=3	3	30	30	30	13.3	284.61	2563	169.9	0.968166	0.999275	0.990656	0.723542	0.835394	0.77519	0.789063	0.00347111
F1NV68;C6KIB2	F1NV68;C6KIB2	tr|F1NV68|F1NV68_CHICK Importin subunit alpha OS=Gallus gallus OX=9031 GN=KPNA3 PE=3 SV=3;tr|C6KIB2|C6KIB2_CHICK Importin alpha 4 (Fragment) OS=Gallus gallus OX=9031 GN=KPNA3 PE=2 SV=1	2	3	2	2	6.9	57.928	523	20.044	1.22538	1.21623	1.03864	0.890182	0.90565	0.939838	0.786054	0.0165438
F1NWN4	F1NWN4	tr|F1NWN4|F1NWN4_CHICK Uncharacterized protein OS=Gallus gallus OX=9031 GN=FBLN2 PE=4 SV=4	1	1	1	1	0.8	132.32	1196	2.428	1.28715	1.39255	1.03238	0.732484	0.787623	0.703976	0.599147	0.0106453
P05122;F1NZ30;A0A1L1RT82	P05122;F1NZ30;A0A1L1RT82	sp|P05122|KCRB_CHICK Creatine kinase B-type OS=Gallus gallus OX=9031 GN=CKB PE=1 SV=1;tr|F1NZ30|F1NZ30_CHICK Creatine kinase B-type OS=Gallus gallus OX=9031 GN=CKB PE=3 SV=3;tr|A0A1L1RT82|A0A1L1RT82_CHICK Creatine kinase B-type OS=Gallus gallus OX=9031 GN=	3	6	3	3	20.7	42.87	381	16.972	1.04879	1.19468	1.11385	0.925628	0.991274	0.861127	0.827455	0.0268386
P37301;A0A1D5NXP5	P37301;A0A1D5NXP5	sp|P37301|MYP0_CHICK Myelin protein P0 OS=Gallus gallus OX=9031 GN=MPZ PE=2 SV=1;tr|A0A1D5NXP5|A0A1D5NXP5_CHICK Myelin protein P0 OS=Gallus gallus OX=9031 GN=MPZ PE=4 SV=1	2	2	2	2	7.6	27.466	249	6.5137	2.06297	1.40484	2.01481	0.693355	1.33263	0.726626	0.502062	0.0373995
Q02020;F1NUL9;B4ZBS4	Q02020;F1NUL9	sp|Q02020|FIBB_CHICK Fibrinogen beta chain (Fragment) OS=Gallus gallus OX=9031 GN=FGB PE=1 SV=1;tr|F1NUL9|F1NUL9_CHICK Fibrinogen beta chain OS=Gallus gallus OX=9031 GN=FGB PE=4 SV=3	3	5	5	5	11.4	52.678	463	13.436	1.12072	1.00577	1.10771	0.691766	0.960899	0.768008	0.748461	0.0368101
Q2HZ96	Q2HZ96	sp|Q2HZ96|AT1B4_CHICK Protein ATP1B4 OS=Gallus gallus OX=9031 GN=ATP1B4 PE=1 SV=1	1	2	2	2	8.1	36.362	321	6.2521	1.2834	1.19108	1.17589	0.742315	0.769892	0.880357	0.655431	0.00147472
Q58I02;Q5ZLA4;K9J9Q6;G8XRU0	Q58I02	tr|Q58I02|Q58I02_CHICK Nicotinamide phosphoribosyltransferase OS=Gallus gallus OX=9031 GN=PBEF1 PE=2 SV=1	4	9	9	9	15.2	55.586	493	11.332	1.32435	1.19487	1.20717	0.832201	0.907886	0.916678	0.71296	0.00192633
Q5F3X1;R4GHL2	Q5F3X1;R4GHL2	tr|Q5F3X1|Q5F3X1_CHICK Protein kinase C OS=Gallus gallus OX=9031 GN=PRKCA PE=2 SV=1;tr|R4GHL2|R4GHL2_CHICK Protein kinase C OS=Gallus gallus OX=9031 GN=PRKCA PE=3 SV=2	2	2	2	2	3.7	76.845	674	3.4069	1.7888	1.60739	1.1494	0.722273	0.934868	0.985365	0.581334	0.0372876
Q5ZK63;A0A1D5P521;A0A182C621;A0A182C5X3	Q5ZK63;A0A1D5P521;A0A182C621;A0A182C5X3	sp|Q5ZK63|TCP4_CHICK Activated RNA polymerase II transcriptional coactivator p15 OS=Gallus gallus OX=9031 GN=SUB1 PE=2 SV=1;tr|A0A1D5P521|A0A1D5P521_CHICK PC4 domain-containing protein OS=Gallus gallus OX=9031 GN=RPTC15L PE=4 SV=1;tr|A0A182C621|A0A182C621_	4	2	2	2	15.9	14.237	126	8.7526	1.11672	1.06706	1.15143	0.813775	0.77232	0.818792	0.721061	0.000408905
Q5ZKA4	Q5ZKA4	sp|Q5ZKA4|EIF3J_CHICK Eukaryotic translation initiation factor 3 subunit J OS=Gallus gallus OX=9031 GN=EIF3J PE=2 SV=1	1	6	6	6	28.2	28.724	252	29.192	1.14278	1.2886	1.00045	0.88963	0.852818	0.886081	0.765928	0.0332984
Q5ZLB3;A0A1D5P5G1	Q5ZLB3;A0A1D5P5G1	tr|Q5ZLB3|Q5ZLB3_CHICK Uncharacterized protein OS=Gallus gallus OX=9031 GN=HNRNPA1 PE=2 SV=1;tr|A0A1D5P5G1|A0A1D5P5G1_CHICK Uncharacterized protein OS=Gallus gallus OX=9031 GN=HNRNPA1 PE=4 SV=2	2	2	1	1	5.2	38.166	368	2.1821	1.30913	1.44431		0.763308	0.833135		0.5798	0.0168571
Q5ZM33;F1N8H6	Q5ZM33;F1N8H6	sp|Q5ZM33|HP1B3_CHICK Heterochromatin protein 1-binding protein 3 OS=Gallus gallus OX=9031 GN=HP1BP3 PE=2 SV=1;tr|F1N8H6|F1N8H6_CHICK Heterochromatin protein 1-binding protein 3 OS=Gallus gallus OX=9031 GN=HP1BP3 PE=4 SV=1	2	2	2	2	3.9	61.851	559	2.6196	1.33199	1.26204	1.13386	0.841723	0.869752	0.979765	0.721922	0.00852452
Q5ZM59	Q5ZM59	tr|Q5ZM59|Q5ZM59_CHICK FXYD domain-containing ion transport regulator OS=Gallus gallus OX=9031 GN=FXYD6 PE=2 SV=1	1	1	1	1	23.2	10.212	95	15.969	1.09569	1.13394	1.13673	0.877708	0.768899	0.815083	0.73126	0.00091252
Q5ZMI7	Q5ZMI7	tr|Q5ZMI7|Q5ZMI7_CHICK Uncharacterized protein OS=Gallus gallus OX=9031 GN=RCJMB04_1o16 PE=2 SV=1	1	11	1	1	17.7	80.79	710	11.228	1.53562	1.44077	1.45001	0.680133	0.976449	0.883763	0.573907	0.00245544
Q68BG1;Q5ZID4;A0A1D5NWN5	Q68BG1;Q5ZID4;A0A1D5NWN5	tr|Q68BG1|Q68BG1_CHICK NAD-dependent protein deacetylase OS=Gallus gallus OX=9031 GN=sirt2 PE=2 SV=1;tr|Q5ZID4|Q5ZID4_CHICK NAD-dependent protein deacetylase OS=Gallus gallus OX=9031 GN=RCJMB04_27m5 PE=2 SV=1;tr|A0A1D5NWN5|A0A1D5NWN5_CHICK Deacetylase sirt	3	2	2	2	9.3	42.495	388	7.1101	0.966109	1.15899	0.973339	0.792391	0.772231	0.899566	0.795301	0.0469196
Q8AWE3;Q5ZLP4;F1NBJ2;A0A1D5PED5	Q8AWE3;Q5ZLP4;F1NBJ2;A0A1D5PED5	tr|Q8AWE3|Q8AWE3_CHICK Serine/threonine-protein phosphatase 2A 55 kDa regulatory subunit B (Fragment) OS=Gallus gallus OX=9031 PE=2 SV=1;tr|Q5ZLP4|Q5ZLP4_CHICK Serine/threonine-protein phosphatase 2A 55 kDa regulatory subunit B OS=Gallus gallus OX=9031 GN=	4	2	2	2	5.2	49.697	426	3.0658	1.84748	1.75803	1.07157	0.690342	0.83611	0.957116	0.531009	0.0465986
Q8JIG5;A7UEB0	Q8JIG5;A7UEB0	tr|Q8JIG5|Q8JIG5_CHICK Alpha-1-acid glycoprotein OS=Gallus gallus OX=9031 GN=ogchi PE=2 SV=1;tr|A7UEB0|A7UEB0_CHICK Alpha-1-acid glycoprotein OS=Gallus gallus OX=9031 GN=OGCHI PE=2 SV=1	2	2	2	2	10.3	22.321	203	8.6911	1.60418	1.48147	1.32552	0.81387	0.88221	0.848652	0.576884	0.00169528
Q8QGU2	Q8QGU2	tr|Q8QGU2|Q8QGU2_CHICK Peptidylprolyl isomerase OS=Gallus gallus OX=9031 GN=FKBP12.6 PE=2 SV=1	1	1	1	1	12	11.957	108	24.51	1.41477	1.29167	1.11621	0.831771	0.906592	0.867009	0.681562	0.0104597
Q90576	Q90576	tr|Q90576|Q90576_CHICK 450 kDa protein (Fragment) OS=Gallus gallus OX=9031 PE=2 SV=1	1	2	1	1	7.1	47.43	465	5.1966	1.1806	1.22573		0.877679	0.921086		0.747513	0.0104571
Q90WR3	Q90WR3	tr|Q90WR3|Q90WR3_CHICK Hemopexin (Fragment) OS=Gallus gallus OX=9031 PE=2 SV=1	1	1	1	1	3.8	29.384	261	3.4996	1.22509	1.07605	1.25124	0.79796	0.835861	0.827954	0.692995	0.0028599
Q91008;A5HUM6	Q91008;A5HUM6	tr|Q91008|Q91008_CHICK Tenascin Y variant OS=Gallus gallus OX=9031 GN=tn-y PE=2 SV=1;tr|A5HUM6|A5HUM6_CHICK Tenascin X B OS=Gallus gallus OX=9031 GN=TNXB PE=4 SV=1	2	6	6	6	16	206.58	1914	77.495	1.50521	1.14852	1.13382	0.761449	0.994655	0.87486	0.694634	0.0499805
Q9W744;A0A3S5ZPN3	Q9W744;A0A3S5ZPN3	tr|Q9W744|Q9W744_CHICK DEAD-box RNA helicase OS=Gallus gallus OX=9031 PE=2 SV=1;tr|A0A3S5ZPN3|A0A3S5ZPN3_CHICK Uncharacterized protein OS=Gallus gallus OX=9031 GN=DDX5 PE=3 SV=1	2	3	3	2	5.7	66.736	595	7.1073	1.34775	1.44065		0.676379	0.931469		0.57662	0.049025
R4GJY1	R4GJY1	tr|R4GJY1|R4GJY1_CHICK ORM1-like protein OS=Gallus gallus OX=9031 GN=ORMDL3 PE=3 SV=2	1	1	1	1	9.8	17.665	153	2.5467	1.53596	1.65922		0.93469	1.07452		0.628825	0.0238232
