# Supplementary material for: Comprehensive Proteomic Characterization of the Pectoralis Major at Three Chronological Ages in Beijing-You Chicken
Source: Front Physiol. 2021 Mar 18;12:658711. doi: 10.3389/fphys.2021.658711 (PMC8012914; doi:10.3389/fphys.2021.658711)
Supplement: Supplementary Table 3 — Gene Ontology (GO) analysis of 1,413 proteins in chicken breast muscle. [file Table_3.xlsx]

## Sheet: BP-P120 vs P90
maxLevel	levels	GO_Name	GO_ID	Pvalue	Pvalue_adjusted	Genes	Count	Pop_Hit	List_Total	Background_Genes	URL
12	9,10,11,12	regulation of calcium ion transmembrane transport via high voltage-gated calcium channel	GO:1902514	0.00e+00	0.00e+00	A0A3Q2TTX7|1.32240644;A0A3Q3ATJ1|1.201501275	2	1	121	21829	http://www.ebi.ac.uk/QuickGO/GTerm?id=GO:1902514
6	6	striated muscle contraction	GO:0006941	2.72e-07	0.000227	TNNT3|1.527716062;A0A3Q3ATJ1|1.201501275;LMOD3|1.522555731;MYOM2|1.223302409;TPM1|1.390357267;ATP2A1|1.2337889;MYBPC2|1.243510197;FKBP12.6|0.773369444	8	116	121	21829	http://www.ebi.ac.uk/QuickGO/GTerm?id=GO:0006941
5	5	purine-containing compound metabolic process	GO:0072521	4.2e-07	0.000234	ENO1|1.301513562;A0A3Q2UEL1|1.305534201;ACAT1|1.26178047;AMPD3|1.306784743;GPI|1.354148803;ATP5F1|1.373436785;PGK1|1.22553449;ADSSL1|1.469655536;ENO3|1.243593921;OARD1|1.518785107;HSP70|1.283172572;COX7C|1.254685321;ALDOC|1.365001997;PANK4|0.649364304;MTHFD1L|0.749713642	15	552	121	21829	http://www.ebi.ac.uk/QuickGO/GTerm?id=GO:0072521
5	5	muscle contraction	GO:0006936	8.97e-07	0.000375	TNNT3|1.527716062;A0A3Q3ATJ1|1.201501275;LMOD3|1.522555731;MYOM1|1.254881107;MYOM2|1.223302409;ENSGALG00000002907|1.322866394;TPM1|1.390357267;ATP2A1|1.2337889;MYBPC2|1.243510197;FKBP12.6|0.773369444	10	239	121	21829	http://www.ebi.ac.uk/QuickGO/GTerm?id=GO:0006936
7	7	purine ribonucleotide metabolic process	GO:0009150	3.71e-06	0.000992	ENO1|1.301513562;A0A3Q2UEL1|1.305534201;ACAT1|1.26178047;AMPD3|1.306784743;GPI|1.354148803;ATP5F1|1.373436785;PGK1|1.22553449;ADSSL1|1.469655536;ENO3|1.243593921;HSP70|1.283172572;COX7C|1.254685321;ALDOC|1.365001997;PANK4|0.649364304	13	494	121	21829	http://www.ebi.ac.uk/QuickGO/GTerm?id=GO:0009150
4	4	muscle system process	GO:0003012	3.72e-06	0.000992	TNNT3|1.527716062;A0A3Q3ATJ1|1.201501275;LMOD3|1.522555731;MYOM1|1.254881107;MYOM2|1.223302409;ENSGALG00000002907|1.322866394;TPM1|1.390357267;ATP2A1|1.2337889;MYBPC2|1.243510197;FKBP12.6|0.773369444	10	280	121	21829	http://www.ebi.ac.uk/QuickGO/GTerm?id=GO:0003012
9	8,9	ATP metabolic process	GO:0046034	5e-06	0.000992	ENO1|1.301513562;AMPD3|1.306784743;GPI|1.354148803;ATP5F1|1.373436785;PGK1|1.22553449;ENO3|1.243593921;HSP70|1.283172572;COX7C|1.254685321;ALDOC|1.365001997	9	227	121	21829	http://www.ebi.ac.uk/QuickGO/GTerm?id=GO:0046034
6	6	purine nucleoside metabolic process	GO:0042278	5e-06	0.000992	AMPD3|1.306784743;GPI|1.354148803;ATP5F1|1.373436785;PGK1|1.22553449;ADSSL1|1.469655536;ENO3|1.243593921;OARD1|1.518785107;ALDOC|1.365001997;PANK4|0.649364304	9	227	121	21829	http://www.ebi.ac.uk/QuickGO/GTerm?id=GO:0042278
6	6	purine nucleotide metabolic process	GO:0006163	5.35e-06	0.000992	ENO1|1.301513562;A0A3Q2UEL1|1.305534201;ACAT1|1.26178047;AMPD3|1.306784743;GPI|1.354148803;ATP5F1|1.373436785;PGK1|1.22553449;ADSSL1|1.469655536;ENO3|1.243593921;HSP70|1.283172572;COX7C|1.254685321;ALDOC|1.365001997;PANK4|0.649364304	13	511	121	21829	http://www.ebi.ac.uk/QuickGO/GTerm?id=GO:0006163
7	6,7	ribonucleotide metabolic process	GO:0009259	6.32e-06	0.00104	ENO1|1.301513562;A0A3Q2UEL1|1.305534201;ACAT1|1.26178047;AMPD3|1.306784743;GPI|1.354148803;ATP5F1|1.373436785;PGK1|1.22553449;ADSSL1|1.469655536;ENO3|1.243593921;HSP70|1.283172572;COX7C|1.254685321;ALDOC|1.365001997;PANK4|0.649364304	13	519	121	21829	http://www.ebi.ac.uk/QuickGO/GTerm?id=GO:0009259
5	4,5	nucleobase-containing small molecule metabolic process	GO:0055086	6.88e-06	0.00104	ENO1|1.301513562;A0A3Q2UEL1|1.305534201;ACAT1|1.26178047;AMPD3|1.306784743;GPI|1.354148803;ATP5F1|1.373436785;PGK1|1.22553449;ADSSL1|1.469655536;ENO3|1.243593921;OARD1|1.518785107;HSP70|1.283172572;COX7C|1.254685321;ALDOC|1.365001997;PANK4|0.649364304;MTHFD1L|0.749713642;PBEF1|0.760519451	16	783	121	21829	http://www.ebi.ac.uk/QuickGO/GTerm?id=GO:0055086
5	5	coenzyme metabolic process	GO:0006732	8.59e-06	0.00112	ENO1|1.301513562;A0A3Q2UEL1|1.305534201;ACAT1|1.26178047;GPI|1.354148803;PGK1|1.22553449;ENO3|1.243593921;ALDOC|1.365001997;PANK4|0.649364304;MTHFD1L|0.749713642;PBEF1|0.760519451	10	308	121	21829	http://www.ebi.ac.uk/QuickGO/GTerm?id=GO:0006732
5	5	ribose phosphate metabolic process	GO:0019693	8.75e-06	0.00112	ENO1|1.301513562;A0A3Q2UEL1|1.305534201;ACAT1|1.26178047;AMPD3|1.306784743;GPI|1.354148803;ATP5F1|1.373436785;PGK1|1.22553449;ADSSL1|1.469655536;ENO3|1.243593921;HSP70|1.283172572;COX7C|1.254685321;ALDOC|1.365001997;PANK4|0.649364304	13	535	121	21829	http://www.ebi.ac.uk/QuickGO/GTerm?id=GO:0019693
8	8	purine ribonucleoside triphosphate metabolic process	GO:0009205	1.49e-05	0.00175	ENO1|1.301513562;AMPD3|1.306784743;GPI|1.354148803;ATP5F1|1.373436785;PGK1|1.22553449;ENO3|1.243593921;HSP70|1.283172572;COX7C|1.254685321;ALDOC|1.365001997	9	260	121	21829	http://www.ebi.ac.uk/QuickGO/GTerm?id=GO:0009205
6	6	fibril organization	GO:0097435	1.57e-05	0.00175	KBTBD10|1.353350665;LMOD3|1.522555731;PDLIM3|1.286425032;MYOM2|1.223302409;MYPN|1.223593919;TPM1|1.390357267;MYBPC2|1.243510197;CAPZA2|1.308764545;HSP70|1.283172572;ENSGALG00000027330|1.235499055;GMFB|0.703153051	11	404	121	21829	http://www.ebi.ac.uk/QuickGO/GTerm?id=GO:0097435
7	7	purine nucleoside triphosphate metabolic process	GO:0009144	1.89e-05	0.00191	ENO1|1.301513562;AMPD3|1.306784743;GPI|1.354148803;ATP5F1|1.373436785;PGK1|1.22553449;ENO3|1.243593921;HSP70|1.283172572;COX7C|1.254685321;ALDOC|1.365001997	9	268	121	21829	http://www.ebi.ac.uk/QuickGO/GTerm?id=GO:0009144
9	8,9	ADP metabolic process	GO:0046031	2e-05	0.00191	ENO1|1.301513562;AMPD3|1.306784743;GPI|1.354148803;PGK1|1.22553449;ENO3|1.243593921;ALDOC|1.365001997	6	100	121	21829	http://www.ebi.ac.uk/QuickGO/GTerm?id=GO:0046031
10	8,9,10	calcium ion transmembrane transport	GO:0070588	2.12e-05	0.00191	RYR3|1.208753681;ATP2B4|1.454010951;ATP2B2|1.385296881;A0A3Q2TTX7|1.32240644;CATSPER2|1.202421769;A0A3Q3ATJ1|1.201501275;ATP2A1|1.2337889;HSP70|1.283172572;FKBP12.6|0.773369444	9	272	121	21829	http://www.ebi.ac.uk/QuickGO/GTerm?id=GO:0070588
7	7	ribonucleoside triphosphate metabolic process	GO:0009199	2.38e-05	0.00191	ENO1|1.301513562;AMPD3|1.306784743;GPI|1.354148803;ATP5F1|1.373436785;PGK1|1.22553449;ENO3|1.243593921;HSP70|1.283172572;COX7C|1.254685321;ALDOC|1.365001997	9	276	121	21829	http://www.ebi.ac.uk/QuickGO/GTerm?id=GO:0009199
8	8	purine ribonucleoside monophosphate metabolic process	GO:0009167	2.45e-05	0.00191	AMPD3|1.306784743;GPI|1.354148803;ATP5F1|1.373436785;PGK1|1.22553449;ADSSL1|1.469655536;ENO3|1.243593921;HSP70|1.283172572;COX7C|1.254685321;ALDOC|1.365001997	9	277	121	21829	http://www.ebi.ac.uk/QuickGO/GTerm?id=GO:0009167
7	7	purine nucleoside monophosphate metabolic process	GO:0009126	2.59e-05	0.00191	AMPD3|1.306784743;GPI|1.354148803;ATP5F1|1.373436785;PGK1|1.22553449;ADSSL1|1.469655536;ENO3|1.243593921;HSP70|1.283172572;COX7C|1.254685321;ALDOC|1.365001997	9	279	121	21829	http://www.ebi.ac.uk/QuickGO/GTerm?id=GO:0009126
8	8	purine ribonucleoside diphosphate metabolic process	GO:0009179	2.63e-05	0.00191	ENO1|1.301513562;AMPD3|1.306784743;GPI|1.354148803;PGK1|1.22553449;ENO3|1.243593921;ALDOC|1.365001997	6	105	121	21829	http://www.ebi.ac.uk/QuickGO/GTerm?id=GO:0009179
7	7	purine nucleoside diphosphate metabolic process	GO:0009135	2.63e-05	0.00191	ENO1|1.301513562;AMPD3|1.306784743;GPI|1.354148803;PGK1|1.22553449;ENO3|1.243593921;ALDOC|1.365001997	6	105	121	21829	http://www.ebi.ac.uk/QuickGO/GTerm?id=GO:0009135
7	7	ribonucleoside diphosphate metabolic process	GO:0009185	2.93e-05	0.00204	ENO1|1.301513562;AMPD3|1.306784743;GPI|1.354148803;PGK1|1.22553449;ENO3|1.243593921;ALDOC|1.365001997	6	107	121	21829	http://www.ebi.ac.uk/QuickGO/GTerm?id=GO:0009185
5	5	nucleoside metabolic process	GO:0009116	3.06e-05	0.00205	AMPD3|1.306784743;GPI|1.354148803;ATP5F1|1.373436785;PGK1|1.22553449;ADSSL1|1.469655536;ENO3|1.243593921;OARD1|1.518785107;ALDOC|1.365001997;PANK4|0.649364304	9	285	121	21829	http://www.ebi.ac.uk/QuickGO/GTerm?id=GO:0009116
8	5,6,7,8	myofibril assembly	GO:0030239	3.28e-05	0.00211	KBTBD10|1.353350665;LMOD3|1.522555731;MYOM2|1.223302409;MYPN|1.223593919;MYBPC2|1.243510197	5	66	121	21829	http://www.ebi.ac.uk/QuickGO/GTerm?id=GO:0030239
8	7,8	myosin filament assembly	GO:0031034	3.52e-05	0.00218	MYOM2|1.223302409;ENSGALG00000002907|1.322866394;MYBPC2|1.243510197	3	12	121	21829	http://www.ebi.ac.uk/QuickGO/GTerm?id=GO:0031034
7	7	purine ribonucleoside metabolic process	GO:0046128	3.73e-05	0.00219	AMPD3|1.306784743;GPI|1.354148803;ATP5F1|1.373436785;PGK1|1.22553449;ADSSL1|1.469655536;ENO3|1.243593921;ALDOC|1.365001997;PANK4|0.649364304	8	225	121	21829	http://www.ebi.ac.uk/QuickGO/GTerm?id=GO:0046128
8	8	pyruvate metabolic process	GO:0006090	3.79e-05	0.00219	ENO1|1.301513562;GPI|1.354148803;PGK1|1.22553449;LDHA|1.406541698;ENO3|1.243593921;ALDOC|1.365001997	6	112	121	21829	http://www.ebi.ac.uk/QuickGO/GTerm?id=GO:0006090
6	6	nucleotide metabolic process	GO:0009117	4.17e-05	0.00226	ENO1|1.301513562;A0A3Q2UEL1|1.305534201;ACAT1|1.26178047;AMPD3|1.306784743;GPI|1.354148803;ATP5F1|1.373436785;PGK1|1.22553449;ADSSL1|1.469655536;ENO3|1.243593921;HSP70|1.283172572;COX7C|1.254685321;ALDOC|1.365001997;PANK4|0.649364304;PBEF1|0.760519451	14	713	121	21829	http://www.ebi.ac.uk/QuickGO/GTerm?id=GO:0009117
7	7	ribonucleoside monophosphate metabolic process	GO:0009161	4.22e-05	0.00226	AMPD3|1.306784743;GPI|1.354148803;ATP5F1|1.373436785;PGK1|1.22553449;ADSSL1|1.469655536;ENO3|1.243593921;HSP70|1.283172572;COX7C|1.254685321;ALDOC|1.365001997	9	297	121	21829	http://www.ebi.ac.uk/QuickGO/GTerm?id=GO:0009161
4	4	glycosyl compound metabolic process	GO:1901657	4.33e-05	0.00226	AMPD3|1.306784743;GPI|1.354148803;ATP5F1|1.373436785;PGK1|1.22553449;ADSSL1|1.469655536;ENO3|1.243593921;OARD1|1.518785107;ALDOC|1.365001997;PANK4|0.649364304	9	298	121	21829	http://www.ebi.ac.uk/QuickGO/GTerm?id=GO:1901657
6	6	myosin filament organization	GO:0031033	4.56e-05	0.0023	MYOM2|1.223302409;ENSGALG00000002907|1.322866394;MYBPC2|1.243510197	3	13	121	21829	http://www.ebi.ac.uk/QuickGO/GTerm?id=GO:0031033
6	6	nucleoside triphosphate metabolic process	GO:0009141	4.68e-05	0.0023	ENO1|1.301513562;AMPD3|1.306784743;GPI|1.354148803;ATP5F1|1.373436785;PGK1|1.22553449;ENO3|1.243593921;HSP70|1.283172572;COX7C|1.254685321;ALDOC|1.365001997	9	301	121	21829	http://www.ebi.ac.uk/QuickGO/GTerm?id=GO:0009141
4	4	cofactor metabolic process	GO:0051186	4.84e-05	0.00231	ENO1|1.301513562;A0A3Q2UEL1|1.305534201;ACAT1|1.26178047;GPI|1.354148803;PGK1|1.22553449;ENO3|1.243593921;ALDOC|1.365001997;PANK4|0.649364304;MTHFD1L|0.749713642;PBEF1|0.760519451	10	377	121	21829	http://www.ebi.ac.uk/QuickGO/GTerm?id=GO:0051186
5	5	nucleoside phosphate metabolic process	GO:0006753	4.99e-05	0.00231	ENO1|1.301513562;A0A3Q2UEL1|1.305534201;ACAT1|1.26178047;AMPD3|1.306784743;GPI|1.354148803;ATP5F1|1.373436785;PGK1|1.22553449;ADSSL1|1.469655536;ENO3|1.243593921;HSP70|1.283172572;COX7C|1.254685321;ALDOC|1.365001997;PANK4|0.649364304;PBEF1|0.760519451	14	725	121	21829	http://www.ebi.ac.uk/QuickGO/GTerm?id=GO:0006753
6	6	nucleoside monophosphate metabolic process	GO:0009123	6.18e-05	0.00279	AMPD3|1.306784743;GPI|1.354148803;ATP5F1|1.373436785;PGK1|1.22553449;ADSSL1|1.469655536;ENO3|1.243593921;HSP70|1.283172572;COX7C|1.254685321;ALDOC|1.365001997	9	312	121	21829	http://www.ebi.ac.uk/QuickGO/GTerm?id=GO:0009123
8	6,7,8	sarcomere organization	GO:0045214	8.54e-05	0.00376	KBTBD10|1.353350665;MYOM2|1.223302409;MYPN|1.223593919;MYBPC2|1.243510197	4	42	121	21829	http://www.ebi.ac.uk/QuickGO/GTerm?id=GO:0045214
11	9,10,11	calcium ion transmembrane transport via high voltage-gated calcium channel	GO:0061577	9.11e-05	0.00387	A0A3Q2TTX7|1.32240644;A0A3Q3ATJ1|1.201501275	2	3	121	21829	http://www.ebi.ac.uk/QuickGO/GTerm?id=GO:0061577
4	4	generation of precursor metabolites and energy	GO:0006091	9.26e-05	0.00387	ENO1|1.301513562;GPI|1.354148803;SDHA|1.217654696;PGK1|1.22553449;ENO3|1.243593921;COX7C|1.254685321;ALDOC|1.365001997;A0A3Q3AUQ1|0.818305002;PPP1CB|0.799006051	9	329	121	21829	http://www.ebi.ac.uk/QuickGO/GTerm?id=GO:0006091
6	6	ribonucleoside metabolic process	GO:0009119	9.73e-05	0.00397	AMPD3|1.306784743;GPI|1.354148803;ATP5F1|1.373436785;PGK1|1.22553449;ADSSL1|1.469655536;ENO3|1.243593921;ALDOC|1.365001997;PANK4|0.649364304	8	258	121	21829	http://www.ebi.ac.uk/QuickGO/GTerm?id=GO:0009119
7	6,7	striated muscle cell development	GO:0055002	0.000107	0.00428	KBTBD10|1.353350665;UCH-L1|1.43716929;LMOD3|1.522555731;MYOM2|1.223302409;MYPN|1.223593919;MYBPC2|1.243510197	6	135	121	21829	http://www.ebi.ac.uk/QuickGO/GTerm?id=GO:0055002
6	6	coenzyme biosynthetic process	GO:0009108	0.000112	0.00435	ENO1|1.301513562;A0A3Q2UEL1|1.305534201;ACAT1|1.26178047;PANK4|0.649364304;MTHFD1L|0.749713642;PBEF1|0.760519451	6	136	121	21829	http://www.ebi.ac.uk/QuickGO/GTerm?id=GO:0009108
8	7,8	nicotinamide nucleotide metabolic process	GO:0046496	0.000136	0.00507	ENO1|1.301513562;GPI|1.354148803;PGK1|1.22553449;ENO3|1.243593921;ALDOC|1.365001997;PBEF1|0.760519451	6	141	121	21829	http://www.ebi.ac.uk/QuickGO/GTerm?id=GO:0046496
7	6,7	pyridine nucleotide metabolic process	GO:0019362	0.000136	0.00507	ENO1|1.301513562;GPI|1.354148803;PGK1|1.22553449;ENO3|1.243593921;ALDOC|1.365001997;PBEF1|0.760519451	6	141	121	21829	http://www.ebi.ac.uk/QuickGO/GTerm?id=GO:0019362
9	6,8,9	glycolytic process	GO:0006096	0.000145	0.00525	ENO1|1.301513562;GPI|1.354148803;PGK1|1.22553449;ENO3|1.243593921;ALDOC|1.365001997	5	90	121	21829	http://www.ebi.ac.uk/QuickGO/GTerm?id=GO:0006096
4	4	organophosphate metabolic process	GO:0019637	0.000148	0.00525	IMPA1|1.338855168;ENO1|1.301513562;A0A3Q2UEL1|1.305534201;A0A3Q3AZP2|1.434367428;ACAT1|1.26178047;PRDX6|1.247143535;AMPD3|1.306784743;GPI|1.354148803;ATP5F1|1.373436785;PGK1|1.22553449;ADSSL1|1.469655536;ENO3|1.243593921;HSP70|1.283172572;COX7C|1.254685321;ALDOC|1.365001997;PANK4|0.649364304;PBEF1|0.760519451	17	1119	121	21829	http://www.ebi.ac.uk/QuickGO/GTerm?id=GO:0019637
10	5,9,10	ATP generation from ADP	GO:0006757	0.000153	0.00533	ENO1|1.301513562;GPI|1.354148803;PGK1|1.22553449;ENO3|1.243593921;ALDOC|1.365001997	5	91	121	21829	http://www.ebi.ac.uk/QuickGO/GTerm?id=GO:0006757
4	4	actin filament-based process	GO:0030029	0.000162	0.00551	KBTBD10|1.353350665;A0A3Q3ATJ1|1.201501275;LMOD3|1.522555731;PDLIM3|1.286425032;MYOM2|1.223302409;MYPN|1.223593919;ENSGALG00000002907|1.322866394;TPM1|1.390357267;MYBPC2|1.243510197;CAPZA2|1.308764545;ENSGALG00000027330|1.235499055;GMFB|0.703153051;FLNB|0.613099367	13	711	121	21829	http://www.ebi.ac.uk/QuickGO/GTerm?id=GO:0030029
6	6	nucleoside diphosphate metabolic process	GO:0009132	0.000165	0.00552	ENO1|1.301513562;AMPD3|1.306784743;GPI|1.354148803;PGK1|1.22553449;ENO3|1.243593921;ALDOC|1.365001997	6	146	121	21829	http://www.ebi.ac.uk/QuickGO/GTerm?id=GO:0009132
5	5	pyridine-containing compound metabolic process	GO:0072524	0.000178	0.00582	ENO1|1.301513562;GPI|1.354148803;PGK1|1.22553449;ENO3|1.243593921;ALDOC|1.365001997;PBEF1|0.760519451	6	148	121	21829	http://www.ebi.ac.uk/QuickGO/GTerm?id=GO:0072524
6	5,6	muscle cell development	GO:0055001	0.000198	0.00636	KBTBD10|1.353350665;UCH-L1|1.43716929;LMOD3|1.522555731;MYOM2|1.223302409;MYPN|1.223593919;MYBPC2|1.243510197	6	151	121	21829	http://www.ebi.ac.uk/QuickGO/GTerm?id=GO:0055001
9	9	calcium ion transport	GO:0006816	0.000202	0.00636	RYR3|1.208753681;ATP2B4|1.454010951;ATP2B2|1.385296881;A0A3Q2TTX7|1.32240644;CATSPER2|1.202421769;A0A3Q3ATJ1|1.201501275;ATP2A1|1.2337889;HSP70|1.283172572;FKBP12.6|0.773369444	9	365	121	21829	http://www.ebi.ac.uk/QuickGO/GTerm?id=GO:0006816
9	7,8,9	coenzyme A biosynthetic process	GO:0015937	0.000205	0.00636	A0A3Q2UEL1|1.305534201;ACAT1|1.26178047;PANK4|0.649364304	3	21	121	21829	http://www.ebi.ac.uk/QuickGO/GTerm?id=GO:0015937
6	6	striated muscle cell differentiation	GO:0051146	0.000236	0.00716	KBTBD10|1.353350665;UCH-L1|1.43716929;LMOD3|1.522555731;MYOM2|1.223302409;MYPN|1.223593919;SMYD1|1.332742776;MYBPC2|1.243510197	7	221	121	21829	http://www.ebi.ac.uk/QuickGO/GTerm?id=GO:0051146
5	5	extracellular matrix organization	GO:0030198	0.000243	0.00723	KBTBD10|1.353350665;LMOD3|1.522555731;PDLIM3|1.286425032;MYOM2|1.223302409;MYPN|1.223593919;TPM1|1.390357267;MYBPC2|1.243510197;CAPZA2|1.308764545;HSP70|1.283172572;ENSGALG00000027330|1.235499055;GMFB|0.703153051	11	549	121	21829	http://www.ebi.ac.uk/QuickGO/GTerm?id=GO:0030198
4	4	extracellular structure organization	GO:0043062	0.000247	0.00723	KBTBD10|1.353350665;LMOD3|1.522555731;PDLIM3|1.286425032;MYOM2|1.223302409;MYPN|1.223593919;TPM1|1.390357267;MYBPC2|1.243510197;CAPZA2|1.308764545;HSP70|1.283172572;ENSGALG00000027330|1.235499055;GMFB|0.703153051	11	550	121	21829	http://www.ebi.ac.uk/QuickGO/GTerm?id=GO:0043062
6	6	oxidoreduction coenzyme metabolic process	GO:0006733	0.000271	0.00743	ENO1|1.301513562;GPI|1.354148803;PGK1|1.22553449;ENO3|1.243593921;ALDOC|1.365001997;PBEF1|0.760519451	6	160	121	21829	http://www.ebi.ac.uk/QuickGO/GTerm?id=GO:0006733
7	7	purine nucleoside bisphosphate biosynthetic process	GO:0034033	0.000271	0.00743	A0A3Q2UEL1|1.305534201;ACAT1|1.26178047;PANK4|0.649364304	3	23	121	21829	http://www.ebi.ac.uk/QuickGO/GTerm?id=GO:0034033
8	7,8	ribonucleoside bisphosphate biosynthetic process	GO:0034030	0.000271	0.00743	A0A3Q2UEL1|1.305534201;ACAT1|1.26178047;PANK4|0.649364304	3	23	121	21829	http://www.ebi.ac.uk/QuickGO/GTerm?id=GO:0034030
7	6,7	nucleoside bisphosphate biosynthetic process	GO:0033866	0.000271	0.00743	A0A3Q2UEL1|1.305534201;ACAT1|1.26178047;PANK4|0.649364304	3	23	121	21829	http://www.ebi.ac.uk/QuickGO/GTerm?id=GO:0033866
8	7,8	muscle fiber development	GO:0048747	0.000283	0.00762	KBTBD10|1.353350665;UCH-L1|1.43716929;LMOD3|1.522555731;MYPN|1.223593919	4	57	121	21829	http://www.ebi.ac.uk/QuickGO/GTerm?id=GO:0048747
6	5,6	actin cytoskeleton organization	GO:0030036	0.00029	0.0077	KBTBD10|1.353350665;LMOD3|1.522555731;PDLIM3|1.286425032;MYOM2|1.223302409;MYPN|1.223593919;ENSGALG00000002907|1.322866394;TPM1|1.390357267;MYBPC2|1.243510197;CAPZA2|1.308764545;ENSGALG00000027330|1.235499055;GMFB|0.703153051;FLNB|0.613099367	12	656	121	21829	http://www.ebi.ac.uk/QuickGO/GTerm?id=GO:0030036
7	7	cellular response to beta-amyloid	GO:1904646	0.000301	0.00787	A0A3Q2TTX7|1.32240644;A0A3Q3ATJ1|1.201501275	2	5	121	21829	http://www.ebi.ac.uk/QuickGO/GTerm?id=GO:1904646
7	6,7	actomyosin structure organization	GO:0031032	0.000309	0.00795	KBTBD10|1.353350665;LMOD3|1.522555731;MYOM2|1.223302409;MYPN|1.223593919;MYBPC2|1.243510197;ENSGALG00000027330|1.235499055	6	164	121	21829	http://www.ebi.ac.uk/QuickGO/GTerm?id=GO:0031032
6	6	coenzyme A metabolic process	GO:0015936	0.000394	0.00982	A0A3Q2UEL1|1.305534201;ACAT1|1.26178047;PANK4|0.649364304	3	26	121	21829	http://www.ebi.ac.uk/QuickGO/GTerm?id=GO:0015936
6	6	purine-containing compound biosynthetic process	GO:0072522	0.000394	0.00982	ENO1|1.301513562;A0A3Q2UEL1|1.305534201;ACAT1|1.26178047;AMPD3|1.306784743;ATP5F1|1.373436785;ADSSL1|1.469655536;PANK4|0.649364304;MTHFD1L|0.749713642	8	317	121	21829	http://www.ebi.ac.uk/QuickGO/GTerm?id=GO:0072522
8	7,8	inorganic cation transmembrane transport	GO:0098662	0.000445	0.0109	RYR3|1.208753681;ATP2B4|1.454010951;ATP2B2|1.385296881;A0A3Q2TTX7|1.32240644;CATSPER2|1.202421769;A0A3Q3ATJ1|1.201501275;ATP5F1|1.373436785;ATP2A1|1.2337889;HSP70|1.283172572;COX7C|1.254685321;A0A3Q3AUQ1|0.818305002;FXYD6|0.766199089;FKBP12.6|0.773369444	13	790	121	21829	http://www.ebi.ac.uk/QuickGO/GTerm?id=GO:0098662
7	7	divalent inorganic cation transport	GO:0072511	0.000498	0.0119	RYR3|1.208753681;ATP2B4|1.454010951;ATP2B2|1.385296881;A0A3Q2TTX7|1.32240644;CATSPER2|1.202421769;A0A3Q3ATJ1|1.201501275;ATP2A1|1.2337889;HSP70|1.283172572;FKBP12.6|0.773369444	9	413	121	21829	http://www.ebi.ac.uk/QuickGO/GTerm?id=GO:0072511
8	8	divalent metal ion transport	GO:0070838	0.000498	0.0119	RYR3|1.208753681;ATP2B4|1.454010951;ATP2B2|1.385296881;A0A3Q2TTX7|1.32240644;CATSPER2|1.202421769;A0A3Q3ATJ1|1.201501275;ATP2A1|1.2337889;HSP70|1.283172572;FKBP12.6|0.773369444	9	413	121	21829	http://www.ebi.ac.uk/QuickGO/GTerm?id=GO:0070838
6	6	nucleoside bisphosphate metabolic process	GO:0033865	0.000605	0.0138	A0A3Q2UEL1|1.305534201;ACAT1|1.26178047;PANK4|0.649364304	3	30	121	21829	http://www.ebi.ac.uk/QuickGO/GTerm?id=GO:0033865
6	6	purine nucleoside bisphosphate metabolic process	GO:0034032	0.000605	0.0138	A0A3Q2UEL1|1.305534201;ACAT1|1.26178047;PANK4|0.649364304	3	30	121	21829	http://www.ebi.ac.uk/QuickGO/GTerm?id=GO:0034032
7	7	ribonucleoside bisphosphate metabolic process	GO:0033875	0.000605	0.0138	A0A3Q2UEL1|1.305534201;ACAT1|1.26178047;PANK4|0.649364304	3	30	121	21829	http://www.ebi.ac.uk/QuickGO/GTerm?id=GO:0033875
6	6	response to beta-amyloid	GO:1904645	0.000628	0.0142	A0A3Q2TTX7|1.32240644;A0A3Q3ATJ1|1.201501275	2	7	121	21829	http://www.ebi.ac.uk/QuickGO/GTerm?id=GO:1904645
7	7	nucleoside diphosphate phosphorylation	GO:0006165	0.000641	0.0143	ENO1|1.301513562;GPI|1.354148803;PGK1|1.22553449;ENO3|1.243593921;ALDOC|1.365001997	5	124	121	21829	http://www.ebi.ac.uk/QuickGO/GTerm?id=GO:0006165
9	8,9	regulation of calcium ion transmembrane transport	GO:1903169	0.000655	0.0144	A0A3Q2TTX7|1.32240644;A0A3Q3ATJ1|1.201501275;HSP70|1.283172572;FKBP12.6|0.773369444	4	71	121	21829	http://www.ebi.ac.uk/QuickGO/GTerm?id=GO:1903169
5	5	cofactor biosynthetic process	GO:0051188	0.000793	0.0172	ENO1|1.301513562;A0A3Q2UEL1|1.305534201;ACAT1|1.26178047;PANK4|0.649364304;MTHFD1L|0.749713642;PBEF1|0.760519451	6	196	121	21829	http://www.ebi.ac.uk/QuickGO/GTerm?id=GO:0051188
4	4	organonitrogen compound metabolic process	GO:1901564	0.00082	0.0176	DUSP3|1.289465091;ENO1|1.301513562;A0A3Q2U6J9|1.340342648;A0A3Q2UCH4|1.308620615;PTGES3|1.249959146;A0A3Q2UDT6|1.205693283;A0A3Q2UEL1|1.305534201;CAMK2D|1.395725167;A0A3Q3AZP2|1.434367428;UCH-L1|1.43716929;ACAT1|1.26178047;EIF3I|1.293629736;PSMD6|1.32702021;AMPD3|1.306784743;GPI|1.354148803;ATP5F1|1.373436785;NPEPL1|1.259782993;PGK1|1.22553449;ADSSL1|1.469655536;EEF1B2|1.322594905;HSPB1|1.3377744…	51	6205	121	21829	http://www.ebi.ac.uk/QuickGO/GTerm?id=GO:1901564
7	4,6,7	establishment of protein localization to mitochondrial membrane	GO:0090151	0.000835	0.0177	TIMM13|1.33072494;SAMM50|0.563408826	2	8	121	21829	http://www.ebi.ac.uk/QuickGO/GTerm?id=GO:0090151
5	5	carbohydrate catabolic process	GO:0016052	0.00088	0.0184	ENO1|1.301513562;GPI|1.354148803;PGK1|1.22553449;ENO3|1.243593921;ALDOC|1.365001997	5	133	121	21829	http://www.ebi.ac.uk/QuickGO/GTerm?id=GO:0016052
8	7,8	regulation of cation transmembrane transport	GO:1904062	0.000972	0.0201	A0A3Q2TTX7|1.32240644;A0A3Q3ATJ1|1.201501275;HSP70|1.283172572;FXYD6|0.766199089;FKBP12.6|0.773369444	5	136	121	21829	http://www.ebi.ac.uk/QuickGO/GTerm?id=GO:1904062
7	7	nucleotide phosphorylation	GO:0046939	0.00107	0.0218	ENO1|1.301513562;GPI|1.354148803;PGK1|1.22553449;ENO3|1.243593921;ALDOC|1.365001997	5	139	121	21829	http://www.ebi.ac.uk/QuickGO/GTerm?id=GO:0046939
9	8,9	purine ribonucleotide biosynthetic process	GO:0009152	0.00111	0.0222	ENO1|1.301513562;A0A3Q2UEL1|1.305534201;ACAT1|1.26178047;AMPD3|1.306784743;ATP5F1|1.373436785;ADSSL1|1.469655536;PANK4|0.649364304	7	287	121	21829	http://www.ebi.ac.uk/QuickGO/GTerm?id=GO:0009152
7	6,7	actin filament organization	GO:0007015	0.00112	0.0222	LMOD3|1.522555731;PDLIM3|1.286425032;MYOM2|1.223302409;TPM1|1.390357267;MYBPC2|1.243510197;CAPZA2|1.308764545;ENSGALG00000027330|1.235499055;GMFB|0.703153051	8	372	121	21829	http://www.ebi.ac.uk/QuickGO/GTerm?id=GO:0007015
7	6,7	inorganic ion transmembrane transport	GO:0098660	0.00132	0.0257	RYR3|1.208753681;ATP2B4|1.454010951;ATP2B2|1.385296881;A0A3Q2TTX7|1.32240644;CATSPER2|1.202421769;A0A3Q3ATJ1|1.201501275;ATP5F1|1.373436785;ATP2A1|1.2337889;HSP70|1.283172572;COX7C|1.254685321;A0A3Q3AUQ1|0.818305002;FXYD6|0.766199089;FKBP12.6|0.773369444	13	889	121	21829	http://www.ebi.ac.uk/QuickGO/GTerm?id=GO:0098660
5	5	striated muscle myosin thick filament assembly	GO:0071688	0.00133	0.0257	MYOM2|1.223302409;MYBPC2|1.243510197	2	10	121	21829	http://www.ebi.ac.uk/QuickGO/GTerm?id=GO:0071688
7	6,7	cation transmembrane transport	GO:0098655	0.00134	0.0257	RYR3|1.208753681;ATP2B4|1.454010951;ATP2B2|1.385296881;A0A3Q2TTX7|1.32240644;CATSPER2|1.202421769;A0A3Q3ATJ1|1.201501275;ATP5F1|1.373436785;ATP2A1|1.2337889;HSP70|1.283172572;COX7C|1.254685321;A0A3Q3AUQ1|0.818305002;FXYD6|0.766199089;FKBP12.6|0.773369444	13	891	121	21829	http://www.ebi.ac.uk/QuickGO/GTerm?id=GO:0098655
7	7	purine nucleotide biosynthetic process	GO:0006164	0.00136	0.0257	ENO1|1.301513562;A0A3Q2UEL1|1.305534201;ACAT1|1.26178047;AMPD3|1.306784743;ATP5F1|1.373436785;ADSSL1|1.469655536;PANK4|0.649364304	7	297	121	21829	http://www.ebi.ac.uk/QuickGO/GTerm?id=GO:0006164
8	7,8	ribonucleotide biosynthetic process	GO:0009260	0.00173	0.0325	ENO1|1.301513562;A0A3Q2UEL1|1.305534201;ACAT1|1.26178047;AMPD3|1.306784743;ATP5F1|1.373436785;ADSSL1|1.469655536;PANK4|0.649364304	7	310	121	21829	http://www.ebi.ac.uk/QuickGO/GTerm?id=GO:0009260
6	6	ribose phosphate biosynthetic process	GO:0046390	0.00176	0.0327	ENO1|1.301513562;A0A3Q2UEL1|1.305534201;ACAT1|1.26178047;AMPD3|1.306784743;ATP5F1|1.373436785;ADSSL1|1.469655536;PANK4|0.649364304	7	311	121	21829	http://www.ebi.ac.uk/QuickGO/GTerm?id=GO:0046390
5	5	phosphate-containing compound metabolic process	GO:0006796	0.00189	0.0348	IMPA1|1.338855168;DUSP3|1.289465091;ENO1|1.301513562;A0A3Q2UCH4|1.308620615;PTGES3|1.249959146;A0A3Q2UEL1|1.305534201;CAMK2D|1.395725167;A0A3Q3AZP2|1.434367428;UCH-L1|1.43716929;ACAT1|1.26178047;PRDX6|1.247143535;AMPD3|1.306784743;GPI|1.354148803;ATP5F1|1.373436785;PGK1|1.22553449;ADSSL1|1.469655536;HSPB1|1.337774448;CKM|1.28135235;ENO3|1.243593921;HSP70|1.283172572;CAB39|1.21239245;COX7C|1.25468…	32	3458	121	21829	http://www.ebi.ac.uk/QuickGO/GTerm?id=GO:0006796
5	5	muscle cell differentiation	GO:0042692	0.00214	0.0389	KBTBD10|1.353350665;UCH-L1|1.43716929;LMOD3|1.522555731;MYOM2|1.223302409;MYPN|1.223593919;SMYD1|1.332742776;MYBPC2|1.243510197	7	322	121	21829	http://www.ebi.ac.uk/QuickGO/GTerm?id=GO:0042692
4	4	phosphorus metabolic process	GO:0006793	0.00232	0.0416	IMPA1|1.338855168;DUSP3|1.289465091;ENO1|1.301513562;A0A3Q2UCH4|1.308620615;PTGES3|1.249959146;A0A3Q2UEL1|1.305534201;CAMK2D|1.395725167;A0A3Q3AZP2|1.434367428;UCH-L1|1.43716929;ACAT1|1.26178047;PRDX6|1.247143535;AMPD3|1.306784743;GPI|1.354148803;ATP5F1|1.373436785;PGK1|1.22553449;ADSSL1|1.469655536;HSPB1|1.337774448;CKM|1.28135235;ENO3|1.243593921;HSP70|1.283172572;CAB39|1.21239245;COX7C|1.25468…	32	3501	121	21829	http://www.ebi.ac.uk/QuickGO/GTerm?id=GO:0006793
7	6,7	nucleotide biosynthetic process	GO:0009165	0.00257	0.0456	ENO1|1.301513562;A0A3Q2UEL1|1.305534201;ACAT1|1.26178047;AMPD3|1.306784743;ATP5F1|1.373436785;ADSSL1|1.469655536;PANK4|0.649364304;PBEF1|0.760519451	8	425	121	21829	http://www.ebi.ac.uk/QuickGO/GTerm?id=GO:0009165
6	5,6	nucleoside phosphate biosynthetic process	GO:1901293	0.00292	0.0513	ENO1|1.301513562;A0A3Q2UEL1|1.305534201;ACAT1|1.26178047;AMPD3|1.306784743;ATP5F1|1.373436785;ADSSL1|1.469655536;PANK4|0.649364304;PBEF1|0.760519451	8	434	121	21829	http://www.ebi.ac.uk/QuickGO/GTerm?id=GO:1901293
4	4	carbohydrate derivative metabolic process	GO:1901135	0.00306	0.0532	ENO1|1.301513562;A0A3Q2UEL1|1.305534201;ACAT1|1.26178047;AMPD3|1.306784743;GPI|1.354148803;ATP5F1|1.373436785;PGK1|1.22553449;ADSSL1|1.469655536;ENO3|1.243593921;OARD1|1.518785107;HSP70|1.283172572;COX7C|1.254685321;ALDOC|1.365001997;ERP44|0.745186445;PANK4|0.649364304	15	1219	121	21829	http://www.ebi.ac.uk/QuickGO/GTerm?id=GO:1901135
6	4,5,6	cell redox homeostasis	GO:0045454	0.00319	0.055	TXNRD3|1.204580616;PRDX6|1.247143535;ERP44|0.745186445;GLRX5|0.502973712	4	109	121	21829	http://www.ebi.ac.uk/QuickGO/GTerm?id=GO:0045454
6	6	cellular macromolecular complex assembly	GO:0034622	0.00371	0.0633	PSMD11|1.440547778;LMOD3|1.522555731;EIF3I|1.293629736;MYOM2|1.223302409;ENSGALG00000002907|1.322866394;MYBPC2|1.243510197;CAPZA2|1.308764545;GMFB|0.703153051;SAMM50|0.563408826;P08286|0.677683947;FGB|0.807555904;HP1BP3|0.72359077	12	884	121	21829	http://www.ebi.ac.uk/QuickGO/GTerm?id=GO:0034622
8	7,8	acetyl-CoA biosynthetic process	GO:0006085	0.00392	0.0662	A0A3Q2UEL1|1.305534201;ACAT1|1.26178047	2	17	121	21829	http://www.ebi.ac.uk/QuickGO/GTerm?id=GO:0006085
9	8,9	AMP metabolic process	GO:0046033	0.0049	0.0792	AMPD3|1.306784743;ADSSL1|1.469655536	2	19	121	21829	http://www.ebi.ac.uk/QuickGO/GTerm?id=GO:0046033
5	5	single-organism carbohydrate catabolic process	GO:0044724	0.0055	0.0792	GPI|1.354148803;PGK1|1.22553449;ENO3|1.243593921;ALDOC|1.365001997	4	127	121	21829	http://www.ebi.ac.uk/QuickGO/GTerm?id=GO:0044724
10	6,8,9,10	anterograde axonal protein transport	GO:0099641	0.00554	0.0792	HSPB1|1.337774448	1	1	121	21829	http://www.ebi.ac.uk/QuickGO/GTerm?id=GO:0099641
9	8,9	myosin II filament assembly	GO:0031036	0.00554	0.0792	ENSGALG00000002907|1.322866394	1	1	121	21829	http://www.ebi.ac.uk/QuickGO/GTerm?id=GO:0031036
13	6,7,8,9,11,12,13	positive regulation of cyclin-dependent protein serine/threonine kinase activity involved in G2/M transition of mitotic cell cycle	GO:0031662	0.00554	0.0792	HSP70|1.283172572	1	1	121	21829	http://www.ebi.ac.uk/QuickGO/GTerm?id=GO:0031662
10	5,6,9,10	regulation of myosin II filament assembly	GO:0043520	0.00554	0.0792	ENSGALG00000002907|1.322866394	1	1	121	21829	http://www.ebi.ac.uk/QuickGO/GTerm?id=GO:0043520
12	6,8,10,11,12	positive regulation of fast-twitch skeletal muscle fiber contraction	GO:0031448	0.00554	0.0792	ATP2A1|1.2337889	1	1	121	21829	http://www.ebi.ac.uk/QuickGO/GTerm?id=GO:0031448
10	8,9,10	regulation of twitch skeletal muscle contraction	GO:0014724	0.00554	0.0792	ATP2A1|1.2337889	1	1	121	21829	http://www.ebi.ac.uk/QuickGO/GTerm?id=GO:0014724
5	5	response to vitamin E	GO:0033197	0.00554	0.0792	FKBP12.6|0.773369444	1	1	121	21829	http://www.ebi.ac.uk/QuickGO/GTerm?id=GO:0033197
7	6,7	propionyl-CoA metabolic process	GO:1902858	0.00554	0.0792	ACAT1|1.26178047	1	1	121	21829	http://www.ebi.ac.uk/QuickGO/GTerm?id=GO:1902858
12	7,8,10,11,12	regulation of cyclin-dependent protein serine/threonine kinase activity involved in G2/M transition of mitotic cell cycle	GO:0031660	0.00554	0.0792	HSP70|1.283172572	1	1	121	21829	http://www.ebi.ac.uk/QuickGO/GTerm?id=GO:0031660
11	9,10,11	regulation of fast-twitch skeletal muscle fiber contraction	GO:0031446	0.00554	0.0792	ATP2A1|1.2337889	1	1	121	21829	http://www.ebi.ac.uk/QuickGO/GTerm?id=GO:0031446
8	7,8	propionyl-CoA biosynthetic process	GO:1902860	0.00554	0.0792	ACAT1|1.26178047	1	1	121	21829	http://www.ebi.ac.uk/QuickGO/GTerm?id=GO:1902860
7	7	isoleucine catabolic process	GO:0006550	0.00554	0.0792	ACAT1|1.26178047	1	1	121	21829	http://www.ebi.ac.uk/QuickGO/GTerm?id=GO:0006550
9	7,8,9	axo-dendritic protein transport	GO:0099640	0.00554	0.0792	HSPB1|1.337774448	1	1	121	21829	http://www.ebi.ac.uk/QuickGO/GTerm?id=GO:0099640
8	8	membrane depolarization during bundle of His cell action potential	GO:0086048	0.00554	0.0792	A0A3Q3ATJ1|1.201501275	1	1	121	21829	http://www.ebi.ac.uk/QuickGO/GTerm?id=GO:0086048
6	6	isoleucine metabolic process	GO:0006549	0.00554	0.0792	ACAT1|1.26178047	1	1	121	21829	http://www.ebi.ac.uk/QuickGO/GTerm?id=GO:0006549
7	7	regulation of mitophagy in response to mitochondrial depolarization	GO:1904923	0.00554	0.0792	A0A3Q2UCH4|1.308620615	1	1	121	21829	http://www.ebi.ac.uk/QuickGO/GTerm?id=GO:1904923
4	4	muscle structure development	GO:0061061	0.0056	0.0793	KBTBD10|1.353350665;UCH-L1|1.43716929;LMOD3|1.522555731;MYOM2|1.223302409;MYPN|1.223593919;SMYD1|1.332742776;MYBPC2|1.243510197;FLNB|0.613099367	8	484	121	21829	http://www.ebi.ac.uk/QuickGO/GTerm?id=GO:0061061
7	6,7	regulation of fibril organization	GO:1902903	0.00574	0.0806	LMOD3|1.522555731;CAPZA2|1.308764545;HSP70|1.283172572;ENSGALG00000027330|1.235499055;GMFB|0.703153051	5	205	121	21829	http://www.ebi.ac.uk/QuickGO/GTerm?id=GO:1902903
7	7	regulation of striated muscle contraction	GO:0006942	0.0059	0.0821	TNNT3|1.527716062;ATP2A1|1.2337889;FKBP12.6|0.773369444	3	66	121	21829	http://www.ebi.ac.uk/QuickGO/GTerm?id=GO:0006942
8	6,8	regulation of metal ion transport	GO:0010959	0.0066	0.0911	A0A3Q2TTX7|1.32240644;A0A3Q3ATJ1|1.201501275;HSP70|1.283172572;FXYD6|0.766199089;FKBP12.6|0.773369444	5	212	121	21829	http://www.ebi.ac.uk/QuickGO/GTerm?id=GO:0010959
5	5	response to vitamin	GO:0033273	0.00714	0.0958	ALB|1.487005807;FKBP12.6|0.773369444	2	23	121	21829	http://www.ebi.ac.uk/QuickGO/GTerm?id=GO:0033273
7	6,7	inner mitochondrial membrane organization	GO:0007007	0.00714	0.0958	TIMM13|1.33072494;SAMM50|0.563408826	2	23	121	21829	http://www.ebi.ac.uk/QuickGO/GTerm?id=GO:0007007
8	7,8	positive regulation of myotube differentiation	GO:0010831	0.00714	0.0958	LMOD3|1.522555731;SMYD1|1.332742776	2	23	121	21829	http://www.ebi.ac.uk/QuickGO/GTerm?id=GO:0010831
9	7,9	regulation of calcium ion transport	GO:0051924	0.00716	0.0958	A0A3Q2TTX7|1.32240644;A0A3Q3ATJ1|1.201501275;HSP70|1.283172572;FKBP12.6|0.773369444	4	137	121	21829	http://www.ebi.ac.uk/QuickGO/GTerm?id=GO:0051924
7	6,7	peptide transport	GO:0015833	0.00773	0.101	GPI|1.354148803;HSPB1|1.337774448;RANBP1|1.340088175;KPNA4|1.24977891;RAB5C|2.549741805;TIMM13|1.33072494;BCAP31|0.807755804;VPS29|0.751790268;A0A3Q2U769|0.584188784;SAMM50|0.563408826;KPNA3|0.806756534;PRKCA|0.487532754;FKBP12.6|0.773369444	13	1095	121	21829	http://www.ebi.ac.uk/QuickGO/GTerm?id=GO:0015833
9	8,9	nicotinamide nucleotide biosynthetic process	GO:0019359	0.00777	0.101	ENO1|1.301513562;PBEF1|0.760519451	2	24	121	21829	http://www.ebi.ac.uk/QuickGO/GTerm?id=GO:0019359
8	7,8	pyridine nucleotide biosynthetic process	GO:0019363	0.00777	0.101	ENO1|1.301513562;PBEF1|0.760519451	2	24	121	21829	http://www.ebi.ac.uk/QuickGO/GTerm?id=GO:0019363
4	4	small molecule metabolic process	GO:0044281	0.00781	0.101	IMPA1|1.338855168;ENO1|1.301513562;A0A3Q2UEL1|1.305534201;ACAT1|1.26178047;AMPD3|1.306784743;GPI|1.354148803;SDHA|1.217654696;ATP5F1|1.373436785;PGK1|1.22553449;ADSSL1|1.469655536;LDHA|1.406541698;ENO3|1.243593921;BLMH|1.469427111;OARD1|1.518785107;HSP70|1.283172572;COX7C|1.254685321;ALDOC|1.365001997;PANK4|0.649364304;MTHFD1L|0.749713642;PBEF1|0.760519451	20	2025	121	21829	http://www.ebi.ac.uk/QuickGO/GTerm?id=GO:0044281
5	4,5	electron transport chain	GO:0022900	0.00809	0.104	SDHA|1.217654696;COX7C|1.254685321;A0A3Q3AUQ1|0.818305002	3	74	121	21829	http://www.ebi.ac.uk/QuickGO/GTerm?id=GO:0022900
6	5,6	regulation of extracellular matrix organization	GO:1903053	0.00827	0.105	LMOD3|1.522555731;CAPZA2|1.308764545;HSP70|1.283172572;ENSGALG00000027330|1.235499055;GMFB|0.703153051	5	224	121	21829	http://www.ebi.ac.uk/QuickGO/GTerm?id=GO:1903053
7	6,7	acyl-CoA biosynthetic process	GO:0071616	0.00841	0.106	A0A3Q2UEL1|1.305534201;ACAT1|1.26178047	2	25	121	21829	http://www.ebi.ac.uk/QuickGO/GTerm?id=GO:0071616
5	5	thioester biosynthetic process	GO:0035384	0.00841	0.106	A0A3Q2UEL1|1.305534201;ACAT1|1.26178047	2	25	121	21829	http://www.ebi.ac.uk/QuickGO/GTerm?id=GO:0035384
4	4	response to toxic substance	GO:0009636	0.00892	0.11	TXNRD3|1.204580616;PRDX6|1.247143535;BLMH|1.469427111;MBP|0.690656099	4	146	121	21829	http://www.ebi.ac.uk/QuickGO/GTerm?id=GO:0009636
5	5	protein complex subunit organization	GO:0071822	0.00897	0.11	LMOD3|1.522555731;PDLIM3|1.286425032;MYOM2|1.223302409;ENSGALG00000002907|1.322866394;MYBPC2|1.243510197;CAPZA2|1.308764545;RANBP1|1.340088175;ENSGALG00000027330|1.235499055;GMFB|0.703153051;SAMM50|0.563408826;LOC100859860|0.744437258;P08286|0.677683947;FGB|0.807555904;SUB1|0.814720615;HP1BP3|0.72359077	15	1373	121	21829	http://www.ebi.ac.uk/QuickGO/GTerm?id=GO:0071822
6	6	amide transport	GO:0042886	0.00905	0.11	GPI|1.354148803;HSPB1|1.337774448;RANBP1|1.340088175;KPNA4|1.24977891;RAB5C|2.549741805;TIMM13|1.33072494;BCAP31|0.807755804;VPS29|0.751790268;A0A3Q2U769|0.584188784;SAMM50|0.563408826;KPNA3|0.806756534;PRKCA|0.487532754;FKBP12.6|0.773369444	13	1117	121	21829	http://www.ebi.ac.uk/QuickGO/GTerm?id=GO:0042886
9	8,9	IMP metabolic process	GO:0046040	0.00908	0.11	AMPD3|1.306784743;ADSSL1|1.469655536	2	26	121	21829	http://www.ebi.ac.uk/QuickGO/GTerm?id=GO:0046040
5	5	sulfur compound catabolic process	GO:0044273	0.00908	0.11	ACAT1|1.26178047;BLMH|1.469427111	2	26	121	21829	http://www.ebi.ac.uk/QuickGO/GTerm?id=GO:0044273
7	6,7	acetyl-CoA metabolic process	GO:0006084	0.00977	0.113	A0A3Q2UEL1|1.305534201;ACAT1|1.26178047	2	27	121	21829	http://www.ebi.ac.uk/QuickGO/GTerm?id=GO:0006084
7	6,7	cellular protein complex assembly	GO:0043623	0.00985	0.113	LMOD3|1.522555731;MYOM2|1.223302409;ENSGALG00000002907|1.322866394;MYBPC2|1.243510197;CAPZA2|1.308764545;GMFB|0.703153051;SAMM50|0.563408826;FGB|0.807555904	8	534	121	21829	http://www.ebi.ac.uk/QuickGO/GTerm?id=GO:0043623
7	7	skeletal muscle tissue development	GO:0007519	0.01	0.113	KBTBD10|1.353350665;LMOD3|1.522555731;SMYD1|1.332742776;FLNB|0.613099367	4	151	121	21829	http://www.ebi.ac.uk/QuickGO/GTerm?id=GO:0007519
4	4	response to nutrient	GO:0007584	0.0105	0.113	ALB|1.487005807;FKBP12.6|0.773369444	2	28	121	21829	http://www.ebi.ac.uk/QuickGO/GTerm?id=GO:0007584
7	7	cardiac muscle contraction	GO:0060048	0.0107	0.113	A0A3Q3ATJ1|1.201501275;TPM1|1.390357267;FKBP12.6|0.773369444	3	82	121	21829	http://www.ebi.ac.uk/QuickGO/GTerm?id=GO:0060048
6	6	bradykinin catabolic process	GO:0010815	0.0111	0.113	XPNPEP1|0.544019076	1	2	121	21829	http://www.ebi.ac.uk/QuickGO/GTerm?id=GO:0010815
9	8,9	error-free postreplication DNA repair	GO:0042275	0.0111	0.113	UBE2V2|1.250642582	1	2	121	21829	http://www.ebi.ac.uk/QuickGO/GTerm?id=GO:0042275
10	9,10	fast-twitch skeletal muscle fiber contraction	GO:0031443	0.0111	0.113	ATP2A1|1.2337889	1	2	121	21829	http://www.ebi.ac.uk/QuickGO/GTerm?id=GO:0031443
10	6,7,9,10	hemolysis by symbiont of host erythrocytes	GO:0019836	0.0111	0.113	ALB|1.487005807	1	2	121	21829	http://www.ebi.ac.uk/QuickGO/GTerm?id=GO:0019836
7	6,7	homocysteine catabolic process	GO:0043418	0.0111	0.113	BLMH|1.469427111	1	2	121	21829	http://www.ebi.ac.uk/QuickGO/GTerm?id=GO:0043418
7	5,6,7	synaptonemal complex disassembly	GO:0070194	0.0111	0.113	HSP70|1.283172572	1	2	121	21829	http://www.ebi.ac.uk/QuickGO/GTerm?id=GO:0070194
8	7,8	voluntary skeletal muscle contraction	GO:0003010	0.0111	0.113	ATP2A1|1.2337889	1	2	121	21829	http://www.ebi.ac.uk/QuickGO/GTerm?id=GO:0003010
5	5	ketone body catabolic process	GO:0046952	0.0111	0.113	ACAT1|1.26178047	1	2	121	21829	http://www.ebi.ac.uk/QuickGO/GTerm?id=GO:0046952
5	5	hemolysis in other organism involved in symbiotic interaction	GO:0052331	0.0111	0.113	ALB|1.487005807	1	2	121	21829	http://www.ebi.ac.uk/QuickGO/GTerm?id=GO:0052331
9	8,9	twitch skeletal muscle contraction	GO:0014721	0.0111	0.113	ATP2A1|1.2337889	1	2	121	21829	http://www.ebi.ac.uk/QuickGO/GTerm?id=GO:0014721
7	6,7	cellular sphingolipid homeostasis	GO:0090156	0.0111	0.113	ORMDL3|0.402916918	1	2	121	21829	http://www.ebi.ac.uk/QuickGO/GTerm?id=GO:0090156
9	8,9	10-formyltetrahydrofolate biosynthetic process	GO:0009257	0.0111	0.113	MTHFD1L|0.749713642	1	2	121	21829	http://www.ebi.ac.uk/QuickGO/GTerm?id=GO:0009257
5	5	hemolysis in other organism	GO:0044179	0.0111	0.113	ALB|1.487005807	1	2	121	21829	http://www.ebi.ac.uk/QuickGO/GTerm?id=GO:0044179
9	8,9	pyruvate biosynthetic process	GO:0042866	0.0111	0.113	ENO1|1.301513562	1	2	121	21829	http://www.ebi.ac.uk/QuickGO/GTerm?id=GO:0042866
9	6,8,9	cytolysis by symbiont of host cells	GO:0001897	0.0111	0.113	ALB|1.487005807	1	2	121	21829	http://www.ebi.ac.uk/QuickGO/GTerm?id=GO:0001897
6	5,6	maintenance of mitochondrion location	GO:0051659	0.0111	0.113	ALB|1.487005807	1	2	121	21829	http://www.ebi.ac.uk/QuickGO/GTerm?id=GO:0051659
7	7	protein de-ADP-ribosylation	GO:0051725	0.0111	0.113	ADPRH|0.719227667	1	2	121	21829	http://www.ebi.ac.uk/QuickGO/GTerm?id=GO:0051725
7	7	myosin II filament organization	GO:0031038	0.0111	0.113	ENSGALG00000002907|1.322866394	1	2	121	21829	http://www.ebi.ac.uk/QuickGO/GTerm?id=GO:0031038
9	6,7,8,9	negative regulation of ceramide biosynthetic process	GO:1900060	0.0111	0.113	ORMDL3|0.402916918	1	2	121	21829	http://www.ebi.ac.uk/QuickGO/GTerm?id=GO:1900060
7	6,7	regulation of myosin II filament organization	GO:0043519	0.0111	0.113	ENSGALG00000002907|1.322866394	1	2	121	21829	http://www.ebi.ac.uk/QuickGO/GTerm?id=GO:0043519
8	5,7,8	acetyl-CoA catabolic process	GO:0046356	0.0111	0.113	ACAT1|1.26178047	1	2	121	21829	http://www.ebi.ac.uk/QuickGO/GTerm?id=GO:0046356
5	5	heart process	GO:0003015	0.0112	0.113	A0A3Q2UEL1|1.305534201;A0A3Q3ATJ1|1.201501275;TPM1|1.390357267;FKBP12.6|0.773369444	4	156	121	21829	http://www.ebi.ac.uk/QuickGO/GTerm?id=GO:0003015
6	6	regulation of cytoskeleton organization	GO:0051493	0.0113	0.114	LMOD3|1.522555731;MYPN|1.223593919;ENSGALG00000002907|1.322866394;CAPZA2|1.308764545;RANBP1|1.340088175;ENSGALG00000027330|1.235499055;GMFB|0.703153051	7	439	121	21829	http://www.ebi.ac.uk/QuickGO/GTerm?id=GO:0051493
6	6	skeletal muscle organ development	GO:0060538	0.0119	0.119	KBTBD10|1.353350665;LMOD3|1.522555731;SMYD1|1.332742776;FLNB|0.613099367	4	159	121	21829	http://www.ebi.ac.uk/QuickGO/GTerm?id=GO:0060538
7	5,6,7	mitochondrial transmembrane transport	GO:1990542	0.012	0.119	TIMM13|1.33072494;SAMM50|0.563408826	2	30	121	21829	http://www.ebi.ac.uk/QuickGO/GTerm?id=GO:1990542
7	5,6,7	protein import	GO:0017038	0.0125	0.123	RANBP1|1.340088175;KPNA4|1.24977891;TIMM13|1.33072494;SAMM50|0.563408826;KPNA3|0.806756534	5	248	121	21829	http://www.ebi.ac.uk/QuickGO/GTerm?id=GO:0017038
7	6,7	negative regulation of fibril organization	GO:1902904	0.0126	0.123	LMOD3|1.522555731;CAPZA2|1.308764545;HSP70|1.283172572	3	87	121	21829	http://www.ebi.ac.uk/QuickGO/GTerm?id=GO:1902904
6	6	pyridine-containing compound biosynthetic process	GO:0072525	0.0128	0.124	ENO1|1.301513562;PBEF1|0.760519451	2	31	121	21829	http://www.ebi.ac.uk/QuickGO/GTerm?id=GO:0072525
5	5	cytoskeleton organization	GO:0007010	0.0128	0.124	KBTBD10|1.353350665;LMOD3|1.522555731;PDLIM3|1.286425032;MYOM2|1.223302409;MYPN|1.223593919;ENSGALG00000002907|1.322866394;TPM1|1.390357267;MYBPC2|1.243510197;CAPZA2|1.308764545;RANBP1|1.340088175;SH3KBP1|1.234699811;ENSGALG00000027330|1.235499055;GMFB|0.703153051;FLNB|0.613099367;DPYSL2|0.795640031	15	1431	121	21829	http://www.ebi.ac.uk/QuickGO/GTerm?id=GO:0007010
7	7	myotube differentiation	GO:0014902	0.013	0.125	KBTBD10|1.353350665;LMOD3|1.522555731;SMYD1|1.332742776	3	88	121	21829	http://www.ebi.ac.uk/QuickGO/GTerm?id=GO:0014902
7	7	monocarboxylic acid metabolic process	GO:0032787	0.0132	0.127	ENO1|1.301513562;ACAT1|1.26178047;GPI|1.354148803;PGK1|1.22553449;LDHA|1.406541698;ENO3|1.243593921;ALDOC|1.365001997	7	453	121	21829	http://www.ebi.ac.uk/QuickGO/GTerm?id=GO:0032787
7	5,6,7	negative regulation of extracellular matrix organization	GO:1903054	0.0138	0.131	LMOD3|1.522555731;CAPZA2|1.308764545;HSP70|1.283172572	3	90	121	21829	http://www.ebi.ac.uk/QuickGO/GTerm?id=GO:1903054
8	7,8	axo-dendritic transport	GO:0008088	0.0144	0.137	UCH-L1|1.43716929;HSPB1|1.337774448	2	33	121	21829	http://www.ebi.ac.uk/QuickGO/GTerm?id=GO:0008088
6	6	cation transport	GO:0006812	0.0149	0.141	RYR3|1.208753681;ATP2B4|1.454010951;ATP2B2|1.385296881;A0A3Q2TTX7|1.32240644;CATSPER2|1.202421769;A0A3Q3ATJ1|1.201501275;ATP5F1|1.373436785;ATP2A1|1.2337889;HSP70|1.283172572;COX7C|1.254685321;A0A3Q3AUQ1|0.818305002;FXYD6|0.766199089;FKBP12.6|0.773369444	13	1192	121	21829	http://www.ebi.ac.uk/QuickGO/GTerm?id=GO:0006812
8	8	skeletal muscle fiber development	GO:0048741	0.0161	0.147	KBTBD10|1.353350665;LMOD3|1.522555731	2	35	121	21829	http://www.ebi.ac.uk/QuickGO/GTerm?id=GO:0048741
5	5	fatty acid derivative catabolic process	GO:1901569	0.0165	0.147	ACAT1|1.26178047	1	3	121	21829	http://www.ebi.ac.uk/QuickGO/GTerm?id=GO:1901569
4	4	axon target recognition	GO:0007412	0.0165	0.147	UCH-L1|1.43716929	1	3	121	21829	http://www.ebi.ac.uk/QuickGO/GTerm?id=GO:0007412
8	7,8	regulation of macromitophagy	GO:1901524	0.0165	0.147	A0A3Q2UCH4|1.308620615	1	3	121	21829	http://www.ebi.ac.uk/QuickGO/GTerm?id=GO:1901524
7	6,7	disruption by symbiont of host cell	GO:0044004	0.0165	0.147	ALB|1.487005807	1	3	121	21829	http://www.ebi.ac.uk/QuickGO/GTerm?id=GO:0044004
9	6,7,8,9	positive regulation of endothelial cell chemotaxis by VEGF-activated vascular endothelial growth factor receptor signaling pathway	GO:0038033	0.0165	0.147	HSPB1|1.337774448	1	3	121	21829	http://www.ebi.ac.uk/QuickGO/GTerm?id=GO:0038033
8	5,7,8	killing by symbiont of host cells	GO:0001907	0.0165	0.147	ALB|1.487005807	1	3	121	21829	http://www.ebi.ac.uk/QuickGO/GTerm?id=GO:0001907
5	5	cytolysis in other organism involved in symbiotic interaction	GO:0051801	0.0165	0.147	ALB|1.487005807	1	3	121	21829	http://www.ebi.ac.uk/QuickGO/GTerm?id=GO:0051801
7	6,7	positive regulation of immunoglobulin secretion	GO:0051024	0.0165	0.147	GPI|1.354148803	1	3	121	21829	http://www.ebi.ac.uk/QuickGO/GTerm?id=GO:0051024
6	6	response to vitamin A	GO:0033189	0.0165	0.147	ALB|1.487005807	1	3	121	21829	http://www.ebi.ac.uk/QuickGO/GTerm?id=GO:0033189
8	7,8	positive regulation of calcium-transporting ATPase activity	GO:1901896	0.0165	0.147	HSP70|1.283172572	1	3	121	21829	http://www.ebi.ac.uk/QuickGO/GTerm?id=GO:1901896
7	6,7	regulation of ion transmembrane transport	GO:0034765	0.017	0.15	A0A3Q2TTX7|1.32240644;CATSPER2|1.202421769;A0A3Q3ATJ1|1.201501275;HSP70|1.283172572;FXYD6|0.766199089;FKBP12.6|0.773369444	6	369	121	21829	http://www.ebi.ac.uk/QuickGO/GTerm?id=GO:0034765
4	4	cellular component assembly involved in morphogenesis	GO:0010927	0.0171	0.151	KBTBD10|1.353350665;LMOD3|1.522555731;MYOM2|1.223302409;MYPN|1.223593919;MYBPC2|1.243510197	5	269	121	21829	http://www.ebi.ac.uk/QuickGO/GTerm?id=GO:0010927
5	5	substantia nigra development	GO:0021762	0.0179	0.156	ATP5F1|1.373436785;MBP|0.690656099	2	37	121	21829	http://www.ebi.ac.uk/QuickGO/GTerm?id=GO:0021762
6	5,6	protein complex assembly	GO:0006461	0.0185	0.16	LMOD3|1.522555731;MYOM2|1.223302409;ENSGALG00000002907|1.322866394;MYBPC2|1.243510197;CAPZA2|1.308764545;GMFB|0.703153051;SAMM50|0.563408826;LOC100859860|0.744437258;P08286|0.677683947;FGB|0.807555904;SUB1|0.814720615;HP1BP3|0.72359077	12	1095	121	21829	http://www.ebi.ac.uk/QuickGO/GTerm?id=GO:0006461
4	4	protein complex biogenesis	GO:0070271	0.0185	0.16	LMOD3|1.522555731;MYOM2|1.223302409;ENSGALG00000002907|1.322866394;MYBPC2|1.243510197;CAPZA2|1.308764545;GMFB|0.703153051;SAMM50|0.563408826;LOC100859860|0.744437258;P08286|0.677683947;FGB|0.807555904;SUB1|0.814720615;HP1BP3|0.72359077	12	1095	121	21829	http://www.ebi.ac.uk/QuickGO/GTerm?id=GO:0070271
5	5	organophosphate biosynthetic process	GO:0090407	0.0188	0.162	ENO1|1.301513562;A0A3Q2UEL1|1.305534201;ACAT1|1.26178047;AMPD3|1.306784743;ATP5F1|1.373436785;ADSSL1|1.469655536;PANK4|0.649364304;PBEF1|0.760519451	8	601	121	21829	http://www.ebi.ac.uk/QuickGO/GTerm?id=GO:0090407
7	7	purine nucleoside biosynthetic process	GO:0042451	0.0192	0.163	ATP5F1|1.373436785;ADSSL1|1.469655536;PANK4|0.649364304	3	102	121	21829	http://www.ebi.ac.uk/QuickGO/GTerm?id=GO:0042451
8	8	purine ribonucleoside biosynthetic process	GO:0046129	0.0192	0.163	ATP5F1|1.373436785;ADSSL1|1.469655536;PANK4|0.649364304	3	102	121	21829	http://www.ebi.ac.uk/QuickGO/GTerm?id=GO:0046129
7	7	metal ion transport	GO:0030001	0.0193	0.164	RYR3|1.208753681;ATP2B4|1.454010951;ATP2B2|1.385296881;A0A3Q2TTX7|1.32240644;CATSPER2|1.202421769;A0A3Q3ATJ1|1.201501275;ATP2A1|1.2337889;HSP70|1.283172572;FXYD6|0.766199089;FKBP12.6|0.773369444	10	846	121	21829	http://www.ebi.ac.uk/QuickGO/GTerm?id=GO:0030001
6	6	phosphorylation	GO:0016310	0.0194	0.164	IMPA1|1.338855168;ENO1|1.301513562;A0A3Q2UCH4|1.308620615;PTGES3|1.249959146;CAMK2D|1.395725167;A0A3Q3AZP2|1.434367428;UCH-L1|1.43716929;GPI|1.354148803;PGK1|1.22553449;HSPB1|1.337774448;CKM|1.28135235;ENO3|1.243593921;HSP70|1.283172572;CAB39|1.21239245;COX7C|1.254685321;ALDOC|1.365001997;SPEG|0.804476254;PANK4|0.649364304;PRKAB2|0.71569607;PRKCA|0.487532754;GLIPR2|0.785712158	21	2360	121	21829	http://www.ebi.ac.uk/QuickGO/GTerm?id=GO:0016310
8	7,8	myotube cell development	GO:0014904	0.0198	0.165	KBTBD10|1.353350665;LMOD3|1.522555731	2	39	121	21829	http://www.ebi.ac.uk/QuickGO/GTerm?id=GO:0014904
7	6,7	positive regulation of striated muscle cell differentiation	GO:0051155	0.0198	0.165	LMOD3|1.522555731;SMYD1|1.332742776	2	39	121	21829	http://www.ebi.ac.uk/QuickGO/GTerm?id=GO:0051155
5	5	regulation of transmembrane transport	GO:0034762	0.0205	0.166	A0A3Q2TTX7|1.32240644;CATSPER2|1.202421769;A0A3Q3ATJ1|1.201501275;HSP70|1.283172572;FXYD6|0.766199089;FKBP12.6|0.773369444	6	385	121	21829	http://www.ebi.ac.uk/QuickGO/GTerm?id=GO:0034762
9	8,9	purine ribonucleoside monophosphate biosynthetic process	GO:0009168	0.0207	0.166	AMPD3|1.306784743;ATP5F1|1.373436785;ADSSL1|1.469655536	3	105	121	21829	http://www.ebi.ac.uk/QuickGO/GTerm?id=GO:0009168
8	7,8	regulation of myotube differentiation	GO:0010830	0.0207	0.166	LMOD3|1.522555731;SMYD1|1.332742776	2	40	121	21829	http://www.ebi.ac.uk/QuickGO/GTerm?id=GO:0010830
6	6	positive regulation of cytoskeleton organization	GO:0051495	0.0208	0.166	LMOD3|1.522555731;RANBP1|1.340088175;ENSGALG00000027330|1.235499055;GMFB|0.703153051	4	188	121	21829	http://www.ebi.ac.uk/QuickGO/GTerm?id=GO:0051495
8	7,8	purine nucleoside monophosphate biosynthetic process	GO:0009127	0.0212	0.166	AMPD3|1.306784743;ATP5F1|1.373436785;ADSSL1|1.469655536	3	106	121	21829	http://www.ebi.ac.uk/QuickGO/GTerm?id=GO:0009127
8	8	succinate metabolic process	GO:0006105	0.022	0.166	SDHA|1.217654696	1	4	121	21829	http://www.ebi.ac.uk/QuickGO/GTerm?id=GO:0006105
9	6,8,9	positive regulation of cell migration by vascular endothelial growth factor signaling pathway	GO:0038089	0.022	0.166	HSPB1|1.337774448	1	4	121	21829	http://www.ebi.ac.uk/QuickGO/GTerm?id=GO:0038089
7	6,7	positive regulation of nitric-oxide synthase biosynthetic process	GO:0051770	0.022	0.166	PBEF1|0.760519451	1	4	121	21829	http://www.ebi.ac.uk/QuickGO/GTerm?id=GO:0051770
7	6,7	outer mitochondrial membrane organization	GO:0007008	0.022	0.166	SAMM50|0.563408826	1	4	121	21829	http://www.ebi.ac.uk/QuickGO/GTerm?id=GO:0007008
9	6,7,8,9	positive regulation of mitotic centrosome separation	GO:0046604	0.022	0.166	RANBP1|1.340088175	1	4	121	21829	http://www.ebi.ac.uk/QuickGO/GTerm?id=GO:0046604
7	5,7	negative regulation of striated muscle contraction	GO:0045988	0.022	0.166	ATP2A1|1.2337889	1	4	121	21829	http://www.ebi.ac.uk/QuickGO/GTerm?id=GO:0045988
6	6	bundle of His cell to Purkinje myocyte signaling	GO:0086028	0.022	0.166	A0A3Q3ATJ1|1.201501275	1	4	121	21829	http://www.ebi.ac.uk/QuickGO/GTerm?id=GO:0086028
8	5,7,8	protein import into mitochondrial inner membrane	GO:0045039	0.022	0.166	TIMM13|1.33072494	1	4	121	21829	http://www.ebi.ac.uk/QuickGO/GTerm?id=GO:0045039
8	7,8	10-formyltetrahydrofolate metabolic process	GO:0009256	0.022	0.166	MTHFD1L|0.749713642	1	4	121	21829	http://www.ebi.ac.uk/QuickGO/GTerm?id=GO:0009256
12	7,8,9,11,12	negative regulation of actin nucleation	GO:0051126	0.022	0.166	GMFB|0.703153051	1	4	121	21829	http://www.ebi.ac.uk/QuickGO/GTerm?id=GO:0051126
7	5,6,7	protein import into mitochondrial outer membrane	GO:0045040	0.022	0.166	SAMM50|0.563408826	1	4	121	21829	http://www.ebi.ac.uk/QuickGO/GTerm?id=GO:0045040
10	6,7,8,9,10	prolactin secretion	GO:0070459	0.022	0.166	PRKCA|0.487532754	1	4	121	21829	http://www.ebi.ac.uk/QuickGO/GTerm?id=GO:0070459
13	8,9,10,12,13	negative regulation of Arp2/3 complex-mediated actin nucleation	GO:0034316	0.022	0.166	GMFB|0.703153051	1	4	121	21829	http://www.ebi.ac.uk/QuickGO/GTerm?id=GO:0034316
4	4	cytolysis in other organism	GO:0051715	0.022	0.166	ALB|1.487005807	1	4	121	21829	http://www.ebi.ac.uk/QuickGO/GTerm?id=GO:0051715
7	7	bundle of His cell action potential	GO:0086043	0.022	0.166	A0A3Q3ATJ1|1.201501275	1	4	121	21829	http://www.ebi.ac.uk/QuickGO/GTerm?id=GO:0086043
9	7,8,9	axonal transport of mitochondrion	GO:0019896	0.022	0.166	UCH-L1|1.43716929	1	4	121	21829	http://www.ebi.ac.uk/QuickGO/GTerm?id=GO:0019896
6	6	action potential propagation	GO:0098870	0.022	0.166	FKBP12.6|0.773369444	1	4	121	21829	http://www.ebi.ac.uk/QuickGO/GTerm?id=GO:0098870
5	5	macromolecular complex assembly	GO:0065003	0.0224	0.168	PSMD11|1.440547778;LMOD3|1.522555731;EIF3I|1.293629736;MYOM2|1.223302409;ENSGALG00000002907|1.322866394;MYBPC2|1.243510197;CAPZA2|1.308764545;GMFB|0.703153051;SAMM50|0.563408826;LOC100859860|0.744437258;P08286|0.677683947;FGB|0.807555904;SUB1|0.814720615;HP1BP3|0.72359077	14	1395	121	21829	http://www.ebi.ac.uk/QuickGO/GTerm?id=GO:0065003
7	7	regulation of phosphoprotein phosphatase activity	GO:0043666	0.0237	0.177	PPP1R2|0.797609752;FKBP12.6|0.773369444	2	43	121	21829	http://www.ebi.ac.uk/QuickGO/GTerm?id=GO:0043666
6	5,6	regulation of actin cytoskeleton organization	GO:0032956	0.0247	0.182	LMOD3|1.522555731;ENSGALG00000002907|1.322866394;CAPZA2|1.308764545;ENSGALG00000027330|1.235499055;GMFB|0.703153051	5	296	121	21829	http://www.ebi.ac.uk/QuickGO/GTerm?id=GO:0032956
8	6,7,8	protein transmembrane import into intracellular organelle	GO:0044743	0.0248	0.182	TIMM13|1.33072494;SAMM50|0.563408826	2	44	121	21829	http://www.ebi.ac.uk/QuickGO/GTerm?id=GO:0044743
6	5,6	ion transmembrane transport	GO:0034220	0.0248	0.182	RYR3|1.208753681;ATP2B4|1.454010951;ATP2B2|1.385296881;A0A3Q2TTX7|1.32240644;CATSPER2|1.202421769;A0A3Q3ATJ1|1.201501275;ATP5F1|1.373436785;ATP2A1|1.2337889;HSP70|1.283172572;COX7C|1.254685321;A0A3Q3AUQ1|0.818305002;FXYD6|0.766199089;FKBP12.6|0.773369444	13	1277	121	21829	http://www.ebi.ac.uk/QuickGO/GTerm?id=GO:0034220
6	6	regulation of muscle contraction	GO:0006937	0.0262	0.192	TNNT3|1.527716062;ATP2A1|1.2337889;FKBP12.6|0.773369444	3	115	121	21829	http://www.ebi.ac.uk/QuickGO/GTerm?id=GO:0006937
4	4	circadian regulation of gene expression	GO:0032922	0.0269	0.195	PPP1CB|0.799006051;PBEF1|0.760519451	2	46	121	21829	http://www.ebi.ac.uk/QuickGO/GTerm?id=GO:0032922
5	5	embryonic neurocranium morphogenesis	GO:0048702	0.0274	0.195	MTHFD1L|0.749713642	1	5	121	21829	http://www.ebi.ac.uk/QuickGO/GTerm?id=GO:0048702
8	7,8	regulation of skeletal muscle contraction	GO:0014819	0.0274	0.195	ATP2A1|1.2337889	1	5	121	21829	http://www.ebi.ac.uk/QuickGO/GTerm?id=GO:0014819
10	8,9,10	negative regulation of type B pancreatic cell apoptotic process	GO:2000675	0.0274	0.195	A0A3Q2U6J9|1.340342648	1	5	121	21829	http://www.ebi.ac.uk/QuickGO/GTerm?id=GO:2000675
7	5,6,7	chaperone-mediated protein transport	GO:0072321	0.0274	0.195	TIMM13|1.33072494	1	5	121	21829	http://www.ebi.ac.uk/QuickGO/GTerm?id=GO:0072321
8	7,8	skeletal muscle thin filament assembly	GO:0030240	0.0274	0.195	LMOD3|1.522555731	1	5	121	21829	http://www.ebi.ac.uk/QuickGO/GTerm?id=GO:0030240
9	7,8,9	regulation of calcium-transporting ATPase activity	GO:1901894	0.0274	0.195	HSP70|1.283172572	1	5	121	21829	http://www.ebi.ac.uk/QuickGO/GTerm?id=GO:1901894
6	6	striated muscle tissue development	GO:0014706	0.0283	0.2	KBTBD10|1.353350665;LMOD3|1.522555731;MYPN|1.223593919;SMYD1|1.332742776;FLNB|0.613099367	5	307	121	21829	http://www.ebi.ac.uk/QuickGO/GTerm?id=GO:0014706
8	7,8	regulation of calcium ion transmembrane transporter activity	GO:1901019	0.0291	0.205	HSP70|1.283172572;FKBP12.6|0.773369444	2	48	121	21829	http://www.ebi.ac.uk/QuickGO/GTerm?id=GO:1901019
5	5	organophosphate catabolic process	GO:0046434	0.0311	0.215	IMPA1|1.338855168;ENO1|1.301513562;PRDX6|1.247143535	3	123	121	21829	http://www.ebi.ac.uk/QuickGO/GTerm?id=GO:0046434
7	6,7	regulation of ion transmembrane transporter activity	GO:0032412	0.0311	0.215	HSP70|1.283172572;FXYD6|0.766199089;FKBP12.6|0.773369444	3	123	121	21829	http://www.ebi.ac.uk/QuickGO/GTerm?id=GO:0032412
4	4	macromolecular complex subunit organization	GO:0043933	0.0315	0.215	PSMD11|1.440547778;LMOD3|1.522555731;EIF3I|1.293629736;PDLIM3|1.286425032;MYOM2|1.223302409;SMYD1|1.332742776;ENSGALG00000002907|1.322866394;MYBPC2|1.243510197;CAPZA2|1.308764545;RANBP1|1.340088175;ENSGALG00000027330|1.235499055;GMFB|0.703153051;SAMM50|0.563408826;LOC100859860|0.744437258;P08286|0.677683947;FGB|0.807555904;SUB1|0.814720615;HP1BP3|0.72359077	18	2034	121	21829	http://www.ebi.ac.uk/QuickGO/GTerm?id=GO:0043933
4	4	organic substance catabolic process	GO:1901575	0.0317	0.215	IMPA1|1.338855168;ENO1|1.301513562;UCH-L1|1.43716929;ACAT1|1.26178047;PSMD6|1.32702021;PRDX6|1.247143535;GPI|1.354148803;PGK1|1.22553449;ENO3|1.243593921;BLMH|1.469427111;RANBP1|1.340088175;ALDOC|1.365001997;CUL2|0.771088233;XPNPEP1|0.544019076;Rchy1|0.707606765	15	1603	121	21829	http://www.ebi.ac.uk/QuickGO/GTerm?id=GO:1901575
8	7,8	ribonucleoside monophosphate biosynthetic process	GO:0009156	0.0324	0.215	AMPD3|1.306784743;ATP5F1|1.373436785;ADSSL1|1.469655536	3	125	121	21829	http://www.ebi.ac.uk/QuickGO/GTerm?id=GO:0009156
7	6,7	intracellular protein transmembrane transport	GO:0065002	0.0326	0.215	TIMM13|1.33072494;SAMM50|0.563408826	2	51	121	21829	http://www.ebi.ac.uk/QuickGO/GTerm?id=GO:0065002
6	5,6	negative regulation of inclusion body assembly	GO:0090084	0.0328	0.215	HSP70|1.283172572	1	6	121	21829	http://www.ebi.ac.uk/QuickGO/GTerm?id=GO:0090084
9	8,9	regulation of type B pancreatic cell apoptotic process	GO:2000674	0.0328	0.215	A0A3Q2U6J9|1.340342648	1	6	121	21829	http://www.ebi.ac.uk/QuickGO/GTerm?id=GO:2000674
9	7,8,9	ventricular cardiac muscle cell membrane repolarization	GO:0099625	0.0328	0.215	A0A3Q3ATJ1|1.201501275	1	6	121	21829	http://www.ebi.ac.uk/QuickGO/GTerm?id=GO:0099625
7	5,6,7	negative regulation of insulin-like growth factor receptor signaling pathway	GO:0043569	0.0328	0.215	CILP|1.39877359	1	6	121	21829	http://www.ebi.ac.uk/QuickGO/GTerm?id=GO:0043569
7	5,6,7	positive regulation of axon regeneration	GO:0048680	0.0328	0.215	FKBP12.6|0.773369444	1	6	121	21829	http://www.ebi.ac.uk/QuickGO/GTerm?id=GO:0048680
8	7,8	tetrahydrofolate biosynthetic process	GO:0046654	0.0328	0.215	MTHFD1L|0.749713642	1	6	121	21829	http://www.ebi.ac.uk/QuickGO/GTerm?id=GO:0046654
4	4	positive regulation of neuron projection regeneration	GO:0070572	0.0328	0.215	FKBP12.6|0.773369444	1	6	121	21829	http://www.ebi.ac.uk/QuickGO/GTerm?id=GO:0070572
7	5,7	positive regulation of striated muscle contraction	GO:0045989	0.0328	0.215	ATP2A1|1.2337889	1	6	121	21829	http://www.ebi.ac.uk/QuickGO/GTerm?id=GO:0045989
9	6,7,8,9	regulation of cardiac muscle cell membrane repolarization	GO:0099623	0.0328	0.215	A0A3Q3ATJ1|1.201501275	1	6	121	21829	http://www.ebi.ac.uk/QuickGO/GTerm?id=GO:0099623
11	10,11	'de novo' AMP biosynthetic process	GO:0044208	0.0328	0.215	ADSSL1|1.469655536	1	6	121	21829	http://www.ebi.ac.uk/QuickGO/GTerm?id=GO:0044208
9	6,7,8,9	positive regulation of tumor necrosis factor biosynthetic process	GO:0042535	0.0328	0.215	HSPB1|1.337774448	1	6	121	21829	http://www.ebi.ac.uk/QuickGO/GTerm?id=GO:0042535
8	8	protein lipoylation	GO:0009249	0.0328	0.215	GLRX5|0.502973712	1	6	121	21829	http://www.ebi.ac.uk/QuickGO/GTerm?id=GO:0009249
3	3	system process	GO:0003008	0.0333	0.217	TNNT3|1.527716062;A0A3Q2UEL1|1.305534201;A0A3Q3ATJ1|1.201501275;UCH-L1|1.43716929;LMOD3|1.522555731;MYOM1|1.254881107;MYOM2|1.223302409;ENSGALG00000002907|1.322866394;TPM1|1.390357267;ATP2A1|1.2337889;MYBPC2|1.243510197;ENSGALG00000027330|1.235499055;FKBP12.6|0.773369444	13	1332	121	21829	http://www.ebi.ac.uk/QuickGO/GTerm?id=GO:0003008
7	6,7	positive regulation of fibril organization	GO:1902905	0.0337	0.219	LMOD3|1.522555731;ENSGALG00000027330|1.235499055;GMFB|0.703153051	3	127	121	21829	http://www.ebi.ac.uk/QuickGO/GTerm?id=GO:1902905
4	4	neural nucleus development	GO:0048857	0.0349	0.221	ATP5F1|1.373436785;MBP|0.690656099	2	53	121	21829	http://www.ebi.ac.uk/QuickGO/GTerm?id=GO:0048857
6	5,6	regulation of transmembrane transporter activity	GO:0022898	0.0351	0.221	HSP70|1.283172572;FXYD6|0.766199089;FKBP12.6|0.773369444	3	129	121	21829	http://www.ebi.ac.uk/QuickGO/GTerm?id=GO:0022898
5	4,5	regulation of protein complex assembly	GO:0043254	0.0353	0.221	LMOD3|1.522555731;ENSGALG00000002907|1.322866394;CAPZA2|1.308764545;GMFB|0.703153051;SUB1|0.814720615	5	326	121	21829	http://www.ebi.ac.uk/QuickGO/GTerm?id=GO:0043254
4	3,4	regulation of cellular component biogenesis	GO:0044087	0.0354	0.221	LMOD3|1.522555731;ENSGALG00000002907|1.322866394;CAPZA2|1.308764545;HSP70|1.283172572;ENSGALG00000027330|1.235499055;GMFB|0.703153051;SUB1|0.814720615;ORMDL3|0.402916918	8	679	121	21829	http://www.ebi.ac.uk/QuickGO/GTerm?id=GO:0044087
6	6	nucleoside biosynthetic process	GO:0009163	0.0358	0.221	ATP5F1|1.373436785;ADSSL1|1.469655536;PANK4|0.649364304	3	130	121	21829	http://www.ebi.ac.uk/QuickGO/GTerm?id=GO:0009163
7	7	ribonucleoside biosynthetic process	GO:0042455	0.0358	0.221	ATP5F1|1.373436785;ADSSL1|1.469655536;PANK4|0.649364304	3	130	121	21829	http://www.ebi.ac.uk/QuickGO/GTerm?id=GO:0042455
5	5	muscle tissue development	GO:0060537	0.0369	0.221	KBTBD10|1.353350665;LMOD3|1.522555731;MYPN|1.223593919;SMYD1|1.332742776;FLNB|0.613099367	5	330	121	21829	http://www.ebi.ac.uk/QuickGO/GTerm?id=GO:0060537
4	4	heart development	GO:0007507	0.037	0.221	PDLIM3|1.286425032;MYPN|1.223593919;SMYD1|1.332742776;A0A3Q2U769|0.584188784;FBLN2|0.537261949;FKBP12.6|0.773369444	6	443	121	21829	http://www.ebi.ac.uk/QuickGO/GTerm?id=GO:0007507
5	4,5	regulation of actin filament-based process	GO:0032970	0.0373	0.221	LMOD3|1.522555731;ENSGALG00000002907|1.322866394;CAPZA2|1.308764545;ENSGALG00000027330|1.235499055;GMFB|0.703153051	5	331	121	21829	http://www.ebi.ac.uk/QuickGO/GTerm?id=GO:0032970
3	3	catabolic process	GO:0009056	0.0373	0.221	IMPA1|1.338855168;ENO1|1.301513562;A0A3Q2UCH4|1.308620615;UCH-L1|1.43716929;ACAT1|1.26178047;PSMD6|1.32702021;MYOM1|1.254881107;PRDX6|1.247143535;GPI|1.354148803;PGK1|1.22553449;ENO3|1.243593921;BLMH|1.469427111;RANBP1|1.340088175;ALDOC|1.365001997;CUL2|0.771088233;XPNPEP1|0.544019076;Rchy1|0.707606765	17	1928	121	21829	http://www.ebi.ac.uk/QuickGO/GTerm?id=GO:0009056
9	8,9	actin filament capping	GO:0051693	0.0374	0.221	LMOD3|1.522555731;CAPZA2|1.308764545	2	55	121	21829	http://www.ebi.ac.uk/QuickGO/GTerm?id=GO:0051693
7	5,6,7	protein transmembrane transport	GO:0071806	0.0374	0.221	TIMM13|1.33072494;SAMM50|0.563408826	2	55	121	21829	http://www.ebi.ac.uk/QuickGO/GTerm?id=GO:0071806
6	5,6	positive regulation of muscle cell differentiation	GO:0051149	0.0374	0.221	LMOD3|1.522555731;SMYD1|1.332742776	2	55	121	21829	http://www.ebi.ac.uk/QuickGO/GTerm?id=GO:0051149
6	5,6	glycosyl compound biosynthetic process	GO:1901659	0.0379	0.221	ATP5F1|1.373436785;ADSSL1|1.469655536;PANK4|0.649364304	3	133	121	21829	http://www.ebi.ac.uk/QuickGO/GTerm?id=GO:1901659
10	7,8,9,10	regulation of cardiac muscle contraction by regulation of the release of sequestered calcium ion	GO:0010881	0.0382	0.221	FKBP12.6|0.773369444	1	7	121	21829	http://www.ebi.ac.uk/QuickGO/GTerm?id=GO:0010881
5	5	fructose 1,6-bisphosphate metabolic process	GO:0030388	0.0382	0.221	ALDOC|1.365001997	1	7	121	21829	http://www.ebi.ac.uk/QuickGO/GTerm?id=GO:0030388
7	4,7	killing of cells in other organism involved in symbiotic interaction	GO:0051883	0.0382	0.221	ALB|1.487005807	1	7	121	21829	http://www.ebi.ac.uk/QuickGO/GTerm?id=GO:0051883
8	8	zymogen inhibition	GO:0097341	0.0382	0.221	A0A3Q2U6J9|1.340342648	1	7	121	21829	http://www.ebi.ac.uk/QuickGO/GTerm?id=GO:0097341
9	5,8,9	negative regulation of heart rate	GO:0010459	0.0382	0.221	FKBP12.6|0.773369444	1	7	121	21829	http://www.ebi.ac.uk/QuickGO/GTerm?id=GO:0010459
8	8	type B pancreatic cell apoptotic process	GO:0097050	0.0382	0.221	A0A3Q2U6J9|1.340342648	1	7	121	21829	http://www.ebi.ac.uk/QuickGO/GTerm?id=GO:0097050
8	5,7,8	somite rostral/caudal axis specification	GO:0032525	0.0382	0.221	A0A3Q2U769|0.584188784	1	7	121	21829	http://www.ebi.ac.uk/QuickGO/GTerm?id=GO:0032525
9	6,7,8,9	mitochondrial electron transport, cytochrome c to oxygen	GO:0006123	0.0382	0.221	COX7C|1.254685321	1	7	121	21829	http://www.ebi.ac.uk/QuickGO/GTerm?id=GO:0006123
6	6	regulation of immunoglobulin secretion	GO:0051023	0.0382	0.221	GPI|1.354148803	1	7	121	21829	http://www.ebi.ac.uk/QuickGO/GTerm?id=GO:0051023
6	6	coenzyme catabolic process	GO:0009109	0.0382	0.221	ACAT1|1.26178047	1	7	121	21829	http://www.ebi.ac.uk/QuickGO/GTerm?id=GO:0009109
8	5,6,7,8	regulation of ceramide biosynthetic process	GO:2000303	0.0382	0.221	ORMDL3|0.402916918	1	7	121	21829	http://www.ebi.ac.uk/QuickGO/GTerm?id=GO:2000303
7	6,7	regulation of nitric-oxide synthase biosynthetic process	GO:0051769	0.0382	0.221	PBEF1|0.760519451	1	7	121	21829	http://www.ebi.ac.uk/QuickGO/GTerm?id=GO:0051769
4	4	negative regulation of insulin secretion involved in cellular response to glucose stimulus	GO:0061179	0.0382	0.221	FKBP12.6|0.773369444	1	7	121	21829	http://www.ebi.ac.uk/QuickGO/GTerm?id=GO:0061179
6	6	disruption of cells of other organism involved in symbiotic interaction	GO:0051818	0.0382	0.221	ALB|1.487005807	1	7	121	21829	http://www.ebi.ac.uk/QuickGO/GTerm?id=GO:0051818
10	9,10	inhibition of cysteine-type endopeptidase activity	GO:0097340	0.0382	0.221	A0A3Q2U6J9|1.340342648	1	7	121	21829	http://www.ebi.ac.uk/QuickGO/GTerm?id=GO:0097340
8	6,8	sulfur amino acid catabolic process	GO:0000098	0.0382	0.221	BLMH|1.469427111	1	7	121	21829	http://www.ebi.ac.uk/QuickGO/GTerm?id=GO:0000098
6	6	nitric-oxide synthase biosynthetic process	GO:0051767	0.0382	0.221	PBEF1|0.760519451	1	7	121	21829	http://www.ebi.ac.uk/QuickGO/GTerm?id=GO:0051767
7	7	glycerophospholipid catabolic process	GO:0046475	0.0382	0.221	PRDX6|1.247143535	1	7	121	21829	http://www.ebi.ac.uk/QuickGO/GTerm?id=GO:0046475
10	7,8,9,10	regulation of mRNA splicing, via spliceosome	GO:0048024	0.0386	0.223	PRDX6|1.247143535;SRSF2|0.465409726	2	56	121	21829	http://www.ebi.ac.uk/QuickGO/GTerm?id=GO:0048024
6	5,6	positive regulation of extracellular matrix organization	GO:1903055	0.0393	0.226	LMOD3|1.522555731;ENSGALG00000027330|1.235499055;GMFB|0.703153051	3	135	121	21829	http://www.ebi.ac.uk/QuickGO/GTerm?id=GO:1903055
4	4	thioester metabolic process	GO:0035383	0.0399	0.228	A0A3Q2UEL1|1.305534201;ACAT1|1.26178047	2	57	121	21829	http://www.ebi.ac.uk/QuickGO/GTerm?id=GO:0035383
6	5,6	acyl-CoA metabolic process	GO:0006637	0.0399	0.228	A0A3Q2UEL1|1.305534201;ACAT1|1.26178047	2	57	121	21829	http://www.ebi.ac.uk/QuickGO/GTerm?id=GO:0006637
7	6,7	nucleoside monophosphate biosynthetic process	GO:0009124	0.0408	0.231	AMPD3|1.306784743;ATP5F1|1.373436785;ADSSL1|1.469655536	3	137	121	21829	http://www.ebi.ac.uk/QuickGO/GTerm?id=GO:0009124
7	6,7	negative regulation of cytoskeleton organization	GO:0051494	0.0408	0.231	LMOD3|1.522555731;CAPZA2|1.308764545;GMFB|0.703153051	3	137	121	21829	http://www.ebi.ac.uk/QuickGO/GTerm?id=GO:0051494
5	4,5	regulation of transporter activity	GO:0032409	0.0423	0.236	HSP70|1.283172572;FXYD6|0.766199089;FKBP12.6|0.773369444	3	139	121	21829	http://www.ebi.ac.uk/QuickGO/GTerm?id=GO:0032409
6	6	carboxylic acid metabolic process	GO:0019752	0.0423	0.236	ENO1|1.301513562;ACAT1|1.26178047;GPI|1.354148803;SDHA|1.217654696;PGK1|1.22553449;LDHA|1.406541698;ENO3|1.243593921;BLMH|1.469427111;ALDOC|1.365001997;MTHFD1L|0.749713642	10	966	121	21829	http://www.ebi.ac.uk/QuickGO/GTerm?id=GO:0019752
5	5	response to hydrogen peroxide	GO:0042542	0.0425	0.236	KPNA4|1.24977891;FKBP12.6|0.773369444	2	59	121	21829	http://www.ebi.ac.uk/QuickGO/GTerm?id=GO:0042542
6	5,6	protein transport	GO:0015031	0.0428	0.236	GPI|1.354148803;HSPB1|1.337774448;RANBP1|1.340088175;KPNA4|1.24977891;RAB5C|2.549741805;TIMM13|1.33072494;BCAP31|0.807755804;VPS29|0.751790268;A0A3Q2U769|0.584188784;SAMM50|0.563408826;KPNA3|0.806756534;PRKCA|0.487532754;FKBP12.6|0.773369444	13	1382	121	21829	http://www.ebi.ac.uk/QuickGO/GTerm?id=GO:0015031
9	9	peptidyl-diphthamide metabolic process	GO:0017182	0.0435	0.236	DPH5|0.719312178	1	8	121	21829	http://www.ebi.ac.uk/QuickGO/GTerm?id=GO:0017182
9	5,6,7,9	negative regulation of release of sequestered calcium ion into cytosol	GO:0051280	0.0435	0.236	FKBP12.6|0.773369444	1	8	121	21829	http://www.ebi.ac.uk/QuickGO/GTerm?id=GO:0051280
5	4,5	regulation of inclusion body assembly	GO:0090083	0.0435	0.236	HSP70|1.283172572	1	8	121	21829	http://www.ebi.ac.uk/QuickGO/GTerm?id=GO:0090083
10	5,6,7,8,9,10	immunoglobulin secretion	GO:0048305	0.0435	0.236	GPI|1.354148803	1	8	121	21829	http://www.ebi.ac.uk/QuickGO/GTerm?id=GO:0048305
10	5,8,9,10	peptidyl-diphthamide biosynthetic process from peptidyl-histidine	GO:0017183	0.0435	0.236	DPH5|0.719312178	1	8	121	21829	http://www.ebi.ac.uk/QuickGO/GTerm?id=GO:0017183
9	6,7,8,9	positive regulation of skeletal muscle fiber development	GO:0048743	0.0435	0.236	LMOD3|1.522555731	1	8	121	21829	http://www.ebi.ac.uk/QuickGO/GTerm?id=GO:0048743
9	7,8,9	cardiac muscle fiber development	GO:0048739	0.0435	0.236	MYPN|1.223593919	1	8	121	21829	http://www.ebi.ac.uk/QuickGO/GTerm?id=GO:0048739
9	6,7,8,9	skeletal myofibril assembly	GO:0014866	0.0435	0.236	LMOD3|1.522555731	1	8	121	21829	http://www.ebi.ac.uk/QuickGO/GTerm?id=GO:0014866
5	5	neuronal action potential propagation	GO:0019227	0.0435	0.236	FKBP12.6|0.773369444	1	8	121	21829	http://www.ebi.ac.uk/QuickGO/GTerm?id=GO:0019227
8	7,8	negative regulation of actin filament depolymerization	GO:0030835	0.0451	0.242	LMOD3|1.522555731;CAPZA2|1.308764545	2	61	121	21829	http://www.ebi.ac.uk/QuickGO/GTerm?id=GO:0030835
6	5,6	mitochondrial membrane organization	GO:0007006	0.0451	0.242	TIMM13|1.33072494;SAMM50|0.563408826	2	61	121	21829	http://www.ebi.ac.uk/QuickGO/GTerm?id=GO:0007006
10	9,10	ATP biosynthetic process	GO:0006754	0.0451	0.242	ENO1|1.301513562;ATP5F1|1.373436785	2	61	121	21829	http://www.ebi.ac.uk/QuickGO/GTerm?id=GO:0006754
11	8,9,10,11	calcium ion transmembrane import into cytosol	GO:0097553	0.0464	0.246	RYR3|1.208753681;FKBP12.6|0.773369444	2	62	121	21829	http://www.ebi.ac.uk/QuickGO/GTerm?id=GO:0097553
5	5	embryonic heart tube development	GO:0035050	0.0464	0.246	A0A3Q2U769|0.584188784;FKBP12.6|0.773369444	2	62	121	21829	http://www.ebi.ac.uk/QuickGO/GTerm?id=GO:0035050
4	4	carbohydrate metabolic process	GO:0005975	0.0466	0.246	IMPA1|1.338855168;ENO1|1.301513562;GANC|1.205632423;GPI|1.354148803;PGK1|1.22553449;LDHA|1.406541698;ENO3|1.243593921;ALDOC|1.365001997;PPP1CB|0.799006051	9	849	121	21829	http://www.ebi.ac.uk/QuickGO/GTerm?id=GO:0005975
4	4	cellular component disassembly	GO:0022411	0.0469	0.246	A0A3Q2UCH4|1.308620615;LMOD3|1.522555731;MYOM1|1.254881107;CAPZA2|1.308764545;HSP70|1.283172572	5	353	121	21829	http://www.ebi.ac.uk/QuickGO/GTerm?id=GO:0022411
5	5	regulation of muscle system process	GO:0090257	0.0477	0.246	TNNT3|1.527716062;ATP2A1|1.2337889;FKBP12.6|0.773369444	3	146	121	21829	http://www.ebi.ac.uk/QuickGO/GTerm?id=GO:0090257
7	7	dicarboxylic acid metabolic process	GO:0043648	0.0478	0.246	SDHA|1.217654696;MTHFD1L|0.749713642	2	63	121	21829	http://www.ebi.ac.uk/QuickGO/GTerm?id=GO:0043648
6	4,5,6	transmembrane transport	GO:0055085	0.048	0.246	RYR3|1.208753681;ATP2B4|1.454010951;ATP2B2|1.385296881;A0A3Q2TTX7|1.32240644;CATSPER2|1.202421769;A0A3Q3ATJ1|1.201501275;ATP5F1|1.373436785;ATP2A1|1.2337889;HSP70|1.283172572;TIMM13|1.33072494;COX7C|1.254685321;A0A3Q3AUQ1|0.818305002;SAMM50|0.563408826;FXYD6|0.766199089;FKBP12.6|0.773369444	15	1695	121	21829	http://www.ebi.ac.uk/QuickGO/GTerm?id=GO:0055085
4	4	negative regulation of calcium ion transport into cytosol	GO:0010523	0.0488	0.246	FKBP12.6|0.773369444	1	9	121	21829	http://www.ebi.ac.uk/QuickGO/GTerm?id=GO:0010523
5	5	bundle of His cell to Purkinje myocyte communication	GO:0086069	0.0488	0.246	A0A3Q3ATJ1|1.201501275	1	9	121	21829	http://www.ebi.ac.uk/QuickGO/GTerm?id=GO:0086069
8	7,8	IMP salvage	GO:0032264	0.0488	0.246	AMPD3|1.306784743	1	9	121	21829	http://www.ebi.ac.uk/QuickGO/GTerm?id=GO:0032264
5	5	embryonic viscerocranium morphogenesis	GO:0048703	0.0488	0.246	MTHFD1L|0.749713642	1	9	121	21829	http://www.ebi.ac.uk/QuickGO/GTerm?id=GO:0048703
8	6,8	negative regulation of calcium ion import	GO:0090281	0.0488	0.246	FKBP12.6|0.773369444	1	9	121	21829	http://www.ebi.ac.uk/QuickGO/GTerm?id=GO:0090281
6	6	regulation of mitotic centrosome separation	GO:0046602	0.0488	0.246	RANBP1|1.340088175	1	9	121	21829	http://www.ebi.ac.uk/QuickGO/GTerm?id=GO:0046602
9	5,6,8,9	positive regulation of endothelial cell chemotaxis	GO:2001028	0.0488	0.246	HSPB1|1.337774448	1	9	121	21829	http://www.ebi.ac.uk/QuickGO/GTerm?id=GO:2001028
7	6,7	macromitophagy	GO:0000423	0.0488	0.246	A0A3Q2UCH4|1.308620615	1	9	121	21829	http://www.ebi.ac.uk/QuickGO/GTerm?id=GO:0000423
8	6,7,8	negative regulation of ryanodine-sensitive calcium-release channel activity	GO:0060315	0.0488	0.246	FKBP12.6|0.773369444	1	9	121	21829	http://www.ebi.ac.uk/QuickGO/GTerm?id=GO:0060315
5	4,5	positive regulation of sequestering of calcium ion	GO:0051284	0.0488	0.246	FKBP12.6|0.773369444	1	9	121	21829	http://www.ebi.ac.uk/QuickGO/GTerm?id=GO:0051284
7	5,6,7	negative regulation of sphingolipid biosynthetic process	GO:0090155	0.0488	0.246	ORMDL3|0.402916918	1	9	121	21829	http://www.ebi.ac.uk/QuickGO/GTerm?id=GO:0090155
8	8	cullin deneddylation	GO:0010388	0.0488	0.246	COPS7B|0.663774909	1	9	121	21829	http://www.ebi.ac.uk/QuickGO/GTerm?id=GO:0010388
9	6,7,8,9	regulation of interferon-gamma-mediated signaling pathway	GO:0060334	0.0488	0.246	A0A3Q2UCH4|1.308620615	1	9	121	21829	http://www.ebi.ac.uk/QuickGO/GTerm?id=GO:0060334
8	8	peptidyl-histidine modification	GO:0018202	0.0488	0.246	DPH5|0.719312178	1	9	121	21829	http://www.ebi.ac.uk/QuickGO/GTerm?id=GO:0018202
4	4	cellular component assembly	GO:0022607	0.0489	0.246	KBTBD10|1.353350665;PSMD11|1.440547778;LMOD3|1.522555731;EIF3I|1.293629736;MYOM2|1.223302409;MYPN|1.223593919;ENSGALG00000002907|1.322866394;MYBPC2|1.243510197;CAPZA2|1.308764545;HSP70|1.283172572;ENSGALG00000027330|1.235499055;GMFB|0.703153051;SAMM50|0.563408826;LOC100859860|0.744437258;P08286|0.677683947;FGB|0.807555904;SUB1|0.814720615;HP1BP3|0.72359077	18	2145	121	21829	http://www.ebi.ac.uk/QuickGO/GTerm?id=GO:0022607
5	5	nitrogen compound transport	GO:0071705	0.0493	0.247	GPI|1.354148803;HSPB1|1.337774448;RANBP1|1.340088175;KPNA4|1.24977891;RAB5C|2.549741805;TIMM13|1.33072494;BCAP31|0.807755804;VPS29|0.751790268;A0A3Q2U769|0.584188784;SAMM50|0.563408826;KPNA3|0.806756534;PRKCA|0.487532754;FKBP12.6|0.773369444	13	1412	121	21829	http://www.ebi.ac.uk/QuickGO/GTerm?id=GO:0071705
11	7,8,11	calcium ion import into cytosol	GO:1902656	0.0519	0.257	RYR3|1.208753681;FKBP12.6|0.773369444	2	66	121	21829	http://www.ebi.ac.uk/QuickGO/GTerm?id=GO:1902656
8	8	gluconeogenesis	GO:0006094	0.0534	0.257	GPI|1.354148803;ENO3|1.243593921	2	67	121	21829	http://www.ebi.ac.uk/QuickGO/GTerm?id=GO:0006094
4	4	response to heat	GO:0009408	0.0534	0.257	CKM|1.28135235;HSP70|1.283172572	2	67	121	21829	http://www.ebi.ac.uk/QuickGO/GTerm?id=GO:0009408
6	6	regulation of striated muscle cell differentiation	GO:0051153	0.0534	0.257	LMOD3|1.522555731;SMYD1|1.332742776	2	67	121	21829	http://www.ebi.ac.uk/QuickGO/GTerm?id=GO:0051153
6	6	heart contraction	GO:0060047	0.0535	0.257	A0A3Q3ATJ1|1.201501275;TPM1|1.390357267;FKBP12.6|0.773369444	3	153	121	21829	http://www.ebi.ac.uk/QuickGO/GTerm?id=GO:0060047
8	6,7,8	regulation of tumor necrosis factor biosynthetic process	GO:0042534	0.0541	0.257	HSPB1|1.337774448	1	10	121	21829	http://www.ebi.ac.uk/QuickGO/GTerm?id=GO:0042534
6	5,6	homocysteine metabolic process	GO:0050667	0.0541	0.257	BLMH|1.469427111	1	10	121	21829	http://www.ebi.ac.uk/QuickGO/GTerm?id=GO:0050667
6	5,6	positive regulation of centrosome cycle	GO:0046607	0.0541	0.257	RANBP1|1.340088175	1	10	121	21829	http://www.ebi.ac.uk/QuickGO/GTerm?id=GO:0046607
9	8,9	negative regulation of phosphoprotein phosphatase activity	GO:0032515	0.0541	0.257	FKBP12.6|0.773369444	1	10	121	21829	http://www.ebi.ac.uk/QuickGO/GTerm?id=GO:0032515
7	7	male meiosis I	GO:0007141	0.0541	0.257	HSP70|1.283172572	1	10	121	21829	http://www.ebi.ac.uk/QuickGO/GTerm?id=GO:0007141
5	5	regulation of response to interferon-gamma	GO:0060330	0.0541	0.257	A0A3Q2UCH4|1.308620615	1	10	121	21829	http://www.ebi.ac.uk/QuickGO/GTerm?id=GO:0060330
10	9,10	AMP biosynthetic process	GO:0006167	0.0541	0.257	ADSSL1|1.469655536	1	10	121	21829	http://www.ebi.ac.uk/QuickGO/GTerm?id=GO:0006167
7	6,7	tumor necrosis factor biosynthetic process	GO:0042533	0.0541	0.257	HSPB1|1.337774448	1	10	121	21829	http://www.ebi.ac.uk/QuickGO/GTerm?id=GO:0042533
8	6,7,8	cardiac muscle cell membrane repolarization	GO:0099622	0.0541	0.257	A0A3Q3ATJ1|1.201501275	1	10	121	21829	http://www.ebi.ac.uk/QuickGO/GTerm?id=GO:0099622
6	5,6	maintenance of organelle location	GO:0051657	0.0541	0.257	ALB|1.487005807	1	10	121	21829	http://www.ebi.ac.uk/QuickGO/GTerm?id=GO:0051657
10	9,10	pointed-end actin filament capping	GO:0051694	0.0541	0.257	LMOD3|1.522555731	1	10	121	21829	http://www.ebi.ac.uk/QuickGO/GTerm?id=GO:0051694
7	6,7	purine nucleotide salvage	GO:0032261	0.0541	0.257	AMPD3|1.306784743	1	10	121	21829	http://www.ebi.ac.uk/QuickGO/GTerm?id=GO:0032261
6	5,6	respiratory electron transport chain	GO:0022904	0.0548	0.26	SDHA|1.217654696;COX7C|1.254685321	2	68	121	21829	http://www.ebi.ac.uk/QuickGO/GTerm?id=GO:0022904
5	5	regulation of ion transport	GO:0043269	0.0559	0.264	A0A3Q2TTX7|1.32240644;CATSPER2|1.202421769;A0A3Q3ATJ1|1.201501275;HSP70|1.283172572;FXYD6|0.766199089;FKBP12.6|0.773369444	6	491	121	21829	http://www.ebi.ac.uk/QuickGO/GTerm?id=GO:0043269
4	4	tissue development	GO:0009888	0.056	0.264	KBTBD10|1.353350665;LMOD3|1.522555731;GPI|1.354148803;MYPN|1.223593919;SMYD1|1.332742776;TAGLN|1.249989286;ALDOC|1.365001997;A0A3Q2U769|0.584188784;FLNB|0.613099367;MTHFD1L|0.749713642;FBLN2|0.537261949;FKBP12.6|0.773369444;GLIPR2|0.785712158	13	1440	121	21829	http://www.ebi.ac.uk/QuickGO/GTerm?id=GO:0009888
11	7,8,10,11	actin nucleation	GO:0045010	0.0562	0.265	LMOD3|1.522555731;GMFB|0.703153051	2	69	121	21829	http://www.ebi.ac.uk/QuickGO/GTerm?id=GO:0045010
5	4,5	cellular homeostasis	GO:0019725	0.0573	0.269	RYR3|1.208753681;TXNRD3|1.204580616;PRDX6|1.247143535;ERP44|0.745186445;GLRX5|0.502973712;FKBP12.6|0.773369444;ORMDL3|0.402916918	7	620	121	21829	http://www.ebi.ac.uk/QuickGO/GTerm?id=GO:0019725
8	7,8	hydrogen ion transmembrane transport	GO:1902600	0.0578	0.269	ATP5F1|1.373436785;COX7C|1.254685321;A0A3Q3AUQ1|0.818305002	3	158	121	21829	http://www.ebi.ac.uk/QuickGO/GTerm?id=GO:1902600
4	4	single-organism catabolic process	GO:0044712	0.0583	0.269	IMPA1|1.338855168;ACAT1|1.26178047;MYOM1|1.254881107;PRDX6|1.247143535;GPI|1.354148803;PGK1|1.22553449;ENO3|1.243593921;BLMH|1.469427111;ALDOC|1.365001997	9	887	121	21829	http://www.ebi.ac.uk/QuickGO/GTerm?id=GO:0044712
3	3	cellular component biogenesis	GO:0044085	0.0584	0.269	KBTBD10|1.353350665;PSMD11|1.440547778;LMOD3|1.522555731;EIF3I|1.293629736;MYOM2|1.223302409;MYPN|1.223593919;ENSGALG00000002907|1.322866394;MYBPC2|1.243510197;CAPZA2|1.308764545;HSP70|1.283172572;ENSGALG00000027330|1.235499055;GMFB|0.703153051;SAMM50|0.563408826;LOC100859860|0.744437258;P08286|0.677683947;FGB|0.807555904;SUB1|0.814720615;HP1BP3|0.72359077;ORMDL3|0.402916918	19	2346	121	21829	http://www.ebi.ac.uk/QuickGO/GTerm?id=GO:0044085
7	7	hexose biosynthetic process	GO:0019319	0.0591	0.269	GPI|1.354148803;ENO3|1.243593921	2	71	121	21829	http://www.ebi.ac.uk/QuickGO/GTerm?id=GO:0019319
4	4	cellular ketone body metabolic process	GO:0046950	0.0593	0.269	ACAT1|1.26178047	1	11	121	21829	http://www.ebi.ac.uk/QuickGO/GTerm?id=GO:0046950
6	6	synaptonemal complex organization	GO:0070193	0.0593	0.269	HSP70|1.283172572	1	11	121	21829	http://www.ebi.ac.uk/QuickGO/GTerm?id=GO:0070193
5	5	inclusion body assembly	GO:0070841	0.0593	0.269	HSP70|1.283172572	1	11	121	21829	http://www.ebi.ac.uk/QuickGO/GTerm?id=GO:0070841
9	6,7,9	regulation of skeletal muscle fiber development	GO:0048742	0.0593	0.269	LMOD3|1.522555731	1	11	121	21829	http://www.ebi.ac.uk/QuickGO/GTerm?id=GO:0048742
5	5	response to mitochondrial depolarisation	GO:0098780	0.0593	0.269	A0A3Q2UCH4|1.308620615	1	11	121	21829	http://www.ebi.ac.uk/QuickGO/GTerm?id=GO:0098780
10	7,8,9,10	regulation of ventricular cardiac muscle cell membrane repolarization	GO:0060307	0.0593	0.269	A0A3Q3ATJ1|1.201501275	1	11	121	21829	http://www.ebi.ac.uk/QuickGO/GTerm?id=GO:0060307
7	6,7	keratinocyte development	GO:0003334	0.0593	0.269	FLNB|0.613099367	1	11	121	21829	http://www.ebi.ac.uk/QuickGO/GTerm?id=GO:0003334
6	6	mitophagy in response to mitochondrial depolarization	GO:0098779	0.0593	0.269	A0A3Q2UCH4|1.308620615	1	11	121	21829	http://www.ebi.ac.uk/QuickGO/GTerm?id=GO:0098779
6	5,6	regulation of membrane lipid metabolic process	GO:1905038	0.0593	0.269	ORMDL3|0.402916918	1	11	121	21829	http://www.ebi.ac.uk/QuickGO/GTerm?id=GO:1905038
5	5	oxoacid metabolic process	GO:0043436	0.0596	0.269	ENO1|1.301513562;ACAT1|1.26178047;GPI|1.354148803;SDHA|1.217654696;PGK1|1.22553449;LDHA|1.406541698;ENO3|1.243593921;BLMH|1.469427111;ALDOC|1.365001997;MTHFD1L|0.749713642	10	1028	121	21829	http://www.ebi.ac.uk/QuickGO/GTerm?id=GO:0043436
10	7,8,9,10	negative regulation of actin filament polymerization	GO:0030837	0.0606	0.271	LMOD3|1.522555731;CAPZA2|1.308764545	2	72	121	21829	http://www.ebi.ac.uk/QuickGO/GTerm?id=GO:0030837
7	6,7	translational elongation	GO:0006414	0.0606	0.271	EEF1B2|1.322594905;DPH5|0.719312178	2	72	121	21829	http://www.ebi.ac.uk/QuickGO/GTerm?id=GO:0006414
8	4,7,8	regulation of heart rate	GO:0002027	0.0606	0.271	A0A3Q3ATJ1|1.201501275;FKBP12.6|0.773369444	2	72	121	21829	http://www.ebi.ac.uk/QuickGO/GTerm?id=GO:0002027
5	4,5	intracellular transport	GO:0046907	0.0608	0.272	RYR3|1.208753681;UCH-L1|1.43716929;HSPB1|1.337774448;RANBP1|1.340088175;KPNA4|1.24977891;RAB5C|2.549741805;TIMM13|1.33072494;BCAP31|0.807755804;VPS29|0.751790268;A0A3Q2U769|0.584188784;SAMM50|0.563408826;LOC100859860|0.744437258;KPNA3|0.806756534;FKBP12.6|0.773369444	14	1605	121	21829	http://www.ebi.ac.uk/QuickGO/GTerm?id=GO:0046907
10	7,9,10	regulation of actin filament depolymerization	GO:0030834	0.0621	0.273	LMOD3|1.522555731;CAPZA2|1.308764545	2	73	121	21829	http://www.ebi.ac.uk/QuickGO/GTerm?id=GO:0030834
6	6	skeletal muscle cell differentiation	GO:0035914	0.0621	0.273	KBTBD10|1.353350665;SMYD1|1.332742776	2	73	121	21829	http://www.ebi.ac.uk/QuickGO/GTerm?id=GO:0035914
4	4	midbrain development	GO:0030901	0.0621	0.273	ATP5F1|1.373436785;MBP|0.690656099	2	73	121	21829	http://www.ebi.ac.uk/QuickGO/GTerm?id=GO:0030901
4	4	response to oxidative stress	GO:0006979	0.0622	0.273	PRDX6|1.247143535;HSPB1|1.337774448;KPNA4|1.24977891;FKBP12.6|0.773369444	4	268	121	21829	http://www.ebi.ac.uk/QuickGO/GTerm?id=GO:0006979
10	6,7,9,10	regulation of actin filament polymerization	GO:0030833	0.0623	0.273	LMOD3|1.522555731;CAPZA2|1.308764545;GMFB|0.703153051	3	163	121	21829	http://www.ebi.ac.uk/QuickGO/GTerm?id=GO:0030833
4	4	organic acid metabolic process	GO:0006082	0.064	0.273	ENO1|1.301513562;ACAT1|1.26178047;GPI|1.354148803;SDHA|1.217654696;PGK1|1.22553449;LDHA|1.406541698;ENO3|1.243593921;BLMH|1.469427111;ALDOC|1.365001997;MTHFD1L|0.749713642	10	1042	121	21829	http://www.ebi.ac.uk/QuickGO/GTerm?id=GO:0006082
5	5	muscle organ development	GO:0007517	0.0642	0.273	KBTBD10|1.353350665;LMOD3|1.522555731;SMYD1|1.332742776;FLNB|0.613099367	4	271	121	21829	http://www.ebi.ac.uk/QuickGO/GTerm?id=GO:0007517
6	5,6	positive regulation of interleukin-1 production	GO:0032732	0.0645	0.273	HSPB1|1.337774448	1	12	121	21829	http://www.ebi.ac.uk/QuickGO/GTerm?id=GO:0032732
8	6,7,8	positive regulation of mitophagy	GO:1903599	0.0645	0.273	A0A3Q2UCH4|1.308620615	1	12	121	21829	http://www.ebi.ac.uk/QuickGO/GTerm?id=GO:1903599
10	9,10	tRNA splicing, via endonucleolytic cleavage and ligation	GO:0006388	0.0645	0.273	RTCB|1.284666414	1	12	121	21829	http://www.ebi.ac.uk/QuickGO/GTerm?id=GO:0006388
9	7,8,9	NLS-bearing protein import into nucleus	GO:0006607	0.0645	0.273	KPNA3|0.806756534	1	12	121	21829	http://www.ebi.ac.uk/QuickGO/GTerm?id=GO:0006607
5	5	cofactor catabolic process	GO:0051187	0.0645	0.273	ACAT1|1.26178047	1	12	121	21829	http://www.ebi.ac.uk/QuickGO/GTerm?id=GO:0051187
4	4	protein refolding	GO:0042026	0.0645	0.273	HSP70|1.283172572	1	12	121	21829	http://www.ebi.ac.uk/QuickGO/GTerm?id=GO:0042026
6	6	photoperiodism	GO:0009648	0.0645	0.273	PPP1CB|0.799006051	1	12	121	21829	http://www.ebi.ac.uk/QuickGO/GTerm?id=GO:0009648
5	5	inositol phosphate dephosphorylation	GO:0046855	0.0645	0.273	IMPA1|1.338855168	1	12	121	21829	http://www.ebi.ac.uk/QuickGO/GTerm?id=GO:0046855
7	5,6,7	phosphorylated carbohydrate dephosphorylation	GO:0046838	0.0645	0.273	IMPA1|1.338855168	1	12	121	21829	http://www.ebi.ac.uk/QuickGO/GTerm?id=GO:0046838
9	7,8,9	regulation of cardiac muscle contraction by calcium ion signaling	GO:0010882	0.0645	0.273	FKBP12.6|0.773369444	1	12	121	21829	http://www.ebi.ac.uk/QuickGO/GTerm?id=GO:0010882
7	6,7	negative regulation of calcium-mediated signaling	GO:0050849	0.0645	0.273	FKBP12.6|0.773369444	1	12	121	21829	http://www.ebi.ac.uk/QuickGO/GTerm?id=GO:0050849
6	5,6	entrainment of circadian clock by photoperiod	GO:0043153	0.0645	0.273	PPP1CB|0.799006051	1	12	121	21829	http://www.ebi.ac.uk/QuickGO/GTerm?id=GO:0043153
4	4	ketone body metabolic process	GO:1902224	0.0645	0.273	ACAT1|1.26178047	1	12	121	21829	http://www.ebi.ac.uk/QuickGO/GTerm?id=GO:1902224
7	6,7	positive regulation of interleukin-1 beta production	GO:0032731	0.0645	0.273	HSPB1|1.337774448	1	12	121	21829	http://www.ebi.ac.uk/QuickGO/GTerm?id=GO:0032731
8	7,8	protein polymerization	GO:0051258	0.0649	0.274	LMOD3|1.522555731;CAPZA2|1.308764545;GMFB|0.703153051;FGB|0.807555904	4	272	121	21829	http://www.ebi.ac.uk/QuickGO/GTerm?id=GO:0051258
9	8,9	actin filament depolymerization	GO:0030042	0.0666	0.28	LMOD3|1.522555731;CAPZA2|1.308764545	2	76	121	21829	http://www.ebi.ac.uk/QuickGO/GTerm?id=GO:0030042
6	4,6	positive regulation of epithelial cell migration	GO:0010634	0.0666	0.28	HSPB1|1.337774448;GLIPR2|0.785712158	2	76	121	21829	http://www.ebi.ac.uk/QuickGO/GTerm?id=GO:0010634
8	5,6,8	negative regulation of protein complex disassembly	GO:0043242	0.0697	0.283	LMOD3|1.522555731;CAPZA2|1.308764545	2	78	121	21829	http://www.ebi.ac.uk/QuickGO/GTerm?id=GO:0043242
9	6,7,9	negative regulation of protein depolymerization	GO:1901880	0.0697	0.283	LMOD3|1.522555731;CAPZA2|1.308764545	2	78	121	21829	http://www.ebi.ac.uk/QuickGO/GTerm?id=GO:1901880
6	6	monosaccharide biosynthetic process	GO:0046364	0.0697	0.283	GPI|1.354148803;ENO3|1.243593921	2	78	121	21829	http://www.ebi.ac.uk/QuickGO/GTerm?id=GO:0046364
7	6,7	folic acid-containing compound biosynthetic process	GO:0009396	0.0697	0.283	MTHFD1L|0.749713642	1	13	121	21829	http://www.ebi.ac.uk/QuickGO/GTerm?id=GO:0009396
11	7,8,9,10,11	positive regulation of mRNA splicing, via spliceosome	GO:0048026	0.0697	0.283	PRDX6|1.247143535	1	13	121	21829	http://www.ebi.ac.uk/QuickGO/GTerm?id=GO:0048026
4	4	negative regulation of muscle contraction	GO:0045932	0.0697	0.283	ATP2A1|1.2337889	1	13	121	21829	http://www.ebi.ac.uk/QuickGO/GTerm?id=GO:0045932
7	7	membrane depolarization during cardiac muscle cell action potential	GO:0086012	0.0697	0.283	A0A3Q3ATJ1|1.201501275	1	13	121	21829	http://www.ebi.ac.uk/QuickGO/GTerm?id=GO:0086012
7	5,7	heterochromatin organization	GO:0070828	0.0697	0.283	HP1BP3|0.72359077	1	13	121	21829	http://www.ebi.ac.uk/QuickGO/GTerm?id=GO:0070828
4	4	eating behavior	GO:0042755	0.0697	0.283	UCH-L1|1.43716929	1	13	121	21829	http://www.ebi.ac.uk/QuickGO/GTerm?id=GO:0042755
4	4	response to ischemia	GO:0002931	0.0697	0.283	UCH-L1|1.43716929	1	13	121	21829	http://www.ebi.ac.uk/QuickGO/GTerm?id=GO:0002931
8	6,7,8	negative regulation of oxidative stress-induced intrinsic apoptotic signaling pathway	GO:1902176	0.0697	0.283	HSPB1|1.337774448	1	13	121	21829	http://www.ebi.ac.uk/QuickGO/GTerm?id=GO:1902176
9	8,9	RNA splicing, via endonucleolytic cleavage and ligation	GO:0000394	0.0697	0.283	RTCB|1.284666414	1	13	121	21829	http://www.ebi.ac.uk/QuickGO/GTerm?id=GO:0000394
8	5,6,8	inositol phosphate catabolic process	GO:0071545	0.0697	0.283	IMPA1|1.338855168	1	13	121	21829	http://www.ebi.ac.uk/QuickGO/GTerm?id=GO:0071545
3	3	response to redox state	GO:0051775	0.0697	0.283	FKBP12.6|0.773369444	1	13	121	21829	http://www.ebi.ac.uk/QuickGO/GTerm?id=GO:0051775
4	4	negative regulation of sequestering of calcium ion	GO:0051283	0.0713	0.286	RYR3|1.208753681;FKBP12.6|0.773369444	2	79	121	21829	http://www.ebi.ac.uk/QuickGO/GTerm?id=GO:0051283
4	4	regulation of sequestering of calcium ion	GO:0051282	0.0713	0.286	RYR3|1.208753681;FKBP12.6|0.773369444	2	79	121	21829	http://www.ebi.ac.uk/QuickGO/GTerm?id=GO:0051282
5	5	release of sequestered calcium ion into cytosol	GO:0051209	0.0713	0.286	RYR3|1.208753681;FKBP12.6|0.773369444	2	79	121	21829	http://www.ebi.ac.uk/QuickGO/GTerm?id=GO:0051209
4	4	oxidation-reduction process	GO:0055114	0.0718	0.286	DHRS7C|1.334774673;TXNRD3|1.204580616;ACAT1|1.26178047;PRDX6|1.247143535;SDHA|1.217654696;CYB5R3|1.501083223;LDHA|1.406541698;COX7C|1.254685321;A0A3Q3AUQ1|0.818305002;MTHFD1L|0.749713642;PPP1CB|0.799006051;GLRX5|0.502973712	12	1352	121	21829	http://www.ebi.ac.uk/QuickGO/GTerm?id=GO:0055114
5	4,5	establishment of protein localization	GO:0045184	0.072	0.286	GPI|1.354148803;HSPB1|1.337774448;RANBP1|1.340088175;KPNA4|1.24977891;RAB5C|2.549741805;TIMM13|1.33072494;BCAP31|0.807755804;VPS29|0.751790268;A0A3Q2U769|0.584188784;SAMM50|0.563408826;KPNA3|0.806756534;PRKCA|0.487532754;FKBP12.6|0.773369444	13	1499	121	21829	http://www.ebi.ac.uk/QuickGO/GTerm?id=GO:0045184
5	5	circulatory system development	GO:0072359	0.0723	0.286	PDLIM3|1.286425032;MYPN|1.223593919;HSPB1|1.337774448;SMYD1|1.332742776;A0A3Q2U769|0.584188784;LAMA4|0.797937472;FBLN2|0.537261949;FKBP12.6|0.773369444	8	789	121	21829	http://www.ebi.ac.uk/QuickGO/GTerm?id=GO:0072359
8	6,8	alpha-amino acid catabolic process	GO:1901606	0.0728	0.286	ACAT1|1.26178047;BLMH|1.469427111	2	80	121	21829	http://www.ebi.ac.uk/QuickGO/GTerm?id=GO:1901606
11	5,6,10,11	sequestering of calcium ion	GO:0051208	0.0728	0.286	RYR3|1.208753681;FKBP12.6|0.773369444	2	80	121	21829	http://www.ebi.ac.uk/QuickGO/GTerm?id=GO:0051208
9	6,7,8,9	negative regulation of protein polymerization	GO:0032272	0.0728	0.286	LMOD3|1.522555731;CAPZA2|1.308764545	2	80	121	21829	http://www.ebi.ac.uk/QuickGO/GTerm?id=GO:0032272
4	4	regulation of cellular component organization	GO:0051128	0.0733	0.286	A0A3Q2UCH4|1.308620615;LMOD3|1.522555731;MYOM1|1.254881107;MYPN|1.223593919;ENSGALG00000002907|1.322866394;CAPZA2|1.308764545;RANBP1|1.340088175;SH3KBP1|1.234699811;HSP70|1.283172572;RAB5C|2.549741805;ENSGALG00000027330|1.235499055;GMFB|0.703153051;SUB1|0.814720615;FKBP12.6|0.773369444;DPYSL2|0.795640031;GLIPR2|0.785712158	16	1953	121	21829	http://www.ebi.ac.uk/QuickGO/GTerm?id=GO:0051128
6	4,5,6	positive regulation of protein complex assembly	GO:0031334	0.0736	0.286	LMOD3|1.522555731;GMFB|0.703153051;SUB1|0.814720615	3	175	121	21829	http://www.ebi.ac.uk/QuickGO/GTerm?id=GO:0031334
9	8,9	actin filament polymerization	GO:0030041	0.0736	0.286	LMOD3|1.522555731;CAPZA2|1.308764545;GMFB|0.703153051	3	175	121	21829	http://www.ebi.ac.uk/QuickGO/GTerm?id=GO:0030041
5	5	platelet activation	GO:0030168	0.0744	0.286	HSPB1|1.337774448;FGB|0.807555904	2	81	121	21829	http://www.ebi.ac.uk/QuickGO/GTerm?id=GO:0030168
8	6,8	nucleosome assembly	GO:0006334	0.0744	0.286	P08286|0.677683947;HP1BP3|0.72359077	2	81	121	21829	http://www.ebi.ac.uk/QuickGO/GTerm?id=GO:0006334
8	6,7,8	interferon-gamma-mediated signaling pathway	GO:0060333	0.0749	0.286	A0A3Q2UCH4|1.308620615	1	14	121	21829	http://www.ebi.ac.uk/QuickGO/GTerm?id=GO:0060333
5	5	mitotic centrosome separation	GO:0007100	0.0749	0.286	RANBP1|1.340088175	1	14	121	21829	http://www.ebi.ac.uk/QuickGO/GTerm?id=GO:0007100
7	7	dicarboxylic acid biosynthetic process	GO:0043650	0.0749	0.286	MTHFD1L|0.749713642	1	14	121	21829	http://www.ebi.ac.uk/QuickGO/GTerm?id=GO:0043650
7	5,7	negative regulation of heart contraction	GO:0045822	0.0749	0.286	FKBP12.6|0.773369444	1	14	121	21829	http://www.ebi.ac.uk/QuickGO/GTerm?id=GO:0045822
6	6	response to progesterone	GO:0032570	0.0749	0.286	HSP70|1.283172572	1	14	121	21829	http://www.ebi.ac.uk/QuickGO/GTerm?id=GO:0032570
4	4	centrosome separation	GO:0051299	0.0749	0.286	RANBP1|1.340088175	1	14	121	21829	http://www.ebi.ac.uk/QuickGO/GTerm?id=GO:0051299
7	7	protein-cofactor linkage	GO:0018065	0.0749	0.286	GLRX5|0.502973712	1	14	121	21829	http://www.ebi.ac.uk/QuickGO/GTerm?id=GO:0018065
5	5	regulation of endothelial cell chemotaxis	GO:2001026	0.0749	0.286	HSPB1|1.337774448	1	14	121	21829	http://www.ebi.ac.uk/QuickGO/GTerm?id=GO:2001026
12	8,9,11,12	regulation of Arp2/3 complex-mediated actin nucleation	GO:0034315	0.0749	0.286	GMFB|0.703153051	1	14	121	21829	http://www.ebi.ac.uk/QuickGO/GTerm?id=GO:0034315
9	6,7,8,9	regulation of type I interferon-mediated signaling pathway	GO:0060338	0.0749	0.286	A0A3Q2UCH4|1.308620615	1	14	121	21829	http://www.ebi.ac.uk/QuickGO/GTerm?id=GO:0060338
7	6,7	DNA double-strand break processing	GO:0000729	0.0749	0.286	UBE2V2|1.250642582	1	14	121	21829	http://www.ebi.ac.uk/QuickGO/GTerm?id=GO:0000729
7	4,5,6,7	regulation of sphingolipid biosynthetic process	GO:0090153	0.0749	0.286	ORMDL3|0.402916918	1	14	121	21829	http://www.ebi.ac.uk/QuickGO/GTerm?id=GO:0090153
8	6,8	regulation of kinase activity	GO:0043549	0.076	0.289	A0A3Q2UCH4|1.308620615;A0A3Q3AZP2|1.434367428;UCH-L1|1.43716929;HSPB1|1.337774448;HSP70|1.283172572;CAB39|1.21239245;PRKAB2|0.71569607	7	663	121	21829	http://www.ebi.ac.uk/QuickGO/GTerm?id=GO:0043549
3	3	cellular detoxification	GO:1990748	0.0776	0.294	TXNRD3|1.204580616;PRDX6|1.247143535	2	83	121	21829	http://www.ebi.ac.uk/QuickGO/GTerm?id=GO:1990748
4	4	cellular oxidant detoxification	GO:0098869	0.0776	0.294	TXNRD3|1.204580616;PRDX6|1.247143535	2	83	121	21829	http://www.ebi.ac.uk/QuickGO/GTerm?id=GO:0098869
7	5,6,7	intracellular protein transport	GO:0006886	0.0788	0.298	HSPB1|1.337774448;RANBP1|1.340088175;KPNA4|1.24977891;RAB5C|2.549741805;TIMM13|1.33072494;BCAP31|0.807755804;A0A3Q2U769|0.584188784;SAMM50|0.563408826;KPNA3|0.806756534	9	943	121	21829	http://www.ebi.ac.uk/QuickGO/GTerm?id=GO:0006886
2	2	detoxification	GO:0098754	0.0792	0.298	TXNRD3|1.204580616;PRDX6|1.247143535	2	84	121	21829	http://www.ebi.ac.uk/QuickGO/GTerm?id=GO:0098754
9	8,9	axonal transport	GO:0098930	0.08	0.298	HSPB1|1.337774448	1	15	121	21829	http://www.ebi.ac.uk/QuickGO/GTerm?id=GO:0098930
9	8,9	positive regulation of peptidyl-threonine phosphorylation	GO:0010800	0.08	0.298	CAB39|1.21239245	1	15	121	21829	http://www.ebi.ac.uk/QuickGO/GTerm?id=GO:0010800
11	6,10,11	regulation of release of sequestered calcium ion into cytosol by sarcoplasmic reticulum	GO:0010880	0.08	0.298	FKBP12.6|0.773369444	1	15	121	21829	http://www.ebi.ac.uk/QuickGO/GTerm?id=GO:0010880
9	5,6,8,9	regulation of ryanodine-sensitive calcium-release channel activity	GO:0060314	0.08	0.298	FKBP12.6|0.773369444	1	15	121	21829	http://www.ebi.ac.uk/QuickGO/GTerm?id=GO:0060314
8	7,8	release of sequestered calcium ion into cytosol by sarcoplasmic reticulum	GO:0014808	0.08	0.298	FKBP12.6|0.773369444	1	15	121	21829	http://www.ebi.ac.uk/QuickGO/GTerm?id=GO:0014808
9	8,9	purine ribonucleoside triphosphate biosynthetic process	GO:0009206	0.0808	0.3	ENO1|1.301513562;ATP5F1|1.373436785	2	85	121	21829	http://www.ebi.ac.uk/QuickGO/GTerm?id=GO:0009206
5	5	organonitrogen compound catabolic process	GO:1901565	0.0809	0.3	UCH-L1|1.43716929;ACAT1|1.26178047;PSMD6|1.32702021;BLMH|1.469427111;RANBP1|1.340088175;CUL2|0.771088233;XPNPEP1|0.544019076;Rchy1|0.707606765	8	809	121	21829	http://www.ebi.ac.uk/QuickGO/GTerm?id=GO:1901565
5	5	regulation of actin filament length	GO:0030832	0.0817	0.302	LMOD3|1.522555731;CAPZA2|1.308764545;GMFB|0.703153051	3	183	121	21829	http://www.ebi.ac.uk/QuickGO/GTerm?id=GO:0030832
9	6,8,9	regulation of actin polymerization or depolymerization	GO:0008064	0.0817	0.302	LMOD3|1.522555731;CAPZA2|1.308764545;GMFB|0.703153051	3	183	121	21829	http://www.ebi.ac.uk/QuickGO/GTerm?id=GO:0008064
6	6	myelination	GO:0042552	0.0825	0.304	MBP|0.690656099;MPZ|0.531735444	2	86	121	21829	http://www.ebi.ac.uk/QuickGO/GTerm?id=GO:0042552
7	5,6,7	establishment of protein localization to organelle	GO:0072594	0.0826	0.304	RANBP1|1.340088175;KPNA4|1.24977891;TIMM13|1.33072494;SAMM50|0.563408826;KPNA3|0.806756534	5	417	121	21829	http://www.ebi.ac.uk/QuickGO/GTerm?id=GO:0072594
6	5,6	single-organism intracellular transport	GO:1902582	0.084	0.306	RYR3|1.208753681;UCH-L1|1.43716929;HSPB1|1.337774448;RANBP1|1.340088175;KPNA4|1.24977891;TIMM13|1.33072494;SAMM50|0.563408826;LOC100859860|0.744437258;KPNA3|0.806756534;FKBP12.6|0.773369444	10	1098	121	21829	http://www.ebi.ac.uk/QuickGO/GTerm?id=GO:1902582
8	7,8	purine nucleoside triphosphate biosynthetic process	GO:0009145	0.0841	0.306	ENO1|1.301513562;ATP5F1|1.373436785	2	87	121	21829	http://www.ebi.ac.uk/QuickGO/GTerm?id=GO:0009145
6	6	neural tube closure	GO:0001843	0.0841	0.306	A0A3Q2U769|0.584188784;MTHFD1L|0.749713642	2	87	121	21829	http://www.ebi.ac.uk/QuickGO/GTerm?id=GO:0001843
9	5,6,8,9	regulation of protein polymerization	GO:0032271	0.0848	0.306	LMOD3|1.522555731;CAPZA2|1.308764545;GMFB|0.703153051	3	186	121	21829	http://www.ebi.ac.uk/QuickGO/GTerm?id=GO:0032271
7	6,7	cellular response to type I interferon	GO:0071357	0.0851	0.306	A0A3Q2UCH4|1.308620615	1	16	121	21829	http://www.ebi.ac.uk/QuickGO/GTerm?id=GO:0071357
5	5	disruption of cells of other organism	GO:0044364	0.0851	0.306	ALB|1.487005807	1	16	121	21829	http://www.ebi.ac.uk/QuickGO/GTerm?id=GO:0044364
7	6,7	calcium ion transport from endoplasmic reticulum to cytosol	GO:1903514	0.0851	0.306	FKBP12.6|0.773369444	1	16	121	21829	http://www.ebi.ac.uk/QuickGO/GTerm?id=GO:1903514
8	6,7,8	type I interferon signaling pathway	GO:0060337	0.0851	0.306	A0A3Q2UCH4|1.308620615	1	16	121	21829	http://www.ebi.ac.uk/QuickGO/GTerm?id=GO:0060337
3	3	killing of cells of other organism	GO:0031640	0.0851	0.306	ALB|1.487005807	1	16	121	21829	http://www.ebi.ac.uk/QuickGO/GTerm?id=GO:0031640
7	7	protein deneddylation	GO:0000338	0.0851	0.306	COPS7B|0.663774909	1	16	121	21829	http://www.ebi.ac.uk/QuickGO/GTerm?id=GO:0000338
8	7,8	proteasome assembly	GO:0043248	0.0851	0.306	PSMD11|1.440547778	1	16	121	21829	http://www.ebi.ac.uk/QuickGO/GTerm?id=GO:0043248
5	5	tube closure	GO:0060606	0.0858	0.306	A0A3Q2U769|0.584188784;MTHFD1L|0.749713642	2	88	121	21829	http://www.ebi.ac.uk/QuickGO/GTerm?id=GO:0060606
5	5	axon ensheathment	GO:0008366	0.0858	0.306	MBP|0.690656099;MPZ|0.531735444	2	88	121	21829	http://www.ebi.ac.uk/QuickGO/GTerm?id=GO:0008366
4	4	ensheathment of neurons	GO:0007272	0.0858	0.306	MBP|0.690656099;MPZ|0.531735444	2	88	121	21829	http://www.ebi.ac.uk/QuickGO/GTerm?id=GO:0007272
7	5,7	cellular amino acid catabolic process	GO:0009063	0.0874	0.312	ACAT1|1.26178047;BLMH|1.469427111	2	89	121	21829	http://www.ebi.ac.uk/QuickGO/GTerm?id=GO:0009063
8	7,8	cristae formation	GO:0042407	0.0902	0.318	SAMM50|0.563408826	1	17	121	21829	http://www.ebi.ac.uk/QuickGO/GTerm?id=GO:0042407
4	4	post-anal tail morphogenesis	GO:0036342	0.0902	0.318	A0A3Q2U769|0.584188784	1	17	121	21829	http://www.ebi.ac.uk/QuickGO/GTerm?id=GO:0036342
10	6,7,9,10	positive regulation of blood vessel endothelial cell migration	GO:0043536	0.0902	0.318	HSPB1|1.337774448	1	17	121	21829	http://www.ebi.ac.uk/QuickGO/GTerm?id=GO:0043536
6	6	regulation of long-term neuronal synaptic plasticity	GO:0048169	0.0902	0.318	ENSGALG00000027330|1.235499055	1	17	121	21829	http://www.ebi.ac.uk/QuickGO/GTerm?id=GO:0048169
6	5,6	response to type I interferon	GO:0034340	0.0902	0.318	A0A3Q2UCH4|1.308620615	1	17	121	21829	http://www.ebi.ac.uk/QuickGO/GTerm?id=GO:0034340
5	5	action potential	GO:0001508	0.0908	0.319	A0A3Q3ATJ1|1.201501275;FKBP12.6|0.773369444	2	91	121	21829	http://www.ebi.ac.uk/QuickGO/GTerm?id=GO:0001508
9	6,7,8,9	regulation of mRNA processing	GO:0050684	0.0908	0.319	PRDX6|1.247143535;SRSF2|0.465409726	2	91	121	21829	http://www.ebi.ac.uk/QuickGO/GTerm?id=GO:0050684
5	4,5	sequestering of metal ion	GO:0051238	0.0942	0.327	RYR3|1.208753681;FKBP12.6|0.773369444	2	93	121	21829	http://www.ebi.ac.uk/QuickGO/GTerm?id=GO:0051238
8	6,8	primary neural tube formation	GO:0014020	0.0942	0.327	A0A3Q2U769|0.584188784;MTHFD1L|0.749713642	2	93	121	21829	http://www.ebi.ac.uk/QuickGO/GTerm?id=GO:0014020
7	6,7	calcium ion transport into cytosol	GO:0060402	0.0942	0.327	RYR3|1.208753681;FKBP12.6|0.773369444	2	93	121	21829	http://www.ebi.ac.uk/QuickGO/GTerm?id=GO:0060402
8	6,8	regulation of protein depolymerization	GO:1901879	0.0942	0.327	LMOD3|1.522555731;CAPZA2|1.308764545	2	93	121	21829	http://www.ebi.ac.uk/QuickGO/GTerm?id=GO:1901879
6	5,6	regulation of insulin-like growth factor receptor signaling pathway	GO:0043567	0.0952	0.327	CILP|1.39877359	1	18	121	21829	http://www.ebi.ac.uk/QuickGO/GTerm?id=GO:0043567
5	4,5	entrainment of circadian clock	GO:0009649	0.0952	0.327	PPP1CB|0.799006051	1	18	121	21829	http://www.ebi.ac.uk/QuickGO/GTerm?id=GO:0009649
8	6,8	branched-chain amino acid catabolic process	GO:0009083	0.0952	0.327	ACAT1|1.26178047	1	18	121	21829	http://www.ebi.ac.uk/QuickGO/GTerm?id=GO:0009083
7	6,7	sarcoplasmic reticulum calcium ion transport	GO:0070296	0.0952	0.327	FKBP12.6|0.773369444	1	18	121	21829	http://www.ebi.ac.uk/QuickGO/GTerm?id=GO:0070296
5	5	branched-chain amino acid metabolic process	GO:0009081	0.0952	0.327	ACAT1|1.26178047	1	18	121	21829	http://www.ebi.ac.uk/QuickGO/GTerm?id=GO:0009081
5	5	cell-cell signaling involved in cardiac conduction	GO:0086019	0.0952	0.327	A0A3Q3ATJ1|1.201501275	1	18	121	21829	http://www.ebi.ac.uk/QuickGO/GTerm?id=GO:0086019
9	6,7,8,9	negative regulation of calcium ion transmembrane transporter activity	GO:1901020	0.0952	0.327	FKBP12.6|0.773369444	1	18	121	21829	http://www.ebi.ac.uk/QuickGO/GTerm?id=GO:1901020
3	3	anatomical structure formation involved in morphogenesis	GO:0048646	0.0968	0.331	KBTBD10|1.353350665;LMOD3|1.522555731;GPI|1.354148803;MYOM2|1.223302409;MYPN|1.223593919;HSPB1|1.337774448;MYBPC2|1.243510197;A0A3Q2U769|0.584188784;MTHFD1L|0.749713642	9	985	121	21829	http://www.ebi.ac.uk/QuickGO/GTerm?id=GO:0048646
8	6,7,8	regulation of RNA splicing	GO:0043484	0.0976	0.333	PRDX6|1.247143535;SRSF2|0.465409726	2	95	121	21829	http://www.ebi.ac.uk/QuickGO/GTerm?id=GO:0043484
5	5	chromatin assembly	GO:0031497	0.0976	0.333	P08286|0.677683947;HP1BP3|0.72359077	2	95	121	21829	http://www.ebi.ac.uk/QuickGO/GTerm?id=GO:0031497
8	7,8	epithelial to mesenchymal transition	GO:0001837	0.0994	0.336	FBLN2|0.537261949;GLIPR2|0.785712158	2	96	121	21829	http://www.ebi.ac.uk/QuickGO/GTerm?id=GO:0001837
7	7	polyol catabolic process	GO:0046174	0.1	0.336	IMPA1|1.338855168	1	19	121	21829	http://www.ebi.ac.uk/QuickGO/GTerm?id=GO:0046174
5	5	modification by symbiont of host morphology or physiology	GO:0044003	0.1	0.336	ALB|1.487005807	1	19	121	21829	http://www.ebi.ac.uk/QuickGO/GTerm?id=GO:0044003
10	6,7,8,9,10	positive regulation of transcription initiation from RNA polymerase II promoter	GO:0060261	0.1	0.336	SUB1|0.814720615	1	19	121	21829	http://www.ebi.ac.uk/QuickGO/GTerm?id=GO:0060261
11	6,7,8,9,11	positive regulation of phosphatidylinositol 3-kinase activity	GO:0043552	0.1	0.336	A0A3Q3AZP2|1.434367428	1	19	121	21829	http://www.ebi.ac.uk/QuickGO/GTerm?id=GO:0043552
8	6,8	negative regulation of calcium ion transmembrane transport	GO:1903170	0.1	0.336	FKBP12.6|0.773369444	1	19	121	21829	http://www.ebi.ac.uk/QuickGO/GTerm?id=GO:1903170
6	4,6	negative regulation of blood circulation	GO:1903523	0.1	0.336	FKBP12.6|0.773369444	1	19	121	21829	http://www.ebi.ac.uk/QuickGO/GTerm?id=GO:1903523
7	6,7	skeletal muscle contraction	GO:0003009	0.1	0.336	ATP2A1|1.2337889	1	19	121	21829	http://www.ebi.ac.uk/QuickGO/GTerm?id=GO:0003009
4	4	circulatory system process	GO:0003013	0.102	0.34	A0A3Q2UEL1|1.305534201;A0A3Q3ATJ1|1.201501275;TPM1|1.390357267;FKBP12.6|0.773369444	4	319	121	21829	http://www.ebi.ac.uk/QuickGO/GTerm?id=GO:0003013
5	5	positive regulation of organelle organization	GO:0010638	0.102	0.34	A0A3Q2UCH4|1.308620615;LMOD3|1.522555731;RANBP1|1.340088175;ENSGALG00000027330|1.235499055;GMFB|0.703153051	5	445	121	21829	http://www.ebi.ac.uk/QuickGO/GTerm?id=GO:0010638
4	4	regulation of cellular component size	GO:0032535	0.103	0.341	LMOD3|1.522555731;CAPZA2|1.308764545;GMFB|0.703153051;DPYSL2|0.795640031	4	320	121	21829	http://www.ebi.ac.uk/QuickGO/GTerm?id=GO:0032535
3	3	regulation of biological quality	GO:0065008	0.103	0.341	RYR3|1.208753681;TXNRD3|1.204580616;A0A3Q3ATJ1|1.201501275;LMOD3|1.522555731;PRDX6|1.247143535;AMPD3|1.306784743;GPI|1.354148803;HSPB1|1.337774448;ALB|1.487005807;CAPZA2|1.308764545;SH3KBP1|1.234699811;HSP70|1.283172572;ENSGALG00000027330|1.235499055;GMFB|0.703153051;ERP44|0.745186445;FGB|0.807555904;PRKCA|0.487532754;GLRX5|0.502973712;FKBP12.6|0.773369444;DPYSL2|0.795640031;ORMDL3|0.402916918	21	2843	121	21829	http://www.ebi.ac.uk/QuickGO/GTerm?id=GO:0065008
5	4,5	positive regulation of cellular component organization	GO:0051130	0.103	0.342	A0A3Q2UCH4|1.308620615;LMOD3|1.522555731;RANBP1|1.340088175;ENSGALG00000027330|1.235499055;GMFB|0.703153051;SUB1|0.814720615;FKBP12.6|0.773369444;GLIPR2|0.785712158	8	856	121	21829	http://www.ebi.ac.uk/QuickGO/GTerm?id=GO:0051130
8	6,7,8	protein import into nucleus	GO:0006606	0.103	0.342	RANBP1|1.340088175;KPNA4|1.24977891;KPNA3|0.806756534	3	203	121	21829	http://www.ebi.ac.uk/QuickGO/GTerm?id=GO:0006606
8	6,7,8	protein targeting to nucleus	GO:0044744	0.103	0.342	RANBP1|1.340088175;KPNA4|1.24977891;KPNA3|0.806756534	3	203	121	21829	http://www.ebi.ac.uk/QuickGO/GTerm?id=GO:0044744
5	5	ion transport	GO:0006811	0.104	0.344	RYR3|1.208753681;ATP2B4|1.454010951;ATP2B2|1.385296881;A0A3Q2TTX7|1.32240644;CATSPER2|1.202421769;A0A3Q3ATJ1|1.201501275;A0A3Q3AZP2|1.434367428;ATP5F1|1.373436785;ATP2A1|1.2337889;HSP70|1.283172572;COX7C|1.254685321;A0A3Q3AUQ1|0.818305002;FXYD6|0.766199089;FKBP12.6|0.773369444	14	1748	121	21829	http://www.ebi.ac.uk/QuickGO/GTerm?id=GO:0006811
7	6,7	tetrahydrofolate metabolic process	GO:0046653	0.105	0.344	MTHFD1L|0.749713642	1	20	121	21829	http://www.ebi.ac.uk/QuickGO/GTerm?id=GO:0046653
3	3	negative regulation of GTPase activity	GO:0034260	0.105	0.344	A0A3Q2U769|0.584188784	1	20	121	21829	http://www.ebi.ac.uk/QuickGO/GTerm?id=GO:0034260
10	9,10	NAD biosynthetic process	GO:0009435	0.105	0.344	PBEF1|0.760519451	1	20	121	21829	http://www.ebi.ac.uk/QuickGO/GTerm?id=GO:0009435
7	6,7	positive regulation of skeletal muscle tissue development	GO:0048643	0.105	0.344	LMOD3|1.522555731	1	20	121	21829	http://www.ebi.ac.uk/QuickGO/GTerm?id=GO:0048643
8	6,8	endothelial cell chemotaxis	GO:0035767	0.105	0.344	HSPB1|1.337774448	1	20	121	21829	http://www.ebi.ac.uk/QuickGO/GTerm?id=GO:0035767
6	5,6	energy homeostasis	GO:0097009	0.105	0.344	AMPD3|1.306784743	1	20	121	21829	http://www.ebi.ac.uk/QuickGO/GTerm?id=GO:0097009
10	10	cytosolic calcium ion transport	GO:0060401	0.106	0.346	RYR3|1.208753681;FKBP12.6|0.773369444	2	100	121	21829	http://www.ebi.ac.uk/QuickGO/GTerm?id=GO:0060401
4	4	regulation of system process	GO:0044057	0.108	0.35	TNNT3|1.527716062;A0A3Q3ATJ1|1.201501275;ATP2A1|1.2337889;FKBP12.6|0.773369444	4	326	121	21829	http://www.ebi.ac.uk/QuickGO/GTerm?id=GO:0044057
7	5,7	nucleosome organization	GO:0034728	0.108	0.35	P08286|0.677683947;HP1BP3|0.72359077	2	101	121	21829	http://www.ebi.ac.uk/QuickGO/GTerm?id=GO:0034728
8	7,8	ribonucleoside triphosphate biosynthetic process	GO:0009201	0.108	0.35	ENO1|1.301513562;ATP5F1|1.373436785	2	101	121	21829	http://www.ebi.ac.uk/QuickGO/GTerm?id=GO:0009201
6	6	regulation of phosphatase activity	GO:0010921	0.108	0.35	PPP1R2|0.797609752;FKBP12.6|0.773369444	2	101	121	21829	http://www.ebi.ac.uk/QuickGO/GTerm?id=GO:0010921
10	9,10	IMP biosynthetic process	GO:0006188	0.11	0.353	AMPD3|1.306784743	1	21	121	21829	http://www.ebi.ac.uk/QuickGO/GTerm?id=GO:0006188
6	6	pteridine-containing compound biosynthetic process	GO:0042559	0.11	0.353	MTHFD1L|0.749713642	1	21	121	21829	http://www.ebi.ac.uk/QuickGO/GTerm?id=GO:0042559
10	6,7,8,9,10	negative regulation of cation channel activity	GO:2001258	0.11	0.353	FKBP12.6|0.773369444	1	21	121	21829	http://www.ebi.ac.uk/QuickGO/GTerm?id=GO:2001258
9	6,7,8,9	positive regulation of RNA splicing	GO:0033120	0.11	0.353	PRDX6|1.247143535	1	21	121	21829	http://www.ebi.ac.uk/QuickGO/GTerm?id=GO:0033120
7	6,7	regulation of interleukin-1 beta production	GO:0032651	0.11	0.353	HSPB1|1.337774448	1	21	121	21829	http://www.ebi.ac.uk/QuickGO/GTerm?id=GO:0032651
5	4,5	cellular component morphogenesis	GO:0032989	0.111	0.355	KBTBD10|1.353350665;UCH-L1|1.43716929;LMOD3|1.522555731;MYOM2|1.223302409;MYPN|1.223593919;MYBPC2|1.243510197;SH3KBP1|1.234699811;FLNB|0.613099367;DPYSL2|0.795640031;GLIPR2|0.785712158	10	1162	121	21829	http://www.ebi.ac.uk/QuickGO/GTerm?id=GO:0032989
8	7,8	actin polymerization or depolymerization	GO:0008154	0.111	0.355	LMOD3|1.522555731;CAPZA2|1.308764545;GMFB|0.703153051	3	210	121	21829	http://www.ebi.ac.uk/QuickGO/GTerm?id=GO:0008154
5	4,5	single-organism organelle organization	GO:1902589	0.112	0.357	KBTBD10|1.353350665;LMOD3|1.522555731;MYOM1|1.254881107;PDLIM3|1.286425032;MYOM2|1.223302409;MYPN|1.223593919;ENSGALG00000002907|1.322866394;TPM1|1.390357267;MYBPC2|1.243510197;CAPZA2|1.308764545;RANBP1|1.340088175;HSP70|1.283172572;TIMM13|1.33072494;ENSGALG00000027330|1.235499055;GMFB|0.703153051;SAMM50|0.563408826;FLNB|0.613099367	17	2238	121	21829	http://www.ebi.ac.uk/QuickGO/GTerm?id=GO:1902589
8	6,7,8	regulation of mRNA metabolic process	GO:1903311	0.114	0.359	PRDX6|1.247143535;SRSF2|0.465409726	2	104	121	21829	http://www.ebi.ac.uk/QuickGO/GTerm?id=GO:1903311
4	4	response to temperature stimulus	GO:0009266	0.114	0.359	CKM|1.28135235;HSP70|1.283172572	2	104	121	21829	http://www.ebi.ac.uk/QuickGO/GTerm?id=GO:0009266
7	6,7	protein targeting to mitochondrion	GO:0006626	0.114	0.359	TIMM13|1.33072494;SAMM50|0.563408826	2	104	121	21829	http://www.ebi.ac.uk/QuickGO/GTerm?id=GO:0006626
7	5,7	regulation of protein complex disassembly	GO:0043244	0.114	0.359	LMOD3|1.522555731;CAPZA2|1.308764545	2	104	121	21829	http://www.ebi.ac.uk/QuickGO/GTerm?id=GO:0043244
10	5,6,7,8,10	positive regulation of lipid kinase activity	GO:0090218	0.115	0.36	A0A3Q3AZP2|1.434367428	1	22	121	21829	http://www.ebi.ac.uk/QuickGO/GTerm?id=GO:0090218
10	9,10	anterograde axonal transport	GO:0008089	0.115	0.36	HSPB1|1.337774448	1	22	121	21829	http://www.ebi.ac.uk/QuickGO/GTerm?id=GO:0008089
10	6,7,8,9,10	positive regulation of calcium ion transmembrane transporter activity	GO:1901021	0.115	0.36	HSP70|1.283172572	1	22	121	21829	http://www.ebi.ac.uk/QuickGO/GTerm?id=GO:1901021
8	6,7,8	regulation of oxidative stress-induced intrinsic apoptotic signaling pathway	GO:1902175	0.115	0.36	HSPB1|1.337774448	1	22	121	21829	http://www.ebi.ac.uk/QuickGO/GTerm?id=GO:1902175
7	6,7	purine nucleobase biosynthetic process	GO:0009113	0.115	0.36	MTHFD1L|0.749713642	1	22	121	21829	http://www.ebi.ac.uk/QuickGO/GTerm?id=GO:0009113
10	6,7,9,10	positive regulation of actin filament polymerization	GO:0030838	0.115	0.36	LMOD3|1.522555731;GMFB|0.703153051	2	105	121	21829	http://www.ebi.ac.uk/QuickGO/GTerm?id=GO:0030838
8	6,7,8	protein targeting	GO:0006605	0.117	0.363	RANBP1|1.340088175;KPNA4|1.24977891;TIMM13|1.33072494;SAMM50|0.563408826;KPNA3|0.806756534	5	465	121	21829	http://www.ebi.ac.uk/QuickGO/GTerm?id=GO:0006605
7	5,7	neural tube formation	GO:0001841	0.117	0.363	A0A3Q2U769|0.584188784;MTHFD1L|0.749713642	2	106	121	21829	http://www.ebi.ac.uk/QuickGO/GTerm?id=GO:0001841
4	4	multicellular organismal signaling	GO:0035637	0.117	0.363	A0A3Q3ATJ1|1.201501275;FKBP12.6|0.773369444	2	106	121	21829	http://www.ebi.ac.uk/QuickGO/GTerm?id=GO:0035637
9	9	negative regulation of protein serine/threonine kinase activity	GO:0071901	0.117	0.363	UCH-L1|1.43716929;HSPB1|1.337774448	2	106	121	21829	http://www.ebi.ac.uk/QuickGO/GTerm?id=GO:0071901
5	5	regulation of transferase activity	GO:0051338	0.119	0.367	A0A3Q2UCH4|1.308620615;A0A3Q3AZP2|1.434367428;UCH-L1|1.43716929;HSPB1|1.337774448;HSP70|1.283172572;CAB39|1.21239245;PRKAB2|0.71569607	7	742	121	21829	http://www.ebi.ac.uk/QuickGO/GTerm?id=GO:0051338
4	4	erythrocyte homeostasis	GO:0034101	0.119	0.367	AMPD3|1.306784743;GPI|1.354148803	2	107	121	21829	http://www.ebi.ac.uk/QuickGO/GTerm?id=GO:0034101
6	5,6	regulation of axon regeneration	GO:0048679	0.12	0.367	FKBP12.6|0.773369444	1	23	121	21829	http://www.ebi.ac.uk/QuickGO/GTerm?id=GO:0048679
7	6,7	positive regulation of myoblast differentiation	GO:0045663	0.12	0.367	SMYD1|1.332742776	1	23	121	21829	http://www.ebi.ac.uk/QuickGO/GTerm?id=GO:0045663
7	7	negative regulation of protein processing	GO:0010955	0.12	0.367	A0A3Q2U6J9|1.340342648	1	23	121	21829	http://www.ebi.ac.uk/QuickGO/GTerm?id=GO:0010955
5	5	protein localization to synapse	GO:0035418	0.12	0.367	HSPB1|1.337774448	1	23	121	21829	http://www.ebi.ac.uk/QuickGO/GTerm?id=GO:0035418
7	6,7	negative regulation of protein maturation	GO:1903318	0.12	0.367	A0A3Q2U6J9|1.340342648	1	23	121	21829	http://www.ebi.ac.uk/QuickGO/GTerm?id=GO:1903318
5	5	mitochondrion localization	GO:0051646	0.12	0.367	ALB|1.487005807	1	23	121	21829	http://www.ebi.ac.uk/QuickGO/GTerm?id=GO:0051646
2	2	multicellular organismal process	GO:0032501	0.12	0.367	KBTBD10|1.353350665;TNNT3|1.527716062;A0A3Q2UEL1|1.305534201;A0A3Q3ATJ1|1.201501275;UCH-L1|1.43716929;LMOD3|1.522555731;MYOM1|1.254881107;AMPD3|1.306784743;PDLIM3|1.286425032;GPI|1.354148803;MYOM2|1.223302409;SDHA|1.217654696;ATP5F1|1.373436785;MYPN|1.223593919;HSPB1|1.337774448;SMYD1|1.332742776;ENSGALG00000002907|1.322866394;TPM1|1.390357267;ATP2A1|1.2337889;MYBPC2|1.243510197;HSP70|1.283172572…	35	5228	121	21829	http://www.ebi.ac.uk/QuickGO/GTerm?id=GO:0032501
4	4	organelle organization	GO:0006996	0.122	0.371	KBTBD10|1.353350665;A0A3Q2UCH4|1.308620615;LMOD3|1.522555731;MYOM1|1.254881107;PDLIM3|1.286425032;MYOM2|1.223302409;MYPN|1.223593919;SMYD1|1.332742776;ENSGALG00000002907|1.322866394;TPM1|1.390357267;MYBPC2|1.243510197;CAPZA2|1.308764545;RANBP1|1.340088175;SH3KBP1|1.234699811;HSP70|1.283172572;RAB5C|2.549741805;TIMM13|1.33072494;ENSGALG00000027330|1.235499055;GMFB|0.703153051;A0A3Q2U769|0.58418878…	25	3562	121	21829	http://www.ebi.ac.uk/QuickGO/GTerm?id=GO:0006996
5	5	negative regulation of catalytic activity	GO:0043086	0.122	0.371	A0A3Q2U6J9|1.340342648;UCH-L1|1.43716929;HSPB1|1.337774448;A0A3Q2U769|0.584188784;PPP1R2|0.797609752;FKBP12.6|0.773369444	6	608	121	21829	http://www.ebi.ac.uk/QuickGO/GTerm?id=GO:0043086
9	7,8,9	regulation of protein kinase activity	GO:0045859	0.122	0.371	A0A3Q2UCH4|1.308620615;UCH-L1|1.43716929;HSPB1|1.337774448;HSP70|1.283172572;CAB39|1.21239245;PRKAB2|0.71569607	6	608	121	21829	http://www.ebi.ac.uk/QuickGO/GTerm?id=GO:0045859
8	6,7,8	establishment of protein localization to mitochondrion	GO:0072655	0.124	0.371	TIMM13|1.33072494;SAMM50|0.563408826	2	110	121	21829	http://www.ebi.ac.uk/QuickGO/GTerm?id=GO:0072655
6	5,6	semaphorin-plexin signaling pathway	GO:0071526	0.125	0.371	ARHGDIA|1.261342819	1	24	121	21829	http://www.ebi.ac.uk/QuickGO/GTerm?id=GO:0071526
8	5,6,7,8	regulation of membrane repolarization	GO:0060306	0.125	0.371	A0A3Q3ATJ1|1.201501275	1	24	121	21829	http://www.ebi.ac.uk/QuickGO/GTerm?id=GO:0060306
11	7,8,10,11	regulation of actin nucleation	GO:0051125	0.125	0.371	GMFB|0.703153051	1	24	121	21829	http://www.ebi.ac.uk/QuickGO/GTerm?id=GO:0051125
6	6	glycerolipid catabolic process	GO:0046503	0.125	0.371	PRDX6|1.247143535	1	24	121	21829	http://www.ebi.ac.uk/QuickGO/GTerm?id=GO:0046503
4	4	negative regulation of response to oxidative stress	GO:1902883	0.125	0.371	HSPB1|1.337774448	1	24	121	21829	http://www.ebi.ac.uk/QuickGO/GTerm?id=GO:1902883
6	5,6	positive regulation of immunoglobulin production	GO:0002639	0.125	0.371	GPI|1.354148803	1	24	121	21829	http://www.ebi.ac.uk/QuickGO/GTerm?id=GO:0002639
7	5,6,7	negative regulation of oxidative stress-induced cell death	GO:1903202	0.125	0.371	HSPB1|1.337774448	1	24	121	21829	http://www.ebi.ac.uk/QuickGO/GTerm?id=GO:1903202
6	4,5,6	negative regulation of cellular response to oxidative stress	GO:1900408	0.125	0.371	HSPB1|1.337774448	1	24	121	21829	http://www.ebi.ac.uk/QuickGO/GTerm?id=GO:1900408
7	6,7	embryonic axis specification	GO:0000578	0.125	0.371	A0A3Q2U769|0.584188784	1	24	121	21829	http://www.ebi.ac.uk/QuickGO/GTerm?id=GO:0000578
9	8,9	regulation of peptidyl-threonine phosphorylation	GO:0010799	0.125	0.371	CAB39|1.21239245	1	24	121	21829	http://www.ebi.ac.uk/QuickGO/GTerm?id=GO:0010799
4	4	positive regulation of muscle contraction	GO:0045933	0.125	0.371	ATP2A1|1.2337889	1	24	121	21829	http://www.ebi.ac.uk/QuickGO/GTerm?id=GO:0045933
10	10	calcium ion import	GO:0070509	0.126	0.374	RYR3|1.208753681;FKBP12.6|0.773369444	2	111	121	21829	http://www.ebi.ac.uk/QuickGO/GTerm?id=GO:0070509
4	4	cell communication involved in cardiac conduction	GO:0086065	0.13	0.379	A0A3Q3ATJ1|1.201501275	1	25	121	21829	http://www.ebi.ac.uk/QuickGO/GTerm?id=GO:0086065
6	5,6	regulation of interleukin-1 production	GO:0032652	0.13	0.379	HSPB1|1.337774448	1	25	121	21829	http://www.ebi.ac.uk/QuickGO/GTerm?id=GO:0032652
9	6,7,8,9	regulation of transcription initiation from RNA polymerase II promoter	GO:0060260	0.13	0.379	SUB1|0.814720615	1	25	121	21829	http://www.ebi.ac.uk/QuickGO/GTerm?id=GO:0060260
6	5,6	regulation of neuron projection regeneration	GO:0070570	0.13	0.379	FKBP12.6|0.773369444	1	25	121	21829	http://www.ebi.ac.uk/QuickGO/GTerm?id=GO:0070570
6	5,6	purine-containing compound salvage	GO:0043101	0.13	0.379	AMPD3|1.306784743	1	25	121	21829	http://www.ebi.ac.uk/QuickGO/GTerm?id=GO:0043101
3	3	cytolysis	GO:0019835	0.13	0.379	ALB|1.487005807	1	25	121	21829	http://www.ebi.ac.uk/QuickGO/GTerm?id=GO:0019835
7	6,7	nucleoside triphosphate biosynthetic process	GO:0009142	0.13	0.379	ENO1|1.301513562;ATP5F1|1.373436785	2	113	121	21829	http://www.ebi.ac.uk/QuickGO/GTerm?id=GO:0009142
7	6,7	transport along microtubule	GO:0010970	0.13	0.379	UCH-L1|1.43716929;HSPB1|1.337774448	2	113	121	21829	http://www.ebi.ac.uk/QuickGO/GTerm?id=GO:0010970
7	5,7	chromatin assembly or disassembly	GO:0006333	0.13	0.379	P08286|0.677683947;HP1BP3|0.72359077	2	113	121	21829	http://www.ebi.ac.uk/QuickGO/GTerm?id=GO:0006333
10	9,10	protein ubiquitination involved in ubiquitin-dependent protein catabolic process	GO:0042787	0.132	0.383	CUL2|0.771088233;Rchy1|0.707606765	2	114	121	21829	http://www.ebi.ac.uk/QuickGO/GTerm?id=GO:0042787
8	8	protein depolymerization	GO:0051261	0.132	0.383	LMOD3|1.522555731;CAPZA2|1.308764545	2	114	121	21829	http://www.ebi.ac.uk/QuickGO/GTerm?id=GO:0051261
5	5	small molecule catabolic process	GO:0044282	0.132	0.383	IMPA1|1.338855168;ACAT1|1.26178047;BLMH|1.469427111	3	227	121	21829	http://www.ebi.ac.uk/QuickGO/GTerm?id=GO:0044282
5	4,5	energy derivation by oxidation of organic compounds	GO:0015980	0.133	0.384	SDHA|1.217654696;COX7C|1.254685321;PPP1CB|0.799006051	3	228	121	21829	http://www.ebi.ac.uk/QuickGO/GTerm?id=GO:0015980
5	5	regulation of muscle cell differentiation	GO:0051147	0.134	0.384	LMOD3|1.522555731;SMYD1|1.332742776	2	115	121	21829	http://www.ebi.ac.uk/QuickGO/GTerm?id=GO:0051147
5	5	regulation of organelle organization	GO:0033043	0.134	0.384	A0A3Q2UCH4|1.308620615;LMOD3|1.522555731;MYOM1|1.254881107;MYPN|1.223593919;ENSGALG00000002907|1.322866394;CAPZA2|1.308764545;RANBP1|1.340088175;ENSGALG00000027330|1.235499055;GMFB|0.703153051	9	1059	121	21829	http://www.ebi.ac.uk/QuickGO/GTerm?id=GO:0033043
10	6,7,8,9,10	positive regulation of mRNA processing	GO:0050685	0.135	0.384	PRDX6|1.247143535	1	26	121	21829	http://www.ebi.ac.uk/QuickGO/GTerm?id=GO:0050685
8	7,8	negative regulation of epithelial cell apoptotic process	GO:1904036	0.135	0.384	A0A3Q2U6J9|1.340342648	1	26	121	21829	http://www.ebi.ac.uk/QuickGO/GTerm?id=GO:1904036
6	6	male meiotic nuclear division	GO:0007140	0.135	0.384	HSP70|1.283172572	1	26	121	21829	http://www.ebi.ac.uk/QuickGO/GTerm?id=GO:0007140
8	6,7,8	protein transport along microtubule	GO:0098840	0.135	0.384	HSPB1|1.337774448	1	26	121	21829	http://www.ebi.ac.uk/QuickGO/GTerm?id=GO:0098840
8	7,8	vascular endothelial growth factor signaling pathway	GO:0038084	0.135	0.384	HSPB1|1.337774448	1	26	121	21829	http://www.ebi.ac.uk/QuickGO/GTerm?id=GO:0038084
12	6,7,9,10,11,12	negative regulation of insulin secretion	GO:0046676	0.135	0.384	FKBP12.6|0.773369444	1	26	121	21829	http://www.ebi.ac.uk/QuickGO/GTerm?id=GO:0046676
6	5,6	folic acid-containing compound metabolic process	GO:0006760	0.135	0.384	MTHFD1L|0.749713642	1	26	121	21829	http://www.ebi.ac.uk/QuickGO/GTerm?id=GO:0006760
7	6,7	regulation of mitophagy	GO:1903146	0.136	0.385	A0A3Q2UCH4|1.308620615;MYOM1|1.254881107	2	116	121	21829	http://www.ebi.ac.uk/QuickGO/GTerm?id=GO:1903146
9	7,8,9	positive regulation of ERK1 and ERK2 cascade	GO:0070374	0.136	0.385	A0A3Q3AZP2|1.434367428;GLIPR2|0.785712158	2	116	121	21829	http://www.ebi.ac.uk/QuickGO/GTerm?id=GO:0070374
7	7	protein localization to mitochondrion	GO:0070585	0.136	0.385	TIMM13|1.33072494;SAMM50|0.563408826	2	116	121	21829	http://www.ebi.ac.uk/QuickGO/GTerm?id=GO:0070585
7	6,7	regulation of protein modification process	GO:0031399	0.136	0.385	A0A3Q2UCH4|1.308620615;A0A3Q3AZP2|1.434367428;UCH-L1|1.43716929;HSPB1|1.337774448;HSP70|1.283172572;CAB39|1.21239245;PRKAB2|0.71569607;PPP1R2|0.797609752;Rchy1|0.707606765;FKBP12.6|0.773369444;GLIPR2|0.785712158	11	1365	121	21829	http://www.ebi.ac.uk/QuickGO/GTerm?id=GO:0031399
9	5,6,7,8,9	positive regulation of protein polymerization	GO:0032273	0.137	0.389	LMOD3|1.522555731;GMFB|0.703153051	2	117	121	21829	http://www.ebi.ac.uk/QuickGO/GTerm?id=GO:0032273
5	5	nucleotide salvage	GO:0043173	0.139	0.389	AMPD3|1.306784743	1	27	121	21829	http://www.ebi.ac.uk/QuickGO/GTerm?id=GO:0043173
8	7,8	postreplication repair	GO:0006301	0.139	0.389	UBE2V2|1.250642582	1	27	121	21829	http://www.ebi.ac.uk/QuickGO/GTerm?id=GO:0006301
5	5	peptide catabolic process	GO:0043171	0.139	0.389	XPNPEP1|0.544019076	1	27	121	21829	http://www.ebi.ac.uk/QuickGO/GTerm?id=GO:0043171
7	5,6,7	negative regulation of receptor activity	GO:2000272	0.139	0.389	FKBP12.6|0.773369444	1	27	121	21829	http://www.ebi.ac.uk/QuickGO/GTerm?id=GO:2000272
7	5,6,7	positive regulation of phospholipid metabolic process	GO:1903727	0.139	0.389	A0A3Q3AZP2|1.434367428	1	27	121	21829	http://www.ebi.ac.uk/QuickGO/GTerm?id=GO:1903727
6	6	interleukin-1 beta production	GO:0032611	0.139	0.389	HSPB1|1.337774448	1	27	121	21829	http://www.ebi.ac.uk/QuickGO/GTerm?id=GO:0032611
9	5,6,7,8,9	positive regulation of DNA-templated transcription, initiation	GO:2000144	0.139	0.389	SUB1|0.814720615	1	27	121	21829	http://www.ebi.ac.uk/QuickGO/GTerm?id=GO:2000144
8	7,8	insulin-like growth factor receptor signaling pathway	GO:0048009	0.139	0.389	CILP|1.39877359	1	27	121	21829	http://www.ebi.ac.uk/QuickGO/GTerm?id=GO:0048009
5	5	response to reactive oxygen species	GO:0000302	0.141	0.393	KPNA4|1.24977891;FKBP12.6|0.773369444	2	119	121	21829	http://www.ebi.ac.uk/QuickGO/GTerm?id=GO:0000302
8	7,8	regulation of protein dephosphorylation	GO:0035304	0.143	0.396	PPP1R2|0.797609752;FKBP12.6|0.773369444	2	120	121	21829	http://www.ebi.ac.uk/QuickGO/GTerm?id=GO:0035304
8	5,8	cytoplasmic translational initiation	GO:0002183	0.144	0.396	EIF3I|1.293629736	1	28	121	21829	http://www.ebi.ac.uk/QuickGO/GTerm?id=GO:0002183
8	5,6,8	negative regulation of peptide hormone secretion	GO:0090278	0.144	0.396	FKBP12.6|0.773369444	1	28	121	21829	http://www.ebi.ac.uk/QuickGO/GTerm?id=GO:0090278
4	4	response to cold	GO:0009409	0.144	0.396	HSP70|1.283172572	1	28	121	21829	http://www.ebi.ac.uk/QuickGO/GTerm?id=GO:0009409
7	5,7	negative regulation of calcium ion transport	GO:0051926	0.144	0.396	FKBP12.6|0.773369444	1	28	121	21829	http://www.ebi.ac.uk/QuickGO/GTerm?id=GO:0051926
12	5,6,7,8,10,11,12	positive regulation of cyclin-dependent protein serine/threonine kinase activity	GO:0045737	0.144	0.396	HSP70|1.283172572	1	28	121	21829	http://www.ebi.ac.uk/QuickGO/GTerm?id=GO:0045737
9	6,8,9	axon regeneration	GO:0031103	0.144	0.396	FKBP12.6|0.773369444	1	28	121	21829	http://www.ebi.ac.uk/QuickGO/GTerm?id=GO:0031103
11	6,7,9,10,11	positive regulation of cyclin-dependent protein kinase activity	GO:1904031	0.144	0.396	HSP70|1.283172572	1	28	121	21829	http://www.ebi.ac.uk/QuickGO/GTerm?id=GO:1904031
5	5	regulation of neuronal synaptic plasticity	GO:0048168	0.144	0.396	ENSGALG00000027330|1.235499055	1	28	121	21829	http://www.ebi.ac.uk/QuickGO/GTerm?id=GO:0048168
5	5	sulfur compound biosynthetic process	GO:0044272	0.145	0.397	A0A3Q2UEL1|1.305534201;ACAT1|1.26178047	2	121	121	21829	http://www.ebi.ac.uk/QuickGO/GTerm?id=GO:0044272
6	5,6	cytoskeleton-dependent intracellular transport	GO:0030705	0.145	0.397	UCH-L1|1.43716929;HSPB1|1.337774448	2	121	121	21829	http://www.ebi.ac.uk/QuickGO/GTerm?id=GO:0030705
4	3,4	maintenance of location	GO:0051235	0.149	0.402	RYR3|1.208753681;ALB|1.487005807;FKBP12.6|0.773369444	3	240	121	21829	http://www.ebi.ac.uk/QuickGO/GTerm?id=GO:0051235
3	3	myeloid cell homeostasis	GO:0002262	0.149	0.402	AMPD3|1.306784743;GPI|1.354148803	2	123	121	21829	http://www.ebi.ac.uk/QuickGO/GTerm?id=GO:0002262
11	7,8,9,10,11	regulation of sodium ion transmembrane transporter activity	GO:2000649	0.149	0.402	FXYD6|0.766199089	1	29	121	21829	http://www.ebi.ac.uk/QuickGO/GTerm?id=GO:2000649
9	5,8,9	regulation of heart rate by cardiac conduction	GO:0086091	0.149	0.402	A0A3Q3ATJ1|1.201501275	1	29	121	21829	http://www.ebi.ac.uk/QuickGO/GTerm?id=GO:0086091
6	4,5,6	positive regulation of epithelial to mesenchymal transition	GO:0010718	0.149	0.402	GLIPR2|0.785712158	1	29	121	21829	http://www.ebi.ac.uk/QuickGO/GTerm?id=GO:0010718
11	11	protein K63-linked ubiquitination	GO:0070534	0.149	0.402	UBE2V2|1.250642582	1	29	121	21829	http://www.ebi.ac.uk/QuickGO/GTerm?id=GO:0070534
7	7	brown fat cell differentiation	GO:0050873	0.149	0.402	LAMA4|0.797937472	1	29	121	21829	http://www.ebi.ac.uk/QuickGO/GTerm?id=GO:0050873
9	5,7,8,9	negative regulation of peptide secretion	GO:0002792	0.149	0.402	FKBP12.6|0.773369444	1	29	121	21829	http://www.ebi.ac.uk/QuickGO/GTerm?id=GO:0002792
7	4,5,6,7	regulation of ion homeostasis	GO:2000021	0.151	0.406	RYR3|1.208753681;FKBP12.6|0.773369444	2	124	121	21829	http://www.ebi.ac.uk/QuickGO/GTerm?id=GO:2000021
3	3	positive regulation of cellular component biogenesis	GO:0044089	0.151	0.407	LMOD3|1.522555731;ENSGALG00000027330|1.235499055;GMFB|0.703153051;SUB1|0.814720615	4	371	121	21829	http://www.ebi.ac.uk/QuickGO/GTerm?id=GO:0044089
6	4,6	regulation of epithelial cell migration	GO:0010632	0.153	0.41	HSPB1|1.337774448;GLIPR2|0.785712158	2	125	121	21829	http://www.ebi.ac.uk/QuickGO/GTerm?id=GO:0010632
4	4	homeostatic process	GO:0042592	0.153	0.411	RYR3|1.208753681;TXNRD3|1.204580616;PRDX6|1.247143535;AMPD3|1.306784743;GPI|1.354148803;HSPB1|1.337774448;ERP44|0.745186445;GLRX5|0.502973712;FKBP12.6|0.773369444;ORMDL3|0.402916918	10	1246	121	21829	http://www.ebi.ac.uk/QuickGO/GTerm?id=GO:0042592
7	7	cardiac muscle cell action potential involved in contraction	GO:0086002	0.154	0.411	A0A3Q3ATJ1|1.201501275	1	30	121	21829	http://www.ebi.ac.uk/QuickGO/GTerm?id=GO:0086002
7	6,7	endocytic recycling	GO:0032456	0.154	0.411	LOC100859860|0.744437258	1	30	121	21829	http://www.ebi.ac.uk/QuickGO/GTerm?id=GO:0032456
5	3,5	negative regulation of homeostatic process	GO:0032845	0.155	0.412	RYR3|1.208753681;FKBP12.6|0.773369444	2	126	121	21829	http://www.ebi.ac.uk/QuickGO/GTerm?id=GO:0032845
6	5,6	negative regulation of protein complex assembly	GO:0031333	0.155	0.412	LMOD3|1.522555731;CAPZA2|1.308764545	2	126	121	21829	http://www.ebi.ac.uk/QuickGO/GTerm?id=GO:0031333
3	3	cellular localization	GO:0051641	0.156	0.415	RYR3|1.208753681;UCH-L1|1.43716929;GPI|1.354148803;ARL8B|1.209421094;HSPB1|1.337774448;ALB|1.487005807;RANBP1|1.340088175;KPNA4|1.24977891;RAB5C|2.549741805;TIMM13|1.33072494;BCAP31|0.807755804;VPS29|0.751790268;A0A3Q2U769|0.584188784;SAMM50|0.563408826;LOC100859860|0.744437258;KPNA3|0.806756534;PRKCA|0.487532754;FKBP12.6|0.773369444	18	2519	121	21829	http://www.ebi.ac.uk/QuickGO/GTerm?id=GO:0051641
7	7	regulation of dephosphorylation	GO:0035303	0.157	0.416	PPP1R2|0.797609752;FKBP12.6|0.773369444	2	127	121	21829	http://www.ebi.ac.uk/QuickGO/GTerm?id=GO:0035303
4	4	multicellular organismal movement	GO:0050879	0.158	0.417	ATP2A1|1.2337889	1	31	121	21829	http://www.ebi.ac.uk/QuickGO/GTerm?id=GO:0050879
6	6	positive regulation of DNA binding	GO:0043388	0.158	0.417	EDF1|1.274072423	1	31	121	21829	http://www.ebi.ac.uk/QuickGO/GTerm?id=GO:0043388
11	8,9,10,11	regulation of alternative mRNA splicing, via spliceosome	GO:0000381	0.158	0.417	SRSF2|0.465409726	1	31	121	21829	http://www.ebi.ac.uk/QuickGO/GTerm?id=GO:0000381
5	5	musculoskeletal movement	GO:0050881	0.158	0.417	ATP2A1|1.2337889	1	31	121	21829	http://www.ebi.ac.uk/QuickGO/GTerm?id=GO:0050881
6	6	embryonic epithelial tube formation	GO:0001838	0.159	0.417	A0A3Q2U769|0.584188784;MTHFD1L|0.749713642	2	128	121	21829	http://www.ebi.ac.uk/QuickGO/GTerm?id=GO:0001838
7	7	DNA packaging	GO:0006323	0.159	0.417	P08286|0.677683947;HP1BP3|0.72359077	2	128	121	21829	http://www.ebi.ac.uk/QuickGO/GTerm?id=GO:0006323
7	6,7	regulation of heart contraction	GO:0008016	0.159	0.417	A0A3Q3ATJ1|1.201501275;FKBP12.6|0.773369444	2	128	121	21829	http://www.ebi.ac.uk/QuickGO/GTerm?id=GO:0008016
10	8,9,10	regulation of protein serine/threonine kinase activity	GO:0071900	0.16	0.418	UCH-L1|1.43716929;HSPB1|1.337774448;HSP70|1.283172572;CAB39|1.21239245	4	379	121	21829	http://www.ebi.ac.uk/QuickGO/GTerm?id=GO:0071900
5	5	carbohydrate derivative biosynthetic process	GO:1901137	0.161	0.422	ENO1|1.301513562;A0A3Q2UEL1|1.305534201;ACAT1|1.26178047;AMPD3|1.306784743;ATP5F1|1.373436785;ADSSL1|1.469655536;PANK4|0.649364304	7	807	121	21829	http://www.ebi.ac.uk/QuickGO/GTerm?id=GO:1901137
4	4	establishment of localization in cell	GO:0051649	0.163	0.423	RYR3|1.208753681;UCH-L1|1.43716929;HSPB1|1.337774448;RANBP1|1.340088175;KPNA4|1.24977891;RAB5C|2.549741805;TIMM13|1.33072494;BCAP31|0.807755804;VPS29|0.751790268;A0A3Q2U769|0.584188784;SAMM50|0.563408826;LOC100859860|0.744437258;KPNA3|0.806756534;PRKCA|0.487532754;FKBP12.6|0.773369444	15	2050	121	21829	http://www.ebi.ac.uk/QuickGO/GTerm?id=GO:0051649
6	6	heterophilic cell-cell adhesion via plasma membrane cell adhesion molecules	GO:0007157	0.163	0.423	GYPC|0.786106154	1	32	121	21829	http://www.ebi.ac.uk/QuickGO/GTerm?id=GO:0007157
10	8,9,10	regulation of sodium ion transmembrane transport	GO:1902305	0.163	0.423	FXYD6|0.766199089	1	32	121	21829	http://www.ebi.ac.uk/QuickGO/GTerm?id=GO:1902305
5	5	interleukin-1 production	GO:0032612	0.163	0.423	HSPB1|1.337774448	1	32	121	21829	http://www.ebi.ac.uk/QuickGO/GTerm?id=GO:0032612
7	6,7	intrinsic apoptotic signaling pathway in response to oxidative stress	GO:0008631	0.163	0.423	HSPB1|1.337774448	1	32	121	21829	http://www.ebi.ac.uk/QuickGO/GTerm?id=GO:0008631
4	4	drug metabolic process	GO:0017144	0.163	0.423	ENO1|1.301513562	1	32	121	21829	http://www.ebi.ac.uk/QuickGO/GTerm?id=GO:0017144
7	7	glucose metabolic process	GO:0006006	0.166	0.428	GPI|1.354148803;ENO3|1.243593921	2	132	121	21829	http://www.ebi.ac.uk/QuickGO/GTerm?id=GO:0006006
10	7,8,10	regulation of phosphatidylinositol 3-kinase activity	GO:0043551	0.168	0.428	A0A3Q3AZP2|1.434367428	1	33	121	21829	http://www.ebi.ac.uk/QuickGO/GTerm?id=GO:0043551
5	5	adult walking behavior	GO:0007628	0.168	0.428	UCH-L1|1.43716929	1	33	121	21829	http://www.ebi.ac.uk/QuickGO/GTerm?id=GO:0007628
2	2	cell aggregation	GO:0098743	0.168	0.428	MPZ|0.531735444	1	33	121	21829	http://www.ebi.ac.uk/QuickGO/GTerm?id=GO:0098743
5	5	regulation of immunoglobulin production	GO:0002637	0.168	0.428	GPI|1.354148803	1	33	121	21829	http://www.ebi.ac.uk/QuickGO/GTerm?id=GO:0002637
7	7	ceramide biosynthetic process	GO:0046513	0.168	0.428	ORMDL3|0.402916918	1	33	121	21829	http://www.ebi.ac.uk/QuickGO/GTerm?id=GO:0046513
7	5,6,7	membrane repolarization	GO:0086009	0.168	0.428	A0A3Q3ATJ1|1.201501275	1	33	121	21829	http://www.ebi.ac.uk/QuickGO/GTerm?id=GO:0086009
9	8,9	NAD metabolic process	GO:0019674	0.168	0.428	PBEF1|0.760519451	1	33	121	21829	http://www.ebi.ac.uk/QuickGO/GTerm?id=GO:0019674
10	6,7,8,9,10	positive regulation of calcium ion transmembrane transport	GO:1904427	0.168	0.428	HSP70|1.283172572	1	33	121	21829	http://www.ebi.ac.uk/QuickGO/GTerm?id=GO:1904427
6	5,6	nucleobase biosynthetic process	GO:0046112	0.168	0.428	MTHFD1L|0.749713642	1	33	121	21829	http://www.ebi.ac.uk/QuickGO/GTerm?id=GO:0046112
3	3	regulation of localization	GO:0032879	0.169	0.43	RYR3|1.208753681;A0A3Q2TTX7|1.32240644;CATSPER2|1.202421769;A0A3Q3ATJ1|1.201501275;GPI|1.354148803;MYPN|1.223593919;ARHGDIA|1.261342819;HSPB1|1.337774448;HSP70|1.283172572;RAB5C|2.549741805;LAMA4|0.797937472;FXYD6|0.766199089;FKBP12.6|0.773369444;GLIPR2|0.785712158	14	1903	121	21829	http://www.ebi.ac.uk/QuickGO/GTerm?id=GO:0032879
3	3	circadian rhythm	GO:0007623	0.17	0.432	PPP1CB|0.799006051;PBEF1|0.760519451	2	134	121	21829	http://www.ebi.ac.uk/QuickGO/GTerm?id=GO:0007623
4	4	single-organism carbohydrate metabolic process	GO:0044723	0.171	0.432	IMPA1|1.338855168;GPI|1.354148803;PGK1|1.22553449;ENO3|1.243593921;ALDOC|1.365001997;PPP1CB|0.799006051	6	673	121	21829	http://www.ebi.ac.uk/QuickGO/GTerm?id=GO:0044723
3	3	protein folding	GO:0006457	0.171	0.432	HSPB1|1.337774448;HSP70|1.283172572;ERP44|0.745186445	3	257	121	21829	http://www.ebi.ac.uk/QuickGO/GTerm?id=GO:0006457
7	7	cellular protein complex disassembly	GO:0043624	0.172	0.432	LMOD3|1.522555731;CAPZA2|1.308764545	2	135	121	21829	http://www.ebi.ac.uk/QuickGO/GTerm?id=GO:0043624
8	6,7,8	positive regulation of tumor necrosis factor production	GO:0032760	0.172	0.432	HSPB1|1.337774448	1	34	121	21829	http://www.ebi.ac.uk/QuickGO/GTerm?id=GO:0032760
9	6,8,9	regulation of blood vessel endothelial cell migration	GO:0043535	0.172	0.432	HSPB1|1.337774448	1	34	121	21829	http://www.ebi.ac.uk/QuickGO/GTerm?id=GO:0043535
9	6,9	formation of translation preinitiation complex	GO:0001731	0.172	0.432	EIF3I|1.293629736	1	34	121	21829	http://www.ebi.ac.uk/QuickGO/GTerm?id=GO:0001731
8	5,6,7,8	regulation of DNA-templated transcription, initiation	GO:2000142	0.172	0.432	SUB1|0.814720615	1	34	121	21829	http://www.ebi.ac.uk/QuickGO/GTerm?id=GO:2000142
10	9,10	barbed-end actin filament capping	GO:0051016	0.172	0.432	CAPZA2|1.308764545	1	34	121	21829	http://www.ebi.ac.uk/QuickGO/GTerm?id=GO:0051016
5	5	lysosome localization	GO:0032418	0.172	0.432	ARL8B|1.209421094	1	34	121	21829	http://www.ebi.ac.uk/QuickGO/GTerm?id=GO:0032418
5	4,5	inositol phosphate metabolic process	GO:0043647	0.172	0.432	IMPA1|1.338855168	1	34	121	21829	http://www.ebi.ac.uk/QuickGO/GTerm?id=GO:0043647
8	5,6,7,8	epithelial tube formation	GO:0072175	0.176	0.439	A0A3Q2U769|0.584188784;MTHFD1L|0.749713642	2	137	121	21829	http://www.ebi.ac.uk/QuickGO/GTerm?id=GO:0072175
9	8,9	GTP metabolic process	GO:0046039	0.177	0.439	AMPD3|1.306784743	1	35	121	21829	http://www.ebi.ac.uk/QuickGO/GTerm?id=GO:0046039
8	6,7,8	mitochondrial respiratory chain complex assembly	GO:0033108	0.177	0.439	SAMM50|0.563408826	1	35	121	21829	http://www.ebi.ac.uk/QuickGO/GTerm?id=GO:0033108
6	6	cardiac epithelial to mesenchymal transition	GO:0060317	0.177	0.439	FBLN2|0.537261949	1	35	121	21829	http://www.ebi.ac.uk/QuickGO/GTerm?id=GO:0060317
8	6,7,8	positive regulation of mRNA metabolic process	GO:1903313	0.177	0.439	PRDX6|1.247143535	1	35	121	21829	http://www.ebi.ac.uk/QuickGO/GTerm?id=GO:1903313
6	5,6	positive regulation of tumor necrosis factor superfamily cytokine production	GO:1903557	0.177	0.439	HSPB1|1.337774448	1	35	121	21829	http://www.ebi.ac.uk/QuickGO/GTerm?id=GO:1903557
8	5,6,7,8	negative regulation of ion transmembrane transporter activity	GO:0032413	0.177	0.439	FKBP12.6|0.773369444	1	35	121	21829	http://www.ebi.ac.uk/QuickGO/GTerm?id=GO:0032413
5	5	neuron projection regeneration	GO:0031102	0.177	0.439	FKBP12.6|0.773369444	1	35	121	21829	http://www.ebi.ac.uk/QuickGO/GTerm?id=GO:0031102
7	7	protein localization to nucleus	GO:0034504	0.181	0.446	RANBP1|1.340088175;KPNA4|1.24977891;KPNA3|0.806756534	3	264	121	21829	http://www.ebi.ac.uk/QuickGO/GTerm?id=GO:0034504
4	4	cranial skeletal system development	GO:1904888	0.181	0.446	MTHFD1L|0.749713642	1	36	121	21829	http://www.ebi.ac.uk/QuickGO/GTerm?id=GO:1904888
6	6	alcohol catabolic process	GO:0046164	0.181	0.446	IMPA1|1.338855168	1	36	121	21829	http://www.ebi.ac.uk/QuickGO/GTerm?id=GO:0046164
6	6	cardiac muscle cell action potential	GO:0086001	0.181	0.446	A0A3Q3ATJ1|1.201501275	1	36	121	21829	http://www.ebi.ac.uk/QuickGO/GTerm?id=GO:0086001
5	5	pteridine-containing compound metabolic process	GO:0042558	0.181	0.446	MTHFD1L|0.749713642	1	36	121	21829	http://www.ebi.ac.uk/QuickGO/GTerm?id=GO:0042558
6	5,6	endoplasmic reticulum to cytosol transport	GO:1903513	0.181	0.446	FKBP12.6|0.773369444	1	36	121	21829	http://www.ebi.ac.uk/QuickGO/GTerm?id=GO:1903513
5	5	mitophagy	GO:0000422	0.184	0.451	A0A3Q2UCH4|1.308620615;MYOM1|1.254881107	2	141	121	21829	http://www.ebi.ac.uk/QuickGO/GTerm?id=GO:0000422
7	6,7	mitochondrion disassembly	GO:0061726	0.184	0.451	A0A3Q2UCH4|1.308620615;MYOM1|1.254881107	2	141	121	21829	http://www.ebi.ac.uk/QuickGO/GTerm?id=GO:0061726
7	7	positive regulation of ATPase activity	GO:0032781	0.186	0.452	HSP70|1.283172572	1	37	121	21829	http://www.ebi.ac.uk/QuickGO/GTerm?id=GO:0032781
12	8,9,11,12	Arp2/3 complex-mediated actin nucleation	GO:0034314	0.186	0.452	GMFB|0.703153051	1	37	121	21829	http://www.ebi.ac.uk/QuickGO/GTerm?id=GO:0034314
5	5	response to axon injury	GO:0048678	0.186	0.452	FKBP12.6|0.773369444	1	37	121	21829	http://www.ebi.ac.uk/QuickGO/GTerm?id=GO:0048678
6	4,5,6	regulation of insulin secretion involved in cellular response to glucose stimulus	GO:0061178	0.186	0.452	FKBP12.6|0.773369444	1	37	121	21829	http://www.ebi.ac.uk/QuickGO/GTerm?id=GO:0061178
7	7	cellular response to vascular endothelial growth factor stimulus	GO:0035924	0.186	0.452	HSPB1|1.337774448	1	37	121	21829	http://www.ebi.ac.uk/QuickGO/GTerm?id=GO:0035924
4	4	protein localization	GO:0008104	0.187	0.454	GPI|1.354148803;ARHGDIA|1.261342819;HSPB1|1.337774448;RANBP1|1.340088175;KPNA4|1.24977891;RAB5C|2.549741805;TIMM13|1.33072494;BCAP31|0.807755804;VPS29|0.751790268;A0A3Q2U769|0.584188784;SAMM50|0.563408826;KPNA3|0.806756534;PRKCA|0.487532754;FKBP12.6|0.773369444	14	1941	121	21829	http://www.ebi.ac.uk/QuickGO/GTerm?id=GO:0008104
7	5,6,7	regulation of oxidative stress-induced cell death	GO:1903201	0.191	0.461	HSPB1|1.337774448	1	38	121	21829	http://www.ebi.ac.uk/QuickGO/GTerm?id=GO:1903201
7	4,5,7	negative regulation of hormone secretion	GO:0046888	0.191	0.461	FKBP12.6|0.773369444	1	38	121	21829	http://www.ebi.ac.uk/QuickGO/GTerm?id=GO:0046888
5	5	endosome organization	GO:0007032	0.191	0.461	RAB5C|2.549741805	1	38	121	21829	http://www.ebi.ac.uk/QuickGO/GTerm?id=GO:0007032
4	4	regulation of anatomical structure size	GO:0090066	0.193	0.466	LMOD3|1.522555731;CAPZA2|1.308764545;GMFB|0.703153051;DPYSL2|0.795640031	4	410	121	21829	http://www.ebi.ac.uk/QuickGO/GTerm?id=GO:0090066
12	11,12	positive regulation of cytosolic calcium ion concentration	GO:0007204	0.194	0.466	RYR3|1.208753681;FKBP12.6|0.773369444	2	146	121	21829	http://www.ebi.ac.uk/QuickGO/GTerm?id=GO:0007204
6	6	protein complex disassembly	GO:0043241	0.194	0.466	LMOD3|1.522555731;CAPZA2|1.308764545	2	146	121	21829	http://www.ebi.ac.uk/QuickGO/GTerm?id=GO:0043241
7	7	cardiac muscle cell contraction	GO:0086003	0.195	0.466	A0A3Q3ATJ1|1.201501275	1	39	121	21829	http://www.ebi.ac.uk/QuickGO/GTerm?id=GO:0086003
6	6	membrane depolarization during action potential	GO:0086010	0.195	0.466	A0A3Q3ATJ1|1.201501275	1	39	121	21829	http://www.ebi.ac.uk/QuickGO/GTerm?id=GO:0086010
9	7,8,9	regulation of translational elongation	GO:0006448	0.195	0.466	DPH5|0.719312178	1	39	121	21829	http://www.ebi.ac.uk/QuickGO/GTerm?id=GO:0006448
6	6	purine nucleobase metabolic process	GO:0006144	0.195	0.466	MTHFD1L|0.749713642	1	39	121	21829	http://www.ebi.ac.uk/QuickGO/GTerm?id=GO:0006144
6	5,6	positive regulation of cytokine biosynthetic process	GO:0042108	0.195	0.466	HSPB1|1.337774448	1	39	121	21829	http://www.ebi.ac.uk/QuickGO/GTerm?id=GO:0042108
8	6,7,8	negative regulation of cation transmembrane transport	GO:1904063	0.195	0.466	FKBP12.6|0.773369444	1	39	121	21829	http://www.ebi.ac.uk/QuickGO/GTerm?id=GO:1904063
7	7	glucose homeostasis	GO:0042593	0.198	0.472	GPI|1.354148803;FKBP12.6|0.773369444	2	148	121	21829	http://www.ebi.ac.uk/QuickGO/GTerm?id=GO:0042593
6	6	carbohydrate homeostasis	GO:0033500	0.198	0.472	GPI|1.354148803;FKBP12.6|0.773369444	2	148	121	21829	http://www.ebi.ac.uk/QuickGO/GTerm?id=GO:0033500
7	6,7	cellular response to interferon-gamma	GO:0071346	0.2	0.472	A0A3Q2UCH4|1.308620615	1	40	121	21829	http://www.ebi.ac.uk/QuickGO/GTerm?id=GO:0071346
6	6	dephosphorylation	GO:0016311	0.2	0.472	IMPA1|1.338855168;DUSP3|1.289465091;PPP1CB|0.799006051;PPP1R2|0.797609752;FKBP12.6|0.773369444	5	560	121	21829	http://www.ebi.ac.uk/QuickGO/GTerm?id=GO:0016311
5	5	organelle assembly	GO:0070925	0.2	0.472	KBTBD10|1.353350665;LMOD3|1.522555731;MYOM2|1.223302409;MYPN|1.223593919;MYBPC2|1.243510197	5	560	121	21829	http://www.ebi.ac.uk/QuickGO/GTerm?id=GO:0070925
4	4	tube formation	GO:0035148	0.2	0.472	A0A3Q2U769|0.584188784;MTHFD1L|0.749713642	2	149	121	21829	http://www.ebi.ac.uk/QuickGO/GTerm?id=GO:0035148
5	5	alpha-amino acid metabolic process	GO:1901605	0.2	0.472	ACAT1|1.26178047;BLMH|1.469427111;MTHFD1L|0.749713642	3	278	121	21829	http://www.ebi.ac.uk/QuickGO/GTerm?id=GO:1901605
4	4	sulfur compound metabolic process	GO:0006790	0.2	0.472	A0A3Q2UEL1|1.305534201;ACAT1|1.26178047;BLMH|1.469427111	3	278	121	21829	http://www.ebi.ac.uk/QuickGO/GTerm?id=GO:0006790
4	4	transport	GO:0006810	0.201	0.472	RYR3|1.208753681;ATP2B4|1.454010951;ATP2B2|1.385296881;A0A3Q2TTX7|1.32240644;CATSPER2|1.202421769;A0A3Q3ATJ1|1.201501275;A0A3Q3AZP2|1.434367428;UCH-L1|1.43716929;GPI|1.354148803;ATP5F1|1.373436785;HSPB1|1.337774448;ATP2A1|1.2337889;ALB|1.487005807;RANBP1|1.340088175;KPNA4|1.24977891;HSP70|1.283172572;RAB5C|2.549741805;TIMM13|1.33072494;COX7C|1.254685321;BCAP31|0.807755804;VPS29|0.751790268;A0A3Q2…	30	4647	121	21829	http://www.ebi.ac.uk/QuickGO/GTerm?id=GO:0006810
4	4	cellular catabolic process	GO:0044248	0.201	0.472	ENO1|1.301513562;A0A3Q2UCH4|1.308620615;UCH-L1|1.43716929;ACAT1|1.26178047;PSMD6|1.32702021;MYOM1|1.254881107;PRDX6|1.247143535;BLMH|1.469427111;RANBP1|1.340088175;CUL2|0.771088233;XPNPEP1|0.544019076;Rchy1|0.707606765	12	1645	121	21829	http://www.ebi.ac.uk/QuickGO/GTerm?id=GO:0044248
7	6,7	regulation of phosphate metabolic process	GO:0019220	0.202	0.474	A0A3Q2UCH4|1.308620615;A0A3Q3AZP2|1.434367428;UCH-L1|1.43716929;HSPB1|1.337774448;HSP70|1.283172572;CAB39|1.21239245;PRKAB2|0.71569607;PPP1R2|0.797609752;FKBP12.6|0.773369444;GLIPR2|0.785712158	10	1328	121	21829	http://www.ebi.ac.uk/QuickGO/GTerm?id=GO:0019220
12	9,10,11,12	alternative mRNA splicing, via spliceosome	GO:0000380	0.204	0.475	SRSF2|0.465409726	1	41	121	21829	http://www.ebi.ac.uk/QuickGO/GTerm?id=GO:0000380
6	4,5,6	negative regulation of transporter activity	GO:0032410	0.204	0.475	FKBP12.6|0.773369444	1	41	121	21829	http://www.ebi.ac.uk/QuickGO/GTerm?id=GO:0032410
5	5	sulfur amino acid metabolic process	GO:0000096	0.204	0.475	BLMH|1.469427111	1	41	121	21829	http://www.ebi.ac.uk/QuickGO/GTerm?id=GO:0000096
5	5	organic hydroxy compound catabolic process	GO:1901616	0.204	0.475	IMPA1|1.338855168	1	41	121	21829	http://www.ebi.ac.uk/QuickGO/GTerm?id=GO:1901616
8	7,8	vascular endothelial growth factor receptor signaling pathway	GO:0048010	0.204	0.475	HSPB1|1.337774448	1	41	121	21829	http://www.ebi.ac.uk/QuickGO/GTerm?id=GO:0048010
6	5,6	regulation of phosphorus metabolic process	GO:0051174	0.204	0.475	A0A3Q2UCH4|1.308620615;A0A3Q3AZP2|1.434367428;UCH-L1|1.43716929;HSPB1|1.337774448;HSP70|1.283172572;CAB39|1.21239245;PRKAB2|0.71569607;PPP1R2|0.797609752;FKBP12.6|0.773369444;GLIPR2|0.785712158	10	1332	121	21829	http://www.ebi.ac.uk/QuickGO/GTerm?id=GO:0051174
5	5	carbohydrate biosynthetic process	GO:0016051	0.204	0.475	GPI|1.354148803;ENO3|1.243593921	2	151	121	21829	http://www.ebi.ac.uk/QuickGO/GTerm?id=GO:0016051
8	6,7,8	peptide secretion	GO:0002790	0.206	0.479	GPI|1.354148803;PRKCA|0.487532754;FKBP12.6|0.773369444	3	282	121	21829	http://www.ebi.ac.uk/QuickGO/GTerm?id=GO:0002790
8	5,7,8	embryonic cranial skeleton morphogenesis	GO:0048701	0.208	0.484	MTHFD1L|0.749713642	1	42	121	21829	http://www.ebi.ac.uk/QuickGO/GTerm?id=GO:0048701
5	5	cellular lipid catabolic process	GO:0044242	0.21	0.487	ACAT1|1.26178047;PRDX6|1.247143535	2	154	121	21829	http://www.ebi.ac.uk/QuickGO/GTerm?id=GO:0044242
5	5	organonitrogen compound biosynthetic process	GO:1901566	0.212	0.488	ENO1|1.301513562;A0A3Q2UEL1|1.305534201;ACAT1|1.26178047;EIF3I|1.293629736;AMPD3|1.306784743;ATP5F1|1.373436785;ADSSL1|1.469655536;EEF1B2|1.322594905;RPL27|1.485323169;DPH5|0.719312178;PANK4|0.649364304;MTHFD1L|0.749713642;PBEF1|0.760519451;ORMDL3|0.402916918	14	1990	121	21829	http://www.ebi.ac.uk/QuickGO/GTerm?id=GO:1901566
11	5,7,8,9,10,11	insulin secretion involved in cellular response to glucose stimulus	GO:0035773	0.213	0.488	FKBP12.6|0.773369444	1	43	121	21829	http://www.ebi.ac.uk/QuickGO/GTerm?id=GO:0035773
8	7,8	regulation of epithelial cell apoptotic process	GO:1904035	0.213	0.488	A0A3Q2U6J9|1.340342648	1	43	121	21829	http://www.ebi.ac.uk/QuickGO/GTerm?id=GO:1904035
5	5	negative regulation of lipid biosynthetic process	GO:0051055	0.213	0.488	ORMDL3|0.402916918	1	43	121	21829	http://www.ebi.ac.uk/QuickGO/GTerm?id=GO:0051055
7	6,7	selective autophagy	GO:0061912	0.213	0.488	A0A3Q2UCH4|1.308620615	1	43	121	21829	http://www.ebi.ac.uk/QuickGO/GTerm?id=GO:0061912
7	7	fatty acid beta-oxidation	GO:0006635	0.213	0.488	ACAT1|1.26178047	1	43	121	21829	http://www.ebi.ac.uk/QuickGO/GTerm?id=GO:0006635
8	5,6,7,8	positive regulation of mitotic nuclear division	GO:0045840	0.213	0.488	RANBP1|1.340088175	1	43	121	21829	http://www.ebi.ac.uk/QuickGO/GTerm?id=GO:0045840
6	5,6	cellular respiration	GO:0045333	0.214	0.488	SDHA|1.217654696;COX7C|1.254685321	2	156	121	21829	http://www.ebi.ac.uk/QuickGO/GTerm?id=GO:0045333
5	5	morphogenesis of embryonic epithelium	GO:0016331	0.214	0.488	A0A3Q2U769|0.584188784;MTHFD1L|0.749713642	2	156	121	21829	http://www.ebi.ac.uk/QuickGO/GTerm?id=GO:0016331
7	7	protein dephosphorylation	GO:0006470	0.216	0.488	DUSP3|1.289465091;PPP1CB|0.799006051;PPP1R2|0.797609752;FKBP12.6|0.773369444	4	430	121	21829	http://www.ebi.ac.uk/QuickGO/GTerm?id=GO:0006470
9	7,8,9	peptide hormone secretion	GO:0030072	0.216	0.488	PRKCA|0.487532754;FKBP12.6|0.773369444	2	157	121	21829	http://www.ebi.ac.uk/QuickGO/GTerm?id=GO:0030072
6	5,6	organelle disassembly	GO:1903008	0.216	0.488	A0A3Q2UCH4|1.308620615;MYOM1|1.254881107	2	157	121	21829	http://www.ebi.ac.uk/QuickGO/GTerm?id=GO:1903008
8	7,8	regulation of calcium ion import	GO:0090279	0.217	0.488	FKBP12.6|0.773369444	1	44	121	21829	http://www.ebi.ac.uk/QuickGO/GTerm?id=GO:0090279
5	5	visual learning	GO:0008542	0.217	0.488	ENSGALG00000027330|1.235499055	1	44	121	21829	http://www.ebi.ac.uk/QuickGO/GTerm?id=GO:0008542
6	6	phospholipid catabolic process	GO:0009395	0.217	0.488	PRDX6|1.247143535	1	44	121	21829	http://www.ebi.ac.uk/QuickGO/GTerm?id=GO:0009395
7	6,7	epithelial cell morphogenesis	GO:0003382	0.217	0.488	FLNB|0.613099367	1	44	121	21829	http://www.ebi.ac.uk/QuickGO/GTerm?id=GO:0003382
7	7	positive regulation of macroautophagy	GO:0016239	0.217	0.488	A0A3Q2UCH4|1.308620615	1	44	121	21829	http://www.ebi.ac.uk/QuickGO/GTerm?id=GO:0016239
8	7,8	mitochondrial ATP synthesis coupled electron transport	GO:0042775	0.217	0.488	COX7C|1.254685321	1	44	121	21829	http://www.ebi.ac.uk/QuickGO/GTerm?id=GO:0042775
7	6,7	regulation of calcium-mediated signaling	GO:0050848	0.217	0.488	FKBP12.6|0.773369444	1	44	121	21829	http://www.ebi.ac.uk/QuickGO/GTerm?id=GO:0050848
6	5,6	regulation of cellular response to oxidative stress	GO:1900407	0.217	0.488	HSPB1|1.337774448	1	44	121	21829	http://www.ebi.ac.uk/QuickGO/GTerm?id=GO:1900407
6	6	regulation of skeletal muscle tissue development	GO:0048641	0.217	0.488	LMOD3|1.522555731	1	44	121	21829	http://www.ebi.ac.uk/QuickGO/GTerm?id=GO:0048641
False	obselete	meiosis I	GO:0007127	0.217	0.488	HSP70|1.283172572	1	44	121	21829	http://www.ebi.ac.uk/QuickGO/GTerm?id=GO:0007127
5	5	negative regulation of organelle organization	GO:0010639	0.218	0.489	LMOD3|1.522555731;CAPZA2|1.308764545;GMFB|0.703153051	3	290	121	21829	http://www.ebi.ac.uk/QuickGO/GTerm?id=GO:0010639
6	4,6	response to virus	GO:0009615	0.22	0.493	HSPB1|1.337774448;ALB|1.487005807	2	159	121	21829	http://www.ebi.ac.uk/QuickGO/GTerm?id=GO:0009615
5	5	macromolecular complex disassembly	GO:0032984	0.22	0.493	LMOD3|1.522555731;CAPZA2|1.308764545	2	159	121	21829	http://www.ebi.ac.uk/QuickGO/GTerm?id=GO:0032984
8	7,8	regulation of protein phosphorylation	GO:0001932	0.221	0.493	A0A3Q2UCH4|1.308620615;A0A3Q3AZP2|1.434367428;UCH-L1|1.43716929;HSPB1|1.337774448;HSP70|1.283172572;CAB39|1.21239245;PRKAB2|0.71569607;GLIPR2|0.785712158	8	1042	121	21829	http://www.ebi.ac.uk/QuickGO/GTerm?id=GO:0001932
8	5,7,8	cardiac conduction	GO:0061337	0.221	0.493	A0A3Q3ATJ1|1.201501275	1	45	121	21829	http://www.ebi.ac.uk/QuickGO/GTerm?id=GO:0061337
6	4,5,6	positive regulation of actin filament bundle assembly	GO:0032233	0.221	0.493	ENSGALG00000027330|1.235499055	1	45	121	21829	http://www.ebi.ac.uk/QuickGO/GTerm?id=GO:0032233
7	6,7	heart looping	GO:0001947	0.221	0.493	A0A3Q2U769|0.584188784	1	45	121	21829	http://www.ebi.ac.uk/QuickGO/GTerm?id=GO:0001947
9	6,7,9	regulation of lipid kinase activity	GO:0043550	0.221	0.493	A0A3Q3AZP2|1.434367428	1	45	121	21829	http://www.ebi.ac.uk/QuickGO/GTerm?id=GO:0043550
4	4	visual behavior	GO:0007632	0.226	0.496	ENSGALG00000027330|1.235499055	1	46	121	21829	http://www.ebi.ac.uk/QuickGO/GTerm?id=GO:0007632
7	6,7	anterior/posterior axis specification	GO:0009948	0.226	0.496	A0A3Q2U769|0.584188784	1	46	121	21829	http://www.ebi.ac.uk/QuickGO/GTerm?id=GO:0009948
7	6,7	regulation of myoblast differentiation	GO:0045661	0.226	0.496	SMYD1|1.332742776	1	46	121	21829	http://www.ebi.ac.uk/QuickGO/GTerm?id=GO:0045661
4	4	positive regulation of production of molecular mediator of immune response	GO:0002702	0.226	0.496	GPI|1.354148803	1	46	121	21829	http://www.ebi.ac.uk/QuickGO/GTerm?id=GO:0002702
7	6,7	platelet aggregation	GO:0070527	0.226	0.496	HSPB1|1.337774448	1	46	121	21829	http://www.ebi.ac.uk/QuickGO/GTerm?id=GO:0070527
10	5,9,10	regulation of release of sequestered calcium ion into cytosol	GO:0051279	0.226	0.496	FKBP12.6|0.773369444	1	46	121	21829	http://www.ebi.ac.uk/QuickGO/GTerm?id=GO:0051279
7	5,6,7	negative regulation of ion transmembrane transport	GO:0034766	0.226	0.496	FKBP12.6|0.773369444	1	46	121	21829	http://www.ebi.ac.uk/QuickGO/GTerm?id=GO:0034766
5	5	determination of heart left/right asymmetry	GO:0061371	0.226	0.496	A0A3Q2U769|0.584188784	1	46	121	21829	http://www.ebi.ac.uk/QuickGO/GTerm?id=GO:0061371
6	5,6	regulation of cellular protein metabolic process	GO:0032268	0.226	0.496	A0A3Q2U6J9|1.340342648;A0A3Q2UCH4|1.308620615;A0A3Q3AZP2|1.434367428;UCH-L1|1.43716929;EIF3I|1.293629736;HSPB1|1.337774448;HSP70|1.283172572;CAB39|1.21239245;DPH5|0.719312178;PRKAB2|0.71569607;PPP1R2|0.797609752;Rchy1|0.707606765;FKBP12.6|0.773369444;GLIPR2|0.785712158	14	2016	121	21829	http://www.ebi.ac.uk/QuickGO/GTerm?id=GO:0032268
3	3	anatomical structure morphogenesis	GO:0009653	0.226	0.496	KBTBD10|1.353350665;UCH-L1|1.43716929;LMOD3|1.522555731;GPI|1.354148803;MYOM2|1.223302409;MYPN|1.223593919;HSPB1|1.337774448;MYBPC2|1.243510197;SH3KBP1|1.234699811;A0A3Q2U769|0.584188784;FLNB|0.613099367;MTHFD1L|0.749713642;FBLN2|0.537261949;DPYSL2|0.795640031;GLIPR2|0.785712158	15	2181	121	21829	http://www.ebi.ac.uk/QuickGO/GTerm?id=GO:0009653
8	7,8	RNA splicing	GO:0008380	0.228	0.499	PRDX6|1.247143535;RTCB|1.284666414;SRSF2|0.465409726	3	297	121	21829	http://www.ebi.ac.uk/QuickGO/GTerm?id=GO:0008380
7	6,7	mesenchymal cell differentiation	GO:0048762	0.229	0.5	FBLN2|0.537261949;GLIPR2|0.785712158	2	163	121	21829	http://www.ebi.ac.uk/QuickGO/GTerm?id=GO:0048762
6	6	protein-DNA complex assembly	GO:0065004	0.229	0.5	P08286|0.677683947;HP1BP3|0.72359077	2	163	121	21829	http://www.ebi.ac.uk/QuickGO/GTerm?id=GO:0065004
2	2	localization	GO:0051179	0.23	0.5	RYR3|1.208753681;ATP2B4|1.454010951;ATP2B2|1.385296881;A0A3Q2TTX7|1.32240644;CATSPER2|1.202421769;A0A3Q3ATJ1|1.201501275;A0A3Q3AZP2|1.434367428;UCH-L1|1.43716929;GPI|1.354148803;ATP5F1|1.373436785;ARL8B|1.209421094;MYPN|1.223593919;ARHGDIA|1.261342819;HSPB1|1.337774448;ATP2A1|1.2337889;ALB|1.487005807;RANBP1|1.340088175;KPNA4|1.24977891;SH3KBP1|1.234699811;HSP70|1.283172572;RAB5C|2.549741805;TIMM…	36	5765	121	21829	http://www.ebi.ac.uk/QuickGO/GTerm?id=GO:0051179
6	4,6	positive regulation of muscle organ development	GO:0048636	0.23	0.5	LMOD3|1.522555731	1	47	121	21829	http://www.ebi.ac.uk/QuickGO/GTerm?id=GO:0048636
8	6,7,8	cardiac muscle cell development	GO:0055013	0.23	0.5	MYPN|1.223593919	1	47	121	21829	http://www.ebi.ac.uk/QuickGO/GTerm?id=GO:0055013
6	6	cellular modified amino acid biosynthetic process	GO:0042398	0.23	0.5	MTHFD1L|0.749713642	1	47	121	21829	http://www.ebi.ac.uk/QuickGO/GTerm?id=GO:0042398
6	5,6	positive regulation of striated muscle tissue development	GO:0045844	0.23	0.5	LMOD3|1.522555731	1	47	121	21829	http://www.ebi.ac.uk/QuickGO/GTerm?id=GO:0045844
11	10,11	regulation of cytosolic calcium ion concentration	GO:0051480	0.231	0.5	RYR3|1.208753681;FKBP12.6|0.773369444	2	164	121	21829	http://www.ebi.ac.uk/QuickGO/GTerm?id=GO:0051480
4	4	neural tube development	GO:0021915	0.231	0.5	A0A3Q2U769|0.584188784;MTHFD1L|0.749713642	2	164	121	21829	http://www.ebi.ac.uk/QuickGO/GTerm?id=GO:0021915
9	8,9	ubiquitin-dependent protein catabolic process	GO:0006511	0.231	0.5	UCH-L1|1.43716929;PSMD6|1.32702021;RANBP1|1.340088175;CUL2|0.771088233;Rchy1|0.707606765	5	591	121	21829	http://www.ebi.ac.uk/QuickGO/GTerm?id=GO:0006511
6	5,6	regulation of blood circulation	GO:1903522	0.233	0.502	A0A3Q3ATJ1|1.201501275;FKBP12.6|0.773369444	2	165	121	21829	http://www.ebi.ac.uk/QuickGO/GTerm?id=GO:1903522
5	5	blood coagulation	GO:0007596	0.233	0.502	HSPB1|1.337774448;FGB|0.807555904	2	165	121	21829	http://www.ebi.ac.uk/QuickGO/GTerm?id=GO:0007596
6	6	regulation of phospholipid metabolic process	GO:1903725	0.234	0.504	A0A3Q3AZP2|1.434367428	1	48	121	21829	http://www.ebi.ac.uk/QuickGO/GTerm?id=GO:1903725
6	5,6	cell death in response to oxidative stress	GO:0036473	0.234	0.504	HSPB1|1.337774448	1	48	121	21829	http://www.ebi.ac.uk/QuickGO/GTerm?id=GO:0036473
6	5,6	response to interferon-gamma	GO:0034341	0.234	0.504	A0A3Q2UCH4|1.308620615	1	48	121	21829	http://www.ebi.ac.uk/QuickGO/GTerm?id=GO:0034341
5	5	hemostasis	GO:0007599	0.235	0.504	HSPB1|1.337774448;FGB|0.807555904	2	166	121	21829	http://www.ebi.ac.uk/QuickGO/GTerm?id=GO:0007599
8	7,8	modification-dependent protein catabolic process	GO:0019941	0.238	0.507	UCH-L1|1.43716929;PSMD6|1.32702021;RANBP1|1.340088175;CUL2|0.771088233;Rchy1|0.707606765	5	598	121	21829	http://www.ebi.ac.uk/QuickGO/GTerm?id=GO:0019941
9	8,9	energy coupled proton transport, down electrochemical gradient	GO:0015985	0.239	0.507	ATP5F1|1.373436785	1	49	121	21829	http://www.ebi.ac.uk/QuickGO/GTerm?id=GO:0015985
8	8	guanosine-containing compound metabolic process	GO:1901068	0.239	0.507	AMPD3|1.306784743	1	49	121	21829	http://www.ebi.ac.uk/QuickGO/GTerm?id=GO:1901068
7	6,7	ATP synthesis coupled electron transport	GO:0042773	0.239	0.507	COX7C|1.254685321	1	49	121	21829	http://www.ebi.ac.uk/QuickGO/GTerm?id=GO:0042773
9	5,6,7,8,9	positive regulation of ion transmembrane transporter activity	GO:0032414	0.239	0.507	HSP70|1.283172572	1	49	121	21829	http://www.ebi.ac.uk/QuickGO/GTerm?id=GO:0032414
4	4	chaperone-mediated protein folding	GO:0061077	0.239	0.507	HSPB1|1.337774448	1	49	121	21829	http://www.ebi.ac.uk/QuickGO/GTerm?id=GO:0061077
10	9,10	ATP synthesis coupled proton transport	GO:0015986	0.239	0.507	ATP5F1|1.373436785	1	49	121	21829	http://www.ebi.ac.uk/QuickGO/GTerm?id=GO:0015986
6	6	carboxylic acid catabolic process	GO:0046395	0.239	0.507	ACAT1|1.26178047;BLMH|1.469427111	2	168	121	21829	http://www.ebi.ac.uk/QuickGO/GTerm?id=GO:0046395
5	5	organic acid catabolic process	GO:0016054	0.239	0.507	ACAT1|1.26178047;BLMH|1.469427111	2	168	121	21829	http://www.ebi.ac.uk/QuickGO/GTerm?id=GO:0016054
7	7	regulation of macroautophagy	GO:0016241	0.241	0.51	A0A3Q2UCH4|1.308620615;MYOM1|1.254881107	2	169	121	21829	http://www.ebi.ac.uk/QuickGO/GTerm?id=GO:0016241
8	7,8	regulation of ERK1 and ERK2 cascade	GO:0070372	0.241	0.51	A0A3Q3AZP2|1.434367428;GLIPR2|0.785712158	2	169	121	21829	http://www.ebi.ac.uk/QuickGO/GTerm?id=GO:0070372
6	6	negative regulation of hydrolase activity	GO:0051346	0.242	0.511	A0A3Q2U6J9|1.340342648;A0A3Q2U769|0.584188784;FKBP12.6|0.773369444	3	307	121	21829	http://www.ebi.ac.uk/QuickGO/GTerm?id=GO:0051346
6	6	hexose metabolic process	GO:0019318	0.243	0.511	GPI|1.354148803;ENO3|1.243593921	2	170	121	21829	http://www.ebi.ac.uk/QuickGO/GTerm?id=GO:0019318
6	6	regulation of ATPase activity	GO:0043462	0.243	0.511	HSP70|1.283172572	1	50	121	21829	http://www.ebi.ac.uk/QuickGO/GTerm?id=GO:0043462
9	7,9	regulation of sodium ion transport	GO:0002028	0.243	0.511	FXYD6|0.766199089	1	50	121	21829	http://www.ebi.ac.uk/QuickGO/GTerm?id=GO:0002028
2	2	cell killing	GO:0001906	0.243	0.511	ALB|1.487005807	1	50	121	21829	http://www.ebi.ac.uk/QuickGO/GTerm?id=GO:0001906
7	6,7	retina homeostasis	GO:0001895	0.243	0.511	HSPB1|1.337774448	1	50	121	21829	http://www.ebi.ac.uk/QuickGO/GTerm?id=GO:0001895
6	6	modification-dependent macromolecule catabolic process	GO:0043632	0.246	0.512	UCH-L1|1.43716929;PSMD6|1.32702021;RANBP1|1.340088175;CUL2|0.771088233;Rchy1|0.707606765	5	606	121	21829	http://www.ebi.ac.uk/QuickGO/GTerm?id=GO:0043632
3	3	establishment of localization	GO:0051234	0.247	0.512	RYR3|1.208753681;ATP2B4|1.454010951;ATP2B2|1.385296881;A0A3Q2TTX7|1.32240644;CATSPER2|1.202421769;A0A3Q3ATJ1|1.201501275;A0A3Q3AZP2|1.434367428;UCH-L1|1.43716929;GPI|1.354148803;ATP5F1|1.373436785;HSPB1|1.337774448;ATP2A1|1.2337889;ALB|1.487005807;RANBP1|1.340088175;KPNA4|1.24977891;HSP70|1.283172572;RAB5C|2.549741805;TIMM13|1.33072494;COX7C|1.254685321;BCAP31|0.807755804;VPS29|0.751790268;A0A3Q2…	30	4771	121	21829	http://www.ebi.ac.uk/QuickGO/GTerm?id=GO:0051234
4	4	positive regulation of response to external stimulus	GO:0032103	0.247	0.512	HSPB1|1.337774448;FKBP12.6|0.773369444	2	172	121	21829	http://www.ebi.ac.uk/QuickGO/GTerm?id=GO:0032103
4	4	coagulation	GO:0050817	0.247	0.512	HSPB1|1.337774448;FGB|0.807555904	2	172	121	21829	http://www.ebi.ac.uk/QuickGO/GTerm?id=GO:0050817
6	5,6	embryonic heart tube morphogenesis	GO:0003143	0.247	0.512	A0A3Q2U769|0.584188784	1	51	121	21829	http://www.ebi.ac.uk/QuickGO/GTerm?id=GO:0003143
8	5,7,8	positive regulation of endothelial cell migration	GO:0010595	0.247	0.512	HSPB1|1.337774448	1	51	121	21829	http://www.ebi.ac.uk/QuickGO/GTerm?id=GO:0010595
5	5	modification of morphology or physiology of other organism involved in symbiotic interaction	GO:0051817	0.247	0.512	ALB|1.487005807	1	51	121	21829	http://www.ebi.ac.uk/QuickGO/GTerm?id=GO:0051817
8	8	blood vessel endothelial cell migration	GO:0043534	0.247	0.512	HSPB1|1.337774448	1	51	121	21829	http://www.ebi.ac.uk/QuickGO/GTerm?id=GO:0043534
5	5	regulation of centrosome cycle	GO:0046605	0.247	0.512	RANBP1|1.340088175	1	51	121	21829	http://www.ebi.ac.uk/QuickGO/GTerm?id=GO:0046605
6	5,6	positive regulation of stem cell differentiation	GO:2000738	0.247	0.512	GLIPR2|0.785712158	1	51	121	21829	http://www.ebi.ac.uk/QuickGO/GTerm?id=GO:2000738
5	4,5	positive regulation of muscle tissue development	GO:1901863	0.247	0.512	LMOD3|1.522555731	1	51	121	21829	http://www.ebi.ac.uk/QuickGO/GTerm?id=GO:1901863
6	5,6	protein localization to membrane	GO:0072657	0.248	0.514	TIMM13|1.33072494;A0A3Q2U769|0.584188784;SAMM50|0.563408826	3	311	121	21829	http://www.ebi.ac.uk/QuickGO/GTerm?id=GO:0072657
8	7,8	Rab protein signal transduction	GO:0032482	0.251	0.518	RAB5C|2.549741805	1	52	121	21829	http://www.ebi.ac.uk/QuickGO/GTerm?id=GO:0032482
6	5,6	cardiac cell development	GO:0055006	0.251	0.518	MYPN|1.223593919	1	52	121	21829	http://www.ebi.ac.uk/QuickGO/GTerm?id=GO:0055006
4	4	negative regulation of transmembrane transport	GO:0034763	0.251	0.518	FKBP12.6|0.773369444	1	52	121	21829	http://www.ebi.ac.uk/QuickGO/GTerm?id=GO:0034763
8	5,6,7,8	positive regulation of nuclear division	GO:0051785	0.251	0.518	RANBP1|1.340088175	1	52	121	21829	http://www.ebi.ac.uk/QuickGO/GTerm?id=GO:0051785
6	6	epithelial cell migration	GO:0010631	0.253	0.52	HSPB1|1.337774448;GLIPR2|0.785712158	2	175	121	21829	http://www.ebi.ac.uk/QuickGO/GTerm?id=GO:0010631
5	5	blood circulation	GO:0008015	0.254	0.52	A0A3Q3ATJ1|1.201501275;TPM1|1.390357267;FKBP12.6|0.773369444	3	315	121	21829	http://www.ebi.ac.uk/QuickGO/GTerm?id=GO:0008015
5	4,5	cellular modified amino acid metabolic process	GO:0006575	0.255	0.52	BLMH|1.469427111;MTHFD1L|0.749713642	2	176	121	21829	http://www.ebi.ac.uk/QuickGO/GTerm?id=GO:0006575
8	7,8	phosphatidylinositol phosphorylation	GO:0046854	0.255	0.52	IMPA1|1.338855168	1	53	121	21829	http://www.ebi.ac.uk/QuickGO/GTerm?id=GO:0046854
7	5,7	regulation of axon extension	GO:0030516	0.255	0.52	DPYSL2|0.795640031	1	53	121	21829	http://www.ebi.ac.uk/QuickGO/GTerm?id=GO:0030516
10	4,5,6,7,8,10	regulation of calcium ion transport into cytosol	GO:0010522	0.255	0.52	FKBP12.6|0.773369444	1	53	121	21829	http://www.ebi.ac.uk/QuickGO/GTerm?id=GO:0010522
7	7	regulation of protein processing	GO:0070613	0.255	0.52	A0A3Q2U6J9|1.340342648	1	53	121	21829	http://www.ebi.ac.uk/QuickGO/GTerm?id=GO:0070613
5	5	regulation of epithelial to mesenchymal transition	GO:0010717	0.255	0.52	GLIPR2|0.785712158	1	53	121	21829	http://www.ebi.ac.uk/QuickGO/GTerm?id=GO:0010717
6	6	regulation of protein maturation	GO:1903317	0.255	0.52	A0A3Q2U6J9|1.340342648	1	53	121	21829	http://www.ebi.ac.uk/QuickGO/GTerm?id=GO:1903317
6	6	protein localization to organelle	GO:0033365	0.256	0.52	RANBP1|1.340088175;KPNA4|1.24977891;TIMM13|1.33072494;SAMM50|0.563408826;KPNA3|0.806756534	5	615	121	21829	http://www.ebi.ac.uk/QuickGO/GTerm?id=GO:0033365
6	6	nucleotide catabolic process	GO:0009166	0.26	0.526	ENO1|1.301513562	1	54	121	21829	http://www.ebi.ac.uk/QuickGO/GTerm?id=GO:0009166
8	7,8	regulation of cardiac muscle contraction	GO:0055117	0.26	0.526	FKBP12.6|0.773369444	1	54	121	21829	http://www.ebi.ac.uk/QuickGO/GTerm?id=GO:0055117
6	6	actin-mediated cell contraction	GO:0070252	0.26	0.526	A0A3Q3ATJ1|1.201501275	1	54	121	21829	http://www.ebi.ac.uk/QuickGO/GTerm?id=GO:0070252
4	4	one-carbon metabolic process	GO:0006730	0.26	0.526	MTHFD1L|0.749713642	1	54	121	21829	http://www.ebi.ac.uk/QuickGO/GTerm?id=GO:0006730
9	5,6,7,8,9	protein secretion	GO:0009306	0.26	0.526	GPI|1.354148803;PRKCA|0.487532754;FKBP12.6|0.773369444	3	319	121	21829	http://www.ebi.ac.uk/QuickGO/GTerm?id=GO:0009306
6	5,6	regulation of cellular amide metabolic process	GO:0034248	0.26	0.526	EIF3I|1.293629736;DPH5|0.719312178;ORMDL3|0.402916918	3	319	121	21829	http://www.ebi.ac.uk/QuickGO/GTerm?id=GO:0034248
5	5	epithelium migration	GO:0090132	0.261	0.527	HSPB1|1.337774448;GLIPR2|0.785712158	2	179	121	21829	http://www.ebi.ac.uk/QuickGO/GTerm?id=GO:0090132
7	6,7	ERK1 and ERK2 cascade	GO:0070371	0.261	0.527	A0A3Q3AZP2|1.434367428;GLIPR2|0.785712158	2	179	121	21829	http://www.ebi.ac.uk/QuickGO/GTerm?id=GO:0070371
3	3	nitrogen compound metabolic process	GO:0006807	0.262	0.527	PBXIP1|1.284159514;DUSP3|1.289465091;ENO1|1.301513562;A0A3Q2U6J9|1.340342648;A0A3Q2UCH4|1.308620615;PTGES3|1.249959146;A0A3Q2UDT6|1.205693283;A0A3Q2UEL1|1.305534201;CAMK2D|1.395725167;A0A3Q3AZP2|1.434367428;UCH-L1|1.43716929;ACAT1|1.26178047;EIF3I|1.293629736;PSMD6|1.32702021;PRDX6|1.247143535;MOSPD1|1.300070747;AMPD3|1.306784743;GPI|1.354148803;ATP5F1|1.373436785;NPEPL1|1.259782993;PGK1|1.225534…	61	10285	121	21829	http://www.ebi.ac.uk/QuickGO/GTerm?id=GO:0006807
4	4	single-organism biosynthetic process	GO:0044711	0.263	0.529	ACAT1|1.26178047;AMPD3|1.306784743;GPI|1.354148803;ATP5F1|1.373436785;ADSSL1|1.469655536;ENO3|1.243593921;PANK4|0.649364304;MTHFD1L|0.749713642;PBEF1|0.760519451;ORMDL3|0.402916918	10	1421	121	21829	http://www.ebi.ac.uk/QuickGO/GTerm?id=GO:0044711
5	5	organic substance transport	GO:0071702	0.264	0.529	A0A3Q3AZP2|1.434367428;GPI|1.354148803;HSPB1|1.337774448;RANBP1|1.340088175;KPNA4|1.24977891;RAB5C|2.549741805;TIMM13|1.33072494;BCAP31|0.807755804;VPS29|0.751790268;A0A3Q2U769|0.584188784;SAMM50|0.563408826;KPNA3|0.806756534;PRKCA|0.487532754;FKBP12.6|0.773369444	14	2083	121	21829	http://www.ebi.ac.uk/QuickGO/GTerm?id=GO:0071702
7	7	negative regulation of phosphatase activity	GO:0010923	0.264	0.529	FKBP12.6|0.773369444	1	55	121	21829	http://www.ebi.ac.uk/QuickGO/GTerm?id=GO:0010923
6	6	protein modification by small protein removal	GO:0070646	0.265	0.532	UCH-L1|1.43716929;COPS7B|0.663774909	2	181	121	21829	http://www.ebi.ac.uk/QuickGO/GTerm?id=GO:0070646
3	3	macromolecule localization	GO:0033036	0.266	0.532	A0A3Q3AZP2|1.434367428;GPI|1.354148803;ARHGDIA|1.261342819;HSPB1|1.337774448;RANBP1|1.340088175;KPNA4|1.24977891;RAB5C|2.549741805;TIMM13|1.33072494;BCAP31|0.807755804;VPS29|0.751790268;A0A3Q2U769|0.584188784;SAMM50|0.563408826;KPNA3|0.806756534;PRKCA|0.487532754;FKBP12.6|0.773369444	15	2254	121	21829	http://www.ebi.ac.uk/QuickGO/GTerm?id=GO:0033036
4	4	tissue migration	GO:0090130	0.268	0.533	HSPB1|1.337774448;GLIPR2|0.785712158	2	182	121	21829	http://www.ebi.ac.uk/QuickGO/GTerm?id=GO:0090130
4	4	negative regulation of molecular function	GO:0044092	0.268	0.533	A0A3Q2U6J9|1.340342648;UCH-L1|1.43716929;HSPB1|1.337774448;A0A3Q2U769|0.584188784;PPP1R2|0.797609752;FKBP12.6|0.773369444	6	783	121	21829	http://www.ebi.ac.uk/QuickGO/GTerm?id=GO:0044092
5	5	regulation of response to oxidative stress	GO:1902882	0.268	0.533	HSPB1|1.337774448	1	56	121	21829	http://www.ebi.ac.uk/QuickGO/GTerm?id=GO:1902882
7	6,7	positive regulation of protein kinase B signaling	GO:0051897	0.268	0.533	A0A3Q3AZP2|1.434367428	1	56	121	21829	http://www.ebi.ac.uk/QuickGO/GTerm?id=GO:0051897
6	6	amide biosynthetic process	GO:0043604	0.27	0.538	A0A3Q2UEL1|1.305534201;EIF3I|1.293629736;EEF1B2|1.322594905;RPL27|1.485323169;DPH5|0.719312178;MTHFD1L|0.749713642;ORMDL3|0.402916918	7	945	121	21829	http://www.ebi.ac.uk/QuickGO/GTerm?id=GO:0043604
6	5,6	nuclear transport	GO:0051169	0.271	0.538	RANBP1|1.340088175;KPNA4|1.24977891;KPNA3|0.806756534	3	326	121	21829	http://www.ebi.ac.uk/QuickGO/GTerm?id=GO:0051169
5	5	protein-DNA complex subunit organization	GO:0071824	0.272	0.538	P08286|0.677683947;HP1BP3|0.72359077	2	184	121	21829	http://www.ebi.ac.uk/QuickGO/GTerm?id=GO:0071824
4	4	cellular metabolic compound salvage	GO:0043094	0.272	0.538	AMPD3|1.306784743	1	57	121	21829	http://www.ebi.ac.uk/QuickGO/GTerm?id=GO:0043094
4	4	negative regulation of lipid metabolic process	GO:0045833	0.272	0.538	ORMDL3|0.402916918	1	57	121	21829	http://www.ebi.ac.uk/QuickGO/GTerm?id=GO:0045833
5	5	small molecule biosynthetic process	GO:0044283	0.273	0.539	ENO1|1.301513562;GPI|1.354148803;ENO3|1.243593921;MTHFD1L|0.749713642	4	477	121	21829	http://www.ebi.ac.uk/QuickGO/GTerm?id=GO:0044283
5	5	response to nutrient levels	GO:0031667	0.275	0.542	MYOM1|1.254881107;ALB|1.487005807;FKBP12.6|0.773369444	3	329	121	21829	http://www.ebi.ac.uk/QuickGO/GTerm?id=GO:0031667
5	5	lipid modification	GO:0030258	0.276	0.542	IMPA1|1.338855168;ACAT1|1.26178047	2	186	121	21829	http://www.ebi.ac.uk/QuickGO/GTerm?id=GO:0030258
9	7,8,9	cellular response to glucose stimulus	GO:0071333	0.276	0.542	FKBP12.6|0.773369444	1	58	121	21829	http://www.ebi.ac.uk/QuickGO/GTerm?id=GO:0071333
6	4,5,6	positive regulation of transporter activity	GO:0032411	0.276	0.542	HSP70|1.283172572	1	58	121	21829	http://www.ebi.ac.uk/QuickGO/GTerm?id=GO:0032411
9	6,7,8,9	positive regulation of cation transmembrane transport	GO:1904064	0.276	0.542	HSP70|1.283172572	1	58	121	21829	http://www.ebi.ac.uk/QuickGO/GTerm?id=GO:1904064
3	3	cellular component organization	GO:0016043	0.276	0.542	KBTBD10|1.353350665;PSMD11|1.440547778;A0A3Q2UCH4|1.308620615;UCH-L1|1.43716929;LMOD3|1.522555731;EIF3I|1.293629736;MYOM1|1.254881107;PDLIM3|1.286425032;MYOM2|1.223302409;MYPN|1.223593919;SMYD1|1.332742776;ENSGALG00000002907|1.322866394;TPM1|1.390357267;MYBPC2|1.243510197;CAPZA2|1.308764545;RANBP1|1.340088175;SH3KBP1|1.234699811;HSP70|1.283172572;RAB5C|2.549741805;TIMM13|1.33072494;ENSGALG0000002…	34	5542	121	21829	http://www.ebi.ac.uk/QuickGO/GTerm?id=GO:0016043
2	2	cellular component organization or biogenesis	GO:0071840	0.277	0.542	KBTBD10|1.353350665;PSMD11|1.440547778;A0A3Q2UCH4|1.308620615;UCH-L1|1.43716929;LMOD3|1.522555731;EIF3I|1.293629736;MYOM1|1.254881107;PDLIM3|1.286425032;MYOM2|1.223302409;MYPN|1.223593919;SMYD1|1.332742776;ENSGALG00000002907|1.322866394;TPM1|1.390357267;MYBPC2|1.243510197;CAPZA2|1.308764545;RANBP1|1.340088175;SH3KBP1|1.234699811;HSP70|1.283172572;RAB5C|2.549741805;TIMM13|1.33072494;ENSGALG0000002…	35	5717	121	21829	http://www.ebi.ac.uk/QuickGO/GTerm?id=GO:0071840
6	6	cellular response to peptide	GO:1901653	0.278	0.543	A0A3Q2TTX7|1.32240644;A0A3Q3ATJ1|1.201501275	2	187	121	21829	http://www.ebi.ac.uk/QuickGO/GTerm?id=GO:1901653
8	8	cellular response to hexose stimulus	GO:0071331	0.28	0.543	FKBP12.6|0.773369444	1	59	121	21829	http://www.ebi.ac.uk/QuickGO/GTerm?id=GO:0071331
7	7	cellular response to monosaccharide stimulus	GO:0071326	0.28	0.543	FKBP12.6|0.773369444	1	59	121	21829	http://www.ebi.ac.uk/QuickGO/GTerm?id=GO:0071326
7	5,7	oxidative phosphorylation	GO:0006119	0.28	0.543	COX7C|1.254685321	1	59	121	21829	http://www.ebi.ac.uk/QuickGO/GTerm?id=GO:0006119
12	7,8,9,10,11,12	negative regulation of MAP kinase activity	GO:0043407	0.28	0.543	UCH-L1|1.43716929	1	59	121	21829	http://www.ebi.ac.uk/QuickGO/GTerm?id=GO:0043407
6	5,6	regulation of stress fiber assembly	GO:0051492	0.28	0.543	ENSGALG00000027330|1.235499055	1	59	121	21829	http://www.ebi.ac.uk/QuickGO/GTerm?id=GO:0051492
4	3,4	regulation of circadian rhythm	GO:0042752	0.28	0.543	PPP1CB|0.799006051	1	59	121	21829	http://www.ebi.ac.uk/QuickGO/GTerm?id=GO:0042752
5	5	nucleobase metabolic process	GO:0009112	0.28	0.543	MTHFD1L|0.749713642	1	59	121	21829	http://www.ebi.ac.uk/QuickGO/GTerm?id=GO:0009112
6	5,6	embryonic pattern specification	GO:0009880	0.28	0.543	A0A3Q2U769|0.584188784	1	59	121	21829	http://www.ebi.ac.uk/QuickGO/GTerm?id=GO:0009880
6	5,6	mitochondrial transport	GO:0006839	0.282	0.546	TIMM13|1.33072494;SAMM50|0.563408826	2	189	121	21829	http://www.ebi.ac.uk/QuickGO/GTerm?id=GO:0006839
5	5	mitochondrion organization	GO:0007005	0.282	0.546	A0A3Q2UCH4|1.308620615;MYOM1|1.254881107;TIMM13|1.33072494;SAMM50|0.563408826	4	485	121	21829	http://www.ebi.ac.uk/QuickGO/GTerm?id=GO:0007005
9	7,8,9	regulation of cation channel activity	GO:2001257	0.284	0.546	FKBP12.6|0.773369444	1	60	121	21829	http://www.ebi.ac.uk/QuickGO/GTerm?id=GO:2001257
9	9	negative regulation of cysteine-type endopeptidase activity	GO:2000117	0.284	0.546	A0A3Q2U6J9|1.340342648	1	60	121	21829	http://www.ebi.ac.uk/QuickGO/GTerm?id=GO:2000117
8	7,8	negative regulation of protein dephosphorylation	GO:0035308	0.284	0.546	FKBP12.6|0.773369444	1	60	121	21829	http://www.ebi.ac.uk/QuickGO/GTerm?id=GO:0035308
6	6	sphingolipid biosynthetic process	GO:0030148	0.284	0.546	ORMDL3|0.402916918	1	60	121	21829	http://www.ebi.ac.uk/QuickGO/GTerm?id=GO:0030148
7	6,7	RNA export from nucleus	GO:0006405	0.284	0.546	RANBP1|1.340088175	1	60	121	21829	http://www.ebi.ac.uk/QuickGO/GTerm?id=GO:0006405
6	5,6	regulation of cytokine-mediated signaling pathway	GO:0001959	0.284	0.546	A0A3Q2UCH4|1.308620615	1	60	121	21829	http://www.ebi.ac.uk/QuickGO/GTerm?id=GO:0001959
7	7	regulation of phosphorylation	GO:0042325	0.286	0.549	A0A3Q2UCH4|1.308620615;A0A3Q3AZP2|1.434367428;UCH-L1|1.43716929;HSPB1|1.337774448;HSP70|1.283172572;CAB39|1.21239245;PRKAB2|0.71569607;GLIPR2|0.785712158	8	1125	121	21829	http://www.ebi.ac.uk/QuickGO/GTerm?id=GO:0042325
5	5	mesoderm formation	GO:0001707	0.288	0.549	GPI|1.354148803	1	61	121	21829	http://www.ebi.ac.uk/QuickGO/GTerm?id=GO:0001707
7	5,7	cellular response to hypoxia	GO:0071456	0.288	0.549	A0A3Q2UDT6|1.205693283	1	61	121	21829	http://www.ebi.ac.uk/QuickGO/GTerm?id=GO:0071456
6	6	associative learning	GO:0008306	0.288	0.549	ENSGALG00000027330|1.235499055	1	61	121	21829	http://www.ebi.ac.uk/QuickGO/GTerm?id=GO:0008306
7	6,7	phospholipid transport	GO:0015914	0.288	0.549	A0A3Q3AZP2|1.434367428	1	61	121	21829	http://www.ebi.ac.uk/QuickGO/GTerm?id=GO:0015914
7	6,7	lipid phosphorylation	GO:0046834	0.288	0.549	IMPA1|1.338855168	1	61	121	21829	http://www.ebi.ac.uk/QuickGO/GTerm?id=GO:0046834
7	6,7	fatty acid oxidation	GO:0019395	0.288	0.549	ACAT1|1.26178047	1	61	121	21829	http://www.ebi.ac.uk/QuickGO/GTerm?id=GO:0019395
8	8	negative regulation of protein kinase activity	GO:0006469	0.288	0.549	UCH-L1|1.43716929;HSPB1|1.337774448	2	192	121	21829	http://www.ebi.ac.uk/QuickGO/GTerm?id=GO:0006469
4	4	negative regulation of cellular component organization	GO:0051129	0.29	0.551	LMOD3|1.522555731;CAPZA2|1.308764545;HSP70|1.283172572;GMFB|0.703153051	4	491	121	21829	http://www.ebi.ac.uk/QuickGO/GTerm?id=GO:0051129
5	5	cellular amide metabolic process	GO:0043603	0.291	0.551	A0A3Q2UEL1|1.305534201;EIF3I|1.293629736;EEF1B2|1.322594905;RPL27|1.485323169;DPH5|0.719312178;MTHFD1L|0.749713642;XPNPEP1|0.544019076;ORMDL3|0.402916918	8	1132	121	21829	http://www.ebi.ac.uk/QuickGO/GTerm?id=GO:0043603
4	4	embryonic organ development	GO:0048568	0.292	0.551	A0A3Q2U769|0.584188784;MTHFD1L|0.749713642;FKBP12.6|0.773369444	3	340	121	21829	http://www.ebi.ac.uk/QuickGO/GTerm?id=GO:0048568
6	6	embryo development ending in birth or egg hatching	GO:0009792	0.292	0.551	A0A3Q2U769|0.584188784;MTHFD1L|0.749713642;FKBP12.6|0.773369444	3	340	121	21829	http://www.ebi.ac.uk/QuickGO/GTerm?id=GO:0009792
6	6	fatty acid catabolic process	GO:0009062	0.292	0.551	ACAT1|1.26178047	1	62	121	21829	http://www.ebi.ac.uk/QuickGO/GTerm?id=GO:0009062
6	6	cellular response to decreased oxygen levels	GO:0036294	0.292	0.551	A0A3Q2UDT6|1.205693283	1	62	121	21829	http://www.ebi.ac.uk/QuickGO/GTerm?id=GO:0036294
5	5	regulation of cell migration	GO:0030334	0.295	0.551	MYPN|1.223593919;HSPB1|1.337774448;LAMA4|0.797937472;GLIPR2|0.785712158	4	495	121	21829	http://www.ebi.ac.uk/QuickGO/GTerm?id=GO:0030334
5	5	phospholipid metabolic process	GO:0006644	0.295	0.551	IMPA1|1.338855168;A0A3Q3AZP2|1.434367428;PRDX6|1.247143535	3	342	121	21829	http://www.ebi.ac.uk/QuickGO/GTerm?id=GO:0006644
6	5,6	lipid oxidation	GO:0034440	0.296	0.551	ACAT1|1.26178047	1	63	121	21829	http://www.ebi.ac.uk/QuickGO/GTerm?id=GO:0034440
5	5	glycogen metabolic process	GO:0005977	0.296	0.551	PPP1CB|0.799006051	1	63	121	21829	http://www.ebi.ac.uk/QuickGO/GTerm?id=GO:0005977
4	4	regulation of response to cytokine stimulus	GO:0060759	0.296	0.551	A0A3Q2UCH4|1.308620615	1	63	121	21829	http://www.ebi.ac.uk/QuickGO/GTerm?id=GO:0060759
5	5	nucleoside phosphate catabolic process	GO:1901292	0.296	0.551	ENO1|1.301513562	1	63	121	21829	http://www.ebi.ac.uk/QuickGO/GTerm?id=GO:1901292
5	5	membrane depolarization	GO:0051899	0.296	0.551	A0A3Q3ATJ1|1.201501275	1	63	121	21829	http://www.ebi.ac.uk/QuickGO/GTerm?id=GO:0051899
6	6	glucan metabolic process	GO:0044042	0.296	0.551	PPP1CB|0.799006051	1	63	121	21829	http://www.ebi.ac.uk/QuickGO/GTerm?id=GO:0044042
6	6	cellular response to carbohydrate stimulus	GO:0071322	0.296	0.551	FKBP12.6|0.773369444	1	63	121	21829	http://www.ebi.ac.uk/QuickGO/GTerm?id=GO:0071322
5	5	response to ketone	GO:1901654	0.296	0.551	HSP70|1.283172572	1	63	121	21829	http://www.ebi.ac.uk/QuickGO/GTerm?id=GO:1901654
7	6,7	cellular glucan metabolic process	GO:0006073	0.296	0.551	PPP1CB|0.799006051	1	63	121	21829	http://www.ebi.ac.uk/QuickGO/GTerm?id=GO:0006073
7	6,7	regulation of tumor necrosis factor production	GO:0032680	0.296	0.551	HSPB1|1.337774448	1	63	121	21829	http://www.ebi.ac.uk/QuickGO/GTerm?id=GO:0032680
4	4	modification of morphology or physiology of other organism	GO:0035821	0.296	0.551	ALB|1.487005807	1	63	121	21829	http://www.ebi.ac.uk/QuickGO/GTerm?id=GO:0035821
5	5	monosaccharide metabolic process	GO:0005996	0.296	0.551	GPI|1.354148803;ENO3|1.243593921	2	196	121	21829	http://www.ebi.ac.uk/QuickGO/GTerm?id=GO:0005996
4	4	response to extracellular stimulus	GO:0009991	0.296	0.551	MYOM1|1.254881107;ALB|1.487005807;FKBP12.6|0.773369444	3	343	121	21829	http://www.ebi.ac.uk/QuickGO/GTerm?id=GO:0009991
6	5,6	positive regulation of cell development	GO:0010720	0.298	0.554	LMOD3|1.522555731;FKBP12.6|0.773369444;GLIPR2|0.785712158	3	344	121	21829	http://www.ebi.ac.uk/QuickGO/GTerm?id=GO:0010720
4	4	transmission of nerve impulse	GO:0019226	0.3	0.555	FKBP12.6|0.773369444	1	64	121	21829	http://www.ebi.ac.uk/QuickGO/GTerm?id=GO:0019226
7	6,7	negative regulation of intrinsic apoptotic signaling pathway	GO:2001243	0.3	0.555	HSPB1|1.337774448	1	64	121	21829	http://www.ebi.ac.uk/QuickGO/GTerm?id=GO:2001243
5	5	proteolysis	GO:0006508	0.3	0.555	A0A3Q2U6J9|1.340342648;A0A3Q2UDT6|1.205693283;UCH-L1|1.43716929;PSMD6|1.32702021;NPEPL1|1.259782993;BLMH|1.469427111;RANBP1|1.340088175;CAPN1|0.796189874;COPS7B|0.663774909;CUL2|0.771088233;XPNPEP1|0.544019076;Rchy1|0.707606765	12	1807	121	21829	http://www.ebi.ac.uk/QuickGO/GTerm?id=GO:0006508
7	7	negative regulation of dephosphorylation	GO:0035305	0.304	0.558	FKBP12.6|0.773369444	1	65	121	21829	http://www.ebi.ac.uk/QuickGO/GTerm?id=GO:0035305
5	5	response to unfolded protein	GO:0006986	0.304	0.558	ERP44|0.745186445	1	65	121	21829	http://www.ebi.ac.uk/QuickGO/GTerm?id=GO:0006986
6	5,6	regulation of tumor necrosis factor superfamily cytokine production	GO:1903555	0.304	0.558	HSPB1|1.337774448	1	65	121	21829	http://www.ebi.ac.uk/QuickGO/GTerm?id=GO:1903555
6	6	tumor necrosis factor production	GO:0032640	0.304	0.558	HSPB1|1.337774448	1	65	121	21829	http://www.ebi.ac.uk/QuickGO/GTerm?id=GO:0032640
11	8,9,10,11	positive regulation of proteasomal ubiquitin-dependent protein catabolic process	GO:0032436	0.304	0.558	Rchy1|0.707606765	1	65	121	21829	http://www.ebi.ac.uk/QuickGO/GTerm?id=GO:0032436
3	3	positive regulation of behavior	GO:0048520	0.304	0.558	HSPB1|1.337774448	1	65	121	21829	http://www.ebi.ac.uk/QuickGO/GTerm?id=GO:0048520
7	7	epithelial cell apoptotic process	GO:1904019	0.304	0.558	A0A3Q2U6J9|1.340342648	1	65	121	21829	http://www.ebi.ac.uk/QuickGO/GTerm?id=GO:1904019
4	4	brain development	GO:0007420	0.305	0.56	ATP5F1|1.373436785;MBP|0.690656099;FKBP12.6|0.773369444;DPYSL2|0.795640031	4	503	121	21829	http://www.ebi.ac.uk/QuickGO/GTerm?id=GO:0007420
4	4	tricarboxylic acid cycle	GO:0006099	0.307	0.56	SDHA|1.217654696	1	66	121	21829	http://www.ebi.ac.uk/QuickGO/GTerm?id=GO:0006099
5	5	pigment biosynthetic process	GO:0046148	0.307	0.56	MTHFD1L|0.749713642	1	66	121	21829	http://www.ebi.ac.uk/QuickGO/GTerm?id=GO:0046148
6	5,6	regulation of cytokine biosynthetic process	GO:0042035	0.307	0.56	HSPB1|1.337774448	1	66	121	21829	http://www.ebi.ac.uk/QuickGO/GTerm?id=GO:0042035
6	5,6	regulation of extent of cell growth	GO:0061387	0.307	0.56	DPYSL2|0.795640031	1	66	121	21829	http://www.ebi.ac.uk/QuickGO/GTerm?id=GO:0061387
3	3	feeding behavior	GO:0007631	0.307	0.56	UCH-L1|1.43716929	1	66	121	21829	http://www.ebi.ac.uk/QuickGO/GTerm?id=GO:0007631
6	5,6	mesoderm morphogenesis	GO:0048332	0.307	0.56	GPI|1.354148803	1	66	121	21829	http://www.ebi.ac.uk/QuickGO/GTerm?id=GO:0048332
7	6,7	keratinocyte differentiation	GO:0030216	0.307	0.56	FLNB|0.613099367	1	66	121	21829	http://www.ebi.ac.uk/QuickGO/GTerm?id=GO:0030216
3	3	response to abiotic stimulus	GO:0009628	0.309	0.56	A0A3Q2UDT6|1.205693283;CKM|1.28135235;HSP70|1.283172572;ENSGALG00000027330|1.235499055;PPP1CB|0.799006051	5	665	121	21829	http://www.ebi.ac.uk/QuickGO/GTerm?id=GO:0009628
7	7	negative regulation of kinase activity	GO:0033673	0.311	0.56	UCH-L1|1.43716929;HSPB1|1.337774448	2	203	121	21829	http://www.ebi.ac.uk/QuickGO/GTerm?id=GO:0033673
2	2	rhythmic process	GO:0048511	0.311	0.56	PPP1CB|0.799006051;PBEF1|0.760519451	2	203	121	21829	http://www.ebi.ac.uk/QuickGO/GTerm?id=GO:0048511
6	5,6	endosomal transport	GO:0016197	0.311	0.56	VPS29|0.751790268;LOC100859860|0.744437258	2	203	121	21829	http://www.ebi.ac.uk/QuickGO/GTerm?id=GO:0016197
4	4	response to wounding	GO:0009611	0.311	0.56	HSPB1|1.337774448;SRSF5|0.613528475;FGB|0.807555904;FKBP12.6|0.773369444	4	508	121	21829	http://www.ebi.ac.uk/QuickGO/GTerm?id=GO:0009611
6	4,6	negative regulation of ion transport	GO:0043271	0.311	0.56	FKBP12.6|0.773369444	1	67	121	21829	http://www.ebi.ac.uk/QuickGO/GTerm?id=GO:0043271
8	4,7,8	somitogenesis	GO:0001756	0.311	0.56	A0A3Q2U769|0.584188784	1	67	121	21829	http://www.ebi.ac.uk/QuickGO/GTerm?id=GO:0001756
4	4	regulation of production of molecular mediator of immune response	GO:0002700	0.311	0.56	GPI|1.354148803	1	67	121	21829	http://www.ebi.ac.uk/QuickGO/GTerm?id=GO:0002700
7	5,7	positive regulation of calcium ion transport	GO:0051928	0.311	0.56	HSP70|1.283172572	1	67	121	21829	http://www.ebi.ac.uk/QuickGO/GTerm?id=GO:0051928
5	5	response to retinoic acid	GO:0032526	0.311	0.56	FKBP12.6|0.773369444	1	67	121	21829	http://www.ebi.ac.uk/QuickGO/GTerm?id=GO:0032526
5	5	tumor necrosis factor superfamily cytokine production	GO:0071706	0.311	0.56	HSPB1|1.337774448	1	67	121	21829	http://www.ebi.ac.uk/QuickGO/GTerm?id=GO:0071706
7	6,7	posttranscriptional regulation of gene expression	GO:0010608	0.311	0.56	A0A3Q2UCH4|1.308620615;EIF3I|1.293629736;DPH5|0.719312178	3	353	121	21829	http://www.ebi.ac.uk/QuickGO/GTerm?id=GO:0010608
6	5,6	establishment of protein localization to membrane	GO:0090150	0.313	0.562	TIMM13|1.33072494;SAMM50|0.563408826	2	204	121	21829	http://www.ebi.ac.uk/QuickGO/GTerm?id=GO:0090150
5	5	regulation of protein metabolic process	GO:0051246	0.314	0.563	A0A3Q2U6J9|1.340342648;A0A3Q2UCH4|1.308620615;A0A3Q3AZP2|1.434367428;UCH-L1|1.43716929;EIF3I|1.293629736;HSPB1|1.337774448;HSP70|1.283172572;CAB39|1.21239245;DPH5|0.719312178;PRKAB2|0.71569607;PPP1R2|0.797609752;Rchy1|0.707606765;FKBP12.6|0.773369444;GLIPR2|0.785712158	14	2167	121	21829	http://www.ebi.ac.uk/QuickGO/GTerm?id=GO:0051246
6	6	hormone secretion	GO:0046879	0.315	0.563	PRKCA|0.487532754;FKBP12.6|0.773369444	2	205	121	21829	http://www.ebi.ac.uk/QuickGO/GTerm?id=GO:0046879
6	5,6	mesenchyme development	GO:0060485	0.315	0.563	FBLN2|0.537261949;GLIPR2|0.785712158	2	205	121	21829	http://www.ebi.ac.uk/QuickGO/GTerm?id=GO:0060485
5	5	cellular response to oxygen levels	GO:0071453	0.315	0.563	A0A3Q2UDT6|1.205693283	1	68	121	21829	http://www.ebi.ac.uk/QuickGO/GTerm?id=GO:0071453
4	4	interaction with host	GO:0051701	0.315	0.563	ALB|1.487005807	1	68	121	21829	http://www.ebi.ac.uk/QuickGO/GTerm?id=GO:0051701
7	7	cytoplasmic translation	GO:0002181	0.315	0.563	EIF3I|1.293629736	1	68	121	21829	http://www.ebi.ac.uk/QuickGO/GTerm?id=GO:0002181
4	4	regulation of cell motility	GO:2000145	0.317	0.565	MYPN|1.223593919;HSPB1|1.337774448;LAMA4|0.797937472;GLIPR2|0.785712158	4	513	121	21829	http://www.ebi.ac.uk/QuickGO/GTerm?id=GO:2000145
5	5	regulation of lipid metabolic process	GO:0019216	0.319	0.565	A0A3Q3AZP2|1.434367428;ORMDL3|0.402916918	2	207	121	21829	http://www.ebi.ac.uk/QuickGO/GTerm?id=GO:0019216
6	5,6	energy reserve metabolic process	GO:0006112	0.319	0.565	PPP1CB|0.799006051	1	69	121	21829	http://www.ebi.ac.uk/QuickGO/GTerm?id=GO:0006112
7	7	stress fiber assembly	GO:0043149	0.319	0.565	ENSGALG00000027330|1.235499055	1	69	121	21829	http://www.ebi.ac.uk/QuickGO/GTerm?id=GO:0043149
5	4,5	regulation of actin filament bundle assembly	GO:0032231	0.319	0.565	ENSGALG00000027330|1.235499055	1	69	121	21829	http://www.ebi.ac.uk/QuickGO/GTerm?id=GO:0032231
8	8	citrate metabolic process	GO:0006101	0.319	0.565	SDHA|1.217654696	1	69	121	21829	http://www.ebi.ac.uk/QuickGO/GTerm?id=GO:0006101
9	5,7,8,9	regulation of translational initiation	GO:0006446	0.319	0.565	EIF3I|1.293629736	1	69	121	21829	http://www.ebi.ac.uk/QuickGO/GTerm?id=GO:0006446
6	6	positive regulation of autophagy	GO:0010508	0.319	0.565	A0A3Q2UCH4|1.308620615	1	69	121	21829	http://www.ebi.ac.uk/QuickGO/GTerm?id=GO:0010508
6	6	DNA conformation change	GO:0071103	0.321	0.567	P08286|0.677683947;HP1BP3|0.72359077	2	208	121	21829	http://www.ebi.ac.uk/QuickGO/GTerm?id=GO:0071103
5	5	homeostasis of number of cells	GO:0048872	0.321	0.567	AMPD3|1.306784743;GPI|1.354148803	2	208	121	21829	http://www.ebi.ac.uk/QuickGO/GTerm?id=GO:0048872
5	5	regulation of DNA binding	GO:0051101	0.323	0.567	EDF1|1.274072423	1	70	121	21829	http://www.ebi.ac.uk/QuickGO/GTerm?id=GO:0051101
4	4	immunoglobulin production	GO:0002377	0.323	0.567	GPI|1.354148803	1	70	121	21829	http://www.ebi.ac.uk/QuickGO/GTerm?id=GO:0002377
11	6,7,9,10,11	regulation of cyclin-dependent protein serine/threonine kinase activity	GO:0000079	0.323	0.567	HSP70|1.283172572	1	70	121	21829	http://www.ebi.ac.uk/QuickGO/GTerm?id=GO:0000079
8	8	transcription initiation from RNA polymerase II promoter	GO:0006367	0.323	0.567	SUB1|0.814720615	1	70	121	21829	http://www.ebi.ac.uk/QuickGO/GTerm?id=GO:0006367
6	6	ceramide metabolic process	GO:0006672	0.323	0.567	ORMDL3|0.402916918	1	70	121	21829	http://www.ebi.ac.uk/QuickGO/GTerm?id=GO:0006672
5	5	heart morphogenesis	GO:0003007	0.323	0.567	A0A3Q2U769|0.584188784;FBLN2|0.537261949	2	209	121	21829	http://www.ebi.ac.uk/QuickGO/GTerm?id=GO:0003007
3	3	anatomical structure development	GO:0048856	0.323	0.567	KBTBD10|1.353350665;UCH-L1|1.43716929;LMOD3|1.522555731;PDLIM3|1.286425032;GPI|1.354148803;MYOM2|1.223302409;SDHA|1.217654696;ATP5F1|1.373436785;MYPN|1.223593919;HSPB1|1.337774448;SMYD1|1.332742776;MYBPC2|1.243510197;TAGLN|1.249989286;SH3KBP1|1.234699811;HSP70|1.283172572;ALDOC|1.365001997;A0A3Q2U769|0.584188784;FLNB|0.613099367;MTHFD1L|0.749713642;LAMA4|0.797937472;FBLN2|0.537261949;MBP|0.690656…	26	4255	121	21829	http://www.ebi.ac.uk/QuickGO/GTerm?id=GO:0048856
2	2	cellular process	GO:0009987	0.324	0.567	KBTBD10|1.353350665;PBXIP1|1.284159514;RYR3|1.208753681;ATP2B4|1.454010951;IMPA1|1.338855168;DUSP3|1.289465091;ATP2B2|1.385296881;TXNRD3|1.204580616;ENO1|1.301513562;A0A3Q2TTX7|1.32240644;A0A3Q2U6J9|1.340342648;PSMD11|1.440547778;A0A3Q2UCH4|1.308620615;PTGES3|1.249959146;A0A3Q2UDT6|1.205693283;A0A3Q2UEL1|1.305534201;CAMK2D|1.395725167;A0A3Q3ATJ1|1.201501275;A0A3Q3AZP2|1.434367428;UCH-L1|1.4371692…	105	18511	121	21829	http://www.ebi.ac.uk/QuickGO/GTerm?id=GO:0009987
3	3	cell adhesion	GO:0007155	0.324	0.568	HSPB1|1.337774448;MYBPC2|1.243510197;GYPC|0.786106154;NID2|0.740439165;LAMA4|0.797937472;FBLN2|0.537261949;MPZ|0.531735444;PPP1CB|0.799006051	8	1172	121	21829	http://www.ebi.ac.uk/QuickGO/GTerm?id=GO:0007155
7	6,7	proteolysis involved in cellular protein catabolic process	GO:0051603	0.325	0.568	UCH-L1|1.43716929;PSMD6|1.32702021;RANBP1|1.340088175;CUL2|0.771088233;Rchy1|0.707606765	5	680	121	21829	http://www.ebi.ac.uk/QuickGO/GTerm?id=GO:0051603
7	6,7	retrograde transport, endosome to Golgi	GO:0042147	0.327	0.568	VPS29|0.751790268	1	71	121	21829	http://www.ebi.ac.uk/QuickGO/GTerm?id=GO:0042147
5	4,5	positive regulation of chemotaxis	GO:0050921	0.327	0.568	HSPB1|1.337774448	1	71	121	21829	http://www.ebi.ac.uk/QuickGO/GTerm?id=GO:0050921
10	8,9,10	positive regulation of peptidyl-serine phosphorylation	GO:0033138	0.327	0.568	CAB39|1.21239245	1	71	121	21829	http://www.ebi.ac.uk/QuickGO/GTerm?id=GO:0033138
10	9,10	RNA splicing, via transesterification reactions with bulged adenosine as nucleophile	GO:0000377	0.327	0.568	PRDX6|1.247143535;SRSF2|0.465409726	2	211	121	21829	http://www.ebi.ac.uk/QuickGO/GTerm?id=GO:0000377
11	8,9,10,11	mRNA splicing, via spliceosome	GO:0000398	0.327	0.568	PRDX6|1.247143535;SRSF2|0.465409726	2	211	121	21829	http://www.ebi.ac.uk/QuickGO/GTerm?id=GO:0000398
2	2	biological adhesion	GO:0022610	0.327	0.568	HSPB1|1.337774448;MYBPC2|1.243510197;GYPC|0.786106154;NID2|0.740439165;LAMA4|0.797937472;FBLN2|0.537261949;MPZ|0.531735444;PPP1CB|0.799006051	8	1175	121	21829	http://www.ebi.ac.uk/QuickGO/GTerm?id=GO:0022610
6	5,6	hormone transport	GO:0009914	0.329	0.57	PRKCA|0.487532754;FKBP12.6|0.773369444	2	212	121	21829	http://www.ebi.ac.uk/QuickGO/GTerm?id=GO:0009914
7	6,7	proton transport	GO:0015992	0.329	0.57	ATP5F1|1.373436785;COX7C|1.254685321	2	212	121	21829	http://www.ebi.ac.uk/QuickGO/GTerm?id=GO:0015992
5	5	actin filament-based movement	GO:0030048	0.33	0.571	A0A3Q3ATJ1|1.201501275	1	72	121	21829	http://www.ebi.ac.uk/QuickGO/GTerm?id=GO:0030048
6	6	myoblast differentiation	GO:0045445	0.33	0.571	SMYD1|1.332742776	1	72	121	21829	http://www.ebi.ac.uk/QuickGO/GTerm?id=GO:0045445
6	5,6	hydrogen transport	GO:0006818	0.331	0.571	ATP5F1|1.373436785;COX7C|1.254685321	2	213	121	21829	http://www.ebi.ac.uk/QuickGO/GTerm?id=GO:0006818
9	8,9	RNA splicing, via transesterification reactions	GO:0000375	0.331	0.571	PRDX6|1.247143535;SRSF2|0.465409726	2	213	121	21829	http://www.ebi.ac.uk/QuickGO/GTerm?id=GO:0000375
10	5,6,7,8,9,10	negative regulation of protein secretion	GO:0050709	0.334	0.576	FKBP12.6|0.773369444	1	73	121	21829	http://www.ebi.ac.uk/QuickGO/GTerm?id=GO:0050709
6	6	regulation of mitochondrion organization	GO:0010821	0.335	0.576	A0A3Q2UCH4|1.308620615;MYOM1|1.254881107	2	215	121	21829	http://www.ebi.ac.uk/QuickGO/GTerm?id=GO:0010821
5	5	epithelium development	GO:0060429	0.335	0.576	TAGLN|1.249989286;ALDOC|1.365001997;A0A3Q2U769|0.584188784;FLNB|0.613099367;MTHFD1L|0.749713642;FKBP12.6|0.773369444	6	853	121	21829	http://www.ebi.ac.uk/QuickGO/GTerm?id=GO:0060429
4	4	response to inorganic substance	GO:0010035	0.337	0.576	KPNA4|1.24977891;FKBP12.6|0.773369444	2	216	121	21829	http://www.ebi.ac.uk/QuickGO/GTerm?id=GO:0010035
5	5	response to light stimulus	GO:0009416	0.337	0.576	ENSGALG00000027330|1.235499055;PPP1CB|0.799006051	2	216	121	21829	http://www.ebi.ac.uk/QuickGO/GTerm?id=GO:0009416
6	6	polyol metabolic process	GO:0019751	0.338	0.576	IMPA1|1.338855168	1	74	121	21829	http://www.ebi.ac.uk/QuickGO/GTerm?id=GO:0019751
4	4	pigment metabolic process	GO:0042440	0.338	0.576	MTHFD1L|0.749713642	1	74	121	21829	http://www.ebi.ac.uk/QuickGO/GTerm?id=GO:0042440
6	6	axon extension	GO:0048675	0.338	0.576	DPYSL2|0.795640031	1	74	121	21829	http://www.ebi.ac.uk/QuickGO/GTerm?id=GO:0048675
4	4	response to topologically incorrect protein	GO:0035966	0.338	0.576	ERP44|0.745186445	1	74	121	21829	http://www.ebi.ac.uk/QuickGO/GTerm?id=GO:0035966
5	5	cytokine biosynthetic process	GO:0042089	0.338	0.576	HSPB1|1.337774448	1	74	121	21829	http://www.ebi.ac.uk/QuickGO/GTerm?id=GO:0042089
5	5	Golgi organization	GO:0007030	0.338	0.576	A0A3Q2U769|0.584188784	1	74	121	21829	http://www.ebi.ac.uk/QuickGO/GTerm?id=GO:0007030
9	9	protein peptidyl-prolyl isomerization	GO:0000413	0.341	0.581	FKBP12.6|0.773369444	1	75	121	21829	http://www.ebi.ac.uk/QuickGO/GTerm?id=GO:0000413
8	5,6,7,8	positive regulation of ion transmembrane transport	GO:0034767	0.341	0.581	HSP70|1.283172572	1	75	121	21829	http://www.ebi.ac.uk/QuickGO/GTerm?id=GO:0034767
5	5	cytokine metabolic process	GO:0042107	0.341	0.581	HSPB1|1.337774448	1	75	121	21829	http://www.ebi.ac.uk/QuickGO/GTerm?id=GO:0042107
5	5	positive regulation of cellular catabolic process	GO:0031331	0.343	0.583	A0A3Q2UCH4|1.308620615;Rchy1|0.707606765	2	219	121	21829	http://www.ebi.ac.uk/QuickGO/GTerm?id=GO:0031331
6	6	glycerophospholipid metabolic process	GO:0006650	0.345	0.583	IMPA1|1.338855168;PRDX6|1.247143535	2	220	121	21829	http://www.ebi.ac.uk/QuickGO/GTerm?id=GO:0006650
6	6	lipid homeostasis	GO:0055088	0.345	0.583	ORMDL3|0.402916918	1	76	121	21829	http://www.ebi.ac.uk/QuickGO/GTerm?id=GO:0055088
4	4	regeneration	GO:0031099	0.345	0.583	FKBP12.6|0.773369444	1	76	121	21829	http://www.ebi.ac.uk/QuickGO/GTerm?id=GO:0031099
4	4	cell recognition	GO:0008037	0.345	0.583	GYPC|0.786106154	1	76	121	21829	http://www.ebi.ac.uk/QuickGO/GTerm?id=GO:0008037
7	7	tricarboxylic acid metabolic process	GO:0072350	0.345	0.583	SDHA|1.217654696	1	76	121	21829	http://www.ebi.ac.uk/QuickGO/GTerm?id=GO:0072350
6	5,6	cellular polysaccharide metabolic process	GO:0044264	0.345	0.583	PPP1CB|0.799006051	1	76	121	21829	http://www.ebi.ac.uk/QuickGO/GTerm?id=GO:0044264
8	8	peptidyl-threonine phosphorylation	GO:0018107	0.349	0.588	CAB39|1.21239245	1	77	121	21829	http://www.ebi.ac.uk/QuickGO/GTerm?id=GO:0018107
9	7,8,9	positive regulation of proteasomal protein catabolic process	GO:1901800	0.349	0.588	Rchy1|0.707606765	1	77	121	21829	http://www.ebi.ac.uk/QuickGO/GTerm?id=GO:1901800
8	8	peptidyl-serine phosphorylation	GO:0018105	0.349	0.588	CAB39|1.21239245;PRKCA|0.487532754	2	222	121	21829	http://www.ebi.ac.uk/QuickGO/GTerm?id=GO:0018105
6	5,6	negative regulation of intracellular signal transduction	GO:1902532	0.349	0.588	UCH-L1|1.43716929;HSPB1|1.337774448;FKBP12.6|0.773369444	3	378	121	21829	http://www.ebi.ac.uk/QuickGO/GTerm?id=GO:1902532
6	4,5,6	positive regulation of cell cycle	GO:0045787	0.351	0.59	RANBP1|1.340088175;HSP70|1.283172572	2	223	121	21829	http://www.ebi.ac.uk/QuickGO/GTerm?id=GO:0045787
4	4	head development	GO:0060322	0.351	0.59	ATP5F1|1.373436785;MBP|0.690656099;FKBP12.6|0.773369444;DPYSL2|0.795640031	4	540	121	21829	http://www.ebi.ac.uk/QuickGO/GTerm?id=GO:0060322
5	5	positive regulation of angiogenesis	GO:0045766	0.356	0.597	HSPB1|1.337774448	1	79	121	21829	http://www.ebi.ac.uk/QuickGO/GTerm?id=GO:0045766
7	7	monocarboxylic acid catabolic process	GO:0072329	0.356	0.597	ACAT1|1.26178047	1	79	121	21829	http://www.ebi.ac.uk/QuickGO/GTerm?id=GO:0072329
5	4,5	cell development	GO:0048468	0.357	0.597	KBTBD10|1.353350665;UCH-L1|1.43716929;LMOD3|1.522555731;MYOM2|1.223302409;MYPN|1.223593919;MYBPC2|1.243510197;HSP70|1.283172572;FLNB|0.613099367;FKBP12.6|0.773369444;DPYSL2|0.795640031;GLIPR2|0.785712158	11	1721	121	21829	http://www.ebi.ac.uk/QuickGO/GTerm?id=GO:0048468
6	6	cellular protein catabolic process	GO:0044257	0.357	0.597	UCH-L1|1.43716929;PSMD6|1.32702021;RANBP1|1.340088175;CUL2|0.771088233;Rchy1|0.707606765	5	709	121	21829	http://www.ebi.ac.uk/QuickGO/GTerm?id=GO:0044257
8	6,7,8	cellular glucose homeostasis	GO:0001678	0.359	0.599	FKBP12.6|0.773369444	1	80	121	21829	http://www.ebi.ac.uk/QuickGO/GTerm?id=GO:0001678
5	5	polysaccharide metabolic process	GO:0005976	0.359	0.599	PPP1CB|0.799006051	1	80	121	21829	http://www.ebi.ac.uk/QuickGO/GTerm?id=GO:0005976
6	4,5,6	positive regulation of lipid metabolic process	GO:0045834	0.359	0.599	A0A3Q3AZP2|1.434367428	1	80	121	21829	http://www.ebi.ac.uk/QuickGO/GTerm?id=GO:0045834
6	6	cardiac muscle cell differentiation	GO:0055007	0.359	0.599	MYPN|1.223593919	1	80	121	21829	http://www.ebi.ac.uk/QuickGO/GTerm?id=GO:0055007
5	5	embryo development	GO:0009790	0.363	0.602	GPI|1.354148803;A0A3Q2U769|0.584188784;MTHFD1L|0.749713642;LAMA4|0.797937472;FKBP12.6|0.773369444	5	714	121	21829	http://www.ebi.ac.uk/QuickGO/GTerm?id=GO:0009790
6	6	smooth muscle contraction	GO:0006939	0.363	0.602	FKBP12.6|0.773369444	1	81	121	21829	http://www.ebi.ac.uk/QuickGO/GTerm?id=GO:0006939
8	8	peptidyl-threonine modification	GO:0018210	0.363	0.602	CAB39|1.21239245	1	81	121	21829	http://www.ebi.ac.uk/QuickGO/GTerm?id=GO:0018210
5	5	spermatid development	GO:0007286	0.363	0.602	HSP70|1.283172572	1	81	121	21829	http://www.ebi.ac.uk/QuickGO/GTerm?id=GO:0007286
7	4,5,6,7	positive regulation of transmembrane transport	GO:0034764	0.367	0.607	HSP70|1.283172572	1	82	121	21829	http://www.ebi.ac.uk/QuickGO/GTerm?id=GO:0034764
8	5,7,8	regulation of endothelial cell migration	GO:0010594	0.367	0.607	HSPB1|1.337774448	1	82	121	21829	http://www.ebi.ac.uk/QuickGO/GTerm?id=GO:0010594
7	7	protein phosphorylation	GO:0006468	0.368	0.608	A0A3Q2UCH4|1.308620615;PTGES3|1.249959146;CAMK2D|1.395725167;A0A3Q3AZP2|1.434367428;UCH-L1|1.43716929;HSPB1|1.337774448;HSP70|1.283172572;CAB39|1.21239245;SPEG|0.804476254;PRKAB2|0.71569607;PRKCA|0.487532754;GLIPR2|0.785712158	12	1908	121	21829	http://www.ebi.ac.uk/QuickGO/GTerm?id=GO:0006468
4	4	regulation of body fluid levels	GO:0050878	0.369	0.61	HSPB1|1.337774448;FGB|0.807555904	2	232	121	21829	http://www.ebi.ac.uk/QuickGO/GTerm?id=GO:0050878
4	4	adult locomotory behavior	GO:0008344	0.37	0.61	UCH-L1|1.43716929	1	83	121	21829	http://www.ebi.ac.uk/QuickGO/GTerm?id=GO:0008344
8	7,8	determination of left/right symmetry	GO:0007368	0.37	0.61	A0A3Q2U769|0.584188784	1	83	121	21829	http://www.ebi.ac.uk/QuickGO/GTerm?id=GO:0007368
3	3	regulation of locomotion	GO:0040012	0.37	0.61	MYPN|1.223593919;HSPB1|1.337774448;LAMA4|0.797937472;GLIPR2|0.785712158	4	555	121	21829	http://www.ebi.ac.uk/QuickGO/GTerm?id=GO:0040012
6	6	macroautophagy	GO:0016236	0.371	0.61	A0A3Q2UCH4|1.308620615;MYOM1|1.254881107	2	233	121	21829	http://www.ebi.ac.uk/QuickGO/GTerm?id=GO:0016236
5	5	response to peptide	GO:1901652	0.371	0.61	A0A3Q2TTX7|1.32240644;A0A3Q3ATJ1|1.201501275	2	233	121	21829	http://www.ebi.ac.uk/QuickGO/GTerm?id=GO:1901652
5	4,5	multicellular organismal homeostasis	GO:0048871	0.373	0.613	AMPD3|1.306784743;HSPB1|1.337774448	2	234	121	21829	http://www.ebi.ac.uk/QuickGO/GTerm?id=GO:0048871
4	4	spermatid differentiation	GO:0048515	0.374	0.613	HSP70|1.283172572	1	84	121	21829	http://www.ebi.ac.uk/QuickGO/GTerm?id=GO:0048515
2	2	developmental process	GO:0032502	0.374	0.614	KBTBD10|1.353350665;PBXIP1|1.284159514;UCH-L1|1.43716929;LMOD3|1.522555731;PDLIM3|1.286425032;GPI|1.354148803;MYOM2|1.223302409;SDHA|1.217654696;ATP5F1|1.373436785;MYPN|1.223593919;HSPB1|1.337774448;SMYD1|1.332742776;MYBPC2|1.243510197;TAGLN|1.249989286;SH3KBP1|1.234699811;HSP70|1.283172572;ALDOC|1.365001997;A0A3Q2U769|0.584188784;FLNB|0.613099367;MTHFD1L|0.749713642;LAMA4|0.797937472;FBLN2|0.537…	27	4539	121	21829	http://www.ebi.ac.uk/QuickGO/GTerm?id=GO:0032502
6	6	negative regulation of transferase activity	GO:0051348	0.375	0.614	UCH-L1|1.43716929;HSPB1|1.337774448	2	235	121	21829	http://www.ebi.ac.uk/QuickGO/GTerm?id=GO:0051348
8	8	peptidyl-serine modification	GO:0018209	0.377	0.617	CAB39|1.21239245;PRKCA|0.487532754	2	236	121	21829	http://www.ebi.ac.uk/QuickGO/GTerm?id=GO:0018209
8	8	response to glucose	GO:0009749	0.377	0.617	FKBP12.6|0.773369444	1	85	121	21829	http://www.ebi.ac.uk/QuickGO/GTerm?id=GO:0009749
10	6,7,8,9,10	regulation of protein secretion	GO:0050708	0.379	0.618	GPI|1.354148803;FKBP12.6|0.773369444	2	237	121	21829	http://www.ebi.ac.uk/QuickGO/GTerm?id=GO:0050708
6	4,5,6	positive regulation of cell-substrate adhesion	GO:0010811	0.381	0.618	FBLN2|0.537261949	1	86	121	21829	http://www.ebi.ac.uk/QuickGO/GTerm?id=GO:0010811
7	7	response to hexose	GO:0009746	0.381	0.618	FKBP12.6|0.773369444	1	86	121	21829	http://www.ebi.ac.uk/QuickGO/GTerm?id=GO:0009746
6	6	response to monosaccharide	GO:0034284	0.381	0.618	FKBP12.6|0.773369444	1	86	121	21829	http://www.ebi.ac.uk/QuickGO/GTerm?id=GO:0034284
4	4	fatty acid derivative metabolic process	GO:1901568	0.381	0.618	ACAT1|1.26178047	1	86	121	21829	http://www.ebi.ac.uk/QuickGO/GTerm?id=GO:1901568
6	5,6	axis specification	GO:0009798	0.381	0.618	A0A3Q2U769|0.584188784	1	86	121	21829	http://www.ebi.ac.uk/QuickGO/GTerm?id=GO:0009798
5	5	cell-cell adhesion via plasma-membrane adhesion molecules	GO:0098742	0.381	0.618	GYPC|0.786106154;MPZ|0.531735444	2	238	121	21829	http://www.ebi.ac.uk/QuickGO/GTerm?id=GO:0098742
8	7,8	axon development	GO:0061564	0.381	0.618	UCH-L1|1.43716929;FKBP12.6|0.773369444;DPYSL2|0.795640031	3	399	121	21829	http://www.ebi.ac.uk/QuickGO/GTerm?id=GO:0061564
5	5	cellular protein localization	GO:0034613	0.382	0.618	HSPB1|1.337774448;RANBP1|1.340088175;KPNA4|1.24977891;RAB5C|2.549741805;TIMM13|1.33072494;BCAP31|0.807755804;A0A3Q2U769|0.584188784;SAMM50|0.563408826;KPNA3|0.806756534	9	1411	121	21829	http://www.ebi.ac.uk/QuickGO/GTerm?id=GO:0034613
6	6	regulation of cell morphogenesis involved in differentiation	GO:0010769	0.383	0.618	DPYSL2|0.795640031;GLIPR2|0.785712158	2	239	121	21829	http://www.ebi.ac.uk/QuickGO/GTerm?id=GO:0010769
4	4	regulation of catalytic activity	GO:0050790	0.383	0.618	A0A3Q2U6J9|1.340342648;A0A3Q2UCH4|1.308620615;A0A3Q3AZP2|1.434367428;UCH-L1|1.43716929;ARHGDIA|1.261342819;HSPB1|1.337774448;RANBP1|1.340088175;HSP70|1.283172572;CAB39|1.21239245;A0A3Q2U769|0.584188784;PRKAB2|0.71569607;PPP1R2|0.797609752;FKBP12.6|0.773369444	13	2104	121	21829	http://www.ebi.ac.uk/QuickGO/GTerm?id=GO:0050790
10	8,9,10	positive regulation of protein ubiquitination	GO:0031398	0.384	0.618	Rchy1|0.707606765	1	87	121	21829	http://www.ebi.ac.uk/QuickGO/GTerm?id=GO:0031398
7	6,7	aerobic respiration	GO:0009060	0.384	0.618	SDHA|1.217654696	1	87	121	21829	http://www.ebi.ac.uk/QuickGO/GTerm?id=GO:0009060
8	7,8	positive regulation of proteolysis involved in cellular protein catabolic process	GO:1903052	0.384	0.618	Rchy1|0.707606765	1	87	121	21829	http://www.ebi.ac.uk/QuickGO/GTerm?id=GO:1903052
7	6,7	segmentation	GO:0035282	0.384	0.618	A0A3Q2U769|0.584188784	1	87	121	21829	http://www.ebi.ac.uk/QuickGO/GTerm?id=GO:0035282
6	3,5,6	negative regulation of establishment of protein localization	GO:1904950	0.384	0.618	FKBP12.6|0.773369444	1	87	121	21829	http://www.ebi.ac.uk/QuickGO/GTerm?id=GO:1904950
6	6	regulation of autophagy	GO:0010506	0.387	0.622	A0A3Q2UCH4|1.308620615;MYOM1|1.254881107	2	241	121	21829	http://www.ebi.ac.uk/QuickGO/GTerm?id=GO:0010506
10	5,6,8,9,10	regulation of cyclin-dependent protein kinase activity	GO:1904029	0.387	0.622	HSP70|1.283172572	1	88	121	21829	http://www.ebi.ac.uk/QuickGO/GTerm?id=GO:1904029
6	4,5,6	regulation of receptor activity	GO:0010469	0.387	0.622	FKBP12.6|0.773369444	1	88	121	21829	http://www.ebi.ac.uk/QuickGO/GTerm?id=GO:0010469
4	4	cellular macromolecule localization	GO:0070727	0.389	0.623	HSPB1|1.337774448;RANBP1|1.340088175;KPNA4|1.24977891;RAB5C|2.549741805;TIMM13|1.33072494;BCAP31|0.807755804;A0A3Q2U769|0.584188784;SAMM50|0.563408826;KPNA3|0.806756534	9	1420	121	21829	http://www.ebi.ac.uk/QuickGO/GTerm?id=GO:0070727
5	5	regulation of cell morphogenesis	GO:0022604	0.39	0.624	SH3KBP1|1.234699811;DPYSL2|0.795640031;GLIPR2|0.785712158	3	405	121	21829	http://www.ebi.ac.uk/QuickGO/GTerm?id=GO:0022604
4	4	positive regulation of vasculature development	GO:1904018	0.391	0.624	HSPB1|1.337774448	1	89	121	21829	http://www.ebi.ac.uk/QuickGO/GTerm?id=GO:1904018
6	6	G2/M transition of mitotic cell cycle	GO:0000086	0.391	0.624	HSP70|1.283172572	1	89	121	21829	http://www.ebi.ac.uk/QuickGO/GTerm?id=GO:0000086
6	6	somite development	GO:0061053	0.391	0.624	A0A3Q2U769|0.584188784	1	89	121	21829	http://www.ebi.ac.uk/QuickGO/GTerm?id=GO:0061053
6	5,6	organophosphate ester transport	GO:0015748	0.391	0.624	A0A3Q3AZP2|1.434367428	1	89	121	21829	http://www.ebi.ac.uk/QuickGO/GTerm?id=GO:0015748
4	4	regulation of cellular component movement	GO:0051270	0.392	0.624	MYPN|1.223593919;HSPB1|1.337774448;LAMA4|0.797937472;GLIPR2|0.785712158	4	572	121	21829	http://www.ebi.ac.uk/QuickGO/GTerm?id=GO:0051270
9	7,8,9	positive regulation of kinase activity	GO:0033674	0.392	0.624	A0A3Q3AZP2|1.434367428;HSP70|1.283172572;CAB39|1.21239245	3	406	121	21829	http://www.ebi.ac.uk/QuickGO/GTerm?id=GO:0033674
5	4,5	cellular carbohydrate metabolic process	GO:0044262	0.393	0.625	IMPA1|1.338855168;PPP1CB|0.799006051	2	244	121	21829	http://www.ebi.ac.uk/QuickGO/GTerm?id=GO:0044262
5	5	lipid catabolic process	GO:0016042	0.395	0.627	ACAT1|1.26178047;PRDX6|1.247143535	2	245	121	21829	http://www.ebi.ac.uk/QuickGO/GTerm?id=GO:0016042
10	9,10	cellular calcium ion homeostasis	GO:0006874	0.395	0.627	RYR3|1.208753681;FKBP12.6|0.773369444	2	245	121	21829	http://www.ebi.ac.uk/QuickGO/GTerm?id=GO:0006874
7	6,7	embryonic skeletal system morphogenesis	GO:0048704	0.398	0.63	MTHFD1L|0.749713642	1	91	121	21829	http://www.ebi.ac.uk/QuickGO/GTerm?id=GO:0048704
7	6,7	positive regulation of mitochondrion organization	GO:0010822	0.398	0.63	A0A3Q2UCH4|1.308620615	1	91	121	21829	http://www.ebi.ac.uk/QuickGO/GTerm?id=GO:0010822
3	3	single-organism cellular process	GO:0044763	0.4	0.633	KBTBD10|1.353350665;PBXIP1|1.284159514;RYR3|1.208753681;ATP2B4|1.454010951;IMPA1|1.338855168;ATP2B2|1.385296881;TXNRD3|1.204580616;UCH-L1|1.43716929;ACAT1|1.26178047;LMOD3|1.522555731;CILP|1.39877359;MYOM1|1.254881107;PRDX6|1.247143535;AMPD3|1.306784743;PDLIM3|1.286425032;GPI|1.354148803;MYOM2|1.223302409;SDHA|1.217654696;ATP5F1|1.373436785;PGK1|1.22553449;ADSSL1|1.469655536;ARL8B|1.209421094;MYP…	68	11925	121	21829	http://www.ebi.ac.uk/QuickGO/GTerm?id=GO:0044763
7	6,7	determination of bilateral symmetry	GO:0009855	0.401	0.633	A0A3Q2U769|0.584188784	1	92	121	21829	http://www.ebi.ac.uk/QuickGO/GTerm?id=GO:0009855
7	4,5,6,7	meiotic nuclear division	GO:0007126	0.401	0.633	HSP70|1.283172572	1	92	121	21829	http://www.ebi.ac.uk/QuickGO/GTerm?id=GO:0007126
5	5	mesoderm development	GO:0007498	0.401	0.633	GPI|1.354148803	1	92	121	21829	http://www.ebi.ac.uk/QuickGO/GTerm?id=GO:0007498
6	5,6	regulation of lipid biosynthetic process	GO:0046890	0.404	0.637	ORMDL3|0.402916918	1	93	121	21829	http://www.ebi.ac.uk/QuickGO/GTerm?id=GO:0046890
6	5,6	specification of symmetry	GO:0009799	0.404	0.637	A0A3Q2U769|0.584188784	1	93	121	21829	http://www.ebi.ac.uk/QuickGO/GTerm?id=GO:0009799
7	6,7	calcium-mediated signaling	GO:0019722	0.404	0.637	FKBP12.6|0.773369444	1	93	121	21829	http://www.ebi.ac.uk/QuickGO/GTerm?id=GO:0019722
5	5	response to carbohydrate	GO:0009743	0.408	0.638	FKBP12.6|0.773369444	1	94	121	21829	http://www.ebi.ac.uk/QuickGO/GTerm?id=GO:0009743
5	5	neuron projection extension	GO:1990138	0.408	0.638	DPYSL2|0.795640031	1	94	121	21829	http://www.ebi.ac.uk/QuickGO/GTerm?id=GO:1990138
11	6,8,9,10,11	regulation of insulin secretion	GO:0050796	0.408	0.638	FKBP12.6|0.773369444	1	94	121	21829	http://www.ebi.ac.uk/QuickGO/GTerm?id=GO:0050796
5	5	regulation of striated muscle tissue development	GO:0016202	0.408	0.638	LMOD3|1.522555731	1	94	121	21829	http://www.ebi.ac.uk/QuickGO/GTerm?id=GO:0016202
4	4	regulation of synaptic plasticity	GO:0048167	0.408	0.638	ENSGALG00000027330|1.235499055	1	94	121	21829	http://www.ebi.ac.uk/QuickGO/GTerm?id=GO:0048167
9	8,9	regulation of peptidyl-serine phosphorylation	GO:0033135	0.408	0.638	CAB39|1.21239245	1	94	121	21829	http://www.ebi.ac.uk/QuickGO/GTerm?id=GO:0033135
4	4	cellular amino acid metabolic process	GO:0006520	0.409	0.64	ACAT1|1.26178047;BLMH|1.469427111;MTHFD1L|0.749713642	3	418	121	21829	http://www.ebi.ac.uk/QuickGO/GTerm?id=GO:0006520
3	3	regulation of molecular function	GO:0065009	0.41	0.64	A0A3Q2U6J9|1.340342648;A0A3Q2UCH4|1.308620615;A0A3Q3AZP2|1.434367428;UCH-L1|1.43716929;ARHGDIA|1.261342819;HSPB1|1.337774448;RANBP1|1.340088175;EDF1|1.274072423;HSP70|1.283172572;CAB39|1.21239245;A0A3Q2U769|0.584188784;PRKAB2|0.71569607;PPP1R2|0.797609752;FXYD6|0.766199089;FKBP12.6|0.773369444	15	2494	121	21829	http://www.ebi.ac.uk/QuickGO/GTerm?id=GO:0065009
11	9,10,11	positive regulation of protein serine/threonine kinase activity	GO:0071902	0.41	0.64	HSP70|1.283172572;CAB39|1.21239245	2	253	121	21829	http://www.ebi.ac.uk/QuickGO/GTerm?id=GO:0071902
5	5	cell differentiation	GO:0030154	0.41	0.64	KBTBD10|1.353350665;PBXIP1|1.284159514;UCH-L1|1.43716929;LMOD3|1.522555731;MYOM2|1.223302409;MYPN|1.223593919;SMYD1|1.332742776;MYBPC2|1.243510197;TAGLN|1.249989286;HSP70|1.283172572;ALDOC|1.365001997;FLNB|0.613099367;LAMA4|0.797937472;FBLN2|0.537261949;FKBP12.6|0.773369444;DPYSL2|0.795640031;GLIPR2|0.785712158	17	2847	121	21829	http://www.ebi.ac.uk/QuickGO/GTerm?id=GO:0030154
4	4	positive regulation of immune effector process	GO:0002699	0.411	0.641	GPI|1.354148803	1	95	121	21829	http://www.ebi.ac.uk/QuickGO/GTerm?id=GO:0002699
5	5	cell cycle G2/M phase transition	GO:0044839	0.414	0.644	HSP70|1.283172572	1	96	121	21829	http://www.ebi.ac.uk/QuickGO/GTerm?id=GO:0044839
5	5	membrane lipid biosynthetic process	GO:0046467	0.414	0.644	ORMDL3|0.402916918	1	96	121	21829	http://www.ebi.ac.uk/QuickGO/GTerm?id=GO:0046467
6	5,6	regulation of muscle organ development	GO:0048634	0.414	0.644	LMOD3|1.522555731	1	96	121	21829	http://www.ebi.ac.uk/QuickGO/GTerm?id=GO:0048634
9	9	calcium ion homeostasis	GO:0055074	0.416	0.645	RYR3|1.208753681;FKBP12.6|0.773369444	2	256	121	21829	http://www.ebi.ac.uk/QuickGO/GTerm?id=GO:0055074
5	4,5	positive regulation of catabolic process	GO:0009896	0.416	0.645	A0A3Q2UCH4|1.308620615;Rchy1|0.707606765	2	256	121	21829	http://www.ebi.ac.uk/QuickGO/GTerm?id=GO:0009896
3	3	single-multicellular organism process	GO:0044707	0.417	0.645	KBTBD10|1.353350665;UCH-L1|1.43716929;LMOD3|1.522555731;MYOM1|1.254881107;AMPD3|1.306784743;PDLIM3|1.286425032;GPI|1.354148803;MYOM2|1.223302409;SDHA|1.217654696;ATP5F1|1.373436785;MYPN|1.223593919;HSPB1|1.337774448;SMYD1|1.332742776;ENSGALG00000002907|1.322866394;ATP2A1|1.2337889;ENSGALG00000027330|1.235499055;FLNB|0.613099367;MTHFD1L|0.749713642;LAMA4|0.797937472;FBLN2|0.537261949;MBP|0.6906560…	28	4805	121	21829	http://www.ebi.ac.uk/QuickGO/GTerm?id=GO:0044707
4	4	positive regulation of response to wounding	GO:1903036	0.417	0.645	FKBP12.6|0.773369444	1	97	121	21829	http://www.ebi.ac.uk/QuickGO/GTerm?id=GO:1903036
7	6,7	regulation of protein kinase B signaling	GO:0051896	0.417	0.645	A0A3Q3AZP2|1.434367428	1	97	121	21829	http://www.ebi.ac.uk/QuickGO/GTerm?id=GO:0051896
5	5	ameboidal-type cell migration	GO:0001667	0.418	0.645	HSPB1|1.337774448;GLIPR2|0.785712158	2	257	121	21829	http://www.ebi.ac.uk/QuickGO/GTerm?id=GO:0001667
4	4	cell-substrate adhesion	GO:0031589	0.418	0.645	NID2|0.740439165;FBLN2|0.537261949	2	257	121	21829	http://www.ebi.ac.uk/QuickGO/GTerm?id=GO:0031589
5	5	neuromuscular process	GO:0050905	0.421	0.649	UCH-L1|1.43716929	1	98	121	21829	http://www.ebi.ac.uk/QuickGO/GTerm?id=GO:0050905
7	6,7	positive regulation of cellular protein catabolic process	GO:1903364	0.421	0.649	Rchy1|0.707606765	1	98	121	21829	http://www.ebi.ac.uk/QuickGO/GTerm?id=GO:1903364
6	5,6	cellular response to starvation	GO:0009267	0.422	0.649	MYOM1|1.254881107;ALB|1.487005807	2	259	121	21829	http://www.ebi.ac.uk/QuickGO/GTerm?id=GO:0009267
5	4,5	maintenance of location in cell	GO:0051651	0.424	0.652	ALB|1.487005807	1	99	121	21829	http://www.ebi.ac.uk/QuickGO/GTerm?id=GO:0051651
8	8	peptidyl-proline modification	GO:0018208	0.427	0.655	FKBP12.6|0.773369444	1	100	121	21829	http://www.ebi.ac.uk/QuickGO/GTerm?id=GO:0018208
4	4	regulation of muscle tissue development	GO:1901861	0.427	0.655	LMOD3|1.522555731	1	100	121	21829	http://www.ebi.ac.uk/QuickGO/GTerm?id=GO:1901861
6	5,6	RNA transport	GO:0050658	0.427	0.655	RANBP1|1.340088175	1	100	121	21829	http://www.ebi.ac.uk/QuickGO/GTerm?id=GO:0050658
7	7	nucleic acid transport	GO:0050657	0.427	0.655	RANBP1|1.340088175	1	100	121	21829	http://www.ebi.ac.uk/QuickGO/GTerm?id=GO:0050657
5	4,5	animal organ development	GO:0048513	0.429	0.656	KBTBD10|1.353350665;LMOD3|1.522555731;PDLIM3|1.286425032;ATP5F1|1.373436785;MYPN|1.223593919;SMYD1|1.332742776;A0A3Q2U769|0.584188784;FLNB|0.613099367;MTHFD1L|0.749713642;FBLN2|0.537261949;MBP|0.690656099;FKBP12.6|0.773369444;DPYSL2|0.795640031;GLIPR2|0.785712158	14	2348	121	21829	http://www.ebi.ac.uk/QuickGO/GTerm?id=GO:0048513
9	7,8,9	positive regulation of protein modification by small protein conjugation or removal	GO:1903322	0.43	0.658	Rchy1|0.707606765	1	101	121	21829	http://www.ebi.ac.uk/QuickGO/GTerm?id=GO:1903322
5	5	positive regulation of binding	GO:0051099	0.43	0.658	EDF1|1.274072423	1	101	121	21829	http://www.ebi.ac.uk/QuickGO/GTerm?id=GO:0051099
4	4	response to starvation	GO:0042594	0.433	0.659	MYOM1|1.254881107;ALB|1.487005807	2	265	121	21829	http://www.ebi.ac.uk/QuickGO/GTerm?id=GO:0042594
3	3	single-organism developmental process	GO:0044767	0.433	0.659	KBTBD10|1.353350665;PBXIP1|1.284159514;UCH-L1|1.43716929;LMOD3|1.522555731;PDLIM3|1.286425032;GPI|1.354148803;MYOM2|1.223302409;SDHA|1.217654696;ATP5F1|1.373436785;MYPN|1.223593919;HSPB1|1.337774448;SMYD1|1.332742776;MYBPC2|1.243510197;TAGLN|1.249989286;SH3KBP1|1.234699811;HSP70|1.283172572;ALDOC|1.365001997;FLNB|0.613099367;MTHFD1L|0.749713642;LAMA4|0.797937472;FBLN2|0.537261949;MBP|0.690656099;…	26	4483	121	21829	http://www.ebi.ac.uk/QuickGO/GTerm?id=GO:0044767
6	5,6	regulation of embryonic development	GO:0045995	0.434	0.659	LAMA4|0.797937472	1	102	121	21829	http://www.ebi.ac.uk/QuickGO/GTerm?id=GO:0045995
7	5,6,7	positive regulation of mitotic cell cycle	GO:0045931	0.434	0.659	RANBP1|1.340088175	1	102	121	21829	http://www.ebi.ac.uk/QuickGO/GTerm?id=GO:0045931
5	4,5	establishment of RNA localization	GO:0051236	0.434	0.659	RANBP1|1.340088175	1	102	121	21829	http://www.ebi.ac.uk/QuickGO/GTerm?id=GO:0051236
5	5	cardiocyte differentiation	GO:0035051	0.434	0.659	MYPN|1.223593919	1	102	121	21829	http://www.ebi.ac.uk/QuickGO/GTerm?id=GO:0035051
3	3	single-organism metabolic process	GO:0044710	0.434	0.66	DHRS7C|1.334774673;IMPA1|1.338855168;TXNRD3|1.204580616;UCH-L1|1.43716929;ACAT1|1.26178047;MYOM1|1.254881107;PRDX6|1.247143535;AMPD3|1.306784743;GPI|1.354148803;SDHA|1.217654696;ATP5F1|1.373436785;PGK1|1.22553449;ADSSL1|1.469655536;CYB5R3|1.501083223;LDHA|1.406541698;ENO3|1.243593921;BLMH|1.469427111;UBE2V2|1.250642582;OARD1|1.518785107;HSP70|1.283172572;CAB39|1.21239245;COX7C|1.254685321;ALDOC|1…	30	5198	121	21829	http://www.ebi.ac.uk/QuickGO/GTerm?id=GO:0044710
8	4,5,7,8	negative regulation of secretion by cell	GO:1903531	0.437	0.663	FKBP12.6|0.773369444	1	103	121	21829	http://www.ebi.ac.uk/QuickGO/GTerm?id=GO:1903531
9	8,9	cellular divalent inorganic cation homeostasis	GO:0072503	0.439	0.665	RYR3|1.208753681;FKBP12.6|0.773369444	2	268	121	21829	http://www.ebi.ac.uk/QuickGO/GTerm?id=GO:0072503
6	4,6	regulation of cell shape	GO:0008360	0.44	0.666	SH3KBP1|1.234699811	1	104	121	21829	http://www.ebi.ac.uk/QuickGO/GTerm?id=GO:0008360
5	5	positive regulation of cell migration	GO:0030335	0.443	0.67	HSPB1|1.337774448;GLIPR2|0.785712158	2	270	121	21829	http://www.ebi.ac.uk/QuickGO/GTerm?id=GO:0030335
7	5,6,7	negative regulation of phosphorus metabolic process	GO:0010563	0.443	0.67	UCH-L1|1.43716929;HSPB1|1.337774448;FKBP12.6|0.773369444	3	441	121	21829	http://www.ebi.ac.uk/QuickGO/GTerm?id=GO:0010563
6	6	negative regulation of phosphate metabolic process	GO:0045936	0.443	0.67	UCH-L1|1.43716929;HSPB1|1.337774448;FKBP12.6|0.773369444	3	441	121	21829	http://www.ebi.ac.uk/QuickGO/GTerm?id=GO:0045936
5	5	learning	GO:0007612	0.446	0.673	ENSGALG00000027330|1.235499055	1	106	121	21829	http://www.ebi.ac.uk/QuickGO/GTerm?id=GO:0007612
4	4	formation of primary germ layer	GO:0001704	0.446	0.673	GPI|1.354148803	1	106	121	21829	http://www.ebi.ac.uk/QuickGO/GTerm?id=GO:0001704
5	5	embryonic organ morphogenesis	GO:0048562	0.448	0.675	A0A3Q2U769|0.584188784;MTHFD1L|0.749713642	2	273	121	21829	http://www.ebi.ac.uk/QuickGO/GTerm?id=GO:0048562
10	5,6,7,8,9,10	positive regulation of protein secretion	GO:0050714	0.449	0.675	GPI|1.354148803	1	107	121	21829	http://www.ebi.ac.uk/QuickGO/GTerm?id=GO:0050714
6	4,5,6	positive regulation of cell division	GO:0051781	0.449	0.675	RANBP1|1.340088175	1	107	121	21829	http://www.ebi.ac.uk/QuickGO/GTerm?id=GO:0051781
5	5	cellular response to nutrient levels	GO:0031669	0.45	0.676	MYOM1|1.254881107;ALB|1.487005807	2	274	121	21829	http://www.ebi.ac.uk/QuickGO/GTerm?id=GO:0031669
5	5	glycerolipid metabolic process	GO:0046486	0.45	0.676	IMPA1|1.338855168;PRDX6|1.247143535	2	274	121	21829	http://www.ebi.ac.uk/QuickGO/GTerm?id=GO:0046486
5	5	centrosome organization	GO:0051297	0.452	0.678	RANBP1|1.340088175	1	108	121	21829	http://www.ebi.ac.uk/QuickGO/GTerm?id=GO:0051297
5	5	regulation of stem cell differentiation	GO:2000736	0.452	0.678	GLIPR2|0.785712158	1	108	121	21829	http://www.ebi.ac.uk/QuickGO/GTerm?id=GO:2000736
5	4,5	positive regulation of cell motility	GO:2000147	0.454	0.679	HSPB1|1.337774448;GLIPR2|0.785712158	2	276	121	21829	http://www.ebi.ac.uk/QuickGO/GTerm?id=GO:2000147
7	5,6,7	epithelial tube morphogenesis	GO:0060562	0.457	0.684	A0A3Q2U769|0.584188784;MTHFD1L|0.749713642	2	278	121	21829	http://www.ebi.ac.uk/QuickGO/GTerm?id=GO:0060562
5	4,5	centrosome cycle	GO:0007098	0.458	0.685	RANBP1|1.340088175	1	110	121	21829	http://www.ebi.ac.uk/QuickGO/GTerm?id=GO:0007098
4	3,4	regulation of cell adhesion	GO:0030155	0.459	0.686	LAMA4|0.797937472;FBLN2|0.537261949;PPP1CB|0.799006051	3	452	121	21829	http://www.ebi.ac.uk/QuickGO/GTerm?id=GO:0030155
5	4,5	positive regulation of cell differentiation	GO:0045597	0.46	0.686	LMOD3|1.522555731;SMYD1|1.332742776;FKBP12.6|0.773369444;GLIPR2|0.785712158	4	627	121	21829	http://www.ebi.ac.uk/QuickGO/GTerm?id=GO:0045597
6	6	epithelial cell differentiation	GO:0030855	0.462	0.689	TAGLN|1.249989286;ALDOC|1.365001997;FLNB|0.613099367	3	454	121	21829	http://www.ebi.ac.uk/QuickGO/GTerm?id=GO:0030855
4	4	regulation of chemotaxis	GO:0050920	0.464	0.69	HSPB1|1.337774448	1	112	121	21829	http://www.ebi.ac.uk/QuickGO/GTerm?id=GO:0050920
7	6,7	regulation of intrinsic apoptotic signaling pathway	GO:2001242	0.464	0.69	HSPB1|1.337774448	1	112	121	21829	http://www.ebi.ac.uk/QuickGO/GTerm?id=GO:2001242
5	5	mitotic cell cycle phase transition	GO:0044772	0.465	0.69	RANBP1|1.340088175;HSP70|1.283172572	2	282	121	21829	http://www.ebi.ac.uk/QuickGO/GTerm?id=GO:0044772
10	7,8,10	regulation of neuron projection development	GO:0010975	0.465	0.69	FKBP12.6|0.773369444;DPYSL2|0.795640031	2	282	121	21829	http://www.ebi.ac.uk/QuickGO/GTerm?id=GO:0010975
6	6	positive regulation of transferase activity	GO:0051347	0.465	0.69	A0A3Q3AZP2|1.434367428;HSP70|1.283172572;CAB39|1.21239245	3	456	121	21829	http://www.ebi.ac.uk/QuickGO/GTerm?id=GO:0051347
3	3	production of molecular mediator of immune response	GO:0002440	0.467	0.692	GPI|1.354148803	1	113	121	21829	http://www.ebi.ac.uk/QuickGO/GTerm?id=GO:0002440
4	3,4	regulation of behavior	GO:0050795	0.467	0.692	HSPB1|1.337774448	1	113	121	21829	http://www.ebi.ac.uk/QuickGO/GTerm?id=GO:0050795
8	8	divalent inorganic cation homeostasis	GO:0072507	0.468	0.693	RYR3|1.208753681;FKBP12.6|0.773369444	2	284	121	21829	http://www.ebi.ac.uk/QuickGO/GTerm?id=GO:0072507
4	4	positive regulation of cellular component movement	GO:0051272	0.468	0.693	HSPB1|1.337774448;GLIPR2|0.785712158	2	284	121	21829	http://www.ebi.ac.uk/QuickGO/GTerm?id=GO:0051272
4	4	regulation of transport	GO:0051049	0.47	0.695	A0A3Q2TTX7|1.32240644;CATSPER2|1.202421769;A0A3Q3ATJ1|1.201501275;GPI|1.354148803;HSP70|1.283172572;RAB5C|2.549741805;FXYD6|0.766199089;FKBP12.6|0.773369444	8	1344	121	21829	http://www.ebi.ac.uk/QuickGO/GTerm?id=GO:0051049
4	4	cellular lipid metabolic process	GO:0044255	0.471	0.696	IMPA1|1.338855168;A0A3Q3AZP2|1.434367428;ACAT1|1.26178047;PRDX6|1.247143535;ORMDL3|0.402916918	5	813	121	21829	http://www.ebi.ac.uk/QuickGO/GTerm?id=GO:0044255
3	3	positive regulation of locomotion	GO:0040017	0.472	0.696	HSPB1|1.337774448;GLIPR2|0.785712158	2	286	121	21829	http://www.ebi.ac.uk/QuickGO/GTerm?id=GO:0040017
8	7,8	nuclear export	GO:0051168	0.473	0.696	RANBP1|1.340088175	1	115	121	21829	http://www.ebi.ac.uk/QuickGO/GTerm?id=GO:0051168
7	4,6,7	negative regulation of secretion	GO:0051048	0.473	0.696	FKBP12.6|0.773369444	1	115	121	21829	http://www.ebi.ac.uk/QuickGO/GTerm?id=GO:0051048
7	7	monovalent inorganic cation transport	GO:0015672	0.473	0.696	ATP5F1|1.373436785;COX7C|1.254685321;A0A3Q3AUQ1|0.818305002;FXYD6|0.766199089	4	638	121	21829	http://www.ebi.ac.uk/QuickGO/GTerm?id=GO:0015672
4	4	cellular response to extracellular stimulus	GO:0031668	0.474	0.696	MYOM1|1.254881107;ALB|1.487005807	2	287	121	21829	http://www.ebi.ac.uk/QuickGO/GTerm?id=GO:0031668
7	6,7	negative regulation of MAPK cascade	GO:0043409	0.476	0.697	UCH-L1|1.43716929	1	116	121	21829	http://www.ebi.ac.uk/QuickGO/GTerm?id=GO:0043409
5	5	actin filament bundle assembly	GO:0051017	0.476	0.697	ENSGALG00000027330|1.235499055	1	116	121	21829	http://www.ebi.ac.uk/QuickGO/GTerm?id=GO:0051017
9	8,9	tRNA processing	GO:0008033	0.476	0.697	RTCB|1.284666414	1	116	121	21829	http://www.ebi.ac.uk/QuickGO/GTerm?id=GO:0008033
7	7	regulation of axonogenesis	GO:0050770	0.476	0.697	DPYSL2|0.795640031	1	116	121	21829	http://www.ebi.ac.uk/QuickGO/GTerm?id=GO:0050770
7	6,7	negative regulation of protein modification process	GO:0031400	0.476	0.697	UCH-L1|1.43716929;HSPB1|1.337774448;FKBP12.6|0.773369444	3	464	121	21829	http://www.ebi.ac.uk/QuickGO/GTerm?id=GO:0031400
3	3	response to stress	GO:0006950	0.477	0.697	A0A3Q2UCH4|1.308620615;A0A3Q2UDT6|1.205693283;UCH-L1|1.43716929;MYOM1|1.254881107;PRDX6|1.247143535;HSPB1|1.337774448;CKM|1.28135235;ALB|1.487005807;UBE2V2|1.250642582;KPNA4|1.24977891;HSP70|1.283172572;ERP44|0.745186445;SRSF5|0.613528475;FGB|0.807555904;FKBP12.6|0.773369444	15	2601	121	21829	http://www.ebi.ac.uk/QuickGO/GTerm?id=GO:0006950
8	4,8	signal transduction by protein phosphorylation	GO:0023014	0.478	0.698	A0A3Q3AZP2|1.434367428;UCH-L1|1.43716929;CAB39|1.21239245;GLIPR2|0.785712158	4	642	121	21829	http://www.ebi.ac.uk/QuickGO/GTerm?id=GO:0023014
7	6,7	T cell proliferation	GO:0042098	0.479	0.699	FKBP12.6|0.773369444	1	117	121	21829	http://www.ebi.ac.uk/QuickGO/GTerm?id=GO:0042098
5	5	protein catabolic process	GO:0030163	0.48	0.699	UCH-L1|1.43716929;PSMD6|1.32702021;RANBP1|1.340088175;CUL2|0.771088233;Rchy1|0.707606765	5	821	121	21829	http://www.ebi.ac.uk/QuickGO/GTerm?id=GO:0030163
6	5,6	inositol lipid-mediated signaling	GO:0048017	0.482	0.699	A0A3Q3AZP2|1.434367428	1	118	121	21829	http://www.ebi.ac.uk/QuickGO/GTerm?id=GO:0048017
5	5	sphingolipid metabolic process	GO:0006665	0.482	0.699	ORMDL3|0.402916918	1	118	121	21829	http://www.ebi.ac.uk/QuickGO/GTerm?id=GO:0006665
8	7,8	actin filament bundle organization	GO:0061572	0.482	0.699	ENSGALG00000027330|1.235499055	1	118	121	21829	http://www.ebi.ac.uk/QuickGO/GTerm?id=GO:0061572
6	5,6	protein kinase B signaling	GO:0043491	0.482	0.699	A0A3Q3AZP2|1.434367428	1	118	121	21829	http://www.ebi.ac.uk/QuickGO/GTerm?id=GO:0043491
4	4	RNA localization	GO:0006403	0.482	0.699	RANBP1|1.340088175	1	118	121	21829	http://www.ebi.ac.uk/QuickGO/GTerm?id=GO:0006403
10	5,7,8,9,10	regulation of peptide hormone secretion	GO:0090276	0.482	0.699	FKBP12.6|0.773369444	1	118	121	21829	http://www.ebi.ac.uk/QuickGO/GTerm?id=GO:0090276
5	3,4,5	regulation of homeostatic process	GO:0032844	0.483	0.7	RYR3|1.208753681;FKBP12.6|0.773369444	2	292	121	21829	http://www.ebi.ac.uk/QuickGO/GTerm?id=GO:0032844
6	5,6	cellular chemical homeostasis	GO:0055082	0.484	0.7	RYR3|1.208753681;FKBP12.6|0.773369444;ORMDL3|0.402916918	3	469	121	21829	http://www.ebi.ac.uk/QuickGO/GTerm?id=GO:0055082
6	6	epidermal cell differentiation	GO:0009913	0.485	0.7	FLNB|0.613099367	1	119	121	21829	http://www.ebi.ac.uk/QuickGO/GTerm?id=GO:0009913
9	6,7,8,9	regulation of peptide secretion	GO:0002791	0.485	0.7	FKBP12.6|0.773369444	1	119	121	21829	http://www.ebi.ac.uk/QuickGO/GTerm?id=GO:0002791
7	7	endothelial cell migration	GO:0043542	0.485	0.7	HSPB1|1.337774448	1	119	121	21829	http://www.ebi.ac.uk/QuickGO/GTerm?id=GO:0043542
6	6	cellular protein modification process	GO:0006464	0.487	0.701	DUSP3|1.289465091;A0A3Q2UCH4|1.308620615;PTGES3|1.249959146;CAMK2D|1.395725167;A0A3Q3AZP2|1.434367428;UCH-L1|1.43716929;HSPB1|1.337774448;UBE2V2|1.250642582;HSP70|1.283172572;CAB39|1.21239245;DPH5|0.719312178;SPEG|0.804476254;COPS7B|0.663774909;CUL2|0.771088233;ADPRH|0.719227667;PPP1CB|0.799006051;PRKAB2|0.71569607;PPP1R2|0.797609752;PRKCA|0.487532754;Rchy1|0.707606765;GLRX5|0.502973712;FKBP12.6|…	23	4053	121	21829	http://www.ebi.ac.uk/QuickGO/GTerm?id=GO:0006464
5	5	protein modification process	GO:0036211	0.487	0.701	DUSP3|1.289465091;A0A3Q2UCH4|1.308620615;PTGES3|1.249959146;CAMK2D|1.395725167;A0A3Q3AZP2|1.434367428;UCH-L1|1.43716929;HSPB1|1.337774448;UBE2V2|1.250642582;HSP70|1.283172572;CAB39|1.21239245;DPH5|0.719312178;SPEG|0.804476254;COPS7B|0.663774909;CUL2|0.771088233;ADPRH|0.719227667;PPP1CB|0.799006051;PRKAB2|0.71569607;PPP1R2|0.797609752;PRKCA|0.487532754;Rchy1|0.707606765;GLRX5|0.502973712;FKBP12.6|…	23	4053	121	21829	http://www.ebi.ac.uk/QuickGO/GTerm?id=GO:0036211
7	7	DNA-templated transcription, initiation	GO:0006352	0.488	0.701	SUB1|0.814720615	1	120	121	21829	http://www.ebi.ac.uk/QuickGO/GTerm?id=GO:0006352
6	5,6	positive regulation of cell morphogenesis involved in differentiation	GO:0010770	0.488	0.701	GLIPR2|0.785712158	1	120	121	21829	http://www.ebi.ac.uk/QuickGO/GTerm?id=GO:0010770
4	4	cellular developmental process	GO:0048869	0.488	0.701	KBTBD10|1.353350665;PBXIP1|1.284159514;UCH-L1|1.43716929;LMOD3|1.522555731;MYOM2|1.223302409;MYPN|1.223593919;SMYD1|1.332742776;MYBPC2|1.243510197;TAGLN|1.249989286;SH3KBP1|1.234699811;HSP70|1.283172572;ALDOC|1.365001997;FLNB|0.613099367;LAMA4|0.797937472;FBLN2|0.537261949;FKBP12.6|0.773369444;DPYSL2|0.795640031;GLIPR2|0.785712158	18	3157	121	21829	http://www.ebi.ac.uk/QuickGO/GTerm?id=GO:0048869
5	5	wound healing	GO:0042060	0.488	0.702	HSPB1|1.337774448;FGB|0.807555904	2	295	121	21829	http://www.ebi.ac.uk/QuickGO/GTerm?id=GO:0042060
4	4	system development	GO:0048731	0.489	0.702	KBTBD10|1.353350665;UCH-L1|1.43716929;LMOD3|1.522555731;PDLIM3|1.286425032;SDHA|1.217654696;ATP5F1|1.373436785;MYPN|1.223593919;HSPB1|1.337774448;SMYD1|1.332742776;A0A3Q2U769|0.584188784;FLNB|0.613099367;MTHFD1L|0.749713642;LAMA4|0.797937472;FBLN2|0.537261949;MBP|0.690656099;MPZ|0.531735444;FKBP12.6|0.773369444;DPYSL2|0.795640031;GLIPR2|0.785712158	19	3339	121	21829	http://www.ebi.ac.uk/QuickGO/GTerm?id=GO:0048731
6	5,6	cell morphogenesis involved in differentiation	GO:0000904	0.491	0.704	UCH-L1|1.43716929;FLNB|0.613099367;DPYSL2|0.795640031;GLIPR2|0.785712158	4	653	121	21829	http://www.ebi.ac.uk/QuickGO/GTerm?id=GO:0000904
8	6,7,8	regulation of translation	GO:0006417	0.492	0.704	EIF3I|1.293629736;DPH5|0.719312178	2	297	121	21829	http://www.ebi.ac.uk/QuickGO/GTerm?id=GO:0006417
7	6,7	nucleocytoplasmic transport	GO:0006913	0.492	0.704	RANBP1|1.340088175;KPNA3|0.806756534	2	297	121	21829	http://www.ebi.ac.uk/QuickGO/GTerm?id=GO:0006913
7	5,6,7	negative regulation of cellular amide metabolic process	GO:0034249	0.493	0.704	ORMDL3|0.402916918	1	122	121	21829	http://www.ebi.ac.uk/QuickGO/GTerm?id=GO:0034249
4	4	microtubule organizing center organization	GO:0031023	0.493	0.704	RANBP1|1.340088175	1	122	121	21829	http://www.ebi.ac.uk/QuickGO/GTerm?id=GO:0031023
10	6,7,8,9,10	insulin secretion	GO:0030073	0.493	0.704	FKBP12.6|0.773369444	1	122	121	21829	http://www.ebi.ac.uk/QuickGO/GTerm?id=GO:0030073
6	6	carboxylic acid biosynthetic process	GO:0046394	0.494	0.704	ENO1|1.301513562;MTHFD1L|0.749713642	2	298	121	21829	http://www.ebi.ac.uk/QuickGO/GTerm?id=GO:0046394
5	5	organic acid biosynthetic process	GO:0016053	0.494	0.704	ENO1|1.301513562;MTHFD1L|0.749713642	2	298	121	21829	http://www.ebi.ac.uk/QuickGO/GTerm?id=GO:0016053
5	5	cellular response to organonitrogen compound	GO:0071417	0.497	0.708	A0A3Q2TTX7|1.32240644;A0A3Q3ATJ1|1.201501275	2	300	121	21829	http://www.ebi.ac.uk/QuickGO/GTerm?id=GO:0071417
5	5	regulation of cell development	GO:0060284	0.497	0.708	LMOD3|1.522555731;FKBP12.6|0.773369444;DPYSL2|0.795640031;GLIPR2|0.785712158	4	658	121	21829	http://www.ebi.ac.uk/QuickGO/GTerm?id=GO:0060284
5	3,5	positive regulation of homeostatic process	GO:0032846	0.502	0.712	FKBP12.6|0.773369444	1	125	121	21829	http://www.ebi.ac.uk/QuickGO/GTerm?id=GO:0032846
6	5,6	skin development	GO:0043588	0.502	0.712	FLNB|0.613099367	1	125	121	21829	http://www.ebi.ac.uk/QuickGO/GTerm?id=GO:0043588
6	6	embryonic skeletal system development	GO:0048706	0.502	0.712	MTHFD1L|0.749713642	1	125	121	21829	http://www.ebi.ac.uk/QuickGO/GTerm?id=GO:0048706
5	5	central nervous system development	GO:0007417	0.504	0.715	ATP5F1|1.373436785;MBP|0.690656099;FKBP12.6|0.773369444;DPYSL2|0.795640031	4	664	121	21829	http://www.ebi.ac.uk/QuickGO/GTerm?id=GO:0007417
5	5	regulation of cell size	GO:0008361	0.505	0.715	DPYSL2|0.795640031	1	126	121	21829	http://www.ebi.ac.uk/QuickGO/GTerm?id=GO:0008361
11	8,9,10,11	regulation of proteasomal ubiquitin-dependent protein catabolic process	GO:0032434	0.505	0.715	Rchy1|0.707606765	1	126	121	21829	http://www.ebi.ac.uk/QuickGO/GTerm?id=GO:0032434
4	4	cell cycle phase transition	GO:0044770	0.506	0.716	RANBP1|1.340088175;HSP70|1.283172572	2	305	121	21829	http://www.ebi.ac.uk/QuickGO/GTerm?id=GO:0044770
4	4	response to oxygen-containing compound	GO:1901700	0.507	0.717	A0A3Q2TTX7|1.32240644;A0A3Q3ATJ1|1.201501275;KPNA4|1.24977891;HSP70|1.283172572;FKBP12.6|0.773369444	5	847	121	21829	http://www.ebi.ac.uk/QuickGO/GTerm?id=GO:1901700
8	6,8	alpha-amino acid biosynthetic process	GO:1901607	0.507	0.717	MTHFD1L|0.749713642	1	127	121	21829	http://www.ebi.ac.uk/QuickGO/GTerm?id=GO:1901607
4	4	protein metabolic process	GO:0019538	0.508	0.717	DUSP3|1.289465091;A0A3Q2U6J9|1.340342648;A0A3Q2UCH4|1.308620615;PTGES3|1.249959146;A0A3Q2UDT6|1.205693283;CAMK2D|1.395725167;A0A3Q3AZP2|1.434367428;UCH-L1|1.43716929;EIF3I|1.293629736;PSMD6|1.32702021;NPEPL1|1.259782993;EEF1B2|1.322594905;HSPB1|1.337774448;RPL27|1.485323169;BLMH|1.469427111;UBE2V2|1.250642582;RANBP1|1.340088175;HSP70|1.283172572;CAB39|1.21239245;CAPN1|0.796189874;DPH5|0.719312178…	35	6254	121	21829	http://www.ebi.ac.uk/QuickGO/GTerm?id=GO:0019538
7	6,7	positive regulation of protein modification process	GO:0031401	0.508	0.717	A0A3Q3AZP2|1.434367428;HSP70|1.283172572;CAB39|1.21239245;Rchy1|0.707606765;GLIPR2|0.785712158	5	848	121	21829	http://www.ebi.ac.uk/QuickGO/GTerm?id=GO:0031401
5	4,5	developmental cell growth	GO:0048588	0.51	0.718	DPYSL2|0.795640031	1	128	121	21829	http://www.ebi.ac.uk/QuickGO/GTerm?id=GO:0048588
7	5,7	cellular amino acid biosynthetic process	GO:0008652	0.51	0.718	MTHFD1L|0.749713642	1	128	121	21829	http://www.ebi.ac.uk/QuickGO/GTerm?id=GO:0008652
8	5,6,7,8	regulation of mitotic nuclear division	GO:0007088	0.513	0.721	RANBP1|1.340088175	1	129	121	21829	http://www.ebi.ac.uk/QuickGO/GTerm?id=GO:0007088
5	5	response to lipid	GO:0033993	0.517	0.726	ALB|1.487005807;HSP70|1.283172572;FKBP12.6|0.773369444	3	493	121	21829	http://www.ebi.ac.uk/QuickGO/GTerm?id=GO:0033993
4	4	response to radiation	GO:0009314	0.518	0.727	ENSGALG00000027330|1.235499055;PPP1CB|0.799006051	2	312	121	21829	http://www.ebi.ac.uk/QuickGO/GTerm?id=GO:0009314
6	4,6	response to hypoxia	GO:0001666	0.518	0.727	A0A3Q2UDT6|1.205693283	1	131	121	21829	http://www.ebi.ac.uk/QuickGO/GTerm?id=GO:0001666
4	4	movement of cell or subcellular component	GO:0006928	0.519	0.728	A0A3Q3ATJ1|1.201501275;UCH-L1|1.43716929;MYPN|1.223593919;HSPB1|1.337774448;SH3KBP1|1.234699811;LAMA4|0.797937472;DPYSL2|0.795640031;GLIPR2|0.785712158	8	1403	121	21829	http://www.ebi.ac.uk/QuickGO/GTerm?id=GO:0006928
6	6	G1/S transition of mitotic cell cycle	GO:0000082	0.521	0.728	RANBP1|1.340088175	1	132	121	21829	http://www.ebi.ac.uk/QuickGO/GTerm?id=GO:0000082
5	5	response to decreased oxygen levels	GO:0036293	0.521	0.728	A0A3Q2UDT6|1.205693283	1	132	121	21829	http://www.ebi.ac.uk/QuickGO/GTerm?id=GO:0036293
4	4	spindle organization	GO:0007051	0.521	0.728	RANBP1|1.340088175	1	132	121	21829	http://www.ebi.ac.uk/QuickGO/GTerm?id=GO:0007051
3	3	single-organism behavior	GO:0044708	0.521	0.729	UCH-L1|1.43716929;ENSGALG00000027330|1.235499055	2	314	121	21829	http://www.ebi.ac.uk/QuickGO/GTerm?id=GO:0044708
8	7,8	positive regulation of protein phosphorylation	GO:0001934	0.523	0.73	A0A3Q3AZP2|1.434367428;HSP70|1.283172572;CAB39|1.21239245;GLIPR2|0.785712158	4	680	121	21829	http://www.ebi.ac.uk/QuickGO/GTerm?id=GO:0001934
4	4	meiotic cell cycle process	GO:1903046	0.524	0.73	HSP70|1.283172572	1	133	121	21829	http://www.ebi.ac.uk/QuickGO/GTerm?id=GO:1903046
6	6	nucleobase-containing compound transport	GO:0015931	0.524	0.73	RANBP1|1.340088175	1	133	121	21829	http://www.ebi.ac.uk/QuickGO/GTerm?id=GO:0015931
4	4	tube morphogenesis	GO:0035239	0.525	0.731	A0A3Q2U769|0.584188784;MTHFD1L|0.749713642	2	316	121	21829	http://www.ebi.ac.uk/QuickGO/GTerm?id=GO:0035239
10	10	protein polyubiquitination	GO:0000209	0.526	0.732	UBE2V2|1.250642582	1	134	121	21829	http://www.ebi.ac.uk/QuickGO/GTerm?id=GO:0000209
4	4	adult behavior	GO:0030534	0.529	0.734	UCH-L1|1.43716929	1	135	121	21829	http://www.ebi.ac.uk/QuickGO/GTerm?id=GO:0030534
7	4,7	translational initiation	GO:0006413	0.529	0.734	EIF3I|1.293629736	1	135	121	21829	http://www.ebi.ac.uk/QuickGO/GTerm?id=GO:0006413
8	5,6,7,8	mesenchymal cell development	GO:0014031	0.529	0.734	GLIPR2|0.785712158	1	135	121	21829	http://www.ebi.ac.uk/QuickGO/GTerm?id=GO:0014031
4	4	cellular response to external stimulus	GO:0071496	0.53	0.734	MYOM1|1.254881107;ALB|1.487005807	2	319	121	21829	http://www.ebi.ac.uk/QuickGO/GTerm?id=GO:0071496
5	4,5	regulation of cell-substrate adhesion	GO:0010810	0.532	0.734	FBLN2|0.537261949	1	136	121	21829	http://www.ebi.ac.uk/QuickGO/GTerm?id=GO:0010810
6	5,6	regulation of endocytosis	GO:0030100	0.532	0.734	RAB5C|2.549741805	1	136	121	21829	http://www.ebi.ac.uk/QuickGO/GTerm?id=GO:0030100
8	7,8	negative regulation of protein phosphorylation	GO:0001933	0.532	0.734	UCH-L1|1.43716929;HSPB1|1.337774448	2	320	121	21829	http://www.ebi.ac.uk/QuickGO/GTerm?id=GO:0001933
9	8,9	cellular metal ion homeostasis	GO:0006875	0.532	0.734	RYR3|1.208753681;FKBP12.6|0.773369444	2	320	121	21829	http://www.ebi.ac.uk/QuickGO/GTerm?id=GO:0006875
5	5	signal release	GO:0023061	0.532	0.734	PRKCA|0.487532754;FKBP12.6|0.773369444	2	320	121	21829	http://www.ebi.ac.uk/QuickGO/GTerm?id=GO:0023061
5	5	response to organonitrogen compound	GO:0010243	0.532	0.734	A0A3Q2TTX7|1.32240644;A0A3Q3ATJ1|1.201501275;HSP70|1.283172572	3	504	121	21829	http://www.ebi.ac.uk/QuickGO/GTerm?id=GO:0010243
7	4,6,7	negative regulation of protein transport	GO:0051224	0.537	0.739	FKBP12.6|0.773369444	1	138	121	21829	http://www.ebi.ac.uk/QuickGO/GTerm?id=GO:0051224
4	4	response to oxygen levels	GO:0070482	0.537	0.739	A0A3Q2UDT6|1.205693283	1	138	121	21829	http://www.ebi.ac.uk/QuickGO/GTerm?id=GO:0070482
5	5	cellular protein metabolic process	GO:0044267	0.539	0.741	DUSP3|1.289465091;A0A3Q2U6J9|1.340342648;A0A3Q2UCH4|1.308620615;PTGES3|1.249959146;CAMK2D|1.395725167;A0A3Q3AZP2|1.434367428;UCH-L1|1.43716929;EIF3I|1.293629736;PSMD6|1.32702021;EEF1B2|1.322594905;HSPB1|1.337774448;RPL27|1.485323169;UBE2V2|1.250642582;RANBP1|1.340088175;HSP70|1.283172572;CAB39|1.21239245;DPH5|0.719312178;SPEG|0.804476254;ERP44|0.745186445;COPS7B|0.663774909;CUL2|0.771088233;ADPRH…	30	5420	121	21829	http://www.ebi.ac.uk/QuickGO/GTerm?id=GO:0044267
11	6,7,8,9,11	positive regulation of neuron projection development	GO:0010976	0.539	0.741	FKBP12.6|0.773369444	1	139	121	21829	http://www.ebi.ac.uk/QuickGO/GTerm?id=GO:0010976
3	3	positive regulation of developmental process	GO:0051094	0.539	0.741	LMOD3|1.522555731;HSPB1|1.337774448;SMYD1|1.332742776;FKBP12.6|0.773369444;GLIPR2|0.785712158	5	878	121	21829	http://www.ebi.ac.uk/QuickGO/GTerm?id=GO:0051094
7	7	chordate embryonic development	GO:0043009	0.54	0.742	A0A3Q2U769|0.584188784;MTHFD1L|0.749713642	2	325	121	21829	http://www.ebi.ac.uk/QuickGO/GTerm?id=GO:0043009
7	5,7	chromatin remodeling	GO:0006338	0.542	0.743	SMYD1|1.332742776	1	140	121	21829	http://www.ebi.ac.uk/QuickGO/GTerm?id=GO:0006338
5	4,5	multicellular organism growth	GO:0035264	0.542	0.743	A0A3Q2U769|0.584188784	1	140	121	21829	http://www.ebi.ac.uk/QuickGO/GTerm?id=GO:0035264
2	2	behavior	GO:0007610	0.544	0.745	UCH-L1|1.43716929;HSPB1|1.337774448;ENSGALG00000027330|1.235499055	3	513	121	21829	http://www.ebi.ac.uk/QuickGO/GTerm?id=GO:0007610
5	5	regulation of peptide transport	GO:0090087	0.544	0.745	FKBP12.6|0.773369444	1	141	121	21829	http://www.ebi.ac.uk/QuickGO/GTerm?id=GO:0090087
6	5,6	second-messenger-mediated signaling	GO:0019932	0.544	0.745	FKBP12.6|0.773369444	1	141	121	21829	http://www.ebi.ac.uk/QuickGO/GTerm?id=GO:0019932
4	4	regulation of hormone levels	GO:0010817	0.547	0.746	PRKCA|0.487532754;FKBP12.6|0.773369444	2	329	121	21829	http://www.ebi.ac.uk/QuickGO/GTerm?id=GO:0010817
6	4,6	positive regulation of ion transport	GO:0043270	0.547	0.746	HSP70|1.283172572	1	142	121	21829	http://www.ebi.ac.uk/QuickGO/GTerm?id=GO:0043270
5	5	cell cycle G1/S phase transition	GO:0044843	0.547	0.746	RANBP1|1.340088175	1	142	121	21829	http://www.ebi.ac.uk/QuickGO/GTerm?id=GO:0044843
5	5	cellular macromolecule catabolic process	GO:0044265	0.548	0.746	UCH-L1|1.43716929;PSMD6|1.32702021;RANBP1|1.340088175;CUL2|0.771088233;Rchy1|0.707606765	5	886	121	21829	http://www.ebi.ac.uk/QuickGO/GTerm?id=GO:0044265
5	5	regulation of microtubule cytoskeleton organization	GO:0070507	0.55	0.748	RANBP1|1.340088175	1	143	121	21829	http://www.ebi.ac.uk/QuickGO/GTerm?id=GO:0070507
5	4,5	regulation of cellular response to stress	GO:0080135	0.552	0.751	MYOM1|1.254881107;HSPB1|1.337774448;FKBP12.6|0.773369444	3	519	121	21829	http://www.ebi.ac.uk/QuickGO/GTerm?id=GO:0080135
4	4	regulation of protein stability	GO:0031647	0.552	0.751	HSP70|1.283172572	1	144	121	21829	http://www.ebi.ac.uk/QuickGO/GTerm?id=GO:0031647
6	6	fat cell differentiation	GO:0045444	0.557	0.756	LAMA4|0.797937472	1	146	121	21829	http://www.ebi.ac.uk/QuickGO/GTerm?id=GO:0045444
8	7,8	positive regulation of phosphorylation	GO:0042327	0.557	0.756	A0A3Q3AZP2|1.434367428;HSP70|1.283172572;CAB39|1.21239245;GLIPR2|0.785712158	4	710	121	21829	http://www.ebi.ac.uk/QuickGO/GTerm?id=GO:0042327
7	7	protein modification by small protein conjugation or removal	GO:0070647	0.558	0.756	UCH-L1|1.43716929;UBE2V2|1.250642582;COPS7B|0.663774909;CUL2|0.771088233;Rchy1|0.707606765	5	896	121	21829	http://www.ebi.ac.uk/QuickGO/GTerm?id=GO:0070647
7	7	monocarboxylic acid biosynthetic process	GO:0072330	0.56	0.758	ENO1|1.301513562	1	147	121	21829	http://www.ebi.ac.uk/QuickGO/GTerm?id=GO:0072330
7	7	phosphatidylinositol metabolic process	GO:0046488	0.56	0.758	IMPA1|1.338855168	1	147	121	21829	http://www.ebi.ac.uk/QuickGO/GTerm?id=GO:0046488
8	8	regulation of cysteine-type endopeptidase activity	GO:2000116	0.562	0.758	A0A3Q2U6J9|1.340342648	1	148	121	21829	http://www.ebi.ac.uk/QuickGO/GTerm?id=GO:2000116
3	3	multi-organism cellular process	GO:0044764	0.562	0.758	ALB|1.487005807	1	148	121	21829	http://www.ebi.ac.uk/QuickGO/GTerm?id=GO:0044764
6	5,6	positive regulation of protein catabolic process	GO:0045732	0.562	0.758	Rchy1|0.707606765	1	148	121	21829	http://www.ebi.ac.uk/QuickGO/GTerm?id=GO:0045732
9	6,7,8,9	regulation of MAPK cascade	GO:0043408	0.562	0.758	A0A3Q3AZP2|1.434367428;UCH-L1|1.43716929;GLIPR2|0.785712158	3	527	121	21829	http://www.ebi.ac.uk/QuickGO/GTerm?id=GO:0043408
4	4	tube development	GO:0035295	0.562	0.758	A0A3Q2U769|0.584188784;MTHFD1L|0.749713642;FKBP12.6|0.773369444	3	527	121	21829	http://www.ebi.ac.uk/QuickGO/GTerm?id=GO:0035295
4	4	response to acid chemical	GO:0001101	0.564	0.761	FKBP12.6|0.773369444	1	149	121	21829	http://www.ebi.ac.uk/QuickGO/GTerm?id=GO:0001101
3	3	cellular metabolic process	GO:0044237	0.568	0.763	PBXIP1|1.284159514;IMPA1|1.338855168;DUSP3|1.289465091;ENO1|1.301513562;A0A3Q2U6J9|1.340342648;A0A3Q2UCH4|1.308620615;PTGES3|1.249959146;A0A3Q2UEL1|1.305534201;CAMK2D|1.395725167;A0A3Q3AZP2|1.434367428;UCH-L1|1.43716929;ACAT1|1.26178047;EIF3I|1.293629736;PSMD6|1.32702021;MYOM1|1.254881107;PRDX6|1.247143535;MOSPD1|1.300070747;AMPD3|1.306784743;GPI|1.354148803;SDHA|1.217654696;ATP5F1|1.373436785;PG…	64	11623	121	21829	http://www.ebi.ac.uk/QuickGO/GTerm?id=GO:0044237
5	5	cellular response to oxidative stress	GO:0034599	0.569	0.763	HSPB1|1.337774448	1	151	121	21829	http://www.ebi.ac.uk/QuickGO/GTerm?id=GO:0034599
7	5,6,7	regulation of nuclear division	GO:0051783	0.569	0.763	RANBP1|1.340088175	1	151	121	21829	http://www.ebi.ac.uk/QuickGO/GTerm?id=GO:0051783
5	5	regulation of response to extracellular stimulus	GO:0032104	0.569	0.763	MYOM1|1.254881107	1	151	121	21829	http://www.ebi.ac.uk/QuickGO/GTerm?id=GO:0032104
6	6	regulation of response to nutrient levels	GO:0032107	0.569	0.763	MYOM1|1.254881107	1	151	121	21829	http://www.ebi.ac.uk/QuickGO/GTerm?id=GO:0032107
9	8,9	sodium ion transmembrane transport	GO:0035725	0.569	0.763	FXYD6|0.766199089	1	151	121	21829	http://www.ebi.ac.uk/QuickGO/GTerm?id=GO:0035725
4	4	learning or memory	GO:0007611	0.572	0.766	ENSGALG00000027330|1.235499055	1	152	121	21829	http://www.ebi.ac.uk/QuickGO/GTerm?id=GO:0007611
5	5	cardiovascular system development	GO:0072358	0.572	0.766	PDLIM3|1.286425032;HSPB1|1.337774448;SMYD1|1.332742776;LAMA4|0.797937472	4	723	121	21829	http://www.ebi.ac.uk/QuickGO/GTerm?id=GO:0072358
5	5	regulation of cellular catabolic process	GO:0031329	0.574	0.767	A0A3Q2UCH4|1.308620615;MYOM1|1.254881107;Rchy1|0.707606765	3	536	121	21829	http://www.ebi.ac.uk/QuickGO/GTerm?id=GO:0031329
3	3	primary metabolic process	GO:0044238	0.575	0.768	PBXIP1|1.284159514;IMPA1|1.338855168;DUSP3|1.289465091;ENO1|1.301513562;A0A3Q2U6J9|1.340342648;A0A3Q2UCH4|1.308620615;PTGES3|1.249959146;A0A3Q2UDT6|1.205693283;A0A3Q2UEL1|1.305534201;CAMK2D|1.395725167;A0A3Q3AZP2|1.434367428;UCH-L1|1.43716929;GANC|1.205632423;ACAT1|1.26178047;EIF3I|1.293629736;PSMD6|1.32702021;PRDX6|1.247143535;MOSPD1|1.300070747;AMPD3|1.306784743;GPI|1.354148803;SDHA|1.217654696…	65	11820	121	21829	http://www.ebi.ac.uk/QuickGO/GTerm?id=GO:0044238
8	7,8	negative regulation of phosphorylation	GO:0042326	0.576	0.768	UCH-L1|1.43716929;HSPB1|1.337774448	2	347	121	21829	http://www.ebi.ac.uk/QuickGO/GTerm?id=GO:0042326
5	5	autophagy	GO:0006914	0.576	0.768	A0A3Q2UCH4|1.308620615;MYOM1|1.254881107	2	347	121	21829	http://www.ebi.ac.uk/QuickGO/GTerm?id=GO:0006914
4	4	embryonic morphogenesis	GO:0048598	0.576	0.768	GPI|1.354148803;A0A3Q2U769|0.584188784;MTHFD1L|0.749713642	3	538	121	21829	http://www.ebi.ac.uk/QuickGO/GTerm?id=GO:0048598
4	4	germ cell development	GO:0007281	0.576	0.768	HSP70|1.283172572	1	154	121	21829	http://www.ebi.ac.uk/QuickGO/GTerm?id=GO:0007281
5	5	gastrulation	GO:0007369	0.579	0.77	GPI|1.354148803	1	155	121	21829	http://www.ebi.ac.uk/QuickGO/GTerm?id=GO:0007369
5	5	cellular response to nitrogen compound	GO:1901699	0.58	0.77	A0A3Q2TTX7|1.32240644;A0A3Q3ATJ1|1.201501275	2	350	121	21829	http://www.ebi.ac.uk/QuickGO/GTerm?id=GO:1901699
3	3	response to chemical	GO:0042221	0.581	0.77	TXNRD3|1.204580616;A0A3Q2TTX7|1.32240644;A0A3Q2UCH4|1.308620615;A0A3Q2UDT6|1.205693283;A0A3Q3ATJ1|1.201501275;PRDX6|1.247143535;HSPB1|1.337774448;ALB|1.487005807;BLMH|1.469427111;KPNA4|1.24977891;HSP70|1.283172572;ERP44|0.745186445;MBP|0.690656099;FKBP12.6|0.773369444;DPYSL2|0.795640031	15	2772	121	21829	http://www.ebi.ac.uk/QuickGO/GTerm?id=GO:0042221
5	5	epidermis development	GO:0008544	0.581	0.77	FLNB|0.613099367	1	156	121	21829	http://www.ebi.ac.uk/QuickGO/GTerm?id=GO:0008544
7	7	protein deubiquitination	GO:0016579	0.581	0.77	UCH-L1|1.43716929	1	156	121	21829	http://www.ebi.ac.uk/QuickGO/GTerm?id=GO:0016579
4	3,4	meiotic cell cycle	GO:0051321	0.581	0.77	HSP70|1.283172572	1	156	121	21829	http://www.ebi.ac.uk/QuickGO/GTerm?id=GO:0051321
4	4	tissue morphogenesis	GO:0048729	0.581	0.77	GPI|1.354148803;A0A3Q2U769|0.584188784;MTHFD1L|0.749713642	3	542	121	21829	http://www.ebi.ac.uk/QuickGO/GTerm?id=GO:0048729
5	5	chemical homeostasis	GO:0048878	0.583	0.771	RYR3|1.208753681;GPI|1.354148803;FKBP12.6|0.773369444;ORMDL3|0.402916918	4	733	121	21829	http://www.ebi.ac.uk/QuickGO/GTerm?id=GO:0048878
5	5	cardiac muscle tissue development	GO:0048738	0.583	0.771	MYPN|1.223593919	1	157	121	21829	http://www.ebi.ac.uk/QuickGO/GTerm?id=GO:0048738
8	5,6,7,8	negative regulation of apoptotic signaling pathway	GO:2001234	0.583	0.771	HSPB1|1.337774448	1	157	121	21829	http://www.ebi.ac.uk/QuickGO/GTerm?id=GO:2001234
6	5,6	regulation of angiogenesis	GO:0045765	0.583	0.771	HSPB1|1.337774448	1	157	121	21829	http://www.ebi.ac.uk/QuickGO/GTerm?id=GO:0045765
6	5,6	tissue homeostasis	GO:0001894	0.586	0.773	HSPB1|1.337774448	1	158	121	21829	http://www.ebi.ac.uk/QuickGO/GTerm?id=GO:0001894
4	4	regulation of anatomical structure morphogenesis	GO:0022603	0.586	0.773	HSPB1|1.337774448;SH3KBP1|1.234699811;DPYSL2|0.795640031;GLIPR2|0.785712158	4	736	121	21829	http://www.ebi.ac.uk/QuickGO/GTerm?id=GO:0022603
8	6,7,8	positive regulation of MAPK cascade	GO:0043410	0.588	0.775	A0A3Q3AZP2|1.434367428;GLIPR2|0.785712158	2	355	121	21829	http://www.ebi.ac.uk/QuickGO/GTerm?id=GO:0043410
4	4	regulation of microtubule-based process	GO:0032886	0.59	0.776	RANBP1|1.340088175	1	160	121	21829	http://www.ebi.ac.uk/QuickGO/GTerm?id=GO:0032886
5	4,5	positive regulation of cell cycle process	GO:0090068	0.59	0.776	RANBP1|1.340088175	1	160	121	21829	http://www.ebi.ac.uk/QuickGO/GTerm?id=GO:0090068
7	4,7	regulation of hormone secretion	GO:0046883	0.59	0.776	FKBP12.6|0.773369444	1	160	121	21829	http://www.ebi.ac.uk/QuickGO/GTerm?id=GO:0046883
4	4	regulation of membrane potential	GO:0042391	0.591	0.777	A0A3Q3ATJ1|1.201501275;FKBP12.6|0.773369444	2	357	121	21829	http://www.ebi.ac.uk/QuickGO/GTerm?id=GO:0042391
5	5	positive regulation of protein metabolic process	GO:0051247	0.593	0.779	A0A3Q3AZP2|1.434367428;HSPB1|1.337774448;HSP70|1.283172572;CAB39|1.21239245;Rchy1|0.707606765;GLIPR2|0.785712158	6	1121	121	21829	http://www.ebi.ac.uk/QuickGO/GTerm?id=GO:0051247
4	4	multicellular organism development	GO:0007275	0.594	0.78	KBTBD10|1.353350665;UCH-L1|1.43716929;LMOD3|1.522555731;PDLIM3|1.286425032;GPI|1.354148803;SDHA|1.217654696;ATP5F1|1.373436785;MYPN|1.223593919;HSPB1|1.337774448;SMYD1|1.332742776;A0A3Q2U769|0.584188784;FLNB|0.613099367;MTHFD1L|0.749713642;LAMA4|0.797937472;FBLN2|0.537261949;MBP|0.690656099;MPZ|0.531735444;FKBP12.6|0.773369444;DPYSL2|0.795640031;GLIPR2|0.785712158	20	3714	121	21829	http://www.ebi.ac.uk/QuickGO/GTerm?id=GO:0007275
9	8,9	regulation of protein ubiquitination	GO:0031396	0.595	0.78	Rchy1|0.707606765	1	162	121	21829	http://www.ebi.ac.uk/QuickGO/GTerm?id=GO:0031396
5	5	macromolecule modification	GO:0043412	0.597	0.782	DUSP3|1.289465091;A0A3Q2UCH4|1.308620615;PTGES3|1.249959146;CAMK2D|1.395725167;A0A3Q3AZP2|1.434367428;UCH-L1|1.43716929;HSPB1|1.337774448;UBE2V2|1.250642582;HSP70|1.283172572;CAB39|1.21239245;DPH5|0.719312178;SPEG|0.804476254;COPS7B|0.663774909;CUL2|0.771088233;ADPRH|0.719227667;PPP1CB|0.799006051;PRKAB2|0.71569607;PPP1R2|0.797609752;PRKCA|0.487532754;Rchy1|0.707606765;GLRX5|0.502973712;FKBP12.6|…	23	4270	121	21829	http://www.ebi.ac.uk/QuickGO/GTerm?id=GO:0043412
5	5	membrane lipid metabolic process	GO:0006643	0.599	0.784	ORMDL3|0.402916918	1	164	121	21829	http://www.ebi.ac.uk/QuickGO/GTerm?id=GO:0006643
5	5	cell-matrix adhesion	GO:0007160	0.599	0.784	NID2|0.740439165	1	164	121	21829	http://www.ebi.ac.uk/QuickGO/GTerm?id=GO:0007160
8	7,8	mRNA processing	GO:0006397	0.6	0.784	PRDX6|1.247143535;SRSF2|0.465409726	2	363	121	21829	http://www.ebi.ac.uk/QuickGO/GTerm?id=GO:0006397
7	6,7	single-organism nuclear import	GO:1902593	0.602	0.784	KPNA3|0.806756534	1	165	121	21829	http://www.ebi.ac.uk/QuickGO/GTerm?id=GO:1902593
6	5,6	regulation of innate immune response	GO:0045088	0.602	0.784	A0A3Q2UCH4|1.308620615	1	165	121	21829	http://www.ebi.ac.uk/QuickGO/GTerm?id=GO:0045088
10	7,8,9,10	proteasome-mediated ubiquitin-dependent protein catabolic process	GO:0043161	0.602	0.784	PSMD6|1.32702021;Rchy1|0.707606765	2	364	121	21829	http://www.ebi.ac.uk/QuickGO/GTerm?id=GO:0043161
4	4	cell migration	GO:0016477	0.604	0.785	MYPN|1.223593919;HSPB1|1.337774448;SH3KBP1|1.234699811;LAMA4|0.797937472;GLIPR2|0.785712158	5	943	121	21829	http://www.ebi.ac.uk/QuickGO/GTerm?id=GO:0016477
4	4	developmental growth involved in morphogenesis	GO:0060560	0.604	0.785	DPYSL2|0.795640031	1	166	121	21829	http://www.ebi.ac.uk/QuickGO/GTerm?id=GO:0060560
8	7,8	nuclear import	GO:0051170	0.604	0.785	KPNA3|0.806756534	1	166	121	21829	http://www.ebi.ac.uk/QuickGO/GTerm?id=GO:0051170
4	4	cellular response to stress	GO:0033554	0.607	0.789	A0A3Q2UCH4|1.308620615;A0A3Q2UDT6|1.205693283;MYOM1|1.254881107;HSPB1|1.337774448;ALB|1.487005807;UBE2V2|1.250642582;ERP44|0.745186445;FKBP12.6|0.773369444	8	1514	121	21829	http://www.ebi.ac.uk/QuickGO/GTerm?id=GO:0033554
4	4	response to drug	GO:0042493	0.611	0.792	BLMH|1.469427111	1	169	121	21829	http://www.ebi.ac.uk/QuickGO/GTerm?id=GO:0042493
4	4	regulation of immune effector process	GO:0002697	0.611	0.792	GPI|1.354148803	1	169	121	21829	http://www.ebi.ac.uk/QuickGO/GTerm?id=GO:0002697
4	4	regulation of response to external stimulus	GO:0032101	0.612	0.793	MYOM1|1.254881107;HSPB1|1.337774448;FKBP12.6|0.773369444	3	567	121	21829	http://www.ebi.ac.uk/QuickGO/GTerm?id=GO:0032101
7	6,7	protein localization to plasma membrane	GO:0072659	0.613	0.794	A0A3Q2U769|0.584188784	1	170	121	21829	http://www.ebi.ac.uk/QuickGO/GTerm?id=GO:0072659
8	7,8	axonogenesis	GO:0007409	0.614	0.794	UCH-L1|1.43716929;DPYSL2|0.795640031	2	372	121	21829	http://www.ebi.ac.uk/QuickGO/GTerm?id=GO:0007409
6	6	nuclear division	GO:0000280	0.614	0.794	RANBP1|1.340088175;HSP70|1.283172572	2	372	121	21829	http://www.ebi.ac.uk/QuickGO/GTerm?id=GO:0000280
5	5	regulation of vasculature development	GO:1901342	0.615	0.794	HSPB1|1.337774448	1	171	121	21829	http://www.ebi.ac.uk/QuickGO/GTerm?id=GO:1901342
8	7,8	cellular cation homeostasis	GO:0030003	0.615	0.794	RYR3|1.208753681;FKBP12.6|0.773369444	2	373	121	21829	http://www.ebi.ac.uk/QuickGO/GTerm?id=GO:0030003
5	4,5	single-organism transport	GO:0044765	0.616	0.795	RYR3|1.208753681;ATP2B4|1.454010951;ATP2B2|1.385296881;UCH-L1|1.43716929;GPI|1.354148803;ATP5F1|1.373436785;HSPB1|1.337774448;ATP2A1|1.2337889;RANBP1|1.340088175;KPNA4|1.24977891;HSP70|1.283172572;TIMM13|1.33072494;COX7C|1.254685321;SAMM50|0.563408826;LOC100859860|0.744437258;KPNA3|0.806756534;PRKCA|0.487532754;FXYD6|0.766199089;FKBP12.6|0.773369444	19	3572	121	21829	http://www.ebi.ac.uk/QuickGO/GTerm?id=GO:0044765
4	4	response to nitrogen compound	GO:1901698	0.619	0.798	A0A3Q2TTX7|1.32240644;A0A3Q3ATJ1|1.201501275;HSP70|1.283172572	3	573	121	21829	http://www.ebi.ac.uk/QuickGO/GTerm?id=GO:1901698
5	5	cognition	GO:0050890	0.621	0.8	ENSGALG00000027330|1.235499055	1	174	121	21829	http://www.ebi.ac.uk/QuickGO/GTerm?id=GO:0050890
4	4	cell activation	GO:0001775	0.621	0.8	HSPB1|1.337774448;FGB|0.807555904;FKBP12.6|0.773369444	3	575	121	21829	http://www.ebi.ac.uk/QuickGO/GTerm?id=GO:0001775
5	5	response to endoplasmic reticulum stress	GO:0034976	0.623	0.801	ERP44|0.745186445	1	175	121	21829	http://www.ebi.ac.uk/QuickGO/GTerm?id=GO:0034976
6	6	protein localization to cell periphery	GO:1990778	0.623	0.801	A0A3Q2U769|0.584188784	1	175	121	21829	http://www.ebi.ac.uk/QuickGO/GTerm?id=GO:1990778
10	8,9,10	positive regulation of protein kinase activity	GO:0045860	0.624	0.801	HSP70|1.283172572;CAB39|1.21239245	2	379	121	21829	http://www.ebi.ac.uk/QuickGO/GTerm?id=GO:0045860
7	6,7	negative regulation of apoptotic process	GO:0043066	0.625	0.802	A0A3Q2U6J9|1.340342648;HSPB1|1.337774448;ALB|1.487005807	3	578	121	21829	http://www.ebi.ac.uk/QuickGO/GTerm?id=GO:0043066
4	4	organelle localization	GO:0051640	0.628	0.806	ARL8B|1.209421094;ALB|1.487005807	2	382	121	21829	http://www.ebi.ac.uk/QuickGO/GTerm?id=GO:0051640
7	6,7	cellular ion homeostasis	GO:0006873	0.63	0.806	RYR3|1.208753681;FKBP12.6|0.773369444	2	383	121	21829	http://www.ebi.ac.uk/QuickGO/GTerm?id=GO:0006873
8	8	metal ion homeostasis	GO:0055065	0.63	0.806	RYR3|1.208753681;FKBP12.6|0.773369444	2	383	121	21829	http://www.ebi.ac.uk/QuickGO/GTerm?id=GO:0055065
6	4,6	lung development	GO:0030324	0.63	0.806	FKBP12.6|0.773369444	1	178	121	21829	http://www.ebi.ac.uk/QuickGO/GTerm?id=GO:0030324
5	5	cellular response to oxygen-containing compound	GO:1901701	0.634	0.809	A0A3Q2TTX7|1.32240644;A0A3Q3ATJ1|1.201501275;FKBP12.6|0.773369444	3	586	121	21829	http://www.ebi.ac.uk/QuickGO/GTerm?id=GO:1901701
3	3	single-organism localization	GO:1902578	0.635	0.809	RYR3|1.208753681;ATP2B4|1.454010951;ATP2B2|1.385296881;UCH-L1|1.43716929;GPI|1.354148803;ATP5F1|1.373436785;HSPB1|1.337774448;ATP2A1|1.2337889;ALB|1.487005807;RANBP1|1.340088175;KPNA4|1.24977891;HSP70|1.283172572;TIMM13|1.33072494;COX7C|1.254685321;SAMM50|0.563408826;LOC100859860|0.744437258;KPNA3|0.806756534;PRKCA|0.487532754;FXYD6|0.766199089;FKBP12.6|0.773369444	20	3793	121	21829	http://www.ebi.ac.uk/QuickGO/GTerm?id=GO:1902578
5	5	regulation of cell projection organization	GO:0031344	0.635	0.809	FKBP12.6|0.773369444;DPYSL2|0.795640031	2	387	121	21829	http://www.ebi.ac.uk/QuickGO/GTerm?id=GO:0031344
6	5,6	MAPK cascade	GO:0000165	0.635	0.809	A0A3Q3AZP2|1.434367428;UCH-L1|1.43716929;GLIPR2|0.785712158	3	587	121	21829	http://www.ebi.ac.uk/QuickGO/GTerm?id=GO:0000165
6	5,6	negative regulation of programmed cell death	GO:0043069	0.635	0.809	A0A3Q2U6J9|1.340342648;HSPB1|1.337774448;ALB|1.487005807	3	587	121	21829	http://www.ebi.ac.uk/QuickGO/GTerm?id=GO:0043069
4	4	respiratory tube development	GO:0030323	0.636	0.809	FKBP12.6|0.773369444	1	181	121	21829	http://www.ebi.ac.uk/QuickGO/GTerm?id=GO:0030323
7	6,7	regulation of I-kappaB kinase/NF-kappaB signaling	GO:0043122	0.636	0.809	HSPB1|1.337774448	1	181	121	21829	http://www.ebi.ac.uk/QuickGO/GTerm?id=GO:0043122
8	6,7,8	proteasomal protein catabolic process	GO:0010498	0.637	0.809	PSMD6|1.32702021;Rchy1|0.707606765	2	388	121	21829	http://www.ebi.ac.uk/QuickGO/GTerm?id=GO:0010498
4	4	negative regulation of nitrogen compound metabolic process	GO:0051172	0.637	0.809	PBXIP1|1.284159514;A0A3Q2U6J9|1.340342648;MOSPD1|1.300070747;SMYD1|1.332742776;HSP70|1.283172572;ORMDL3|0.402916918	6	1172	121	21829	http://www.ebi.ac.uk/QuickGO/GTerm?id=GO:0051172
5	5	nervous system development	GO:0007399	0.637	0.809	UCH-L1|1.43716929;SDHA|1.217654696;ATP5F1|1.373436785;A0A3Q2U769|0.584188784;MTHFD1L|0.749713642;MBP|0.690656099;MPZ|0.531735444;FKBP12.6|0.773369444;DPYSL2|0.795640031	9	1744	121	21829	http://www.ebi.ac.uk/QuickGO/GTerm?id=GO:0007399
5	5	cell chemotaxis	GO:0060326	0.638	0.809	HSPB1|1.337774448	1	182	121	21829	http://www.ebi.ac.uk/QuickGO/GTerm?id=GO:0060326
4	4	modulation of synaptic transmission	GO:0050804	0.638	0.809	ENSGALG00000027330|1.235499055	1	182	121	21829	http://www.ebi.ac.uk/QuickGO/GTerm?id=GO:0050804
8	7,8	regulation of protein modification by small protein conjugation or removal	GO:1903320	0.642	0.813	Rchy1|0.707606765	1	184	121	21829	http://www.ebi.ac.uk/QuickGO/GTerm?id=GO:1903320
6	5,6	lymphocyte proliferation	GO:0046651	0.646	0.817	FKBP12.6|0.773369444	1	186	121	21829	http://www.ebi.ac.uk/QuickGO/GTerm?id=GO:0046651
8	4,5,7,8	positive regulation of secretion by cell	GO:1903532	0.646	0.817	GPI|1.354148803	1	186	121	21829	http://www.ebi.ac.uk/QuickGO/GTerm?id=GO:1903532
5	5	mononuclear cell proliferation	GO:0032943	0.648	0.819	FKBP12.6|0.773369444	1	187	121	21829	http://www.ebi.ac.uk/QuickGO/GTerm?id=GO:0032943
7	6,7	Ras protein signal transduction	GO:0007265	0.649	0.82	ARHGDIA|1.261342819;RAB5C|2.549741805	2	397	121	21829	http://www.ebi.ac.uk/QuickGO/GTerm?id=GO:0007265
9	7,8,9	regulation of proteasomal protein catabolic process	GO:0061136	0.65	0.82	Rchy1|0.707606765	1	188	121	21829	http://www.ebi.ac.uk/QuickGO/GTerm?id=GO:0061136
8	7,8	double-strand break repair	GO:0006302	0.65	0.82	UBE2V2|1.250642582	1	188	121	21829	http://www.ebi.ac.uk/QuickGO/GTerm?id=GO:0006302
5	5	peptide metabolic process	GO:0006518	0.651	0.82	EIF3I|1.293629736;EEF1B2|1.322594905;RPL27|1.485323169;DPH5|0.719312178;XPNPEP1|0.544019076	5	995	121	21829	http://www.ebi.ac.uk/QuickGO/GTerm?id=GO:0006518
10	6,9,10	axon guidance	GO:0007411	0.652	0.82	DPYSL2|0.795640031	1	189	121	21829	http://www.ebi.ac.uk/QuickGO/GTerm?id=GO:0007411
5	5	positive regulation of cell projection organization	GO:0031346	0.652	0.82	FKBP12.6|0.773369444	1	189	121	21829	http://www.ebi.ac.uk/QuickGO/GTerm?id=GO:0031346
5	5	limb development	GO:0060173	0.656	0.824	FKBP12.6|0.773369444	1	191	121	21829	http://www.ebi.ac.uk/QuickGO/GTerm?id=GO:0060173
4	4	cellular process involved in reproduction in multicellular organism	GO:0022412	0.656	0.824	HSP70|1.283172572	1	191	121	21829	http://www.ebi.ac.uk/QuickGO/GTerm?id=GO:0022412
6	3,5,6	positive regulation of establishment of protein localization	GO:1904951	0.658	0.824	GPI|1.354148803	1	192	121	21829	http://www.ebi.ac.uk/QuickGO/GTerm?id=GO:1904951
4	4	appendage development	GO:0048736	0.658	0.824	FKBP12.6|0.773369444	1	192	121	21829	http://www.ebi.ac.uk/QuickGO/GTerm?id=GO:0048736
3	3	cell motility	GO:0048870	0.658	0.824	MYPN|1.223593919;HSPB1|1.337774448;SH3KBP1|1.234699811;LAMA4|0.797937472;GLIPR2|0.785712158	5	1003	121	21829	http://www.ebi.ac.uk/QuickGO/GTerm?id=GO:0048870
5	5	organelle fission	GO:0048285	0.659	0.824	RANBP1|1.340088175;HSP70|1.283172572	2	404	121	21829	http://www.ebi.ac.uk/QuickGO/GTerm?id=GO:0048285
3	3	localization of cell	GO:0051674	0.659	0.824	MYPN|1.223593919;HSPB1|1.337774448;SH3KBP1|1.234699811;LAMA4|0.797937472;GLIPR2|0.785712158	5	1004	121	21829	http://www.ebi.ac.uk/QuickGO/GTerm?id=GO:0051674
6	5,6	epithelial cell development	GO:0002064	0.66	0.824	FLNB|0.613099367	1	193	121	21829	http://www.ebi.ac.uk/QuickGO/GTerm?id=GO:0002064
3	3	locomotory behavior	GO:0007626	0.66	0.824	UCH-L1|1.43716929	1	193	121	21829	http://www.ebi.ac.uk/QuickGO/GTerm?id=GO:0007626
6	5,6	morphogenesis of an epithelium	GO:0002009	0.66	0.824	A0A3Q2U769|0.584188784;MTHFD1L|0.749713642	2	405	121	21829	http://www.ebi.ac.uk/QuickGO/GTerm?id=GO:0002009
4	4	single-organism cellular localization	GO:1902580	0.661	0.825	ALB|1.487005807;TIMM13|1.33072494;SAMM50|0.563408826;KPNA3|0.806756534	4	810	121	21829	http://www.ebi.ac.uk/QuickGO/GTerm?id=GO:1902580
4	4	leukocyte proliferation	GO:0070661	0.661	0.825	FKBP12.6|0.773369444	1	194	121	21829	http://www.ebi.ac.uk/QuickGO/GTerm?id=GO:0070661
6	5,6	negative regulation of cellular protein metabolic process	GO:0032269	0.662	0.825	A0A3Q2U6J9|1.340342648;UCH-L1|1.43716929;HSPB1|1.337774448;FKBP12.6|0.773369444	4	811	121	21829	http://www.ebi.ac.uk/QuickGO/GTerm?id=GO:0032269
9	5,8,9	neuron projection guidance	GO:0097485	0.663	0.826	DPYSL2|0.795640031	1	195	121	21829	http://www.ebi.ac.uk/QuickGO/GTerm?id=GO:0097485
5	5	regulation of hydrolase activity	GO:0051336	0.665	0.827	A0A3Q2U6J9|1.340342648;RANBP1|1.340088175;HSP70|1.283172572;A0A3Q2U769|0.584188784;PPP1R2|0.797609752;FKBP12.6|0.773369444	6	1206	121	21829	http://www.ebi.ac.uk/QuickGO/GTerm?id=GO:0051336
7	6,7	anterior/posterior pattern specification	GO:0009952	0.669	0.832	A0A3Q2U769|0.584188784	1	198	121	21829	http://www.ebi.ac.uk/QuickGO/GTerm?id=GO:0009952
8	8	negative regulation of endopeptidase activity	GO:0010951	0.671	0.832	A0A3Q2U6J9|1.340342648	1	199	121	21829	http://www.ebi.ac.uk/QuickGO/GTerm?id=GO:0010951
8	8	sodium ion transport	GO:0006814	0.671	0.832	FXYD6|0.766199089	1	199	121	21829	http://www.ebi.ac.uk/QuickGO/GTerm?id=GO:0006814
4	4	regulation of catabolic process	GO:0009894	0.671	0.832	A0A3Q2UCH4|1.308620615;MYOM1|1.254881107;Rchy1|0.707606765	3	619	121	21829	http://www.ebi.ac.uk/QuickGO/GTerm?id=GO:0009894
7	5,6,7	positive regulation of phosphorus metabolic process	GO:0010562	0.672	0.832	A0A3Q3AZP2|1.434367428;HSP70|1.283172572;CAB39|1.21239245;GLIPR2|0.785712158	4	821	121	21829	http://www.ebi.ac.uk/QuickGO/GTerm?id=GO:0010562
6	6	positive regulation of phosphate metabolic process	GO:0045937	0.672	0.832	A0A3Q3AZP2|1.434367428;HSP70|1.283172572;CAB39|1.21239245;GLIPR2|0.785712158	4	821	121	21829	http://www.ebi.ac.uk/QuickGO/GTerm?id=GO:0045937
9	7,9	regulation of neuron differentiation	GO:0045664	0.674	0.834	FKBP12.6|0.773369444;DPYSL2|0.795640031	2	416	121	21829	http://www.ebi.ac.uk/QuickGO/GTerm?id=GO:0045664
7	4,6,7	positive regulation of secretion	GO:0051047	0.675	0.834	GPI|1.354148803	1	201	121	21829	http://www.ebi.ac.uk/QuickGO/GTerm?id=GO:0051047
8	7,8	regulation of proteolysis involved in cellular protein catabolic process	GO:1903050	0.678	0.838	Rchy1|0.707606765	1	203	121	21829	http://www.ebi.ac.uk/QuickGO/GTerm?id=GO:1903050
10	6,7,8,10	positive regulation of neuron differentiation	GO:0045666	0.678	0.838	FKBP12.6|0.773369444	1	203	121	21829	http://www.ebi.ac.uk/QuickGO/GTerm?id=GO:0045666
3	3	organic substance metabolic process	GO:0071704	0.679	0.838	PBXIP1|1.284159514;IMPA1|1.338855168;DUSP3|1.289465091;ENO1|1.301513562;A0A3Q2U6J9|1.340342648;A0A3Q2UCH4|1.308620615;PTGES3|1.249959146;A0A3Q2UDT6|1.205693283;A0A3Q2UEL1|1.305534201;CAMK2D|1.395725167;A0A3Q3AZP2|1.434367428;UCH-L1|1.43716929;GANC|1.205632423;ACAT1|1.26178047;EIF3I|1.293629736;PSMD6|1.32702021;PRDX6|1.247143535;MOSPD1|1.300070747;AMPD3|1.306784743;GPI|1.354148803;SDHA|1.217654696…	66	12271	121	21829	http://www.ebi.ac.uk/QuickGO/GTerm?id=GO:0071704
5	5	macromolecule catabolic process	GO:0009057	0.681	0.839	UCH-L1|1.43716929;PSMD6|1.32702021;RANBP1|1.340088175;CUL2|0.771088233;Rchy1|0.707606765	5	1030	121	21829	http://www.ebi.ac.uk/QuickGO/GTerm?id=GO:0009057
5	5	respiratory system development	GO:0060541	0.682	0.839	FKBP12.6|0.773369444	1	205	121	21829	http://www.ebi.ac.uk/QuickGO/GTerm?id=GO:0060541
6	6	homophilic cell adhesion via plasma membrane adhesion molecules	GO:0007156	0.682	0.839	GYPC|0.786106154	1	205	121	21829	http://www.ebi.ac.uk/QuickGO/GTerm?id=GO:0007156
2	2	metabolic process	GO:0008152	0.682	0.839	LOC100859645|1.462273521;PBXIP1|1.284159514;DHRS7C|1.334774673;IMPA1|1.338855168;DUSP3|1.289465091;TXNRD3|1.204580616;ENO1|1.301513562;A0A3Q2U6J9|1.340342648;A0A3Q2UCH4|1.308620615;PTGES3|1.249959146;A0A3Q2UDT6|1.205693283;A0A3Q2UEL1|1.305534201;CAMK2D|1.395725167;A0A3Q3AZP2|1.434367428;UCH-L1|1.43716929;GANC|1.205632423;ACAT1|1.26178047;EIF3I|1.293629736;PSMD6|1.32702021;MYOM1|1.254881107;PRDX6|…	77	14240	121	21829	http://www.ebi.ac.uk/QuickGO/GTerm?id=GO:0008152
4	4	endomembrane system organization	GO:0010256	0.683	0.84	RAB5C|2.549741805;A0A3Q2U769|0.584188784	2	423	121	21829	http://www.ebi.ac.uk/QuickGO/GTerm?id=GO:0010256
7	7	negative regulation of peptidase activity	GO:0010466	0.684	0.84	A0A3Q2U6J9|1.340342648	1	206	121	21829	http://www.ebi.ac.uk/QuickGO/GTerm?id=GO:0010466
2	2	locomotion	GO:0040011	0.686	0.842	MYPN|1.223593919;HSPB1|1.337774448;SH3KBP1|1.234699811;LAMA4|0.797937472;DPYSL2|0.795640031;GLIPR2|0.785712158	6	1234	121	21829	http://www.ebi.ac.uk/QuickGO/GTerm?id=GO:0040011
5	4,5	negative regulation of cell death	GO:0060548	0.687	0.842	A0A3Q2U6J9|1.340342648;HSPB1|1.337774448;ALB|1.487005807	3	634	121	21829	http://www.ebi.ac.uk/QuickGO/GTerm?id=GO:0060548
5	5	ribonucleoprotein complex assembly	GO:0022618	0.689	0.844	EIF3I|1.293629736	1	209	121	21829	http://www.ebi.ac.uk/QuickGO/GTerm?id=GO:0022618
8	8	peptidyl-tyrosine dephosphorylation	GO:0035335	0.689	0.844	DUSP3|1.289465091	1	209	121	21829	http://www.ebi.ac.uk/QuickGO/GTerm?id=GO:0035335
4	4	regulation of binding	GO:0051098	0.691	0.845	EDF1|1.274072423	1	210	121	21829	http://www.ebi.ac.uk/QuickGO/GTerm?id=GO:0051098
6	5,6	I-kappaB kinase/NF-kappaB signaling	GO:0007249	0.691	0.845	HSPB1|1.337774448	1	210	121	21829	http://www.ebi.ac.uk/QuickGO/GTerm?id=GO:0007249
3	3	positive regulation of multicellular organismal process	GO:0051240	0.692	0.845	LMOD3|1.522555731;HSPB1|1.337774448;ATP2A1|1.2337889;FKBP12.6|0.773369444;GLIPR2|0.785712158	5	1043	121	21829	http://www.ebi.ac.uk/QuickGO/GTerm?id=GO:0051240
6	5,6	intrinsic apoptotic signaling pathway	GO:0097193	0.692	0.846	HSPB1|1.337774448	1	211	121	21829	http://www.ebi.ac.uk/QuickGO/GTerm?id=GO:0097193
5	3,5	response to other organism	GO:0051707	0.693	0.846	HSPB1|1.337774448;ALB|1.487005807	2	431	121	21829	http://www.ebi.ac.uk/QuickGO/GTerm?id=GO:0051707
3	3	positive regulation of cellular process	GO:0048522	0.694	0.846	A0A3Q2UCH4|1.308620615;A0A3Q3AZP2|1.434367428;LMOD3|1.522555731;PRDX6|1.247143535;MOSPD1|1.300070747;GPI|1.354148803;HSPB1|1.337774448;SMYD1|1.332742776;RANBP1|1.340088175;HSP70|1.283172572;ENSGALG00000027330|1.235499055;CAB39|1.21239245;GMFB|0.703153051;FBLN2|0.537261949;PBEF1|0.760519451;Rchy1|0.707606765;SUB1|0.814720615;FKBP12.6|0.773369444;GLIPR2|0.785712158	19	3729	121	21829	http://www.ebi.ac.uk/QuickGO/GTerm?id=GO:0048522
4	4	response to external biotic stimulus	GO:0043207	0.694	0.846	HSPB1|1.337774448;ALB|1.487005807	2	432	121	21829	http://www.ebi.ac.uk/QuickGO/GTerm?id=GO:0043207
8	7,8	Rho protein signal transduction	GO:0007266	0.696	0.847	ARHGDIA|1.261342819	1	213	121	21829	http://www.ebi.ac.uk/QuickGO/GTerm?id=GO:0007266
4	4	cell division	GO:0051301	0.698	0.849	RANBP1|1.340088175;PPP1CB|0.799006051	2	435	121	21829	http://www.ebi.ac.uk/QuickGO/GTerm?id=GO:0051301
6	5,6	positive regulation of cellular protein metabolic process	GO:0032270	0.699	0.85	A0A3Q3AZP2|1.434367428;HSP70|1.283172572;CAB39|1.21239245;Rchy1|0.707606765;GLIPR2|0.785712158	5	1052	121	21829	http://www.ebi.ac.uk/QuickGO/GTerm?id=GO:0032270
8	5,7,8	regulation of secretion by cell	GO:1903530	0.699	0.85	GPI|1.354148803;FKBP12.6|0.773369444	2	436	121	21829	http://www.ebi.ac.uk/QuickGO/GTerm?id=GO:1903530
6	5,6	skeletal system morphogenesis	GO:0048705	0.701	0.851	MTHFD1L|0.749713642	1	216	121	21829	http://www.ebi.ac.uk/QuickGO/GTerm?id=GO:0048705
5	5	ribonucleoprotein complex subunit organization	GO:0071826	0.702	0.852	EIF3I|1.293629736	1	217	121	21829	http://www.ebi.ac.uk/QuickGO/GTerm?id=GO:0071826
6	6	translation	GO:0006412	0.703	0.852	EIF3I|1.293629736;EEF1B2|1.322594905;RPL27|1.485323169;DPH5|0.719312178	4	855	121	21829	http://www.ebi.ac.uk/QuickGO/GTerm?id=GO:0006412
5	5	negative regulation of protein metabolic process	GO:0051248	0.705	0.855	A0A3Q2U6J9|1.340342648;UCH-L1|1.43716929;HSPB1|1.337774448;FKBP12.6|0.773369444	4	858	121	21829	http://www.ebi.ac.uk/QuickGO/GTerm?id=GO:0051248
6	4,5,6	negative regulation of cellular metabolic process	GO:0031324	0.706	0.855	PBXIP1|1.284159514;A0A3Q2U6J9|1.340342648;UCH-L1|1.43716929;MOSPD1|1.300070747;HSPB1|1.337774448;SMYD1|1.332742776;HSP70|1.283172572;FKBP12.6|0.773369444;ORMDL3|0.402916918	9	1850	121	21829	http://www.ebi.ac.uk/QuickGO/GTerm?id=GO:0031324
7	6,7	regulation of cellular protein catabolic process	GO:1903362	0.707	0.856	Rchy1|0.707606765	1	220	121	21829	http://www.ebi.ac.uk/QuickGO/GTerm?id=GO:1903362
6	5,6	cytosolic transport	GO:0016482	0.71	0.856	VPS29|0.751790268;SAMM50|0.563408826;KPNA3|0.806756534	3	657	121	21829	http://www.ebi.ac.uk/QuickGO/GTerm?id=GO:0016482
4	4	regulation of protein localization	GO:0032880	0.71	0.856	GPI|1.354148803;ARHGDIA|1.261342819;FKBP12.6|0.773369444	3	657	121	21829	http://www.ebi.ac.uk/QuickGO/GTerm?id=GO:0032880
8	7,8	tRNA metabolic process	GO:0006399	0.711	0.856	RTCB|1.284666414	1	222	121	21829	http://www.ebi.ac.uk/QuickGO/GTerm?id=GO:0006399
4	3,4	developmental growth	GO:0048589	0.711	0.856	A0A3Q2U769|0.584188784;DPYSL2|0.795640031	2	446	121	21829	http://www.ebi.ac.uk/QuickGO/GTerm?id=GO:0048589
3	3	taxis	GO:0042330	0.711	0.856	HSPB1|1.337774448;DPYSL2|0.795640031	2	446	121	21829	http://www.ebi.ac.uk/QuickGO/GTerm?id=GO:0042330
4	4	chemotaxis	GO:0006935	0.711	0.856	HSPB1|1.337774448;DPYSL2|0.795640031	2	446	121	21829	http://www.ebi.ac.uk/QuickGO/GTerm?id=GO:0006935
6	4,5,6	negative regulation of signal transduction	GO:0009968	0.711	0.856	UCH-L1|1.43716929;CILP|1.39877359;HSPB1|1.337774448;FKBP12.6|0.773369444	4	865	121	21829	http://www.ebi.ac.uk/QuickGO/GTerm?id=GO:0009968
6	6	protein processing	GO:0016485	0.712	0.857	A0A3Q2U6J9|1.340342648	1	223	121	21829	http://www.ebi.ac.uk/QuickGO/GTerm?id=GO:0016485
6	5,6	small GTPase mediated signal transduction	GO:0007264	0.715	0.858	ARL8B|1.209421094;ARHGDIA|1.261342819;RAB5C|2.549741805	3	662	121	21829	http://www.ebi.ac.uk/QuickGO/GTerm?id=GO:0007264
7	4,6,7	secretion by cell	GO:0032940	0.715	0.858	GPI|1.354148803;PRKCA|0.487532754;FKBP12.6|0.773369444	3	662	121	21829	http://www.ebi.ac.uk/QuickGO/GTerm?id=GO:0032940
8	7,8	protein homooligomerization	GO:0051260	0.716	0.858	LOC100859860|0.744437258	1	225	121	21829	http://www.ebi.ac.uk/QuickGO/GTerm?id=GO:0051260
5	4,5	positive regulation of cytokine production	GO:0001819	0.716	0.858	HSPB1|1.337774448	1	225	121	21829	http://www.ebi.ac.uk/QuickGO/GTerm?id=GO:0001819
6	6	positive regulation of proteolysis	GO:0045862	0.716	0.858	Rchy1|0.707606765	1	225	121	21829	http://www.ebi.ac.uk/QuickGO/GTerm?id=GO:0045862
6	5,6	cell morphogenesis	GO:0000902	0.717	0.859	UCH-L1|1.43716929;SH3KBP1|1.234699811;FLNB|0.613099367;DPYSL2|0.795640031;GLIPR2|0.785712158	5	1075	121	21829	http://www.ebi.ac.uk/QuickGO/GTerm?id=GO:0000902
4	4	symbiosis, encompassing mutualism through parasitism	GO:0044403	0.719	0.86	ALB|1.487005807	1	227	121	21829	http://www.ebi.ac.uk/QuickGO/GTerm?id=GO:0044403
7	7	cation homeostasis	GO:0055080	0.72	0.861	RYR3|1.208753681;FKBP12.6|0.773369444	2	454	121	21829	http://www.ebi.ac.uk/QuickGO/GTerm?id=GO:0055080
7	6,7	peptide biosynthetic process	GO:0043043	0.721	0.861	EIF3I|1.293629736;EEF1B2|1.322594905;RPL27|1.485323169;DPH5|0.719312178	4	876	121	21829	http://www.ebi.ac.uk/QuickGO/GTerm?id=GO:0043043
4	4	blood vessel development	GO:0001568	0.725	0.864	HSPB1|1.337774448;LAMA4|0.797937472	2	458	121	21829	http://www.ebi.ac.uk/QuickGO/GTerm?id=GO:0001568
3	3	response to biotic stimulus	GO:0009607	0.725	0.864	HSPB1|1.337774448;ALB|1.487005807	2	458	121	21829	http://www.ebi.ac.uk/QuickGO/GTerm?id=GO:0009607
11	9,10,11	activation of protein kinase activity	GO:0032147	0.725	0.864	CAB39|1.21239245	1	231	121	21829	http://www.ebi.ac.uk/QuickGO/GTerm?id=GO:0032147
5	5	alcohol metabolic process	GO:0006066	0.725	0.864	IMPA1|1.338855168	1	231	121	21829	http://www.ebi.ac.uk/QuickGO/GTerm?id=GO:0006066
9	9	protein ubiquitination	GO:0016567	0.728	0.866	UBE2V2|1.250642582;CUL2|0.771088233;Rchy1|0.707606765	3	676	121	21829	http://www.ebi.ac.uk/QuickGO/GTerm?id=GO:0016567
4	4	regulation of developmental growth	GO:0048638	0.728	0.866	DPYSL2|0.795640031	1	233	121	21829	http://www.ebi.ac.uk/QuickGO/GTerm?id=GO:0048638
6	4,6	chromatin organization	GO:0006325	0.731	0.869	SMYD1|1.332742776;P08286|0.677683947;HP1BP3|0.72359077	3	679	121	21829	http://www.ebi.ac.uk/QuickGO/GTerm?id=GO:0006325
7	6,7	cell morphogenesis involved in neuron differentiation	GO:0048667	0.731	0.869	UCH-L1|1.43716929;DPYSL2|0.795640031	2	464	121	21829	http://www.ebi.ac.uk/QuickGO/GTerm?id=GO:0048667
6	4,5,6	positive regulation of macromolecule metabolic process	GO:0010604	0.733	0.87	A0A3Q3AZP2|1.434367428;PRDX6|1.247143535;MOSPD1|1.300070747;HSPB1|1.337774448;HSP70|1.283172572;CAB39|1.21239245;A0A3Q2U769|0.584188784;PBEF1|0.760519451;Rchy1|0.707606765;SUB1|0.814720615;GLIPR2|0.785712158	11	2286	121	21829	http://www.ebi.ac.uk/QuickGO/GTerm?id=GO:0010604
5	5	regulation of secretion	GO:0051046	0.734	0.87	GPI|1.354148803;FKBP12.6|0.773369444	2	466	121	21829	http://www.ebi.ac.uk/QuickGO/GTerm?id=GO:0051046
3	3	interspecies interaction between organisms	GO:0044419	0.734	0.87	ALB|1.487005807	1	237	121	21829	http://www.ebi.ac.uk/QuickGO/GTerm?id=GO:0044419
7	7	inorganic ion homeostasis	GO:0098771	0.735	0.87	RYR3|1.208753681;FKBP12.6|0.773369444	2	467	121	21829	http://www.ebi.ac.uk/QuickGO/GTerm?id=GO:0098771
3	2,3	regulation of biological process	GO:0050789	0.735	0.87	PBXIP1|1.284159514;RYR3|1.208753681;TXNRD3|1.204580616;TNNT3|1.527716062;A0A3Q2TTX7|1.32240644;A0A3Q2U6J9|1.340342648;A0A3Q2UCH4|1.308620615;CATSPER2|1.202421769;A0A3Q3ATJ1|1.201501275;A0A3Q3AZP2|1.434367428;UCH-L1|1.43716929;LMOD3|1.522555731;EIF3I|1.293629736;CILP|1.39877359;MYOM1|1.254881107;PRDX6|1.247143535;MOSPD1|1.300070747;GPI|1.354148803;ARL8B|1.209421094;MYPN|1.223593919;ARHGDIA|1.26134…	58	10995	121	21829	http://www.ebi.ac.uk/QuickGO/GTerm?id=GO:0050789
4	4	regulation of response to stress	GO:0080134	0.735	0.87	A0A3Q2UCH4|1.308620615;MYOM1|1.254881107;HSPB1|1.337774448;FKBP12.6|0.773369444	4	894	121	21829	http://www.ebi.ac.uk/QuickGO/GTerm?id=GO:0080134
8	6,7,8	negative regulation of transcription, DNA-templated	GO:0045892	0.736	0.87	PBXIP1|1.284159514;MOSPD1|1.300070747;SMYD1|1.332742776;HSP70|1.283172572	4	895	121	21829	http://www.ebi.ac.uk/QuickGO/GTerm?id=GO:0045892
7	6,7	neuron projection development	GO:0031175	0.737	0.87	UCH-L1|1.43716929;FKBP12.6|0.773369444;DPYSL2|0.795640031	3	686	121	21829	http://www.ebi.ac.uk/QuickGO/GTerm?id=GO:0031175
4	4	lipid metabolic process	GO:0006629	0.737	0.87	IMPA1|1.338855168;A0A3Q3AZP2|1.434367428;ACAT1|1.26178047;PRDX6|1.247143535;ORMDL3|0.402916918	5	1102	121	21829	http://www.ebi.ac.uk/QuickGO/GTerm?id=GO:0006629
5	4,5	regulation of cell division	GO:0051302	0.74	0.873	RANBP1|1.340088175	1	241	121	21829	http://www.ebi.ac.uk/QuickGO/GTerm?id=GO:0051302
7	5,6,7	stem cell development	GO:0048864	0.741	0.874	GLIPR2|0.785712158	1	242	121	21829	http://www.ebi.ac.uk/QuickGO/GTerm?id=GO:0048864
4	4	regulation of multicellular organismal development	GO:2000026	0.742	0.875	LMOD3|1.522555731;HSPB1|1.337774448;LAMA4|0.797937472;FKBP12.6|0.773369444;DPYSL2|0.795640031;GLIPR2|0.785712158	6	1313	121	21829	http://www.ebi.ac.uk/QuickGO/GTerm?id=GO:2000026
5	5	protein maturation	GO:0051604	0.743	0.875	A0A3Q2U6J9|1.340342648	1	243	121	21829	http://www.ebi.ac.uk/QuickGO/GTerm?id=GO:0051604
7	6,7	mRNA metabolic process	GO:0016071	0.743	0.875	PRDX6|1.247143535;SRSF2|0.465409726	2	475	121	21829	http://www.ebi.ac.uk/QuickGO/GTerm?id=GO:0016071
4	4	microtubule-based movement	GO:0007018	0.744	0.875	UCH-L1|1.43716929	1	244	121	21829	http://www.ebi.ac.uk/QuickGO/GTerm?id=GO:0007018
5	5	fatty acid metabolic process	GO:0006631	0.749	0.879	ACAT1|1.26178047	1	247	121	21829	http://www.ebi.ac.uk/QuickGO/GTerm?id=GO:0006631
11	7,8,9,10,11	regulation of MAP kinase activity	GO:0043405	0.75	0.879	UCH-L1|1.43716929	1	248	121	21829	http://www.ebi.ac.uk/QuickGO/GTerm?id=GO:0043405
4	4	cell-cell adhesion	GO:0098609	0.75	0.879	HSPB1|1.337774448;GYPC|0.786106154;MPZ|0.531735444	3	701	121	21829	http://www.ebi.ac.uk/QuickGO/GTerm?id=GO:0098609
7	7	negative regulation of nucleic acid-templated transcription	GO:1903507	0.751	0.879	PBXIP1|1.284159514;MOSPD1|1.300070747;SMYD1|1.332742776;HSP70|1.283172572	4	914	121	21829	http://www.ebi.ac.uk/QuickGO/GTerm?id=GO:1903507
5	4,5	regulation of macromolecule metabolic process	GO:0060255	0.751	0.879	PBXIP1|1.284159514;A0A3Q2U6J9|1.340342648;A0A3Q2UCH4|1.308620615;A0A3Q3AZP2|1.434367428;UCH-L1|1.43716929;EIF3I|1.293629736;PRDX6|1.247143535;MOSPD1|1.300070747;HSPB1|1.337774448;SMYD1|1.332742776;EDF1|1.274072423;HSP70|1.283172572;CAB39|1.21239245;DPH5|0.719312178;A0A3Q2U769|0.584188784;TAF15|0.685582591;SRSF2|0.465409726;PPP1CB|0.799006051;PRKAB2|0.71569607;PBEF1|0.760519451;PPP1R2|0.797609752;…	27	5367	121	21829	http://www.ebi.ac.uk/QuickGO/GTerm?id=GO:0060255
6	5,6	nucleobase-containing compound catabolic process	GO:0034655	0.751	0.879	ENO1|1.301513562	1	249	121	21829	http://www.ebi.ac.uk/QuickGO/GTerm?id=GO:0034655
5	5	vasculature development	GO:0001944	0.751	0.879	HSPB1|1.337774448;LAMA4|0.797937472	2	483	121	21829	http://www.ebi.ac.uk/QuickGO/GTerm?id=GO:0001944
6	4,5,6	positive regulation of cellular metabolic process	GO:0031325	0.753	0.881	A0A3Q2UCH4|1.308620615;A0A3Q3AZP2|1.434367428;PRDX6|1.247143535;MOSPD1|1.300070747;HSPB1|1.337774448;HSP70|1.283172572;CAB39|1.21239245;PBEF1|0.760519451;Rchy1|0.707606765;SUB1|0.814720615;GLIPR2|0.785712158	11	2324	121	21829	http://www.ebi.ac.uk/QuickGO/GTerm?id=GO:0031325
7	5,6,7	regulation of protein transport	GO:0051223	0.756	0.882	GPI|1.354148803;FKBP12.6|0.773369444	2	487	121	21829	http://www.ebi.ac.uk/QuickGO/GTerm?id=GO:0051223
4	3,4	positive regulation of cell adhesion	GO:0045785	0.756	0.882	FBLN2|0.537261949	1	252	121	21829	http://www.ebi.ac.uk/QuickGO/GTerm?id=GO:0045785
6	6	negative regulation of RNA biosynthetic process	GO:1902679	0.757	0.883	PBXIP1|1.284159514;MOSPD1|1.300070747;SMYD1|1.332742776;HSP70|1.283172572	4	922	121	21829	http://www.ebi.ac.uk/QuickGO/GTerm?id=GO:1902679
8	7,8	neuron projection morphogenesis	GO:0048812	0.759	0.885	UCH-L1|1.43716929;DPYSL2|0.795640031	2	490	121	21829	http://www.ebi.ac.uk/QuickGO/GTerm?id=GO:0048812
6	6	spermatogenesis	GO:0007283	0.76	0.885	HSP70|1.283172572	1	255	121	21829	http://www.ebi.ac.uk/QuickGO/GTerm?id=GO:0007283
9	5,6,7,9	positive regulation of neurogenesis	GO:0050769	0.762	0.888	FKBP12.6|0.773369444	1	257	121	21829	http://www.ebi.ac.uk/QuickGO/GTerm?id=GO:0050769
4	3,4	negative regulation of signaling	GO:0023057	0.763	0.888	UCH-L1|1.43716929;CILP|1.39877359;HSPB1|1.337774448;FKBP12.6|0.773369444	4	930	121	21829	http://www.ebi.ac.uk/QuickGO/GTerm?id=GO:0023057
6	5,6	mitotic nuclear division	GO:0007067	0.766	0.891	RANBP1|1.340088175	1	260	121	21829	http://www.ebi.ac.uk/QuickGO/GTerm?id=GO:0007067
4	4	negative regulation of cell communication	GO:0010648	0.767	0.891	UCH-L1|1.43716929;CILP|1.39877359;HSPB1|1.337774448;FKBP12.6|0.773369444	4	935	121	21829	http://www.ebi.ac.uk/QuickGO/GTerm?id=GO:0010648
5	5	anatomical structure homeostasis	GO:0060249	0.768	0.891	HSPB1|1.337774448	1	261	121	21829	http://www.ebi.ac.uk/QuickGO/GTerm?id=GO:0060249
5	5	response to steroid hormone	GO:0048545	0.77	0.893	HSP70|1.283172572	1	263	121	21829	http://www.ebi.ac.uk/QuickGO/GTerm?id=GO:0048545
8	8	protein modification by small protein conjugation	GO:0032446	0.77	0.893	UBE2V2|1.250642582;CUL2|0.771088233;Rchy1|0.707606765	3	725	121	21829	http://www.ebi.ac.uk/QuickGO/GTerm?id=GO:0032446
5	5	male gamete generation	GO:0048232	0.772	0.894	HSP70|1.283172572	1	264	121	21829	http://www.ebi.ac.uk/QuickGO/GTerm?id=GO:0048232
5	5	negative regulation of cellular biosynthetic process	GO:0031327	0.774	0.896	PBXIP1|1.284159514;MOSPD1|1.300070747;SMYD1|1.332742776;HSP70|1.283172572;ORMDL3|0.402916918	5	1155	121	21829	http://www.ebi.ac.uk/QuickGO/GTerm?id=GO:0031327
7	5,6,7	negative regulation of RNA metabolic process	GO:0051253	0.777	0.899	PBXIP1|1.284159514;MOSPD1|1.300070747;SMYD1|1.332742776;HSP70|1.283172572	4	950	121	21829	http://www.ebi.ac.uk/QuickGO/GTerm?id=GO:0051253
6	5,6	lipid transport	GO:0006869	0.778	0.899	A0A3Q3AZP2|1.434367428	1	269	121	21829	http://www.ebi.ac.uk/QuickGO/GTerm?id=GO:0006869
4	4	negative regulation of biosynthetic process	GO:0009890	0.78	0.899	PBXIP1|1.284159514;MOSPD1|1.300070747;SMYD1|1.332742776;HSP70|1.283172572;ORMDL3|0.402916918	5	1165	121	21829	http://www.ebi.ac.uk/QuickGO/GTerm?id=GO:0009890
4	4	regulation of cell growth	GO:0001558	0.78	0.899	DPYSL2|0.795640031	1	271	121	21829	http://www.ebi.ac.uk/QuickGO/GTerm?id=GO:0001558
2	2	positive regulation of biological process	GO:0048518	0.78	0.899	A0A3Q2UCH4|1.308620615;A0A3Q3AZP2|1.434367428;LMOD3|1.522555731;PRDX6|1.247143535;MOSPD1|1.300070747;GPI|1.354148803;HSPB1|1.337774448;SMYD1|1.332742776;ATP2A1|1.2337889;RANBP1|1.340088175;HSP70|1.283172572;ENSGALG00000027330|1.235499055;CAB39|1.21239245;GMFB|0.703153051;A0A3Q2U769|0.584188784;FBLN2|0.537261949;PBEF1|0.760519451;Rchy1|0.707606765;SUB1|0.814720615;FKBP12.6|0.773369444;GLIPR2|0.785…	21	4315	121	21829	http://www.ebi.ac.uk/QuickGO/GTerm?id=GO:0048518
6	6	ion homeostasis	GO:0050801	0.781	0.899	RYR3|1.208753681;FKBP12.6|0.773369444	2	513	121	21829	http://www.ebi.ac.uk/QuickGO/GTerm?id=GO:0050801
8	6,8	regulation of neurogenesis	GO:0050767	0.781	0.899	FKBP12.6|0.773369444;DPYSL2|0.795640031	2	513	121	21829	http://www.ebi.ac.uk/QuickGO/GTerm?id=GO:0050767
3	3	regulation of developmental process	GO:0050793	0.781	0.899	LMOD3|1.522555731;HSPB1|1.337774448;SMYD1|1.332742776;SH3KBP1|1.234699811;LAMA4|0.797937472;FKBP12.6|0.773369444;DPYSL2|0.795640031;GLIPR2|0.785712158	8	1783	121	21829	http://www.ebi.ac.uk/QuickGO/GTerm?id=GO:0050793
6	5,6	secretion	GO:0046903	0.782	0.899	GPI|1.354148803;PRKCA|0.487532754;FKBP12.6|0.773369444	3	739	121	21829	http://www.ebi.ac.uk/QuickGO/GTerm?id=GO:0046903
5	5	response to organic cyclic compound	GO:0014070	0.782	0.899	HSP70|1.283172572;FKBP12.6|0.773369444	2	514	121	21829	http://www.ebi.ac.uk/QuickGO/GTerm?id=GO:0014070
7	4,6,7	positive regulation of protein transport	GO:0051222	0.783	0.9	GPI|1.354148803	1	273	121	21829	http://www.ebi.ac.uk/QuickGO/GTerm?id=GO:0051222
6	6	negative regulation of proteolysis	GO:0045861	0.785	0.902	A0A3Q2U6J9|1.340342648	1	275	121	21829	http://www.ebi.ac.uk/QuickGO/GTerm?id=GO:0045861
5	5	cellular nitrogen compound catabolic process	GO:0044270	0.792	0.908	ENO1|1.301513562	1	281	121	21829	http://www.ebi.ac.uk/QuickGO/GTerm?id=GO:0044270
4	4	chromosome segregation	GO:0007059	0.792	0.908	ARL8B|1.209421094	1	281	121	21829	http://www.ebi.ac.uk/QuickGO/GTerm?id=GO:0007059
7	6,7	transmembrane receptor protein tyrosine kinase signaling pathway	GO:0007169	0.792	0.908	CILP|1.39877359;HSPB1|1.337774448	2	526	121	21829	http://www.ebi.ac.uk/QuickGO/GTerm?id=GO:0007169
3	3	regulation of multicellular organismal process	GO:0051239	0.793	0.908	TNNT3|1.527716062;A0A3Q3ATJ1|1.201501275;LMOD3|1.522555731;HSPB1|1.337774448;ATP2A1|1.2337889;LAMA4|0.797937472;FKBP12.6|0.773369444;DPYSL2|0.795640031;GLIPR2|0.785712158	9	2007	121	21829	http://www.ebi.ac.uk/QuickGO/GTerm?id=GO:0051239
6	5,6	regulation of apoptotic signaling pathway	GO:2001233	0.794	0.908	HSPB1|1.337774448	1	282	121	21829	http://www.ebi.ac.uk/QuickGO/GTerm?id=GO:2001233
4	4	membrane organization	GO:0061024	0.794	0.908	TIMM13|1.33072494;SAMM50|0.563408826;MBP|0.690656099	3	755	121	21829	http://www.ebi.ac.uk/QuickGO/GTerm?id=GO:0061024
5	5	heterocycle catabolic process	GO:0046700	0.795	0.908	ENO1|1.301513562	1	283	121	21829	http://www.ebi.ac.uk/QuickGO/GTerm?id=GO:0046700
6	5,6	regulation of establishment of protein localization	GO:0070201	0.795	0.908	GPI|1.354148803;FKBP12.6|0.773369444	2	529	121	21829	http://www.ebi.ac.uk/QuickGO/GTerm?id=GO:0070201
5	5	regulation of response to wounding	GO:1903034	0.799	0.912	FKBP12.6|0.773369444	1	287	121	21829	http://www.ebi.ac.uk/QuickGO/GTerm?id=GO:1903034
5	5	aromatic compound catabolic process	GO:0019439	0.802	0.914	ENO1|1.301513562	1	289	121	21829	http://www.ebi.ac.uk/QuickGO/GTerm?id=GO:0019439
3	3	regulation of immune system process	GO:0002682	0.802	0.915	A0A3Q2UCH4|1.308620615;GPI|1.354148803;ogchi|0.611712077	3	767	121	21829	http://www.ebi.ac.uk/QuickGO/GTerm?id=GO:0002682
4	4	regulation of cell differentiation	GO:0045595	0.804	0.916	LMOD3|1.522555731;SMYD1|1.332742776;FKBP12.6|0.773369444;DPYSL2|0.795640031;GLIPR2|0.785712158	5	1204	121	21829	http://www.ebi.ac.uk/QuickGO/GTerm?id=GO:0045595
5	5	T cell activation	GO:0042110	0.805	0.916	FKBP12.6|0.773369444	1	292	121	21829	http://www.ebi.ac.uk/QuickGO/GTerm?id=GO:0042110
6	5,6	negative regulation of gene expression	GO:0010629	0.806	0.917	PBXIP1|1.284159514;A0A3Q2U6J9|1.340342648;MOSPD1|1.300070747;SMYD1|1.332742776;HSP70|1.283172572	5	1208	121	21829	http://www.ebi.ac.uk/QuickGO/GTerm?id=GO:0010629
7	7	regulation of endopeptidase activity	GO:0052548	0.807	0.917	A0A3Q2U6J9|1.340342648	1	294	121	21829	http://www.ebi.ac.uk/QuickGO/GTerm?id=GO:0052548
3	3	negative regulation of transport	GO:0051051	0.808	0.918	FKBP12.6|0.773369444	1	295	121	21829	http://www.ebi.ac.uk/QuickGO/GTerm?id=GO:0051051
4	4	lipid localization	GO:0010876	0.81	0.92	A0A3Q3AZP2|1.434367428	1	297	121	21829	http://www.ebi.ac.uk/QuickGO/GTerm?id=GO:0010876
3	3	negative regulation of metabolic process	GO:0009892	0.814	0.923	PBXIP1|1.284159514;A0A3Q2U6J9|1.340342648;UCH-L1|1.43716929;MOSPD1|1.300070747;HSPB1|1.337774448;SMYD1|1.332742776;HSP70|1.283172572;FKBP12.6|0.773369444;ORMDL3|0.402916918	9	2053	121	21829	http://www.ebi.ac.uk/QuickGO/GTerm?id=GO:0009892
5	5	organic cyclic compound catabolic process	GO:1901361	0.82	0.929	ENO1|1.301513562	1	306	121	21829	http://www.ebi.ac.uk/QuickGO/GTerm?id=GO:1901361
4	4	animal organ morphogenesis	GO:0009887	0.82	0.929	A0A3Q2U769|0.584188784;MTHFD1L|0.749713642;FBLN2|0.537261949	3	792	121	21829	http://www.ebi.ac.uk/QuickGO/GTerm?id=GO:0009887
8	7,8	ncRNA processing	GO:0034470	0.821	0.929	RTCB|1.284666414	1	307	121	21829	http://www.ebi.ac.uk/QuickGO/GTerm?id=GO:0034470
6	4,5,6	negative regulation of macromolecule metabolic process	GO:0010605	0.822	0.93	PBXIP1|1.284159514;A0A3Q2U6J9|1.340342648;UCH-L1|1.43716929;MOSPD1|1.300070747;HSPB1|1.337774448;SMYD1|1.332742776;HSP70|1.283172572;FKBP12.6|0.773369444	8	1866	121	21829	http://www.ebi.ac.uk/QuickGO/GTerm?id=GO:0010605
5	5	regulation of protein catabolic process	GO:0042176	0.827	0.934	Rchy1|0.707606765	1	313	121	21829	http://www.ebi.ac.uk/QuickGO/GTerm?id=GO:0042176
7	6,7	RNA processing	GO:0006396	0.828	0.934	PRDX6|1.247143535;RTCB|1.284666414;SRSF2|0.465409726	3	804	121	21829	http://www.ebi.ac.uk/QuickGO/GTerm?id=GO:0006396
3	3	process utilizing autophagic mechanism	GO:0061919	0.828	0.934	A0A3Q2UCH4|1.308620615	1	314	121	21829	http://www.ebi.ac.uk/QuickGO/GTerm?id=GO:0061919
6	5,6	regionalization	GO:0003002	0.828	0.934	A0A3Q2U769|0.584188784	1	314	121	21829	http://www.ebi.ac.uk/QuickGO/GTerm?id=GO:0003002
7	5,6,7	cytokine-mediated signaling pathway	GO:0019221	0.829	0.934	A0A3Q2UCH4|1.308620615	1	315	121	21829	http://www.ebi.ac.uk/QuickGO/GTerm?id=GO:0019221
6	6	regulation of peptidase activity	GO:0052547	0.83	0.934	A0A3Q2U6J9|1.340342648	1	316	121	21829	http://www.ebi.ac.uk/QuickGO/GTerm?id=GO:0052547
7	6,7	protein oligomerization	GO:0051259	0.83	0.934	LOC100859860|0.744437258	1	316	121	21829	http://www.ebi.ac.uk/QuickGO/GTerm?id=GO:0051259
4	4	cellular nitrogen compound metabolic process	GO:0034641	0.831	0.934	PBXIP1|1.284159514;ENO1|1.301513562;A0A3Q2UEL1|1.305534201;ACAT1|1.26178047;EIF3I|1.293629736;PRDX6|1.247143535;MOSPD1|1.300070747;AMPD3|1.306784743;GPI|1.354148803;ATP5F1|1.373436785;PGK1|1.22553449;ADSSL1|1.469655536;EEF1B2|1.322594905;RTCB|1.284666414;SMYD1|1.332742776;ENO3|1.243593921;RPL27|1.485323169;UBE2V2|1.250642582;OARD1|1.518785107;EDF1|1.274072423;HSP70|1.283172572;COX7C|1.254685321;A…	33	6740	121	21829	http://www.ebi.ac.uk/QuickGO/GTerm?id=GO:0034641
4	4	positive regulation of nervous system development	GO:0051962	0.831	0.934	FKBP12.6|0.773369444	1	318	121	21829	http://www.ebi.ac.uk/QuickGO/GTerm?id=GO:0051962
4	4	mitotic cell cycle process	GO:1903047	0.832	0.934	RANBP1|1.340088175;HSP70|1.283172572	2	575	121	21829	http://www.ebi.ac.uk/QuickGO/GTerm?id=GO:1903047
3	3	positive regulation of transport	GO:0051050	0.832	0.934	GPI|1.354148803;HSP70|1.283172572	2	576	121	21829	http://www.ebi.ac.uk/QuickGO/GTerm?id=GO:0051050
4	4	neurological system process	GO:0050877	0.833	0.934	UCH-L1|1.43716929;ENSGALG00000027330|1.235499055;FKBP12.6|0.773369444	3	812	121	21829	http://www.ebi.ac.uk/QuickGO/GTerm?id=GO:0050877
5	5	chromosome organization	GO:0051276	0.833	0.934	SMYD1|1.332742776;HSP70|1.283172572;P08286|0.677683947;HP1BP3|0.72359077	4	1038	121	21829	http://www.ebi.ac.uk/QuickGO/GTerm?id=GO:0051276
5	5	regulation of defense response	GO:0031347	0.834	0.935	A0A3Q2UCH4|1.308620615	1	321	121	21829	http://www.ebi.ac.uk/QuickGO/GTerm?id=GO:0031347
7	6,7	regulation of apoptotic process	GO:0042981	0.835	0.935	A0A3Q2U6J9|1.340342648;A0A3Q3AZP2|1.434367428;HSPB1|1.337774448;ALB|1.487005807	4	1041	121	21829	http://www.ebi.ac.uk/QuickGO/GTerm?id=GO:0042981
5	4,5	regulation of cellular metabolic process	GO:0031323	0.835	0.935	PBXIP1|1.284159514;A0A3Q2U6J9|1.340342648;A0A3Q2UCH4|1.308620615;A0A3Q3AZP2|1.434367428;UCH-L1|1.43716929;EIF3I|1.293629736;MYOM1|1.254881107;PRDX6|1.247143535;MOSPD1|1.300070747;HSPB1|1.337774448;SMYD1|1.332742776;EDF1|1.274072423;HSP70|1.283172572;CAB39|1.21239245;DPH5|0.719312178;TAF15|0.685582591;SRSF2|0.465409726;PRKAB2|0.71569607;PBEF1|0.760519451;PPP1R2|0.797609752;Rchy1|0.707606765;SUB1|0…	26	5435	121	21829	http://www.ebi.ac.uk/QuickGO/GTerm?id=GO:0031323
6	6	stem cell differentiation	GO:0048863	0.837	0.935	GLIPR2|0.785712158	1	324	121	21829	http://www.ebi.ac.uk/QuickGO/GTerm?id=GO:0048863
6	5,6	homotypic cell-cell adhesion	GO:0034109	0.837	0.935	HSPB1|1.337774448	1	324	121	21829	http://www.ebi.ac.uk/QuickGO/GTerm?id=GO:0034109
4	4	response to organic substance	GO:0010033	0.837	0.935	A0A3Q2TTX7|1.32240644;A0A3Q2UCH4|1.308620615;A0A3Q3ATJ1|1.201501275;HSPB1|1.337774448;ALB|1.487005807;HSP70|1.283172572;ERP44|0.745186445;FKBP12.6|0.773369444	8	1901	121	21829	http://www.ebi.ac.uk/QuickGO/GTerm?id=GO:0010033
3	3	response to external stimulus	GO:0009605	0.837	0.935	MYOM1|1.254881107;HSPB1|1.337774448;ALB|1.487005807;PPP1CB|0.799006051;FKBP12.6|0.773369444;DPYSL2|0.795640031	6	1481	121	21829	http://www.ebi.ac.uk/QuickGO/GTerm?id=GO:0009605
6	6	regulation of proteolysis	GO:0030162	0.84	0.937	A0A3Q2U6J9|1.340342648;Rchy1|0.707606765	2	586	121	21829	http://www.ebi.ac.uk/QuickGO/GTerm?id=GO:0030162
6	5,6	regulation of programmed cell death	GO:0043067	0.841	0.937	A0A3Q2U6J9|1.340342648;A0A3Q3AZP2|1.434367428;HSPB1|1.337774448;ALB|1.487005807	4	1052	121	21829	http://www.ebi.ac.uk/QuickGO/GTerm?id=GO:0043067
6	5,6	negative regulation of nucleobase-containing compound metabolic process	GO:0045934	0.842	0.937	PBXIP1|1.284159514;MOSPD1|1.300070747;SMYD1|1.332742776;HSP70|1.283172572	4	1055	121	21829	http://www.ebi.ac.uk/QuickGO/GTerm?id=GO:0045934
6	6	negative regulation of cellular macromolecule biosynthetic process	GO:2000113	0.842	0.937	PBXIP1|1.284159514;MOSPD1|1.300070747;SMYD1|1.332742776;HSP70|1.283172572	4	1055	121	21829	http://www.ebi.ac.uk/QuickGO/GTerm?id=GO:2000113
3	3	negative regulation of response to stimulus	GO:0048585	0.843	0.937	UCH-L1|1.43716929;CILP|1.39877359;HSPB1|1.337774448;FKBP12.6|0.773369444	4	1056	121	21829	http://www.ebi.ac.uk/QuickGO/GTerm?id=GO:0048585
2	2	negative regulation of biological process	GO:0048519	0.843	0.937	PBXIP1|1.284159514;RYR3|1.208753681;A0A3Q2U6J9|1.340342648;UCH-L1|1.43716929;LMOD3|1.522555731;CILP|1.39877359;MOSPD1|1.300070747;HSPB1|1.337774448;SMYD1|1.332742776;ATP2A1|1.2337889;ALB|1.487005807;CAPZA2|1.308764545;HSP70|1.283172572;GMFB|0.703153051;A0A3Q2U769|0.584188784;FKBP12.6|0.773369444;ORMDL3|0.402916918	17	3726	121	21829	http://www.ebi.ac.uk/QuickGO/GTerm?id=GO:0048519
4	4	angiogenesis	GO:0001525	0.846	0.94	HSPB1|1.337774448	1	334	121	21829	http://www.ebi.ac.uk/QuickGO/GTerm?id=GO:0001525
4	4	regulation of primary metabolic process	GO:0080090	0.846	0.94	PBXIP1|1.284159514;A0A3Q2U6J9|1.340342648;A0A3Q2UCH4|1.308620615;A0A3Q3AZP2|1.434367428;UCH-L1|1.43716929;EIF3I|1.293629736;PRDX6|1.247143535;MOSPD1|1.300070747;HSPB1|1.337774448;SMYD1|1.332742776;EDF1|1.274072423;HSP70|1.283172572;CAB39|1.21239245;DPH5|0.719312178;TAF15|0.685582591;SRSF2|0.465409726;PRKAB2|0.71569607;PBEF1|0.760519451;PPP1R2|0.797609752;Rchy1|0.707606765;SUB1|0.814720615;HP1BP3|…	25	5284	121	21829	http://www.ebi.ac.uk/QuickGO/GTerm?id=GO:0080090
6	5,6	neuron development	GO:0048666	0.847	0.94	UCH-L1|1.43716929;FKBP12.6|0.773369444;DPYSL2|0.795640031	3	836	121	21829	http://www.ebi.ac.uk/QuickGO/GTerm?id=GO:0048666
4	4	cell-cell signaling	GO:0007267	0.848	0.941	A0A3Q3ATJ1|1.201501275;ENSGALG00000027330|1.235499055;PRKCA|0.487532754;FKBP12.6|0.773369444	4	1067	121	21829	http://www.ebi.ac.uk/QuickGO/GTerm?id=GO:0007267
5	5	regulation of nervous system development	GO:0051960	0.849	0.941	FKBP12.6|0.773369444;DPYSL2|0.795640031	2	600	121	21829	http://www.ebi.ac.uk/QuickGO/GTerm?id=GO:0051960
5	4,5	regulation of vesicle-mediated transport	GO:0060627	0.851	0.943	RAB5C|2.549741805	1	340	121	21829	http://www.ebi.ac.uk/QuickGO/GTerm?id=GO:0060627
5	5	cell projection morphogenesis	GO:0048858	0.852	0.943	UCH-L1|1.43716929;DPYSL2|0.795640031	2	605	121	21829	http://www.ebi.ac.uk/QuickGO/GTerm?id=GO:0048858
6	6	trans-synaptic signaling	GO:0099537	0.854	0.944	ENSGALG00000027330|1.235499055	1	344	121	21829	http://www.ebi.ac.uk/QuickGO/GTerm?id=GO:0099537
7	7	anterograde trans-synaptic signaling	GO:0098916	0.854	0.944	ENSGALG00000027330|1.235499055	1	344	121	21829	http://www.ebi.ac.uk/QuickGO/GTerm?id=GO:0098916
3	3	immune effector process	GO:0002252	0.856	0.946	GPI|1.354148803	1	346	121	21829	http://www.ebi.ac.uk/QuickGO/GTerm?id=GO:0002252
5	4,5	innate immune response	GO:0045087	0.858	0.946	A0A3Q2UCH4|1.308620615	1	348	121	21829	http://www.ebi.ac.uk/QuickGO/GTerm?id=GO:0045087
3	3	positive regulation of metabolic process	GO:0009893	0.858	0.946	A0A3Q2UCH4|1.308620615;A0A3Q3AZP2|1.434367428;PRDX6|1.247143535;MOSPD1|1.300070747;HSPB1|1.337774448;HSP70|1.283172572;CAB39|1.21239245;A0A3Q2U769|0.584188784;PBEF1|0.760519451;Rchy1|0.707606765;SUB1|0.814720615;GLIPR2|0.785712158	12	2777	121	21829	http://www.ebi.ac.uk/QuickGO/GTerm?id=GO:0009893
4	3,4	cell growth	GO:0016049	0.859	0.947	DPYSL2|0.795640031	1	350	121	21829	http://www.ebi.ac.uk/QuickGO/GTerm?id=GO:0016049
4	4	organic hydroxy compound metabolic process	GO:1901615	0.859	0.947	IMPA1|1.338855168	1	350	121	21829	http://www.ebi.ac.uk/QuickGO/GTerm?id=GO:1901615
5	5	synaptic signaling	GO:0099536	0.861	0.948	ENSGALG00000027330|1.235499055	1	352	121	21829	http://www.ebi.ac.uk/QuickGO/GTerm?id=GO:0099536
6	5,6	negative regulation of macromolecule biosynthetic process	GO:0010558	0.862	0.948	PBXIP1|1.284159514;MOSPD1|1.300070747;SMYD1|1.332742776;HSP70|1.283172572	4	1094	121	21829	http://www.ebi.ac.uk/QuickGO/GTerm?id=GO:0010558
6	5,6	cell part morphogenesis	GO:0032990	0.862	0.948	UCH-L1|1.43716929;DPYSL2|0.795640031	2	621	121	21829	http://www.ebi.ac.uk/QuickGO/GTerm?id=GO:0032990
4	3,4	regulation of metabolic process	GO:0019222	0.864	0.949	PBXIP1|1.284159514;A0A3Q2U6J9|1.340342648;A0A3Q2UCH4|1.308620615;A0A3Q3AZP2|1.434367428;UCH-L1|1.43716929;EIF3I|1.293629736;MYOM1|1.254881107;PRDX6|1.247143535;MOSPD1|1.300070747;ARHGDIA|1.261342819;HSPB1|1.337774448;SMYD1|1.332742776;EDF1|1.274072423;HSP70|1.283172572;CAB39|1.21239245;DPH5|0.719312178;A0A3Q2U769|0.584188784;TAF15|0.685582591;SRSF2|0.465409726;PPP1CB|0.799006051;PRKAB2|0.71569607…	29	6114	121	21829	http://www.ebi.ac.uk/QuickGO/GTerm?id=GO:0019222
6	5,6	regulation of intracellular signal transduction	GO:1902531	0.864	0.949	A0A3Q3AZP2|1.434367428;UCH-L1|1.43716929;HSPB1|1.337774448;FKBP12.6|0.773369444;GLIPR2|0.785712158	5	1323	121	21829	http://www.ebi.ac.uk/QuickGO/GTerm?id=GO:1902531
4	4	gamete generation	GO:0007276	0.867	0.951	HSP70|1.283172572	1	360	121	21829	http://www.ebi.ac.uk/QuickGO/GTerm?id=GO:0007276
5	4,5	regulation of cytokine production	GO:0001817	0.868	0.951	HSPB1|1.337774448	1	361	121	21829	http://www.ebi.ac.uk/QuickGO/GTerm?id=GO:0001817
5	4,5	intracellular signal transduction	GO:0035556	0.868	0.951	A0A3Q3AZP2|1.434367428;UCH-L1|1.43716929;ARL8B|1.209421094;ARHGDIA|1.261342819;HSPB1|1.337774448;RAB5C|2.549741805;CAB39|1.21239245;PRKCA|0.487532754;FKBP12.6|0.773369444;GLIPR2|0.785712158	10	2398	121	21829	http://www.ebi.ac.uk/QuickGO/GTerm?id=GO:0035556
4	4	nucleobase-containing compound metabolic process	GO:0006139	0.869	0.952	PBXIP1|1.284159514;ENO1|1.301513562;A0A3Q2UEL1|1.305534201;ACAT1|1.26178047;PRDX6|1.247143535;MOSPD1|1.300070747;AMPD3|1.306784743;GPI|1.354148803;ATP5F1|1.373436785;PGK1|1.22553449;ADSSL1|1.469655536;RTCB|1.284666414;SMYD1|1.332742776;ENO3|1.243593921;UBE2V2|1.250642582;OARD1|1.518785107;EDF1|1.274072423;HSP70|1.283172572;COX7C|1.254685321;ALDOC|1.365001997;TAF15|0.685582591;PANK4|0.649364304;MT…	27	5755	121	21829	http://www.ebi.ac.uk/QuickGO/GTerm?id=GO:0006139
7	6,7	organic anion transport	GO:0015711	0.871	0.954	A0A3Q3AZP2|1.434367428	1	366	121	21829	http://www.ebi.ac.uk/QuickGO/GTerm?id=GO:0015711
2	2	biological regulation	GO:0065007	0.872	0.954	PBXIP1|1.284159514;RYR3|1.208753681;TXNRD3|1.204580616;TNNT3|1.527716062;A0A3Q2TTX7|1.32240644;A0A3Q2U6J9|1.340342648;A0A3Q2UCH4|1.308620615;CATSPER2|1.202421769;A0A3Q3ATJ1|1.201501275;A0A3Q3AZP2|1.434367428;UCH-L1|1.43716929;LMOD3|1.522555731;EIF3I|1.293629736;CILP|1.39877359;MYOM1|1.254881107;PRDX6|1.247143535;MOSPD1|1.300070747;AMPD3|1.306784743;GPI|1.354148803;ARL8B|1.209421094;MYPN|1.2235939…	59	11677	121	21829	http://www.ebi.ac.uk/QuickGO/GTerm?id=GO:0065007
5	4,5	regulation of cell death	GO:0010941	0.873	0.954	A0A3Q2U6J9|1.340342648;A0A3Q3AZP2|1.434367428;HSPB1|1.337774448;ALB|1.487005807	4	1118	121	21829	http://www.ebi.ac.uk/QuickGO/GTerm?id=GO:0010941
3	3	negative regulation of cellular process	GO:0048523	0.875	0.956	PBXIP1|1.284159514;RYR3|1.208753681;A0A3Q2U6J9|1.340342648;UCH-L1|1.43716929;LMOD3|1.522555731;CILP|1.39877359;MOSPD1|1.300070747;HSPB1|1.337774448;SMYD1|1.332742776;ALB|1.487005807;CAPZA2|1.308764545;HSP70|1.283172572;GMFB|0.703153051;FKBP12.6|0.773369444;ORMDL3|0.402916918	15	3438	121	21829	http://www.ebi.ac.uk/QuickGO/GTerm?id=GO:0048523
7	7	peptidyl-amino acid modification	GO:0018193	0.876	0.956	CAB39|1.21239245;DPH5|0.719312178;PRKCA|0.487532754;FKBP12.6|0.773369444	4	1125	121	21829	http://www.ebi.ac.uk/QuickGO/GTerm?id=GO:0018193
3	3	developmental process involved in reproduction	GO:0003006	0.876	0.956	HSP70|1.283172572	1	373	121	21829	http://www.ebi.ac.uk/QuickGO/GTerm?id=GO:0003006
9	7,8,9	positive regulation of transcription from RNA polymerase II promoter	GO:0045944	0.88	0.96	MOSPD1|1.300070747;PBEF1|0.760519451;SUB1|0.814720615	3	900	121	21829	http://www.ebi.ac.uk/QuickGO/GTerm?id=GO:0045944
3	3	methylation	GO:0032259	0.883	0.962	DPH5|0.719312178	1	383	121	21829	http://www.ebi.ac.uk/QuickGO/GTerm?id=GO:0032259
7	5,6,7	positive regulation of intracellular signal transduction	GO:1902533	0.884	0.963	A0A3Q3AZP2|1.434367428;GLIPR2|0.785712158	2	660	121	21829	http://www.ebi.ac.uk/QuickGO/GTerm?id=GO:1902533
4	4	regulation of cell communication	GO:0010646	0.888	0.966	A0A3Q2UCH4|1.308620615;A0A3Q3AZP2|1.434367428;UCH-L1|1.43716929;CILP|1.39877359;MYOM1|1.254881107;HSPB1|1.337774448;ENSGALG00000027330|1.235499055;PPP1R2|0.797609752;FKBP12.6|0.773369444;GLIPR2|0.785712158	10	2462	121	21829	http://www.ebi.ac.uk/QuickGO/GTerm?id=GO:0010646
5	4,5	pattern specification process	GO:0007389	0.89	0.968	A0A3Q2U769|0.584188784	1	394	121	21829	http://www.ebi.ac.uk/QuickGO/GTerm?id=GO:0007389
6	6	regulation of GTPase activity	GO:0043087	0.893	0.971	RANBP1|1.340088175;A0A3Q2U769|0.584188784	2	678	121	21829	http://www.ebi.ac.uk/QuickGO/GTerm?id=GO:0043087
4	4	ribonucleoprotein complex biogenesis	GO:0022613	0.895	0.971	EIF3I|1.293629736	1	401	121	21829	http://www.ebi.ac.uk/QuickGO/GTerm?id=GO:0022613
5	4,5	single-organism membrane organization	GO:0044802	0.897	0.973	TIMM13|1.33072494;SAMM50|0.563408826	2	685	121	21829	http://www.ebi.ac.uk/QuickGO/GTerm?id=GO:0044802
4	4	blood vessel morphogenesis	GO:0048514	0.899	0.974	HSPB1|1.337774448	1	408	121	21829	http://www.ebi.ac.uk/QuickGO/GTerm?id=GO:0048514
5	5	glycoprotein metabolic process	GO:0009100	0.9	0.974	ERP44|0.745186445	1	410	121	21829	http://www.ebi.ac.uk/QuickGO/GTerm?id=GO:0009100
6	5,6	regulation of mitotic cell cycle	GO:0007346	0.901	0.974	RANBP1|1.340088175	1	412	121	21829	http://www.ebi.ac.uk/QuickGO/GTerm?id=GO:0007346
7	5,7	chromatin modification	GO:0016568	0.901	0.974	SMYD1|1.332742776	1	412	121	21829	http://www.ebi.ac.uk/QuickGO/GTerm?id=GO:0016568
4	4	cytokine production	GO:0001816	0.902	0.974	HSPB1|1.337774448	1	414	121	21829	http://www.ebi.ac.uk/QuickGO/GTerm?id=GO:0001816
4	4	lymphocyte activation	GO:0046649	0.903	0.974	FKBP12.6|0.773369444	1	415	121	21829	http://www.ebi.ac.uk/QuickGO/GTerm?id=GO:0046649
4	4	heterocycle metabolic process	GO:0046483	0.903	0.974	PBXIP1|1.284159514;ENO1|1.301513562;A0A3Q2UEL1|1.305534201;ACAT1|1.26178047;PRDX6|1.247143535;MOSPD1|1.300070747;AMPD3|1.306784743;GPI|1.354148803;ATP5F1|1.373436785;PGK1|1.22553449;ADSSL1|1.469655536;RTCB|1.284666414;SMYD1|1.332742776;ENO3|1.243593921;UBE2V2|1.250642582;OARD1|1.518785107;EDF1|1.274072423;HSP70|1.283172572;COX7C|1.254685321;ALDOC|1.365001997;TAF15|0.685582591;PANK4|0.649364304;MT…	27	5914	121	21829	http://www.ebi.ac.uk/QuickGO/GTerm?id=GO:0046483
4	4	cell projection organization	GO:0030030	0.903	0.974	UCH-L1|1.43716929;FKBP12.6|0.773369444;DPYSL2|0.795640031	3	954	121	21829	http://www.ebi.ac.uk/QuickGO/GTerm?id=GO:0030030
6	6	cellular response to cytokine stimulus	GO:0071345	0.904	0.974	A0A3Q2UCH4|1.308620615	1	417	121	21829	http://www.ebi.ac.uk/QuickGO/GTerm?id=GO:0071345
4	4	regulation of nitrogen compound metabolic process	GO:0051171	0.904	0.974	PBXIP1|1.284159514;A0A3Q2U6J9|1.340342648;A0A3Q2UCH4|1.308620615;A0A3Q3AZP2|1.434367428;EIF3I|1.293629736;PRDX6|1.247143535;MOSPD1|1.300070747;SMYD1|1.332742776;EDF1|1.274072423;HSP70|1.283172572;DPH5|0.719312178;TAF15|0.685582591;SRSF2|0.465409726;PBEF1|0.760519451;SUB1|0.814720615;HP1BP3|0.72359077;ORMDL3|0.402916918	17	3958	121	21829	http://www.ebi.ac.uk/QuickGO/GTerm?id=GO:0051171
5	5	lipid biosynthetic process	GO:0008610	0.905	0.974	ORMDL3|0.402916918	1	419	121	21829	http://www.ebi.ac.uk/QuickGO/GTerm?id=GO:0008610
3	3	multicellular organismal reproductive process	GO:0048609	0.905	0.974	HSP70|1.283172572	1	420	121	21829	http://www.ebi.ac.uk/QuickGO/GTerm?id=GO:0048609
6	5,6	regulation of gene expression	GO:0010468	0.905	0.974	PBXIP1|1.284159514;A0A3Q2U6J9|1.340342648;A0A3Q2UCH4|1.308620615;EIF3I|1.293629736;PRDX6|1.247143535;MOSPD1|1.300070747;SMYD1|1.332742776;EDF1|1.274072423;HSP70|1.283172572;DPH5|0.719312178;A0A3Q2U769|0.584188784;TAF15|0.685582591;SRSF2|0.465409726;PPP1CB|0.799006051;PBEF1|0.760519451;SUB1|0.814720615;HP1BP3|0.72359077	17	3963	121	21829	http://www.ebi.ac.uk/QuickGO/GTerm?id=GO:0010468
5	5	cellular nitrogen compound biosynthetic process	GO:0044271	0.906	0.974	PBXIP1|1.284159514;ENO1|1.301513562;A0A3Q2UEL1|1.305534201;ACAT1|1.26178047;EIF3I|1.293629736;MOSPD1|1.300070747;AMPD3|1.306784743;ATP5F1|1.373436785;ADSSL1|1.469655536;EEF1B2|1.322594905;SMYD1|1.332742776;RPL27|1.485323169;EDF1|1.274072423;HSP70|1.283172572;DPH5|0.719312178;TAF15|0.685582591;PANK4|0.649364304;MTHFD1L|0.749713642;PBEF1|0.760519451;SUB1|0.814720615;HP1BP3|0.72359077;ORMDL3|0.40291…	22	4956	121	21829	http://www.ebi.ac.uk/QuickGO/GTerm?id=GO:0044271
4	4	regulation of immune response	GO:0050776	0.906	0.974	A0A3Q2UCH4|1.308620615	1	422	121	21829	http://www.ebi.ac.uk/QuickGO/GTerm?id=GO:0050776
4	4	cellular aromatic compound metabolic process	GO:0006725	0.907	0.974	PBXIP1|1.284159514;ENO1|1.301513562;A0A3Q2UEL1|1.305534201;ACAT1|1.26178047;PRDX6|1.247143535;MOSPD1|1.300070747;AMPD3|1.306784743;GPI|1.354148803;ATP5F1|1.373436785;PGK1|1.22553449;ADSSL1|1.469655536;RTCB|1.284666414;SMYD1|1.332742776;ENO3|1.243593921;UBE2V2|1.250642582;OARD1|1.518785107;EDF1|1.274072423;HSP70|1.283172572;COX7C|1.254685321;ALDOC|1.365001997;TAF15|0.685582591;PANK4|0.649364304;MT…	27	5935	121	21829	http://www.ebi.ac.uk/QuickGO/GTerm?id=GO:0006725
3	3	multicellular organism reproduction	GO:0032504	0.91	0.976	HSP70|1.283172572	1	428	121	21829	http://www.ebi.ac.uk/QuickGO/GTerm?id=GO:0032504
2	2	growth	GO:0040007	0.911	0.977	A0A3Q2U769|0.584188784;DPYSL2|0.795640031	2	717	121	21829	http://www.ebi.ac.uk/QuickGO/GTerm?id=GO:0040007
3	3	negative regulation of multicellular organismal process	GO:0051241	0.914	0.978	ATP2A1|1.2337889;FKBP12.6|0.773369444	2	726	121	21829	http://www.ebi.ac.uk/QuickGO/GTerm?id=GO:0051241
6	5,6	positive regulation of gene expression	GO:0010628	0.915	0.978	PRDX6|1.247143535;MOSPD1|1.300070747;A0A3Q2U769|0.584188784;PBEF1|0.760519451;SUB1|0.814720615	5	1463	121	21829	http://www.ebi.ac.uk/QuickGO/GTerm?id=GO:0010628
5	5	mitotic cell cycle	GO:0000278	0.915	0.978	RANBP1|1.340088175;HSP70|1.283172572	2	727	121	21829	http://www.ebi.ac.uk/QuickGO/GTerm?id=GO:0000278
5	4,5	regulation of signal transduction	GO:0009966	0.915	0.978	A0A3Q2UCH4|1.308620615;A0A3Q3AZP2|1.434367428;UCH-L1|1.43716929;CILP|1.39877359;HSPB1|1.337774448;PPP1R2|0.797609752;FKBP12.6|0.773369444;GLIPR2|0.785712158	8	2135	121	21829	http://www.ebi.ac.uk/QuickGO/GTerm?id=GO:0009966
7	4,5,7	apoptotic signaling pathway	GO:0097190	0.915	0.978	HSPB1|1.337774448	1	440	121	21829	http://www.ebi.ac.uk/QuickGO/GTerm?id=GO:0097190
5	5	skeletal system development	GO:0001501	0.915	0.978	MTHFD1L|0.749713642	1	440	121	21829	http://www.ebi.ac.uk/QuickGO/GTerm?id=GO:0001501
4	4	regulation of cell cycle process	GO:0010564	0.919	0.981	RANBP1|1.340088175	1	448	121	21829	http://www.ebi.ac.uk/QuickGO/GTerm?id=GO:0010564
6	6	endocytosis	GO:0006897	0.919	0.981	RAB5C|2.549741805	1	448	121	21829	http://www.ebi.ac.uk/QuickGO/GTerm?id=GO:0006897
4	3,4	sexual reproduction	GO:0019953	0.92	0.981	HSP70|1.283172572	1	450	121	21829	http://www.ebi.ac.uk/QuickGO/GTerm?id=GO:0019953
3	3	regulation of growth	GO:0040008	0.921	0.982	DPYSL2|0.795640031	1	452	121	21829	http://www.ebi.ac.uk/QuickGO/GTerm?id=GO:0040008
7	6,7	ncRNA metabolic process	GO:0034660	0.922	0.982	RTCB|1.284666414	1	455	121	21829	http://www.ebi.ac.uk/QuickGO/GTerm?id=GO:0034660
3	3	microtubule-based process	GO:0007017	0.923	0.982	UCH-L1|1.43716929;RANBP1|1.340088175	2	749	121	21829	http://www.ebi.ac.uk/QuickGO/GTerm?id=GO:0007017
3	3	regulation of signaling	GO:0023051	0.923	0.982	A0A3Q2UCH4|1.308620615;A0A3Q3AZP2|1.434367428;UCH-L1|1.43716929;CILP|1.39877359;HSPB1|1.337774448;ENSGALG00000027330|1.235499055;PPP1R2|0.797609752;FKBP12.6|0.773369444;GLIPR2|0.785712158	9	2388	121	21829	http://www.ebi.ac.uk/QuickGO/GTerm?id=GO:0023051
4	4	positive regulation of nitrogen compound metabolic process	GO:0051173	0.924	0.982	A0A3Q3AZP2|1.434367428;PRDX6|1.247143535;MOSPD1|1.300070747;PBEF1|0.760519451;SUB1|0.814720615	5	1496	121	21829	http://www.ebi.ac.uk/QuickGO/GTerm?id=GO:0051173
3	3	multi-organism reproductive process	GO:0044703	0.926	0.983	HSP70|1.283172572	1	464	121	21829	http://www.ebi.ac.uk/QuickGO/GTerm?id=GO:0044703
7	5,6,7	positive regulation of RNA metabolic process	GO:0051254	0.927	0.983	PRDX6|1.247143535;MOSPD1|1.300070747;PBEF1|0.760519451;SUB1|0.814720615	4	1269	121	21829	http://www.ebi.ac.uk/QuickGO/GTerm?id=GO:0051254
6	6	cellular response to growth factor stimulus	GO:0071363	0.928	0.983	HSPB1|1.337774448	1	468	121	21829	http://www.ebi.ac.uk/QuickGO/GTerm?id=GO:0071363
6	6	apoptotic process	GO:0006915	0.928	0.983	A0A3Q2U6J9|1.340342648;A0A3Q3AZP2|1.434367428;HSPB1|1.337774448;ALB|1.487005807	4	1274	121	21829	http://www.ebi.ac.uk/QuickGO/GTerm?id=GO:0006915
5	5	response to cytokine	GO:0034097	0.928	0.983	A0A3Q2UCH4|1.308620615	1	469	121	21829	http://www.ebi.ac.uk/QuickGO/GTerm?id=GO:0034097
5	5	aromatic compound biosynthetic process	GO:0019438	0.93	0.983	PBXIP1|1.284159514;ENO1|1.301513562;A0A3Q2UEL1|1.305534201;ACAT1|1.26178047;MOSPD1|1.300070747;AMPD3|1.306784743;ATP5F1|1.373436785;ADSSL1|1.469655536;SMYD1|1.332742776;EDF1|1.274072423;HSP70|1.283172572;TAF15|0.685582591;PANK4|0.649364304;MTHFD1L|0.749713642;PBEF1|0.760519451;SUB1|0.814720615;HP1BP3|0.72359077	17	4095	121	21829	http://www.ebi.ac.uk/QuickGO/GTerm?id=GO:0019438
2	2	immune system process	GO:0002376	0.931	0.983	A0A3Q2UCH4|1.308620615;AMPD3|1.306784743;GPI|1.354148803;ogchi|0.611712077;FKBP12.6|0.773369444	5	1523	121	21829	http://www.ebi.ac.uk/QuickGO/GTerm?id=GO:0002376
5	5	response to growth factor	GO:0070848	0.931	0.983	HSPB1|1.337774448	1	477	121	21829	http://www.ebi.ac.uk/QuickGO/GTerm?id=GO:0070848
3	3	leukocyte activation	GO:0045321	0.932	0.983	FKBP12.6|0.773369444	1	479	121	21829	http://www.ebi.ac.uk/QuickGO/GTerm?id=GO:0045321
4	4	organic cyclic compound metabolic process	GO:1901360	0.933	0.983	PBXIP1|1.284159514;ENO1|1.301513562;A0A3Q2UEL1|1.305534201;ACAT1|1.26178047;PRDX6|1.247143535;MOSPD1|1.300070747;AMPD3|1.306784743;GPI|1.354148803;ATP5F1|1.373436785;PGK1|1.22553449;ADSSL1|1.469655536;RTCB|1.284666414;SMYD1|1.332742776;ENO3|1.243593921;UBE2V2|1.250642582;OARD1|1.518785107;EDF1|1.274072423;HSP70|1.283172572;COX7C|1.254685321;ALDOC|1.365001997;TAF15|0.685582591;PANK4|0.649364304;MT…	27	6091	121	21829	http://www.ebi.ac.uk/QuickGO/GTerm?id=GO:1901360
5	5	heterocycle biosynthetic process	GO:0018130	0.933	0.983	PBXIP1|1.284159514;ENO1|1.301513562;A0A3Q2UEL1|1.305534201;ACAT1|1.26178047;MOSPD1|1.300070747;AMPD3|1.306784743;ATP5F1|1.373436785;ADSSL1|1.469655536;SMYD1|1.332742776;EDF1|1.274072423;HSP70|1.283172572;TAF15|0.685582591;PANK4|0.649364304;MTHFD1L|0.749713642;PBEF1|0.760519451;SUB1|0.814720615;HP1BP3|0.72359077	17	4110	121	21829	http://www.ebi.ac.uk/QuickGO/GTerm?id=GO:0018130
4	4	microtubule cytoskeleton organization	GO:0000226	0.933	0.983	RANBP1|1.340088175	1	481	121	21829	http://www.ebi.ac.uk/QuickGO/GTerm?id=GO:0000226
7	6,7	DNA repair	GO:0006281	0.933	0.983	UBE2V2|1.250642582	1	481	121	21829	http://www.ebi.ac.uk/QuickGO/GTerm?id=GO:0006281
5	5	programmed cell death	GO:0012501	0.934	0.983	A0A3Q2U6J9|1.340342648;A0A3Q3AZP2|1.434367428;HSPB1|1.337774448;ALB|1.487005807	4	1296	121	21829	http://www.ebi.ac.uk/QuickGO/GTerm?id=GO:0012501
3	3	regulation of cellular process	GO:0050794	0.934	0.983	PBXIP1|1.284159514;RYR3|1.208753681;TXNRD3|1.204580616;A0A3Q2U6J9|1.340342648;A0A3Q2UCH4|1.308620615;A0A3Q3AZP2|1.434367428;UCH-L1|1.43716929;LMOD3|1.522555731;EIF3I|1.293629736;CILP|1.39877359;MYOM1|1.254881107;PRDX6|1.247143535;MOSPD1|1.300070747;GPI|1.354148803;ARL8B|1.209421094;MYPN|1.223593919;ARHGDIA|1.261342819;HSPB1|1.337774448;SMYD1|1.332742776;ENSGALG00000002907|1.322866394;ALB|1.487005…	50	10416	121	21829	http://www.ebi.ac.uk/QuickGO/GTerm?id=GO:0050794
5	5	cellular response to organic substance	GO:0071310	0.935	0.983	A0A3Q2TTX7|1.32240644;A0A3Q2UCH4|1.308620615;A0A3Q3ATJ1|1.201501275;HSPB1|1.337774448;FKBP12.6|0.773369444	5	1539	121	21829	http://www.ebi.ac.uk/QuickGO/GTerm?id=GO:0071310
5	4,5	single organismal cell-cell adhesion	GO:0016337	0.936	0.983	HSPB1|1.337774448	1	489	121	21829	http://www.ebi.ac.uk/QuickGO/GTerm?id=GO:0016337
4	4	positive regulation of molecular function	GO:0044093	0.936	0.983	A0A3Q3AZP2|1.434367428;RANBP1|1.340088175;EDF1|1.274072423;HSP70|1.283172572;CAB39|1.21239245	5	1546	121	21829	http://www.ebi.ac.uk/QuickGO/GTerm?id=GO:0044093
8	6,8	neuron differentiation	GO:0030182	0.936	0.983	UCH-L1|1.43716929;FKBP12.6|0.773369444;DPYSL2|0.795640031	3	1056	121	21829	http://www.ebi.ac.uk/QuickGO/GTerm?id=GO:0030182
6	5,6	enzyme linked receptor protein signaling pathway	GO:0007167	0.939	0.985	CILP|1.39877359;HSPB1|1.337774448	2	800	121	21829	http://www.ebi.ac.uk/QuickGO/GTerm?id=GO:0007167
3	3	response to endogenous stimulus	GO:0009719	0.939	0.985	A0A3Q2TTX7|1.32240644;A0A3Q3ATJ1|1.201501275;HSP70|1.283172572	3	1068	121	21829	http://www.ebi.ac.uk/QuickGO/GTerm?id=GO:0009719
2	2	multi-organism process	GO:0051704	0.941	0.987	HSPB1|1.337774448;ALB|1.487005807;HSP70|1.283172572	3	1075	121	21829	http://www.ebi.ac.uk/QuickGO/GTerm?id=GO:0051704
5	5	positive regulation of catalytic activity	GO:0043085	0.944	0.989	A0A3Q3AZP2|1.434367428;RANBP1|1.340088175;HSP70|1.283172572;CAB39|1.21239245	4	1338	121	21829	http://www.ebi.ac.uk/QuickGO/GTerm?id=GO:0043085
8	8	chemical synaptic transmission	GO:0007268	0.945	0.989	ENSGALG00000027330|1.235499055	1	515	121	21829	http://www.ebi.ac.uk/QuickGO/GTerm?id=GO:0007268
5	4,5	regulation of cell cycle	GO:0051726	0.945	0.989	RANBP1|1.340088175;HSP70|1.283172572	2	821	121	21829	http://www.ebi.ac.uk/QuickGO/GTerm?id=GO:0051726
5	5	nucleobase-containing compound biosynthetic process	GO:0034654	0.945	0.989	PBXIP1|1.284159514;ENO1|1.301513562;A0A3Q2UEL1|1.305534201;ACAT1|1.26178047;MOSPD1|1.300070747;AMPD3|1.306784743;ATP5F1|1.373436785;ADSSL1|1.469655536;SMYD1|1.332742776;EDF1|1.274072423;HSP70|1.283172572;TAF15|0.685582591;PANK4|0.649364304;PBEF1|0.760519451;SUB1|0.814720615;HP1BP3|0.72359077	16	3988	121	21829	http://www.ebi.ac.uk/QuickGO/GTerm?id=GO:0034654
5	5	organic cyclic compound biosynthetic process	GO:1901362	0.946	0.989	PBXIP1|1.284159514;ENO1|1.301513562;A0A3Q2UEL1|1.305534201;ACAT1|1.26178047;MOSPD1|1.300070747;AMPD3|1.306784743;ATP5F1|1.373436785;ADSSL1|1.469655536;SMYD1|1.332742776;EDF1|1.274072423;HSP70|1.283172572;TAF15|0.685582591;PANK4|0.649364304;MTHFD1L|0.749713642;PBEF1|0.760519451;SUB1|0.814720615;HP1BP3|0.72359077	17	4200	121	21829	http://www.ebi.ac.uk/QuickGO/GTerm?id=GO:1901362
6	6	positive regulation of hydrolase activity	GO:0051345	0.947	0.989	RANBP1|1.340088175;HSP70|1.283172572	2	830	121	21829	http://www.ebi.ac.uk/QuickGO/GTerm?id=GO:0051345
7	5,6,7	positive regulation of macromolecule biosynthetic process	GO:0010557	0.948	0.99	MOSPD1|1.300070747;HSPB1|1.337774448;PBEF1|0.760519451;SUB1|0.814720615	4	1360	121	21829	http://www.ebi.ac.uk/QuickGO/GTerm?id=GO:0010557
4	4	macromolecule metabolic process	GO:0043170	0.949	0.99	PBXIP1|1.284159514;DUSP3|1.289465091;A0A3Q2U6J9|1.340342648;A0A3Q2UCH4|1.308620615;PTGES3|1.249959146;A0A3Q2UDT6|1.205693283;CAMK2D|1.395725167;A0A3Q3AZP2|1.434367428;UCH-L1|1.43716929;EIF3I|1.293629736;PSMD6|1.32702021;PRDX6|1.247143535;MOSPD1|1.300070747;NPEPL1|1.259782993;EEF1B2|1.322594905;RTCB|1.284666414;HSPB1|1.337774448;SMYD1|1.332742776;RPL27|1.485323169;BLMH|1.469427111;UBE2V2|1.2506425…	48	10180	121	21829	http://www.ebi.ac.uk/QuickGO/GTerm?id=GO:0043170
4	4	response to hormone	GO:0009725	0.95	0.99	HSP70|1.283172572	1	533	121	21829	http://www.ebi.ac.uk/QuickGO/GTerm?id=GO:0009725
4	3,4	single organism cell adhesion	GO:0098602	0.951	0.991	HSPB1|1.337774448	1	537	121	21829	http://www.ebi.ac.uk/QuickGO/GTerm?id=GO:0098602
2	2	single-organism process	GO:0044699	0.952	0.991	KBTBD10|1.353350665;PBXIP1|1.284159514;RYR3|1.208753681;DHRS7C|1.334774673;ATP2B4|1.454010951;IMPA1|1.338855168;ATP2B2|1.385296881;TXNRD3|1.204580616;UCH-L1|1.43716929;ACAT1|1.26178047;LMOD3|1.522555731;CILP|1.39877359;MYOM1|1.254881107;PRDX6|1.247143535;AMPD3|1.306784743;PDLIM3|1.286425032;GPI|1.354148803;MYOM2|1.223302409;SDHA|1.217654696;ATP5F1|1.373436785;PGK1|1.22553449;ADSSL1|1.469655536;CY…	75	14985	121	21829	http://www.ebi.ac.uk/QuickGO/GTerm?id=GO:0044699
3	3	positive regulation of immune system process	GO:0002684	0.952	0.991	GPI|1.354148803	1	541	121	21829	http://www.ebi.ac.uk/QuickGO/GTerm?id=GO:0002684
4	4	cell death	GO:0008219	0.953	0.991	A0A3Q2U6J9|1.340342648;A0A3Q3AZP2|1.434367428;HSPB1|1.337774448;ALB|1.487005807	4	1385	121	21829	http://www.ebi.ac.uk/QuickGO/GTerm?id=GO:0008219
4	4	cellular response to chemical stimulus	GO:0070887	0.954	0.991	A0A3Q2TTX7|1.32240644;A0A3Q2UCH4|1.308620615;A0A3Q2UDT6|1.205693283;A0A3Q3ATJ1|1.201501275;HSPB1|1.337774448;FKBP12.6|0.773369444	6	1874	121	21829	http://www.ebi.ac.uk/QuickGO/GTerm?id=GO:0070887
3	3	positive regulation of response to stimulus	GO:0048584	0.955	0.992	A0A3Q3AZP2|1.434367428;HSPB1|1.337774448;FKBP12.6|0.773369444;GLIPR2|0.785712158	4	1396	121	21829	http://www.ebi.ac.uk/QuickGO/GTerm?id=GO:0048584
4	4	regulation of cellular localization	GO:0060341	0.958	0.994	GPI|1.354148803;FKBP12.6|0.773369444	2	878	121	21829	http://www.ebi.ac.uk/QuickGO/GTerm?id=GO:0060341
6	6	anion transport	GO:0006820	0.96	0.995	A0A3Q3AZP2|1.434367428	1	570	121	21829	http://www.ebi.ac.uk/QuickGO/GTerm?id=GO:0006820
7	7	generation of neurons	GO:0048699	0.96	0.996	UCH-L1|1.43716929;FKBP12.6|0.773369444;DPYSL2|0.795640031	3	1168	121	21829	http://www.ebi.ac.uk/QuickGO/GTerm?id=GO:0048699
6	5,6	positive regulation of nucleobase-containing compound metabolic process	GO:0045935	0.961	0.996	PRDX6|1.247143535;MOSPD1|1.300070747;PBEF1|0.760519451;SUB1|0.814720615	4	1432	121	21829	http://www.ebi.ac.uk/QuickGO/GTerm?id=GO:0045935
9	7,8,9	negative regulation of transcription from RNA polymerase II promoter	GO:0000122	0.962	0.996	MOSPD1|1.300070747	1	582	121	21829	http://www.ebi.ac.uk/QuickGO/GTerm?id=GO:0000122
6	5,6	positive regulation of cellular biosynthetic process	GO:0031328	0.965	0.999	MOSPD1|1.300070747;HSPB1|1.337774448;PBEF1|0.760519451;SUB1|0.814720615	4	1461	121	21829	http://www.ebi.ac.uk/QuickGO/GTerm?id=GO:0031328
5	5	vesicle-mediated transport	GO:0016192	0.967	0.999	RAB5C|2.549741805;VPS29|0.751790268;LOC100859860|0.744437258	3	1209	121	21829	http://www.ebi.ac.uk/QuickGO/GTerm?id=GO:0016192
4	4	cellular response to endogenous stimulus	GO:0071495	0.967	0.999	A0A3Q2TTX7|1.32240644;A0A3Q3ATJ1|1.201501275	2	927	121	21829	http://www.ebi.ac.uk/QuickGO/GTerm?id=GO:0071495
4	4	positive regulation of biosynthetic process	GO:0009891	0.968	0.999	MOSPD1|1.300070747;HSPB1|1.337774448;PBEF1|0.760519451;SUB1|0.814720615	4	1478	121	21829	http://www.ebi.ac.uk/QuickGO/GTerm?id=GO:0009891
2	2	response to stimulus	GO:0050896	0.968	0.999	TXNRD3|1.204580616;A0A3Q2TTX7|1.32240644;A0A3Q2UCH4|1.308620615;A0A3Q2UDT6|1.205693283;A0A3Q3ATJ1|1.201501275;A0A3Q3AZP2|1.434367428;UCH-L1|1.43716929;CILP|1.39877359;MYOM1|1.254881107;PRDX6|1.247143535;ARL8B|1.209421094;ARHGDIA|1.261342819;HSPB1|1.337774448;CKM|1.28135235;ALB|1.487005807;BLMH|1.469427111;UBE2V2|1.250642582;KPNA4|1.24977891;HSP70|1.283172572;RAB5C|2.549741805;ENSGALG00000027330|1…	33	7579	121	21829	http://www.ebi.ac.uk/QuickGO/GTerm?id=GO:0050896
7	7	positive regulation of GTPase activity	GO:0043547	0.969	0.999	RANBP1|1.340088175	1	618	121	21829	http://www.ebi.ac.uk/QuickGO/GTerm?id=GO:0043547
8	7,8	positive regulation of nucleic acid-templated transcription	GO:1903508	0.97	0.999	MOSPD1|1.300070747;PBEF1|0.760519451;SUB1|0.814720615	3	1230	121	21829	http://www.ebi.ac.uk/QuickGO/GTerm?id=GO:1903508
9	6,7,8,9	positive regulation of transcription, DNA-templated	GO:0045893	0.97	0.999	MOSPD1|1.300070747;PBEF1|0.760519451;SUB1|0.814720615	3	1230	121	21829	http://www.ebi.ac.uk/QuickGO/GTerm?id=GO:0045893
7	6,7	positive regulation of RNA biosynthetic process	GO:1902680	0.97	0.999	MOSPD1|1.300070747;PBEF1|0.760519451;SUB1|0.814720615	3	1231	121	21829	http://www.ebi.ac.uk/QuickGO/GTerm?id=GO:1902680
6	6	neurogenesis	GO:0022008	0.972	1.00e+00	UCH-L1|1.43716929;FKBP12.6|0.773369444;DPYSL2|0.795640031	3	1245	121	21829	http://www.ebi.ac.uk/QuickGO/GTerm?id=GO:0022008
3	3	single organism reproductive process	GO:0044702	0.974	1.00e+00	HSP70|1.283172572	1	645	121	21829	http://www.ebi.ac.uk/QuickGO/GTerm?id=GO:0044702
3	3	cell cycle process	GO:0022402	0.975	1.00e+00	RANBP1|1.340088175;HSP70|1.283172572	2	984	121	21829	http://www.ebi.ac.uk/QuickGO/GTerm?id=GO:0022402
4	4	organic substance biosynthetic process	GO:1901576	0.975	1.00e+00	PBXIP1|1.284159514;ENO1|1.301513562;A0A3Q2UEL1|1.305534201;ACAT1|1.26178047;EIF3I|1.293629736;MOSPD1|1.300070747;AMPD3|1.306784743;GPI|1.354148803;ATP5F1|1.373436785;ADSSL1|1.469655536;EEF1B2|1.322594905;HSPB1|1.337774448;SMYD1|1.332742776;ENO3|1.243593921;RPL27|1.485323169;EDF1|1.274072423;HSP70|1.283172572;DPH5|0.719312178;TAF15|0.685582591;PANK4|0.649364304;MTHFD1L|0.749713642;PBEF1|0.76051945…	25	6124	121	21829	http://www.ebi.ac.uk/QuickGO/GTerm?id=GO:1901576
5	5	gene expression	GO:0010467	0.976	1.00e+00	PBXIP1|1.284159514;A0A3Q2U6J9|1.340342648;A0A3Q2UCH4|1.308620615;EIF3I|1.293629736;PRDX6|1.247143535;MOSPD1|1.300070747;EEF1B2|1.322594905;RTCB|1.284666414;SMYD1|1.332742776;RPL27|1.485323169;EDF1|1.274072423;HSP70|1.283172572;DPH5|0.719312178;A0A3Q2U769|0.584188784;TAF15|0.685582591;SRSF2|0.465409726;PPP1CB|0.799006051;PBEF1|0.760519451;PRKCA|0.487532754;SUB1|0.814720615;HP1BP3|0.72359077	21	5336	121	21829	http://www.ebi.ac.uk/QuickGO/GTerm?id=GO:0010467
3	3	regulation of response to stimulus	GO:0048583	0.977	1.00e+00	A0A3Q2UCH4|1.308620615;A0A3Q3AZP2|1.434367428;UCH-L1|1.43716929;CILP|1.39877359;MYOM1|1.254881107;HSPB1|1.337774448;PPP1R2|0.797609752;FKBP12.6|0.773369444;GLIPR2|0.785712158	9	2776	121	21829	http://www.ebi.ac.uk/QuickGO/GTerm?id=GO:0048583
2	2	reproduction	GO:0000003	0.978	1.00e+00	HSP70|1.283172572	1	674	121	21829	http://www.ebi.ac.uk/QuickGO/GTerm?id=GO:0000003
4	4	cellular macromolecule metabolic process	GO:0044260	0.978	1.00e+00	PBXIP1|1.284159514;DUSP3|1.289465091;A0A3Q2U6J9|1.340342648;A0A3Q2UCH4|1.308620615;PTGES3|1.249959146;CAMK2D|1.395725167;A0A3Q3AZP2|1.434367428;UCH-L1|1.43716929;EIF3I|1.293629736;PSMD6|1.32702021;PRDX6|1.247143535;MOSPD1|1.300070747;EEF1B2|1.322594905;RTCB|1.284666414;HSPB1|1.337774448;SMYD1|1.332742776;RPL27|1.485323169;UBE2V2|1.250642582;RANBP1|1.340088175;EDF1|1.274072423;HSP70|1.283172572;CA…	41	9262	121	21829	http://www.ebi.ac.uk/QuickGO/GTerm?id=GO:0044260
6	4,5,6	positive regulation of signal transduction	GO:0009967	0.98	1.00e+00	A0A3Q3AZP2|1.434367428;GLIPR2|0.785712158	2	1028	121	21829	http://www.ebi.ac.uk/QuickGO/GTerm?id=GO:0009967
4	4	cell cycle	GO:0007049	0.98	1.00e+00	RANBP1|1.340088175;HSP70|1.283172572;PPP1CB|0.799006051	3	1325	121	21829	http://www.ebi.ac.uk/QuickGO/GTerm?id=GO:0007049
6	5,6	regulation of macromolecule biosynthetic process	GO:0010556	0.98	1.00e+00	PBXIP1|1.284159514;EIF3I|1.293629736;MOSPD1|1.300070747;HSPB1|1.337774448;SMYD1|1.332742776;EDF1|1.274072423;HSP70|1.283172572;DPH5|0.719312178;TAF15|0.685582591;PBEF1|0.760519451;SUB1|0.814720615;HP1BP3|0.72359077;ORMDL3|0.402916918	13	3715	121	21829	http://www.ebi.ac.uk/QuickGO/GTerm?id=GO:0010556
2	2	reproductive process	GO:0022414	0.981	1.00e+00	HSP70|1.283172572	1	701	121	21829	http://www.ebi.ac.uk/QuickGO/GTerm?id=GO:0022414
3	3	biosynthetic process	GO:0009058	0.982	1.00e+00	PBXIP1|1.284159514;ENO1|1.301513562;A0A3Q2UEL1|1.305534201;ACAT1|1.26178047;EIF3I|1.293629736;MOSPD1|1.300070747;AMPD3|1.306784743;GPI|1.354148803;ATP5F1|1.373436785;ADSSL1|1.469655536;EEF1B2|1.322594905;HSPB1|1.337774448;SMYD1|1.332742776;ENO3|1.243593921;RPL27|1.485323169;EDF1|1.274072423;HSP70|1.283172572;DPH5|0.719312178;TAF15|0.685582591;PANK4|0.649364304;MTHFD1L|0.749713642;PBEF1|0.76051945…	25	6244	121	21829	http://www.ebi.ac.uk/QuickGO/GTerm?id=GO:0009058
5	5	cellular response to DNA damage stimulus	GO:0006974	0.982	1.00e+00	UBE2V2|1.250642582	1	715	121	21829	http://www.ebi.ac.uk/QuickGO/GTerm?id=GO:0006974
False	obselete	obsolete death	GO:0016265	0.985	1.00e+00	HSPB1|1.337774448;ALB|1.487005807	2	1088	121	21829	http://www.ebi.ac.uk/QuickGO/GTerm?id=GO:0016265
4	4	defense response	GO:0006952	0.987	1.00e+00	A0A3Q2UCH4|1.308620615	1	773	121	21829	http://www.ebi.ac.uk/QuickGO/GTerm?id=GO:0006952
5	5	regulation of cellular biosynthetic process	GO:0031326	0.987	1.00e+00	PBXIP1|1.284159514;EIF3I|1.293629736;MOSPD1|1.300070747;HSPB1|1.337774448;SMYD1|1.332742776;EDF1|1.274072423;HSP70|1.283172572;DPH5|0.719312178;TAF15|0.685582591;PBEF1|0.760519451;SUB1|0.814720615;HP1BP3|0.72359077;ORMDL3|0.402916918	13	3859	121	21829	http://www.ebi.ac.uk/QuickGO/GTerm?id=GO:0031326
7	5,6,7	regulation of RNA metabolic process	GO:0051252	0.988	1.00e+00	PBXIP1|1.284159514;PRDX6|1.247143535;MOSPD1|1.300070747;SMYD1|1.332742776;EDF1|1.274072423;HSP70|1.283172572;TAF15|0.685582591;SRSF2|0.465409726;PBEF1|0.760519451;SUB1|0.814720615;HP1BP3|0.72359077	11	3420	121	21829	http://www.ebi.ac.uk/QuickGO/GTerm?id=GO:0051252
3	3	positive regulation of signaling	GO:0023056	0.988	1.00e+00	A0A3Q3AZP2|1.434367428;GLIPR2|0.785712158	2	1130	121	21829	http://www.ebi.ac.uk/QuickGO/GTerm?id=GO:0023056
4	4	regulation of biosynthetic process	GO:0009889	0.988	1.00e+00	PBXIP1|1.284159514;EIF3I|1.293629736;MOSPD1|1.300070747;HSPB1|1.337774448;SMYD1|1.332742776;EDF1|1.274072423;HSP70|1.283172572;DPH5|0.719312178;TAF15|0.685582591;PBEF1|0.760519451;SUB1|0.814720615;HP1BP3|0.72359077;ORMDL3|0.402916918	13	3886	121	21829	http://www.ebi.ac.uk/QuickGO/GTerm?id=GO:0009889
4	4	positive regulation of cell communication	GO:0010647	0.989	1.00e+00	A0A3Q3AZP2|1.434367428;GLIPR2|0.785712158	2	1141	121	21829	http://www.ebi.ac.uk/QuickGO/GTerm?id=GO:0010647
4	4	cellular biosynthetic process	GO:0044249	0.99	1.00e+00	PBXIP1|1.284159514;ENO1|1.301513562;A0A3Q2UEL1|1.305534201;ACAT1|1.26178047;EIF3I|1.293629736;MOSPD1|1.300070747;AMPD3|1.306784743;ATP5F1|1.373436785;ADSSL1|1.469655536;EEF1B2|1.322594905;HSPB1|1.337774448;SMYD1|1.332742776;RPL27|1.485323169;EDF1|1.274072423;HSP70|1.283172572;DPH5|0.719312178;TAF15|0.685582591;PANK4|0.649364304;MTHFD1L|0.749713642;PBEF1|0.760519451;SUB1|0.814720615;HP1BP3|0.72359…	23	6050	121	21829	http://www.ebi.ac.uk/QuickGO/GTerm?id=GO:0044249
3	3	immune response	GO:0006955	0.991	1.00e+00	A0A3Q2UCH4|1.308620615	1	838	121	21829	http://www.ebi.ac.uk/QuickGO/GTerm?id=GO:0006955
6	6	regulation of cellular macromolecule biosynthetic process	GO:2000112	0.993	1.00e+00	PBXIP1|1.284159514;EIF3I|1.293629736;MOSPD1|1.300070747;SMYD1|1.332742776;EDF1|1.274072423;HSP70|1.283172572;DPH5|0.719312178;TAF15|0.685582591;PBEF1|0.760519451;SUB1|0.814720615;HP1BP3|0.72359077	11	3597	121	21829	http://www.ebi.ac.uk/QuickGO/GTerm?id=GO:2000112
8	7,8	regulation of transcription from RNA polymerase II promoter	GO:0006357	0.994	1.00e+00	MOSPD1|1.300070747;PBEF1|0.760519451;SUB1|0.814720615	3	1592	121	21829	http://www.ebi.ac.uk/QuickGO/GTerm?id=GO:0006357
6	5,6	DNA metabolic process	GO:0006259	0.994	1.00e+00	UBE2V2|1.250642582	1	910	121	21829	http://www.ebi.ac.uk/QuickGO/GTerm?id=GO:0006259
5	5	regulation of nucleobase-containing compound metabolic process	GO:0019219	0.995	1.00e+00	PBXIP1|1.284159514;PRDX6|1.247143535;MOSPD1|1.300070747;SMYD1|1.332742776;EDF1|1.274072423;HSP70|1.283172572;TAF15|0.685582591;SRSF2|0.465409726;PBEF1|0.760519451;SUB1|0.814720615;HP1BP3|0.72359077	11	3687	121	21829	http://www.ebi.ac.uk/QuickGO/GTerm?id=GO:0019219
7	6,7	regulation of transcription, DNA-templated	GO:0006355	0.996	1.00e+00	PBXIP1|1.284159514;MOSPD1|1.300070747;SMYD1|1.332742776;EDF1|1.274072423;HSP70|1.283172572;TAF15|0.685582591;PBEF1|0.760519451;SUB1|0.814720615;HP1BP3|0.72359077	9	3246	121	21829	http://www.ebi.ac.uk/QuickGO/GTerm?id=GO:0006355
7	7	transcription from RNA polymerase II promoter	GO:0006366	0.996	1.00e+00	MOSPD1|1.300070747;PBEF1|0.760519451;SUB1|0.814720615	3	1664	121	21829	http://www.ebi.ac.uk/QuickGO/GTerm?id=GO:0006366
3	3	cell proliferation	GO:0008283	0.996	1.00e+00	UCH-L1|1.43716929;FKBP12.6|0.773369444	2	1349	121	21829	http://www.ebi.ac.uk/QuickGO/GTerm?id=GO:0008283
9	7,8,9	regulation of nucleic acid-templated transcription	GO:1903506	0.997	1.00e+00	PBXIP1|1.284159514;MOSPD1|1.300070747;SMYD1|1.332742776;EDF1|1.274072423;HSP70|1.283172572;TAF15|0.685582591;PBEF1|0.760519451;SUB1|0.814720615;HP1BP3|0.72359077	9	3309	121	21829	http://www.ebi.ac.uk/QuickGO/GTerm?id=GO:1903506
6	6	regulation of RNA biosynthetic process	GO:2001141	0.997	1.00e+00	PBXIP1|1.284159514;MOSPD1|1.300070747;SMYD1|1.332742776;EDF1|1.274072423;HSP70|1.283172572;TAF15|0.685582591;PBEF1|0.760519451;SUB1|0.814720615;HP1BP3|0.72359077	9	3310	121	21829	http://www.ebi.ac.uk/QuickGO/GTerm?id=GO:2001141
6	6	transcription, DNA-templated	GO:0006351	0.997	1.00e+00	PBXIP1|1.284159514;MOSPD1|1.300070747;SMYD1|1.332742776;EDF1|1.274072423;HSP70|1.283172572;TAF15|0.685582591;PBEF1|0.760519451;SUB1|0.814720615;HP1BP3|0.72359077	9	3380	121	21829	http://www.ebi.ac.uk/QuickGO/GTerm?id=GO:0006351
8	7,8	nucleic acid-templated transcription	GO:0097659	0.998	1.00e+00	PBXIP1|1.284159514;MOSPD1|1.300070747;SMYD1|1.332742776;EDF1|1.274072423;HSP70|1.283172572;TAF15|0.685582591;PBEF1|0.760519451;SUB1|0.814720615;HP1BP3|0.72359077	9	3436	121	21829	http://www.ebi.ac.uk/QuickGO/GTerm?id=GO:0097659
5	4,5	cell surface receptor signaling pathway	GO:0007166	0.998	1.00e+00	A0A3Q2UCH4|1.308620615;CILP|1.39877359;ARHGDIA|1.261342819;HSPB1|1.337774448	4	2123	121	21829	http://www.ebi.ac.uk/QuickGO/GTerm?id=GO:0007166
7	6,7	RNA biosynthetic process	GO:0032774	0.998	1.00e+00	PBXIP1|1.284159514;MOSPD1|1.300070747;SMYD1|1.332742776;EDF1|1.274072423;HSP70|1.283172572;TAF15|0.685582591;PBEF1|0.760519451;SUB1|0.814720615;HP1BP3|0.72359077	9	3454	121	21829	http://www.ebi.ac.uk/QuickGO/GTerm?id=GO:0032774
3	3	cellular response to stimulus	GO:0051716	0.999	1.00e+00	A0A3Q2TTX7|1.32240644;A0A3Q2UCH4|1.308620615;A0A3Q2UDT6|1.205693283;A0A3Q3ATJ1|1.201501275;A0A3Q3AZP2|1.434367428;UCH-L1|1.43716929;CILP|1.39877359;MYOM1|1.254881107;ARL8B|1.209421094;ARHGDIA|1.261342819;HSPB1|1.337774448;ALB|1.487005807;UBE2V2|1.250642582;RAB5C|2.549741805;CAB39|1.21239245;ERP44|0.745186445;FGB|0.807555904;PRKAB2|0.71569607;PPP1R2|0.797609752;PRKCA|0.487532754;FKBP12.6|0.7733694…	22	6488	121	21829	http://www.ebi.ac.uk/QuickGO/GTerm?id=GO:0051716
5	5	macromolecule biosynthetic process	GO:0009059	0.999	1.00e+00	PBXIP1|1.284159514;EIF3I|1.293629736;MOSPD1|1.300070747;EEF1B2|1.322594905;HSPB1|1.337774448;SMYD1|1.332742776;RPL27|1.485323169;EDF1|1.274072423;HSP70|1.283172572;DPH5|0.719312178;TAF15|0.685582591;PBEF1|0.760519451;SUB1|0.814720615;HP1BP3|0.72359077;ORMDL3|0.402916918	15	5009	121	21829	http://www.ebi.ac.uk/QuickGO/GTerm?id=GO:0009059
3	3	cell communication	GO:0007154	0.999	1.00e+00	A0A3Q2UCH4|1.308620615;A0A3Q3ATJ1|1.201501275;A0A3Q3AZP2|1.434367428;UCH-L1|1.43716929;CILP|1.39877359;MYOM1|1.254881107;ARL8B|1.209421094;ARHGDIA|1.261342819;HSPB1|1.337774448;ALB|1.487005807;RAB5C|2.549741805;ENSGALG00000027330|1.235499055;CAB39|1.21239245;FGB|0.807555904;PRKAB2|0.71569607;PPP1R2|0.797609752;PRKCA|0.487532754;FKBP12.6|0.773369444;GLIPR2|0.785712158	19	5904	121	21829	http://www.ebi.ac.uk/QuickGO/GTerm?id=GO:0007154
6	5,6	RNA metabolic process	GO:0016070	0.999	1.00e+00	PBXIP1|1.284159514;PRDX6|1.247143535;MOSPD1|1.300070747;RTCB|1.284666414;SMYD1|1.332742776;EDF1|1.274072423;HSP70|1.283172572;TAF15|0.685582591;SRSF2|0.465409726;PBEF1|0.760519451;SUB1|0.814720615;HP1BP3|0.72359077	12	4404	121	21829	http://www.ebi.ac.uk/QuickGO/GTerm?id=GO:0016070
2	2	signaling	GO:0023052	1.00e+00	1.00e+00	A0A3Q2UCH4|1.308620615;A0A3Q3ATJ1|1.201501275;A0A3Q3AZP2|1.434367428;UCH-L1|1.43716929;CILP|1.39877359;ARL8B|1.209421094;ARHGDIA|1.261342819;HSPB1|1.337774448;RAB5C|2.549741805;ENSGALG00000027330|1.235499055;CAB39|1.21239245;FGB|0.807555904;PRKAB2|0.71569607;PPP1R2|0.797609752;PRKCA|0.487532754;FKBP12.6|0.773369444;GLIPR2|0.785712158	17	5761	121	21829	http://www.ebi.ac.uk/QuickGO/GTerm?id=GO:0023052
5	5	cellular macromolecule biosynthetic process	GO:0034645	1.00e+00	1.00e+00	PBXIP1|1.284159514;EIF3I|1.293629736;MOSPD1|1.300070747;EEF1B2|1.322594905;SMYD1|1.332742776;RPL27|1.485323169;EDF1|1.274072423;HSP70|1.283172572;DPH5|0.719312178;TAF15|0.685582591;PBEF1|0.760519451;SUB1|0.814720615;HP1BP3|0.72359077	13	4881	121	21829	http://www.ebi.ac.uk/QuickGO/GTerm?id=GO:0034645
4	3,4	signal transduction	GO:0007165	1.00e+00	1.00e+00	A0A3Q2UCH4|1.308620615;A0A3Q3AZP2|1.434367428;UCH-L1|1.43716929;CILP|1.39877359;ARL8B|1.209421094;ARHGDIA|1.261342819;HSPB1|1.337774448;RAB5C|2.549741805;CAB39|1.21239245;FGB|0.807555904;PRKAB2|0.71569607;PPP1R2|0.797609752;PRKCA|0.487532754;FKBP12.6|0.773369444;GLIPR2|0.785712158	15	5353	121	21829	http://www.ebi.ac.uk/QuickGO/GTerm?id=GO:0007165
5	5	nucleic acid metabolic process	GO:0090304	1.00e+00	1.00e+00	PBXIP1|1.284159514;PRDX6|1.247143535;MOSPD1|1.300070747;RTCB|1.284666414;SMYD1|1.332742776;UBE2V2|1.250642582;EDF1|1.274072423;HSP70|1.283172572;TAF15|0.685582591;SRSF2|0.465409726;PBEF1|0.760519451;SUB1|0.814720615;HP1BP3|0.72359077	13	5014	121	21829	http://www.ebi.ac.uk/QuickGO/GTerm?id=GO:0090304
3	3	single organism signaling	GO:0044700	1.00e+00	1.00e+00	UCH-L1|1.43716929;CILP|1.39877359;ARL8B|1.209421094;ARHGDIA|1.261342819;HSPB1|1.337774448;RAB5C|2.549741805;ENSGALG00000027330|1.235499055;CAB39|1.21239245;FGB|0.807555904;PRKAB2|0.71569607;PPP1R2|0.797609752;PRKCA|0.487532754;FKBP12.6|0.773369444;GLIPR2|0.785712158	14	5739	121	21829	http://www.ebi.ac.uk/QuickGO/GTerm?id=GO:0044700
9	7,8,9	positive regulation of macromitophagy	GO:1901526	1.00e+00	1.00e+00	A0A3Q2UCH4|1.308620615	1	0	121	21829	http://www.ebi.ac.uk/QuickGO/GTerm?id=GO:1901526
7	7	positive regulation of mitophagy in response to mitochondrial depolarization	GO:1904925	1.00e+00	1.00e+00	A0A3Q2UCH4|1.308620615	1	0	121	21829	http://www.ebi.ac.uk/QuickGO/GTerm?id=GO:1904925
6	5,6	nucleobase-containing small molecule biosynthetic process	GO:0034404	1.00e+00	1.00e+00	ENO1|1.301513562	1	0	121	21829	http://www.ebi.ac.uk/QuickGO/GTerm?id=GO:0034404

## Sheet: CC-P120 vs P90
maxLevel	levels	GO_Name	GO_ID	Pvalue	Pvalue_adjusted	Genes	Count	Pop_Hit	List_Total	Background_Genes	URL
7	4,6,7	myofibril	GO:0030016	2.23e-14	6.6e-12	TNNT3|1.527716062;LMOD3|1.522555731;ENSGALG00000000295|1.49801844;MYOM1|1.254881107;MYOM2|1.223302409;MYPN|1.223593919;HSPB1|1.337774448;ENSGALG00000002907|1.322866394;TPM1|1.390357267;P13538|1.306581388;ATP2A1|1.2337889;MYBPC2|1.243510197;CAPZA2|1.308764545;ENSGALG00000027330|1.235499055;FKBP12.6|0.773369444	15	178	110	21280	http://www.ebi.ac.uk/QuickGO/GTerm?id=GO:0030016
6	3,5,6	contractile fiber	GO:0043292	5.42e-14	8.03e-12	TNNT3|1.527716062;LMOD3|1.522555731;ENSGALG00000000295|1.49801844;MYOM1|1.254881107;MYOM2|1.223302409;MYPN|1.223593919;HSPB1|1.337774448;ENSGALG00000002907|1.322866394;TPM1|1.390357267;P13538|1.306581388;ATP2A1|1.2337889;MYBPC2|1.243510197;CAPZA2|1.308764545;ENSGALG00000027330|1.235499055;FKBP12.6|0.773369444	15	189	110	21280	http://www.ebi.ac.uk/QuickGO/GTerm?id=GO:0043292
8	4,5,7,8	sarcomere	GO:0030017	1.3e-12	1.28e-10	TNNT3|1.527716062;LMOD3|1.522555731;ENSGALG00000000295|1.49801844;MYOM1|1.254881107;MYOM2|1.223302409;MYPN|1.223593919;HSPB1|1.337774448;TPM1|1.390357267;ATP2A1|1.2337889;MYBPC2|1.243510197;CAPZA2|1.308764545;ENSGALG00000027330|1.235499055;FKBP12.6|0.773369444	13	154	110	21280	http://www.ebi.ac.uk/QuickGO/GTerm?id=GO:0030017
7	3,4,6,7	contractile fiber part	GO:0044449	4.27e-12	3.16e-10	TNNT3|1.527716062;LMOD3|1.522555731;ENSGALG00000000295|1.49801844;MYOM1|1.254881107;MYOM2|1.223302409;MYPN|1.223593919;HSPB1|1.337774448;TPM1|1.390357267;ATP2A1|1.2337889;MYBPC2|1.243510197;CAPZA2|1.308764545;ENSGALG00000027330|1.235499055;FKBP12.6|0.773369444	13	169	110	21280	http://www.ebi.ac.uk/QuickGO/GTerm?id=GO:0044449
4	4	cytoplasm	GO:0005737	1.84e-11	1.09e-09	A0A1D5PPT0|1.203939941;ENO1|1.301513562;TNNT3|1.527716062;A0A3Q2U6J9|1.340342648;A0A3Q2UCH4|1.308620615;A0A3Q2UDT6|1.205693283;A0A3Q3ATJ1|1.201501275;A0A3Q3AZP2|1.434367428;UCH-L1|1.43716929;SH3BGR|1.484858486;ACAT1|1.26178047;LMOD3|1.522555731;EIF3I|1.293629736;ENSGALG00000000295|1.49801844;MYOM1|1.254881107;PRDX6|1.247143535;MOSPD1|1.300070747;PDLIM3|1.286425032;GPI|1.354148803;MYOM2|1.22330240…	81	8963	110	21280	http://www.ebi.ac.uk/QuickGO/GTerm?id=GO:0005737
4	4	extracellular exosome	GO:0070062	1.54e-09	5.55e-08	UCH-L1|1.43716929;ACAT1|1.26178047;EIF3I|1.293629736;CILP|1.39877359;PSMD6|1.32702021;PRDX6|1.247143535;GPI|1.354148803;ATP5F1|1.373436785;CYB5R3|1.501083223;ARL8B|1.209421094;ARHGDIA|1.261342819;HSPB1|1.337774448;CAPZA2|1.308764545;RPL27|1.485323169;BLMH|1.469427111;UBE2V2|1.250642582;KPNA4|1.24977891;EDF1|1.274072423;HSP70|1.283172572;CAB39|1.21239245;ALDOC|1.365001997;ERP44|0.745186445;SAMM50|…	32	1927	110	21280	http://www.ebi.ac.uk/QuickGO/GTerm?id=GO:0070062
4	4	extracellular membrane-bounded organelle	GO:0065010	1.55e-09	5.55e-08	UCH-L1|1.43716929;ACAT1|1.26178047;EIF3I|1.293629736;CILP|1.39877359;PSMD6|1.32702021;PRDX6|1.247143535;GPI|1.354148803;ATP5F1|1.373436785;CYB5R3|1.501083223;ARL8B|1.209421094;ARHGDIA|1.261342819;HSPB1|1.337774448;CAPZA2|1.308764545;RPL27|1.485323169;BLMH|1.469427111;UBE2V2|1.250642582;EDF1|1.274072423;HSP70|1.283172572;CAB39|1.21239245;ALDOC|1.365001997;ERP44|0.745186445;SAMM50|0.563408826;FLNB|…	31	1816	110	21280	http://www.ebi.ac.uk/QuickGO/GTerm?id=GO:0065010
3	3	extracellular vesicle	GO:1903561	1.65e-09	5.55e-08	UCH-L1|1.43716929;ACAT1|1.26178047;EIF3I|1.293629736;CILP|1.39877359;PSMD6|1.32702021;PRDX6|1.247143535;GPI|1.354148803;ATP5F1|1.373436785;CYB5R3|1.501083223;ARL8B|1.209421094;ARHGDIA|1.261342819;HSPB1|1.337774448;CAPZA2|1.308764545;RPL27|1.485323169;BLMH|1.469427111;UBE2V2|1.250642582;KPNA4|1.24977891;EDF1|1.274072423;HSP70|1.283172572;CAB39|1.21239245;ALDOC|1.365001997;ERP44|0.745186445;SAMM50|…	32	1932	110	21280	http://www.ebi.ac.uk/QuickGO/GTerm?id=GO:1903561
3	3	extracellular organelle	GO:0043230	1.69e-09	5.55e-08	UCH-L1|1.43716929;ACAT1|1.26178047;EIF3I|1.293629736;CILP|1.39877359;PSMD6|1.32702021;PRDX6|1.247143535;GPI|1.354148803;ATP5F1|1.373436785;CYB5R3|1.501083223;ARL8B|1.209421094;ARHGDIA|1.261342819;HSPB1|1.337774448;CAPZA2|1.308764545;RPL27|1.485323169;BLMH|1.469427111;UBE2V2|1.250642582;KPNA4|1.24977891;EDF1|1.274072423;HSP70|1.283172572;CAB39|1.21239245;ALDOC|1.365001997;ERP44|0.745186445;SAMM50|…	32	1934	110	21280	http://www.ebi.ac.uk/QuickGO/GTerm?id=GO:0043230
9	4,5,6,8,9	I band	GO:0031674	2.22e-09	6.57e-08	ENSGALG00000000295|1.49801844;MYOM2|1.223302409;MYPN|1.223593919;HSPB1|1.337774448;ATP2A1|1.2337889;MYBPC2|1.243510197;CAPZA2|1.308764545;ENSGALG00000027330|1.235499055;FKBP12.6|0.773369444	9	99	110	21280	http://www.ebi.ac.uk/QuickGO/GTerm?id=GO:0031674
5	4,5	cytoplasmic part	GO:0044444	8.74e-09	2.35e-07	ENO1|1.301513562;TNNT3|1.527716062;A0A3Q2U6J9|1.340342648;A0A3Q2UCH4|1.308620615;A0A3Q2UDT6|1.205693283;A0A3Q3ATJ1|1.201501275;A0A3Q3AZP2|1.434367428;UCH-L1|1.43716929;SH3BGR|1.484858486;ACAT1|1.26178047;LMOD3|1.522555731;EIF3I|1.293629736;ENSGALG00000000295|1.49801844;MYOM1|1.254881107;PRDX6|1.247143535;MOSPD1|1.300070747;PDLIM3|1.286425032;GPI|1.354148803;MYOM2|1.223302409;SDHA|1.217654696;ATP5…	63	6575	110	21280	http://www.ebi.ac.uk/QuickGO/GTerm?id=GO:0044444
10	4,5,6,7,9,10	Z disc	GO:0030018	1.8e-08	4.43e-07	ENSGALG00000000295|1.49801844;MYOM2|1.223302409;MYPN|1.223593919;HSPB1|1.337774448;MYBPC2|1.243510197;CAPZA2|1.308764545;ENSGALG00000027330|1.235499055;FKBP12.6|0.773369444	8	88	110	21280	http://www.ebi.ac.uk/QuickGO/GTerm?id=GO:0030018
2	2	extracellular region part	GO:0044421	2.38e-08	5.43e-07	UCH-L1|1.43716929;ACAT1|1.26178047;EIF3I|1.293629736;CILP|1.39877359;PSMD6|1.32702021;PRDX6|1.247143535;GPI|1.354148803;ATP5F1|1.373436785;CYB5R3|1.501083223;ARL8B|1.209421094;ARHGDIA|1.261342819;HSPB1|1.337774448;CKM|1.28135235;ALB|1.487005807;CAPZA2|1.308764545;RPL27|1.485323169;BLMH|1.469427111;UBE2V2|1.250642582;KPNA4|1.24977891;EDF1|1.274072423;HSP70|1.283172572;CAB39|1.21239245;ALDOC|1.3650…	38	2913	110	21280	http://www.ebi.ac.uk/QuickGO/GTerm?id=GO:0044421
5	5	membrane-bounded vesicle	GO:0031988	4.83e-08	1.02e-06	UCH-L1|1.43716929;ACAT1|1.26178047;EIF3I|1.293629736;CILP|1.39877359;PSMD6|1.32702021;PRDX6|1.247143535;GPI|1.354148803;ATP5F1|1.373436785;CYB5R3|1.501083223;ARL8B|1.209421094;ARHGDIA|1.261342819;HSPB1|1.337774448;CAPZA2|1.308764545;RPL27|1.485323169;BLMH|1.469427111;UBE2V2|1.250642582;EDF1|1.274072423;HSP70|1.283172572;RAB5C|2.549741805;CAB39|1.21239245;ALDOC|1.365001997;ERP44|0.745186445;SAMM50…	32	2222	110	21280	http://www.ebi.ac.uk/QuickGO/GTerm?id=GO:0031988
9	4,5,6,8,9	A band	GO:0031672	1.65e-07	3.25e-06	LMOD3|1.522555731;MYOM1|1.254881107;MYOM2|1.223302409;ATP2A1|1.2337889;MYBPC2|1.243510197	5	25	110	21280	http://www.ebi.ac.uk/QuickGO/GTerm?id=GO:0031672
4	4	vesicle	GO:0031982	3.47e-07	6.42e-06	UCH-L1|1.43716929;ACAT1|1.26178047;EIF3I|1.293629736;CILP|1.39877359;PSMD6|1.32702021;PRDX6|1.247143535;GPI|1.354148803;ATP5F1|1.373436785;CYB5R3|1.501083223;ARL8B|1.209421094;ARHGDIA|1.261342819;HSPB1|1.337774448;CAPZA2|1.308764545;RPL27|1.485323169;BLMH|1.469427111;UBE2V2|1.250642582;KPNA4|1.24977891;EDF1|1.274072423;SH3KBP1|1.234699811;HSP70|1.283172572;RAB5C|2.549741805;CAB39|1.21239245;ALDOC…	34	2680	110	21280	http://www.ebi.ac.uk/QuickGO/GTerm?id=GO:0031982
2	2	extracellular region	GO:0005576	8.62e-07	1.5e-05	UCH-L1|1.43716929;ACAT1|1.26178047;EIF3I|1.293629736;CILP|1.39877359;PSMD6|1.32702021;PRDX6|1.247143535;GPI|1.354148803;ATP5F1|1.373436785;CYB5R3|1.501083223;ARL8B|1.209421094;ARHGDIA|1.261342819;HSPB1|1.337774448;CKM|1.28135235;ALB|1.487005807;CAPZA2|1.308764545;RPL27|1.485323169;BLMH|1.469427111;UBE2V2|1.250642582;KPNA4|1.24977891;EDF1|1.274072423;HSP70|1.283172572;CAB39|1.21239245;ALDOC|1.3650…	38	3338	110	21280	http://www.ebi.ac.uk/QuickGO/GTerm?id=GO:0005576
10	4,5,6,7,9,10	M band	GO:0031430	1.96e-06	3.22e-05	LMOD3|1.522555731;MYOM1|1.254881107;MYOM2|1.223302409;MYBPC2|1.243510197	4	18	110	21280	http://www.ebi.ac.uk/QuickGO/GTerm?id=GO:0031430
2	2	supramolecular fiber	GO:0099512	8.99e-06	0.00014	TNNT3|1.527716062;LMOD3|1.522555731;MYOM1|1.254881107;MYOM2|1.223302409;MYPN|1.223593919;HSPB1|1.337774448;ENSGALG00000002907|1.322866394;TPM1|1.390357267;P13538|1.306581388;ATP2A1|1.2337889;MYBPC2|1.243510197;CAPZA2|1.308764545;ENSGALG00000027330|1.235499055;FKBP12.6|0.773369444	14	668	110	21280	http://www.ebi.ac.uk/QuickGO/GTerm?id=GO:0099512
3	3	myelin sheath	GO:0043209	1.68e-05	0.000239	UCH-L1|1.43716929;GPI|1.354148803;SDHA|1.217654696;ATP5F1|1.373436785;HSP70|1.283172572;MBP|0.690656099;MPZ|0.531735444	7	156	110	21280	http://www.ebi.ac.uk/QuickGO/GTerm?id=GO:0043209
7	6,7	actin cytoskeleton	GO:0015629	1.69e-05	0.000239	TNNT3|1.527716062;LMOD3|1.522555731;PDLIM3|1.286425032;MYOM2|1.223302409;ENSGALG00000002907|1.322866394;MYLPF|1.348959455;TPM1|1.390357267;P13538|1.306581388;MYBPC2|1.243510197;CAPZA2|1.308764545;ENSGALG00000027330|1.235499055;FLNB|0.613099367	12	523	110	21280	http://www.ebi.ac.uk/QuickGO/GTerm?id=GO:0015629
2	2	cell	GO:0005623	4.66e-05	0.000626	RYR3|1.208753681;TXNRD3|1.204580616;A0A1D5PPT0|1.203939941;ENO1|1.301513562;TNNT3|1.527716062;A0A3Q2TTX7|1.32240644;A0A3Q2U6J9|1.340342648;A0A3Q2UCH4|1.308620615;CATSPER2|1.202421769;A0A3Q2UDT6|1.205693283;A0A3Q3ATJ1|1.201501275;A0A3Q3AZP2|1.434367428;UCH-L1|1.43716929;SH3BGR|1.484858486;ACAT1|1.26178047;LMOD3|1.522555731;EIF3I|1.293629736;ENSGALG00000000295|1.49801844;PSMD6|1.32702021;MYOM1|1.25…	101	16428	110	21280	http://www.ebi.ac.uk/QuickGO/GTerm?id=GO:0005623
8	7,8	calcium channel complex	GO:0034704	5.27e-05	0.000678	A0A3Q2TTX7|1.32240644;CATSPER2|1.202421769;A0A3Q3ATJ1|1.201501275;HSP70|1.283172572;FKBP12.6|0.773369444	5	78	110	21280	http://www.ebi.ac.uk/QuickGO/GTerm?id=GO:0034704
6	5,6	cytosol	GO:0005829	7.93e-05	0.000967	ENO1|1.301513562;A0A3Q2U6J9|1.340342648;A0A3Q2UCH4|1.308620615;A0A3Q2UDT6|1.205693283;A0A3Q3AZP2|1.434367428;UCH-L1|1.43716929;SH3BGR|1.484858486;PDLIM3|1.286425032;GPI|1.354148803;RTCB|1.284666414;LDHA|1.406541698;CKM|1.28135235;ENO3|1.243593921;CAPZA2|1.308764545;RPL27|1.485323169;EDF1|1.274072423;HSP70|1.283172572;VPS29|0.751790268;SRSF5|0.613528475;MTHFD1L|0.749713642;KPNA3|0.806756534;XPNPEP…	23	1882	110	21280	http://www.ebi.ac.uk/QuickGO/GTerm?id=GO:0005829
3	3	intracellular part	GO:0044424	8.16e-05	0.000967	A0A1D5PPT0|1.203939941;ENO1|1.301513562;TNNT3|1.527716062;A0A3Q2U6J9|1.340342648;A0A3Q2UCH4|1.308620615;A0A3Q2UDT6|1.205693283;A0A3Q3ATJ1|1.201501275;A0A3Q3AZP2|1.434367428;UCH-L1|1.43716929;SH3BGR|1.484858486;ACAT1|1.26178047;LMOD3|1.522555731;EIF3I|1.293629736;ENSGALG00000000295|1.49801844;PSMD6|1.32702021;MYOM1|1.254881107;PRDX6|1.247143535;MOSPD1|1.300070747;PDLIM3|1.286425032;GPI|1.354148803…	88	13393	110	21280	http://www.ebi.ac.uk/QuickGO/GTerm?id=GO:0044424
3	3	intracellular	GO:0005622	0.0001	0.00114	A0A1D5PPT0|1.203939941;ENO1|1.301513562;TNNT3|1.527716062;A0A3Q2U6J9|1.340342648;A0A3Q2UCH4|1.308620615;A0A3Q2UDT6|1.205693283;A0A3Q3ATJ1|1.201501275;A0A3Q3AZP2|1.434367428;UCH-L1|1.43716929;SH3BGR|1.484858486;ACAT1|1.26178047;LMOD3|1.522555731;EIF3I|1.293629736;ENSGALG00000000295|1.49801844;PSMD6|1.32702021;MYOM1|1.254881107;PRDX6|1.247143535;MOSPD1|1.300070747;PDLIM3|1.286425032;GPI|1.354148803…	92	14360	110	21280	http://www.ebi.ac.uk/QuickGO/GTerm?id=GO:0005622
9	4,8,9	voltage-gated calcium channel complex	GO:0005891	0.000216	0.00237	A0A3Q2TTX7|1.32240644;CATSPER2|1.202421769;A0A3Q3ATJ1|1.201501275;HSP70|1.283172572	4	57	110	21280	http://www.ebi.ac.uk/QuickGO/GTerm?id=GO:0005891
5	5	mitochondrial inner membrane	GO:0005743	0.000548	0.00579	ACAT1|1.26178047;SDHA|1.217654696;ATP5F1|1.373436785;CYB5R3|1.501083223;TIMM13|1.33072494;COX7C|1.254685321;A0A3Q3AUQ1|0.818305002;SAMM50|0.563408826	8	358	110	21280	http://www.ebi.ac.uk/QuickGO/GTerm?id=GO:0005743
2	2	cell part	GO:0044464	0.00065	0.00664	A0A1D5PPT0|1.203939941;ENO1|1.301513562;TNNT3|1.527716062;A0A3Q2TTX7|1.32240644;A0A3Q2U6J9|1.340342648;A0A3Q2UCH4|1.308620615;CATSPER2|1.202421769;A0A3Q2UDT6|1.205693283;A0A3Q3ATJ1|1.201501275;A0A3Q3AZP2|1.434367428;UCH-L1|1.43716929;SH3BGR|1.484858486;ACAT1|1.26178047;LMOD3|1.522555731;EIF3I|1.293629736;ENSGALG00000000295|1.49801844;PSMD6|1.32702021;MYOM1|1.254881107;PRDX6|1.247143535;MOSPD1|1.3…	98	16293	110	21280	http://www.ebi.ac.uk/QuickGO/GTerm?id=GO:0044464
5	5	mitochondrial respiratory chain complex IV	GO:0005751	0.000726	0.00717	COX7C|1.254685321;A0A3Q3AUQ1|0.818305002	2	8	110	21280	http://www.ebi.ac.uk/QuickGO/GTerm?id=GO:0005751
9	5,6,8,9	striated muscle thin filament	GO:0005865	0.000847	0.00809	TNNT3|1.527716062;LMOD3|1.522555731;TPM1|1.390357267	3	36	110	21280	http://www.ebi.ac.uk/QuickGO/GTerm?id=GO:0005865
8	4,5,7,8	myofilament	GO:0036379	0.000919	0.0085	TNNT3|1.527716062;LMOD3|1.522555731;TPM1|1.390357267	3	37	110	21280	http://www.ebi.ac.uk/QuickGO/GTerm?id=GO:0036379
4	4	myosin complex	GO:0016459	0.00107	0.00958	MYOM2|1.223302409;ENSGALG00000002907|1.322866394;MYLPF|1.348959455;P13538|1.306581388;MYBPC2|1.243510197	5	149	110	21280	http://www.ebi.ac.uk/QuickGO/GTerm?id=GO:0016459
4	4	organelle inner membrane	GO:0019866	0.00116	0.00981	ACAT1|1.26178047;SDHA|1.217654696;ATP5F1|1.373436785;CYB5R3|1.501083223;TIMM13|1.33072494;COX7C|1.254685321;A0A3Q3AUQ1|0.818305002;SAMM50|0.563408826	8	402	110	21280	http://www.ebi.ac.uk/QuickGO/GTerm?id=GO:0019866
4	4	respiratory chain complex IV	GO:0045277	0.00116	0.00981	COX7C|1.254685321;A0A3Q3AUQ1|0.818305002	2	10	110	21280	http://www.ebi.ac.uk/QuickGO/GTerm?id=GO:0045277
6	5,6	sarcoplasmic reticulum	GO:0016529	0.00124	0.0102	A0A3Q3ATJ1|1.201501275;ATP2A1|1.2337889;FKBP12.6|0.773369444	3	41	110	21280	http://www.ebi.ac.uk/QuickGO/GTerm?id=GO:0016529
6	4,5,6	muscle myosin complex	GO:0005859	0.00169	0.0135	MYOM2|1.223302409;MYBPC2|1.243510197	2	12	110	21280	http://www.ebi.ac.uk/QuickGO/GTerm?id=GO:0005859
5	5	sarcoplasm	GO:0016528	0.00185	0.0143	A0A3Q3ATJ1|1.201501275;ATP2A1|1.2337889;FKBP12.6|0.773369444	3	47	110	21280	http://www.ebi.ac.uk/QuickGO/GTerm?id=GO:0016528
2	2	organelle part	GO:0044422	0.00188	0.0143	TNNT3|1.527716062;A0A3Q3AZP2|1.434367428;UCH-L1|1.43716929;ACAT1|1.26178047;LMOD3|1.522555731;ENSGALG00000000295|1.49801844;MYOM1|1.254881107;GPI|1.354148803;MYOM2|1.223302409;SDHA|1.217654696;ATP5F1|1.373436785;RTCB|1.284666414;CYB5R3|1.501083223;ARL8B|1.209421094;MYPN|1.223593919;HSPB1|1.337774448;ENSGALG00000002907|1.322866394;MYLPF|1.348959455;TPM1|1.390357267;P13538|1.306581388;ATP2A1|1.2337…	51	6954	110	21280	http://www.ebi.ac.uk/QuickGO/GTerm?id=GO:0044422
6	5,6	endoplasmic reticulum-Golgi intermediate compartment	GO:0005793	0.00196	0.0145	ATP2A1|1.2337889;A0A3Q2U769|0.584188784;ERP44|0.745186445	3	48	110	21280	http://www.ebi.ac.uk/QuickGO/GTerm?id=GO:0005793
5	5	myosin filament	GO:0032982	0.00266	0.0192	P13538|1.306581388;MYBPC2|1.243510197	2	15	110	21280	http://www.ebi.ac.uk/QuickGO/GTerm?id=GO:0032982
2	2	organelle	GO:0043226	0.003	0.0209	A0A1D5PPT0|1.203939941;TNNT3|1.527716062;A0A3Q2U6J9|1.340342648;A0A3Q3ATJ1|1.201501275;A0A3Q3AZP2|1.434367428;UCH-L1|1.43716929;ACAT1|1.26178047;LMOD3|1.522555731;EIF3I|1.293629736;ENSGALG00000000295|1.49801844;CILP|1.39877359;PSMD6|1.32702021;MYOM1|1.254881107;PRDX6|1.247143535;MOSPD1|1.300070747;PDLIM3|1.286425032;GPI|1.354148803;MYOM2|1.223302409;SDHA|1.217654696;ATP5F1|1.373436785;NPEPL1|1.25…	78	12293	110	21280	http://www.ebi.ac.uk/QuickGO/GTerm?id=GO:0043226
5	5	myosin II complex	GO:0016460	0.00303	0.0209	MYOM2|1.223302409;MYBPC2|1.243510197	2	16	110	21280	http://www.ebi.ac.uk/QuickGO/GTerm?id=GO:0016460
2	2	macromolecular complex	GO:0032991	0.00344	0.0231	ENO1|1.301513562;TNNT3|1.527716062;A0A3Q2TTX7|1.32240644;A0A3Q2UCH4|1.308620615;CATSPER2|1.202421769;A0A3Q3ATJ1|1.201501275;EIF3I|1.293629736;PSMD6|1.32702021;MYOM2|1.223302409;ATP5F1|1.373436785;EEF1B2|1.322594905;RTCB|1.284666414;ENSGALG00000002907|1.322866394;MYLPF|1.348959455;ENO3|1.243593921;P13538|1.306581388;MYBPC2|1.243510197;ALB|1.487005807;CAPZA2|1.308764545;RPL27|1.485323169;UBE2V2|1.2…	42	5545	110	21280	http://www.ebi.ac.uk/QuickGO/GTerm?id=GO:0032991
8	5,6,7,8	phosphopyruvate hydratase complex	GO:0000015	0.00384	0.0252	ENO1|1.301513562;ENO3|1.243593921	2	18	110	21280	http://www.ebi.ac.uk/QuickGO/GTerm?id=GO:0000015
7	4,6,7	mitochondrial membrane	GO:0031966	0.00404	0.026	ACAT1|1.26178047;SDHA|1.217654696;ATP5F1|1.373436785;CYB5R3|1.501083223;TIMM13|1.33072494;COX7C|1.254685321;A0A3Q3AUQ1|0.818305002;SAMM50|0.563408826	8	492	110	21280	http://www.ebi.ac.uk/QuickGO/GTerm?id=GO:0031966
4	4	cytochrome complex	GO:0070069	0.00428	0.0269	COX7C|1.254685321;A0A3Q3AUQ1|0.818305002	2	19	110	21280	http://www.ebi.ac.uk/QuickGO/GTerm?id=GO:0070069
3	3	organelle membrane	GO:0031090	0.00506	0.03	ACAT1|1.26178047;GPI|1.354148803;SDHA|1.217654696;ATP5F1|1.373436785;RTCB|1.284666414;CYB5R3|1.501083223;ARL8B|1.209421094;ATP2A1|1.2337889;RAB5C|2.549741805;TIMM13|1.33072494;COX7C|1.254685321;A0A3Q3AUQ1|0.818305002;ERP44|0.745186445;SAMM50|0.563408826;LOC100859860|0.744437258;FKBP12.6|0.773369444;GLIPR2|0.785712158;ORMDL3|0.402916918	18	1804	110	21280	http://www.ebi.ac.uk/QuickGO/GTerm?id=GO:0031090
10	4,5,6,7,9,10	H zone	GO:0031673	0.00517	0.03	ATP2A1|1.2337889	1	1	110	21280	http://www.ebi.ac.uk/QuickGO/GTerm?id=GO:0031673
5	5	mitochondrial sorting and assembly machinery complex	GO:0001401	0.00517	0.03	SAMM50|0.563408826	1	1	110	21280	http://www.ebi.ac.uk/QuickGO/GTerm?id=GO:0001401
5	3,4,5	spine apparatus	GO:0097444	0.00517	0.03	ENSGALG00000027330|1.235499055	1	1	110	21280	http://www.ebi.ac.uk/QuickGO/GTerm?id=GO:0097444
6	5,6	mitochondrial envelope	GO:0005740	0.006	0.0341	ACAT1|1.26178047;SDHA|1.217654696;ATP5F1|1.373436785;CYB5R3|1.501083223;TIMM13|1.33072494;COX7C|1.254685321;A0A3Q3AUQ1|0.818305002;SAMM50|0.563408826	8	526	110	21280	http://www.ebi.ac.uk/QuickGO/GTerm?id=GO:0005740
4	4	mitochondrial protein complex	GO:0098798	0.0062	0.0346	ATP5F1|1.373436785;COX7C|1.254685321;A0A3Q3AUQ1|0.818305002;SAMM50|0.563408826	4	141	110	21280	http://www.ebi.ac.uk/QuickGO/GTerm?id=GO:0098798
5	4,5	sarcoplasmic reticulum membrane	GO:0033017	0.00679	0.0371	ATP2A1|1.2337889;FKBP12.6|0.773369444	2	24	110	21280	http://www.ebi.ac.uk/QuickGO/GTerm?id=GO:0033017
7	6,7	cation channel complex	GO:0034703	0.0069	0.0371	A0A3Q2TTX7|1.32240644;CATSPER2|1.202421769;A0A3Q3ATJ1|1.201501275;HSP70|1.283172572;FKBP12.6|0.773369444	5	230	110	21280	http://www.ebi.ac.uk/QuickGO/GTerm?id=GO:0034703
5	4,5	intracellular non-membrane-bounded organelle	GO:0043232	0.0091	0.0466	TNNT3|1.527716062;LMOD3|1.522555731;ENSGALG00000000295|1.49801844;MYOM1|1.254881107;PDLIM3|1.286425032;MYOM2|1.223302409;SDHA|1.217654696;CYB5R3|1.501083223;ARL8B|1.209421094;MYPN|1.223593919;HSPB1|1.337774448;ENSGALG00000002907|1.322866394;MYLPF|1.348959455;TPM1|1.390357267;P13538|1.306581388;ATP2A1|1.2337889;MYBPC2|1.243510197;CAPZA2|1.308764545;RPL27|1.485323169;RANBP1|1.340088175;EDF1|1.27407…	31	3959	110	21280	http://www.ebi.ac.uk/QuickGO/GTerm?id=GO:0043232
3	3	non-membrane-bounded organelle	GO:0043228	0.0091	0.0466	TNNT3|1.527716062;LMOD3|1.522555731;ENSGALG00000000295|1.49801844;MYOM1|1.254881107;PDLIM3|1.286425032;MYOM2|1.223302409;SDHA|1.217654696;CYB5R3|1.501083223;ARL8B|1.209421094;MYPN|1.223593919;HSPB1|1.337774448;ENSGALG00000002907|1.322866394;MYLPF|1.348959455;TPM1|1.390357267;P13538|1.306581388;ATP2A1|1.2337889;MYBPC2|1.243510197;CAPZA2|1.308764545;RPL27|1.485323169;RANBP1|1.340088175;EDF1|1.27407…	31	3959	110	21280	http://www.ebi.ac.uk/QuickGO/GTerm?id=GO:0043228
5	4,5	mitochondrial part	GO:0044429	0.00914	0.0466	ACAT1|1.26178047;SDHA|1.217654696;ATP5F1|1.373436785;CYB5R3|1.501083223;TIMM13|1.33072494;COX7C|1.254685321;A0A3Q3AUQ1|0.818305002;SAMM50|0.563408826;GLRX5|0.502973712	9	685	110	21280	http://www.ebi.ac.uk/QuickGO/GTerm?id=GO:0044429
4	4	transporter complex	GO:1990351	0.00934	0.0469	A0A3Q2TTX7|1.32240644;CATSPER2|1.202421769;A0A3Q3ATJ1|1.201501275;HSP70|1.283172572;TIMM13|1.33072494;FKBP12.6|0.773369444	6	347	110	21280	http://www.ebi.ac.uk/QuickGO/GTerm?id=GO:1990351
6	4,5,6	endoplasmic reticulum	GO:0005783	0.00981	0.0484	A0A3Q2U6J9|1.340342648;A0A3Q3ATJ1|1.201501275;EEF1B2|1.322594905;RTCB|1.284666414;CYB5R3|1.501083223;ATP2A1|1.2337889;BCAP31|0.807755804;A0A3Q2U769|0.584188784;ERP44|0.745186445;LOC100859860|0.744437258;FKBP12.6|0.773369444;ORMDL3|0.402916918	12	1078	110	21280	http://www.ebi.ac.uk/QuickGO/GTerm?id=GO:0005783
6	5,6	internode region of axon	GO:0033269	0.0103	0.0492	MBP|0.690656099	1	2	110	21280	http://www.ebi.ac.uk/QuickGO/GTerm?id=GO:0033269
5	5	UBC13-MMS2 complex	GO:0031372	0.0103	0.0492	UBE2V2|1.250642582	1	2	110	21280	http://www.ebi.ac.uk/QuickGO/GTerm?id=GO:0031372
4	3,4	intracellular organelle part	GO:0044446	0.0106	0.0498	TNNT3|1.527716062;A0A3Q3AZP2|1.434367428;UCH-L1|1.43716929;ACAT1|1.26178047;LMOD3|1.522555731;GPI|1.354148803;MYOM2|1.223302409;SDHA|1.217654696;ATP5F1|1.373436785;RTCB|1.284666414;CYB5R3|1.501083223;ARL8B|1.209421094;ENSGALG00000002907|1.322866394;MYLPF|1.348959455;TPM1|1.390357267;P13538|1.306581388;ATP2A1|1.2337889;MYBPC2|1.243510197;CAPZA2|1.308764545;RPL27|1.485323169;BLMH|1.469427111;RANBP1…	47	6781	110	21280	http://www.ebi.ac.uk/QuickGO/GTerm?id=GO:0044446
3	3	membrane-bounded organelle	GO:0043227	0.0116	0.0538	A0A1D5PPT0|1.203939941;A0A3Q2U6J9|1.340342648;A0A3Q3ATJ1|1.201501275;A0A3Q3AZP2|1.434367428;UCH-L1|1.43716929;ACAT1|1.26178047;EIF3I|1.293629736;ENSGALG00000000295|1.49801844;CILP|1.39877359;PSMD6|1.32702021;PRDX6|1.247143535;MOSPD1|1.300070747;GPI|1.354148803;MYOM2|1.223302409;SDHA|1.217654696;ATP5F1|1.373436785;NPEPL1|1.259782993;EEF1B2|1.322594905;RTCB|1.284666414;CYB5R3|1.501083223;ARL8B|1.20…	67	10575	110	21280	http://www.ebi.ac.uk/QuickGO/GTerm?id=GO:0043227
5	4,5	organelle envelope	GO:0031967	0.0121	0.0546	ACAT1|1.26178047;SDHA|1.217654696;ATP5F1|1.373436785;RTCB|1.284666414;CYB5R3|1.501083223;TIMM13|1.33072494;COX7C|1.254685321;A0A3Q3AUQ1|0.818305002;SAMM50|0.563408826;KPNA3|0.806756534	10	844	110	21280	http://www.ebi.ac.uk/QuickGO/GTerm?id=GO:0031967
3	3	envelope	GO:0031975	0.0122	0.0546	ACAT1|1.26178047;SDHA|1.217654696;ATP5F1|1.373436785;RTCB|1.284666414;CYB5R3|1.501083223;TIMM13|1.33072494;COX7C|1.254685321;A0A3Q3AUQ1|0.818305002;SAMM50|0.563408826;KPNA3|0.806756534	10	845	110	21280	http://www.ebi.ac.uk/QuickGO/GTerm?id=GO:0031975
3	3	extracellular space	GO:0005615	0.0134	0.059	CILP|1.39877359;PRDX6|1.247143535;GPI|1.354148803;HSPB1|1.337774448;CKM|1.28135235;ALB|1.487005807;HSP70|1.283172572;NID2|0.740439165;LAMA4|0.797937472;FGB|0.807555904;ogchi|0.611712077	11	989	110	21280	http://www.ebi.ac.uk/QuickGO/GTerm?id=GO:0005615
3	3	protein complex	GO:0043234	0.0153	0.0626	TNNT3|1.527716062;EIF3I|1.293629736;PSMD6|1.32702021;MYOM2|1.223302409;ATP5F1|1.373436785;EEF1B2|1.322594905;RTCB|1.284666414;ENSGALG00000002907|1.322866394;MYLPF|1.348959455;ENO3|1.243593921;P13538|1.306581388;MYBPC2|1.243510197;ALB|1.487005807;CAPZA2|1.308764545;UBE2V2|1.250642582;EDF1|1.274072423;HSP70|1.283172572;TIMM13|1.33072494;COX7C|1.254685321;VPS29|0.751790268;COPS7B|0.663774909;SAMM50|…	34	4618	110	21280	http://www.ebi.ac.uk/QuickGO/GTerm?id=GO:0043234
3	3	mitochondrial membrane part	GO:0044455	0.0154	0.0626	ATP5F1|1.373436785;COX7C|1.254685321;A0A3Q3AUQ1|0.818305002;SAMM50|0.563408826	4	184	110	21280	http://www.ebi.ac.uk/QuickGO/GTerm?id=GO:0044455
9	5,9	SPOTS complex	GO:0035339	0.0154	0.0626	ORMDL3|0.402916918	1	3	110	21280	http://www.ebi.ac.uk/QuickGO/GTerm?id=GO:0035339
6	5,6	yolk	GO:0060417	0.0154	0.0626	ALB|1.487005807	1	3	110	21280	http://www.ebi.ac.uk/QuickGO/GTerm?id=GO:0060417
10	5,9,10	CatSper complex	GO:0036128	0.0154	0.0626	HSP70|1.283172572	1	3	110	21280	http://www.ebi.ac.uk/QuickGO/GTerm?id=GO:0036128
8	5,6,7,8	mitochondrial intermembrane space protein transporter complex	GO:0042719	0.0154	0.0626	TIMM13|1.33072494	1	3	110	21280	http://www.ebi.ac.uk/QuickGO/GTerm?id=GO:0042719
3	3	extracellular matrix component	GO:0044420	0.0199	0.0797	NID2|0.740439165;LAMA4|0.797937472;COL1A2|0.584695563	3	111	110	21280	http://www.ebi.ac.uk/QuickGO/GTerm?id=GO:0044420
7	6,7	terminal cisterna	GO:0014802	0.0205	0.081	FKBP12.6|0.773369444	1	4	110	21280	http://www.ebi.ac.uk/QuickGO/GTerm?id=GO:0014802
4	4	adherens junction	GO:0005912	0.022	0.0855	HSPB1|1.337774448;RPL27|1.485323169;HSP70|1.283172572;FLNB|0.613099367;GYPC|0.786106154;PPP1CB|0.799006051	6	420	110	21280	http://www.ebi.ac.uk/QuickGO/GTerm?id=GO:0005912
4	4	inner mitochondrial membrane protein complex	GO:0098800	0.0223	0.0859	ATP5F1|1.373436785;COX7C|1.254685321;A0A3Q3AUQ1|0.818305002	3	116	110	21280	http://www.ebi.ac.uk/QuickGO/GTerm?id=GO:0098800
3	3	anchoring junction	GO:0070161	0.0238	0.0904	HSPB1|1.337774448;RPL27|1.485323169;HSP70|1.283172572;FLNB|0.613099367;GYPC|0.786106154;PPP1CB|0.799006051	6	428	110	21280	http://www.ebi.ac.uk/QuickGO/GTerm?id=GO:0070161
6	5,6	ion channel complex	GO:0034702	0.0242	0.0907	A0A3Q2TTX7|1.32240644;CATSPER2|1.202421769;A0A3Q3ATJ1|1.201501275;HSP70|1.283172572;FKBP12.6|0.773369444	5	316	110	21280	http://www.ebi.ac.uk/QuickGO/GTerm?id=GO:0034702
10	4,5,6,7,9,10	muscle thin filament tropomyosin	GO:0005862	0.0256	0.0923	TPM1|1.390357267	1	5	110	21280	http://www.ebi.ac.uk/QuickGO/GTerm?id=GO:0005862
7	4,7	PTW/PP1 phosphatase complex	GO:0072357	0.0256	0.0923	PPP1CB|0.799006051	1	5	110	21280	http://www.ebi.ac.uk/QuickGO/GTerm?id=GO:0072357
4	4	eukaryotic translation elongation factor 1 complex	GO:0005853	0.0256	0.0923	EEF1B2|1.322594905	1	5	110	21280	http://www.ebi.ac.uk/QuickGO/GTerm?id=GO:0005853
9	6,7,8,9	MLL5-L complex	GO:0070688	0.0306	0.109	PPP1CB|0.799006051	1	6	110	21280	http://www.ebi.ac.uk/QuickGO/GTerm?id=GO:0070688
5	4,5	transmembrane transporter complex	GO:1902495	0.0325	0.113	A0A3Q2TTX7|1.32240644;CATSPER2|1.202421769;A0A3Q3ATJ1|1.201501275;HSP70|1.283172572;FKBP12.6|0.773369444	5	342	110	21280	http://www.ebi.ac.uk/QuickGO/GTerm?id=GO:1902495
6	5,6	focal adhesion	GO:0005925	0.0325	0.113	HSPB1|1.337774448;RPL27|1.485323169;HSP70|1.283172572;FLNB|0.613099367;PPP1CB|0.799006051	5	342	110	21280	http://www.ebi.ac.uk/QuickGO/GTerm?id=GO:0005925
4	3,4	intracellular organelle	GO:0043229	0.0331	0.114	A0A1D5PPT0|1.203939941;TNNT3|1.527716062;A0A3Q2U6J9|1.340342648;A0A3Q3ATJ1|1.201501275;A0A3Q3AZP2|1.434367428;UCH-L1|1.43716929;ACAT1|1.26178047;LMOD3|1.522555731;ENSGALG00000000295|1.49801844;MYOM1|1.254881107;PRDX6|1.247143535;MOSPD1|1.300070747;PDLIM3|1.286425032;GPI|1.354148803;MYOM2|1.223302409;SDHA|1.217654696;ATP5F1|1.373436785;NPEPL1|1.259782993;EEF1B2|1.322594905;RTCB|1.284666414;CYB5R3|…	69	11407	110	21280	http://www.ebi.ac.uk/QuickGO/GTerm?id=GO:0043229
5	4,5	cell-substrate adherens junction	GO:0005924	0.0339	0.115	HSPB1|1.337774448;RPL27|1.485323169;HSP70|1.283172572;FLNB|0.613099367;PPP1CB|0.799006051	5	346	110	21280	http://www.ebi.ac.uk/QuickGO/GTerm?id=GO:0005924
3	3	cell-substrate junction	GO:0030055	0.0353	0.115	HSPB1|1.337774448;RPL27|1.485323169;HSP70|1.283172572;FLNB|0.613099367;PPP1CB|0.799006051	5	350	110	21280	http://www.ebi.ac.uk/QuickGO/GTerm?id=GO:0030055
5	4,5	banded collagen fibril	GO:0098643	0.0356	0.115	COL1A2|0.584695563	1	7	110	21280	http://www.ebi.ac.uk/QuickGO/GTerm?id=GO:0098643
4	4	fibrillar collagen trimer	GO:0005583	0.0356	0.115	COL1A2|0.584695563	1	7	110	21280	http://www.ebi.ac.uk/QuickGO/GTerm?id=GO:0005583
5	5	L-type voltage-gated calcium channel complex	GO:1990454	0.0356	0.115	A0A3Q3ATJ1|1.201501275	1	7	110	21280	http://www.ebi.ac.uk/QuickGO/GTerm?id=GO:1990454
4	4	ubiquitin conjugating enzyme complex	GO:0031371	0.0356	0.115	UBE2V2|1.250642582	1	7	110	21280	http://www.ebi.ac.uk/QuickGO/GTerm?id=GO:0031371
4	4	brush border	GO:0005903	0.0374	0.119	CAPZA2|1.308764545;FLNB|0.613099367	2	59	110	21280	http://www.ebi.ac.uk/QuickGO/GTerm?id=GO:0005903
6	5,6	mitochondrial proton-transporting ATP synthase complex, coupling factor F(o)	GO:0000276	0.0406	0.124	ATP5F1|1.373436785	1	8	110	21280	http://www.ebi.ac.uk/QuickGO/GTerm?id=GO:0000276
5	5	eukaryotic translation initiation factor 3 complex, eIF3m	GO:0071541	0.0406	0.124	EIF3I|1.293629736	1	8	110	21280	http://www.ebi.ac.uk/QuickGO/GTerm?id=GO:0071541
7	3,7	endoplasmic reticulum palmitoyltransferase complex	GO:0031211	0.0406	0.124	ORMDL3|0.402916918	1	8	110	21280	http://www.ebi.ac.uk/QuickGO/GTerm?id=GO:0031211
8	4,8	serine C-palmitoyltransferase complex	GO:0017059	0.0406	0.124	ORMDL3|0.402916918	1	8	110	21280	http://www.ebi.ac.uk/QuickGO/GTerm?id=GO:0017059
10	6,7,8,9,10	stress fiber	GO:0001725	0.041	0.124	ENSGALG00000027330|1.235499055;FLNB|0.613099367	2	62	110	21280	http://www.ebi.ac.uk/QuickGO/GTerm?id=GO:0001725
4	3,4	membrane protein complex	GO:0098796	0.0436	0.13	A0A3Q2TTX7|1.32240644;CATSPER2|1.202421769;A0A3Q3ATJ1|1.201501275;ATP5F1|1.373436785;HSP70|1.283172572;COX7C|1.254685321;VPS29|0.751790268;A0A3Q3AUQ1|0.818305002;SAMM50|0.563408826;FKBP12.6|0.773369444;ORMDL3|0.402916918	11	1189	110	21280	http://www.ebi.ac.uk/QuickGO/GTerm?id=GO:0098796
5	4,5	respiratory chain complex	GO:0098803	0.0446	0.131	COX7C|1.254685321;A0A3Q3AUQ1|0.818305002	2	65	110	21280	http://www.ebi.ac.uk/QuickGO/GTerm?id=GO:0098803
3	3	extracellular matrix	GO:0031012	0.0447	0.131	CILP|1.39877359;HSPB1|1.337774448;NID2|0.740439165;LAMA4|0.797937472;FBLN2|0.537261949;COL1A2|0.584695563	6	498	110	21280	http://www.ebi.ac.uk/QuickGO/GTerm?id=GO:0031012
4	4	tRNA-splicing ligase complex	GO:0072669	0.0456	0.132	RTCB|1.284666414	1	9	110	21280	http://www.ebi.ac.uk/QuickGO/GTerm?id=GO:0072669
6	5,6	mitochondrion	GO:0005739	0.0466	0.134	ACAT1|1.26178047;MYOM2|1.223302409;SDHA|1.217654696;ATP5F1|1.373436785;CYB5R3|1.501083223;HSP70|1.283172572;TIMM13|1.33072494;COX7C|1.254685321;ALDOC|1.365001997;A0A3Q3AUQ1|0.818305002;SAMM50|0.563408826;MTHFD1L|0.749713642;GLRX5|0.502973712	13	1504	110	21280	http://www.ebi.ac.uk/QuickGO/GTerm?id=GO:0005739
8	5,6,7,8	actin filament bundle	GO:0032432	0.0471	0.134	ENSGALG00000027330|1.235499055;FLNB|0.613099367	2	67	110	21280	http://www.ebi.ac.uk/QuickGO/GTerm?id=GO:0032432
4	4	mitochondrial respiratory chain	GO:0005746	0.0484	0.136	COX7C|1.254685321;A0A3Q3AUQ1|0.818305002	2	68	110	21280	http://www.ebi.ac.uk/QuickGO/GTerm?id=GO:0005746
4	4	outer mitochondrial membrane protein complex	GO:0098799	0.0505	0.137	SAMM50|0.563408826	1	10	110	21280	http://www.ebi.ac.uk/QuickGO/GTerm?id=GO:0098799
4	3,4	compact myelin	GO:0043218	0.0505	0.137	MBP|0.690656099	1	10	110	21280	http://www.ebi.ac.uk/QuickGO/GTerm?id=GO:0043218
6	6	palmitoyltransferase complex	GO:0002178	0.0505	0.137	ORMDL3|0.402916918	1	10	110	21280	http://www.ebi.ac.uk/QuickGO/GTerm?id=GO:0002178
6	6	Cul2-RING ubiquitin ligase complex	GO:0031462	0.0505	0.137	CUL2|0.771088233	1	10	110	21280	http://www.ebi.ac.uk/QuickGO/GTerm?id=GO:0031462
4	4	nucleosome	GO:0000786	0.0522	0.141	P08286|0.677683947;HP1BP3|0.72359077	2	71	110	21280	http://www.ebi.ac.uk/QuickGO/GTerm?id=GO:0000786
8	5,6,7,8	actomyosin	GO:0042641	0.0536	0.143	ENSGALG00000027330|1.235499055;FLNB|0.613099367	2	72	110	21280	http://www.ebi.ac.uk/QuickGO/GTerm?id=GO:0042641
4	4	bounding membrane of organelle	GO:0098588	0.0547	0.144	GPI|1.354148803;RTCB|1.284666414;ARL8B|1.209421094;ATP2A1|1.2337889;RAB5C|2.549741805;ERP44|0.745186445;SAMM50|0.563408826;LOC100859860|0.744437258;FKBP12.6|0.773369444;GLIPR2|0.785712158;ORMDL3|0.402916918	11	1236	110	21280	http://www.ebi.ac.uk/QuickGO/GTerm?id=GO:0098588
8	7,8	male germ cell nucleus	GO:0001673	0.0554	0.144	HSP70|1.283172572	1	11	110	21280	http://www.ebi.ac.uk/QuickGO/GTerm?id=GO:0001673
4	3,4	fibrinogen complex	GO:0005577	0.0554	0.144	FGB|0.807555904	1	11	110	21280	http://www.ebi.ac.uk/QuickGO/GTerm?id=GO:0005577
7	6,7	cortical cytoskeleton	GO:0030863	0.0603	0.153	CAPZA2|1.308764545;GYPC|0.786106154	2	77	110	21280	http://www.ebi.ac.uk/QuickGO/GTerm?id=GO:0030863
5	5	mitochondrial proton-transporting ATP synthase complex	GO:0005753	0.0603	0.153	ATP5F1|1.373436785	1	12	110	21280	http://www.ebi.ac.uk/QuickGO/GTerm?id=GO:0005753
4	4	Prp19 complex	GO:0000974	0.0603	0.153	HSP70|1.283172572	1	12	110	21280	http://www.ebi.ac.uk/QuickGO/GTerm?id=GO:0000974
6	5,6	endoplasmic reticulum subcompartment	GO:0098827	0.0628	0.157	RTCB|1.284666414;ATP2A1|1.2337889;ERP44|0.745186445;FKBP12.6|0.773369444;ORMDL3|0.402916918	5	412	110	21280	http://www.ebi.ac.uk/QuickGO/GTerm?id=GO:0098827
4	4	nucleotide-activated protein kinase complex	GO:0031588	0.0652	0.162	PRKAB2|0.71569607	1	13	110	21280	http://www.ebi.ac.uk/QuickGO/GTerm?id=GO:0031588
3	3	DNA packaging complex	GO:0044815	0.0659	0.163	P08286|0.677683947;HP1BP3|0.72359077	2	81	110	21280	http://www.ebi.ac.uk/QuickGO/GTerm?id=GO:0044815
3	3	respiratory chain	GO:0070469	0.0688	0.168	COX7C|1.254685321;A0A3Q3AUQ1|0.818305002	2	83	110	21280	http://www.ebi.ac.uk/QuickGO/GTerm?id=GO:0070469
4	3,4	complex of collagen trimers	GO:0098644	0.07	0.168	COL1A2|0.584695563	1	14	110	21280	http://www.ebi.ac.uk/QuickGO/GTerm?id=GO:0098644
7	6,7	germ cell nucleus	GO:0043073	0.07	0.168	HSP70|1.283172572	1	14	110	21280	http://www.ebi.ac.uk/QuickGO/GTerm?id=GO:0043073
4	4	axon part	GO:0033267	0.0717	0.17	HSPB1|1.337774448;MBP|0.690656099	2	85	110	21280	http://www.ebi.ac.uk/QuickGO/GTerm?id=GO:0033267
7	4,5,6,7	cytoskeletal part	GO:0044430	0.0717	0.17	TNNT3|1.527716062;LMOD3|1.522555731;MYOM2|1.223302409;ARL8B|1.209421094;ENSGALG00000002907|1.322866394;MYLPF|1.348959455;TPM1|1.390357267;P13538|1.306581388;MYBPC2|1.243510197;CAPZA2|1.308764545;RANBP1|1.340088175;ENSGALG00000027330|1.235499055;FLNB|0.613099367	13	1609	110	21280	http://www.ebi.ac.uk/QuickGO/GTerm?id=GO:0044430
4	4	neuronal cell body	GO:0043025	0.0748	0.173	UCH-L1|1.43716929;HSP70|1.283172572;MBP|0.690656099	3	189	110	21280	http://www.ebi.ac.uk/QuickGO/GTerm?id=GO:0043025
4	4	proton-transporting ATP synthase complex, coupling factor F(o)	GO:0045263	0.0748	0.173	ATP5F1|1.373436785	1	15	110	21280	http://www.ebi.ac.uk/QuickGO/GTerm?id=GO:0045263
5	5	axon cytoplasm	GO:1904115	0.0748	0.173	HSPB1|1.337774448	1	15	110	21280	http://www.ebi.ac.uk/QuickGO/GTerm?id=GO:1904115
4	4	F-actin capping protein complex	GO:0008290	0.0796	0.183	CAPZA2|1.308764545	1	16	110	21280	http://www.ebi.ac.uk/QuickGO/GTerm?id=GO:0008290
5	5	transferase complex	GO:1990234	0.0802	0.183	EDF1|1.274072423;HSP70|1.283172572;CUL2|0.771088233;PPP1CB|0.799006051;PRKAB2|0.71569607;Rchy1|0.707606765;ORMDL3|0.402916918	7	721	110	21280	http://www.ebi.ac.uk/QuickGO/GTerm?id=GO:1990234
4	4	basement membrane	GO:0005604	0.0821	0.186	NID2|0.740439165;LAMA4|0.797937472	2	92	110	21280	http://www.ebi.ac.uk/QuickGO/GTerm?id=GO:0005604
4	4	somatodendritic compartment	GO:0036477	0.0897	0.201	UCH-L1|1.43716929;HSP70|1.283172572;ENSGALG00000027330|1.235499055;MBP|0.690656099	4	327	110	21280	http://www.ebi.ac.uk/QuickGO/GTerm?id=GO:0036477
7	6,7	endocytic vesicle	GO:0030139	0.0946	0.211	SH3KBP1|1.234699811;RAB5C|2.549741805	2	100	110	21280	http://www.ebi.ac.uk/QuickGO/GTerm?id=GO:0030139
3	3	chaperone complex	GO:0101031	0.0985	0.216	A0A3Q2UCH4|1.308620615	1	20	110	21280	http://www.ebi.ac.uk/QuickGO/GTerm?id=GO:0101031
False	obselete	synaptonemal complex	GO:0000795	0.0985	0.216	HSP70|1.283172572	1	20	110	21280	http://www.ebi.ac.uk/QuickGO/GTerm?id=GO:0000795
6	5,6	perinuclear region of cytoplasm	GO:0048471	0.0999	0.217	PRDX6|1.247143535;MOSPD1|1.300070747;ATP2A1|1.2337889;LOC100859860|0.744437258	4	340	110	21280	http://www.ebi.ac.uk/QuickGO/GTerm?id=GO:0048471
6	5,6	cytoskeleton	GO:0005856	0.101	0.218	TNNT3|1.527716062;LMOD3|1.522555731;PDLIM3|1.286425032;MYOM2|1.223302409;ARL8B|1.209421094;ENSGALG00000002907|1.322866394;MYLPF|1.348959455;TPM1|1.390357267;P13538|1.306581388;MYBPC2|1.243510197;CAPZA2|1.308764545;RANBP1|1.340088175;ENSGALG00000027330|1.235499055;FLNB|0.613099367;GYPC|0.786106154	15	2032	110	21280	http://www.ebi.ac.uk/QuickGO/GTerm?id=GO:0005856
4	4	troponin complex	GO:0005861	0.103	0.221	TNNT3|1.527716062	1	21	110	21280	http://www.ebi.ac.uk/QuickGO/GTerm?id=GO:0005861
5	5	axon	GO:0030424	0.11	0.234	UCH-L1|1.43716929;HSPB1|1.337774448;MBP|0.690656099	3	224	110	21280	http://www.ebi.ac.uk/QuickGO/GTerm?id=GO:0030424
3	3	cell body	GO:0044297	0.116	0.242	UCH-L1|1.43716929;HSP70|1.283172572;MBP|0.690656099	3	229	110	21280	http://www.ebi.ac.uk/QuickGO/GTerm?id=GO:0044297
4	4	catalytic complex	GO:1902494	0.117	0.242	ENO1|1.301513562;ENO3|1.243593921;EDF1|1.274072423;HSP70|1.283172572;CUL2|0.771088233;PPP1CB|0.799006051;PRKAB2|0.71569607;Rchy1|0.707606765;ORMDL3|0.402916918	9	1102	110	21280	http://www.ebi.ac.uk/QuickGO/GTerm?id=GO:1902494
9	5,6,7,8,9	spindle midzone	GO:0051233	0.117	0.242	ARL8B|1.209421094	1	24	110	21280	http://www.ebi.ac.uk/QuickGO/GTerm?id=GO:0051233
4	4	T-tubule	GO:0030315	0.117	0.242	A0A3Q3ATJ1|1.201501275	1	24	110	21280	http://www.ebi.ac.uk/QuickGO/GTerm?id=GO:0030315
7	5,6,7	cytosolic part	GO:0044445	0.121	0.245	ENO1|1.301513562;ENO3|1.243593921;RPL27|1.485323169	3	234	110	21280	http://www.ebi.ac.uk/QuickGO/GTerm?id=GO:0044445
4	4	immunological synapse	GO:0001772	0.122	0.245	ARHGDIA|1.261342819	1	25	110	21280	http://www.ebi.ac.uk/QuickGO/GTerm?id=GO:0001772
5	4,5	basal lamina	GO:0005605	0.122	0.245	LAMA4|0.797937472	1	25	110	21280	http://www.ebi.ac.uk/QuickGO/GTerm?id=GO:0005605
4	4	proteasome regulatory particle	GO:0005838	0.122	0.245	PSMD6|1.32702021	1	25	110	21280	http://www.ebi.ac.uk/QuickGO/GTerm?id=GO:0005838
5	4,5	intracellular membrane-bounded organelle	GO:0043231	0.129	0.258	A0A1D5PPT0|1.203939941;A0A3Q2U6J9|1.340342648;A0A3Q3ATJ1|1.201501275;A0A3Q3AZP2|1.434367428;UCH-L1|1.43716929;ACAT1|1.26178047;ENSGALG00000000295|1.49801844;PRDX6|1.247143535;MOSPD1|1.300070747;GPI|1.354148803;MYOM2|1.223302409;SDHA|1.217654696;ATP5F1|1.373436785;NPEPL1|1.259782993;EEF1B2|1.322594905;RTCB|1.284666414;CYB5R3|1.501083223;ARL8B|1.209421094;ARHGDIA|1.261342819;HSPB1|1.337774448;SMYD1…	56	9596	110	21280	http://www.ebi.ac.uk/QuickGO/GTerm?id=GO:0043231
4	3,4	endoplasmic reticulum membrane	GO:0005789	0.134	0.263	RTCB|1.284666414;ATP2A1|1.2337889;ERP44|0.745186445;FKBP12.6|0.773369444;ORMDL3|0.402916918	5	522	110	21280	http://www.ebi.ac.uk/QuickGO/GTerm?id=GO:0005789
4	4	proteasome accessory complex	GO:0022624	0.135	0.263	PSMD6|1.32702021	1	28	110	21280	http://www.ebi.ac.uk/QuickGO/GTerm?id=GO:0022624
9	6,7,8,9	transcription factor TFIID complex	GO:0005669	0.135	0.263	EDF1|1.274072423	1	28	110	21280	http://www.ebi.ac.uk/QuickGO/GTerm?id=GO:0005669
9	5,6,8,9	recycling endosome membrane	GO:0055038	0.135	0.263	LOC100859860|0.744437258	1	28	110	21280	http://www.ebi.ac.uk/QuickGO/GTerm?id=GO:0055038
4	4	COP9 signalosome	GO:0008180	0.14	0.27	COPS7B|0.663774909	1	29	110	21280	http://www.ebi.ac.uk/QuickGO/GTerm?id=GO:0008180
7	6,7	eukaryotic 48S preinitiation complex	GO:0033290	0.144	0.273	EIF3I|1.293629736	1	30	110	21280	http://www.ebi.ac.uk/QuickGO/GTerm?id=GO:0033290
7	6,7	eukaryotic 43S preinitiation complex	GO:0016282	0.144	0.273	EIF3I|1.293629736	1	30	110	21280	http://www.ebi.ac.uk/QuickGO/GTerm?id=GO:0016282
3	3	nuclear outer membrane-endoplasmic reticulum membrane network	GO:0042175	0.145	0.273	RTCB|1.284666414;ATP2A1|1.2337889;ERP44|0.745186445;FKBP12.6|0.773369444;ORMDL3|0.402916918	5	536	110	21280	http://www.ebi.ac.uk/QuickGO/GTerm?id=GO:0042175
4	4	ubiquitin ligase complex	GO:0000151	0.146	0.273	HSP70|1.283172572;CUL2|0.771088233;Rchy1|0.707606765	3	255	110	21280	http://www.ebi.ac.uk/QuickGO/GTerm?id=GO:0000151
6	5,6	translation preinitiation complex	GO:0070993	0.149	0.273	EIF3I|1.293629736	1	31	110	21280	http://www.ebi.ac.uk/QuickGO/GTerm?id=GO:0070993
5	4,5	ciliary membrane	GO:0060170	0.149	0.273	GPI|1.354148803	1	31	110	21280	http://www.ebi.ac.uk/QuickGO/GTerm?id=GO:0060170
5	5	main axon	GO:0044304	0.149	0.273	MBP|0.690656099	1	31	110	21280	http://www.ebi.ac.uk/QuickGO/GTerm?id=GO:0044304
5	3,4,5	retromer complex	GO:0030904	0.149	0.273	VPS29|0.751790268	1	31	110	21280	http://www.ebi.ac.uk/QuickGO/GTerm?id=GO:0030904
3	3	protein-DNA complex	GO:0032993	0.151	0.276	P08286|0.677683947;HP1BP3|0.72359077	2	133	110	21280	http://www.ebi.ac.uk/QuickGO/GTerm?id=GO:0032993
6	5,6	cell cortex part	GO:0044448	0.16	0.29	CAPZA2|1.308764545;GYPC|0.786106154	2	138	110	21280	http://www.ebi.ac.uk/QuickGO/GTerm?id=GO:0044448
4	4	perikaryon	GO:0043204	0.17	0.305	HSP70|1.283172572	1	36	110	21280	http://www.ebi.ac.uk/QuickGO/GTerm?id=GO:0043204
4	4	eukaryotic translation initiation factor 3 complex	GO:0005852	0.17	0.305	EIF3I|1.293629736	1	36	110	21280	http://www.ebi.ac.uk/QuickGO/GTerm?id=GO:0005852
5	5	cytoplasmic region	GO:0099568	0.171	0.305	HSPB1|1.337774448;GYPC|0.786106154	2	144	110	21280	http://www.ebi.ac.uk/QuickGO/GTerm?id=GO:0099568
4	4	proton-transporting ATP synthase complex	GO:0045259	0.175	0.308	ATP5F1|1.373436785	1	37	110	21280	http://www.ebi.ac.uk/QuickGO/GTerm?id=GO:0045259
5	4,5	proton-transporting two-sector ATPase complex, proton-transporting domain	GO:0033177	0.175	0.308	ATP5F1|1.373436785	1	37	110	21280	http://www.ebi.ac.uk/QuickGO/GTerm?id=GO:0033177
2	2	cell junction	GO:0030054	0.186	0.326	HSPB1|1.337774448;RPL27|1.485323169;SH3KBP1|1.234699811;HSP70|1.283172572;FLNB|0.613099367;GYPC|0.786106154;PPP1CB|0.799006051	7	902	110	21280	http://www.ebi.ac.uk/QuickGO/GTerm?id=GO:0030054
6	5,6	lipid particle	GO:0005811	0.192	0.331	CYB5R3|1.501083223	1	41	110	21280	http://www.ebi.ac.uk/QuickGO/GTerm?id=GO:0005811
5	4,5	intracellular organelle lumen	GO:0070013	0.192	0.331	A0A3Q3AZP2|1.434367428;UCH-L1|1.43716929;GPI|1.354148803;SDHA|1.217654696;ATP5F1|1.373436785;RTCB|1.284666414;BLMH|1.469427111;EDF1|1.274072423;HSP70|1.283172572;TIMM13|1.33072494;ERP44|0.745186445;TAF15|0.685582591;SRSF5|0.613528475;COPS7B|0.663774909;CUL2|0.771088233;KPNA3|0.806756534;SRSF2|0.465409726;PPP1CB|0.799006051;Rchy1|0.707606765;GLRX5|0.502973712	20	3152	110	21280	http://www.ebi.ac.uk/QuickGO/GTerm?id=GO:0070013
5	4,5	endoplasmic reticulum part	GO:0044432	0.192	0.331	RTCB|1.284666414;ATP2A1|1.2337889;ERP44|0.745186445;FKBP12.6|0.773369444;ORMDL3|0.402916918	5	592	110	21280	http://www.ebi.ac.uk/QuickGO/GTerm?id=GO:0044432
3	3	organelle lumen	GO:0043233	0.194	0.332	A0A3Q3AZP2|1.434367428;UCH-L1|1.43716929;GPI|1.354148803;SDHA|1.217654696;ATP5F1|1.373436785;RTCB|1.284666414;BLMH|1.469427111;EDF1|1.274072423;HSP70|1.283172572;TIMM13|1.33072494;ERP44|0.745186445;TAF15|0.685582591;SRSF5|0.613528475;COPS7B|0.663774909;CUL2|0.771088233;KPNA3|0.806756534;SRSF2|0.465409726;PPP1CB|0.799006051;Rchy1|0.707606765;GLRX5|0.502973712	20	3158	110	21280	http://www.ebi.ac.uk/QuickGO/GTerm?id=GO:0043233
2	2	membrane-enclosed lumen	GO:0031974	0.199	0.339	A0A3Q3AZP2|1.434367428;UCH-L1|1.43716929;GPI|1.354148803;SDHA|1.217654696;ATP5F1|1.373436785;RTCB|1.284666414;BLMH|1.469427111;EDF1|1.274072423;HSP70|1.283172572;TIMM13|1.33072494;ERP44|0.745186445;TAF15|0.685582591;SRSF5|0.613528475;COPS7B|0.663774909;CUL2|0.771088233;KPNA3|0.806756534;SRSF2|0.465409726;PPP1CB|0.799006051;Rchy1|0.707606765;GLRX5|0.502973712	20	3171	110	21280	http://www.ebi.ac.uk/QuickGO/GTerm?id=GO:0031974
9	5,6,8,9	early endosome membrane	GO:0031901	0.204	0.341	RAB5C|2.549741805	1	44	110	21280	http://www.ebi.ac.uk/QuickGO/GTerm?id=GO:0031901
7	5,6,7	mitochondrial intermembrane space	GO:0005758	0.204	0.341	TIMM13|1.33072494	1	44	110	21280	http://www.ebi.ac.uk/QuickGO/GTerm?id=GO:0005758
4	4	dendritic spine	GO:0043197	0.204	0.341	ENSGALG00000027330|1.235499055	1	44	110	21280	http://www.ebi.ac.uk/QuickGO/GTerm?id=GO:0043197
5	4,5	organelle subcompartment	GO:0031984	0.214	0.356	RTCB|1.284666414;ATP2A1|1.2337889;ERP44|0.745186445;FKBP12.6|0.773369444;GLIPR2|0.785712158;ORMDL3|0.402916918	6	777	110	21280	http://www.ebi.ac.uk/QuickGO/GTerm?id=GO:0031984
5	5	neuron spine	GO:0044309	0.216	0.358	ENSGALG00000027330|1.235499055	1	47	110	21280	http://www.ebi.ac.uk/QuickGO/GTerm?id=GO:0044309
6	5,6	endoplasmic reticulum lumen	GO:0005788	0.224	0.369	ERP44|0.745186445	1	49	110	21280	http://www.ebi.ac.uk/QuickGO/GTerm?id=GO:0005788
5	4,5	plasma membrane protein complex	GO:0098797	0.232	0.377	A0A3Q2TTX7|1.32240644;CATSPER2|1.202421769;A0A3Q3ATJ1|1.201501275;HSP70|1.283172572	4	476	110	21280	http://www.ebi.ac.uk/QuickGO/GTerm?id=GO:0098797
5	4,5	endosome membrane	GO:0010008	0.233	0.377	RAB5C|2.549741805;LOC100859860|0.744437258	2	177	110	21280	http://www.ebi.ac.uk/QuickGO/GTerm?id=GO:0010008
6	5,6	nuclear lumen	GO:0031981	0.233	0.377	A0A3Q3AZP2|1.434367428;UCH-L1|1.43716929;GPI|1.354148803;SDHA|1.217654696;ATP5F1|1.373436785;RTCB|1.284666414;BLMH|1.469427111;EDF1|1.274072423;HSP70|1.283172572;TIMM13|1.33072494;TAF15|0.685582591;SRSF5|0.613528475;COPS7B|0.663774909;CUL2|0.771088233;KPNA3|0.806756534;SRSF2|0.465409726;PPP1CB|0.799006051;Rchy1|0.707606765	18	2892	110	21280	http://www.ebi.ac.uk/QuickGO/GTerm?id=GO:0031981
8	5,6,7,8	histone methyltransferase complex	GO:0035097	0.24	0.387	PPP1CB|0.799006051	1	53	110	21280	http://www.ebi.ac.uk/QuickGO/GTerm?id=GO:0035097
5	4,5	organelle envelope lumen	GO:0031970	0.244	0.391	TIMM13|1.33072494	1	54	110	21280	http://www.ebi.ac.uk/QuickGO/GTerm?id=GO:0031970
7	6,7	fibrillar center	GO:0001650	0.248	0.395	TIMM13|1.33072494	1	55	110	21280	http://www.ebi.ac.uk/QuickGO/GTerm?id=GO:0001650
9	7,8,9	nuclear speck	GO:0016607	0.25	0.396	SRSF5|0.613528475;SRSF2|0.465409726	2	186	110	21280	http://www.ebi.ac.uk/QuickGO/GTerm?id=GO:0016607
3	3	endomembrane system	GO:0012505	0.252	0.398	A0A3Q2U6J9|1.340342648;A0A3Q3ATJ1|1.201501275;EEF1B2|1.322594905;RTCB|1.284666414;CYB5R3|1.501083223;ATP2A1|1.2337889;RAB5C|2.549741805;ENSGALG00000027330|1.235499055;BCAP31|0.807755804;VPS29|0.751790268;A0A3Q2U769|0.584188784;ERP44|0.745186445;LOC100859860|0.744437258;KPNA3|0.806756534;FKBP12.6|0.773369444;GLIPR2|0.785712158;ORMDL3|0.402916918	17	2753	110	21280	http://www.ebi.ac.uk/QuickGO/GTerm?id=GO:0012505
6	5,6	endosomal part	GO:0044440	0.26	0.406	RAB5C|2.549741805;LOC100859860|0.744437258	2	191	110	21280	http://www.ebi.ac.uk/QuickGO/GTerm?id=GO:0044440
4	3,4	blood microparticle	GO:0072562	0.264	0.407	HSP70|1.283172572	1	59	110	21280	http://www.ebi.ac.uk/QuickGO/GTerm?id=GO:0072562
6	3,6	protein serine/threonine phosphatase complex	GO:0008287	0.264	0.407	PPP1CB|0.799006051	1	59	110	21280	http://www.ebi.ac.uk/QuickGO/GTerm?id=GO:0008287
5	5	phosphatase complex	GO:1903293	0.264	0.407	PPP1CB|0.799006051	1	59	110	21280	http://www.ebi.ac.uk/QuickGO/GTerm?id=GO:1903293
4	4	nuclear pore	GO:0005643	0.268	0.41	KPNA3|0.806756534	1	60	110	21280	http://www.ebi.ac.uk/QuickGO/GTerm?id=GO:0005643
6	5,6	nucleoplasm	GO:0005654	0.271	0.411	A0A3Q3AZP2|1.434367428;UCH-L1|1.43716929;GPI|1.354148803;ATP5F1|1.373436785;RTCB|1.284666414;BLMH|1.469427111;EDF1|1.274072423;TAF15|0.685582591;SRSF5|0.613528475;COPS7B|0.663774909;KPNA3|0.806756534;SRSF2|0.465409726;PPP1CB|0.799006051;Rchy1|0.707606765	14	2249	110	21280	http://www.ebi.ac.uk/QuickGO/GTerm?id=GO:0005654
8	6,7,8	condensed nuclear chromosome	GO:0000794	0.271	0.411	HSP70|1.283172572	1	61	110	21280	http://www.ebi.ac.uk/QuickGO/GTerm?id=GO:0000794
2	2	other organism part	GO:0044217	0.279	0.411	RANBP1|1.340088175	1	63	110	21280	http://www.ebi.ac.uk/QuickGO/GTerm?id=GO:0044217
7	6,7	cytosolic large ribosomal subunit	GO:0022625	0.279	0.411	RPL27|1.485323169	1	63	110	21280	http://www.ebi.ac.uk/QuickGO/GTerm?id=GO:0022625
3	3	other organism cell	GO:0044216	0.279	0.411	RANBP1|1.340088175	1	63	110	21280	http://www.ebi.ac.uk/QuickGO/GTerm?id=GO:0044216
2	2	other organism	GO:0044215	0.279	0.411	RANBP1|1.340088175	1	63	110	21280	http://www.ebi.ac.uk/QuickGO/GTerm?id=GO:0044215
3	3	host	GO:0018995	0.279	0.411	RANBP1|1.340088175	1	63	110	21280	http://www.ebi.ac.uk/QuickGO/GTerm?id=GO:0018995
4	4	host cell	GO:0043657	0.279	0.411	RANBP1|1.340088175	1	63	110	21280	http://www.ebi.ac.uk/QuickGO/GTerm?id=GO:0043657
4	4	cell cortex	GO:0005938	0.281	0.411	CAPZA2|1.308764545;GYPC|0.786106154	2	202	110	21280	http://www.ebi.ac.uk/QuickGO/GTerm?id=GO:0005938
5	4,5	cell-cell adherens junction	GO:0005913	0.286	0.418	GYPC|0.786106154	1	65	110	21280	http://www.ebi.ac.uk/QuickGO/GTerm?id=GO:0005913
4	4	proteinaceous extracellular matrix	GO:0005578	0.291	0.422	NID2|0.740439165;LAMA4|0.797937472;COL1A2|0.584695563	3	364	110	21280	http://www.ebi.ac.uk/QuickGO/GTerm?id=GO:0005578
6	6	cell projection cytoplasm	GO:0032838	0.294	0.424	HSPB1|1.337774448	1	67	110	21280	http://www.ebi.ac.uk/QuickGO/GTerm?id=GO:0032838
4	4	methyltransferase complex	GO:0034708	0.297	0.427	PPP1CB|0.799006051	1	68	110	21280	http://www.ebi.ac.uk/QuickGO/GTerm?id=GO:0034708
4	4	collagen trimer	GO:0005581	0.305	0.436	COL1A2|0.584695563	1	70	110	21280	http://www.ebi.ac.uk/QuickGO/GTerm?id=GO:0005581
4	4	sarcolemma	GO:0042383	0.308	0.439	A0A3Q3ATJ1|1.201501275	1	71	110	21280	http://www.ebi.ac.uk/QuickGO/GTerm?id=GO:0042383
6	5,6	nucleolus	GO:0005730	0.317	0.449	SDHA|1.217654696;EDF1|1.274072423;TIMM13|1.33072494;SRSF5|0.613528475;CUL2|0.771088233	5	721	110	21280	http://www.ebi.ac.uk/QuickGO/GTerm?id=GO:0005730
6	5,6	nucleus	GO:0005634	0.329	0.463	A0A1D5PPT0|1.203939941;A0A3Q3AZP2|1.434367428;UCH-L1|1.43716929;ENSGALG00000000295|1.49801844;PRDX6|1.247143535;MOSPD1|1.300070747;GPI|1.354148803;SDHA|1.217654696;ATP5F1|1.373436785;NPEPL1|1.259782993;RTCB|1.284666414;ARHGDIA|1.261342819;HSPB1|1.337774448;SMYD1|1.332742776;RPL27|1.485323169;BLMH|1.469427111;UBE2V2|1.250642582;RANBP1|1.340088175;KPNA4|1.24977891;EDF1|1.274072423;HSP70|1.283172572…	35	6275	110	21280	http://www.ebi.ac.uk/QuickGO/GTerm?id=GO:0005634
8	4,6,7,8	actin filament	GO:0005884	0.347	0.486	TPM1|1.390357267	1	82	110	21280	http://www.ebi.ac.uk/QuickGO/GTerm?id=GO:0005884
4	4	neuron projection	GO:0043005	0.362	0.503	UCH-L1|1.43716929;HSPB1|1.337774448;ENSGALG00000027330|1.235499055;MBP|0.690656099	4	588	110	21280	http://www.ebi.ac.uk/QuickGO/GTerm?id=GO:0043005
5	4,5	proton-transporting two-sector ATPase complex	GO:0016469	0.364	0.503	ATP5F1|1.373436785	1	87	110	21280	http://www.ebi.ac.uk/QuickGO/GTerm?id=GO:0016469
6	6	transferase complex, transferring phosphorus-containing groups	GO:0061695	0.364	0.503	EDF1|1.274072423;PRKAB2|0.71569607	2	246	110	21280	http://www.ebi.ac.uk/QuickGO/GTerm?id=GO:0061695
7	7	protein kinase complex	GO:1902911	0.367	0.505	PRKAB2|0.71569607	1	88	110	21280	http://www.ebi.ac.uk/QuickGO/GTerm?id=GO:1902911
8	5,7,8	recycling endosome	GO:0055037	0.37	0.507	LOC100859860|0.744437258	1	89	110	21280	http://www.ebi.ac.uk/QuickGO/GTerm?id=GO:0055037
4	4	proteasome complex	GO:0000502	0.389	0.531	PSMD6|1.32702021	1	95	110	21280	http://www.ebi.ac.uk/QuickGO/GTerm?id=GO:0000502
8	6,7,8	DNA-directed RNA polymerase II, holoenzyme	GO:0016591	0.408	0.554	EDF1|1.274072423	1	101	110	21280	http://www.ebi.ac.uk/QuickGO/GTerm?id=GO:0016591
6	5,6	nucleolar part	GO:0044452	0.411	0.556	TIMM13|1.33072494	1	102	110	21280	http://www.ebi.ac.uk/QuickGO/GTerm?id=GO:0044452
8	6,7,8	cytosolic ribosome	GO:0022626	0.423	0.57	RPL27|1.485323169	1	106	110	21280	http://www.ebi.ac.uk/QuickGO/GTerm?id=GO:0022626
7	6,7	RNA polymerase II transcription factor complex	GO:0090575	0.426	0.571	EDF1|1.274072423	1	107	110	21280	http://www.ebi.ac.uk/QuickGO/GTerm?id=GO:0090575
3	3	midbody	GO:0030496	0.429	0.573	ARL8B|1.209421094	1	108	110	21280	http://www.ebi.ac.uk/QuickGO/GTerm?id=GO:0030496
6	5,6	lytic vacuole membrane	GO:0098852	0.441	0.586	ARL8B|1.209421094	1	112	110	21280	http://www.ebi.ac.uk/QuickGO/GTerm?id=GO:0098852
5	5	mitochondrial outer membrane	GO:0005741	0.453	0.598	SAMM50|0.563408826	1	116	110	21280	http://www.ebi.ac.uk/QuickGO/GTerm?id=GO:0005741
6	5,6	large ribosomal subunit	GO:0015934	0.461	0.607	RPL27|1.485323169	1	119	110	21280	http://www.ebi.ac.uk/QuickGO/GTerm?id=GO:0015934
5	4,5	nuclear part	GO:0044428	0.466	0.609	A0A3Q3AZP2|1.434367428;UCH-L1|1.43716929;GPI|1.354148803;SDHA|1.217654696;ATP5F1|1.373436785;RTCB|1.284666414;BLMH|1.469427111;EDF1|1.274072423;HSP70|1.283172572;TIMM13|1.33072494;TAF15|0.685582591;SRSF5|0.613528475;COPS7B|0.663774909;CUL2|0.771088233;KPNA3|0.806756534;SRSF2|0.465409726;PPP1CB|0.799006051;Rchy1|0.707606765	18	3345	110	21280	http://www.ebi.ac.uk/QuickGO/GTerm?id=GO:0044428
6	5,6	nuclear DNA-directed RNA polymerase complex	GO:0055029	0.467	0.609	EDF1|1.274072423	1	121	110	21280	http://www.ebi.ac.uk/QuickGO/GTerm?id=GO:0055029
5	5	DNA-directed RNA polymerase complex	GO:0000428	0.47	0.61	EDF1|1.274072423	1	122	110	21280	http://www.ebi.ac.uk/QuickGO/GTerm?id=GO:0000428
4	4	RNA polymerase complex	GO:0030880	0.472	0.611	EDF1|1.274072423	1	123	110	21280	http://www.ebi.ac.uk/QuickGO/GTerm?id=GO:0030880
4	4	organelle outer membrane	GO:0031968	0.481	0.618	SAMM50|0.563408826	1	126	110	21280	http://www.ebi.ac.uk/QuickGO/GTerm?id=GO:0031968
3	3	neuron part	GO:0097458	0.488	0.624	UCH-L1|1.43716929;HSPB1|1.337774448;HSP70|1.283172572;ENSGALG00000027330|1.235499055;MBP|0.690656099	5	888	110	21280	http://www.ebi.ac.uk/QuickGO/GTerm?id=GO:0097458
3	3	outer membrane	GO:0019867	0.491	0.624	SAMM50|0.563408826	1	130	110	21280	http://www.ebi.ac.uk/QuickGO/GTerm?id=GO:0019867
5	5	cell projection membrane	GO:0031253	0.491	0.624	GPI|1.354148803	1	130	110	21280	http://www.ebi.ac.uk/QuickGO/GTerm?id=GO:0031253
6	4,5,6	nuclear envelope	GO:0005635	0.501	0.634	RTCB|1.284666414;KPNA3|0.806756534	2	324	110	21280	http://www.ebi.ac.uk/QuickGO/GTerm?id=GO:0005635
6	5,6	nuclear transcription factor complex	GO:0044798	0.507	0.639	EDF1|1.274072423	1	136	110	21280	http://www.ebi.ac.uk/QuickGO/GTerm?id=GO:0044798
5	4,5	cytoplasmic vesicle part	GO:0044433	0.511	0.641	RAB5C|2.549741805;LOC100859860|0.744437258	2	330	110	21280	http://www.ebi.ac.uk/QuickGO/GTerm?id=GO:0044433
7	6,7	condensed chromosome	GO:0000793	0.515	0.643	HSP70|1.283172572	1	139	110	21280	http://www.ebi.ac.uk/QuickGO/GTerm?id=GO:0000793
3	3	cell periphery	GO:0071944	0.528	0.656	A0A3Q2TTX7|1.32240644;CATSPER2|1.202421769;A0A3Q3ATJ1|1.201501275;A0A3Q3AZP2|1.434367428;UCH-L1|1.43716929;GPI|1.354148803;ARHGDIA|1.261342819;HSPB1|1.337774448;TPM1|1.390357267;CAPZA2|1.308764545;HSP70|1.283172572;RAB5C|2.549741805;FLNB|0.613099367;GYPC|0.786106154;NID2|0.740439165;MBP|0.690656099;MPZ|0.531735444;PRKCA|0.487532754;FXYD6|0.766199089	19	3653	110	21280	http://www.ebi.ac.uk/QuickGO/GTerm?id=GO:0071944
6	5,6	spliceosomal complex	GO:0005681	0.534	0.662	SRSF2|0.465409726	1	147	110	21280	http://www.ebi.ac.uk/QuickGO/GTerm?id=GO:0005681
4	4	transcription factor complex	GO:0005667	0.541	0.667	EDF1|1.274072423;SUB1|0.814720615	2	349	110	21280	http://www.ebi.ac.uk/QuickGO/GTerm?id=GO:0005667
3	3	cell-cell junction	GO:0005911	0.564	0.692	SH3KBP1|1.234699811;GYPC|0.786106154	2	364	110	21280	http://www.ebi.ac.uk/QuickGO/GTerm?id=GO:0005911
3	3	plasma membrane	GO:0005886	0.566	0.692	A0A3Q2TTX7|1.32240644;CATSPER2|1.202421769;A0A3Q3ATJ1|1.201501275;A0A3Q3AZP2|1.434367428;UCH-L1|1.43716929;GPI|1.354148803;ARHGDIA|1.261342819;HSPB1|1.337774448;TPM1|1.390357267;HSP70|1.283172572;RAB5C|2.549741805;FLNB|0.613099367;GYPC|0.786106154;NID2|0.740439165;MBP|0.690656099;MPZ|0.531735444;PRKCA|0.487532754;FXYD6|0.766199089	18	3531	110	21280	http://www.ebi.ac.uk/QuickGO/GTerm?id=GO:0005886
5	5	cullin-RING ubiquitin ligase complex	GO:0031461	0.576	0.7	CUL2|0.771088233	1	165	110	21280	http://www.ebi.ac.uk/QuickGO/GTerm?id=GO:0031461
8	6,7,8	nuclear body	GO:0016604	0.577	0.7	SRSF5|0.613528475;SRSF2|0.465409726	2	373	110	21280	http://www.ebi.ac.uk/QuickGO/GTerm?id=GO:0016604
7	5,6,7	nucleoplasm part	GO:0044451	0.59	0.713	EDF1|1.274072423;SRSF5|0.613528475;SRSF2|0.465409726;PPP1CB|0.799006051	4	793	110	21280	http://www.ebi.ac.uk/QuickGO/GTerm?id=GO:0044451
8	5,7,8	early endosome	GO:0005769	0.596	0.717	RAB5C|2.549741805	1	174	110	21280	http://www.ebi.ac.uk/QuickGO/GTerm?id=GO:0005769
9	6,7,8,9	lysosomal membrane	GO:0005765	0.6	0.719	ARL8B|1.209421094	1	176	110	21280	http://www.ebi.ac.uk/QuickGO/GTerm?id=GO:0005765
6	5,6	chromatin	GO:0000785	0.603	0.72	P08286|0.677683947;HP1BP3|0.72359077	2	391	110	21280	http://www.ebi.ac.uk/QuickGO/GTerm?id=GO:0000785
3	3	cell projection	GO:0042995	0.61	0.725	UCH-L1|1.43716929;CAPZA2|1.308764545;ENSGALG00000027330|1.235499055;FLNB|0.613099367;MBP|0.690656099	5	1018	110	21280	http://www.ebi.ac.uk/QuickGO/GTerm?id=GO:0042995
5	4,5	ribosomal subunit	GO:0044391	0.64	0.756	RPL27|1.485323169	1	196	110	21280	http://www.ebi.ac.uk/QuickGO/GTerm?id=GO:0044391
6	5,6	mitochondrial matrix	GO:0005759	0.641	0.756	GLRX5|0.502973712	1	197	110	21280	http://www.ebi.ac.uk/QuickGO/GTerm?id=GO:0005759
4	3,4	cell projection part	GO:0044463	0.645	0.757	ENSGALG00000027330|1.235499055;MBP|0.690656099	2	422	110	21280	http://www.ebi.ac.uk/QuickGO/GTerm?id=GO:0044463
5	5	dendrite	GO:0030425	0.667	0.78	ENSGALG00000027330|1.235499055	1	211	110	21280	http://www.ebi.ac.uk/QuickGO/GTerm?id=GO:0030425
3	3	plasma membrane part	GO:0044459	0.677	0.786	A0A3Q2TTX7|1.32240644;CATSPER2|1.202421769;A0A3Q3ATJ1|1.201501275;GPI|1.354148803;ARHGDIA|1.261342819;HSP70|1.283172572;GYPC|0.786106154;MPZ|0.531735444;FXYD6|0.766199089	9	1932	110	21280	http://www.ebi.ac.uk/QuickGO/GTerm?id=GO:0044459
5	4,5	vacuolar membrane	GO:0005774	0.679	0.786	ARL8B|1.209421094	1	218	110	21280	http://www.ebi.ac.uk/QuickGO/GTerm?id=GO:0005774
8	5,6,7,8	spindle	GO:0005819	0.68	0.786	ARL8B|1.209421094	1	219	110	21280	http://www.ebi.ac.uk/QuickGO/GTerm?id=GO:0005819
7	4,5,6,7	vacuolar part	GO:0044437	0.682	0.786	ARL8B|1.209421094	1	220	110	21280	http://www.ebi.ac.uk/QuickGO/GTerm?id=GO:0044437
3	3	cell surface	GO:0009986	0.702	0.806	HSP70|1.283172572;ERP44|0.745186445	2	470	110	21280	http://www.ebi.ac.uk/QuickGO/GTerm?id=GO:0009986
5	4,5	chromosomal part	GO:0044427	0.72	0.821	HSP70|1.283172572;P08286|0.677683947;HP1BP3|0.72359077	3	716	110	21280	http://www.ebi.ac.uk/QuickGO/GTerm?id=GO:0044427
4	4	intracellular vesicle	GO:0097708	0.721	0.821	SH3KBP1|1.234699811;RAB5C|2.549741805;LOC100859860|0.744437258	3	717	110	21280	http://www.ebi.ac.uk/QuickGO/GTerm?id=GO:0097708
4	4	intracellular ribonucleoprotein complex	GO:0030529	0.724	0.821	EIF3I|1.293629736;RPL27|1.485323169;HSP70|1.283172572;SRSF2|0.465409726	4	943	110	21280	http://www.ebi.ac.uk/QuickGO/GTerm?id=GO:0030529
3	3	postsynapse	GO:0098794	0.73	0.824	ENSGALG00000027330|1.235499055	1	251	110	21280	http://www.ebi.ac.uk/QuickGO/GTerm?id=GO:0098794
7	4,6,7	endosome	GO:0005768	0.732	0.824	RAB5C|2.549741805;LOC100859860|0.744437258	2	498	110	21280	http://www.ebi.ac.uk/QuickGO/GTerm?id=GO:0005768
3	3	ciliary part	GO:0044441	0.744	0.834	GPI|1.354148803	1	261	110	21280	http://www.ebi.ac.uk/QuickGO/GTerm?id=GO:0044441
3	3	whole membrane	GO:0098805	0.764	0.853	GPI|1.354148803;ARL8B|1.209421094;RAB5C|2.549741805;SAMM50|0.563408826;LOC100859860|0.744437258	5	1222	110	21280	http://www.ebi.ac.uk/QuickGO/GTerm?id=GO:0098805
3	3	ribonucleoprotein complex	GO:1990904	0.776	0.864	EIF3I|1.293629736;RPL27|1.485323169;HSP70|1.283172572	3	785	110	21280	http://www.ebi.ac.uk/QuickGO/GTerm?id=GO:1990904
6	5,6	chromosome	GO:0005694	0.787	0.87	HSP70|1.283172572;P08286|0.677683947;HP1BP3|0.72359077	3	800	110	21280	http://www.ebi.ac.uk/QuickGO/GTerm?id=GO:0005694
3	3	receptor complex	GO:0043235	0.788	0.87	HSP70|1.283172572	1	297	110	21280	http://www.ebi.ac.uk/QuickGO/GTerm?id=GO:0043235
8	7,8	lysosome	GO:0005764	0.818	0.899	ARL8B|1.209421094	1	326	110	21280	http://www.ebi.ac.uk/QuickGO/GTerm?id=GO:0005764
7	6,7	lytic vacuole	GO:0000323	0.822	0.899	ARL8B|1.209421094	1	330	110	21280	http://www.ebi.ac.uk/QuickGO/GTerm?id=GO:0000323
6	5,6	Golgi membrane	GO:0000139	0.823	0.899	GLIPR2|0.785712158	1	332	110	21280	http://www.ebi.ac.uk/QuickGO/GTerm?id=GO:0000139
3	3	cilium	GO:0005929	0.85	0.924	GPI|1.354148803	1	363	110	21280	http://www.ebi.ac.uk/QuickGO/GTerm?id=GO:0005929
7	5,6,7	nuclear chromosome part	GO:0044454	0.852	0.924	HSP70|1.283172572	1	366	110	21280	http://www.ebi.ac.uk/QuickGO/GTerm?id=GO:0044454
6	5,6	cytoplasmic vesicle	GO:0031410	0.856	0.925	SH3KBP1|1.234699811;RAB5C|2.549741805;LOC100859860|0.744437258	3	913	110	21280	http://www.ebi.ac.uk/QuickGO/GTerm?id=GO:0031410
6	5,6	nuclear chromosome	GO:0000228	0.871	0.937	HSP70|1.283172572	1	391	110	21280	http://www.ebi.ac.uk/QuickGO/GTerm?id=GO:0000228
7	5,6,7	Golgi subcompartment	GO:0098791	0.875	0.937	GLIPR2|0.785712158	1	398	110	21280	http://www.ebi.ac.uk/QuickGO/GTerm?id=GO:0098791
6	5,6	vacuole	GO:0005773	0.877	0.937	ARL8B|1.209421094	1	401	110	21280	http://www.ebi.ac.uk/QuickGO/GTerm?id=GO:0005773
2	2	synapse part	GO:0044456	0.897	0.95	ENSGALG00000027330|1.235499055	1	435	110	21280	http://www.ebi.ac.uk/QuickGO/GTerm?id=GO:0044456
9	6,7,8,9	centrosome	GO:0005813	0.898	0.95	RANBP1|1.340088175	1	436	110	21280	http://www.ebi.ac.uk/QuickGO/GTerm?id=GO:0005813
6	5,6	ribosome	GO:0005840	0.899	0.95	RPL27|1.485323169	1	438	110	21280	http://www.ebi.ac.uk/QuickGO/GTerm?id=GO:0005840
5	4,5	Golgi apparatus part	GO:0044431	0.929	0.967	GLIPR2|0.785712158	1	503	110	21280	http://www.ebi.ac.uk/QuickGO/GTerm?id=GO:0044431
5	5	integral component of plasma membrane	GO:0005887	0.93	0.967	GYPC|0.786106154;MPZ|0.531735444;FXYD6|0.766199089	3	1105	110	21280	http://www.ebi.ac.uk/QuickGO/GTerm?id=GO:0005887
5	5	cytoplasmic, membrane-bounded vesicle	GO:0016023	0.93	0.967	RAB5C|2.549741805	1	508	110	21280	http://www.ebi.ac.uk/QuickGO/GTerm?id=GO:0016023
4	4	plasma membrane region	GO:0098590	0.934	0.967	GPI|1.354148803	1	519	110	21280	http://www.ebi.ac.uk/QuickGO/GTerm?id=GO:0098590
2	2	membrane	GO:0016020	0.935	0.967	PBXIP1|1.284159514;RYR3|1.208753681;ATP2B4|1.454010951;ATP2B2|1.385296881;A0A3Q2TTX7|1.32240644;A0A3Q2U6J9|1.340342648;CATSPER2|1.202421769;A0A3Q3ATJ1|1.201501275;A0A3Q3AZP2|1.434367428;UCH-L1|1.43716929;ACAT1|1.26178047;PRDX6|1.247143535;MOSPD1|1.300070747;GPI|1.354148803;SDHA|1.217654696;ATP5F1|1.373436785;RTCB|1.284666414;CYB5R3|1.501083223;ARL8B|1.209421094;ARHGDIA|1.261342819;HSPB1|1.3377744…	46	10329	110	21280	http://www.ebi.ac.uk/QuickGO/GTerm?id=GO:0016020
8	5,6,7,8	microtubule organizing center	GO:0005815	0.938	0.967	RANBP1|1.340088175	1	531	110	21280	http://www.ebi.ac.uk/QuickGO/GTerm?id=GO:0005815
4	4	intrinsic component of plasma membrane	GO:0031226	0.94	0.967	GYPC|0.786106154;MPZ|0.531735444;FXYD6|0.766199089	3	1147	110	21280	http://www.ebi.ac.uk/QuickGO/GTerm?id=GO:0031226
7	3,5,6,7	polymeric cytoskeletal fiber	GO:0099513	0.941	0.967	TPM1|1.390357267	1	539	110	21280	http://www.ebi.ac.uk/QuickGO/GTerm?id=GO:0099513
2	2	synapse	GO:0045202	0.955	0.978	ENSGALG00000027330|1.235499055	1	590	110	21280	http://www.ebi.ac.uk/QuickGO/GTerm?id=GO:0045202
3	3	membrane region	GO:0098589	0.966	0.986	GPI|1.354148803	1	641	110	21280	http://www.ebi.ac.uk/QuickGO/GTerm?id=GO:0098589
7	6,7	microtubule cytoskeleton	GO:0015630	0.97	0.986	ARL8B|1.209421094;RANBP1|1.340088175	2	1011	110	21280	http://www.ebi.ac.uk/QuickGO/GTerm?id=GO:0015630
6	4,5,6	Golgi apparatus	GO:0005794	0.973	0.987	A0A3Q2U769|0.584188784;GLIPR2|0.785712158	2	1040	110	21280	http://www.ebi.ac.uk/QuickGO/GTerm?id=GO:0005794
2	2	membrane part	GO:0044425	1.00e+00	1.00e+00	PBXIP1|1.284159514;RYR3|1.208753681;ATP2B4|1.454010951;ATP2B2|1.385296881;A0A3Q2TTX7|1.32240644;CATSPER2|1.202421769;A0A3Q3ATJ1|1.201501275;MOSPD1|1.300070747;GPI|1.354148803;ATP5F1|1.373436785;RTCB|1.284666414;ARHGDIA|1.261342819;ATP2A1|1.2337889;HSP70|1.283172572;COX7C|1.254685321;BCAP31|0.807755804;VPS29|0.751790268;A0A3Q2U769|0.584188784;A0A3Q3AUQ1|0.818305002;ERP44|0.745186445;SAMM50|0.56340…	26	8210	110	21280	http://www.ebi.ac.uk/QuickGO/GTerm?id=GO:0044425
4	4	integral component of membrane	GO:0016021	1.00e+00	1.00e+00	PBXIP1|1.284159514;RYR3|1.208753681;ATP2B4|1.454010951;ATP2B2|1.385296881;A0A3Q2TTX7|1.32240644;CATSPER2|1.202421769;A0A3Q3ATJ1|1.201501275;MOSPD1|1.300070747;ATP2A1|1.2337889;HSP70|1.283172572;COX7C|1.254685321;BCAP31|0.807755804;A0A3Q2U769|0.584188784;A0A3Q3AUQ1|0.818305002;SAMM50|0.563408826;GYPC|0.786106154;MPZ|0.531735444;FXYD6|0.766199089;FKBP12.6|0.773369444;ORMDL3|0.402916918	20	7149	110	21280	http://www.ebi.ac.uk/QuickGO/GTerm?id=GO:0016021
3	3	intrinsic component of membrane	GO:0031224	1.00e+00	1.00e+00	PBXIP1|1.284159514;RYR3|1.208753681;ATP2B4|1.454010951;ATP2B2|1.385296881;A0A3Q2TTX7|1.32240644;CATSPER2|1.202421769;A0A3Q3ATJ1|1.201501275;MOSPD1|1.300070747;ATP2A1|1.2337889;HSP70|1.283172572;COX7C|1.254685321;BCAP31|0.807755804;A0A3Q2U769|0.584188784;A0A3Q3AUQ1|0.818305002;SAMM50|0.563408826;GYPC|0.786106154;MPZ|0.531735444;FXYD6|0.766199089;FKBP12.6|0.773369444;ORMDL3|0.402916918	20	7224	110	21280	http://www.ebi.ac.uk/QuickGO/GTerm?id=GO:0031224
5	4,5	HSP90-CDC37 chaperone complex	GO:1990565	1.00e+00	1.00e+00	A0A3Q2UCH4|1.308620615	1	0	110	21280	http://www.ebi.ac.uk/QuickGO/GTerm?id=GO:1990565

## Sheet: MF-P120 vs P90
maxLevel	levels	GO_Name	GO_ID	Pvalue	Pvalue_adjusted	Genes	Count	Pop_Hit	List_Total	Background_Genes	URL
3	3	drug binding	GO:0008144	8.98e-06	0.00169	PTGES3|1.249959146;CAMK2D|1.395725167;ALB|1.487005807;SPEG|0.804476254;FKBP12.6|0.773369444	5	51	120	21769	http://www.ebi.ac.uk/QuickGO/GTerm?id=GO:0008144
3	3	structural constituent of muscle	GO:0008307	1.2e-05	0.00169	PDLIM3|1.286425032;MYOM2|1.223302409;TPM1|1.390357267;MYBPC2|1.243510197	4	26	120	21769	http://www.ebi.ac.uk/QuickGO/GTerm?id=GO:0008307
5	5	actin binding	GO:0003779	1.33e-05	0.00169	A0A3Q2UHZ2|1.275488117;A0A3Q3A4C6|1.222983947;LMOD3|1.522555731;MYOM2|1.223302409;MYPN|1.223593919;TPM1|1.390357267;P13538|1.306581388;MYBPC2|1.243510197;TAGLN|1.249989286;CAPZA2|1.308764545;ENSGALG00000027330|1.235499055;GMFB|0.703153051;FLNB|0.613099367	13	560	120	21769	http://www.ebi.ac.uk/QuickGO/GTerm?id=GO:0003779
4	4	cytoskeletal protein binding	GO:0008092	1.85e-05	0.00175	A0A3Q2UHZ2|1.275488117;A0A3Q3A4C6|1.222983947;LMOD3|1.522555731;PDLIM3|1.286425032;MYOM2|1.223302409;RTCB|1.284666414;ARL8B|1.209421094;MYPN|1.223593919;TPM1|1.390357267;P13538|1.306581388;MYBPC2|1.243510197;TAGLN|1.249989286;CAPZA2|1.308764545;ENSGALG00000027330|1.235499055;ALDOC|1.365001997;GMFB|0.703153051;FLNB|0.613099367;DPYSL2|0.795640031	18	1053	120	21769	http://www.ebi.ac.uk/QuickGO/GTerm?id=GO:0008092
7	7	muscle alpha-actinin binding	GO:0051371	5.69e-05	0.00431	MYOM2|1.223302409;MYPN|1.223593919;MYBPC2|1.243510197	3	14	120	21769	http://www.ebi.ac.uk/QuickGO/GTerm?id=GO:0051371
9	9	calcium ion transmembrane transporter activity	GO:0015085	0.000131	0.00828	RYR3|1.208753681;ATP2B4|1.454010951;ATP2B2|1.385296881;A0A3Q2TTX7|1.32240644;CATSPER2|1.202421769;A0A3Q3ATJ1|1.201501275;ATP2A1|1.2337889	7	202	120	21769	http://www.ebi.ac.uk/QuickGO/GTerm?id=GO:0015085
6	6	alpha-actinin binding	GO:0051393	0.000721	0.0374	MYOM2|1.223302409;MYPN|1.223593919;MYBPC2|1.243510197	3	32	120	21769	http://www.ebi.ac.uk/QuickGO/GTerm?id=GO:0051393
10	8,9,10	calcium-transporting ATPase activity	GO:0005388	0.00079	0.0374	ATP2B4|1.454010951;ATP2B2|1.385296881;ATP2A1|1.2337889	3	33	120	21769	http://www.ebi.ac.uk/QuickGO/GTerm?id=GO:0005388
3	3	structural molecule activity conferring elasticity	GO:0097493	0.00106	0.042	MYOM2|1.223302409;MYBPC2|1.243510197	2	9	120	21769	http://www.ebi.ac.uk/QuickGO/GTerm?id=GO:0097493
[truncated: 370 more rows]

## Sheet: BP-P150 vs P120
maxLevel	levels	GO_Name	GO_ID	Pvalue	Pvalue_adjusted	Genes	Count	Pop_Hit	List_Total	Background_Genes	URL
[truncated: 758 more rows]

## Sheet: CC-P150 vs P120
maxLevel	levels	GO_Name	GO_ID	Pvalue	Pvalue_adjusted	Genes	Count	Pop_Hit	List_Total	Background_Genes	URL
[truncated: 170 more rows]

[truncated: 1 more sheets: MF-P150 vs P120]
