# Supplementary material for: Comprehensive Proteomic Characterization of the Pectoralis Major at Three Chronological Ages in Beijing-You Chicken
Source: Front Physiol. 2021 Mar 18;12:658711. doi: 10.3389/fphys.2021.658711 (PMC8012914; doi:10.3389/fphys.2021.658711)
Supplement: Supplementary Table 4 — KEGG pathway enrichment analysis in chicken breast muscle. [file Table_4.xlsx]

## Sheet: P120 vs P90
Pathway Name	Pathway ID	Pvalue	Pvalue_adjusted	Genes	Count	Pop Hit	List_Total	Background Genes	URL	First class	Secondary class
Glycolysis / Gluconeogenesis	gga00010	0.00904	0.235	LDHA|1.406541698;ENO3|1.243593921	2	51	13	4508	http://www.kegg.jp/kegg-bin/show_pathway?gga00010/gga:396221%09red/gga:396016%09red	Metabolism	Carbohydrate metabolism
Oocyte meiosis	gga04114	0.0278	0.277	YWHAG|1.319861902;PPP1CB|0.799006051	2	92	13	4508	http://www.kegg.jp/kegg-bin/show_pathway?gga04114/gga:427820%09red/gga:396019%09blue	Cellular Processes	Cell growth and death
Tight junction	gga04530	0.0459	0.277	MYLPF|1.348959455;P13538|1.306581388	2	121	13	4508	http://www.kegg.jp/kegg-bin/show_pathway?gga04530/gga:776775%09red/gga:427788%09red	Cellular Processes	Cellular community
Adrenergic signaling in cardiomyocytes	gga04261	0.0473	0.277	TPM1|1.390357267;PPP1CB|0.799006051	2	123	13	4508	http://www.kegg.jp/kegg-bin/show_pathway?gga04261/gga:396366%09red/gga:396019%09blue	Organismal Systems	Circulatory system
Herpes simplex infection	gga05168	0.0675	0.277	SRSF2|0.465409726;PPP1CB|0.799006051	2	150	13	4508	http://www.kegg.jp/kegg-bin/show_pathway?gga05168/gga:396195%09blue/gga:396019%09blue	Human Diseases	Infectious diseases: Viral
Propanoate metabolism	gga00640	0.0806	0.277	LDHA|1.406541698	1	29	13	4508	http://www.kegg.jp/kegg-bin/show_pathway?gga00640/gga:396221%09red	Metabolism	Carbohydrate metabolism
Pyruvate metabolism	gga00620	0.0939	0.277	LDHA|1.406541698	1	34	13	4508	http://www.kegg.jp/kegg-bin/show_pathway?gga00620/gga:396221%09red	Metabolism	Carbohydrate metabolism
Regulation of actin cytoskeleton	gga04810	0.0962	0.277	MYLPF|1.348959455;PPP1CB|0.799006051	2	184	13	4508	http://www.kegg.jp/kegg-bin/show_pathway?gga04810/gga:776775%09red/gga:396019%09blue	Cellular Processes	Cell motility
Focal adhesion	gga04510	0.098	0.277	MYLPF|1.348959455;PPP1CB|0.799006051	2	186	13	4508	http://www.kegg.jp/kegg-bin/show_pathway?gga04510/gga:776775%09red/gga:396019%09blue	Cellular Processes	Cellular community
Cysteine and methionine metabolism	gga00270	0.107	0.277	LDHA|1.406541698	1	39	13	4508	http://www.kegg.jp/kegg-bin/show_pathway?gga00270/gga:396221%09red	Metabolism	Amino acid metabolism
Arginine and proline metabolism	gga00330	0.117	0.277	CKM|1.28135235	1	43	13	4508	http://www.kegg.jp/kegg-bin/show_pathway?gga00330/gga:396507%09red	Metabolism	Amino acid metabolism
Endocytosis	gga04144	0.148	0.3	CAPZA2|1.308764545;RAB5C|2.549741805	2	238	13	4508	http://www.kegg.jp/kegg-bin/show_pathway?gga04144/gga:417771%09red/gga:395197%09red	Cellular Processes	Transport and catabolism
Biosynthesis of amino acids	gga01230	0.163	0.3	ENO3|1.243593921	1	61	13	4508	http://www.kegg.jp/kegg-bin/show_pathway?gga01230/gga:396016%09red	Metabolism	Global and overview maps
Cardiac muscle contraction	gga04260	0.165	0.3	TPM1|1.390357267	1	62	13	4508	http://www.kegg.jp/kegg-bin/show_pathway?gga04260/gga:396366%09red	Organismal Systems	Circulatory system
RNA degradation	gga03018	0.177	0.3	ENO3|1.243593921	1	67	13	4508	http://www.kegg.jp/kegg-bin/show_pathway?gga03018/gga:396016%09red	Genetic Information Processing	Folding, sorting and degradation
mRNA surveillance pathway	gga03015	0.184	0.3	PPP1CB|0.799006051	1	70	13	4508	http://www.kegg.jp/kegg-bin/show_pathway?gga03015/gga:396019%09blue	Genetic Information Processing	Translation
Carbon metabolism	gga01200	0.247	0.343	ENO3|1.243593921	1	97	13	4508	http://www.kegg.jp/kegg-bin/show_pathway?gga01200/gga:396016%09red	Metabolism	Global and overview maps
Insulin resistance	gga04931	0.253	0.343	PPP1CB|0.799006051	1	100	13	4508	http://www.kegg.jp/kegg-bin/show_pathway?gga04931/gga:396019%09blue	-	-
Vascular smooth muscle contraction	gga04270	0.26	0.343	PPP1CB|0.799006051	1	103	13	4508	http://www.kegg.jp/kegg-bin/show_pathway?gga04270/gga:396019%09blue	Organismal Systems	Circulatory system
Spliceosome	gga03040	0.273	0.343	SRSF2|0.465409726	1	109	13	4508	http://www.kegg.jp/kegg-bin/show_pathway?gga03040/gga:396195%09blue	Genetic Information Processing	Transcription
Cell cycle	gga04110	0.286	0.343	YWHAG|1.319861902	1	115	13	4508	http://www.kegg.jp/kegg-bin/show_pathway?gga04110/gga:427820%09red	Cellular Processes	Cell growth and death
Insulin signaling pathway	gga04910	0.298	0.343	PPP1CB|0.799006051	1	121	13	4508	http://www.kegg.jp/kegg-bin/show_pathway?gga04910/gga:396019%09blue	Organismal Systems	Endocrine system
Ribosome	gga03010	0.307	0.343	RPL27|1.485323169	1	125	13	4508	http://www.kegg.jp/kegg-bin/show_pathway?gga03010/gga:396280%09red	Genetic Information Processing	Translation
Phagosome	gga04145	0.317	0.343	RAB5C|2.549741805	1	130	13	4508	http://www.kegg.jp/kegg-bin/show_pathway?gga04145/gga:395197%09red	Cellular Processes	Transport and catabolism
Calcium signaling pathway	gga04020	0.377	0.392	ATP2A1|1.2337889	1	161	13	4508	http://www.kegg.jp/kegg-bin/show_pathway?gga04020/gga:396528%09red	Environmental Information Processing	Signal transduction
Metabolic pathways	gga01100	0.641	0.641	LDHA|1.406541698;CKM|1.28135235;ENO3|1.243593921	3	1088	13	4508	http://www.kegg.jp/kegg-bin/show_pathway?gga01100/gga:396221%09red/gga:396507%09red/gga:396016%09red	Metabolism	Global and overview maps

## Sheet: P150 vs P120
Pathway Name	Pathway ID	Pvalue	Pvalue_adjusted	Genes	Count	Pop Hit	List_Total	Background Genes	URL	First class	Secondary class
Adrenergic signaling in cardiomyocytes	gga04261	0.00427	0.031	PPP1CB|1.253807631;ATP1B4|0.753459791	2	123	4	4508	http://www.kegg.jp/kegg-bin/show_pathway?gga04261/gga:396019%09red/gga:422365%09blue	Organismal Systems	Circulatory system
Phagosome	gga04145	0.00477	0.031	COMP|1.97707478;RAB5C|0.778265455	2	130	4	4508	http://www.kegg.jp/kegg-bin/show_pathway?gga04145/gga:420120%09red/gga:395197%09blue	Cellular Processes	Transport and catabolism
Focal adhesion	gga04510	0.00962	0.0417	COMP|1.97707478;PPP1CB|1.253807631	2	186	4	4508	http://www.kegg.jp/kegg-bin/show_pathway?gga04510/gga:420120%09red/gga:396019%09red	Cellular Processes	Cellular community
Cardiac muscle contraction	gga04260	0.0539	0.128	ATP1B4|0.753459791	1	62	4	4508	http://www.kegg.jp/kegg-bin/show_pathway?gga04260/gga:422365%09blue	Organismal Systems	Circulatory system
mRNA surveillance pathway	gga03015	0.0607	0.128	PPP1CB|1.253807631	1	70	4	4508	http://www.kegg.jp/kegg-bin/show_pathway?gga03015/gga:396019%09red	Genetic Information Processing	Translation
ECM-receptor interaction	gga04512	0.0641	0.128	COMP|1.97707478	1	74	4	4508	http://www.kegg.jp/kegg-bin/show_pathway?gga04512/gga:420120%09red	Environmental Information Processing	Signaling molecules and interaction
Oocyte meiosis	gga04114	0.0792	0.128	PPP1CB|1.253807631	1	92	4	4508	http://www.kegg.jp/kegg-bin/show_pathway?gga04114/gga:396019%09red	Cellular Processes	Cell growth and death
Insulin resistance	gga04931	0.0858	0.128	PPP1CB|1.253807631	1	100	4	4508	http://www.kegg.jp/kegg-bin/show_pathway?gga04931/gga:396019%09red	-	-
Vascular smooth muscle contraction	gga04270	0.0883	0.128	PPP1CB|1.253807631	1	103	4	4508	http://www.kegg.jp/kegg-bin/show_pathway?gga04270/gga:396019%09red	Organismal Systems	Circulatory system
Insulin signaling pathway	gga04910	0.103	0.134	PPP1CB|1.253807631	1	121	4	4508	http://www.kegg.jp/kegg-bin/show_pathway?gga04910/gga:396019%09red	Organismal Systems	Endocrine system
Herpes simplex infection	gga05168	0.127	0.15	PPP1CB|1.253807631	1	150	4	4508	http://www.kegg.jp/kegg-bin/show_pathway?gga05168/gga:396019%09red	Human Diseases	Infectious diseases: Viral
Regulation of actin cytoskeleton	gga04810	0.154	0.166	PPP1CB|1.253807631	1	184	4	4508	http://www.kegg.jp/kegg-bin/show_pathway?gga04810/gga:396019%09red	Cellular Processes	Cell motility
Endocytosis	gga04144	0.195	0.195	RAB5C|0.778265455	1	238	4	4508	http://www.kegg.jp/kegg-bin/show_pathway?gga04144/gga:395197%09blue	Cellular Processes	Transport and catabolism
